# Supplementary material for: Causal role of immune cells in prostate cancer: a bidirectional Mendelian-randomization analyses
Source: PubMed Central journal article supplement (PMC11236311; doi:10.18632/aging.205942), 2024-06-17
Supplement: aging-16-205942-s001.pdf [file aging-16-205942-s001.pdf]

**SUPPLEMENTARY FIGURES**

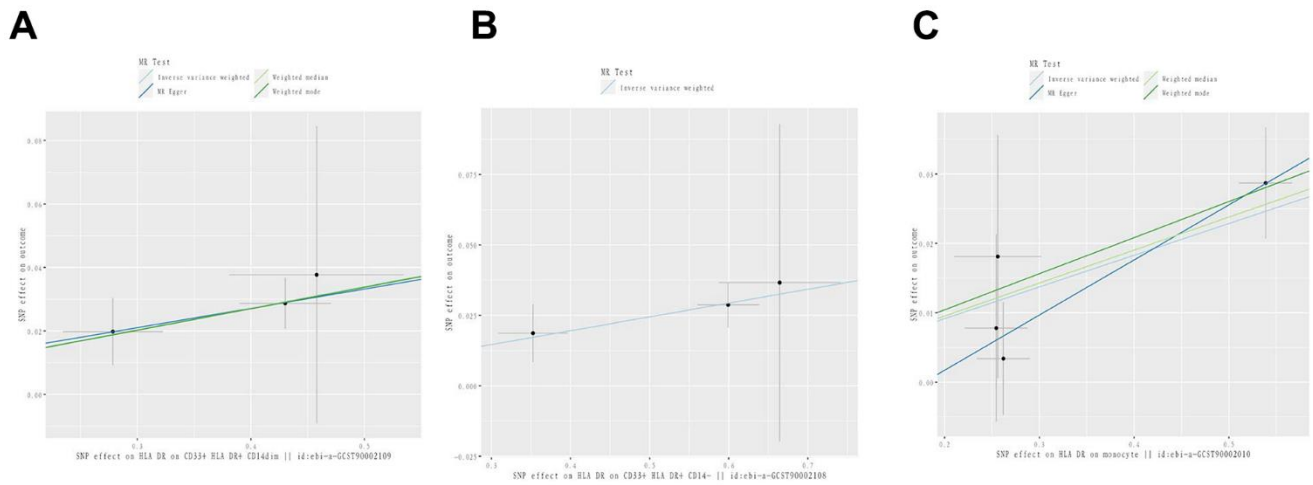

**Supplementary Figure 1. The scatter plots for the Mendelian randomization immune cells-to-prostate cancer. (A) HLA DR on CD33+ HLA DR+ CD14dim, (B) HLA DR on CD33+ HLA DR+ CD14-, (C) HLA DR on monocyte.**

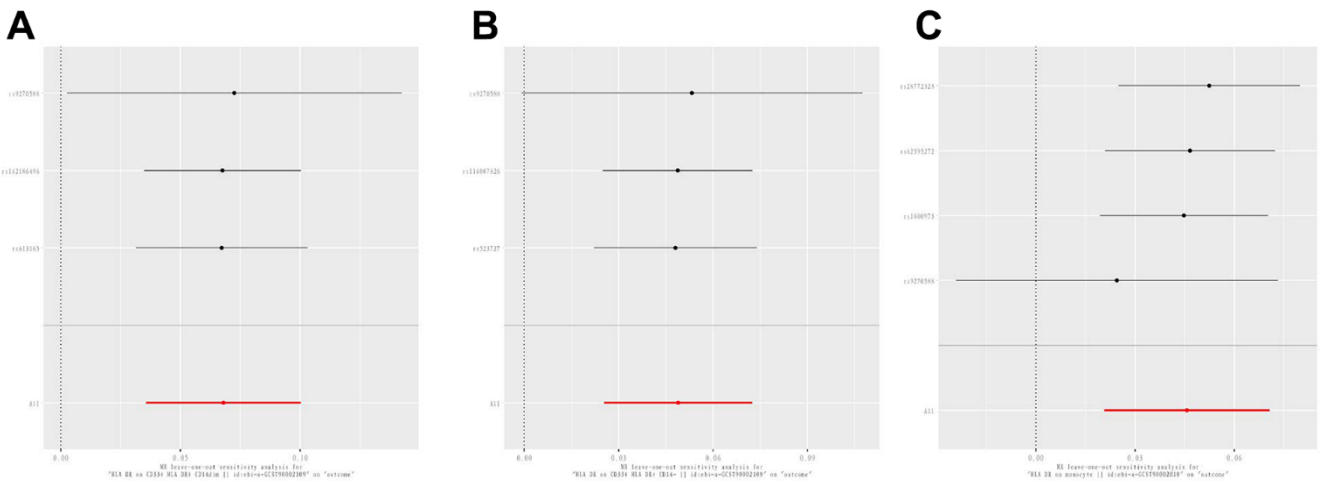

**Supplementary Figure 2. The leave-one-out sensitivity analysis between prostate cancer and immune cells. (A) HLA DR on CD33+ HLA DR+ CD14dim, (B) HLA DR on CD33+ HLA DR+ CD14-, (C) HLA DR on monocyte.**
