# Supplementary material for: Causal role of immune cells in prostate cancer: a bidirectional Mendelian-randomization analyses
Source: Aging (Albany NY). 2024 Jun 17;16(12):10477–88. doi: 10.18632/aging.205942 (PMC11236311; doi:10.18632/aging.205942)
Supplement: Supplementary Table 2 [file aging-16-205942-s003.xlsx]

## Sheet: Sheet1
Supplementary Table 2. Detailed information on genetic instruments of 731 immune cell signatures.
SNP	effect_allele.exposure	other_allele.exposure	effect_allele.outcome	other_allele.outcome	beta.exposure	beta.outcome	eaf.exposure	eaf.outcome	chr.outcome	pos.outcome	se.outcome	pval.outcome	samplesize.outcome	ncontrol.outcome	outcome	samplesize.exposure	pos.exposure	se.exposure	pval.exposure	chr.exposure	exposure trait	outcome trait	steiger_pval	R2	F
rs11657531	T	C	T	C	-0.1468	0.0057	0.4882	0.4686	17	2731370	0.0086	0.5045	140254	61106	outcome	3657	2731370	0.0236	5.52497e-10	17	IgD+ B cell %Lymphocyte	prostate cancer	1.70556e-09	0.0107691	39.7896
rs12874404	G	A	G	A	0.1898	-0.0188	0.3257	0.0595	13	108993494	0.0193	0.3308	140254	61106	outcome	3657	108993494	0.02599	3.43084e-13	13	IgD+ B cell %Lymphocyte	prostate cancer	1.98013e-12	0.0158232	58.7635
rs115805162	T	C	T	C	-0.1935	-0.0042	0.2087	0.0657	1	161410253	0.0172	0.8093	140254	61106	outcome	3374	161410253	0.03213	1.911e-09	1	Dendritic Cell Absolute Count	prostate cancer	3.58243e-09	0.0123667	42.2228
rs55971447	T	C	T	C	0.5889	-0.0202	0.2358	0.1176	1	161515326	0.0134	0.1325	140254	61106	outcome	3374	161515326	0.02846	1.19812e-89	1	Dendritic Cell Absolute Count	prostate cancer	2.73493e-87	0.124987	481.656
rs75072970	C	T	C	T	0.3483	-0.0113	0.0532	0.0425	1	161058351	0.0216	0.6026	140254	61106	outcome	3374	161058351	0.05681	9.7389e-10	1	Dendritic Cell Absolute Count	prostate cancer	2.42634e-09	0.012221	41.7191
rs115805162	T	C	T	C	-0.2673	-0.0042	0.2083	0.0657	1	161410253	0.0172	0.8093	140254	61106	outcome	3387	161410253	0.03328	1.29211e-15	1	CD86+ myeloid Dendritic Cell Absolute Count	prostate cancer	3.46158e-15	0.0235656	81.6946
rs191217950	A	G	A	G	0.7582	0.0406	0.0096	0.0139	1	160940671	0.0374	0.277	140254	61106	outcome	3387	160940671	0.1312	8.13093e-09	1	CD86+ myeloid Dendritic Cell Absolute Count	prostate cancer	3.13603e-08	0.0109315	37.4121
rs71632979	G	A	G	A	0.8088	-0.0188	0.2449	0.1189	1	161526397	0.0135	0.1661	140254	61106	outcome	3387	161526397	0.02785	9.7051e-166	1	CD86+ myeloid Dendritic Cell Absolute Count	prostate cancer	2.43883e-165	0.241939	1080.34
rs71639910	A	G	A	G	0.3667	-0.014	0.0686	0.0287	1	161937774	0.0254	0.5806	140254	61106	outcome	3387	161937774	0.05205	2.25476e-12	1	CD86+ myeloid Dendritic Cell Absolute Count	prostate cancer	6.92791e-12	0.0171835	59.1832
rs75072970	C	T	C	T	0.4059	-0.0113	0.0531	0.0425	1	161058351	0.0216	0.6026	140254	61106	outcome	3387	161058351	0.05879	5.96898e-12	1	CD86+ myeloid Dendritic Cell Absolute Count	prostate cancer	1.75347e-11	0.0165679	57.0271
rs56199187	T	C	T	C	-0.5887	-0.0192	0.2441	0.1179	1	161520931	0.0136	0.1567	140254	61106	outcome	3410	161520931	0.02799	1.96517e-92	1	Plasmacytoid Dendritic Cell %Dendritic Cell	prostate cancer	3.56852e-90	0.127894	499.782
rs876036	C	T	C	T	-0.1835	0.008	0.2645	0.3342	7	50307710	0.0093	0.3894	140254	61106	outcome	3410	50307710	0.02885	2.25201e-10	7	Plasmacytoid Dendritic Cell %Dendritic Cell	prostate cancer	8.31215e-10	0.0131012	45.2415
rs9272459	A	G	A	G	-0.1649	-0.0329	0.5423	0.3927	6	32605578	0.0082	5.69797e-05	140254	61106	outcome	3579	32605578	0.02958	2.66397e-08	6	HLA DR++ monocyte Absolute Count	prostate cancer	1.1525e-06	0.0134987	48.9455
rs138915779	A	C	A	C	-1.347	0.0528	0.0035	0.0162	1	190079170	0.035	0.1315	140254	61106	outcome	3437	190079170	0.2241	2.06201e-09	1	Activated CD4 regulatory T cell %CD4 regulatory T cell	prostate cancer	1.2409e-08	0.0126564	44.0321
rs141066700	G	A	G	A	-0.682	-0.0006	0.0093	0.0147	1	193453479	0.0371	0.9873	140254	61106	outcome	3437	193453479	0.1241	4.18398e-08	1	Activated CD4 regulatory T cell %CD4 regulatory T cell	prostate cancer	6.01731e-08	0.00857085	29.6954
rs17583875	A	G	A	G	-1.532	-0.0122	0.0029	0.0252	1	197924770	0.0286	0.6697	140254	61106	outcome	3437	197924770	0.2241	9.63163e-12	1	Activated CD4 regulatory T cell %CD4 regulatory T cell	prostate cancer	2.52513e-11	0.0135733	47.2657
rs7530076	A	G	A	G	0.4628	-0.0022	0.9748	0.9731	1	195825276	0.0309	0.9437	140254	61106	outcome	3437	195825276	0.08043	9.517e-09	1	Activated CD4 regulatory T cell %CD4 regulatory T cell	prostate cancer	1.4791e-08	0.0105228	36.5303
rs11124653	A	C	A	C	-0.1861	-0.0004	0.5907	0.6084	2	39112166	0.0083	0.9624	140254	61106	outcome	3405	39112166	0.0267	3.74197e-12	2	CD25++ CD45RA+ CD4 not regulatory T cell Absolute Count	prostate cancer	6.77594e-12	0.0167468	57.96
rs116517602	T	C	T	C	1.722	-0.0148	0.0041	0.012	1	198922068	0.0421	0.725301	140254	61106	outcome	3405	198922068	0.1913	3.67282e-19	1	CD25++ CD45RA+ CD4 not regulatory T cell Absolute Count	prostate cancer	1.32004e-18	0.0242156	84.4508
rs12712610	G	A	G	A	0.2347	-0.0188	0.2972	0.1786	2	38897249	0.0113	0.0953301	140254	61106	outcome	3405	38897249	0.02843	2.14981e-16	2	CD25++ CD45RA+ CD4 not regulatory T cell Absolute Count	prostate cancer	3.46734e-15	0.0230111	80.151
rs9916257	T	G	T	G	-0.1904	0.0065	0.5737	0.4305	17	33797371	0.0085	0.4467	140254	61106	outcome	1858	33797371	0.03354	1.591e-08	17	CD33- HLA DR- Absolute Count	prostate cancer	3.12025e-08	0.0177323	33.5052
rs1801274	G	A	G	A	-0.5517	-0.0078	0.3334	0.5082	1	161479745	0.0082	0.3417	140254	61106	outcome	1858	161479745	0.03439	2.5293e-54	1	CD33dim HLA DR+ CD11b- %CD33dim HLA DR+	prostate cancer	4.9262e-54	0.13529	290.385
rs3820097	A	G	A	G	0.4291	0.0043	0.9459	0.8912	1	161049358	0.0142	0.7634	140254	61106	outcome	1858	161049358	0.07422	8.69501e-09	1	CD33dim HLA DR+ CD11b- %CD33dim HLA DR+	prostate cancer	1.26772e-08	0.0188447	35.6476
rs3826007	T	C	T	C	-0.3541	-0.0171	0.2209	0.2498	15	80263217	0.0095	0.0721905	140254	61106	outcome	1858	80263217	0.04034	3.70937e-18	15	CD33dim HLA DR+ CD11b- %CD33dim HLA DR+	prostate cancer	2.83464e-17	0.0431589	83.7161
rs3865444	A	C	A	C	-0.5183	0.0143	0.2132	0.3273	19	51727962	0.0086	0.0949992	140254	61106	outcome	1857	51727962	0.03788	1.14393e-40	19	Basophil %CD33dim HLA DR- CD66b-	prostate cancer	1.13254e-39	0.0901247	183.741
rs4499342	T	C	T	C	0.2541	-0.0043	0.1527	0.1586	19	8786913	0.011	0.6962	140254	61106	outcome	1857	8786913	0.04602	3.85398e-08	19	Basophil %CD33dim HLA DR- CD66b-	prostate cancer	5.81707e-08	0.0167077	31.5193
rs7351079	G	A	G	A	-0.2756	0.0124	0.2722	0.1731	19	51574038	0.0106	0.2408	140254	61106	outcome	1857	51574038	0.03696	1.36994e-13	19	Basophil %CD33dim HLA DR- CD66b-	prostate cancer	4.62843e-13	0.0300946	57.5577
rs17583875	A	G	A	G	-1.51	-0.0122	0.0029	0.0252	1	197924770	0.0286	0.6697	140254	61106	outcome	3395	197924770	0.2336	1.153e-10	1	Effector Memory CD8+ T cell Absolute Count	prostate cancer	2.83146e-10	0.0131862	45.3387
rs11896593	C	G	C	G	0.2701	-0.0177	0.3707	0.2014	2	38925155	0.0106	0.0930401	140254	61106	outcome	3427	38925155	0.02208	1.04112e-33	2	CD45RA+ CD8+ T cell %CD8+ T cell	prostate cancer	7.92065e-32	0.0340376	120.687
rs150956189	C	T	C	T	3.098	0.0571	0.0003	0.0229	1	214625781	0.0333	0.0860201	140254	61106	outcome	3427	214625781	0.5579	3.03403e-08	1	CD45RA+ CD8+ T cell %CD8+ T cell	prostate cancer	1.86118e-07	0.00575683	19.8313
rs17583875	A	G	A	G	1.755	-0.0122	0.0029	0.0252	1	197924770	0.0286	0.6697	140254	61106	outcome	3427	197924770	0.1946	3.06196e-19	1	CD45RA+ CD8+ T cell %CD8+ T cell	prostate cancer	1.27005e-18	0.0178123	62.1137
rs2463509	T	C	T	C	-1.139	0.0276	0.9971	0.9716	2	103672986	0.0287	0.3378	140254	61106	outcome	3427	103672986	0.2039	2.52098e-08	2	CD45RA+ CD8+ T cell %CD8+ T cell	prostate cancer	8.25339e-08	0.00750264	25.8908
rs28578699	C	A	C	A	0.174	-0.008	0.3669	0.438	2	38899155	0.0084	0.342	140254	61106	outcome	3427	38899155	0.02238	9.92887e-15	2	CD45RA+ CD8+ T cell %CD8+ T cell	prostate cancer	5.86601e-14	0.0140653	48.8608
rs111902980	A	G	A	G	0.4732	0.0048	0.0193	0.0332	1	157954450	0.0237	0.8386	140254	61106	outcome	3395	157954450	0.08644	4.71498e-08	1	Effector Memory CD4-CD8- T cell Absolute Count	prostate cancer	7.8979e-08	0.00847643	29.0064
rs6710361	A	G	A	G	0.177	-0.0048	0.1985	0.2466	2	87047145	0.0104	0.639699	140254	61106	outcome	3395	87047145	0.03027	5.45205e-09	2	Effector Memory CD4-CD8- T cell Absolute Count	prostate cancer	1.22301e-08	0.00996875	34.1645
rs9896155	G	A	G	A	0.1522	-0.0193	0.6739	0.4597	17	33794697	0.0085	0.02243	140254	61106	outcome	3395	33794697	0.02556	2.837e-09	17	Effector Memory CD4-CD8- T cell Absolute Count	prostate cancer	3.31539e-08	0.0101814	34.9007
rs3829793	G	C	G	C	0.1677	-0.0084	0.3147	0.3465	1	161194400	0.0084	0.3199	140254	61106	outcome	3629	161194400	0.02704	6.142e-10	1	CD14+ CD16+ monocyte %monocyte	prostate cancer	2.63418e-09	0.0121304	44.5371
rs71632979	G	A	G	A	-0.7013	-0.0188	0.2479	0.1189	1	161526397	0.0135	0.1661	140254	61106	outcome	3629	161526397	0.02722	1.40605e-134	1	CD14+ CD16+ monocyte %monocyte	prostate cancer	1.68072e-132	0.183396	814.565
rs71639910	A	G	A	G	-0.2863	-0.014	0.0704	0.0287	1	161937774	0.0254	0.5806	140254	61106	outcome	3629	161937774	0.04872	4.583e-09	1	CD14+ CD16+ monocyte %monocyte	prostate cancer	1.1672e-08	0.0107286	39.3345
rs147174426	T	A	T	A	-0.5472	-0.0105	0.1717	0.0635	1	161528012	0.0183	0.5646	140254	61106	outcome	3629	161528012	0.03158	1.11789e-64	1	CD16+ monocyte %monocyte	prostate cancer	3.05732e-63	0.0851687	337.665
rs74975395	T	C	T	C	0.2556	0.0668	0.081	0.0168	1	166026114	0.0341	0.0500196	140254	61106	outcome	3629	166026114	0.045	1.45399e-08	1	CD16+ monocyte %monocyte	prostate cancer	1.23706e-07	0.0097264	35.6242
rs73402222	C	T	C	T	0.1905	0.0036	0.3456	0.0634	6	31388449	0.0162	0.8231	140254	61106	outcome	3652	31388449	0.03406	2.39299e-08	6	CD4+/CD8+ T cell	prostate cancer	4.30885e-08	0.0164149	60.9141
rs77650974	A	G	A	G	-0.1502	-0.0205	0.3227	0.1964	18	12394263	0.0109	0.0592598	140254	61106	outcome	3669	12394263	0.02624	1.12199e-08	18	Lymphocyte %leukocyte	prostate cancer	9.22357e-08	0.00986166	36.5229
rs72845743	A	G	A	G	0.3943	-0.0397	0.415	0.1574	6	32528414	0.0118	0.000730298	140254	61106	outcome	3666	32528414	0.07059	2.48897e-08	6	TCRgd T cell %lymphocyte	prostate cancer	6.73201e-07	0.0754897	299.179
rs77650974	A	G	A	G	0.1512	-0.0205	0.3227	0.1964	18	12394263	0.0109	0.0592598	140254	61106	outcome	3669	12394263	0.0265	1.25101e-08	18	Granulocyte %leukocyte	prostate cancer	1.01909e-07	0.00999341	37.0157
rs11579717	A	G	A	G	-1.201	0.011	0.0044	0.0434	1	199999121	0.0222	0.62	140254	61106	outcome	3440	199999121	0.1771	1.41906e-11	1	CD28+ CD45RA- CD8dim T cell %T cell	prostate cancer	3.91051e-11	0.0126373	44.003
rs116759767	A	G	A	G	-0.9923	0.0504	0.0049	0.026	1	189981116	0.0302	0.0956093	140254	61106	outcome	3440	189981116	0.1747	1.45301e-08	1	CD28+ CD45RA- CD8dim T cell %T cell	prostate cancer	9.09091e-08	0.00960238	33.3331
rs146620586	T	G	T	G	-2.445	-0.0372	0.0032	0.0173	1	198524264	0.0373	0.3183	140254	61106	outcome	3440	198524264	0.2667	8.18653e-20	1	CD28+ CD45RA- CD8dim T cell %T cell	prostate cancer	7.63414e-19	0.0381369	136.313
rs112417310	A	G	A	G	0.5116	-0.0128	0.0201	0.0109	1	206855483	0.0423	0.7623	140254	61106	outcome	3657	206855483	0.08936	1.118e-08	1	CD19 on memory B cell	prostate cancer	2.21132e-08	0.0103102	38.0765
rs138920008	C	G	C	G	-1.277	-0.0132	0.0041	0.0432	16	32422808	0.0265	0.6181	140254	61106	outcome	3657	32422808	0.2176	4.84697e-09	16	CD19 on memory B cell	prostate cancer	1.16784e-08	0.0133172	49.3311
rs11548656	G	A	G	A	-0.2363	-0.0247	0.1287	0.0371	16	81916912	0.023	0.2831	140254	61106	outcome	3649	81916912	0.03676	1.47001e-10	16	CD25 on IgD- CD24- B cell	prostate cancer	7.16103e-10	0.0125229	46.2501
rs41294937	C	T	C	T	0.3718	-0.0055	0.1073	0.0487	10	6106621	0.0185	0.767201	140254	61106	outcome	3649	6106621	0.04036	5.23239e-20	10	CD25 on IgD- CD24- B cell	prostate cancer	2.03879e-19	0.0264822	99.2078
rs12138291	A	G	A	G	-0.2773	0.0095	0.1482	0.235	1	166464476	0.0098	0.3318	140254	61106	outcome	2919	166464476	0.03854	7.9671e-13	1	CD3 on CD39+ CD4+ T cell	prostate cancer	3.37845e-12	0.019414	57.7519
rs2949661	T	C	T	C	0.644	0.0114	0.4466	0.3684	1	167424924	0.0085	0.1775	140254	61106	outcome	2919	167424924	0.02499	3.75837e-132	1	CD3 on CD39+ CD4+ T cell	prostate cancer	8.10084e-132	0.205003	752.195
rs4656440	G	C	G	C	-0.3594	-0.0144	0.049	0.0627	1	165218634	0.0175	0.4112	140254	61106	outcome	2919	165218634	0.06326	1.467e-08	1	CD3 on CD39+ CD4+ T cell	prostate cancer	3.91943e-08	0.0120382	35.5434
rs858496	G	T	G	T	0.1732	-0.0056	0.6622	0.7068	1	167500918	0.01	0.5729	140254	61106	outcome	2919	167500918	0.02866	1.68698e-09	1	CD3 on CD39+ CD4+ T cell	prostate cancer	3.90779e-09	0.0134207	39.6807
rs1886730	C	T	C	T	0.2857	0.015	0.5778	0.4875	1	2488608	0.0085	0.0779202	140254	61106	outcome	1247	2488608	0.03841	1.90722e-13	1	HVEM on Central Memory CD4+ T cell	prostate cancer	6.80988e-13	0.0398241	51.6375
rs1886730	C	T	C	T	0.3092	0.015	0.5778	0.4875	1	2488608	0.0085	0.0779202	140254	61106	outcome	1247	2488608	0.03847	2.10378e-15	1	HVEM on Central Memory CD8+ T cell	prostate cancer	8.1173e-15	0.046645	60.9143
rs10919544	C	T	C	T	-0.2555	-0.0155	0.5475	0.3253	1	161508763	0.0092	0.0929202	140254	61106	outcome	3113	161508763	0.02745	2.40381e-20	1	CD16-CD56 on Natural Killer	prostate cancer	4.90031e-19	0.0323455	103.991
rs111579151	T	C	T	C	-0.5632	-0.0193	0.0323	0.0378	11	111848073	0.0232	0.4051	140254	61106	outcome	3113	111848073	0.07427	4.45246e-14	11	CD16-CD56 on Natural Killer	prostate cancer	1.92659e-13	0.0198289	62.9356
rs11214436	T	G	T	G	0.3221	-0.0072	0.3055	0.4055	11	112830782	0.0083	0.3831	140254	61106	outcome	3113	112830782	0.02878	1.59294e-28	11	CD16-CD56 on Natural Killer	prostate cancer	1.65125e-27	0.0440245	143.268
rs117533070	T	C	T	C	0.2856	-0.0535	0.0816	0.0129	11	112710664	0.0418	0.2003	140254	61106	outcome	3113	112710664	0.04932	7.71294e-09	11	CD16-CD56 on Natural Killer	prostate cancer	3.24035e-08	0.0122256	38.5044
rs148849191	T	C	T	C	-0.7822	-0.0366	0.0124	0.0184	11	113153223	0.0324	0.2576	140254	61106	outcome	3113	113153223	0.1208	1.109e-10	11	CD16-CD56 on Natural Killer	prostate cancer	4.88234e-10	0.0149854	47.3288
rs17504675	A	G	A	G	-0.4696	0.0194	0.0308	0.0259	11	110737507	0.0271	0.4753	140254	61106	outcome	3113	110737507	0.07632	8.58697e-10	11	CD16-CD56 on Natural Killer	prostate cancer	2.41296e-09	0.0131659	41.5055
rs77291736	T	C	T	C	-1.076	-0.0031	0.1086	0.0318	11	112749800	0.0259	0.9054	140254	61106	outcome	3113	112749800	0.03832	6.93426e-155	11	CD16-CD56 on Natural Killer	prostate cancer	5.43991e-157	0.224159	898.844
rs62184016	C	T	C	T	-0.4171	0.0089	0.1986	0.1704	2	204623481	0.011	0.4167	140254	61106	outcome	2920	204623481	0.03444	5.76766e-33	2	CD28 on CD45RA+ CD4+ T cell	prostate cancer	5.49615e-32	0.0553782	171.067
rs72928038	A	G	A	G	0.3653	-0.0015	0.199	0.1658	6	90976768	0.0119	0.9004	140254	61106	outcome	2920	90976768	0.03405	2.25476e-26	6	CD28 on CD45RA+ CD4+ T cell	prostate cancer	6.27746e-26	0.0425417	129.652
rs10882701	C	A	C	A	-0.1597	-0.0017	0.5156	0.5719	10	97741071	0.009	0.8465	140254	61106	outcome	2920	97741071	0.02758	7.66196e-09	10	CD28 on CD39+ CD4+ T cell	prostate cancer	1.25358e-08	0.0127396	37.6539
rs117458836	A	G	A	G	0.6927	-0.0367	0.0187	0.0132	10	96773382	0.0387	0.3426	140254	61106	outcome	2920	96773382	0.1041	3.44826e-11	10	CD28 on CD39+ CD4+ T cell	prostate cancer	1.25102e-10	0.0176102	52.3077
rs12778618	C	T	C	T	0.5196	0.1223	0.0457	0.0151	10	95633120	0.0395	0.001942	140254	61106	outcome	2920	95633120	0.06591	4.43711e-15	10	CD28 on CD39+ CD4+ T cell	prostate cancer	2.26676e-13	0.0235488	70.3727
rs7084635	G	A	G	A	0.168	0.0124	0.7288	0.5883	10	97062753	0.0092	0.1794	140254	61106	outcome	2920	97062753	0.03066	4.61095e-08	10	CD28 on CD39+ CD4+ T cell	prostate cancer	1.7818e-07	0.011157	32.9234
rs7426056	G	A	G	A	0.3005	0.003	0.5717	0.7606	2	204612058	0.0097	0.757801	140254	61106	outcome	2920	204612058	0.02793	1.67417e-26	2	CD28 on CD39+ CD4+ T cell	prostate cancer	6.03913e-26	0.0442217	135.009
rs1973872	G	T	G	T	0.3858	-0.0032	0.601	0.7312	2	204631016	0.0094	0.735201	140254	61106	outcome	2920	204631016	0.02783	2.24388e-42	2	CD28 on CD28+ CD4+ T cell	prostate cancer	1.13547e-41	0.0713842	224.311
rs72928038	A	G	A	G	0.2512	-0.0015	0.199	0.1658	6	90976768	0.0119	0.9004	140254	61106	outcome	2920	90976768	0.03397	1.83992e-13	6	CD28 on CD28+ CD4+ T cell	prostate cancer	3.41002e-13	0.0201166	59.9054
rs71632979	G	A	G	A	0.5196	-0.0188	0.2454	0.1189	1	161526397	0.0135	0.1661	140254	61106	outcome	2871	161526397	0.031	3.13401e-60	1	CD86 on myeloid Dendritic Cell	prostate cancer	1.49574e-58	0.0999907	318.745
rs66570838	A	T	A	T	-0.3173	-0.0287	0.1051	0.1291	5	35840724	0.0119	0.0156099	140254	61106	outcome	2920	35840724	0.04155	2.99778e-14	5	CD127 on CD28+ CD45RA+ CD8+ T cell	prostate cancer	6.57998e-13	0.0189386	56.3296
rs11567754	A	T	A	T	-0.2975	-0.0318	0.105	0.1357	5	35872190	0.0116	0.00617803	140254	61106	outcome	2920	35872190	0.04334	8.07607e-12	5	CD127 on CD45RA+ CD4+ T cell	prostate cancer	1.73169e-10	0.0166347	49.3613
rs1573735	T	C	T	C	-0.2069	0.0107	0.3262	0.5435	16	423696	0.0085	0.2053	140254	61106	outcome	2920	423696	0.02839	4.01976e-13	16	CD127 on CD45RA+ CD4+ T cell	prostate cancer	2.37413e-12	0.0188177	55.9631
rs6681289	A	G	A	G	-0.186	0.0014	0.1884	0.133	1	119421209	0.0122	0.9062	140254	61106	outcome	3118	119421209	0.03337	2.72603e-08	1	CD25 on CD39+ resting CD4 regulatory T cell	prostate cancer	4.10988e-08	0.0105798	33.3193
rs111695695	A	C	A	C	-0.5128	0.0086	0.0772	0.0314	19	51897760	0.0303	0.7772	140254	61106	outcome	1554	51897760	0.06836	1.05609e-13	19	CD33 on Immature Myeloid-Derived Suppressor Cells	prostate cancer	1.53731e-13	0.0374672	60.4125
rs58483275	T	C	T	C	0.5046	-0.0653	0.0734	0.0111	19	51868443	0.0475	0.1696	140254	61106	outcome	1554	51868443	0.07256	5.20955e-12	19	CD33 on Immature Myeloid-Derived Suppressor Cells	prostate cancer	1.64277e-11	0.0346348	55.6818
rs7245846	A	G	A	G	-1.115	0.0124	0.1934	0.3534	19	51731176	0.0085	0.1466	140254	61106	outcome	1554	51731176	0.0393	6.08135e-143	19	CD33 on Immature Myeloid-Derived Suppressor Cells	prostate cancer	1.19735e-149	0.387877	983.44
rs7351079	G	A	G	A	-0.3351	0.0124	0.258	0.1731	19	51574038	0.0106	0.2408	140254	61106	outcome	1554	51574038	0.0424	5.06641e-15	19	CD33 on Immature Myeloid-Derived Suppressor Cells	prostate cancer	1.55027e-14	0.0429935	69.7235
rs75773078	A	G	A	G	-0.5252	-0.0102	0.0705	0.0762	19	51742145	0.0154	0.5076	140254	61106	outcome	1554	51742145	0.07057	1.63795e-13	19	CD33 on Immature Myeloid-Derived Suppressor Cells	prostate cancer	3.18178e-13	0.0361508	58.2104
rs79377141	A	G	A	G	0.3376	0.008	0.2008	0.0938	19	51538952	0.0146	0.5824	140254	61106	outcome	1554	51538952	0.0459	3.07326e-13	19	CD33 on Immature Myeloid-Derived Suppressor Cells	prostate cancer	5.46146e-13	0.0365809	58.9292
rs6453485	T	C	T	C	0.3322	0.007	0.0997	0.2471	5	79151752	0.0094	0.4569	140254	61106	outcome	1570	79151752	0.06048	4.63799e-08	5	CD14 on Monocytic Myeloid-Derived Suppressor Cells	prostate cancer	8.09877e-08	0.0198112	31.6919
rs1801274	G	A	G	A	-0.3379	-0.0078	0.3302	0.5082	1	161479745	0.0082	0.3417	140254	61106	outcome	1634	161479745	0.03798	1.47299e-18	1	CD14 on CD33dim HLA DR+ CD11b+	prostate cancer	4.28932e-18	0.0505043	86.8072
rs139795227	C	A	C	A	-0.5867	0.0103	0.0479	0.021	1	92842367	0.0316	0.745399	140254	61106	outcome	2871	92842367	0.06432	1.35613e-19	1	CD80 on CD62L+ myeloid Dendritic Cell	prostate cancer	3.92958e-19	0.0313964	92.9961
rs6445484	G	A	G	A	0.4659	0.0023	0.8964	0.9486	3	52503800	0.0182	0.8987	140254	61106	outcome	2871	52503800	0.04526	1.96381e-24	3	CD80 on CD62L+ myeloid Dendritic Cell	prostate cancer	5.04819e-24	0.040316	120.526
rs11615628	A	G	A	G	-0.2032	0.0124	0.2466	0.2929	12	6903631	0.0096	0.1981	140254	61106	outcome	2920	6903631	0.03171	1.70801e-10	12	CD4 on CD28+ CD4+ T cell	prostate cancer	8.1377e-10	0.0153425	45.467
rs2844608	T	C	T	C	0.1884	0.0087	0.4572	0.3855	6	31247414	0.0081	0.2874	140254	61106	outcome	2920	31247414	0.03065	9.03504e-10	6	CD4 on CD28+ CD4+ T cell	prostate cancer	3.28923e-09	0.0176172	52.329
rs61802329	T	C	T	C	0.1669	-0.0006	0.4673	0.4937	1	161589626	0.0091	0.9469	140254	61106	outcome	2872	161589626	0.02718	9.47807e-10	1	CD11c on myeloid Dendritic Cell	prostate cancer	1.40364e-09	0.0138682	40.3616
rs67898294	T	C	T	C	0.3276	-0.0081	0.3505	0.1658	16	31362711	0.011	0.4619	140254	61106	outcome	2872	31362711	0.02803	7.18952e-31	16	CD11c on myeloid Dendritic Cell	prostate cancer	5.6592e-30	0.0488635	147.443
rs75841521	A	G	A	G	-0.442	-0.0046	0.028	0.0156	2	59592691	0.0376	0.9036	140254	61106	outcome	2872	59592691	0.08067	4.64804e-08	2	CD11c on myeloid Dendritic Cell	prostate cancer	6.80517e-08	0.0106341	30.8478
rs78520150	A	C	A	C	0.3947	-0.0002	0.0376	0.0228	1	19786101	0.0302	0.995	140254	61106	outcome	2872	19786101	0.07143	3.56903e-08	1	CD11c on myeloid Dendritic Cell	prostate cancer	4.8022e-08	0.0112748	32.7276
rs79298699	T	C	T	C	-0.279	-0.0197	0.0825	0.0737	16	31402042	0.017	0.2444	140254	61106	outcome	2872	31402042	0.04807	7.21606e-09	16	CD11c on myeloid Dendritic Cell	prostate cancer	2.5574e-08	0.0117842	34.2238
rs147258092	T	C	T	C	-0.3132	-0.019	0.0719	0.0646	16	31624520	0.0184	0.3012	140254	61106	outcome	2872	31624520	0.05248	2.68701e-09	16	CD11c on CD62L+ myeloid Dendritic Cell	prostate cancer	9.0045e-09	0.0130917	38.0717
rs4493054	A	G	A	G	0.3611	0.0226	0.7366	0.6785	16	31361988	0.0086	0.00842908	140254	61106	outcome	2872	31361988	0.02998	1.21899e-32	16	CD11c on CD62L+ myeloid Dendritic Cell	prostate cancer	2.32445e-30	0.0505979	152.955
rs1801274	G	A	G	A	0.2755	-0.0078	0.3209	0.5082	1	161479745	0.0082	0.3417	140254	61106	outcome	2850	161479745	0.02934	1.20393e-20	1	CD11c on monocyte	prostate cancer	8.01862e-20	0.0330808	97.4376
rs9932817	G	T	G	T	-0.1683	-0.0058	0.3825	0.4724	16	48503912	0.0083	0.4866	140254	61106	outcome	2850	48503912	0.02845	3.72701e-09	16	CD11c on monocyte	prostate cancer	9.19323e-09	0.0133803	38.624
rs116007826	G	A	G	A	0.8001	0.0366	0.0686	0.0061	6	31569745	0.0563	0.5162	140254	61106	outcome	2872	31569745	0.06015	3.1369e-39	6	HLA DR on myeloid Dendritic Cell	prostate cancer	2.61584e-38	0.0818048	255.697
rs2858885	T	C	T	C	-0.3187	-0.0043	0.5362	0.4142	6	32699782	0.0081	0.595899	140254	61106	outcome	2872	32699782	0.0308	1.13292e-24	6	HLA DR on myeloid Dendritic Cell	prostate cancer	5.3258e-24	0.0505186	152.703
rs29221	G	C	G	C	0.3075	0.0051	0.1555	0.2569	6	29589124	0.0094	0.585	140254	61106	outcome	2872	29589124	0.04061	4.98655e-14	6	HLA DR on myeloid Dendritic Cell	prostate cancer	1.43668e-13	0.0248342	73.0893
rs55971447	T	C	T	C	-0.4802	-0.0202	0.2371	0.1176	1	161515326	0.0134	0.1325	140254	61106	outcome	2872	161515326	0.03135	5.93745e-51	1	HLA DR on myeloid Dendritic Cell	prostate cancer	3.18357e-49	0.0834206	261.207
rs6925683	G	T	G	T	0.2917	0.0028	0.1238	0.2363	6	33894292	0.0101	0.7798	140254	61106	outcome	2872	33894292	0.04331	1.95299e-11	6	HLA DR on myeloid Dendritic Cell	prostate cancer	3.85706e-11	0.0184598	53.976
rs9267650	T	A	T	A	-0.2465	-0.006	0.2881	0.0453	6	31824912	0.0191	0.752	140254	61106	outcome	2872	31824912	0.03657	1.91779e-11	6	HLA DR on myeloid Dendritic Cell	prostate cancer	3.85677e-11	0.0249245	73.3618
rs12449199	G	T	G	T	-0.1674	-0.0041	0.3064	0.3022	16	10968440	0.0093	0.655901	140254	61106	outcome	3060	10968440	0.02775	1.82701e-09	16	HLA DR on HLA DR+ CD4+ T cell	prostate cancer	3.84776e-09	0.0119107	36.8621
rs11657531	T	C	T	C	-0.1468	0.0057	0.4882	0.4686	17	2731370	0.0086	0.5045	140254	61106	outcome	3657	2731370	0.0236	5.52e-10	17	IgD+ B cell %Lymphocyte	prostate cancer	1.71e-09	0.0107691	39.7896
rs12874404	G	A	G	A	0.1898	-0.0188	0.3257	0.0595	13	108993494	0.0193	0.3308	140254	61106	outcome	3657	108993494	0.02599	3.43e-13	13	IgD+ B cell %Lymphocyte	prostate cancer	1.98e-12	0.0158232	58.7635
rs115805162	T	C	T	C	-0.1935	-0.0042	0.2087	0.0657	1	161410253	0.0172	0.8093	140254	61106	outcome	3374	161410253	0.03213	1.91e-09	1	Dendritic Cell Absolute Count	prostate cancer	3.58e-09	0.0123667	42.2228
rs55971447	T	C	T	C	0.5889	-0.0202	0.2358	0.1176	1	161515326	0.0134	0.1325	140254	61106	outcome	3374	161515326	0.02846	1.2e-89	1	Dendritic Cell Absolute Count	prostate cancer	2.73e-87	0.124987	481.656
rs75072970	C	T	C	T	0.3483	-0.0113	0.0532	0.0425	1	161058351	0.0216	0.6026	140254	61106	outcome	3374	161058351	0.05681	9.74e-10	1	Dendritic Cell Absolute Count	prostate cancer	2.43e-09	0.012221	41.7191
rs115805162	T	C	T	C	-0.2673	-0.0042	0.2083	0.0657	1	161410253	0.0172	0.8093	140254	61106	outcome	3387	161410253	0.03328	1.29e-15	1	CD86+ myeloid Dendritic Cell Absolute Count	prostate cancer	3.46e-15	0.0235656	81.6946
rs191217950	A	G	A	G	0.7582	0.0406	0.0096	0.0139	1	160940671	0.0374	0.277	140254	61106	outcome	3387	160940671	0.1312	8.13e-09	1	CD86+ myeloid Dendritic Cell Absolute Count	prostate cancer	3.14e-08	0.0109315	37.4121
rs71632979	G	A	G	A	0.8088	-0.0188	0.2449	0.1189	1	161526397	0.0135	0.1661	140254	61106	outcome	3387	161526397	0.02785	9.71e-166	1	CD86+ myeloid Dendritic Cell Absolute Count	prostate cancer	2.44e-165	0.241939	1080.34
rs71639910	A	G	A	G	0.3667	-0.014	0.0686	0.0287	1	161937774	0.0254	0.5806	140254	61106	outcome	3387	161937774	0.05205	2.25e-12	1	CD86+ myeloid Dendritic Cell Absolute Count	prostate cancer	6.93e-12	0.0171835	59.1832
rs75072970	C	T	C	T	0.4059	-0.0113	0.0531	0.0425	1	161058351	0.0216	0.6026	140254	61106	outcome	3387	161058351	0.05879	5.97e-12	1	CD86+ myeloid Dendritic Cell Absolute Count	prostate cancer	1.75e-11	0.0165679	57.0271
rs56199187	T	C	T	C	-0.5887	-0.0192	0.2441	0.1179	1	161520931	0.0136	0.1567	140254	61106	outcome	3410	161520931	0.02799	1.97e-92	1	Plasmacytoid Dendritic Cell %Dendritic Cell	prostate cancer	3.57e-90	0.127894	499.782
rs876036	C	T	C	T	-0.1835	0.008	0.2645	0.3342	7	50307710	0.0093	0.3894	140254	61106	outcome	3410	50307710	0.02885	2.25e-10	7	Plasmacytoid Dendritic Cell %Dendritic Cell	prostate cancer	8.31e-10	0.0131012	45.2415
rs9272459	A	G	A	G	-0.1649	-0.0329	0.5423	0.3927	6	32605578	0.0082	5.7e-05	140254	61106	outcome	3579	32605578	0.02958	2.66e-08	6	HLA DR++ monocyte Absolute Count	prostate cancer	1.15e-06	0.0134987	48.9455
rs138915779	A	C	A	C	-1.347	0.0528	0.0035	0.0162	1	190079170	0.035	0.1315	140254	61106	outcome	3437	190079170	0.2241	2.06e-09	1	Activated CD4 regulatory T cell %CD4 regulatory T cell	prostate cancer	1.24e-08	0.0126564	44.0321
rs141066700	G	A	G	A	-0.682	-0.0006	0.0093	0.0147	1	193453479	0.0371	0.9873	140254	61106	outcome	3437	193453479	0.1241	4.18e-08	1	Activated CD4 regulatory T cell %CD4 regulatory T cell	prostate cancer	6.02e-08	0.00857085	29.6954
rs17583875	A	G	A	G	-1.532	-0.0122	0.0029	0.0252	1	197924770	0.0286	0.6697	140254	61106	outcome	3437	197924770	0.2241	9.63e-12	1	Activated CD4 regulatory T cell %CD4 regulatory T cell	prostate cancer	2.53e-11	0.0135733	47.2657
rs7530076	A	G	A	G	0.4628	-0.0022	0.9748	0.9731	1	195825276	0.0309	0.9437	140254	61106	outcome	3437	195825276	0.08043	9.52e-09	1	Activated CD4 regulatory T cell %CD4 regulatory T cell	prostate cancer	1.48e-08	0.0105228	36.5303
rs11124653	A	C	A	C	-0.1861	-0.0004	0.5907	0.6084	2	39112166	0.0083	0.9624	140254	61106	outcome	3405	39112166	0.0267	3.74e-12	2	CD25++ CD45RA+ CD4 not regulatory T cell Absolute Count	prostate cancer	6.78e-12	0.0167468	57.96
rs116517602	T	C	T	C	1.722	-0.0148	0.0041	0.012	1	198922068	0.0421	0.725301	140254	61106	outcome	3405	198922068	0.1913	3.67e-19	1	CD25++ CD45RA+ CD4 not regulatory T cell Absolute Count	prostate cancer	1.32e-18	0.0242156	84.4508
rs12712610	G	A	G	A	0.2347	-0.0188	0.2972	0.1786	2	38897249	0.0113	0.0953301	140254	61106	outcome	3405	38897249	0.02843	2.15e-16	2	CD25++ CD45RA+ CD4 not regulatory T cell Absolute Count	prostate cancer	3.47e-15	0.0230111	80.151
rs9916257	T	G	T	G	-0.1904	0.0065	0.5737	0.4305	17	33797371	0.0085	0.4467	140254	61106	outcome	1858	33797371	0.03354	1.59e-08	17	CD33- HLA DR- Absolute Count	prostate cancer	3.12e-08	0.0177323	33.5052
rs1801274	G	A	G	A	-0.5517	-0.0078	0.3334	0.5082	1	161479745	0.0082	0.3417	140254	61106	outcome	1858	161479745	0.03439	2.53e-54	1	CD33dim HLA DR+ CD11b- %CD33dim HLA DR+	prostate cancer	4.93e-54	0.13529	290.385
rs3820097	A	G	A	G	0.4291	0.0043	0.9459	0.8912	1	161049358	0.0142	0.7634	140254	61106	outcome	1858	161049358	0.07422	8.7e-09	1	CD33dim HLA DR+ CD11b- %CD33dim HLA DR+	prostate cancer	1.27e-08	0.0188447	35.6476
rs3826007	T	C	T	C	-0.3541	-0.0171	0.2209	0.2498	15	80263217	0.0095	0.0721905	140254	61106	outcome	1858	80263217	0.04034	3.71e-18	15	CD33dim HLA DR+ CD11b- %CD33dim HLA DR+	prostate cancer	2.83e-17	0.0431589	83.7161
rs3865444	A	C	A	C	-0.5183	0.0143	0.2132	0.3273	19	51727962	0.0086	0.0949992	140254	61106	outcome	1857	51727962	0.03788	1.14e-40	19	Basophil %CD33dim HLA DR- CD66b-	prostate cancer	1.13e-39	0.0901247	183.741
rs4499342	T	C	T	C	0.2541	-0.0043	0.1527	0.1586	19	8786913	0.011	0.6962	140254	61106	outcome	1857	8786913	0.04602	3.85e-08	19	Basophil %CD33dim HLA DR- CD66b-	prostate cancer	5.82e-08	0.0167077	31.5193
rs7351079	G	A	G	A	-0.2756	0.0124	0.2722	0.1731	19	51574038	0.0106	0.2408	140254	61106	outcome	1857	51574038	0.03696	1.37e-13	19	Basophil %CD33dim HLA DR- CD66b-	prostate cancer	4.63e-13	0.0300946	57.5577
rs17583875	A	G	A	G	-1.51	-0.0122	0.0029	0.0252	1	197924770	0.0286	0.6697	140254	61106	outcome	3395	197924770	0.2336	1.15e-10	1	Effector Memory CD8+ T cell Absolute Count	prostate cancer	2.83e-10	0.0131862	45.3387
rs11896593	C	G	C	G	0.2701	-0.0177	0.3707	0.2014	2	38925155	0.0106	0.0930401	140254	61106	outcome	3427	38925155	0.02208	1.04e-33	2	CD45RA+ CD8+ T cell %CD8+ T cell	prostate cancer	7.92e-32	0.0340376	120.687
rs150956189	C	T	C	T	3.098	0.0571	0.0003	0.0229	1	214625781	0.0333	0.0860201	140254	61106	outcome	3427	214625781	0.5579	3.03e-08	1	CD45RA+ CD8+ T cell %CD8+ T cell	prostate cancer	1.86e-07	0.00575684	19.8313
rs17583875	A	G	A	G	1.755	-0.0122	0.0029	0.0252	1	197924770	0.0286	0.6697	140254	61106	outcome	3427	197924770	0.1946	3.06e-19	1	CD45RA+ CD8+ T cell %CD8+ T cell	prostate cancer	1.27e-18	0.0178123	62.1137
rs2463509	T	C	T	C	-1.139	0.0276	0.9971	0.9716	2	103672986	0.0287	0.3378	140254	61106	outcome	3427	103672986	0.2039	2.52e-08	2	CD45RA+ CD8+ T cell %CD8+ T cell	prostate cancer	8.25e-08	0.00750264	25.8908
rs28578699	C	A	C	A	0.174	-0.008	0.3669	0.438	2	38899155	0.0084	0.342	140254	61106	outcome	3427	38899155	0.02238	9.93e-15	2	CD45RA+ CD8+ T cell %CD8+ T cell	prostate cancer	5.87e-14	0.0140653	48.8608
rs111902980	A	G	A	G	0.4732	0.0048	0.0193	0.0332	1	157954450	0.0237	0.8386	140254	61106	outcome	3395	157954450	0.08644	4.71e-08	1	Effector Memory CD4-CD8- T cell Absolute Count	prostate cancer	7.9e-08	0.00847643	29.0064
rs6710361	A	G	A	G	0.177	-0.0048	0.1985	0.2466	2	87047145	0.0104	0.639699	140254	61106	outcome	3395	87047145	0.03027	5.45e-09	2	Effector Memory CD4-CD8- T cell Absolute Count	prostate cancer	1.22e-08	0.00996875	34.1645
rs9896155	G	A	G	A	0.1522	-0.0193	0.6739	0.4597	17	33794697	0.0085	0.02243	140254	61106	outcome	3395	33794697	0.02556	2.84e-09	17	Effector Memory CD4-CD8- T cell Absolute Count	prostate cancer	3.32e-08	0.0101814	34.9007
rs3829793	G	C	G	C	0.1677	-0.0084	0.3147	0.3465	1	161194400	0.0084	0.3199	140254	61106	outcome	3629	161194400	0.02704	6.14e-10	1	CD14+ CD16+ monocyte %monocyte	prostate cancer	2.63e-09	0.0121304	44.5371
rs71632979	G	A	G	A	-0.7013	-0.0188	0.2479	0.1189	1	161526397	0.0135	0.1661	140254	61106	outcome	3629	161526397	0.02722	1.41e-134	1	CD14+ CD16+ monocyte %monocyte	prostate cancer	1.68e-132	0.183396	814.565
rs71639910	A	G	A	G	-0.2863	-0.014	0.0704	0.0287	1	161937774	0.0254	0.5806	140254	61106	outcome	3629	161937774	0.04872	4.58e-09	1	CD14+ CD16+ monocyte %monocyte	prostate cancer	1.17e-08	0.0107286	39.3345
rs147174426	T	A	T	A	-0.5472	-0.0105	0.1717	0.0635	1	161528012	0.0183	0.5646	140254	61106	outcome	3629	161528012	0.03158	1.12e-64	1	CD16+ monocyte %monocyte	prostate cancer	3.06e-63	0.0851687	337.665
rs74975395	T	C	T	C	0.2556	0.0668	0.081	0.0168	1	166026114	0.0341	0.0500196	140254	61106	outcome	3629	166026114	0.045	1.45e-08	1	CD16+ monocyte %monocyte	prostate cancer	1.24e-07	0.0097264	35.6242
rs73402222	C	T	C	T	0.1905	0.0036	0.3456	0.0634	6	31388449	0.0162	0.8231	140254	61106	outcome	3652	31388449	0.03406	2.39e-08	6	CD4+/CD8+ T cell	prostate cancer	4.31e-08	0.0164149	60.9141
rs77650974	A	G	A	G	-0.1502	-0.0205	0.3227	0.1964	18	12394263	0.0109	0.0592598	140254	61106	outcome	3669	12394263	0.02624	1.12e-08	18	Lymphocyte %leukocyte	prostate cancer	9.22e-08	0.00986166	36.5229
rs72845743	A	G	A	G	0.3943	-0.0397	0.415	0.1574	6	32528414	0.0118	0.000730298	140254	61106	outcome	3666	32528414	0.07059	2.49e-08	6	TCRgd T cell %lymphocyte	prostate cancer	6.73e-07	0.0754897	299.179
rs77650974	A	G	A	G	0.1512	-0.0205	0.3227	0.1964	18	12394263	0.0109	0.0592598	140254	61106	outcome	3669	12394263	0.0265	1.25e-08	18	Granulocyte %leukocyte	prostate cancer	1.02e-07	0.00999341	37.0157
rs11579717	A	G	A	G	-1.201	0.011	0.0044	0.0434	1	199999121	0.0222	0.62	140254	61106	outcome	3440	199999121	0.1771	1.42e-11	1	CD28+ CD45RA- CD8dim T cell %T cell	prostate cancer	3.91e-11	0.0126373	44.003
rs116759767	A	G	A	G	-0.9923	0.0504	0.0049	0.026	1	189981116	0.0302	0.0956093	140254	61106	outcome	3440	189981116	0.1747	1.45e-08	1	CD28+ CD45RA- CD8dim T cell %T cell	prostate cancer	9.09e-08	0.00960238	33.3331
rs146620586	T	G	T	G	-2.445	-0.0372	0.0032	0.0173	1	198524264	0.0373	0.3183	140254	61106	outcome	3440	198524264	0.2667	8.19e-20	1	CD28+ CD45RA- CD8dim T cell %T cell	prostate cancer	7.63e-19	0.0381369	136.313
rs112417310	A	G	A	G	0.5116	-0.0128	0.0201	0.0109	1	206855483	0.0423	0.7623	140254	61106	outcome	3657	206855483	0.08936	1.12e-08	1	CD19 on memory B cell	prostate cancer	2.21e-08	0.0103102	38.0765
rs138920008	C	G	C	G	-1.277	-0.0132	0.0041	0.0432	16	32422808	0.0265	0.6181	140254	61106	outcome	3657	32422808	0.2176	4.85e-09	16	CD19 on memory B cell	prostate cancer	1.17e-08	0.0133172	49.3311
rs11548656	G	A	G	A	-0.2363	-0.0247	0.1287	0.0371	16	81916912	0.023	0.2831	140254	61106	outcome	3649	81916912	0.03676	1.47e-10	16	CD25 on IgD- CD24- B cell	prostate cancer	7.16e-10	0.0125229	46.2501
rs41294937	C	T	C	T	0.3718	-0.0055	0.1073	0.0487	10	6106621	0.0185	0.767201	140254	61106	outcome	3649	6106621	0.04036	5.23e-20	10	CD25 on IgD- CD24- B cell	prostate cancer	2.04e-19	0.0264822	99.2078
rs12138291	A	G	A	G	-0.2773	0.0095	0.1482	0.235	1	166464476	0.0098	0.3318	140254	61106	outcome	2919	166464476	0.03854	7.97e-13	1	CD3 on CD39+ CD4+ T cell	prostate cancer	3.38e-12	0.019414	57.7519
rs2949661	T	C	T	C	0.644	0.0114	0.4466	0.3684	1	167424924	0.0085	0.1775	140254	61106	outcome	2919	167424924	0.02499	3.76e-132	1	CD3 on CD39+ CD4+ T cell	prostate cancer	8.1e-132	0.205003	752.195
rs4656440	G	C	G	C	-0.3594	-0.0144	0.049	0.0627	1	165218634	0.0175	0.4112	140254	61106	outcome	2919	165218634	0.06326	1.47e-08	1	CD3 on CD39+ CD4+ T cell	prostate cancer	3.92e-08	0.0120382	35.5434
rs858496	G	T	G	T	0.1732	-0.0056	0.6622	0.7068	1	167500918	0.01	0.5729	140254	61106	outcome	2919	167500918	0.02866	1.69e-09	1	CD3 on CD39+ CD4+ T cell	prostate cancer	3.91e-09	0.0134207	39.6807
rs1886730	C	T	C	T	0.2857	0.015	0.5778	0.4875	1	2488608	0.0085	0.0779202	140254	61106	outcome	1247	2488608	0.03841	1.91e-13	1	HVEM on Central Memory CD4+ T cell	prostate cancer	6.81e-13	0.0398241	51.6375
rs1886730	C	T	C	T	0.3092	0.015	0.5778	0.4875	1	2488608	0.0085	0.0779202	140254	61106	outcome	1247	2488608	0.03847	2.1e-15	1	HVEM on Central Memory CD8+ T cell	prostate cancer	8.12e-15	0.046645	60.9143
rs10919544	C	T	C	T	-0.2555	-0.0155	0.5475	0.3253	1	161508763	0.0092	0.0929202	140254	61106	outcome	3113	161508763	0.02745	2.4e-20	1	CD16-CD56 on Natural Killer	prostate cancer	4.9e-19	0.0323455	103.991
rs111579151	T	C	T	C	-0.5632	-0.0193	0.0323	0.0378	11	111848073	0.0232	0.4051	140254	61106	outcome	3113	111848073	0.07427	4.45e-14	11	CD16-CD56 on Natural Killer	prostate cancer	1.93e-13	0.0198289	62.9356
rs11214436	T	G	T	G	0.3221	-0.0072	0.3055	0.4055	11	112830782	0.0083	0.3831	140254	61106	outcome	3113	112830782	0.02878	1.59e-28	11	CD16-CD56 on Natural Killer	prostate cancer	1.65e-27	0.0440245	143.268
rs117533070	T	C	T	C	0.2856	-0.0535	0.0816	0.0129	11	112710664	0.0418	0.2003	140254	61106	outcome	3113	112710664	0.04932	7.71e-09	11	CD16-CD56 on Natural Killer	prostate cancer	3.24e-08	0.0122256	38.5044
rs148849191	T	C	T	C	-0.7822	-0.0366	0.0124	0.0184	11	113153223	0.0324	0.2576	140254	61106	outcome	3113	113153223	0.1208	1.11e-10	11	CD16-CD56 on Natural Killer	prostate cancer	4.88e-10	0.0149854	47.3288
rs17504675	A	G	A	G	-0.4696	0.0194	0.0308	0.0259	11	110737507	0.0271	0.4753	140254	61106	outcome	3113	110737507	0.07632	8.59e-10	11	CD16-CD56 on Natural Killer	prostate cancer	2.41e-09	0.0131659	41.5055
rs77291736	T	C	T	C	-1.076	-0.0031	0.1086	0.0318	11	112749800	0.0259	0.9054	140254	61106	outcome	3113	112749800	0.03832	6.93e-155	11	CD16-CD56 on Natural Killer	prostate cancer	5.44e-157	0.224159	898.844
rs62184016	C	T	C	T	-0.4171	0.0089	0.1986	0.1704	2	204623481	0.011	0.4167	140254	61106	outcome	2920	204623481	0.03444	5.77e-33	2	CD28 on CD45RA+ CD4+ T cell	prostate cancer	5.5e-32	0.0553782	171.067
rs72928038	A	G	A	G	0.3653	-0.0015	0.199	0.1658	6	90976768	0.0119	0.9004	140254	61106	outcome	2920	90976768	0.03405	2.25e-26	6	CD28 on CD45RA+ CD4+ T cell	prostate cancer	6.28e-26	0.0425417	129.652
rs10882701	C	A	C	A	-0.1597	-0.0017	0.5156	0.5719	10	97741071	0.009	0.8465	140254	61106	outcome	2920	97741071	0.02758	7.66e-09	10	CD28 on CD39+ CD4+ T cell	prostate cancer	1.25e-08	0.0127396	37.6539
rs117458836	A	G	A	G	0.6927	-0.0367	0.0187	0.0132	10	96773382	0.0387	0.3426	140254	61106	outcome	2920	96773382	0.1041	3.45e-11	10	CD28 on CD39+ CD4+ T cell	prostate cancer	1.25e-10	0.0176102	52.3077
rs12778618	C	T	C	T	0.5196	0.1223	0.0457	0.0151	10	95633120	0.0395	0.001942	140254	61106	outcome	2920	95633120	0.06591	4.44e-15	10	CD28 on CD39+ CD4+ T cell	prostate cancer	2.27e-13	0.0235488	70.3727
rs7084635	G	A	G	A	0.168	0.0124	0.7288	0.5883	10	97062753	0.0092	0.1794	140254	61106	outcome	2920	97062753	0.03066	4.61e-08	10	CD28 on CD39+ CD4+ T cell	prostate cancer	1.78e-07	0.011157	32.9234
rs7426056	G	A	G	A	0.3005	0.003	0.5717	0.7606	2	204612058	0.0097	0.757801	140254	61106	outcome	2920	204612058	0.02793	1.67e-26	2	CD28 on CD39+ CD4+ T cell	prostate cancer	6.04e-26	0.0442217	135.009
rs1973872	G	T	G	T	0.3858	-0.0032	0.601	0.7312	2	204631016	0.0094	0.735201	140254	61106	outcome	2920	204631016	0.02783	2.24e-42	2	CD28 on CD28+ CD4+ T cell	prostate cancer	1.14e-41	0.0713842	224.311
rs72928038	A	G	A	G	0.2512	-0.0015	0.199	0.1658	6	90976768	0.0119	0.9004	140254	61106	outcome	2920	90976768	0.03397	1.84e-13	6	CD28 on CD28+ CD4+ T cell	prostate cancer	3.41e-13	0.0201166	59.9054
rs71632979	G	A	G	A	0.5196	-0.0188	0.2454	0.1189	1	161526397	0.0135	0.1661	140254	61106	outcome	2871	161526397	0.031	3.13e-60	1	CD86 on myeloid Dendritic Cell	prostate cancer	1.5e-58	0.0999907	318.745
rs66570838	A	T	A	T	-0.3173	-0.0287	0.1051	0.1291	5	35840724	0.0119	0.0156099	140254	61106	outcome	2920	35840724	0.04155	3e-14	5	CD127 on CD28+ CD45RA+ CD8+ T cell	prostate cancer	6.58e-13	0.0189386	56.3296
rs11567754	A	T	A	T	-0.2975	-0.0318	0.105	0.1357	5	35872190	0.0116	0.00617803	140254	61106	outcome	2920	35872190	0.04334	8.08e-12	5	CD127 on CD45RA+ CD4+ T cell	prostate cancer	1.73e-10	0.0166348	49.3613
rs1573735	T	C	T	C	-0.2069	0.0107	0.3262	0.5435	16	423696	0.0085	0.2053	140254	61106	outcome	2920	423696	0.02839	4.02e-13	16	CD127 on CD45RA+ CD4+ T cell	prostate cancer	2.37e-12	0.0188177	55.9631
rs6681289	A	G	A	G	-0.186	0.0014	0.1884	0.133	1	119421209	0.0122	0.9062	140254	61106	outcome	3118	119421209	0.03337	2.73e-08	1	CD25 on CD39+ resting CD4 regulatory T cell	prostate cancer	4.11e-08	0.0105798	33.3193
rs111695695	A	C	A	C	-0.5128	0.0086	0.0772	0.0314	19	51897760	0.0303	0.7772	140254	61106	outcome	1554	51897760	0.06836	1.06e-13	19	CD33 on Immature Myeloid-Derived Suppressor Cells	prostate cancer	1.54e-13	0.0374672	60.4125
rs58483275	T	C	T	C	0.5046	-0.0653	0.0734	0.0111	19	51868443	0.0475	0.1696	140254	61106	outcome	1554	51868443	0.07256	5.21e-12	19	CD33 on Immature Myeloid-Derived Suppressor Cells	prostate cancer	1.64e-11	0.0346348	55.6818
rs7245846	A	G	A	G	-1.115	0.0124	0.1934	0.3534	19	51731176	0.0085	0.1466	140254	61106	outcome	1554	51731176	0.0393	6.08e-143	19	CD33 on Immature Myeloid-Derived Suppressor Cells	prostate cancer	1.2e-149	0.387877	983.44
rs7351079	G	A	G	A	-0.3351	0.0124	0.258	0.1731	19	51574038	0.0106	0.2408	140254	61106	outcome	1554	51574038	0.0424	5.07e-15	19	CD33 on Immature Myeloid-Derived Suppressor Cells	prostate cancer	1.55e-14	0.0429935	69.7235
rs75773078	A	G	A	G	-0.5252	-0.0102	0.0705	0.0762	19	51742145	0.0154	0.5076	140254	61106	outcome	1554	51742145	0.07057	1.64e-13	19	CD33 on Immature Myeloid-Derived Suppressor Cells	prostate cancer	3.18e-13	0.0361508	58.2104
rs79377141	A	G	A	G	0.3376	0.008	0.2008	0.0938	19	51538952	0.0146	0.5824	140254	61106	outcome	1554	51538952	0.0459	3.07e-13	19	CD33 on Immature Myeloid-Derived Suppressor Cells	prostate cancer	5.46e-13	0.0365809	58.9292
rs6453485	T	C	T	C	0.3322	0.007	0.0997	0.2471	5	79151752	0.0094	0.4569	140254	61106	outcome	1570	79151752	0.06048	4.64e-08	5	CD14 on Monocytic Myeloid-Derived Suppressor Cells	prostate cancer	8.1e-08	0.0198112	31.6919
rs1801274	G	A	G	A	-0.3379	-0.0078	0.3302	0.5082	1	161479745	0.0082	0.3417	140254	61106	outcome	1634	161479745	0.03798	1.47e-18	1	CD14 on CD33dim HLA DR+ CD11b+	prostate cancer	4.29e-18	0.0505043	86.8072
rs139795227	C	A	C	A	-0.5867	0.0103	0.0479	0.021	1	92842367	0.0316	0.745399	140254	61106	outcome	2871	92842367	0.06432	1.36e-19	1	CD80 on CD62L+ myeloid Dendritic Cell	prostate cancer	3.93e-19	0.0313964	92.9961
rs6445484	G	A	G	A	0.4659	0.0023	0.8964	0.9486	3	52503800	0.0182	0.8987	140254	61106	outcome	2871	52503800	0.04526	1.96e-24	3	CD80 on CD62L+ myeloid Dendritic Cell	prostate cancer	5.05e-24	0.040316	120.526
rs11615628	A	G	A	G	-0.2032	0.0124	0.2466	0.2929	12	6903631	0.0096	0.1981	140254	61106	outcome	2920	6903631	0.03171	1.71e-10	12	CD4 on CD28+ CD4+ T cell	prostate cancer	8.14e-10	0.0153425	45.467
rs2844608	T	C	T	C	0.1884	0.0087	0.4572	0.3855	6	31247414	0.0081	0.2874	140254	61106	outcome	2920	31247414	0.03065	9.04e-10	6	CD4 on CD28+ CD4+ T cell	prostate cancer	3.29e-09	0.0176172	52.329
rs61802329	T	C	T	C	0.1669	-0.0006	0.4673	0.4937	1	161589626	0.0091	0.9469	140254	61106	outcome	2872	161589626	0.02718	9.48e-10	1	CD11c on myeloid Dendritic Cell	prostate cancer	1.4e-09	0.0138682	40.3616
rs67898294	T	C	T	C	0.3276	-0.0081	0.3505	0.1658	16	31362711	0.011	0.4619	140254	61106	outcome	2872	31362711	0.02803	7.19e-31	16	CD11c on myeloid Dendritic Cell	prostate cancer	5.66e-30	0.0488635	147.443
rs75841521	A	G	A	G	-0.442	-0.0046	0.028	0.0156	2	59592691	0.0376	0.9036	140254	61106	outcome	2872	59592691	0.08067	4.65e-08	2	CD11c on myeloid Dendritic Cell	prostate cancer	6.81e-08	0.0106341	30.8478
rs78520150	A	C	A	C	0.3947	-0.0002	0.0376	0.0228	1	19786101	0.0302	0.995	140254	61106	outcome	2872	19786101	0.07143	3.57e-08	1	CD11c on myeloid Dendritic Cell	prostate cancer	4.8e-08	0.0112748	32.7276
rs79298699	T	C	T	C	-0.279	-0.0197	0.0825	0.0737	16	31402042	0.017	0.2444	140254	61106	outcome	2872	31402042	0.04807	7.22e-09	16	CD11c on myeloid Dendritic Cell	prostate cancer	2.56e-08	0.0117842	34.2238
rs147258092	T	C	T	C	-0.3132	-0.019	0.0719	0.0646	16	31624520	0.0184	0.3012	140254	61106	outcome	2872	31624520	0.05248	2.69e-09	16	CD11c on CD62L+ myeloid Dendritic Cell	prostate cancer	9e-09	0.0130917	38.0717
rs4493054	A	G	A	G	0.3611	0.0226	0.7366	0.6785	16	31361988	0.0086	0.00842908	140254	61106	outcome	2872	31361988	0.02998	1.22e-32	16	CD11c on CD62L+ myeloid Dendritic Cell	prostate cancer	2.32e-30	0.0505979	152.955
rs1801274	G	A	G	A	0.2755	-0.0078	0.3209	0.5082	1	161479745	0.0082	0.3417	140254	61106	outcome	2850	161479745	0.02934	1.2e-20	1	CD11c on monocyte	prostate cancer	8.02e-20	0.0330808	97.4376
rs9932817	G	T	G	T	-0.1683	-0.0058	0.3825	0.4724	16	48503912	0.0083	0.4866	140254	61106	outcome	2850	48503912	0.02845	3.73e-09	16	CD11c on monocyte	prostate cancer	9.19e-09	0.0133803	38.624
rs116007826	G	A	G	A	0.8001	0.0366	0.0686	0.0061	6	31569745	0.0563	0.5162	140254	61106	outcome	2872	31569745	0.06015	3.14e-39	6	HLA DR on myeloid Dendritic Cell	prostate cancer	2.62e-38	0.0818048	255.697
rs2858885	T	C	T	C	-0.3187	-0.0043	0.5362	0.4142	6	32699782	0.0081	0.595899	140254	61106	outcome	2872	32699782	0.0308	1.13e-24	6	HLA DR on myeloid Dendritic Cell	prostate cancer	5.33e-24	0.0505186	152.703
rs29221	G	C	G	C	0.3075	0.0051	0.1555	0.2569	6	29589124	0.0094	0.585	140254	61106	outcome	2872	29589124	0.04061	4.99e-14	6	HLA DR on myeloid Dendritic Cell	prostate cancer	1.44e-13	0.0248342	73.0893
rs55971447	T	C	T	C	-0.4802	-0.0202	0.2371	0.1176	1	161515326	0.0134	0.1325	140254	61106	outcome	2872	161515326	0.03135	5.94e-51	1	HLA DR on myeloid Dendritic Cell	prostate cancer	3.18e-49	0.0834206	261.207
rs6925683	G	T	G	T	0.2917	0.0028	0.1238	0.2363	6	33894292	0.0101	0.7798	140254	61106	outcome	2872	33894292	0.04331	1.95e-11	6	HLA DR on myeloid Dendritic Cell	prostate cancer	3.86e-11	0.0184598	53.976
rs9267650	T	A	T	A	-0.2465	-0.006	0.2881	0.0453	6	31824912	0.0191	0.752	140254	61106	outcome	2872	31824912	0.03657	1.92e-11	6	HLA DR on myeloid Dendritic Cell	prostate cancer	3.86e-11	0.0249245	73.3618
rs12449199	G	T	G	T	-0.1674	-0.0041	0.3064	0.3022	16	10968440	0.0093	0.655901	140254	61106	outcome	3060	10968440	0.02775	1.83e-09	16	HLA DR on HLA DR+ CD4+ T cell	prostate cancer	3.85e-09	0.0119107	36.8621
rs17583875	A	G	A	G	1.651	-0.0122	0.0029	0.0252	1	197924770	0.0286	0.6697	140254	61106	outcome	6.94225e-15	197924770	0.2111	3405	1	Resting CD4 regulatory T cell Absolute Count	prostate cancer	2.20566e-14	0.0157638	54.5034
rs408686	A	C	A	C	-0.2089	0.0057	0.814	0.9181	2	39177320	0.0157	0.716401	140254	61106	outcome	1.33291e-11	39177320	0.03078	3405	2	Resting CD4 regulatory T cell Absolute Count	prostate cancer	3.26403e-11	0.0132143	45.5705
rs6751481	C	T	C	T	0.2177	-0.0051	0.4699	0.5181	2	38897810	0.0083	0.5413	140254	61106	outcome	3.10099e-20	38897810	0.02348	3405	2	Resting CD4 regulatory T cell Absolute Count	prostate cancer	1.76059e-19	0.0236108	82.2904
rs75958070	C	G	C	G	-0.2006	-0.0025	0.1217	0.1233	11	79203049	0.0126	0.8447	140254	61106	outcome	3.01801e-08	79203049	0.03612	3405	11	Resting CD4 regulatory T cell Absolute Count	prostate cancer	5.09509e-08	0.00860251	29.5284
rs10882701	C	A	C	A	-0.3551	-0.0017	0.514	0.5719	10	97741071	0.009	0.8465	140254	61106	outcome	7.11541e-46	97741071	0.0246	3405	10	CD39+ resting CD4 regulatory T cell Absolute Count	prostate cancer	4.36435e-45	0.0629986	228.798
rs11188245	A	G	A	G	0.1845	-0.0118	0.3844	0.3926	10	96999046	0.0083	0.1519	140254	61106	outcome	1.77296e-12	96999046	0.02607	3405	10	CD39+ resting CD4 regulatory T cell Absolute Count	prostate cancer	1.41902e-11	0.0161103	55.7212
rs11188757	C	A	C	A	-0.1737	0.0069	0.2213	0.2947	10	98205222	0.009	0.443	140254	61106	outcome	1.77599e-08	98205222	0.03077	3405	10	CD39+ resting CD4 regulatory T cell Absolute Count	prostate cancer	5.0258e-08	0.0103988	35.7588
rs11890666	A	G	A	G	-0.1566	-0.0057	0.2875	0.2085	2	38745822	0.01	0.568801	140254	61106	outcome	2.88403e-08	38745822	0.02815	3405	2	CD39+ resting CD4 regulatory T cell Absolute Count	prostate cancer	6.66531e-08	0.010047	34.5369
rs12712610	G	A	G	A	0.1912	-0.0188	0.2972	0.1786	2	38897249	0.0113	0.0953301	140254	61106	outcome	4.16486e-12	38897249	0.02749	3405	2	CD39+ resting CD4 regulatory T cell Absolute Count	prostate cancer	4.13406e-11	0.0152717	52.7754
rs17583875	A	G	A	G	2.134	-0.0122	0.0029	0.0252	1	197924770	0.0286	0.6697	140254	61106	outcome	2.16721e-21	197924770	0.2233	3405	1	CD39+ resting CD4 regulatory T cell Absolute Count	prostate cancer	1.01901e-20	0.0263363	92.0468
rs1923692	G	T	G	T	-0.5138	0.0217	0.9457	0.9767	10	98173715	0.0325	0.5047	140254	61106	outcome	1.66303e-21	98173715	0.05359	3405	10	CD39+ resting CD4 regulatory T cell Absolute Count	prostate cancer	1.0878e-20	0.0271126	94.8355
rs192831774	T	A	T	A	0.4945	-0.0194	0.0311	0.0099	10	95387682	0.0536	0.7173	140254	61106	outcome	1.00392e-11	95387682	0.0724	3405	10	CD39+ resting CD4 regulatory T cell Absolute Count	prostate cancer	2.4432e-11	0.0147368	50.8993
rs72809757	G	A	G	A	0.4827	0.0229	0.0586	0.0246	10	97285715	0.0262	0.3819	140254	61106	outcome	1.9391e-19	97285715	0.05321	3405	10	CD39+ resting CD4 regulatory T cell Absolute Count	prostate cancer	1.46941e-18	0.0257073	89.7902
rs10786199	A	G	A	G	-0.1932	-0.0019	0.2894	0.4001	10	97069472	0.0083	0.8149	140254	61106	outcome	3.39313e-11	97069472	0.02906	3405	10	CD39+ secreting CD4 regulatory T cell Absolute Count	prostate cancer	7.08767e-11	0.0153521	53.0578
rs10882701	C	A	C	A	-0.4069	-0.0017	0.514	0.5719	10	97741071	0.009	0.8465	140254	61106	outcome	3.19374e-56	97741071	0.02528	3405	10	CD39+ secreting CD4 regulatory T cell Absolute Count	prostate cancer	2.15783e-55	0.0827189	306.877
rs11188757	C	A	C	A	-0.2549	0.0069	0.2213	0.2947	10	98205222	0.009	0.443	140254	61106	outcome	1.32801e-15	98205222	0.03174	3405	10	CD39+ secreting CD4 regulatory T cell Absolute Count	prostate cancer	6.63682e-15	0.0223935	77.9505
rs72809762	T	C	T	C	0.4322	0.0026	0.0675	0.0354	10	97294154	0.0221	0.905	140254	61106	outcome	4.98196e-17	97294154	0.05126	3405	10	CD39+ secreting CD4 regulatory T cell Absolute Count	prostate cancer	1.20083e-16	0.0235154	81.9499
rs7914286	A	G	A	G	0.9765	0.0089	0.4258	0.4942	10	97565783	0.0081	0.2707	140254	61106	outcome	1e-200	97565783	0.02064	3405	10	CD39+ secreting CD4 regulatory T cell Absolute Count	prostate cancer	0	0.466276	2972.96
rs185048341	A	G	A	G	-0.6561	-0.0446	0.0175	0.0099	9	107953420	0.0461	0.3335	140254	61106	outcome	3.82904e-08	107953420	0.1188	1858	9	CD33dim HLA DR+ CD11b- Absolute Count	prostate cancer	8.33893e-08	0.0148027	27.8866
rs67760360	A	G	A	G	-0.3414	-0.0182	0.2209	0.2475	15	80260872	0.0096	0.0565705	140254	61106	outcome	2.20191e-19	80260872	0.0375	1858	15	CD33dim HLA DR+ CD11b- Absolute Count	prostate cancer	1.96352e-18	0.0401186	77.5722
rs146620586	T	G	T	G	-1.951	-0.0372	0.0032	0.0173	1	198524264	0.0373	0.3183	140254	61106	outcome	1.90283e-11	198524264	0.2896	3395	1	Effector Memory CD4+ T cell Absolute Count	prostate cancer	8.70562e-11	0.024283	84.4428
rs113243185	C	G	C	G	0.2773	-0.0176	0.1996	0.1294	6	32585071	0.012	0.1439	140254	61106	outcome	2.87607e-14	32585071	0.03632	3427	6	Terminally Differentiated CD4+ T cell %CD4+ T cell	prostate cancer	2.99461e-13	0.0245696	86.2704
rs113435341	G	A	G	A	1.234	-0.0424	0.0032	0.0194	1	198151688	0.0318	0.1815	140254	61106	outcome	3.64603e-08	198151688	0.2235	3427	1	Terminally Differentiated CD4+ T cell %CD4+ T cell	prostate cancer	1.60247e-07	0.00971445	33.5984
rs62400929	G	A	G	A	0.307	-0.0635	0.1087	0.013	6	31159546	0.0355	0.0731897	140254	61106	outcome	1.37199e-10	31159546	0.04769	3427	6	Terminally Differentiated CD4+ T cell %CD4+ T cell	prostate cancer	1.27574e-09	0.0182625	63.7126
rs9271536	T	A	T	A	-0.2806	-0.0183	0.7798	0.8057	6	32589978	0.01	0.0688002	140254	61106	outcome	7.9378e-17	32589978	0.03351	3427	6	Terminally Differentiated CD4+ T cell %CD4+ T cell	prostate cancer	1.69883e-15	0.0270399	95.1856
rs11896593	C	G	C	G	-0.2549	-0.0177	0.3707	0.2014	2	38925155	0.0106	0.0930401	140254	61106	outcome	2.38891e-30	38925155	0.02205	3427	2	Effector Memory CD8+ T cell %CD8+ T cell	prostate cancer	1.41735e-28	0.0303145	107.073
rs17583875	A	G	A	G	-1.619	-0.0122	0.0029	0.0252	1	197924770	0.0286	0.6697	140254	61106	outcome	1.13789e-16	197924770	0.1943	3427	1	Effector Memory CD8+ T cell %CD8+ T cell	prostate cancer	4.01943e-16	0.0151586	52.7175
rs2463509	T	C	T	C	1.154	0.0276	0.9971	0.9716	2	103672986	0.0287	0.3378	140254	61106	outcome	1.457e-08	103672986	0.2032	3427	2	Effector Memory CD8+ T cell %CD8+ T cell	prostate cancer	4.95243e-08	0.00770155	26.5825
rs28578699	C	A	C	A	-0.16	-0.008	0.3669	0.438	2	38899155	0.0084	0.342	140254	61106	outcome	9.44496e-13	38899155	0.02234	3427	2	Effector Memory CD8+ T cell %CD8+ T cell	prostate cancer	4.82652e-12	0.011893	41.2237
rs17583875	A	G	A	G	-1.502	-0.0122	0.0029	0.0252	1	197924770	0.0286	0.6697	140254	61106	outcome	1.56315e-11	197924770	0.2221	3427	1	Effector Memory CD8+ T cell %T cell	prostate cancer	4.11036e-11	0.0130469	45.2763
rs113500908	T	C	T	C	0.3476	0.0042	0.0449	0.0394	6	100774499	0.0229	0.8549	140254	61106	outcome	2.83498e-09	100774499	0.05835	3427	6	Effector Memory CD4-CD8- T cell %T cell	prostate cancer	5.02159e-09	0.010363	35.8649
rs13210358	T	C	T	C	0.4707	0.0125	0.0312	0.0167	6	102272234	0.0411	0.760599	140254	61106	outcome	4.23545e-11	102272234	0.07114	3427	6	Effector Memory CD4-CD8- T cell %T cell	prostate cancer	9.4521e-11	0.0133939	46.4969
rs34546581	A	G	A	G	0.2019	-0.0031	0.1923	0.2409	2	87021659	0.0104	0.7615	140254	61106	outcome	5.06058e-11	87021659	0.03063	3427	2	Effector Memory CD4-CD8- T cell %T cell	prostate cancer	1.10454e-10	0.0126629	43.9266
rs147174426	T	A	T	A	-0.4648	-0.0105	0.1717	0.0635	1	161528012	0.0183	0.5646	140254	61106	outcome	4.05882e-46	161528012	0.03214	3629	1	CD14- CD16+ monocyte Absolute Count	prostate cancer	7.53982e-45	0.0614498	237.471
rs144126567	G	C	G	C	0.3274	-0.0143	0.1737	0.0714	1	161510516	0.017	0.4022	140254	61106	outcome	9.29394e-24	161510516	0.03235	3629	1	CD14- CD16- Absolute Count	prostate cancer	1.01101e-22	0.0307698	115.145
rs1800973	A	C	A	C	0.3084	-0.0181	0.0798	0.0717	12	69744014	0.0175	0.2999	140254	61106	outcome	6.7936e-12	69744014	0.0448	3629	12	CD14- CD16- Absolute Count	prostate cancer	3.67088e-11	0.0139683	51.3808
rs1084560	G	A	G	A	-0.1328	0.0026	0.5726	0.672	16	10824872	0.0094	0.7807	140254	61106	outcome	9.71091e-09	10824872	0.02309	3596	16	HLA DR+ T cell%T cell	prostate cancer	1.84497e-08	0.00863201	31.2936
rs3087456	A	G	A	G	-0.4611	0.0012	0.7661	0.7348	16	10970902	0.0096	0.897	140254	61106	outcome	3.08177e-70	10970902	0.02546	3596	16	HLA DR+ T cell%T cell	prostate cancer	2.4841e-69	0.0761967	296.438
rs3104414	A	G	A	G	0.1693	0.0181	0.3813	0.3384	6	32582612	0.0084	0.0309599	140254	61106	outcome	9.31408e-09	32582612	0.0294	3596	6	HLA DR+ T cell%T cell	prostate cancer	9.49755e-08	0.0135236	49.27
rs7032773	T	C	T	C	-0.1471	-0.0055	0.4182	0.4486	9	117645562	0.0082	0.5029	140254	61106	outcome	1.45898e-09	117645562	0.02426	3596	9	HLA DR+ T cell%T cell	prostate cancer	4.35078e-09	0.0105296	38.2462
rs11954223	A	G	A	G	-2.093	-0.0038	0.001	0.0212	5	67413499	0.0307	0.9026	140254	61106	outcome	9.93002e-09	67413499	0.3644	3669	5	Natural Killer %CD3- lymphocyte	prostate cancer	1.69e-08	0.00875254	32.379
rs12874404	G	A	G	A	-0.1456	-0.0188	0.319	0.0595	13	108993494	0.0193	0.3308	140254	61106	outcome	1.60398e-08	108993494	0.02572	3669	13	Natural Killer %CD3- lymphocyte	prostate cancer	5.82596e-08	0.00921066	34.0895
rs183053322	T	C	T	C	-0.4163	0.0052	0.0354	0.0124	1	25076059	0.0443	0.9059	140254	61106	outcome	3.35097e-10	25076059	0.06609	3669	1	Natural Killer %CD3- lymphocyte	prostate cancer	6.11253e-10	0.0118357	43.9213
rs7218011	G	A	G	A	0.1822	-0.002	0.1634	0.189	17	33773022	0.0106	0.8528	140254	61106	outcome	1.741e-08	33773022	0.03225	3669	17	Natural Killer %CD3- lymphocyte	prostate cancer	3.05492e-08	0.00907605	33.5867
rs9916257	T	G	T	G	-0.1909	0.0065	0.5685	0.4305	17	33797371	0.0085	0.4467	140254	61106	outcome	1.21088e-15	33797371	0.02375	3669	17	Natural Killer %CD3- lymphocyte	prostate cancer	6.77478e-15	0.0178794	66.7574
rs115805162	T	C	T	C	0.2697	-0.0042	0.2076	0.0657	1	161410253	0.0172	0.8093	140254	61106	outcome	1.62218e-17	161410253	0.0315	3596	1	HLA DR+ Natural Killer %CD3- lymphocyte	prostate cancer	5.02738e-17	0.0239312	88.1173
rs3933769	G	A	G	A	0.1562	0.0046	0.6143	0.7568	1	161559327	0.0111	0.6742	140254	61106	outcome	6.86705e-09	161559327	0.0269	3596	1	HLA DR+ Natural Killer %CD3- lymphocyte	prostate cancer	1.52709e-08	0.0115617	42.0388
rs509749	G	A	G	A	-0.1613	0.0012	0.4066	0.4531	1	160793560	0.0088	0.8878	140254	61106	outcome	4.80098e-10	160793560	0.02585	3596	1	HLA DR+ Natural Killer %CD3- lymphocyte	prostate cancer	8.90223e-10	0.0125549	45.6961
rs71632979	G	A	G	A	-0.7124	-0.0188	0.2474	0.1189	1	161526397	0.0135	0.1661	140254	61106	outcome	9.977e-142	161526397	0.02686	3596	1	HLA DR+ Natural Killer %CD3- lymphocyte	prostate cancer	6.82063e-140	0.188991	837.518
rs111953852	G	A	G	A	137.6	0.0304	0.0025	0.0175	14	84194540	0.0351	0.3867	140254	61106	outcome	1.821e-08	84194540	24.38	3408	14	CD45RA- CD28- CD8+ T cell Absolute Count	prostate cancer	5.51455e-08	94.4321	-3442.45
rs111978771	C	T	C	T	123.8	-0.0034	0.0043	0.0201	1	21025910	0.0359	0.9235	140254	61106	outcome	3.21403e-10	21025910	19.64	3408	1	CD45RA- CD28- CD8+ T cell Absolute Count	prostate cancer	5.61873e-10	131.241	-3432.15
rs112362737	G	T	G	T	278.5	-0.0329	0.0012	0.0171	19	24522507	0.0497	0.508401	140254	61106	outcome	1.0361e-11	24522507	40.8	3408	19	CD45RA- CD28- CD8+ T cell Absolute Count	prostate cancer	3.43942e-11	185.926	-3424.42
rs112568609	T	C	T	C	87.63	-0.0519	0.0076	0.0217	15	27818525	0.0312	0.0959202	140254	61106	outcome	9.60196e-09	27818525	15.24	3408	15	CD45RA- CD28- CD8+ T cell Absolute Count	prostate cancer	6.11641e-08	115.834	-3435.66
rs112839187	A	G	A	G	444.1	0.0737	0.0003	0.011	2	238422350	0.0475	0.1208	140254	61106	outcome	7.31493e-09	238422350	76.59	3408	2	CD45RA- CD28- CD8+ T cell Absolute Count	prostate cancer	4.24895e-08	118.299	-3435.04
rs112857714	T	C	T	C	286.9	-0.0334	0.0009	0.012	6	148462118	0.0414	0.4193	140254	61106	outcome	2.84302e-10	148462118	45.35	3408	6	CD45RA- CD28- CD8+ T cell Absolute Count	prostate cancer	9.7392e-10	148.028	-3429.17
rs113432575	T	C	T	C	345.8	0.0262	0.0006	0.0124	21	30128360	0.0379	0.4894	140254	61106	outcome	1.48201e-09	30128360	57.03	3408	21	CD45RA- CD28- CD8+ T cell Absolute Count	prostate cancer	4.27586e-09	143.407	-3429.92
rs113819655	T	C	T	C	442.7	-0.0097	0.0004	0.0133	13	100586942	0.0446	0.8279	140254	61106	outcome	3.90301e-12	100586942	63.56	3408	13	CD45RA- CD28- CD8+ T cell Absolute Count	prostate cancer	8.41439e-12	156.724	-3427.87
rs114216104	T	C	T	C	591	0.0283	0.0001	0.0174	5	140131486	0.036	0.4319	140254	61106	outcome	1.16001e-09	140131486	96.85	3408	5	CD45RA- CD28- CD8+ T cell Absolute Count	prostate cancer	3.71012e-09	69.8492	-3455.47
rs114507999	A	G	A	G	176.7	-0.0543	0.0022	0.0204	1	21892266	0.0299	0.0695296	140254	61106	outcome	1.91902e-09	21892266	29.35	3408	1	CD45RA- CD28- CD8+ T cell Absolute Count	prostate cancer	1.53412e-08	137.078	-3431.03
rs114801643	A	C	A	C	436	0.0328	0.0003	0.0214	6	66316172	0.0291	0.2593	140254	61106	outcome	6.72295e-09	66316172	75.02	3408	6	CD45RA- CD28- CD8+ T cell Absolute Count	prostate cancer	2.71834e-08	114.023	-3436.14
rs115379408	A	G	A	G	450.6	0.0566	0.0003	0.0137	6	18617129	0.0368	0.124	140254	61106	outcome	7.79202e-09	18617129	77.86	3408	6	CD45RA- CD28- CD8+ T cell Absolute Count	prostate cancer	4.4661e-08	121.788	-3434.2
rs115485721	A	T	A	T	69.53	0.0285	0.0139	0.062	6	65783601	0.0181	0.1155	140254	61106	outcome	1.86801e-09	65783601	11.54	3408	6	CD45RA- CD28- CD8+ T cell Absolute Count	prostate cancer	1.20171e-08	132.529	-3431.9
rs115546994	T	A	T	A	383.2	0.0353	0.0004	0.009	5	159062854	0.0584	0.5451	140254	61106	outcome	7.72147e-11	159062854	58.71	3408	5	CD45RA- CD28- CD8+ T cell Absolute Count	prostate cancer	2.27085e-10	117.427	-3435.25
rs115879183	G	A	G	A	281.9	-0.0191	0.0009	0.0167	3	194347376	0.0469	0.683701	140254	61106	outcome	5.10305e-10	194347376	45.23	3408	3	CD45RA- CD28- CD8+ T cell Absolute Count	prostate cancer	1.17928e-09	142.913	-3430
rs115954619	A	G	A	G	213	0.0453	0.0015	0.0141	2	174896997	0.0383	0.237	140254	61106	outcome	7.23003e-09	174896997	36.73	3408	2	CD45RA- CD28- CD8+ T cell Absolute Count	prostate cancer	3.06618e-08	135.903	-3431.25
rs116581718	C	T	C	T	384.3	-0.0104	0.0006	0.0186	5	29413612	0.0316	0.741	140254	61106	outcome	4.1419e-11	29413612	58.05	3408	5	CD45RA- CD28- CD8+ T cell Absolute Count	prostate cancer	9.44028e-11	177.117	-3425.34
rs116876186	C	T	C	T	647.9	-0.0116	0.0001	0.0118	17	16446446	0.0394	0.7694	140254	61106	outcome	6.57052e-11	16446446	98.9	3408	17	CD45RA- CD28- CD8+ T cell Absolute Count	prostate cancer	1.42528e-10	83.9465	-3447.06
rs116941636	A	G	A	G	210.2	0.0306	0.0019	0.0092	16	79757046	0.0501	0.541101	140254	61106	outcome	3.44191e-12	79757046	30.1	3408	16	CD45RA- CD28- CD8+ T cell Absolute Count	prostate cancer	1.13128e-11	167.58	-3426.45
rs116959045	G	T	G	T	172.7	-0.0168	0.0022	0.0122	8	53929771	0.0378	0.6566	140254	61106	outcome	1.118e-09	53929771	28.26	3408	8	CD45RA- CD28- CD8+ T cell Absolute Count	prostate cancer	2.55402e-09	130.943	-3432.21
rs117036387	G	A	G	A	84.27	-0.0105	0.0075	0.023	20	3521072	0.0294	0.722	140254	61106	outcome	4.03701e-08	3521072	15.32	3408	20	CD45RA- CD28- CD8+ T cell Absolute Count	prostate cancer	7.81813e-08	105.723	-3438.52
rs117048727	T	C	T	C	368.8	-0.0165	0.0004	0.0106	13	44264686	0.045	0.7147	140254	61106	outcome	2.585e-08	44264686	66.09	3408	13	CD45RA- CD28- CD8+ T cell Absolute Count	prostate cancer	5.09068e-08	108.767	-3437.61
rs117196114	A	G	A	G	201.5	0.0211	0.0018	0.0394	9	83853182	0.0223	0.3431	140254	61106	outcome	4.10696e-10	83853182	32.14	3408	9	CD45RA- CD28- CD8+ T cell Absolute Count	prostate cancer	1.57719e-09	145.905	-3429.51
rs117262195	T	C	T	C	270.5	-0.0193	0.0013	0.0094	16	5991815	0.0523	0.7117	140254	61106	outcome	1.5531e-11	5991815	39.98	3408	16	CD45RA- CD28- CD8+ T cell Absolute Count	prostate cancer	3.7778e-11	189.995	-3424.02
rs117271894	A	G	A	G	192.8	-0.0055	0.0022	0.0162	8	112881674	0.0331	0.869	140254	61106	outcome	1.62701e-08	112881674	34.06	3408	8	CD45RA- CD28- CD8+ T cell Absolute Count	prostate cancer	2.72919e-08	163.196	-3427
rs117413806	C	T	C	T	364.8	-0.0333	0.0004	0.0261	11	16290338	0.0286	0.2449	140254	61106	outcome	3.57001e-08	16290338	66.04	3408	11	CD45RA- CD28- CD8+ T cell Absolute Count	prostate cancer	1.36502e-07	106.421	-3438.31
rs117428784	A	C	A	C	472.2	0.0071	0.0004	0.013	19	43422957	0.044	0.8717	140254	61106	outcome	2.03095e-11	43422957	70.2	3408	19	CD45RA- CD28- CD8+ T cell Absolute Count	prostate cancer	3.95226e-11	178.307	-3425.21
rs117431224	G	A	G	A	385.7	0.0181	0.0004	0.0159	11	44356396	0.0389	0.641899	140254	61106	outcome	2.31201e-08	44356396	68.87	3408	11	CD45RA- CD28- CD8+ T cell Absolute Count	prostate cancer	4.96015e-08	118.964	-3434.87
rs117469911	A	C	A	C	132.8	-0.0186	0.0035	0.0119	7	79791344	0.0433	0.6675	140254	61106	outcome	1.238e-10	79791344	20.58	3408	7	CD45RA- CD28- CD8+ T cell Absolute Count	prostate cancer	3.05531e-10	123.019	-3433.91
rs117514047	C	A	C	A	462.3	0.0158	0.0003	0.0126	21	26316207	0.0394	0.6895	140254	61106	outcome	2.70801e-08	26316207	82.97	3408	21	CD45RA- CD28- CD8+ T cell Absolute Count	prostate cancer	5.4923e-08	128.194	-3432.78
rs117785622	T	G	T	G	232.5	0.012	0.001	0.0158	12	132283582	0.0365	0.742299	140254	61106	outcome	3.62602e-08	132283582	42.11	3408	12	CD45RA- CD28- CD8+ T cell Absolute Count	prostate cancer	6.81781e-08	108.004	-3437.83
rs117804407	G	A	G	A	2185	0.0123		0.016	16	5944116	0.0375	0.742499	140254	61106	outcome	2.46297e-08	5944116	391	3408	16	CD45RA- CD28- CD8+ T cell Absolute Count	prostate cancer	4.71063e-08
rs12464465	A	G	A	G	189.7	0.0425	0.0015	0.0172	2	176542288	0.0329	0.1957	140254	61106	outcome	4.08602e-08	176542288	34.49	3408	2	CD45RA- CD28- CD8+ T cell Absolute Count	prostate cancer	1.72392e-07	107.796	-3437.89
rs13044559	A	G	A	G	1678	-0.0144		0.0174	20	36073660	0.0337	0.668199	140254	61106	outcome	3.87802e-08	36073660	304.6	3408	20	CD45RA- CD28- CD8+ T cell Absolute Count	prostate cancer	7.93714e-08
rs137978465	A	G	A	G	641.1	0.0273	0.0004	0.0165	2	228411157	0.0353	0.4399	140254	61106	outcome	2.23821e-21	228411157	67.08	3408	2	CD45RA- CD28- CD8+ T cell Absolute Count	prostate cancer	1.6766e-20	328.676	-3416.39
rs138010330	T	C	T	C	111	-0.0521	0.0048	0.0169	1	161526187	0.0386	0.1768	140254	61106	outcome	1.88899e-08	161526187	19.7	3408	1	CD45RA- CD28- CD8+ T cell Absolute Count	prostate cancer	8.78994e-08	117.714	-3435.18
rs138358136	T	A	T	A	726.8	-0.0403	0.0003	0.02	7	194075	0.0353	0.2533	140254	61106	outcome	1.25893e-18	194075	82.02	3408	7	CD45RA- CD28- CD8+ T cell Absolute Count	prostate cancer	1.2824e-17	316.848	-3416.78
rs138799468	T	C	T	C	791.9	0.0161	0.0001	0.0142	2	9441279	0.0416	0.6979	140254	61106	outcome	1.17409e-15	9441279	98.43	3408	2	CD45RA- CD28- CD8+ T cell Absolute Count	prostate cancer	3.73008e-15	125.409	-3433.38
rs138829583	A	G	A	G	463.8	0.0635	0.0004	0.007	1	79094990	0.059	0.2819	140254	61106	outcome	2.45697e-15	79094990	58.31	3408	1	CD45RA- CD28- CD8+ T cell Absolute Count	prostate cancer	1.74385e-14	172.02	-3425.92
rs138962348	C	T	C	T	259.1	0.0011	0.0007	0.0267	2	146534594	0.029	0.9685	140254	61106	outcome	9.69706e-09	146534594	45.06	3408	2	CD45RA- CD28- CD8+ T cell Absolute Count	prostate cancer	1.46399e-08	93.9201	-3442.66
rs139457426	T	C	T	C	71.36	0.0105	0.0147	0.0206	12	47679643	0.0322	0.7443	140254	61106	outcome	9.2406e-11	47679643	10.98	3408	12	CD45RA- CD28- CD8+ T cell Absolute Count	prostate cancer	2.05381e-10	147.511	-3429.25
rs139772031	G	T	G	T	550.9	-0.0103	0.0001	0.0111	3	10035985	0.0483	0.8312	140254	61106	outcome	2.171e-08	10035985	98.17	3408	3	CD45RA- CD28- CD8+ T cell Absolute Count	prostate cancer	3.74153e-08	60.6921	-3463.06
rs140112233	C	G	C	G	887.7	0.0072	0.0001	0.0121	7	115835641	0.0392	0.8543	140254	61106	outcome	1.32898e-09	115835641	146	3408	7	CD45RA- CD28- CD8+ T cell Absolute Count	prostate cancer	2.40658e-09	157.586	-3427.75
rs140134394	C	T	C	T	151.8	0.0109	0.0028	0.0179	16	17341866	0.0355	0.759299	140254	61106	outcome	9.75596e-10	17341866	24.76	3408	16	CD45RA- CD28- CD8+ T cell Absolute Count	prostate cancer	1.99128e-09	128.681	-3432.68
rs140311178	T	C	T	C	142.3	0.0495	0.0037	0.0376	4	8174723	0.0262	0.0590296	140254	61106	outcome	2.86999e-10	8174723	22.5	3408	4	CD45RA- CD28- CD8+ T cell Absolute Count	prostate cancer	2.76303e-09	149.29	-3428.97
rs140605634	T	C	T	C	161.7	0.0464	0.0025	0.0068	16	68607748	0.0553	0.4019	140254	61106	outcome	1.32501e-09	68607748	26.59	3408	16	CD45RA- CD28- CD8+ T cell Absolute Count	prostate cancer	4.41476e-09	130.408	-3432.32
rs140963286	T	C	T	C	760.9	-0.0706	0.0001	0.0074	1	24640467	0.0539	0.1902	140254	61106	outcome	4.67951e-14	24640467	100.5	3408	1	CD45RA- CD28- CD8+ T cell Absolute Count	prostate cancer	3.94888e-13	115.782	-3435.67
rs141023610	A	G	A	G	556.4	-0.0342	0.0004	0.0082	3	15790899	0.0494	0.4891	140254	61106	outcome	4.5144e-11	15790899	84.21	3408	3	CD45RA- CD28- CD8+ T cell Absolute Count	prostate cancer	1.48304e-10	247.566	-3419.81
rs141656121	T	A	T	A	754.3	0.0052	0.0001	0.0112	11	91872187	0.0461	0.9099	140254	61106	outcome	4.01606e-13	91872187	103.6	3408	11	CD45RA- CD28- CD8+ T cell Absolute Count	prostate cancer	8.23826e-13	113.782	-3436.2
rs142304851	A	G	A	G	388.9	-0.0744	0.0006	0.0123	12	8226206	0.0488	0.1273	140254	61106	outcome	1.36899e-09	8226206	64.01	3408	12	CD45RA- CD28- CD8+ T cell Absolute Count	prostate cancer	8.5729e-09	181.383	-3424.88
rs142470414	T	C	T	C	259.6	-0.0015	0.0009	0.0156	13	73498369	0.0345	0.9655	140254	61106	outcome	2.11198e-09	73498369	43.23	3408	13	CD45RA- CD28- CD8+ T cell Absolute Count	prostate cancer	3.30847e-09	121.197	-3434.34
rs142522853	T	C	T	C	595.1	-0.0008	0.0003	0.0219	7	1084031	0.0289	0.9772	140254	61106	outcome	1.2249e-16	1084031	71.5	3408	7	CD45RA- CD28- CD8+ T cell Absolute Count	prostate cancer	2.59589e-16	212.423	-3422.11
rs142911819	A	G	A	G	320.2	0.0641	0.0006	0.0101	12	114081812	0.0476	0.1787	140254	61106	outcome	1.41501e-08	114081812	56.32	3408	12	CD45RA- CD28- CD8+ T cell Absolute Count	prostate cancer	6.64207e-08	122.96	-3433.93
rs143825022	T	C	T	C	251.2	0.0051	0.001	0.0231	8	28561116	0.0309	0.8678	140254	61106	outcome	1.149e-09	28561116	41.16	3408	8	CD45RA- CD28- CD8+ T cell Absolute Count	prostate cancer	2.0598e-09	126.077	-3433.23
rs143845801	C	G	C	G	271.2	-0.0502	0.0007	0.0176	7	84434549	0.0402	0.2119	140254	61106	outcome	2.386e-08	84434549	48.48	3408	7	CD45RA- CD28- CD8+ T cell Absolute Count	prostate cancer	1.00469e-07	102.897	-3439.43
rs144571871	G	A	G	A	725.9	-0.072	0.0001	0.0111	1	65133062	0.0529	0.1733	140254	61106	outcome	6.75772e-13	65133062	100.6	3408	1	CD45RA- CD28- CD8+ T cell Absolute Count	prostate cancer	5.16192e-12	105.376	-3438.63
rs144711723	T	C	T	C	429	-0.0479	0.0003	0.0132	2	145836600	0.0395	0.2257	140254	61106	outcome	1.06001e-08	145836600	74.81	3408	2	CD45RA- CD28- CD8+ T cell Absolute Count	prostate cancer	4.51167e-08	110.391	-3437.14
rs144993401	A	G	A	G	1279	0.0182		0.0098	12	38374287	0.0506	0.7185	140254	61106	outcome	2.02502e-08	38374287	227.4	3408	12	CD45RA- CD28- CD8+ T cell Absolute Count	prostate cancer	3.95976e-08
rs145336406	T	C	T	C	148.2	0.009	0.0026	0.0168	6	78745175	0.0333	0.787399	140254	61106	outcome	4.22202e-09	78745175	25.16	3408	6	CD45RA- CD28- CD8+ T cell Absolute Count	prostate cancer	8.03238e-09	113.912	-3436.17
rs145613913	A	G	A	G	281.9	-0.1406	0.0009	0.0031	6	70855865	0.0761	0.0648097	140254	61106	outcome	2.80001e-09	70855865	47.31	3408	6	CD45RA- CD28- CD8+ T cell Absolute Count	prostate cancer	2.2441e-08	142.913	-3430
rs146164275	G	A	G	A	262.3	0.0255	0.0009	0.0097	17	76005958	0.0494	0.606001	140254	61106	outcome	5.71202e-09	76005958	44.92	3408	17	CD45RA- CD28- CD8+ T cell Absolute Count	prostate cancer	1.3489e-08	123.731	-3433.75
rs146940094	T	G	T	G	285.3	0.0083	0.0007	0.0146	15	94946993	0.0392	0.8331	140254	61106	outcome	1.66399e-09	94946993	47.21	3408	15	CD45RA- CD28- CD8+ T cell Absolute Count	prostate cancer	3.08388e-09	113.875	-3436.18
rs147385696	G	C	G	C	326.5	-0.0472	0.0006	0.0205	6	143880059	0.0292	0.1063	140254	61106	outcome	5.12602e-09	143880059	55.73	3408	6	CD45RA- CD28- CD8+ T cell Absolute Count	prostate cancer	3.21383e-08	127.846	-3432.85
rs147802671	T	G	T	G	564.5	0.0243	0.0003	0.0043	16	32022251	0.0925	0.7927	140254	61106	outcome	2.17601e-09	32022251	94.08	3408	16	CD45RA- CD28- CD8+ T cell Absolute Count	prostate cancer	4.1785e-09	191.139	-3423.91
rs148362510	C	G	C	G	363.2	0.0812	0.0004	0.0123	18	3267975	0.041	0.0476003	140254	61106	outcome	1.58599e-09	3267975	60.02	3408	18	CD45RA- CD28- CD8+ T cell Absolute Count	prostate cancer	1.48986e-08	105.489	-3438.6
rs148620542	T	A	T	A	358.6	-0.0301	0.0006	0.0158	1	178035728	0.0367	0.4131	140254	61106	outcome	4.53733e-12	178035728	51.64	3408	1	CD45RA- CD28- CD8+ T cell Absolute Count	prostate cancer	1.8414e-11	154.22	-3428.23
rs148658406	T	C	T	C	751.4	0.0441	0.0001	0.012	3	153311399	0.0414	0.2875	140254	61106	outcome	7.82168e-14	153311399	100.1	3408	3	CD45RA- CD28- CD8+ T cell Absolute Count	prostate cancer	4.77276e-13	112.909	-3436.44
rs148799115	C	A	C	A	55.39	-0.0963	0.0175	0.0092	4	45244488	0.0506	0.0569994	140254	61106	outcome	2.869e-08	45244488	9.959	3408	4	CD45RA- CD28- CD8+ T cell Absolute Count	prostate cancer	2.06485e-07	105.503	-3438.59
rs149124296	C	G	C	G	307.6	-0.0069	0.0006	0.025	1	213124992	0.029	0.8127	140254	61106	outcome	3.35097e-08	213124992	55.58	3408	1	CD45RA- CD28- CD8+ T cell Absolute Count	prostate cancer	5.86768e-08	113.473	-3436.28
rs149716976	G	A	G	A	118.8	0.007	0.0057	0.0197	16	75062625	0.0322	0.8274	140254	61106	outcome	2.26621e-12	75062625	16.87	3408	16	CD45RA- CD28- CD8+ T cell Absolute Count	prostate cancer	4.95478e-12	159.976	-3427.42
rs149957527	A	G	A	G	913.1	-0.0276	0.0001	0.0087	6	52375282	0.0494	0.5764	140254	61106	outcome	4.71411e-20	52375282	98.95	3408	6	CD45RA- CD28- CD8+ T cell Absolute Count	prostate cancer	2.40671e-19	166.734	-3426.55
rs149994650	A	C	A	C	473.4	0.0997	0.0003	0.0129	3	18550864	0.0434	0.02172	140254	61106	outcome	6.09804e-09	18550864	81.22	3408	3	CD45RA- CD28- CD8+ T cell Absolute Count	prostate cancer	6.84937e-08	134.424	-3431.53
rs150383571	C	T	C	T	61.29	-0.0089	0.0141	0.0076	14	43151367	0.0582	0.8783	140254	61106	outcome	4.77101e-08	43151367	11.2	3408	14	CD45RA- CD28- CD8+ T cell Absolute Count	prostate cancer	7.66461e-08	104.439	-3438.93
rs150427323	A	G	A	G	352.4	0.0418	0.0007	0.0103	11	118189351	0.0456	0.36	140254	61106	outcome	1.08593e-12	118189351	49.32	3408	11	CD45RA- CD28- CD8+ T cell Absolute Count	prostate cancer	5.18898e-12	173.738	-3425.72
rs150650566	C	A	C	A	530.8	0.1195	0.0004	0.009	1	83046200	0.048	0.0128899	140254	61106	outcome	1.80593e-19	83046200	58.46	3408	1	CD45RA- CD28- CD8+ T cell Absolute Count	prostate cancer	1.21959e-17	225.309	-3421.18
rs150856260	T	C	T	C	337.2	0.0464	0.0007	0.0111	16	26527473	0.042	0.2697	140254	61106	outcome	3.73396e-10	26527473	53.66	3408	16	CD45RA- CD28- CD8+ T cell Absolute Count	prostate cancer	1.679e-09	159.074	-3427.55
rs151120803	A	G	A	G	402.2	0.0233	0.0004	0.017	9	96711406	0.0316	0.4621	140254	61106	outcome	4.24326e-11	96711406	60.78	3408	9	CD45RA- CD28- CD8+ T cell Absolute Count	prostate cancer	1.4551e-10	129.36	-3432.53
rs151145927	A	G	A	G	613.8	0.0458	0.0001	0.0141	18	38375388	0.0373	0.2189	140254	61106	outcome	1.49899e-11	38375388	90.65	3408	18	CD45RA- CD28- CD8+ T cell Absolute Count	prostate cancer	8.84778e-11	75.3426	-3451.81
rs151288286	A	T	A	T	521.2	0.0013	0.0004	0.0167	2	106552757	0.0402	0.9742	140254	61106	outcome	3.4033e-13	106552757	71.33	3408	2	CD45RA- CD28- CD8+ T cell Absolute Count	prostate cancer	6.24596e-13	217.233	-3421.75
rs151321252	A	G	A	G	995.8	0.0009		0.0166	1	1184085	0.0363	0.9798	140254	61106	outcome	5.70506e-09	1184085	170.5	3408	1	CD45RA- CD28- CD8+ T cell Absolute Count	prostate cancer	8.58325e-09
rs16864501	A	G	A	G	760.5	-0.0909	0.0001	0.0157	3	152385976	0.034	0.00744903	140254	61106	outcome	5.25291e-14	152385976	100.6	3408	3	CD45RA- CD28- CD8+ T cell Absolute Count	prostate cancer	1.97713e-12	115.66	-3435.71
rs17212021	C	T	C	T	-22.92	0.0175	0.2372	0.0411	6	32637474	0.0204	0.3895	140254	61106	outcome	2.31201e-08	32637474	4.094	3408	6	CD45RA- CD28- CD8+ T cell Absolute Count	prostate cancer	7.03162e-08	190.101	-3424.01
rs17212998	G	A	G	A	101.4	-0.0219	0.0053	0.0158	12	13243168	0.0472	0.642899	140254	61106	outcome	3.249e-08	13243168	18.3	3408	12	CD45RA- CD28- CD8+ T cell Absolute Count	prostate cancer	6.87166e-08	108.411	-3437.71
rs17676161	C	G	C	G	216.7	-0.0171	0.0013	0.0525	11	65259911	0.0199	0.3906	140254	61106	outcome	2.326e-09	65259911	36.18	3408	11	CD45RA- CD28- CD8+ T cell Absolute Count	prostate cancer	7.71416e-09	121.934	-3434.16
rs182784388	T	G	T	G	328.7	0.0136	0.0006	0.0067	1	18635367	0.0629	0.8287	140254	61106	outcome	5.39896e-09	18635367	56.2	3408	1	CD45RA- CD28- CD8+ T cell Absolute Count	prostate cancer	9.73634e-09	129.575	-3432.49
rs183382760	C	A	C	A	1005	0.0343	0.0003	0.0097	4	116470715	0.0437	0.4325	140254	61106	outcome	1.39187e-14	116470715	130	3408	4	CD45RA- CD28- CD8+ T cell Absolute Count	prostate cancer	6.65622e-14	605.833	-3411.63
rs185778924	A	G	A	G	332.4	-0.0448	0.0006	0.0095	7	148905542	0.0492	0.3632	140254	61106	outcome	3.92004e-09	148905542	56.32	3408	7	CD45RA- CD28- CD8+ T cell Absolute Count	prostate cancer	1.34155e-08	132.508	-3431.9
rs186595909	A	G	A	G	402.2	0.0001	0.0003	0.0151	15	78554710	0.0356	0.9977	140254	61106	outcome	2.386e-08	78554710	71.9	3408	15	CD45RA- CD28- CD8+ T cell Absolute Count	prostate cancer	3.43822e-08	97.0298	-3441.47
rs187115825	A	G	A	G	389.5	-0.0534	0.0006	0.0123	6	382181	0.0515	0.3004	140254	61106	outcome	1.078e-09	382181	63.7	3408	6	CD45RA- CD28- CD8+ T cell Absolute Count	prostate cancer	4.35323e-09	181.943	-3424.82
rs188394601	G	T	G	T	654.7	-0.0053	0.0003	0.0094	16	70343845	0.0569	0.926	140254	61106	outcome	1.05599e-08	70343845	114.1	3408	16	CD45RA- CD28- CD8+ T cell Absolute Count	prostate cancer	1.64919e-08	257.102	-3419.3
rs189683893	A	C	A	C	138.5	0.0402	0.0037	0.0194	10	89153882	0.0339	0.2353	140254	61106	outcome	1.79999e-10	89153882	21.65	3408	10	CD45RA- CD28- CD8+ T cell Absolute Count	prostate cancer	9.07541e-10	141.423	-3430.26
rs192302673	T	C	T	C	317.4	-0.0392	0.0009	0.0145	16	85685140	0.0438	0.3707	140254	61106	outcome	2.33884e-13	85685140	43.13	3408	16	CD45RA- CD28- CD8+ T cell Absolute Count	prostate cancer	1.13199e-12	181.174	-3424.9
rs192553272	T	C	T	C	293.3	-0.0652	0.0007	0.0127	4	114347303	0.0414	0.1157	140254	61106	outcome	2.15501e-09	114347303	48.87	3408	4	CD45RA- CD28- CD8+ T cell Absolute Count	prostate cancer	1.37598e-08	120.351	-3434.54
rs200097087	C	A	C	A	1076	0.0785		0.0114	11	33958122	0.049	0.1088	140254	61106	outcome	3.26588e-15	33958122	135.9	3408	11	CD45RA- CD28- CD8+ T cell Absolute Count	prostate cancer	4.29936e-14
rs2615702	T	C	T	C	-397.5	-0.0547	0.9991	0.9865	16	81462243	0.0401	0.1722	140254	61106	outcome	2.39994e-20	81462243	42.74	3408	16	CD45RA- CD28- CD8+ T cell Absolute Count	prostate cancer	3.90127e-19	284.155	-3418.03
rs34499829	A	G	A	G	308	0.0153	0.0007	0.0091	12	734001	0.0553	0.781801	140254	61106	outcome	4.56194e-10	734001	49.26	3408	12	CD45RA- CD28- CD8+ T cell Absolute Count	prostate cancer	9.19829e-10	132.717	-3431.86
rs34592474	C	T	C	T	256.7	0.0591	0.0009	0.0167	7	57279055	0.0362	0.1029	140254	61106	outcome	1.911e-08	57279055	45.57	3408	7	CD45RA- CD28- CD8+ T cell Absolute Count	prostate cancer	1.12572e-07	118.504	-3434.99
rs34609592	A	G	A	G	420	-0.032	0.0003	0.0148	9	136915695	0.0386	0.4063	140254	61106	outcome	3.874e-09	136915695	71.13	3408	9	CD45RA- CD28- CD8+ T cell Absolute Count	prostate cancer	1.2273e-08	105.808	-3438.5
rs36139379	A	C	A	C	347.1	0.1093	0.0009	0.0098	3	66271298	0.0496	0.0274701	140254	61106	outcome	7.21772e-13	66271298	48.19	3408	3	CD45RA- CD28- CD8+ T cell Absolute Count	prostate cancer	1.39312e-11	216.666	-3421.79
rs41276984	G	C	G	C	285.3	0.0027	0.0012	0.0207	20	37580670	0.03	0.9282	140254	61106	outcome	7.09088e-13	37580670	39.59	3408	20	CD45RA- CD28- CD8+ T cell Absolute Count	prostate cancer	1.36479e-12	195.116	-3423.55
rs45507192	A	G	A	G	416.6	0.0079	0.0003	0.0106	10	21304171	0.0456	0.8618	140254	61106	outcome	2.57697e-08	21304171	74.65	3408	10	CD45RA- CD28- CD8+ T cell Absolute Count	prostate cancer	4.2937e-08	104.102	-3439.04
rs55830085	T	C	T	C	548.7	-0.019	0.0004	0.03	4	106862213	0.0271	0.484	140254	61106	outcome	3.00802e-08	106862213	98.8	3408	4	CD45RA- CD28- CD8+ T cell Absolute Count	prostate cancer	7.85449e-08	240.761	-3420.21
rs55881385	T	G	T	G	721.2	-0.0571	0.0001	0.0181	1	34724192	0.0356	0.1091	140254	61106	outcome	4.49573e-15	34724192	91.57	3408	1	CD45RA- CD28- CD8+ T cell Absolute Count	prostate cancer	5.88838e-14	104.015	-3439.06
rs58860560	A	C	A	C	404.2	0.0141	0.0003	0.0149	6	79460848	0.035	0.688201	140254	61106	outcome	2.088e-08	79460848	71.96	3408	6	CD45RA- CD28- CD8+ T cell Absolute Count	prostate cancer	4.28527e-08	97.9972	-3441.11
rs59236867	C	T	C	T	178.9	0.0468	0.0023	0.0078	8	42077996	0.046	0.309	140254	61106	outcome	9.06985e-11	42077996	27.52	3408	8	CD45RA- CD28- CD8+ T cell Absolute Count	prostate cancer	4.04088e-10	146.885	-3429.35
rs59951086	C	A	C	A	347.8	-0.0239	0.0006	0.012	4	187679105	0.0519	0.6443	140254	61106	outcome	6.80597e-10	187679105	56.2	3408	4	CD45RA- CD28- CD8+ T cell Absolute Count	prostate cancer	1.62309e-09	145.071	-3429.64
rs61772921	C	T	C	T	644.1	0.0234	0.0001	0.0138	1	80897562	0.0362	0.5181	140254	61106	outcome	1.37401e-09	80897562	106	3408	1	CD45RA- CD28- CD8+ T cell Absolute Count	prostate cancer	3.79758e-09	82.9647	-3447.55
rs61864030	C	T	C	T	284.3	-0.0335	0.0006	0.0235	10	133431823	0.031	0.2799	140254	61106	outcome	3.68604e-08	133431823	51.52	3408	10	CD45RA- CD28- CD8+ T cell Absolute Count	prostate cancer	1.31178e-07	96.9336	-3441.5
rs62021713	T	C	T	C	1065	-0.0217	0.0001	0.0237	15	50365389	0.0302	0.4725	140254	61106	outcome	1.78402e-09	50365389	176.6	3408	15	CD45RA- CD28- CD8+ T cell Absolute Count	prostate cancer	5.32675e-09	226.822	-3421.08
rs62033204	A	T	A	T	195.7	-0.0164	0.0015	0.0235	16	17388418	0.0297	0.58	140254	61106	outcome	3.68502e-08	17388418	35.46	3408	16	CD45RA- CD28- CD8+ T cell Absolute Count	prostate cancer	8.35959e-08	114.723	-3435.95
rs62369101	A	G	A	G	251.6	0.1227	0.001	0.0143	5	97959184	0.0399	0.00208598	140254	61106	outcome	2.78298e-09	97959184	42.22	3408	5	CD45RA- CD28- CD8+ T cell Absolute Count	prostate cancer	6.52696e-08	126.479	-3433.14
rs62409210	A	G	A	G	610.4	-0.0109	0.0001	0.0207	4	25412773	0.0326	0.7382	140254	61106	outcome	1.10999e-08	25412773	106.6	3408	4	CD45RA- CD28- CD8+ T cell Absolute Count	prostate cancer	2.18764e-08	74.5102	-3452.33
rs62488802	T	C	T	C	591.6	0.0465	0.0003	0.0184	8	7162695	0.0378	0.2185	140254	61106	outcome	3.55713e-12	7162695	84.77	3408	8	CD45RA- CD28- CD8+ T cell Absolute Count	prostate cancer	2.24776e-11	209.931	-3422.3
rs62513410	A	G	A	G	75.05	-0.0205	0.0098	0.0257	8	142607179	0.0314	0.514801	140254	61106	outcome	8.28705e-09	142607179	12.99	3408	8	CD45RA- CD28- CD8+ T cell Absolute Count	prostate cancer	2.1683e-08	109.315	-3437.45
rs62531041	T	C	T	C	351.9	0.0063	0.0006	0.0095	19	48379346	0.0543	0.9079	140254	61106	outcome	1.67502e-09	48379346	58.23	3408	19	CD45RA- CD28- CD8+ T cell Absolute Count	prostate cancer	2.8179e-09	148.511	-3429.09
rs72728362	C	T	C	T	375.7	0.0122	0.0007	0.0139	8	127054086	0.0401	0.7604	140254	61106	outcome	2.635e-10	127054086	59.27	3408	8	CD45RA- CD28- CD8+ T cell Absolute Count	prostate cancer	5.53232e-10	197.472	-3423.34
rs72815709	C	T	C	T	185.1	0.0271	0.0022	0.0355	2	80415786	0.025	0.2777	140254	61106	outcome	6.76083e-12	80415786	26.88	3408	2	CD45RA- CD28- CD8+ T cell Absolute Count	prostate cancer	3.58015e-11	150.421	-3428.79
rs72847598	C	T	C	T	319.5	0.0101	0.0006	0.0127	17	71902183	0.0407	0.8048	140254	61106	outcome	1.86999e-09	71902183	53.02	3408	17	CD45RA- CD28- CD8+ T cell Absolute Count	prostate cancer	3.53554e-09	122.423	-3434.05
rs72929459	T	C	T	C	485.7	0.0516	0.0003	0.0134	2	200181613	0.0364	0.1571	140254	61106	outcome	3.28927e-11	200181613	72.98	3408	2	CD45RA- CD28- CD8+ T cell Absolute Count	prostate cancer	2.26029e-10	141.5	-3430.24
rs74651043	T	A	T	A	419.1	-0.0146	0.0003	0.0154	6	24233134	0.034	0.6675	140254	61106	outcome	1.59901e-08	24233134	73.98	3408	6	CD45RA- CD28- CD8+ T cell Absolute Count	prostate cancer	3.35506e-08	105.355	-3438.64
rs74902462	T	C	T	C	123.2	-0.0135	0.004	0.0296	12	59066617	0.0269	0.616401	140254	61106	outcome	1.42498e-08	59066617	21.68	3408	12	CD45RA- CD28- CD8+ T cell Absolute Count	prostate cancer	3.2393e-08	120.94	-3434.4
rs74932477	A	G	A	G	405.6	-0.0348	0.0004	0.0082	2	229222112	0.0494	0.4813	140254	61106	outcome	5.83579e-11	229222112	61.74	3408	2	CD45RA- CD28- CD8+ T cell Absolute Count	prostate cancer	1.91353e-10	131.556	-3432.09
rs75346347	T	C	T	C	88.88	0.0019	0.0073	0.0122	18	7862061	0.0398	0.962	140254	61106	outcome	2.65901e-08	7862061	15.94	3408	18	CD45RA- CD28- CD8+ T cell Absolute Count	prostate cancer	3.95326e-08	114.493	-3436.01
rs75420474	C	T	C	T	538.9	0.0132	0.0003	0.0107	18	39828718	0.0425	0.7561	140254	61106	outcome	4.02624e-13	39828718	73.99	3408	18	CD45RA- CD28- CD8+ T cell Absolute Count	prostate cancer	1.00983e-12	174.196	-3425.67
rs75828981	A	G	A	G	283	0.0124	0.0007	0.0168	2	144233823	0.0406	0.7605	140254	61106	outcome	1.554e-09	144233823	46.74	3408	2	CD45RA- CD28- CD8+ T cell Absolute Count	prostate cancer	3.14192e-09	112.046	-3436.67
rs75884646	A	G	A	G	186.4	0.0021	0.0022	0.0182	15	95776793	0.0398	0.9576	140254	61106	outcome	2.25996e-11	95776793	27.77	3408	15	CD45RA- CD28- CD8+ T cell Absolute Count	prostate cancer	3.87911e-11	152.541	-3428.48
rs76343453	C	T	C	T	224.8	0.0219	0.0018	0.0066	5	81353920	0.0531	0.6801	140254	61106	outcome	2.834e-12	81353920	32.07	3408	5	CD45RA- CD28- CD8+ T cell Absolute Count	prostate cancer	7.64549e-12	181.599	-3424.86
rs76506268	G	A	G	A	154.5	-0.0055	0.0032	0.0353	4	187981624	0.0268	0.836	140254	61106	outcome	8.23e-12	187981624	22.53	3408	4	CD45RA- CD28- CD8+ T cell Absolute Count	prostate cancer	1.72387e-11	152.281	-3428.51
rs76595423	G	T	G	T	147.3	0.0085	0.0035	0.0462	1	102745011	0.0202	0.6754	140254	61106	outcome	3.92898e-10	102745011	23.48	3408	1	CD45RA- CD28- CD8+ T cell Absolute Count	prostate cancer	9.2953e-10	151.349	-3428.65
rs76732756	A	G	A	G	187	-0.0496	0.0016	0.0225	1	221000197	0.0314	0.1148	140254	61106	outcome	1.74401e-08	221000197	33.11	3408	1	CD45RA- CD28- CD8+ T cell Absolute Count	prostate cancer	9.93968e-08	111.722	-3436.76
rs77152285	G	A	G	A	285.1	-0.0042	0.0006	0.0119	4	93935039	0.0401	0.9173	140254	61106	outcome	2.10601e-08	93935039	50.77	3408	4	CD45RA- CD28- CD8+ T cell Absolute Count	prostate cancer	3.33058e-08	97.4799	-3441.3
rs77164608	A	G	A	G	379.6	-0.0544	0.0006	0.0152	7	21673701	0.0374	0.1458	140254	61106	outcome	5.75599e-10	21673701	61.08	3408	7	CD45RA- CD28- CD8+ T cell Absolute Count	prostate cancer	3.54096e-09	172.812	-3425.82
rs77243672	G	T	G	T	109	-0.0303	0.0072	0.0112	14	76846837	0.0418	0.4679	140254	61106	outcome	4.63767e-12	76846837	15.71	3408	14	CD45RA- CD28- CD8+ T cell Absolute Count	prostate cancer	1.73333e-11	169.855	-3426.17
rs77937827	C	T	C	T	358.8	-0.0232	0.0004	0.0204	20	20799344	0.0366	0.5254	140254	61106	outcome	2.28302e-10	20799344	56.41	3408	20	CD45RA- CD28- CD8+ T cell Absolute Count	prostate cancer	6.66443e-10	102.949	-3439.41
rs78656354	A	G	A	G	263.3	-0.0416	0.0013	0.0223	1	166905650	0.031	0.1791	140254	61106	outcome	1.89496e-12	166905650	37.24	3408	1	CD45RA- CD28- CD8+ T cell Absolute Count	prostate cancer	1.36607e-11	180.016	-3425.03
rs78823021	A	C	A	C	539.4	-0.0617	0.0001	0.0136	14	44303945	0.0375	0.0995497	140254	61106	outcome	9.82992e-09	44303945	93.85	3408	14	CD45RA- CD28- CD8+ T cell Absolute Count	prostate cancer	6.10607e-08	58.1847	-3465.56
rs78939697	C	A	C	A	74.28	0.0263	0.0125	0.0119	6	67374008	0.0403	0.514	140254	61106	outcome	1.287e-10	67374008	11.52	3408	6	CD45RA- CD28- CD8+ T cell Absolute Count	prostate cancer	3.93092e-10	136.214	-3431.19
rs79407975	A	C	A	C	389.2	-0.0252	0.0003	0.0162	10	28109090	0.0334	0.4496	140254	61106	outcome	4.144e-08	28109090	70.79	3408	10	CD45RA- CD28- CD8+ T cell Absolute Count	prostate cancer	1.11172e-07	90.8587	-3443.9
rs79489889	A	G	A	G	239.7	-0.0556	0.001	0.006	3	39505173	0.0606	0.3593	140254	61106	outcome	1.26101e-08	39505173	42.01	3408	3	CD45RA- CD28- CD8+ T cell Absolute Count	prostate cancer	4.09428e-08	114.797	-3435.93
rs79647440	T	C	T	C	521.4	0.029	0.0004	0.0126	7	142438302	0.0483	0.5488	140254	61106	outcome	2.07501e-09	142438302	86.78	3408	7	CD45RA- CD28- CD8+ T cell Absolute Count	prostate cancer	5.44657e-09	217.399	-3421.74
rs79870119	A	G	A	G	397.6	0.0626	0.0004	0.0244	4	64142694	0.029	0.03095	140254	61106	outcome	3.49599e-08	64142694	71.92	3408	4	CD45RA- CD28- CD8+ T cell Absolute Count	prostate cancer	3.03618e-07	126.418	-3433.16
rs79888820	C	T	C	T	514.7	0.0095	0.0003	0.0186	15	96888705	0.0381	0.803	140254	61106	outcome	3.96899e-10	96888705	82.05	3408	15	CD45RA- CD28- CD8+ T cell Absolute Count	prostate cancer	7.89391e-10	158.902	-3427.57
rs80012883	T	G	T	G	368.8	0.0017	0.0004	0.0125	13	94341740	0.0378	0.964	140254	61106	outcome	2.585e-08	94341740	66.09	3408	13	CD45RA- CD28- CD8+ T cell Absolute Count	prostate cancer	3.84907e-08	108.767	-3437.61
rs80142250	T	C	T	C	128.8	0.034	0.0034	0.0103	13	110903174	0.0474	0.4735	140254	61106	outcome	6.54395e-09	110903174	22.13	3408	13	CD45RA- CD28- CD8+ T cell Absolute Count	prostate cancer	1.80211e-08	112.425	-3436.57
rs80347872	A	G	A	G	1621	-0.0163		0.021	6	562203	0.0303	0.5895	140254	61106	outcome	1.54899e-10	562203	252.5	3408	6	CD45RA- CD28- CD8+ T cell Absolute Count	prostate cancer	4.18975e-10
rs117430146	C	G	C	G	0.3293	0.0714	0.0561	0.0133	22	41998660	0.0367	0.0515395	140254	61106	outcome	3.71903e-09	41998660	0.05572	3657	22	BAFF-R on IgD+ CD38dim B cell	prostate cancer	3.50103e-08	0.0114842	42.4626
rs117705111	A	G	A	G	-0.7505	0.0291	0.0365	0.0315	22	41957510	0.0236	0.2178	140254	61106	outcome	3.08674e-30	41957510	0.06509	3657	22	BAFF-R on IgD+ CD38dim B cell	prostate cancer	1.03781e-28	0.0396165	150.771
rs149806587	G	A	G	A	-0.5223	-0.0553	0.0526	0.0118	22	40774205	0.0419	0.1866	140254	61106	outcome	1.44411e-19	40774205	0.05739	3657	22	BAFF-R on IgD+ CD38dim B cell	prostate cancer	2.3419e-18	0.0271887	102.152
rs1801274	G	A	G	A	-0.1765	-0.0078	0.325	0.5082	1	161479745	0.0082	0.3417	140254	61106	outcome	6.47143e-11	161479745	0.02694	3657	1	BAFF-R on IgD+ CD38dim B cell	prostate cancer	2.92254e-10	0.013668	50.649
rs1894588	T	C	T	C	-0.5308	-0.0178	0.0622	0.0361	22	40629980	0.0225	0.4298	140254	61106	outcome	5.43751e-25	40629980	0.05104	3657	22	BAFF-R on IgD+ CD38dim B cell	prostate cancer	6.15605e-24	0.0328694	124.221
rs3819676	A	T	A	T	-0.4355	0.0331	0.1406	0.0797	22	43339960	0.0148	0.02516	140254	61106	outcome	4.92153e-33	43339960	0.03601	3657	22	BAFF-R on IgD+ CD38dim B cell	prostate cancer	1.27252e-30	0.0458339	175.57
rs5757678	T	C	T	C	0.2184	0.0007	0.6418	0.7323	22	39843409	0.0091	0.9399	140254	61106	outcome	5.07575e-17	39843409	0.02591	3657	22	BAFF-R on IgD+ CD38dim B cell	prostate cancer	1.21782e-16	0.0219311	81.9556
rs73165129	T	C	T	C	-1.516	0.0018	0.099	0.0803	22	42315371	0.0148	0.904	140254	61106	outcome	1e-200	42315371	0.03358	3657	22	BAFF-R on IgD+ CD38dim B cell	prostate cancer	0	0.410004	2539.96
rs76146864	T	C	T	C	-0.7149	-0.0253	0.0264	0.022	22	40246055	0.0294	0.3887	140254	61106	outcome	5.93745e-20	40246055	0.07772	3657	22	BAFF-R on IgD+ CD38dim B cell	prostate cancer	5.20397e-19	0.0262727	98.6178
rs117430146	C	G	C	G	0.3056	0.0714	0.0561	0.0133	22	41998660	0.0367	0.0515395	140254	61106	outcome	4.72803e-08	41998660	0.05584	3657	22	BAFF-R on naive-mature B cell	prostate cancer	3.68108e-07	0.00989067	36.5115
rs117705111	A	G	A	G	-0.7531	0.0291	0.0365	0.0315	22	41957510	0.0236	0.2178	140254	61106	outcome	2.26986e-30	41957510	0.06516	3657	22	BAFF-R on naive-mature B cell	prostate cancer	7.69374e-29	0.0398915	151.861
rs149806587	G	A	G	A	-0.5248	-0.0553	0.0526	0.0118	22	40774205	0.0419	0.1866	140254	61106	outcome	1.09295e-19	40774205	0.05747	3657	22	BAFF-R on naive-mature B cell	prostate cancer	1.79347e-18	0.0274496	103.16
rs1801274	G	A	G	A	-0.1866	-0.0078	0.325	0.5082	1	161479745	0.0082	0.3417	140254	61106	outcome	5.2517e-12	161479745	0.02696	3657	1	BAFF-R on naive-mature B cell	prostate cancer	2.6362e-11	0.0152771	56.704
rs182240980	T	A	T	A	-1.5	0.0018	0.099	0.0803	22	42317478	0.0148	0.903	140254	61106	outcome	1e-200	42317478	0.03385	3657	22	BAFF-R on naive-mature B cell	prostate cancer	0	0.401396	2450.87
rs1894588	T	C	T	C	-0.5235	-0.0178	0.0622	0.0361	22	40629980	0.0225	0.4298	140254	61106	outcome	2.83531e-24	40629980	0.05113	3657	22	BAFF-R on naive-mature B cell	prostate cancer	3.00194e-23	0.0319716	120.716
rs3819676	A	T	A	T	-0.4335	0.0331	0.1406	0.0797	22	43339960	0.0148	0.02516	140254	61106	outcome	1.23709e-32	43339960	0.03608	3657	22	BAFF-R on naive-mature B cell	prostate cancer	3.07462e-30	0.0454139	173.885
rs5757678	T	C	T	C	0.2161	0.0007	0.6418	0.7323	22	39843409	0.0091	0.9399	140254	61106	outcome	1.16305e-16	39843409	0.02596	3657	22	BAFF-R on naive-mature B cell	prostate cancer	2.86555e-16	0.0214716	80.2008
rs76146864	T	C	T	C	-0.7259	-0.0253	0.0264	0.022	22	40246055	0.0294	0.3887	140254	61106	outcome	1.77787e-20	40246055	0.0778	3657	22	BAFF-R on naive-mature B cell	prostate cancer	1.61685e-19	0.0270874	101.761
rs117086217	G	A	G	A	-0.5	-0.0397	0.0343	0.0242	22	39876838	0.0302	0.188	140254	61106	outcome	1.20088e-13	39876838	0.06715	3657	22	BAFF-R on unswitched memory B cell	prostate cancer	1.06418e-12	0.0165618	61.5526
rs118137006	C	A	C	A	-0.7405	0.0481	0.015	0.0135	22	40727723	0.0419	0.2509	140254	61106	outcome	1.70412e-12	40727723	0.1046	3657	22	BAFF-R on unswitched memory B cell	prostate cancer	1.12804e-11	0.0162035	60.1991
rs13058590	T	C	T	C	-0.3847	0.0113	0.0468	0.0176	22	39641412	0.0341	0.7405	140254	61106	outcome	9.08448e-11	39641412	0.05918	3657	22	BAFF-R on unswitched memory B cell	prostate cancer	2.13275e-10	0.013204	48.9062
rs146069723	T	C	T	C	-0.5628	0.1283	0.0756	0.0153	22	43339331	0.0323	7.26106e-05	140254	61106	outcome	1.57616e-31	43339331	0.04773	3657	22	BAFF-R on unswitched memory B cell	prostate cancer	7.96461e-28	0.0442711	169.306
rs187315152	T	A	T	A	-0.5144	-0.0357	0.0535	0.0157	22	41305795	0.0389	0.359	140254	61106	outcome	2.05779e-18	41305795	0.05846	3657	22	BAFF-R on unswitched memory B cell	prostate cancer	1.75525e-17	0.0267982	100.645
rs2142827	A	G	A	G	-0.3298	0.0056	0.1416	0.2342	22	42874781	0.0115	0.6265	140254	61106	outcome	5.84117e-20	42874781	0.03584	3657	22	BAFF-R on unswitched memory B cell	prostate cancer	2.94153e-19	0.0264414	99.2681
rs5758649	T	C	T	C	-0.6019	0.0151	0.0871	0.0275	22	42605548	0.0261	0.5629	140254	61106	outcome	3.18493e-40	42605548	0.04479	3657	22	BAFF-R on unswitched memory B cell	prostate cancer	5.17178e-39	0.0576129	223.449
rs73165129	T	C	T	C	-1.494	0.0018	0.099	0.0803	22	42315371	0.0148	0.904	140254	61106	outcome	1e-200	42315371	0.03383	3657	22	BAFF-R on unswitched memory B cell	prostate cancer	0	0.398191	2418.35
rs9614288	T	A	T	A	-0.3124	0.0152	0.2346	0.2413	22	44297686	0.0109	0.1634	140254	61106	outcome	1.692e-26	44297686	0.0291	3657	22	BAFF-R on unswitched memory B cell	prostate cancer	5.74312e-25	0.0350484	132.755
rs112417310	A	G	A	G	0.5594	-0.0128	0.0201	0.0109	1	206855483	0.0423	0.7623	140254	61106	outcome	3.64897e-10	206855483	0.089	3657	1	CD19 on IgD+ CD38dim B cell	prostate cancer	8.00182e-10	0.0123269	45.617
rs113812519	G	A	G	A	0.5583	-0.0433	0.0185	0.0133	1	207276336	0.0425	0.3079	140254	61106	outcome	1.22301e-09	207276336	0.09163	3657	1	CD19 on IgD+ CD38dim B cell	prostate cancer	5.16321e-09	0.0113195	41.8465
rs138920008	C	G	C	G	-1.234	-0.0132	0.0041	0.0432	16	32422808	0.0265	0.6181	140254	61106	outcome	1.49599e-08	32422808	0.2174	3657	16	CD19 on IgD+ CD38dim B cell	prostate cancer	3.48172e-08	0.0124354	46.0237
rs144743804	A	G	A	G	0.5079	-0.0721	0.0197	0.0102	1	207018206	0.0479	0.1325	140254	61106	outcome	1.33601e-08	207018206	0.0892	3657	1	CD19 on IgD+ CD38dim B cell	prostate cancer	7.7741e-08	0.00996349	36.7831
rs1569590	G	A	G	A	0.2082	-0.008	0.8748	0.91	6	15898884	0.0146	0.5835	140254	61106	outcome	1.84502e-08	15898884	0.03692	3657	6	CD20 on IgD+ CD24+ B cell	prostate cancer	4.47379e-08	0.00949521	35.0377
rs55809481	C	T	C	T	-0.2125	0.0058	0.2425	0.2478	19	49872521	0.0093	0.5316	140254	61106	outcome	1.60509e-13	49872521	0.0287	3657	19	CD20 on IgD+ CD24+ B cell	prostate cancer	6.42958e-13	0.0165898	61.6588
rs1799693	G	A	G	A	-0.2018	0.0194	0.8286	0.9277	6	106992464	0.0157	0.215	140254	61106	outcome	6.12097e-10	106992464	0.03253	3655	6	CD24 on IgD+ CD38+ B cell	prostate cancer	3.30076e-09	0.0115672	42.7495
rs9398107	G	A	G	A	-0.4386	-0.0002	0.0555	0.0529	6	107155687	0.0189	0.9898	140254	61106	outcome	1.27997e-15	107155687	0.0546	3655	6	CD24 on IgD+ CD38+ B cell	prostate cancer	2.69122e-15	0.020168	75.19
rs72948545	G	A	G	A	-0.7352	-0.0104	0.0586	0.0545	6	107168477	0.0187	0.576901	140254	61106	outcome	6.21298e-45	107168477	0.05156	3653	6	CD24 on memory B cell	prostate cancer	1.12004e-43	0.0596366	231.542
rs62626323	A	C	A	C	0.2969	-0.0034	0.1075	0.0494	10	6115678	0.0184	0.8539	140254	61106	outcome	1.77787e-13	6115678	0.04016	3657	10	CD25 on transitional B cell	prostate cancer	4.16907e-13	0.0169148	62.8874
rs709589	T	C	T	C	-0.2255	0.0005	0.4557	0.4292	14	106306841	0.0123	0.9698	140254	61106	outcome	5.40754e-13	106306841	0.03114	3657	14	CD25 on transitional B cell	prostate cancer	1.04441e-12	0.0252255	94.5853
rs144642376	G	A	G	A	0.2712	-0.014	0.0718	0.0233	3	36349691	0.0308	0.6506	140254	61106	outcome	3.82402e-08	36349691	0.04922	3656	3	CD27 on unswitched memory B cell	prostate cancer	8.37293e-08	0.00980337	36.1762
rs1801274	G	A	G	A	-0.1586	-0.0078	0.3251	0.5082	1	161479745	0.0082	0.3417	140254	61106	outcome	3.133e-09	161479745	0.02671	3656	1	CD27 on unswitched memory B cell	prostate cancer	1.19625e-08	0.0110381	40.7832
rs25680	A	G	A	G	-0.2612	-0.0109	0.167	0.2186	12	6554628	0.0108	0.3134	140254	61106	outcome	6.59629e-15	6554628	0.03338	3656	12	CD27 on unswitched memory B cell	prostate cancer	4.63466e-14	0.0189818	70.7016
rs35574803	C	T	C	T	0.7465	0.0389	0.0561	0.0222	3	32533246	0.0298	0.192	140254	61106	outcome	8.01863e-44	32533246	0.05306	3656	3	CD27 on unswitched memory B cell	prostate cancer	7.20584e-42	0.0590172	229.174
rs4810485	G	T	G	T	-0.4783	-0.0014	0.6313	0.7424	20	44747947	0.0092	0.879	140254	61106	outcome	5.93335e-78	44747947	0.02498	3656	20	CD27 on unswitched memory B cell	prostate cancer	5.28383e-77	0.106498	435.524
rs56237381	A	G	A	G	0.4379	0.0213	0.0272	0.0283	3	32924804	0.0282	0.4504	140254	61106	outcome	1.39399e-08	32924804	0.077	3656	3	CD27 on unswitched memory B cell	prostate cancer	4.13451e-08	0.0101478	37.4602
rs6066198	G	T	G	T	-0.2691	-0.0338	0.07	0.0294	20	45732275	0.0313	0.2795	140254	61106	outcome	4.95496e-08	45732275	0.04925	3656	20	CD27 on unswitched memory B cell	prostate cancer	1.84757e-07	0.00942841	34.7793
rs709589	T	C	T	C	-0.1755	0.0005	0.4557	0.4292	14	106306841	0.0123	0.9698	140254	61106	outcome	2.77703e-08	106306841	0.03152	3656	14	CD27 on unswitched memory B cell	prostate cancer	4.21025e-08	0.0152792	56.6966
rs75918255	A	G	A	G	0.5086	-0.0097	0.035	0.0232	3	32945761	0.0332	0.769501	140254	61106	outcome	9.62498e-14	32945761	0.06804	3656	3	CD27 on unswitched memory B cell	prostate cancer	2.60677e-13	0.0174734	64.9834
rs10272514	T	A	T	A	0.1553	0.0103	0.3924	0.3544	7	40012831	0.0085	0.2256	140254	61106	outcome	7.05001e-10	40012831	0.02512	3656	7	IgD on IgD+ CD24- B cell	prostate cancer	3.66018e-09	0.0115006	42.512
rs28634695	A	G	A	G	-0.2027	0.013	0.408	0.4336	15	40856113	0.008	0.1065	140254	61106	outcome	5.69902e-16	40856113	0.02492	3656	15	IgD on IgD+ CD24- B cell	prostate cancer	9.4768e-15	0.0198481	73.9937
rs28723652	A	C	A	C	0.4338	-0.0065	0.0442	0.0778	14	106644507	0.0252	0.7962	140254	61106	outcome	3.22203e-09	106644507	0.0731	3656	14	IgD on IgD+ CD24- B cell	prostate cancer	6.35018e-09	0.0159	59.0375
rs35501848	T	G	T	G	-0.1633	-0.0055	0.4878	0.3432	17	62021003	0.0085	0.5188	140254	61106	outcome	6.58415e-11	62021003	0.02494	3656	17	IgD on IgD+ CD24- B cell	prostate cancer	2.18809e-10	0.0133255	49.349
rs709589	T	C	T	C	-0.6633	0.0005	0.4557	0.4292	14	106306841	0.0123	0.9698	140254	61106	outcome	4.57088e-103	106306841	0.02979	3656	14	IgD on IgD+ CD24- B cell	prostate cancer	1.45783e-102	0.218257	1020.17
rs709589	T	C	T	C	-0.5029	0.0005	0.4558	0.4292	14	106306841	0.0123	0.9698	140254	61106	outcome	4.99804e-58	106306841	0.03076	3642	14	IgD on IgD+ CD38- B cell	prostate cancer	3.28269e-57	0.125466	522.217
rs3917768	G	T	G	T	0.1797	0.004	0.3642	0.4573	1	169572947	0.0082	0.6236	140254	61106	outcome	7.06155e-11	169572947	0.02746	2871	1	CD62L on CD62L+ Dendritic Cell	prostate cancer	1.63757e-10	0.014955	43.5573
rs7526645	T	C	T	C	0.1721	0.0095	0.4599	0.4191	1	169728916	0.0081	0.2401	140254	61106	outcome	5.32844e-11	169728916	0.02612	2871	1	CD62L on CD62L+ Dendritic Cell	prostate cancer	2.31305e-10	0.014714	42.8447
rs12921174	C	T	C	T	-0.2044	0.0054	0.2038	0.4377	16	430304	0.0085	0.5242	140254	61106	outcome	1.492e-09	430304	0.03371	2919	16	CD3 on CD45RA+ CD4+ T cell	prostate cancer	3.69753e-09	0.0135587	40.0944
rs2949661	T	C	T	C	0.6441	0.0114	0.4466	0.3684	1	167424924	0.0085	0.1775	140254	61106	outcome	1.65577e-133	167424924	0.02485	2919	1	CD3 on CD45RA+ CD4+ T cell	prostate cancer	3.08425e-133	0.205066	752.489
rs4657649	C	T	C	T	0.5386	-0.0198	0.0512	0.0937	1	167173140	0.0156	0.2049	140254	61106	outcome	1.51008e-18	167173140	0.06087	2919	1	CD3 on CD45RA+ CD4+ T cell	prostate cancer	1.38413e-17	0.0281843	84.598
rs61814886	A	G	A	G	0.3188	-0.0067	0.1059	0.1187	1	167136405	0.0126	0.5961	140254	61106	outcome	4.80507e-13	167136405	0.04389	2919	1	CD3 on CD45RA+ CD4+ T cell	prostate cancer	1.33487e-12	0.0192464	57.2434
rs79179998	A	G	A	G	0.2304	-0.0126	0.2093	0.1104	3	45947066	0.0131	0.3358	140254	61106	outcome	1.23197e-11	45947066	0.03386	2919	3	CD3 on CD45RA+ CD4+ T cell	prostate cancer	4.74496e-11	0.0175702	52.1688
rs7245846	A	G	A	G	-0.8358	0.0124	0.1853	0.3534	19	51731176	0.0085	0.1466	140254	61106	outcome	1.01601e-58	51731176	0.04903	1244	19	CD33 on Granulocytic Myeloid-Derived Suppressor Cells	prostate cancer	3.19433e-59	0.210915	331.975
rs7351079	G	A	G	A	-0.2821	0.0124	0.2544	0.1731	19	51574038	0.0106	0.2408	140254	61106	outcome	5.377e-09	51574038	0.048	1244	19	CD33 on Granulocytic Myeloid-Derived Suppressor Cells	prostate cancer	1.11285e-08	0.0301897	38.6629
rs78949787	T	C	T	C	0.2277	0.0066	0.5691	0.5297	19	51591138	0.0088	0.4514	140254	61106	outcome	3.21803e-08	51591138	0.04091	1244	19	CD33 on Granulocytic Myeloid-Derived Suppressor Cells	prostate cancer	5.14657e-08	0.0254285	32.4063
rs11669394	A	G	A	G	-0.2604	0.0129	0.3039	0.2636	19	53262327	0.0116	0.2658	140254	61106	outcome	4.21794e-11	53262327	0.0392	1558	19	CD33 on CD33dim HLA DR-	prostate cancer	1.06844e-10	0.0286889	45.9585
rs138712525	A	G	A	G	0.3426	0.0021	0.199	0.0959	19	51544665	0.0145	0.8835	140254	61106	outcome	1.22208e-13	51544665	0.04579	1558	19	CD33 on CD33dim HLA DR-	prostate cancer	1.5901e-13	0.0374188	60.4871
rs3865444	A	C	A	C	-1.138	0.0143	0.1845	0.3273	19	51727962	0.0086	0.0949992	140254	61106	outcome	2.60016e-145	51727962	0.03974	1558	19	CD33 on CD33dim HLA DR-	prostate cancer	7.1328e-152	0.389704	993.582
rs56043070	A	G	A	G	0.5006	-0.0057	0.0565	0.0605	1	247719769	0.0181	0.752501	140254	61106	outcome	2.25699e-10	247719769	0.0784	1558	1	CD33 on CD33dim HLA DR-	prostate cancer	3.22245e-10	0.0267179	42.7143
rs7351079	G	A	G	A	-0.3645	0.0124	0.258	0.1731	19	51574038	0.0106	0.2408	140254	61106	outcome	1.15398e-17	51574038	0.04209	1558	19	CD33 on CD33dim HLA DR-	prostate cancer	3.78312e-17	0.0508685	83.3934
rs75773078	A	G	A	G	-0.4918	-0.0102	0.0709	0.0762	19	51742145	0.0154	0.5076	140254	61106	outcome	4.11908e-12	51742145	0.07038	1558	19	CD33 on CD33dim HLA DR-	prostate cancer	7.8128e-12	0.0318651	51.2141
rs58027502	T	C	T	C	-0.2591	0.0156	0.1375	0.2337	5	139978241	0.0097	0.109	140254	61106	outcome	1.57217e-13	139978241	0.03497	3629	5	CD14 on CD14+ CD16- monocyte	prostate cancer	1.91409e-12	0.0159231	58.6874
rs111436326	T	C	T	C	0.4119	0.0768	0.034	0.0126	20	42701487	0.0376	0.0412202	140254	61106	outcome	2.627e-09	42701487	0.06902	3621	20	CD40 on CD14- CD16+ monocyte	prostate cancer	2.7292e-08	0.0111447	40.7873
rs148765873	C	T	C	T	-0.3497	0.0228	0.0453	0.0111	1	161221713	0.0409	0.5765	140254	61106	outcome	2.69302e-08	161221713	0.06275	3621	1	CD40 on CD14- CD16+ monocyte	prostate cancer	6.46682e-08	0.0105776	38.6895
rs1801274	G	A	G	A	0.5292	-0.0078	0.3264	0.5082	1	161479745	0.0082	0.3417	140254	61106	outcome	1.28914e-90	161479745	0.02548	3621	1	CD40 on CD14- CD16+ monocyte	prostate cancer	1.09184e-88	0.123146	508.257
rs34658867	C	A	C	A	0.4042	-0.0112	0.0456	0.0185	20	44977184	0.0378	0.7671	140254	61106	outcome	3.03529e-11	44977184	0.06064	3621	20	CD40 on CD14- CD16+ monocyte	prostate cancer	7.0338e-11	0.0142206	52.2068
rs6032212	A	G	A	G	0.189	-0.0227	0.1838	0.1135	20	44092448	0.0128	0.0753095	140254	61106	outcome	5.92598e-09	44092448	0.0324	3621	20	CD40 on CD14- CD16+ monocyte	prostate cancer	4.53847e-08	0.0107176	39.207
rs6687275	G	T	G	T	0.339	-0.022	0.2737	0.1708	1	161515638	0.0118	0.0628898	140254	61106	outcome	7.56484e-33	161515638	0.02812	3621	1	CD40 on CD14- CD16+ monocyte	prostate cancer	9.6028e-31	0.0456899	173.268
rs745307	A	G	A	G	0.7089	-0.0015	0.1464	0.2562	20	44747086	0.0093	0.8745	140254	61106	outcome	5.02921e-94	44747086	0.03346	3621	20	CD40 on CD14- CD16+ monocyte	prostate cancer	3.24282e-93	0.125602	519.846
rs77774351	G	C	G	C	0.374	0.0207	0.0358	0.0742	6	22713558	0.0157	0.1876	140254	61106	outcome	2.28502e-08	22713558	0.06677	3621	6	CD40 on CD14- CD16+ monocyte	prostate cancer	1.08053e-07	0.00965658	35.2879
rs1801274	G	A	G	A	0.2581	-0.0078	0.3209	0.5082	1	161479745	0.0082	0.3417	140254	61106	outcome	3.69063e-18	161479745	0.02951	2850	1	CCR2 on monocyte	prostate cancer	2.16161e-17	0.0290342	85.1619
rs4683184	A	G	A	G	0.3253	-0.0038	0.6884	0.6361	3	46187707	0.0084	0.6481	140254	61106	outcome	2.69215e-27	46187707	0.02975	2850	3	CCR2 on monocyte	prostate cancer	1.1953e-26	0.045398	135.442
rs11158593	A	G	A	G	0.1981	0	0.479	0.5185	14	65859984	0.0081	0.9959	140254	61106	outcome	6.8897e-13	65859984	0.02746	2910	14	CD4 on naive CD4+ T cell	prostate cancer	1.09381e-12	0.0195872	58.0975
rs139306421	G	C	G	C	-0.5447	0.0291	0.0234	0.035	6	109298437	0.0225	0.1971	140254	61106	outcome	3.23899e-09	109298437	0.09175	2910	6	CD4 on naive CD4+ T cell	prostate cancer	1.35417e-08	0.0135606	39.9762
rs17205675	G	C	G	C	-0.264	0.0069	0.2045	0.0166	6	32637489	0.0327	0.833	140254	61106	outcome	2.56702e-09	32637489	0.04418	2910	6	CD4 on naive CD4+ T cell	prostate cancer	4.31996e-09	0.0226763	67.4726
rs2844608	T	C	T	C	0.1993	0.0087	0.4574	0.3855	6	31247414	0.0081	0.2874	140254	61106	outcome	3.897e-10	31247414	0.03174	2910	6	CD4 on naive CD4+ T cell	prostate cancer	1.47583e-09	0.0197161	58.4875
rs3184504	C	T	C	T	-0.1576	0.0187	0.5296	0.5189	12	111884608	0.0082	0.0218102	140254	61106	outcome	4.80795e-08	111884608	0.02879	2910	12	CD4 on naive CD4+ T cell	prostate cancer	3.71325e-07	0.0123754	36.4385
rs62447171	A	G	A	G	-0.2093	0.0056	0.2426	0.2609	7	50309890	0.01	0.578699	140254	61106	outcome	2.84499e-10	50309890	0.03307	2871	7	CD80 on plasmacytoid Dendritic Cell	prostate cancer	6.81119e-10	0.0160985	46.9422
rs7658518	A	G	A	G	-0.2855	-0.0121	0.2941	0.2831	4	84160279	0.0092	0.1919	140254	61106	outcome	1.58198e-20	84160279	0.03051	2871	4	CD80 on plasmacytoid Dendritic Cell	prostate cancer	1.7312e-19	0.0338439	100.499
rs62447171	A	G	A	G	-0.2089	0.0056	0.2426	0.2609	7	50309890	0.01	0.578699	140254	61106	outcome	3.08702e-10	50309890	0.03307	2871	7	CD80 on CD62L+ plasmacytoid Dendritic Cell	prostate cancer	7.34261e-10	0.016037	46.76
rs7658518	A	G	A	G	-0.2821	-0.0121	0.2941	0.2831	4	84160279	0.0092	0.1919	140254	61106	outcome	4.45246e-20	84160279	0.03052	2871	4	CD80 on CD62L+ plasmacytoid Dendritic Cell	prostate cancer	4.77127e-19	0.0330426	98.0387
rs72677097	G	A	G	A	0.3805	0.0375	0.0861	0.0597	1	61134076	0.0182	0.0398804	140254	61106	outcome	1.163e-08	61134076	0.06635	1579	1	CD45 on CD33+ HLA DR+ CD14-	prostate cancer	4.65127e-08	0.0227846	36.7691
rs115752428	A	G	A	G	0.482	-0.0185	0.0226	0.0144	1	205560814	0.0345	0.592	140254	61106	outcome	1.47401e-08	205560814	0.08487	3113	1	SSC-A on T cell	prostate cancer	3.24286e-08	0.0102637	32.2616
rs116517602	T	C	T	C	1.147	-0.0148	0.0041	0.012	1	198922068	0.0421	0.725301	140254	61106	outcome	1.28899e-08	198922068	0.201	2910	1	CD45RA on naive CD8+ T cell	prostate cancer	2.31453e-08	0.0107438	31.5822
rs12712613	T	G	T	G	-0.1917	0.0193	0.4847	0.5253	2	38948860	0.0084	0.02133	140254	61106	outcome	9.12641e-13	38948860	0.02672	2910	2	CD45RA on naive CD8+ T cell	prostate cancer	1.46046e-11	0.0183572	54.3811
rs9267650	T	A	T	A	-0.3988	-0.006	0.2899	0.0453	6	31824912	0.0191	0.752	140254	61106	outcome	2.04692e-18	31824912	0.04502	1635	6	HLA DR on CD33- HLA DR+	prostate cancer	3.26736e-18	0.0654799	114.421
rs77741094	G	C	G	C	-0.627	0.0136	0.0126	0.031	21	42362418	0.0265	0.6093	140254	61106	outcome	42362418	21	3656	0.1131	3.13899e-08	IgD- CD38- B cell Absolute Count	prostate cancer	7.33394e-08	0.00978202	36.0966
rs115805162	T	C	T	C	-0.2265	-0.0042	0.2083	0.0657	1	161410253	0.0172	0.8093	140254	61106	outcome	161410253	1	3387	0.03229	2.75296e-12	Myeloid Dendritic Cell Absolute Count	prostate cancer	6.14498e-12	0.0169206	58.2621
rs71632979	G	A	G	A	0.6546	-0.0188	0.2449	0.1189	1	161526397	0.0135	0.1661	140254	61106	outcome	161526397	1	3387	0.02797	2.29087e-112	Myeloid Dendritic Cell Absolute Count	prostate cancer	2.01957e-110	0.15848	637.485
rs75072970	C	T	C	T	0.3859	-0.0113	0.0531	0.0425	1	161058351	0.0216	0.6026	140254	61106	outcome	161058351	1	3387	0.05732	1.93999e-11	Myeloid Dendritic Cell Absolute Count	prostate cancer	5.50618e-11	0.0149754	51.4624
rs10736092	G	A	G	A	0.9153	0.0045	0.4692	0.5424	10	97570315	0.0081	0.575999	140254	61106	outcome	97570315	10	3437	0.0203	1e-200	CD39+ activated CD4 regulatory T cell %CD4 regulatory T cell	prostate cancer	0	0.417298	2459.95
rs10786199	A	G	A	G	-0.1864	-0.0019	0.2888	0.4001	10	97069472	0.0083	0.8149	140254	61106	outcome	97069472	10	3437	0.02836	5.61177e-11	CD39+ activated CD4 regulatory T cell %CD4 regulatory T cell	prostate cancer	1.16554e-10	0.0142729	49.7371
rs10882701	C	A	C	A	-0.3538	-0.0017	0.5141	0.5719	10	97741071	0.009	0.8465	140254	61106	outcome	97741071	10	3437	0.02489	1.31613e-44	CD39+ activated CD4 regulatory T cell %CD4 regulatory T cell	prostate cancer	8.57859e-44	0.0625374	229.146
rs12268044	T	C	T	C	-0.1886	0.0098	0.3439	0.3899	10	98794615	0.0089	0.2683	140254	61106	outcome	98794615	10	3437	0.02672	2.04692e-12	CD39+ activated CD4 regulatory T cell %CD4 regulatory T cell	prostate cancer	1.15654e-11	0.0160515	56.0364
rs141018090	T	G	T	G	0.4456	0.0035	0.0528	0.0137	10	98169221	0.0391	0.9295	140254	61106	outcome	98169221	10	3437	0.05532	1.07597e-15	CD39+ activated CD4 regulatory T cell %CD4 regulatory T cell	prostate cancer	2.40817e-15	0.0198608	69.6041
rs72809762	T	C	T	C	0.3615	0.0026	0.0675	0.0354	10	97294154	0.0221	0.905	140254	61106	outcome	97294154	10	3437	0.05014	6.86278e-13	CD39+ activated CD4 regulatory T cell %CD4 regulatory T cell	prostate cancer	1.37974e-12	0.0164513	57.4553
rs11124653	A	C	A	C	0.1345	-0.0004	0.5909	0.6084	2	39112166	0.0083	0.9624	140254	61106	outcome	39112166	2	3427	0.02443	3.92202e-08	CD45RA- CD4+ T cell %CD4+ T cell	prostate cancer	5.85075e-08	0.00874617	30.2199
rs11579717	A	G	A	G	-1.081	0.011	0.0044	0.0434	1	199999121	0.0222	0.62	140254	61106	outcome	199999121	1	3427	0.1759	8.86993e-10	CD45RA- CD4+ T cell %CD4+ T cell	prostate cancer	2.18546e-09	0.0102381	35.4282
rs12712610	G	A	G	A	-0.1902	-0.0188	0.2969	0.1786	2	38897249	0.0113	0.0953301	140254	61106	outcome	38897249	2	3427	0.02599	3.13112e-13	CD45RA- CD4+ T cell %CD4+ T cell	prostate cancer	3.55394e-12	0.0151035	52.5229
rs146620586	T	G	T	G	-2.021	-0.0372	0.0032	0.0173	1	198524264	0.0373	0.3183	140254	61106	outcome	198524264	1	3427	0.2655	3.4578e-14	CD45RA- CD4+ T cell %CD4+ T cell	prostate cancer	2.06219e-13	0.0260568	91.6321
rs79251210	A	G	A	G	0.425	-0.0303	0.0379	0.0346	6	100468602	0.0231	0.19	140254	61106	outcome	100468602	6	3652	0.06368	2.86682e-11	CD8dim T cell Absolute Count	prostate cancer	1.94364e-10	0.0131725	48.7213
rs9916629	C	T	C	T	0.1339	-0.0029	0.5122	0.317	17	33796260	0.0089	0.7424	140254	61106	outcome	33796260	17	3652	0.02395	2.41102e-08	CD8dim T cell Absolute Count	prostate cancer	4.78869e-08	0.00895927	32.997
rs6755452	G	T	G	T	0.2426	-0.0043	0.1918	0.2475	2	87035076	0.0103	0.6736	140254	61106	outcome	87035076	2	3668	0.03049	2.32916e-15	CD4-CD8- T cell %T cell	prostate cancer	8.18924e-15	0.0182465	68.1348
rs79251210	A	G	A	G	0.3685	-0.0303	0.0378	0.0346	6	100468602	0.0231	0.19	140254	61106	outcome	100468602	6	3668	0.0638	8.3299e-09	CD4-CD8- T cell %T cell	prostate cancer	4.17856e-08	0.00987784	36.5734
rs115536607	T	C	T	C	0.3109	0.0275	0.0545	0.0411	6	101417409	0.02	0.1682	140254	61106	outcome	101417409	6	3669	0.05547	2.24502e-08	Natural Killer T %lymphocyte	prostate cancer	1.12729e-07	0.00996161	36.8968
rs117147408	G	A	G	A	0.5685	0.0222	0.0275	0.0233	6	101980039	0.0304	0.465799	140254	61106	outcome	101980039	6	3669	0.07776	3.23221e-13	Natural Killer T %lymphocyte	prostate cancer	1.41794e-12	0.0172867	64.5056
rs7218011	G	A	G	A	-0.1866	-0.002	0.1634	0.189	17	33773022	0.0106	0.8528	140254	61106	outcome	33773022	17	3669	0.03387	3.819e-08	Natural Killer T %lymphocyte	prostate cancer	6.65113e-08	0.0095197	35.2442
rs77738700	A	G	A	G	-0.4214	-0.0034	0.1067	0.0318	11	112751407	0.0261	0.8964	140254	61106	outcome	112751407	11	3669	0.03983	8.64172e-26	Natural Killer T %lymphocyte	prostate cancer	3.40533e-25	0.0338517	128.484
rs7819099	G	A	G	A	0.1488	-0.0006	0.5112	0.4214	8	144992862	0.0085	0.9441	140254	61106	outcome	144992862	8	3669	0.0251	3.34003e-09	Natural Killer T %lymphocyte	prostate cancer	5.51215e-09	0.0110652	41.03
rs79251210	A	G	A	G	0.4014	-0.0303	0.0377	0.0346	6	100468602	0.0231	0.19	140254	61106	outcome	100468602	6	3669	0.06656	1.789e-09	Natural Killer T %lymphocyte	prostate cancer	9.84436e-09	0.0116906	43.3765
rs9488834	A	G	A	G	0.3581	-0.0002	0.0465	0.0192	6	97889936	0.031	0.9954	140254	61106	outcome	97889936	6	3669	0.05971	2.20999e-09	Natural Killer T %lymphocyte	prostate cancer	3.44251e-09	0.0113714	42.1784
rs9912354	T	C	T	C	0.1443	0.0091	0.5271	0.3965	17	33805730	0.0086	0.2899	140254	61106	outcome	33805730	17	3669	0.02505	9.10207e-09	Natural Killer T %lymphocyte	prostate cancer	3.62027e-08	0.0103807	38.4652
rs115536607	T	C	T	C	0.3487	0.0275	0.0548	0.0411	6	101417409	0.02	0.1682	140254	61106	outcome	101417409	6	3652	0.05419	1.39601e-10	CD8dim Natural Killer T Absolute Count	prostate cancer	9.30588e-10	0.0125962	46.5625
rs117147408	G	A	G	A	0.6679	0.0222	0.0277	0.0233	6	101980039	0.0304	0.465799	140254	61106	outcome	101980039	6	3652	0.0755	1.37911e-18	CD8dim Natural Killer T Absolute Count	prostate cancer	9.07702e-18	0.0240288	89.8646
rs77738700	A	G	A	G	-0.3231	-0.0034	0.1069	0.0318	11	112751407	0.0261	0.8964	140254	61106	outcome	112751407	11	3652	0.03929	2.69215e-16	CD8dim Natural Killer T Absolute Count	prostate cancer	6.92598e-16	0.0199334	74.2368
rs79251210	A	G	A	G	0.5556	-0.0303	0.0379	0.0346	6	100468602	0.0231	0.19	140254	61106	outcome	100468602	6	3652	0.0646	1.15691e-17	CD8dim Natural Killer T Absolute Count	prostate cancer	1.55222e-16	0.022512	84.0611
rs9488834	A	G	A	G	0.3428	-0.0002	0.0465	0.0192	6	97889936	0.031	0.9954	140254	61106	outcome	97889936	6	3652	0.05826	4.39602e-09	CD8dim Natural Killer T Absolute Count	prostate cancer	6.71421e-09	0.0104204	38.435
rs9916257	T	G	T	G	0.1472	0.0065	0.5685	0.4305	17	33797371	0.0085	0.4467	140254	61106	outcome	33797371	17	3652	0.02455	2.201e-09	CD8dim Natural Killer T Absolute Count	prostate cancer	7.15864e-09	0.0106306	39.2185
rs115536607	T	C	T	C	0.3865	0.0275	0.0545	0.0411	6	101417409	0.02	0.1682	140254	61106	outcome	101417409	6	3668	0.05433	1.34896e-12	CD8dim Natural Killer T %lymphocyte	prostate cancer	1.15022e-11	0.0153953	57.3215
rs117147408	G	A	G	A	0.7078	0.0222	0.0275	0.0233	6	101980039	0.0304	0.465799	140254	61106	outcome	101980039	6	3668	0.07572	1.50591e-20	CD8dim Natural Killer T %lymphocyte	prostate cancer	1.14994e-19	0.0267962	100.94
rs77738700	A	G	A	G	-0.3205	-0.0034	0.1067	0.0318	11	112751407	0.0261	0.8964	140254	61106	outcome	112751407	11	3668	0.03937	5.3765e-16	CD8dim Natural Killer T %lymphocyte	prostate cancer	1.34401e-15	0.0195816	73.2198
rs79251210	A	G	A	G	0.5857	-0.0303	0.0378	0.0346	6	100468602	0.0231	0.19	140254	61106	outcome	100468602	6	3668	0.06479	2.47002e-19	CD8dim Natural Killer T %lymphocyte	prostate cancer	3.93113e-18	0.0249539	93.822
rs9488834	A	G	A	G	0.3457	-0.0002	0.0465	0.0192	6	97889936	0.031	0.9954	140254	61106	outcome	97889936	6	3668	0.05842	3.57298e-09	CD8dim Natural Killer T %lymphocyte	prostate cancer	5.52367e-09	0.0105975	39.2665
rs9916257	T	G	T	G	0.1437	0.0065	0.5684	0.4305	17	33797371	0.0085	0.4467	140254	61106	outcome	33797371	17	3668	0.02463	5.79202e-09	CD8dim Natural Killer T %lymphocyte	prostate cancer	1.82431e-08	0.0101316	37.5227
rs12874404	G	A	G	A	0.2272	-0.0188	0.319	0.0595	13	108993494	0.0193	0.3308	140254	61106	outcome	108993494	13	3669	0.02633	8.99498e-18	B cell %lymphocyte	prostate cancer	7.87281e-17	0.0224277	84.1291
rs66777340	T	C	T	C	-0.1493	0.0066	0.4842	0.4808	17	2716327	0.0082	0.4235	140254	61106	outcome	2716327	17	3669	0.02419	7.62904e-10	B cell %lymphocyte	prostate cancer	2.63165e-09	0.0111341	41.2885
rs113435341	G	A	G	A	2.157	-0.0424	0.0032	0.0194	1	198151688	0.0318	0.1815	140254	61106	outcome	198151688	1	3440	0.2061	2.96415e-25	CD28+ CD45RA+ CD8dim T cell %T cell	prostate cancer	6.91008e-24	0.0296817	105.167
rs11579717	A	G	A	G	1.303	0.011	0.0044	0.0434	1	199999121	0.0222	0.62	140254	61106	outcome	199999121	1	3440	0.1744	1.01508e-13	CD28+ CD45RA+ CD8dim T cell %T cell	prostate cancer	3.24309e-13	0.014875	51.9124
rs116794175	C	T	C	T	1.164	-0.0242	0.0042	0.0063	1	194010208	0.0618	0.696	140254	61106	outcome	194010208	1	3440	0.1805	1.30101e-10	CD28+ CD45RA+ CD8dim T cell %T cell	prostate cancer	3.03662e-10	0.0113333	39.4106
rs12712610	G	A	G	A	0.1724	-0.0188	0.2977	0.1786	2	38897249	0.0113	0.0953301	140254	61106	outcome	38897249	2	3440	0.02569	2.273e-11	CD28+ CD45RA+ CD8dim T cell %T cell	prostate cancer	2.05231e-10	0.0124281	43.2656
rs4832054	A	G	A	G	0.1726	-0.0019	0.243	0.3171	2	87058580	0.0098	0.848	140254	61106	outcome	87058580	2	3440	0.02712	2.208e-10	CD28+ CD45RA+ CD8dim T cell %T cell	prostate cancer	4.25022e-10	0.0109601	38.0983
rs79827501	T	G	T	G	-0.267	-0.0227	0.0731	0.0409	2	38431267	0.021	0.2808	140254	61106	outcome	38431267	2	3440	0.04503	3.34103e-09	CD28+ CD45RA+ CD8dim T cell %T cell	prostate cancer	1.34642e-08	0.00966057	33.537
rs11579717	A	G	A	G	-1.217	0.011	0.0044	0.0434	1	199999121	0.0222	0.62	140254	61106	outcome	199999121	1	3440	0.1857	6.36356e-11	CD28+ CD45RA- CD8dim T cell %CD8dim T cell	prostate cancer	1.72806e-10	0.0129762	45.1988
rs146620586	T	G	T	G	-2.425	-0.0372	0.0032	0.0173	1	198524264	0.0373	0.3183	140254	61106	outcome	198524264	1	3440	0.2802	7.43875e-18	CD28+ CD45RA- CD8dim T cell %CD8dim T cell	prostate cancer	6.05408e-17	0.0375156	134.006
rs11818051	T	C	T	C	0.6977	0.029	0.0317	0.0119	10	97972294	0.0429	0.4987	140254	61106	outcome	97972294	10	3440	0.07403	7.7464e-21	CD39+ CD8+ T cell %CD8+ T cell	prostate cancer	4.92597e-20	0.0298839	105.906
rs12778618	C	T	C	T	0.8186	0.1223	0.0462	0.0151	10	95633120	0.0395	0.001942	140254	61106	outcome	95633120	10	3440	0.06103	5.06524e-40	CD39+ CD8+ T cell %CD8+ T cell	prostate cancer	1.01062e-36	0.0590572	215.782
rs146426185	C	A	C	A	-0.3008	-0.0576	0.0635	0.0207	10	99452494	0.034	0.09007	140254	61106	outcome	99452494	10	3440	0.05314	1.639e-08	CD39+ CD8+ T cell %CD8+ T cell	prostate cancer	1.03235e-07	0.0107614	37.4
rs17111341	C	T	C	T	0.6402	0.0695	0.0667	0.0188	10	97881031	0.0316	0.0276802	140254	61106	outcome	97881031	10	3440	0.05184	2.58881e-34	CD39+ CD8+ T cell %CD8+ T cell	prostate cancer	5.53443e-32	0.051028	184.868
rs2901833	A	G	A	G	0.2205	-0.0119	0.383	0.3926	10	96998591	0.0083	0.1504	140254	61106	outcome	96998591	10	3440	0.02662	1.73301e-16	CD39+ CD8+ T cell %CD8+ T cell	prostate cancer	2.12757e-15	0.022979	80.8599
rs72812685	A	G	A	G	0.6238	-0.0101	0.0483	0.0631	10	95845989	0.018	0.5739	140254	61106	outcome	95845989	10	3440	0.05887	7.75354e-26	CD39+ CD8+ T cell %CD8+ T cell	prostate cancer	5.47307e-25	0.035774	127.554
rs12212931	G	T	G	T	0.2233	-0.0027	0.8197	0.8267	6	15913304	0.0106	0.798	140254	61106	outcome	15913304	6	3658	0.03173	2.32809e-12	CD20 on IgD+ B cell	prostate cancer	5.5626e-12	0.0147387	54.6906
rs72836542	T	C	T	C	0.1521	0.0062	0.3162	0.2799	6	14091682	0.0089	0.4856	140254	61106	outcome	14091682	6	3658	0.02688	1.63799e-08	CD20 on IgD+ B cell	prostate cancer	4.5964e-08	0.0100041	36.9447
rs7939177	T	C	T	C	-0.1877	0.006	0.6102	0.5387	11	60266070	0.0082	0.4667	140254	61106	outcome	60266070	11	3657	0.02497	7.11541e-14	CD20 on transitional B cell	prostate cancer	3.23167e-13	0.0167599	62.3018
rs879299	G	T	G	T	0.287	-0.0042	0.8198	0.8268	6	15897007	0.0107	0.693999	140254	61106	outcome	15897007	6	3657	0.03212	6.36063e-19	CD20 on transitional B cell	prostate cancer	2.6496e-18	0.0243364	91.1683
rs149662107	A	G	A	G	-0.9269	0.0849	0.0062	0.0103	7	47871972	0.0485	0.0801401	140254	61106	outcome	47871972	7	3657	0.1592	6.267e-09	CD25 on IgD+ CD38dim B cell	prostate cancer	4.78095e-08	0.0105873	39.1108
rs62626323	A	C	A	C	0.5433	-0.0034	0.1075	0.0494	10	6115678	0.0184	0.8539	140254	61106	outcome	6115678	10	3657	0.04021	1.25285e-40	CD25 on IgD+ CD38dim B cell	prostate cancer	8.8853e-40	0.0566404	219.45
rs7920946	C	T	C	T	0.1545	0.0087	0.2773	0.2993	10	6074634	0.0087	0.3202	140254	61106	outcome	6074634	10	3657	0.02812	4.14801e-08	CD25 on IgD+ CD38dim B cell	prostate cancer	1.46759e-07	0.00956742	35.3067
rs76112278	A	G	A	G	-0.6069	0.0179	0.0194	0.0119	4	15915069	0.0432	0.6784	140254	61106	outcome	15915069	4	3658	0.09018	1.96698e-11	CD38 on IgD+ B cell	prostate cancer	5.26382e-11	0.0140139	51.9629
rs139084170	A	C	A	C	0.3794	0.1035	0.0523	0.014	6	43351686	0.0363	0.00439198	140254	61106	outcome	43351686	6	3636	0.05758	5.09214e-11	IgD on unswitched memory B cell	prostate cancer	1.55515e-09	0.0142691	52.6046
rs28723652	A	C	A	C	0.4108	-0.0065	0.0443	0.0778	14	106644507	0.0252	0.7962	140254	61106	outcome	106644507	14	3636	0.07319	2.151e-08	IgD on unswitched memory B cell	prostate cancer	3.97965e-08	0.0142895	52.6807
rs709589	T	C	T	C	-0.5907	0.0005	0.4567	0.4292	14	106306841	0.0123	0.9698	140254	61106	outcome	106306841	14	3636	0.0302	4.3132e-81	IgD on unswitched memory B cell	prostate cancer	2.57837e-80	0.173155	761.019
rs9267517	A	G	A	G	-0.2671	-0.034	0.2446	0.0119	6	31573110	0.0373	0.362	140254	61106	outcome	31573110	6	3636	0.03579	1.05512e-13	IgD on unswitched memory B cell	prostate cancer	5.86381e-13	0.026364	98.401
rs6693963	G	C	G	C	0.3461	-0.0026	0.176	0.1397	1	169685445	0.0117	0.8234	140254	61106	outcome	169685445	1	2872	0.03444	2.24595e-23	CD62L on CD62L+ myeloid Dendritic Cell	prostate cancer	6.36122e-23	0.0347435	103.303
rs4987369	T	G	T	G	-0.4474	0.0045	0.279	0.3091	1	169662742	0.0087	0.6035	140254	61106	outcome	169662742	1	2848	0.02945	3.50833e-50	CD62L on monocyte	prostate cancer	2.34434e-49	0.0805307	249.264
rs2988277	T	C	T	C	0.4749	0.0097	0.4462	0.3659	1	167431352	0.0084	0.2511	140254	61106	outcome	167431352	1	2919	0.02583	1.6099e-71	CD3 on CD28+ CD4+ T cell	prostate cancer	4.56381e-70	0.111459	365.911
rs4657649	C	T	C	T	0.4331	-0.0198	0.0512	0.0937	1	167173140	0.0156	0.2049	140254	61106	outcome	167173140	1	2919	0.0606	1.11609e-12	CD3 on CD28+ CD4+ T cell	prostate cancer	6.38084e-12	0.0182243	54.1471
rs12128145	C	T	C	T	-0.2005	-0.005	0.5427	0.4753	1	167116924	0.008	0.5364	140254	61106	outcome	167116924	1	2919	0.02744	3.48097e-13	CD3 on CD28+ CD45RA+ CD8+ T cell	prostate cancer	1.0813e-12	0.0199535	59.3895
rs12138291	A	G	A	G	-0.2709	0.0095	0.1482	0.235	1	166464476	0.0098	0.3318	140254	61106	outcome	166464476	1	2919	0.03832	1.93108e-12	CD3 on CD28+ CD45RA+ CD8+ T cell	prostate cancer	8.04854e-12	0.0185282	55.0671
rs4657649	C	T	C	T	0.447	-0.0198	0.0512	0.0937	1	167173140	0.0156	0.2049	140254	61106	outcome	167173140	1	2919	0.06122	3.64083e-13	CD3 on CD28+ CD45RA+ CD8+ T cell	prostate cancer	2.17797e-12	0.0194129	57.7484
rs2988279	A	G	A	G	0.2396	0.0123	0.4849	0.3928	1	167419839	0.0084	0.1434	140254	61106	outcome	167419839	1	2919	0.02713	1.75388e-18	CD3 on CD28- CD8+ T cell	prostate cancer	2.02781e-17	0.0286779	86.1233
rs4689428	G	C	G	C	-0.186	0.0035	0.2052	0.3151	4	6388191	0.0092	0.7072	140254	61106	outcome	6388191	4	2919	0.03384	4.21396e-08	CD3 on CD28- CD8+ T cell	prostate cancer	7.63202e-08	0.0112847	33.2933
rs1723018	G	A	G	A	0.3496	0.0105	0.4569	0.378	1	167433420	0.0083	0.206	140254	61106	outcome	167433420	1	2914	0.02643	7.81988e-39	CD3 on CD39+ CD8+ T cell	prostate cancer	2.06892e-37	0.060656	188.036
rs41289614	T	C	T	C	0.1883	-0.0161	0.1961	0.0914	3	45972492	0.0143	0.2589	140254	61106	outcome	45972492	3	2919	0.03418	3.94303e-08	CD3 on CD4+ T cell	prostate cancer	1.28023e-07	0.0111792	32.9784
rs4657649	C	T	C	T	0.4334	-0.0198	0.0512	0.0937	1	167173140	0.0156	0.2049	140254	61106	outcome	167173140	1	2919	0.06029	8.31189e-13	CD3 on CD4+ T cell	prostate cancer	4.78516e-12	0.0182496	54.2235
rs1886730	C	T	C	T	0.2864	0.015	0.5778	0.4875	1	2488608	0.0085	0.0779202	140254	61106	outcome	2488608	1	1247	0.03948	7.00164e-13	HVEM on T cell	prostate cancer	2.48644e-12	0.0400195	51.9014
rs1886730	C	T	C	T	0.3004	0.015	0.5778	0.4875	1	2488608	0.0085	0.0779202	140254	61106	outcome	2488608	1	1247	0.03886	2.1722e-14	HVEM on CD45RA- CD4+ T cell	prostate cancer	8.17643e-14	0.0440277	57.3389
rs13390252	G	A	G	A	-0.4805	0.0102	0.199	0.1681	2	204596729	0.0109	0.3497	140254	61106	outcome	204596729	2	2920	0.03356	5.57442e-45	CD28 on CD45RA- CD4 not regulatory T cell	prostate cancer	9.08383e-44	0.0736042	231.841
rs59639671	T	C	T	C	0.1962	-0.0074	0.1779	0.0788	2	39003961	0.0164	0.650401	140254	61106	outcome	39003961	2	2920	0.03583	4.69699e-08	CD28 on CD45RA- CD4 not regulatory T cell	prostate cancer	9.03106e-08	0.0112597	33.2301
rs72923074	T	A	T	A	0.1766	-0.0217	0.3315	0.272	2	203112661	0.0092	0.0187901	140254	61106	outcome	203112661	2	2920	0.02916	1.59001e-09	CD28 on CD45RA- CD4 not regulatory T cell	prostate cancer	1.66107e-08	0.0138228	40.9003
rs17187559	T	A	T	A	-0.2395	0.0153	0.1279	0.0429	2	204650926	0.021	0.4668	140254	61106	outcome	204650926	2	2920	0.0422	1.521e-08	CD28 on CD28+ CD45RA+ CD8+ T cell	prostate cancer	3.75504e-08	0.0127961	37.823
rs72928038	A	G	A	G	0.5885	-0.0015	0.199	0.1658	6	90976768	0.0119	0.9004	140254	61106	outcome	90976768	6	2920	0.03315	5.13334e-67	CD28 on CD28+ CD45RA+ CD8+ T cell	prostate cancer	1.15703e-66	0.11041	362.163
rs78307830	C	G	C	G	0.4819	-0.0369	0.0567	0.0104	2	204596768	0.0414	0.373	140254	61106	outcome	204596768	2	2920	0.06136	5.63638e-15	CD28 on CD28+ CD45RA+ CD8+ T cell	prostate cancer	2.58531e-14	0.0248414	74.3339
rs183053322	T	C	T	C	0.5102	0.0052	0.0357	0.0124	1	25076059	0.0443	0.9059	140254	61106	outcome	25076059	1	3113	0.07408	6.88177e-12	CD45 on Natural Killer	prostate cancer	1.23154e-11	0.0179222	56.7735
rs6721978	C	T	C	T	0.2237	-0.0009	0.3466	0.2597	2	232290157	0.0098	0.9307	140254	61106	outcome	232290157	2	3113	0.02785	1.34215e-15	CD45 on Natural Killer	prostate cancer	2.72909e-15	0.0226657	72.1484
rs116030815	C	T	C	T	-3.125	0.03	0.0005	0.0112	1	42691989	0.0405	0.4592	140254	61106	outcome	42691989	1	3113	0.5674	3.925e-08	CD45 on CD8+ T cell	prostate cancer	9.8906e-08	0.00976074	30.665
rs7559619	G	A	G	A	0.1424	0.0146	0.345	0.3814	2	38892207	0.0088	0.0993299	140254	61106	outcome	38892207	2	3113	0.02589	4.05397e-08	CD45 on CD8+ T cell	prostate cancer	2.14635e-07	0.00916453	28.7746
rs10905719	A	G	A	G	0.2281	0.0172	0.2083	0.3151	10	6115171	0.0085	0.0425804	140254	61106	outcome	6115171	10	3435	0.02982	2.56094e-14	CD25 on CD45RA+ CD4 not regulatory T cell	prostate cancer	5.11588e-13	0.0171605	59.9407
rs9357097	T	C	T	C	0.1669	-0.0162	0.476	0.252	6	30285121	0.0092	0.0782402	140254	61106	outcome	30285121	6	3060	0.02793	2.57199e-09	CD4 on HLA DR+ CD4+ T cell	prostate cancer	1.68101e-08	0.0138957	43.0919
rs142456232	T	C	T	C	-0.3287	0.0191	0.0572	0.0214	11	4960640	0.0288	0.5055	140254	61106	outcome	4960640	11	3112	0.05796	1.546e-08	FSC-A on CD14+ monocyte	prostate cancer	3.77358e-08	0.0116532	36.6687
rs2569177	T	G	T	G	0.1645	0.0035	0.3057	0.2969	5	139992162	0.009	0.6982	140254	61106	outcome	139992162	5	3618	0.02658	6.78094e-10	CD14 on CD14+ CD16+ monocyte	prostate cancer	1.56628e-09	0.0114869	42.0195
rs6671847	A	G	A	G	0.1769	-0.0049	0.2995	0.4834	1	161478810	0.0082	0.5486	140254	61106	outcome	161478810	1	3618	0.02681	4.70111e-11	CD14 on CD14+ CD16+ monocyte	prostate cancer	1.4916e-10	0.0131308	48.1127
rs143407337	T	C	T	C	0.2439	-0.0357	0.2142	0.0389	7	1095701	0.0243	0.1415	140254	61106	outcome	1095701	7	2871	0.03399	9.16854e-13	CCR2 on plasmacytoid Dendritic Cell	prostate cancer	6.28228e-12	0.0200256	58.6274
rs3092963	G	A	G	A	-0.4405	-0.0034	0.4183	0.3078	3	46396938	0.0089	0.705801	140254	61106	outcome	46396938	3	2871	0.02745	1.44611e-55	CCR2 on plasmacytoid Dendritic Cell	prostate cancer	7.23207e-55	0.0944297	299.169
rs11615628	A	G	A	G	-0.3219	0.0124	0.2464	0.2929	12	6903631	0.0096	0.1981	140254	61106	outcome	6903631	12	2912	0.03112	1.20504e-24	CD4 on Effector Memory CD4+ T cell	prostate cancer	1.67561e-23	0.0384816	116.463
rs3129267	G	C	G	C	-0.2205	-0.0135	0.7735	0.6744	6	33098896	0.0085	0.1121	140254	61106	outcome	33098896	6	2912	0.03358	6.02976e-11	CD4 on Effector Memory CD4+ T cell	prostate cancer	3.95242e-10	0.0170363	50.4349
rs10882701	C	A	C	A	-0.1936	-0.0017	0.5153	0.5719	10	97741071	0.009	0.8465	140254	61106	outcome	97741071	10	2915	0.02737	1.87284e-12	CD39 on CD39+ CD8+ T cell	prostate cancer	3.57335e-12	0.0187229	55.5805
rs2901833	A	G	A	G	0.1839	-0.0119	0.3851	0.3926	10	96998591	0.0083	0.1504	140254	61106	outcome	96998591	10	2915	0.02761	3.21884e-11	CD39 on CD39+ CD8+ T cell	prostate cancer	1.8864e-10	0.0160166	47.4159
rs3020726	G	A	G	A	-0.4218	-0.003	0.1385	0.152	2	87016506	0.0126	0.8119	140254	61106	outcome	87016506	2	2910	0.03923	1.83485e-26	CD8 on Central Memory CD8+ T cell	prostate cancer	5.81917e-26	0.0424569	128.939
rs4081559	T	C	T	C	0.2638	-0.0352	0.4301	0.1265	6	31323677	0.0121	0.00347096	140254	61106	outcome	31323677	6	2910	0.03032	5.43876e-18	CD8 on Central Memory CD8+ T cell	prostate cancer	3.38393e-16	0.0341152	102.711
rs9468618	T	C	T	C	-0.2443	0.0237	0.182	0.0825	6	29750776	0.0143	0.0966897	140254	61106	outcome	29750776	6	2910	0.03893	4.02198e-10	CD8 on Central Memory CD8+ T cell	prostate cancer	2.51998e-09	0.0177706	52.6118
rs3020726	G	A	G	A	-0.5196	-0.003	0.1412	0.152	2	87016506	0.0126	0.8119	140254	61106	outcome	87016506	2	3113	0.03725	6.08836e-43	CD8 on CD8+ T cell	prostate cancer	3.05889e-42	0.0654779	217.974
rs111856689	T	C	T	C	-0.3425	-0.0174	0.0536	0.0159	10	97296629	0.036	0.6303	140254	61106	outcome	97296629	10	2920	0.06228	4.15298e-08	CD4 on CD39+ CD4+ T cell	prostate cancer	8.15048e-08	0.0119012	35.146
rs117458836	A	G	A	G	0.8979	-0.0367	0.0187	0.0132	10	96773382	0.0387	0.3426	140254	61106	outcome	96773382	10	2920	0.1053	2.34315e-17	CD4 on CD39+ CD4+ T cell	prostate cancer	1.359e-16	0.0295889	88.9731
rs12778618	C	T	C	T	0.5908	0.1223	0.0457	0.0151	10	95633120	0.0395	0.001942	140254	61106	outcome	95633120	10	2920	0.06675	1.47401e-18	CD4 on CD39+ CD4+ T cell	prostate cancer	1.25121e-16	0.0304447	91.6273
rs4293064	A	C	A	C	0.2681	-0.013	0.0884	0.0644	10	107757380	0.0171	0.4489	140254	61106	outcome	107757380	10	2920	0.04886	4.45205e-08	CD4 on CD39+ CD4+ T cell	prostate cancer	1.08322e-07	0.0115846	34.2
rs7084635	G	A	G	A	0.1809	0.0124	0.7288	0.5883	10	97062753	0.0092	0.1794	140254	61106	outcome	97062753	10	2920	0.03114	6.90399e-09	CD4 on CD39+ CD4+ T cell	prostate cancer	2.93339e-08	0.0129362	38.2424
rs7086986	G	A	G	A	0.4907	0.0043	0.4728	0.5423	10	97507312	0.0081	0.598199	140254	61106	outcome	97507312	10	2920	0.0262	5.67545e-74	CD4 on CD39+ CD4+ T cell	prostate cancer	2.87333e-73	0.120037	398.048
rs12924236	C	G	C	G	0.2199	-0.0016	0.2263	0.2382	16	10974423	0.01	0.869	140254	61106	outcome	10974423	16	3060	0.03124	2.35613e-12	SSC-A on HLA DR+ T cell	prostate cancer	4.50379e-12	0.0169331	52.6735
rs111359007	A	T	A	T	-0.2802	0.0011	0.1015	0.0208	6	31761201	0.0279	0.9696	140254	61106	outcome	31761201	6	2915	0.04787	5.34195e-09	CD8 on CD39+ CD8+ T cell	prostate cancer	7.66774e-09	0.0143202	42.3209
rs117519014	A	C	A	C	0.4352	-0.0268	0.0427	0.048	10	97403248	0.019	0.1588	140254	61106	outcome	97403248	10	2915	0.06661	7.57356e-11	CD8 on CD39+ CD8+ T cell	prostate cancer	4.13623e-10	0.015484	45.8143
rs17197199	T	C	T	C	-0.2839	-0.0225	0.1266	0.0327	6	31138472	0.0224	0.3139	140254	61106	outcome	31138472	6	2915	0.04341	7.21274e-11	CD8 on CD39+ CD8+ T cell	prostate cancer	2.73657e-10	0.0178241	52.8639
rs72847706	C	T	C	T	-0.2551	-0.0011	0.228	0.3164	2	87055981	0.0098	0.9063	140254	61106	outcome	87055981	2	2915	0.03189	1.79597e-15	CD8 on CD39+ CD8+ T cell	prostate cancer	3.50324e-15	0.0229088	68.2981
rs9357097	T	C	T	C	0.1925	-0.0162	0.4762	0.252	6	30285121	0.0092	0.0782402	140254	61106	outcome	30285121	6	2915	0.02804	8.08165e-12	CD8 on CD39+ CD8+ T cell	prostate cancer	6.82171e-11	0.0184861	54.8644
rs115805162	T	C	T	C	-0.2709	-0.0042	0.2083	0.0657	1	161410253	0.0172	0.8093	140254	61106	outcome	1	161410253	0.03229	3387	7.20112e-17	CD62L- Dendritic Cell Absolute Count	prostate cancer	1.98455e-16	0.0242046	83.9649
rs191217950	A	G	A	G	0.7543	0.0406	0.0096	0.0139	1	160940671	0.0374	0.277	140254	61106	outcome	1	160940671	0.1293	3387	5.90405e-09	CD62L- Dendritic Cell Absolute Count	prostate cancer	2.30362e-08	0.0108193	37.024
rs71632979	G	A	G	A	0.7524	-0.0188	0.2449	0.1189	1	161526397	0.0135	0.1661	140254	61106	outcome	1	161526397	0.02735	3387	1.40281e-150	CD62L- Dendritic Cell Absolute Count	prostate cancer	1.58962e-149	0.209373	896.412
rs71639910	A	G	A	G	0.3586	-0.014	0.0686	0.0287	1	161937774	0.0254	0.5806	140254	61106	outcome	1	161937774	0.05081	3387	2.04692e-12	CD62L- Dendritic Cell Absolute Count	prostate cancer	6.35699e-12	0.0164328	56.5543
rs75072970	C	T	C	T	0.4289	-0.0113	0.0531	0.0425	1	161058351	0.0216	0.6026	140254	61106	outcome	1	161058351	0.05742	3387	1.01789e-13	CD62L- Dendritic Cell Absolute Count	prostate cancer	3.35072e-13	0.0184987	63.7982
rs138915779	A	C	A	C	1.439	0.0528	0.0035	0.0162	1	190079170	0.035	0.1315	140254	61106	outcome	1	190079170	0.2131	3437	1.72108e-11	Resting CD4 regulatory T cell %CD4+ T cell	prostate cancer	1.33914e-10	0.0144443	50.3434
rs141066700	G	A	G	A	0.7007	-0.0006	0.0093	0.0147	1	193453479	0.0371	0.9873	140254	61106	outcome	1	193453479	0.1171	3437	2.43501e-09	Resting CD4 regulatory T cell %CD4+ T cell	prostate cancer	3.67365e-09	0.00904731	31.3612
rs147071297	A	G	A	G	1.123	-0.0531	0.0039	0.017	1	191648600	0.0342	0.1205	140254	61106	outcome	1	191648600	0.1849	3437	1.40001e-09	Resting CD4 regulatory T cell %CD4+ T cell	prostate cancer	8.97995e-09	0.00979844	33.9907
rs17583875	A	G	A	G	2.309	-0.0122	0.0029	0.0252	1	197924770	0.0286	0.6697	140254	61106	outcome	1	197924770	0.2094	3437	8.26228e-28	Resting CD4 regulatory T cell %CD4+ T cell	prostate cancer	5.12499e-27	0.0308329	109.28
rs408686	A	C	A	C	-0.2655	0.0057	0.8142	0.9181	2	39177320	0.0157	0.716401	140254	61106	outcome	2	39177320	0.03044	3437	4.21988e-18	Resting CD4 regulatory T cell %CD4+ T cell	prostate cancer	1.48452e-17	0.0213273	74.8557
rs6751481	C	T	C	T	0.2762	-0.0051	0.4709	0.5181	2	38897810	0.0083	0.5413	140254	61106	outcome	2	38897810	0.0232	3437	4.7841e-32	Resting CD4 regulatory T cell %CD4+ T cell	prostate cancer	4.85635e-31	0.038014	135.738
rs10882701	C	A	C	A	-0.3593	-0.0017	0.5141	0.5719	10	97741071	0.009	0.8465	140254	61106	outcome	10	97741071	0.02438	3437	1.07994e-47	CD39+ resting CD4 regulatory T cell %CD4 regulatory T cell	prostate cancer	6.93102e-47	0.0644969	236.821
rs11188757	C	A	C	A	-0.182	0.0069	0.2207	0.2947	10	98205222	0.009	0.443	140254	61106	outcome	10	98205222	0.03048	3437	2.59597e-09	CD39+ resting CD4 regulatory T cell %CD4 regulatory T cell	prostate cancer	7.93628e-09	0.0113941	39.5898
rs113435341	G	A	G	A	2.267	-0.0424	0.0032	0.0194	1	198151688	0.0318	0.1815	140254	61106	outcome	1	198151688	0.2171	3437	3.79315e-25	CD39+ resting CD4 regulatory T cell %CD4 regulatory T cell	prostate cancer	8.71255e-24	0.0327862	116.438
rs11579717	A	G	A	G	1.718	0.011	0.0044	0.0434	1	199999121	0.0222	0.62	140254	61106	outcome	1	199999121	0.1835	3437	1.35114e-20	CD39+ resting CD4 regulatory T cell %CD4 regulatory T cell	prostate cancer	6.66227e-20	0.0258591	91.184
rs116794175	C	T	C	T	1.311	-0.0242	0.0042	0.0063	1	194010208	0.0618	0.696	140254	61106	outcome	1	194010208	0.1905	3437	6.98232e-12	CD39+ resting CD4 regulatory T cell %CD4 regulatory T cell	prostate cancer	1.7912e-11	0.0143766	50.104
rs11890666	A	G	A	G	-0.1612	-0.0057	0.2866	0.2085	2	38745822	0.01	0.568801	140254	61106	outcome	2	38745822	0.02787	3437	7.94292e-09	CD39+ resting CD4 regulatory T cell %CD4 regulatory T cell	prostate cancer	1.95115e-08	0.010626	36.8923
rs12712610	G	A	G	A	0.201	-0.0188	0.2975	0.1786	2	38897249	0.0113	0.0953301	140254	61106	outcome	2	38897249	0.02719	3437	1.82684e-13	CD39+ resting CD4 regulatory T cell %CD4 regulatory T cell	prostate cancer	2.12442e-12	0.0168871	59.0036
rs12777195	G	A	G	A	0.1965	-0.012	0.3595	0.3923	10	96998743	0.0083	0.1469	140254	61106	outcome	10	96998743	0.02651	3437	1.55704e-13	CD39+ resting CD4 regulatory T cell %CD4 regulatory T cell	prostate cancer	1.44956e-12	0.0177817	62.1859
rs1923692	G	T	G	T	-0.5496	0.0217	0.9453	0.9767	10	98173715	0.0325	0.5047	140254	61106	outcome	10	98173715	0.05289	3437	6.37236e-25	CD39+ resting CD4 regulatory T cell %CD4 regulatory T cell	prostate cancer	5.05487e-24	0.0312378	110.762
rs192831774	T	A	T	A	0.5247	-0.0194	0.0313	0.0099	10	95387682	0.0536	0.7173	140254	61106	outcome	10	95387682	0.07138	3437	2.46093e-13	CD39+ resting CD4 regulatory T cell %CD4 regulatory T cell	prostate cancer	6.64674e-13	0.016695	58.3209
rs4918969	A	G	A	G	0.8426	0.0089	0.4267	0.4942	10	97562938	0.0081	0.2706	140254	61106	outcome	10	97562938	0.02078	3437	1e-200	CD39+ resting CD4 regulatory T cell %CD4 regulatory T cell	prostate cancer	2.26866e-303	0.347358	1828.22
rs72809757	G	A	G	A	0.5051	0.0229	0.0588	0.0246	10	97285715	0.0262	0.3819	140254	61106	outcome	10	97285715	0.05255	3437	1.32892e-21	CD39+ resting CD4 regulatory T cell %CD4 regulatory T cell	prostate cancer	1.18905e-20	0.0282387	99.8185
rs11256966	G	C	G	C	-0.1567	0.0196	0.3848	0.2189	10	6185310	0.0101	0.0512696	140254	61106	outcome	10	6185310	0.02626	3437	2.64101e-09	Activated & secreting CD4 regulatory T cell %CD4+ T cell	prostate cancer	2.34355e-08	0.0116257	40.404
rs113435341	G	A	G	A	-2.11	-0.0424	0.0032	0.0194	1	198151688	0.0318	0.1815	140254	61106	outcome	1	198151688	0.2195	3437	1.30707e-21	Activated & secreting CD4 regulatory T cell %CD4+ T cell	prostate cancer	2.29554e-20	0.0284023	100.414
rs11579717	A	G	A	G	-1.573	0.011	0.0044	0.0434	1	199999121	0.0222	0.62	140254	61106	outcome	1	199999121	0.1855	3437	3.3512e-17	Activated & secreting CD4 regulatory T cell %CD4+ T cell	prostate cancer	1.32766e-16	0.0216783	76.115
rs12712610	G	A	G	A	-0.1572	-0.0188	0.2975	0.1786	2	38897249	0.0113	0.0953301	140254	61106	outcome	2	38897249	0.02752	3437	1.20601e-08	Activated & secreting CD4 regulatory T cell %CD4+ T cell	prostate cancer	7.58971e-08	0.0103292	35.8513
rs138915779	A	C	A	C	-1.565	0.0528	0.0035	0.0162	1	190079170	0.035	0.1315	140254	61106	outcome	1	190079170	0.2272	3437	6.75461e-12	Activated & secreting CD4 regulatory T cell %CD4+ T cell	prostate cancer	5.54113e-11	0.0170846	59.7055
rs138960714	C	A	C	A	-2.923	-0.0566	0.0006	0.0083	4	123422719	0.0513	0.2695	140254	61106	outcome	4	123422719	0.4989	3437	5.13098e-09	Activated & secreting CD4 regulatory T cell %CD4+ T cell	prostate cancer	2.0533e-08	0.0102466	35.5613
rs147838148	G	T	G	T	-2.662	-0.0601	0.0006	0.0093	22	47814108	0.0497	0.2266	140254	61106	outcome	22	47814108	0.4776	3437	2.68398e-08	Activated & secreting CD4 regulatory T cell %CD4+ T cell	prostate cancer	1.09215e-07	0.00849839	29.4422
rs61839660	T	C	T	C	0.4097	-0.0205	0.0543	0.0865	10	6094697	0.0143	0.1509	140254	61106	outcome	10	6094697	0.05516	3437	1.38007e-13	Activated & secreting CD4 regulatory T cell %CD4+ T cell	prostate cancer	1.28417e-12	0.0172391	60.2551
rs74830391	T	C	T	C	0.1992	-0.0263	0.1525	0.1053	7	37427289	0.0137	0.0541602	140254	61106	outcome	7	37427289	0.03616	3437	3.87097e-08	Activated & secreting CD4 regulatory T cell %CD4+ T cell	prostate cancer	2.79049e-07	0.0102569	35.5977
rs11579717	A	G	A	G	-1.078	0.011	0.0044	0.0434	1	199999121	0.0222	0.62	140254	61106	outcome	1	199999121	0.1911	3437	1.83202e-08	CD25++ CD45RA- CD4 not regulatory T cell %T cell	prostate cancer	4.08287e-08	0.0101813	35.3326
rs4497244	A	G	A	G	-1.396	-0.0173	0.0033	0.0176	1	197997953	0.031	0.576301	140254	61106	outcome	1	197997953	0.2116	3437	4.85736e-11	CD25++ CD45RA- CD4 not regulatory T cell %T cell	prostate cancer	1.38865e-10	0.0128197	44.6077
rs61839660	T	C	T	C	0.5758	-0.0205	0.0543	0.0865	10	6094697	0.0143	0.1509	140254	61106	outcome	10	6094697	0.05532	3437	5.32353e-25	CD25++ CD45RA- CD4 not regulatory T cell %T cell	prostate cancer	1.42009e-23	0.0340507	121.087
rs16988872	T	C	T	C	-0.2007	0.0124	0.2659	0.1639	19	51580161	0.0109	0.2542	140254	61106	outcome	19	51580161	0.03572	1856	2.20399e-08	Granulocytic Myeloid-Derived Suppressor Cells Absolute Count	prostate cancer	5.4852e-08	0.0157253	29.6205
rs3865444	A	C	A	C	-0.2687	0.0143	0.2128	0.3273	19	51727962	0.0086	0.0949992	140254	61106	outcome	19	51727962	0.03761	1856	1.28499e-12	Granulocytic Myeloid-Derived Suppressor Cells Absolute Count	prostate cancer	6.25614e-12	0.0241892	45.9585
rs146620586	T	G	T	G	-1.617	-0.0372	0.0032	0.0173	1	198524264	0.0373	0.3183	140254	61106	outcome	1	198524264	0.2699	3427	2.30202e-09	Effector Memory CD4+ T cell %CD4+ T cell	prostate cancer	8.70657e-09	0.0166805	58.0997
rs4959028	G	A	G	A	0.2111	-0.0024	0.2288	0.0632	6	32383138	0.0164	0.8828	140254	61106	outcome	6	32383138	0.03351	3427	3.34804e-10	Effector Memory CD4+ T cell %CD4+ T cell	prostate cancer	6.06859e-10	0.0157264	54.7235
rs4849134	G	A	G	A	0.1004	-0.0016	0.6455	0.7256	2	111615015	0.0089	0.8555	140254	61106	outcome	2	111615015	0.0178	3395	1.85601e-08	Naive CD8+ T cell Absolute Count	prostate cancer	3.08866e-08	0.00461328	15.7254
rs72851020	T	C	T	C	0.2077	-0.0186	0.7906	0.8465	6	32501393	0.0119	0.1172	140254	61106	outcome	6	32501393	0.03317	3395	4.32504e-10	Naive CD8+ T cell Absolute Count	prostate cancer	2.95e-09	0.0142836	49.1664
rs147174426	T	A	T	A	-0.4529	-0.0105	0.1717	0.0635	1	161528012	0.0183	0.5646	140254	61106	outcome	1	161528012	0.03177	3629	6.64049e-45	CD14- CD16+ monocyte %monocyte	prostate cancer	1.21047e-43	0.0583435	224.723
rs3826007	T	C	T	C	-0.1739	-0.0171	0.2136	0.2498	15	80263217	0.0095	0.0721905	140254	61106	outcome	15	80263217	0.02973	3629	5.41003e-09	CD14- CD16+ monocyte %monocyte	prostate cancer	4.2642e-08	0.0101595	37.2268
rs13210358	T	C	T	C	-0.3968	0.0125	0.0315	0.0167	6	102272234	0.0411	0.760599	140254	61106	outcome	6	102272234	0.07123	3668	2.72603e-08	CD4+ T cell %leukocyte	prostate cancer	5.26016e-08	0.00960691	35.5605
rs6755452	G	T	G	T	0.2296	-0.0043	0.1918	0.2475	2	87035076	0.0103	0.6736	140254	61106	outcome	2	87035076	0.03013	3668	3.24489e-14	CD4-CD8- T cell %leukocyte	prostate cancer	1.04337e-13	0.0163434	60.9102
rs79251210	A	G	A	G	0.3543	-0.0303	0.0378	0.0346	6	100468602	0.0231	0.19	140254	61106	outcome	6	100468602	0.06302	3668	2.02302e-08	CD4-CD8- T cell %leukocyte	prostate cancer	9.71599e-08	0.00913123	33.7836
rs9896155	G	A	G	A	0.1408	-0.0193	0.6738	0.4597	17	33794697	0.0085	0.02243	140254	61106	outcome	17	33794697	0.02517	3668	2.38798e-08	CD4-CD8- T cell %leukocyte	prostate cancer	2.58612e-07	0.00871466	32.2288
rs3087456	A	G	A	G	-0.4526	0.0012	0.7662	0.7348	16	10970902	0.0096	0.897	140254	61106	outcome	16	10970902	0.02659	3595	1.46893e-62	HLA DR+ CD8+ T cell %T cell	prostate cancer	1.19815e-61	0.0733915	284.582
rs542160	T	C	T	C	-0.1295	-0.0039	0.5089	0.5324	11	107676543	0.0083	0.637101	140254	61106	outcome	11	107676543	0.02364	3595	4.62402e-08	HLA DR+ CD8+ T cell %T cell	prostate cancer	1.00031e-07	0.00838247	30.3728
rs72779785	G	A	G	A	-0.1852	-0.0075	0.1634	0.0433	16	10569039	0.0252	0.766099	140254	61106	outcome	16	10569039	0.03176	3595	5.96403e-09	HLA DR+ CD8+ T cell %T cell	prostate cancer	1.19043e-08	0.00937739	34.0119
rs9378213	G	T	G	T	0.1984	0.0021	0.3057	0.4069	6	32448398	0.0082	0.7955	140254	61106	outcome	6	32448398	0.02991	3595	3.78704e-11	HLA DR+ CD8+ T cell %T cell	prostate cancer	8.29157e-11	0.0167092	61.0564
rs34613828	T	A	T	A	0.2127	-0.0031	0.1952	0.2409	2	87022759	0.0104	0.7614	140254	61106	outcome	2	87022759	0.03071	3652	5.12153e-12	CD4-CD8- Natural Killer T Absolute Count	prostate cancer	1.24912e-11	0.0142145	52.6312
rs11954223	A	G	A	G	2.135	-0.0038	0.001	0.0212	5	67413499	0.0307	0.9026	140254	61106	outcome	5	67413499	0.3629	3669	4.36204e-09	B cell %CD3- lymphocyte	prostate cancer	7.55465e-09	0.00910733	33.7035
rs9520836	G	A	G	A	0.1363	-0.0154	0.4999	0.2364	13	108957063	0.0103	0.1371	140254	61106	outcome	13	108957063	0.02361	3669	8.45006e-09	B cell %CD3- lymphocyte	prostate cancer	5.00945e-08	0.00928884	34.3816
rs9916257	T	G	T	G	0.1693	0.0065	0.5685	0.4305	17	33797371	0.0085	0.4467	140254	61106	outcome	17	33797371	0.0237	3669	1.08393e-12	B cell %CD3- lymphocyte	prostate cancer	4.75755e-12	0.0140623	52.3018
rs117147408	G	A	G	A	0.4819	0.0222	0.0273	0.0233	6	101980039	0.0304	0.465799	140254	61106	outcome	6	101980039	0.07946	3440	1.46599e-09	CD28- CD8dim T cell %T cell	prostate cancer	4.4303e-09	0.0123335	42.932
rs12986962	G	A	G	A	-0.1604	0.0024	0.2827	0.3681	2	111808558	0.0083	0.768599	140254	61106	outcome	2	111808558	0.02829	3440	1.54099e-08	CD28- CD8dim T cell %T cell	prostate cancer	2.89951e-08	0.0104343	36.2516
rs4796089	C	T	C	T	-0.2225	-0.0038	0.1343	0.089	17	33814758	0.0148	0.7971	140254	61106	outcome	17	33814758	0.0377	3440	3.91201e-09	CD28- CD8dim T cell %T cell	prostate cancer	7.44852e-09	0.0115115	40.0376
rs11896593	C	G	C	G	0.1051	-0.0177	0.3706	0.2014	2	38925155	0.0106	0.0930401	140254	61106	outcome	2	38925155	0.01838	3408	1.16799e-08	CD28+ CD45RA+ CD8+ T cell Absolute Count	prostate cancer	7.32166e-08	0.00515309	17.6423
rs12901644	T	C	T	C	-0.1685	-0.0122	0.0929	0.0905	15	36456429	0.0142	0.3899	140254	61106	outcome	15	36456429	0.03056	3408	3.80303e-08	CD28+ CD45RA+ CD8+ T cell Absolute Count	prostate cancer	1.11527e-07	0.00478521	16.3768
rs2066399	A	G	A	G	0.2255	-0.0099	0.821	0.8268	6	15880540	0.0108	0.3559	140254	61106	outcome	6	15880540	0.03219	3657	2.94781e-12	CD20 on IgD+ CD24- B cell	prostate cancer	1.44444e-11	0.0149458	55.4557
rs72836542	T	C	T	C	0.1645	0.0062	0.3161	0.2799	6	14091682	0.0089	0.4856	140254	61106	outcome	6	14091682	0.02685	3657	9.87006e-10	CD20 on IgD+ CD24- B cell	prostate cancer	3.10007e-09	0.0116998	43.2691
rs35567463	A	C	A	C	0.1709	-0.0317	0.3506	0.1706	6	32633970	0.0108	0.00321499	140254	61106	outcome	6	32633970	0.02875	3657	3.02399e-09	CD20 on IgD- CD24- B cell	prostate cancer	7.02742e-08	0.0132996	49.2652
rs10501383	T	C	T	C	-0.255	-0.0101	0.0971	0.0806	11	60164527	0.0149	0.4972	140254	61106	outcome	11	60164527	0.04098	3657	5.40605e-10	CD20 on IgD- CD38- B cell	prostate cancer	1.708e-09	0.0114017	42.1538
rs11751198	A	G	A	G	0.1995	-0.036	0.1839	0.0422	6	31753526	0.0203	0.0761097	140254	61106	outcome	6	31753526	0.03634	3657	4.31797e-08	CD20 on IgD- CD38- B cell	prostate cancer	2.914e-07	0.0119465	44.1924
rs55809481	C	T	C	T	-0.2424	0.0058	0.2425	0.2478	19	49872521	0.0093	0.5316	140254	61106	outcome	19	49872521	0.02879	3657	5.43751e-17	CD20 on IgD- CD38- B cell	prostate cancer	2.7262e-16	0.0215869	80.6408
rs61731791	T	C	T	C	0.2328	-0.0257	0.0972	0.0386	19	50940778	0.0216	0.2344	140254	61106	outcome	19	50940778	0.04226	3657	3.857e-08	CD20 on IgD- CD38- B cell	prostate cancer	1.60113e-07	0.0095116	35.0988
rs1941018	G	A	G	A	-0.1965	0.0063	0.6081	0.5386	11	60268994	0.0082	0.4436	140254	61106	outcome	11	60268994	0.02481	3657	3.155e-15	CD20 on naive-mature B cell	prostate cancer	1.67618e-14	0.0184037	68.5267
rs388354	C	A	C	A	-0.1343	0.005	0.5205	0.5995	7	40190449	0.0086	0.562	140254	61106	outcome	7	40190449	0.0244	3657	3.93396e-08	CD20 on naive-mature B cell	prostate cancer	9.66539e-08	0.00900309	33.2052
rs6910382	G	C	G	C	0.2234	-0.0029	0.8198	0.8267	6	15914349	0.0106	0.7871	140254	61106	outcome	6	15914349	0.0318	3657	2.52581e-12	CD20 on naive-mature B cell	prostate cancer	6.18432e-12	0.0147455	54.7013
rs72836542	T	C	T	C	0.1572	0.0062	0.3161	0.2799	6	14091682	0.0089	0.4856	140254	61106	outcome	6	14091682	0.02688	3657	5.42001e-09	CD20 on naive-mature B cell	prostate cancer	1.57921e-08	0.0106845	39.4734
rs3793662	T	C	T	C	-0.1813	0.0016	0.7758	0.8052	9	95886051	0.0102	0.8731	140254	61106	outcome	9	95886051	0.02898	3656	4.37895e-10	CD25 on IgD+ CD38+ B cell	prostate cancer	8.28781e-10	0.0114343	42.2643
rs62626323	A	C	A	C	0.349	-0.0034	0.1074	0.0494	10	6115678	0.0184	0.8539	140254	61106	outcome	10	6115678	0.03994	3656	3.53671e-18	CD25 on IgD+ CD38+ B cell	prostate cancer	1.07045e-17	0.023353	87.3721
rs709589	T	C	T	C	-0.2486	0.0005	0.4557	0.4292	14	106306841	0.0123	0.9698	140254	61106	outcome	14	106306841	0.03091	3656	1.18987e-15	CD25 on IgD+ CD38+ B cell	prostate cancer	2.59121e-15	0.0306584	115.569
rs3793662	T	C	T	C	-0.1698	0.0016	0.7759	0.8052	9	95886051	0.0102	0.8731	140254	61106	outcome	9	95886051	0.02871	3657	3.69199e-09	CD25 on IgD- CD38dim B cell	prostate cancer	6.48754e-09	0.0100266	37.0183
rs41294937	C	T	C	T	0.5734	-0.0055	0.1075	0.0487	10	6106621	0.0185	0.767201	140254	61106	outcome	10	6106621	0.03893	3657	9.24272e-48	CD25 on IgD- CD38dim B cell	prostate cancer	1.04524e-46	0.0630902	246.123
rs7920946	C	T	C	T	0.2333	0.0087	0.2773	0.2993	10	6074634	0.0087	0.3202	140254	61106	outcome	10	6074634	0.02716	3657	1.26096e-17	CD25 on IgD- CD38dim B cell	prostate cancer	1.12015e-16	0.0218156	81.5143
rs41294937	C	T	C	T	0.5555	-0.0055	0.1075	0.0487	10	6106621	0.0185	0.767201	140254	61106	outcome	10	6106621	0.03963	3657	1.57109e-43	CD25 on switched memory B cell	prostate cancer	1.58257e-42	0.0592127	230.044
rs4747882	T	A	T	A	-0.2315	0.0175	0.7132	0.7695	10	6162476	0.0095	0.0656901	140254	61106	outcome	10	6162476	0.02714	3657	2.14487e-17	CD25 on switched memory B cell	prostate cancer	5.5649e-16	0.0219241	81.9289
rs7072398	A	G	A	G	-0.2349	0.0018	0.6142	0.4654	10	6079846	0.0079	0.8251	140254	61106	outcome	10	6079846	0.02543	3657	4.24717e-20	CD25 on switched memory B cell	prostate cancer	1.47716e-19	0.0261498	98.1439
rs147487472	A	C	A	C	0.3795	0.0233	0.0416	0.0595	10	6191376	0.0179	0.1922	140254	61106	outcome	10	6191376	0.0615	3658	7.54797e-10	CD25 on IgD+ B cell	prostate cancer	4.27821e-09	0.011484	42.4733
rs41294937	C	T	C	T	0.476	-0.0055	0.1076	0.0487	10	6106621	0.0185	0.767201	140254	61106	outcome	10	6106621	0.04039	3658	1.739e-31	CD25 on IgD+ B cell	prostate cancer	1.1336e-30	0.0435127	166.319
rs17664049	T	C	T	C	-0.6608	0.023	0.013	0.0186	18	48685445	0.0344	0.5037	140254	61106	outcome	18	48685445	0.12	2912	3.96296e-08	CD3 on Effector Memory CD8+ T cell	prostate cancer	9.05332e-08	0.0112055	32.9775
rs2480679	G	A	G	A	0.2289	-0.0021	0.8652	0.89	1	167407517	0.0131	0.8743	140254	61106	outcome	1	167407517	0.04072	2912	2.07501e-08	CD3 on Effector Memory CD8+ T cell	prostate cancer	3.20076e-08	0.0122216	36.0049
rs2988279	A	G	A	G	0.3371	0.0123	0.4845	0.3928	1	167419839	0.0084	0.1434	140254	61106	outcome	1	167419839	0.02703	2912	8.19785e-35	CD3 on Effector Memory CD8+ T cell	prostate cancer	2.60244e-33	0.0567636	175.123
rs2949669	T	C	T	C	0.2073	0.0106	0.472	0.374	1	167417884	0.0085	0.213	140254	61106	outcome	1	167417884	0.02706	2911	2.48886e-14	CD3 on Terminally Differentiated CD8+ T cell	prostate cancer	1.60387e-13	0.0214193	63.6725
rs4689428	G	C	G	C	-0.1861	0.0035	0.2056	0.3151	4	6388191	0.0092	0.7072	140254	61106	outcome	4	6388191	0.03369	2911	3.63597e-08	CD3 on Terminally Differentiated CD8+ T cell	prostate cancer	6.55975e-08	0.0113132	33.2866
rs1723018	G	A	G	A	0.2737	0.0105	0.4559	0.378	1	167433420	0.0083	0.206	140254	61106	outcome	1	167433420	0.02723	2903	2.21208e-23	CD3 on Terminally Differentiated CD4+ T cell	prostate cancer	2.72115e-22	0.0371645	111.976
rs1773542	C	T	C	T	0.2805	0.0107	0.4552	0.3772	1	167432949	0.0083	0.1995	140254	61106	outcome	1	167432949	0.0264	3060	6.51929e-26	CD3 on HLA DR+ CD8+ T cell	prostate cancer	1.09561e-24	0.0390243	124.182
rs1886730	C	T	C	T	0.2857	0.015	0.5778	0.4875	1	2488608	0.0085	0.0779202	140254	61106	outcome	1	2488608	0.03952	1247	8.55264e-13	HVEM on Effector Memory CD8+ T cell	prostate cancer	2.95942e-12	0.0398241	51.6375
rs116423144	A	G	A	G	0.8507	0.0443	0.0077	0.0268	5	174310054	0.0307	0.1486	140254	61106	outcome	5	174310054	0.1494	2920	1.37401e-08	CD127 on CD28+ CD45RA- CD8+ T cell	prostate cancer	6.0107e-08	0.011059	32.6311
rs77789294	C	T	C	T	0.2186	0.008	0.0957	0.0426	14	29178686	0.023	0.726999	140254	61106	outcome	14	29178686	0.03992	3113	4.70804e-08	FSC-A on CD8+ T cell	prostate cancer	8.53356e-08	0.00827094	25.9455
rs11087000	C	A	C	A	0.1833	0.0123	0.339	0.4021	20	44809374	0.0085	0.1487	140254	61106	outcome	20	44809374	0.02617	3618	2.9181e-12	CD40 on CD14+ CD16+ monocyte	prostate cancer	2.56212e-11	0.0150576	55.2807
rs1801274	G	A	G	A	0.4646	-0.0078	0.3267	0.5082	1	161479745	0.0082	0.3417	140254	61106	outcome	1	161479745	0.02562	3618	2.0611e-70	CD40 on CD14+ CD16+ monocyte	prostate cancer	1.68046e-68	0.0949612	379.409
rs2664523	A	G	A	G	0.3595	-0.0264	0.0427	0.0858	20	45318042	0.0158	0.0953411	140254	61106	outcome	20	45318042	0.06265	3618	1.034e-08	CD40 on CD14+ CD16+ monocyte	prostate cancer	6.98843e-08	0.0105658	38.614
rs6687275	G	T	G	T	0.1985	-0.022	0.2729	0.1708	1	161515638	0.0118	0.0628898	140254	61106	outcome	1	161515638	0.02838	3618	3.16811e-12	CD40 on CD14+ CD16+ monocyte	prostate cancer	4.28248e-11	0.0156368	57.441
rs745307	A	G	A	G	0.6978	-0.0015	0.1461	0.2562	20	44747086	0.0093	0.8745	140254	61106	outcome	20	44747086	0.03329	3618	3.77572e-92	CD40 on CD14+ CD16+ monocyte	prostate cancer	2.36147e-91	0.121492	500.071
rs1800973	A	C	A	C	-0.315	-0.0181	0.0798	0.0717	12	69744014	0.0175	0.2999	140254	61106	outcome	12	69744014	0.04587	3629	7.73749e-12	HLA DR on CD14+ monocyte	prostate cancer	4.10014e-11	0.0145726	53.6363
rs80032720	A	G	A	G	0.4142	-0.1133	0.0733	0.0185	6	32384933	0.0312	0.000287799	140254	61106	outcome	6	32384933	0.05456	3629	3.97466e-14	HLA DR on CD14+ monocyte	prostate cancer	5.2685e-12	0.0233074	86.5532
rs9270585	T	C	T	C	-0.5871	-0.0285	0.5834	0.5544	6	32561300	0.008	0.000373199	140254	61106	outcome	6	32561300	0.02804	3629	5.5616e-92	HLA DR on CD14+ monocyte	prostate cancer	1.8128e-86	0.167548	730.009
rs1801274	G	A	G	A	-0.4504	-0.0078	0.3262	0.5082	1	161479745	0.0082	0.3417	140254	61106	outcome	1	161479745	0.02605	3590	2.09604e-64	CX3CR1 on CD14+ CD16- monocyte	prostate cancer	1.50576e-62	0.0891747	351.285
rs72865957	A	G	A	G	0.2834	0.0113	0.2681	0.3336	3	39355919	0.0086	0.1875	140254	61106	outcome	3	39355919	0.02853	3590	6.00206e-23	CX3CR1 on CD14+ CD16- monocyte	prostate cancer	1.22992e-21	0.0315194	116.772
rs9823718	G	C	G	C	-0.4122	-0.0036	0.1319	0.0808	3	39293757	0.0156	0.8154	140254	61106	outcome	3	39293757	0.03658	3590	5.78362e-29	CX3CR1 on CD14+ CD16- monocyte	prostate cancer	2.91229e-28	0.0389099	145.261
rs35626322	T	A	T	A	-0.4834	-0.0056	0.1943	0.247	2	87030421	0.0103	0.584901	140254	61106	outcome	2	87030421	0.03327	2910	3.18127e-46	CD8 on naive CD8+ T cell	prostate cancer	2.38284e-45	0.0731627	229.552
rs4081559	T	C	T	C	0.2396	-0.0352	0.4302	0.1265	6	31323677	0.0121	0.00347096	140254	61106	outcome	6	31323677	0.03063	2910	7.29625e-15	CD8 on naive CD8+ T cell	prostate cancer	2.88192e-13	0.0281447	84.215
rs9468618	T	C	T	C	-0.2215	0.0237	0.182	0.0825	6	29750776	0.0143	0.0966897	140254	61106	outcome	6	29750776	0.03934	2910	1.98701e-08	CD8 on naive CD8+ T cell	prostate cancer	1.00543e-07	0.0146084	43.111
rs191753228	T	C	T	C	1.583	-0.0156	0.0043	0.0234	1	196321168	0.0285	0.584501	140254	61106	outcome	1	196321168	0.2431	2650	8.93305e-11	CD45RA on CD39+ resting CD4 regulatory T cell	prostate cancer	2.03966e-10	0.021458	58.0667
rs142186496	G	A	G	A	0.4579	0.0377	0.0688	0.0073	6	31473707	0.0468	0.4209	140254	61106	outcome	6	31473707	0.07698	1578	3.34403e-09	HLA DR on CD33+ HLA DR+ CD14dim	prostate cancer	6.37903e-09	0.026866	43.5097
rs613165	A	G	A	G	-0.2784	-0.0198	0.3188	0.1716	6	31834398	0.0106	0.0616595	140254	61106	outcome	6	31834398	0.04395	1578	3.095e-10	HLA DR on CD33+ HLA DR+ CD14dim	prostate cancer	1.2481e-09	0.0336637	54.9021
rs9270588	T	C	T	C	-0.4302	-0.0287	0.5722	0.5546	6	32561327	0.008	0.000343099	140254	61106	outcome	6	32561327	0.04022	1578	7.98362e-26	HLA DR on CD33+ HLA DR+ CD14dim	prostate cancer	4.04287e-24	0.0906065	157.023
rs111983490	A	G	A	G	-0.3007	-0.0194	0.2111	0.0506	6	32205324	0.0183	0.2898	140254	61106	outcome	6	32205324	0.03814	3060	4.36315e-15	HLA DR on B cell	prostate cancer	2.59078e-14	0.0301167	94.9566
rs143305120	C	T	C	T	-0.3957	-0.0139	0.0359	0.0237	6	13991643	0.0285	0.6265	140254	61106	outcome	6	13991643	0.07188	3060	4.00904e-08	HLA DR on B cell	prostate cancer	8.09945e-08	0.0108387	33.508
rs147210938	A	G	A	G	-0.4296	0.0254	0.0332	0.0133	6	13892767	0.0416	0.5404	140254	61106	outcome	6	13892767	0.07489	3060	1.06299e-08	HLA DR on B cell	prostate cancer	2.48002e-08	0.0118477	36.6646
rs2286975	A	G	A	G	0.1738	-0.0052	0.3234	0.2738	16	11114006	0.0093	0.578	140254	61106	outcome	16	11114006	0.02982	3060	6.17903e-09	HLA DR on B cell	prostate cancer	1.40665e-08	0.0132191	40.9655
rs3869145	A	G	A	G	-0.3894	-0.0576	0.0817	0.0397	6	31851354	0.0209	0.00587503	140254	61106	outcome	6	31851354	0.0561	3060	4.73151e-12	HLA DR on B cell	prostate cancer	1.15446e-10	0.0227525	71.197
rs7192768	C	T	C	T	-0.4789	0.0075	0.8124	0.7587	16	11004905	0.0107	0.4855	140254	61106	outcome	16	11004905	0.03416	3060	2.47002e-43	HLA DR on B cell	prostate cancer	3.04795e-42	0.0699073	229.844
rs74405933	A	G	A	G	-0.7731	0.0063	0.0729	0.0514	6	14095755	0.0181	0.728201	140254	61106	outcome	6	14095755	0.05178	3060	1.0639e-48	HLA DR on B cell	prostate cancer	6.43752e-48	0.0807896	268.768
rs9270599	A	G	A	G	0.5573	0.0216	0.635	0.5848	6	32561656	0.0081	0.00783303	140254	61106	outcome	6	32561656	0.03189	3060	3.05492e-65	HLA DR on B cell	prostate cancer	4.95203e-62	0.143971	514.308
rs77762131	C	G	C	G	0.3229	-0.0699	0.045	0.02	14	96205838	0.0334	0.0364099	140254	61106	outcome	14	0.05806	3656	2.85299e-08	96205838	IgD+ CD38- B cell Absolute Count	prostate cancer	2.62521e-07	0.00896153	33.0415
rs75766272	T	C	T	C	0.483	-0.0145	0.0201	0.0302	1	8009985	0.0273	0.596	140254	61106	outcome	1	0.08768	3657	3.86002e-08	8009985	IgD+ CD24- B cell %B cell	prostate cancer	9.02148e-08	0.00918972	33.8999
rs12874404	G	A	G	A	0.1691	-0.0188	0.3256	0.0595	13	108993494	0.0193	0.3308	140254	61106	outcome	13	0.02653	3656	2.04202e-10	108993494	CD24+ CD27+ B cell Absolute Count	prostate cancer	9.07776e-10	0.012558	46.4704
rs11687597	G	A	G	A	0.1644	0.019	0.2069	0.2224	2	136926146	0.0097	0.0502805	140254	61106	outcome	2	0.03007	3656	4.86004e-08	136926146	IgD- CD38dim B cell %lymphocyte	prostate cancer	3.82928e-07	0.00886997	32.7009
rs7840395	G	A	G	A	-0.1408	-0.0045	0.5715	0.4754	8	144984956	0.0085	0.5997	140254	61106	outcome	8	0.02438	3656	8.25296e-09	144984956	IgD- CD38dim B cell %lymphocyte	prostate cancer	2.0505e-08	0.00970962	35.8268
rs11249570	A	G	A	G	-0.1525	-0.0096	0.4581	0.3979	5	177033794	0.0086	0.2663	140254	61106	outcome	5	0.02632	3019	7.66302e-09	177033794	CD62L- monocyte Absolute Count	prostate cancer	2.70902e-08	0.0115465	35.2426
rs4987369	T	G	T	G	0.2378	0.0045	0.2774	0.3091	1	169662742	0.0087	0.6035	140254	61106	outcome	1	0.03006	3019	3.6116e-15	169662742	CD62L- monocyte Absolute Count	prostate cancer	1.12749e-14	0.0226703	69.983
rs10786199	A	G	A	G	-0.1827	-0.0019	0.2888	0.4001	10	97069472	0.0083	0.8149	140254	61106	outcome	10	0.02838	3437	1.38998e-10	97069472	CD39+ secreting CD4 regulatory T cell %CD4 regulatory T cell	prostate cancer	2.7687e-10	0.0137118	47.755
rs10882701	C	A	C	A	-0.3962	-0.0017	0.5141	0.5719	10	97741071	0.009	0.8465	140254	61106	outcome	10	0.02472	3437	8.02786e-56	97741071	CD39+ secreting CD4 regulatory T cell %CD4 regulatory T cell	prostate cancer	5.99923e-55	0.0784248	292.314
rs12268044	T	C	T	C	-0.1937	0.0098	0.3439	0.3899	10	98794615	0.0089	0.2683	140254	61106	outcome	10	0.02673	3437	5.32231e-13	98794615	CD39+ secreting CD4 regulatory T cell %CD4 regulatory T cell	prostate cancer	3.16856e-12	0.0169313	59.1608
rs147121076	G	T	G	T	0.4681	-0.0296	0.0262	0.0157	10	95924521	0.0352	0.3994	140254	61106	outcome	10	0.0813	3437	9.29009e-09	95924521	CD39+ secreting CD4 regulatory T cell %CD4 regulatory T cell	prostate cancer	2.88078e-08	0.0111809	38.8408
rs2275759	C	A	C	A	1.015	0.0046	0.4692	0.5418	10	97624709	0.0081	0.5677	140254	61106	outcome	10	0.01889	3437	1e-200	97624709	CD39+ secreting CD4 regulatory T cell %CD4 regulatory T cell	prostate cancer	0	0.513158	3620.68
rs72809762	T	C	T	C	0.4759	0.0026	0.0675	0.0354	10	97294154	0.0221	0.905	140254	61106	outcome	10	0.0499	3437	2.69526e-21	97294154	CD39+ secreting CD4 regulatory T cell %CD4 regulatory T cell	prostate cancer	7.84112e-21	0.0285111	100.81
rs7918541	G	A	G	A	-0.5171	-0.005	0.9472	0.9857	10	98168559	0.0386	0.8973	140254	61106	outcome	10	0.0553	3437	1.52616e-20	98168559	CD39+ secreting CD4 regulatory T cell %CD4 regulatory T cell	prostate cancer	4.38023e-20	0.0267457	94.3963
rs113435341	G	A	G	A	-1.681	-0.0424	0.0032	0.0194	1	198151688	0.0318	0.1815	140254	61106	outcome	1	0.2295	3405	3.0311e-13	198151688	CD25++ CD45RA- CD4 not regulatory T cell Absolute Count	prostate cancer	2.34534e-12	0.018027	62.4721
rs61839660	T	C	T	C	0.5547	-0.0205	0.0542	0.0865	10	6094697	0.0143	0.1509	140254	61106	outcome	10	0.05665	3405	2.40326e-22	6094697	CD25++ CD45RA- CD4 not regulatory T cell Absolute Count	prostate cancer	5.04826e-21	0.031546	110.848
rs2455069	G	A	G	A	0.2522	-0.0138	0.5197	0.416	19	51728641	0.0082	0.0912704	140254	61106	outcome	19	0.03266	1857	1.8608e-14	51728641	Immature Myeloid-Derived Suppressor Cells %CD33dim HLA DR- CD66b-	prostate cancer	1.03274e-13	0.0317531	60.8336
rs72923436	A	C	A	C	-0.5379	-0.0074	0.0307	0.0657	2	176970247	0.0161	0.6489	140254	61106	outcome	2	0.09656	1857	2.91897e-08	176970247	Immature Myeloid-Derived Suppressor Cells %CD33dim HLA DR- CD66b-	prostate cancer	4.63249e-08	0.0172199	32.5025
rs1064086	A	G	A	G	-0.1062	0.0033	0.328	0.3858	2	237034061	0.0096	0.7348	140254	61106	outcome	2	0.01937	3427	4.56405e-08	237034061	Naive CD8+ T cell %CD8+ T cell	prostate cancer	8.54467e-08	0.0049719	17.1138
rs146620586	T	G	T	G	1.574	-0.0372	0.0032	0.0173	1	198524264	0.0373	0.3183	140254	61106	outcome	1	0.2873	3427	4.57404e-08	198524264	Terminally Differentiated CD8+ T cell %T cell	prostate cancer	1.51857e-07	0.0158051	55.0018
rs6707421	G	A	G	A	0.1972	-0.0165	0.3011	0.1677	2	38897781	0.0115	0.1514	140254	61106	outcome	2	0.02757	3427	1.02707e-12	38897781	Terminally Differentiated CD8+ T cell %T cell	prostate cancer	8.67331e-12	0.016367	56.9898
rs113016235	G	T	G	T	-0.2092	-0.0161	0.1994	0.1273	6	32584977	0.0121	0.1821	140254	61106	outcome	6	0.03717	3427	1.97301e-08	32584977	Terminally Differentiated CD4-CD8- T cell %T cell	prostate cancer	8.99327e-08	0.0139731	48.5362
rs113435341	G	A	G	A	1.335	-0.0424	0.0032	0.0194	1	198151688	0.0318	0.1815	140254	61106	outcome	1	0.2281	3427	5.36303e-09	198151688	Terminally Differentiated CD4-CD8- T cell %T cell	prostate cancer	2.60256e-08	0.0113697	39.3892
rs6755452	G	T	G	T	0.1903	-0.0043	0.1886	0.2475	2	87035076	0.0103	0.6736	140254	61106	outcome	2	0.03241	3427	4.74602e-09	87035076	Terminally Differentiated CD4-CD8- T cell %T cell	prostate cancer	1.02659e-08	0.0110837	38.3871
rs73402222	C	T	C	T	-0.1934	0.0036	0.3458	0.0634	6	31388449	0.0162	0.8231	140254	61106	outcome	6	0.03245	3668	2.756e-09	31388449	CD8+ T cell %T cell	prostate cancer	5.2883e-09	0.016923	63.1079
rs79086781	T	C	T	C	0.471	-0.0238	0.0378	0.0367	6	100526652	0.0219	0.2773	140254	61106	outcome	6	0.06515	3668	5.86138e-13	100526652	CD8dim T cell %leukocyte	prostate cancer	3.76919e-12	0.0161372	60.1294
rs2181036	C	T	C	T	-0.1446	-0.0056	0.4167	0.4501	9	117649136	0.0082	0.4912	140254	61106	outcome	9	0.02608	3579	3.16599e-08	117649136	HLA DR+ CD8+ T cell Absolute Count	prostate cancer	8.37498e-08	0.0101644	36.7314
rs3087456	A	G	A	G	-0.4286	0.0012	0.766	0.7348	16	10970902	0.0096	0.897	140254	61106	outcome	16	0.0278	3579	5.57057e-52	10970902	HLA DR+ CD8+ T cell Absolute Count	prostate cancer	4.08749e-51	0.0658535	252.164
rs72779785	G	A	G	A	-0.2122	-0.0075	0.1636	0.0433	16	10569039	0.0252	0.766099	140254	61106	outcome	16	0.03296	3579	1.358e-10	10569039	HLA DR+ CD8+ T cell Absolute Count	prostate cancer	3.02413e-10	0.012323	44.6295
rs9378213	G	T	G	T	0.2434	0.0021	0.3061	0.4069	6	32448398	0.0082	0.7955	140254	61106	outcome	6	0.03098	3579	5.15941e-15	32448398	HLA DR+ CD8+ T cell Absolute Count	prostate cancer	1.41726e-14	0.025167	92.3464
rs115536607	T	C	T	C	0.3694	0.0275	0.0545	0.0411	6	101417409	0.02	0.1682	140254	61106	outcome	6	0.05436	3668	1.25314e-11	101417409	CD4-CD8- Natural Killer T %T cell	prostate cancer	9.54342e-11	0.0140631	52.2908
rs117147408	G	A	G	A	0.7037	0.0222	0.0275	0.0233	6	101980039	0.0304	0.465799	140254	61106	outcome	6	0.07581	3668	2.75486e-20	101980039	CD4-CD8- Natural Killer T %T cell	prostate cancer	2.05759e-19	0.0264867	99.742
rs34613828	T	A	T	A	0.2238	-0.0031	0.1945	0.2409	2	87022759	0.0104	0.7614	140254	61106	outcome	2	0.03107	3668	7.12033e-13	87022759	CD4-CD8- Natural Killer T %T cell	prostate cancer	1.84693e-12	0.0156941	58.4518
rs77738700	A	G	A	G	-0.3832	-0.0034	0.1067	0.0318	11	112751407	0.0261	0.8964	140254	61106	outcome	11	0.0392	3668	2.67979e-22	112751407	CD4-CD8- Natural Killer T %T cell	prostate cancer	9.09517e-22	0.0279926	105.576
rs79251210	A	G	A	G	0.564	-0.0303	0.0378	0.0346	6	100468602	0.0231	0.19	140254	61106	outcome	6	0.06488	3668	5.29054e-18	100468602	CD4-CD8- Natural Killer T %T cell	prostate cancer	7.31244e-17	0.023139	86.8371
rs9488834	A	G	A	G	0.3806	-0.0002	0.0465	0.0192	6	97889936	0.031	0.9954	140254	61106	outcome	6	0.05843	3668	8.37529e-11	97889936	CD4-CD8- Natural Killer T %T cell	prostate cancer	1.39849e-10	0.0128452	47.7033
rs112637846	A	C	A	C	3.334	0.0319	0.0003	0.0282	6	149114553	0.0262	0.2225	140254	61106	outcome	6	0.5986	3408	2.75797e-08	149114553	CD28+ CD45RA+ CD8dim T cell Absolute Count	prostate cancer	1.11638e-07	0.00666733	22.8614
rs11579717	A	G	A	G	1.176	0.011	0.0044	0.0434	1	199999121	0.0222	0.62	140254	61106	outcome	1	0.1662	3408	1.76889e-12	199999121	CD28+ CD45RA+ CD8dim T cell Absolute Count	prostate cancer	5.30644e-12	0.0121166	41.7755
rs116794175	C	T	C	T	1.018	-0.0242	0.0043	0.0063	1	194010208	0.0618	0.696	140254	61106	outcome	1	0.1715	3408	3.23303e-09	194010208	CD28+ CD45RA+ CD8dim T cell Absolute Count	prostate cancer	6.87789e-09	0.00887406	30.4957
rs12314907	G	A	G	A	8.184	-0.0441		0.0246	12	79661771	0.035	0.2077	140254	61106	outcome	12	1.461	3408	2.27101e-08	79661771	CD28+ CD45RA+ CD8dim T cell Absolute Count	prostate cancer	9.73512e-08
rs12712610	G	A	G	A	0.1631	-0.0188	0.2974	0.1786	2	38897249	0.0113	0.0953301	140254	61106	outcome	2	0.02442	3408	2.82293e-11	38897249	CD28+ CD45RA+ CD8dim T cell Absolute Count	prostate cancer	2.48523e-10	0.011117	38.2901
rs146620586	T	G	T	G	2.334	-0.0372	0.0032	0.0173	1	198524264	0.0373	0.3183	140254	61106	outcome	1	0.2506	3408	2.12324e-20	198524264	CD28+ CD45RA+ CD8dim T cell Absolute Count	prostate cancer	2.07758e-19	0.0347528	122.63
rs61038907	A	C	A	C	0.1398	-0.0024	0.2664	0.3795	2	87061070	0.0094	0.7991	140254	61106	outcome	2	0.02509	3408	2.72101e-08	87061070	CD28+ CD45RA+ CD8dim T cell Absolute Count	prostate cancer	4.84067e-08	0.00763902	26.2188
rs74577787	T	C	T	C	3.341	0.0404	0.0003	0.0123	3	84799491	0.0374	0.2795	140254	61106	outcome	3	0.5986	3408	2.58399e-08	84799491	CD28+ CD45RA+ CD8dim T cell Absolute Count	prostate cancer	9.32913e-08	0.00669536	22.9581
rs17203563	A	G	A	G	0.1789	0.0041	0.2767	0.4343	6	32446459	0.008	0.6072	140254	61106	outcome	6	0.03263	3130	4.51804e-08	32446459	CD28- CD127- CD25++ CD8+ T cell Absolute Count	prostate cancer	9.43051e-08	0.0128109	40.5924
rs17583875	A	G	A	G	0.9979	-0.0122	0.0029	0.0252	1	197924770	0.0286	0.6697	140254	61106	outcome	1	0.1731	3440	8.81901e-09	197924770	CD28+ CD45RA+ CD8+ T cell %CD8+ T cell	prostate cancer	1.91429e-08	0.00575892	19.9138
rs199797711	C	T	C	T	37.99	-0.0296	0.001	0.0344	4	120352238	0.0281	0.2914	140254	61106	outcome	4	6.487	3425	5.19601e-09	120352238	CD45RA+ CD28- CD8+ T cell %CD8+ T cell	prostate cancer	1.98695e-08	2.88359	-5240.27
rs7559619	G	A	G	A	-2.745	0.0146	0.3508	0.3814	2	38892207	0.0088	0.0993299	140254	61106	outcome	2	0.372	3425	1.962e-13	38892207	CD45RA+ CD28- CD8+ T cell %CD8+ T cell	prostate cancer	2.31062e-12	3.43204	-4830.46
rs10176830	C	G	C	G	29.23	-0.0475	0.0003	0.0241	2	83631928	0.03	0.1131	140254	61106	outcome	2	4.452	3425	5.9731e-11	83631928	CD45RA+ CD28- CD8+ T cell %T cell	prostate cancer	4.72162e-10	0.512482	3598.28
rs10505739	C	A	C	A	18.81	-0.0284	0.0004	0.0321	12	10043518	0.0315	0.3666	140254	61106	outcome	12	3.393	3425	3.20597e-08	10043518	CD45RA+ CD28- CD8+ T cell %T cell	prostate cancer	9.86226e-08	0.28294	1350.66
rs10824158	T	G	T	G	9.768	-0.0227	0.0019	0.0448	10	53915868	0.022	0.302	140254	61106	outcome	10	1.725	3425	1.62401e-08	53915868	CD45RA+ CD28- CD8+ T cell %T cell	prostate cancer	5.76272e-08	0.361884	1941.23
rs111747460	A	G	A	G	26.82	0.0053	0.0003	0.0104	3	74016318	0.0401	0.8953	140254	61106	outcome	3	4.296	3425	4.80596e-10	74016318	CD45RA+ CD28- CD8+ T cell %T cell	prostate cancer	8.50106e-10	0.431458	2597.66
rs114230155	A	G	A	G	9.265	0.0306	0.0023	0.0121	1	102796337	0.0392	0.4348	140254	61106	outcome	1	1.585	3425	5.46802e-09	102796337	CD45RA+ CD28- CD8+ T cell %T cell	prostate cancer	1.65649e-08	0.393957	2225.11
rs114421150	A	C	A	C	25	0.0994	0.0003	0.0072	4	16986930	0.0526	0.0585194	140254	61106	outcome	4	4.08	3425	9.99793e-10	16986930	CD45RA+ CD28- CD8+ T cell %T cell	prostate cancer	8.89789e-09	0.374887	2052.81
rs114581990	G	A	G	A	8.874	-0.0248	0.0022	0.0091	2	235962017	0.0531	0.640301	140254	61106	outcome	2	1.564	3425	1.513e-08	235962017	CD45RA+ CD28- CD8+ T cell %T cell	prostate cancer	3.30824e-08	0.345728	1808.77
rs116399750	A	G	A	G	17.96	0.0709	0.0006	0.0153	4	176754667	0.0373	0.0574302	140254	61106	outcome	4	3.205	3425	2.27101e-08	176754667	CD45RA+ CD28- CD8+ T cell %T cell	prostate cancer	1.65864e-07	0.386842	2159.57
rs116581718	C	T	C	T	22.4	-0.0104	0.0006	0.0186	5	29413612	0.0316	0.741	140254	61106	outcome	5	3.301	3425	1.35207e-11	29413612	CD45RA+ CD28- CD8+ T cell %T cell	prostate cancer	3.18373e-11	0.601751	5172.12
rs116915023	T	C	T	C	10.65	0.0029	0.0016	0.0153	18	62442252	0.0392	0.9419	140254	61106	outcome	18	1.782	3425	2.49701e-09	62442252	CD45RA+ CD28- CD8+ T cell %T cell	prostate cancer	4.04533e-09	0.362371	1945.33
rs116916598	G	A	G	A	19.07	0.025	0.0006	0.0153	11	121746998	0.0445	0.574601	140254	61106	outcome	11	3.407	3425	2.33297e-08	121746998	CD45RA+ CD28- CD8+ T cell %T cell	prostate cancer	5.50029e-08	0.436136	2647.61
rs117173207	A	G	A	G	18.77	-0.0354	0.0004	0.0156	11	24544063	0.0362	0.3284	140254	61106	outcome	11	3.342	3425	2.10199e-08	24544063	CD45RA+ CD28- CD8+ T cell %T cell	prostate cancer	7.08933e-08	0.281738	1342.67
rs117284243	T	A	T	A	49.65	-0.0816	0.0001	0.0086	11	122918979	0.0487	0.0940503	140254	61106	outcome	11	5.795	3425	1.5729e-17	122918979	CD45RA+ CD28- CD8+ T cell %T cell	prostate cancer	2.95145e-16	0.492975	3328.15
rs117478414	T	C	T	C	32.87	0.0033	0.0001	0.0133	8	56081028	0.04	0.935	140254	61106	outcome	8	5.796	3425	1.532e-08	56081028	CD45RA+ CD28- CD8+ T cell %T cell	prostate cancer	2.39249e-08	0.216066	943.438
rs117692894	T	G	T	G	33.95	0.0032	0.0001	0.0238	7	39587008	0.0301	0.9146	140254	61106	outcome	7	5.804	3425	5.40804e-09	39587008	CD45RA+ CD28- CD8+ T cell %T cell	prostate cancer	8.7934e-09	0.230497	1025.33
rs117867588	A	G	A	G	36.56	0.0139	0.0001	0.0208	8	15699657	0.0307	0.6507	140254	61106	outcome	8	6.272	3425	6.06206e-09	15699657	CD45RA+ CD28- CD8+ T cell %T cell	prostate cancer	1.3545e-08	0.2673	1248.76
rs118089863	T	C	T	C	12.62	0.028	0.0018	0.0106	19	24477916	0.0491	0.5677	140254	61106	outcome	19	2.243	3425	1.98299e-08	24477916	CD45RA+ CD28- CD8+ T cell %T cell	prostate cancer	4.71777e-08	0.57232	4580.64
rs12279408	T	C	T	C	16	0.0064	0.0007	0.0092	11	84269972	0.0451	0.888	140254	61106	outcome	11	2.92	3425	4.59505e-08	84269972	CD45RA+ CD28- CD8+ T cell %T cell	prostate cancer	7.31607e-08	0.358149	1910.01
rs12499962	G	A	G	A	25.15	0.0607	0.0006	0.0131	4	99029457	0.0362	0.0934007	140254	61106	outcome	4	3.141	3425	1.58599e-15	99029457	CD45RA+ CD28- CD8+ T cell %T cell	prostate cancer	2.40927e-14	0.758572	10755.1
rs12501785	A	G	A	G	10.8	0.0285	0.0013	0.0236	4	180565400	0.027	0.2907	140254	61106	outcome	4	1.881	3425	1.00399e-08	180565400	CD45RA+ CD28- CD8+ T cell %T cell	prostate cancer	3.79705e-08	0.30287	1487.13
rs137942933	T	G	T	G	23.37	0.0456	0.0006	0.0222	20	33104122	0.0339	0.1778	140254	61106	outcome	20	3.154	3425	1.57906e-13	33104122	CD45RA+ CD28- CD8+ T cell %T cell	prostate cancer	1.3145e-12	0.654995	6498.6
rs138327786	A	G	A	G	21.5	0.0216	0.0003	0.0142	6	1730982	0.0384	0.574101	140254	61106	outcome	6	3.886	3425	3.38104e-08	1730982	CD45RA+ CD28- CD8+ T cell %T cell	prostate cancer	7.84434e-08	0.277267	1313.19
rs140963286	T	C	T	C	33.4	-0.0706	0.0001	0.0074	1	24640467	0.0539	0.1902	140254	61106	outcome	1	5.736	3425	6.30202e-09	24640467	CD45RA+ CD28- CD8+ T cell %T cell	prostate cancer	3.01317e-08	0.22309	982.914
rs142933532	T	C	T	C	51.35	0.0024		0.0157	21	14886111	0.0502	0.9622	140254	61106	outcome	21	7.773	3425	4.53002e-11	14886111	CD45RA+ CD28- CD8+ T cell %T cell	prostate cancer	7.77279e-11
rs143395500	T	C	T	C	51.17	0.0004	0.0001	0.0204	10	69536834	0.0312	0.9889	140254	61106	outcome	10	8.845	3425	7.91608e-09	69536834	CD45RA+ CD28- CD8+ T cell %T cell	prostate cancer	1.17171e-08	0.523621	3762.46
rs143845801	C	G	C	G	18.54	-0.0502	0.0007	0.0176	7	84434549	0.0402	0.2119	140254	61106	outcome	7	2.753	3425	1.89583e-11	84434549	CD45RA+ CD28- CD8+ T cell %T cell	prostate cancer	1.15227e-10	0.480887	3170.94
rs145604620	G	A	G	A	34.45	-0.0305	0.0003	0.018	6	11491250	0.0333	0.3586	140254	61106	outcome	6	4.832	3425	1.2249e-12	11491250	CD45RA+ CD28- CD8+ T cell %T cell	prostate cancer	5.80164e-12	0.711868	8456.97
rs146822590	T	A	T	A	14.19	-0.0388	0.0009	0.0185	12	130060949	0.0375	0.301	140254	61106	outcome	12	2.379	3425	2.683e-09	130060949	CD45RA+ CD28- CD8+ T cell %T cell	prostate cancer	1.0495e-08	0.362115	1943.17
rs147093663	T	G	T	G	42.63	-0.0232	0.0001	0.0192	15	81422902	0.0399	0.560701	140254	61106	outcome	15	7.413	3425	9.65006e-09	81422902	CD45RA+ CD28- CD8+ T cell %T cell	prostate cancer	2.37582e-08	0.363427	1954.23
rs147107195	T	C	T	C	23.9	-0.0141	0.0003	0.0096	12	48190275	0.0435	0.7457	140254	61106	outcome	12	4.049	3425	3.92401e-09	48190275	CD45RA+ CD28- CD8+ T cell %T cell	prostate cancer	7.86857e-09	0.342623	1784.06
rs148658406	T	C	T	C	32.81	0.0441	0.0001	0.012	3	153311399	0.0414	0.2875	140254	61106	outcome	3	5.716	3425	1.02499e-08	153311399	CD45RA+ CD28- CD8+ T cell %T cell	prostate cancer	3.86357e-08	0.215278	939.053
rs149208831	C	A	C	A	25.69	0.0073	0.0003	0.0227	6	10017676	0.0294	0.8047	140254	61106	outcome	6	4.095	3425	3.96899e-10	10017676	CD45RA+ CD28- CD8+ T cell %T cell	prostate cancer	7.88118e-10	0.395867	2242.97
rs16864501	A	G	A	G	33.31	-0.0909	0.0001	0.0157	3	152385976	0.034	0.00744903	140254	61106	outcome	3	5.744	3425	7.30802e-09	152385976	CD45RA+ CD28- CD8+ T cell %T cell	prostate cancer	1.11543e-07	0.221889	976.115
rs17791728	C	T	C	T	15.79	0.0222	0.0006	0.0321	20	17556587	0.0261	0.394	140254	61106	outcome	20	2.811	3425	2.10402e-08	17556587	CD45RA+ CD28- CD8+ T cell %T cell	prostate cancer	6.32541e-08	0.299009	1460.09
rs180972485	A	G	A	G	12.36	0.0033	0.001	0.0125	20	24457030	0.0397	0.933	140254	61106	outcome	20	2.205	3425	2.21998e-08	24457030	CD45RA+ CD28- CD8+ T cell %T cell	prostate cancer	3.46388e-08	0.305234	1503.84
rs185587352	A	G	A	G	18.17	-0.021	0.0006	0.0136	3	117384981	0.038	0.581201	140254	61106	outcome	3	3.072	3425	3.62101e-09	117384981	CD45RA+ CD28- CD8+ T cell %T cell	prostate cancer	9.0411e-09	0.395941	2243.66
rs185754925	G	A	G	A	8.527	-0.0082	0.0025	0.0283	7	62917010	0.0419	0.8454	140254	61106	outcome	7	1.56	3425	4.90196e-08	62917010	CD45RA+ CD28- CD8+ T cell %T cell	prostate cancer	8.24323e-08	0.36264	1947.59
rs189796120	T	C	T	C	4.47	0.0074	0.0099	0.0103	11	109281106	0.0456	0.8717	140254	61106	outcome	11	0.763	3425	5.13594e-09	109281106	CD45RA+ CD28- CD8+ T cell %T cell	prostate cancer	8.78052e-09	0.391705	2204.21
rs190665193	G	A	G	A	35.37	-0.014	0.0003	0.0171	2	106438361	0.039	0.7193	140254	61106	outcome	2	4.058	3425	4.43507e-18	106438361	CD45RA+ CD28- CD8+ T cell %T cell	prostate cancer	1.54808e-17	0.750397	10290.8
rs191923221	A	G	A	G	4.991	0.0106	0.0072	0.0066	19	18858754	0.054	0.8444	140254	61106	outcome	19	0.8815	3425	1.62002e-08	18858754	CD45RA+ CD28- CD8+ T cell %T cell	prostate cancer	2.78726e-08	0.356122	1893.23
rs34039708	A	C	A	C	12.51	-0.0908	0.0019	0.0099	8	12500832	0.0573	0.113	140254	61106	outcome	8	1.85	3425	1.58416e-11	12500832	CD45RA+ CD28- CD8+ T cell %T cell	prostate cancer	1.35535e-10	0.59357	4999.12
rs35068665	G	T	G	T	53.41	0.0285	0.0001	0.0129	14	101798387	0.049	0.560899	140254	61106	outcome	14	5.65	3425	5.86813e-21	101798387	CD45RA+ CD28- CD8+ T cell %T cell	prostate cancer	3.30552e-20	0.570469	4546.15
rs35772393	T	C	T	C	38.7	0.1017		0.0096	16	47727514	0.0474	0.0319499	140254	61106	outcome	16	6.463	3425	2.34202e-09	47727514	CD45RA+ CD28- CD8+ T cell %T cell	prostate cancer	2.49064e-08
rs375356899	G	A	G	A	4.521	-0.0305	0.0092	0.015	6	165166578	0.0336	0.3634	140254	61106	outcome	6	0.8043	3425	2.04099e-08	165166578	CD45RA+ CD28- CD8+ T cell %T cell	prostate cancer	6.50682e-08	0.372626	2033.07
rs41276984	G	C	G	C	15.14	0.0027	0.0012	0.0207	20	37580670	0.03	0.9282	140254	61106	outcome	20	2.254	3425	2.20191e-11	37580670	CD45RA+ CD28- CD8+ T cell %T cell	prostate cancer	3.91859e-11	0.549467	4174.67
rs4853078	G	T	G	T	9.274	0.047	0.0019	0.012	2	75148081	0.0476	0.3232	140254	61106	outcome	2	1.681	3425	3.74197e-08	75148081	CD45RA+ CD28- CD8+ T cell %T cell	prostate cancer	1.22563e-07	0.326206	1657.19
rs62218442	A	T	A	T	15.67	0.001	0.0007	0.0233	22	23072586	0.0352	0.9764	140254	61106	outcome	22	2.862	3425	4.64997e-08	23072586	CD45RA+ CD28- CD8+ T cell %T cell	prostate cancer	6.79319e-08	0.343528	1791.23
rs62321187	T	C	T	C	49	0.0341	0.0001	0.0183	4	120605817	0.0341	0.318	140254	61106	outcome	4	5.703	3425	1.26386e-17	120605817	CD45RA+ CD28- CD8+ T cell %T cell	prostate cancer	1.01306e-16	0.480152	3161.62
rs72758450	C	T	C	T	33.05	-0.0426	0.0001	0.018	15	69811049	0.0398	0.2846	140254	61106	outcome	15	5.644	3425	5.188e-09	69811049	CD45RA+ CD28- CD8+ T cell %T cell	prostate cancer	2.02359e-08	0.218439	956.695
rs72931475	G	A	G	A	31.04	0.0376	0.0003	0.0103	2	159316835	0.0477	0.4305	140254	61106	outcome	2	4.31	3425	7.30466e-13	159316835	CD45RA+ CD28- CD8+ T cell %T cell	prostate cancer	3.05794e-12	0.577916	4686.75
rs75438005	A	G	A	G	38.95	0.0114	0.0001	0.0105	18	26017285	0.0409	0.7807	140254	61106	outcome	18	5.695	3425	9.31108e-12	26017285	CD45RA+ CD28- CD8+ T cell %T cell	prostate cancer	2.11154e-11	0.30339	1490.8
rs75993384	C	T	C	T	38.22	0.0278	0.0001	0.033	4	55305871	0.0255	0.2747	140254	61106	outcome	4	4.737	3425	9.73419e-16	55305871	CD45RA+ CD28- CD8+ T cell %T cell	prostate cancer	7.41079e-15	0.292124	1412.6
rs76444609	A	G	A	G	51.58	0.0699	0.0001	0.015	1	249084997	0.0454	0.1235	140254	61106	outcome	1	5.751	3425	4.81615e-19	249084997	CD45RA+ CD28- CD8+ T cell %T cell	prostate cancer	8.83633e-18	0.532046	3891.82
rs76552842	A	G	A	G	49.64	0.0101	0.0001	0.0163	11	83433494	0.0341	0.7665	140254	61106	outcome	11	5.557	3425	6.60237e-19	83433494	CD45RA+ CD28- CD8+ T cell %T cell	prostate cancer	2.23167e-18	0.492777	3325.51
rs77113660	G	A	G	A	52.91	0.0474	0.0001	0.0188	12	83249816	0.0369	0.1986	140254	61106	outcome	12	5.64	3425	1.15611e-20	83249816	CD45RA+ CD28- CD8+ T cell %T cell	prostate cancer	1.71745e-19	0.559838	4353.68
rs77214871	T	A	T	A	46.69	0.0777	0.0001	0.0109	13	84005540	0.0414	0.0608695	140254	61106	outcome	13	5.344	3425	3.68638e-18	84005540	CD45RA+ CD28- CD8+ T cell %T cell	prostate cancer	9.60599e-17	0.435948	2645.59
rs77465871	G	A	G	A	13.03	0.0116	0.0015	0.015	7	47504039	0.0406	0.7757	140254	61106	outcome	7	1.94	3425	2.13304e-11	47504039	CD45RA+ CD28- CD8+ T cell %T cell	prostate cancer	4.81734e-11	0.508579	3542.51
rs78088167	G	A	G	A	19.81	0.0138	0.0006	0.0228	4	130098084	0.0294	0.6388	140254	61106	outcome	4	3.224	3425	8.98607e-10	130098084	CD45RA+ CD28- CD8+ T cell %T cell	prostate cancer	2.14413e-09	0.470641	3043.31
rs78750136	C	T	C	T	100.8	0.0511		0.0181	14	26308944	0.0368	0.1649	140254	61106	outcome	14	11.59	3425	5.21075e-18	26308944	CD45RA+ CD28- CD8+ T cell %T cell	prostate cancer	7.05742e-17
rs79027575	C	T	C	T	9.036	-0.0038	0.0022	0.0117	2	146371302	0.0419	0.9277	140254	61106	outcome	2	1.652	3425	4.83704e-08	146371302	CD45RA+ CD28- CD8+ T cell %T cell	prostate cancer	7.38366e-08	0.358467	1912.65
rs79395509	T	C	T	C	26.23	0.0023	0.0006	0.0099	4	176348299	0.0492	0.9622	140254	61106	outcome	4	4.191	3425	4.38198e-10	176348299	CD45RA+ CD28- CD8+ T cell %T cell	prostate cancer	7.10122e-10	0.82512	16150.4
rs79518488	C	T	C	T	24.55	0.0492	0.0003	0.0075	6	28389143	0.0454	0.2784	140254	61106	outcome	6	4.474	3425	4.37401e-08	28389143	CD45RA+ CD28- CD8+ T cell %T cell	prostate cancer	1.55806e-07	0.361513	1938.11
rs79647440	T	C	T	C	37.38	0.029	0.0004	0.0126	7	142438302	0.0483	0.5488	140254	61106	outcome	7	4.922	3425	3.94003e-14	142438302	CD45RA+ CD28- CD8+ T cell %T cell	prostate cancer	1.4814e-13	1.11736	-32588.6
rs79851411	A	G	A	G	35.15	-0.0251	0.0001	0.0138	8	13716390	0.042	0.550201	140254	61106	outcome	8	5.793	3425	1.439e-09	13716390	CD45RA+ CD28- CD8+ T cell %T cell	prostate cancer	3.83464e-09	0.24708	1123.3
rs113530150	T	C	T	C	-0.3778	-0.0514	0.0742	0.0427	22	40567196	0.0206	0.01278	140254	61106	outcome	22	0.04889	3657	1.40088e-14	40567196	BAFF-R on IgD- CD27- B cell	prostate cancer	5.61337e-13	0.0196099	73.1078
rs118137006	C	A	C	A	-0.6722	0.0481	0.015	0.0135	22	40727723	0.0419	0.2509	140254	61106	outcome	22	0.1043	3657	1.305e-10	40727723	BAFF-R on IgD- CD27- B cell	prostate cancer	6.97136e-10	0.0133523	49.4629
rs13058590	T	C	T	C	-0.3797	0.0113	0.0468	0.0176	22	39641412	0.0341	0.7405	140254	61106	outcome	22	0.05894	3657	1.32898e-10	39641412	BAFF-R on IgD- CD27- B cell	prostate cancer	3.09023e-10	0.012863	47.6268
rs142780018	A	G	A	G	-0.3313	-0.0801	0.0463	0.0134	22	44395926	0.0429	0.0618102	140254	61106	outcome	22	0.05854	3657	1.62798e-08	44395926	BAFF-R on IgD- CD27- B cell	prostate cancer	1.28724e-07	0.00969317	35.7753
rs146069723	T	C	T	C	-0.5638	0.1283	0.0756	0.0153	22	43339331	0.0323	7.26106e-05	140254	61106	outcome	22	0.04748	3657	6.25029e-32	43339331	BAFF-R on IgD- CD27- B cell	prostate cancer	3.26707e-28	0.0444285	169.936
rs150612106	A	G	A	G	-0.725	-0.0158	0.0261	0.0177	22	40175781	0.0325	0.6273	140254	61106	outcome	22	0.07793	3657	2.28823e-20	40175781	BAFF-R on IgD- CD27- B cell	prostate cancer	1.19276e-19	0.0267215	100.349
rs191405504	T	A	T	A	-0.5312	-0.0357	0.0535	0.0157	22	41305796	0.0389	0.359	140254	61106	outcome	22	0.05816	3657	1.06905e-19	41305796	BAFF-R on IgD- CD27- B cell	prostate cancer	9.98267e-19	0.0285773	107.523
rs4657041	C	T	C	T	-0.1503	-0.0078	0.3344	0.5086	1	161478859	0.0082	0.3437	140254	61106	outcome	1	0.02684	3657	2.28902e-08	161478859	BAFF-R on IgD- CD27- B cell	prostate cancer	7.95727e-08	0.0100561	37.1282
rs5758649	T	C	T	C	-0.5779	0.0151	0.0871	0.0275	22	42605548	0.0261	0.5629	140254	61106	outcome	22	0.04464	3657	1.62705e-37	42605548	BAFF-R on IgD- CD27- B cell	prostate cancer	2.37435e-36	0.0531101	205.005
rs73165129	T	C	T	C	-1.439	0.0018	0.099	0.0803	22	42315371	0.0148	0.904	140254	61106	outcome	22	0.03429	3657	1e-200	42315371	BAFF-R on IgD- CD27- B cell	prostate cancer	0	0.369412	2141.18
rs9614288	T	A	T	A	-0.2875	0.0152	0.2346	0.2413	22	44297686	0.0109	0.1634	140254	61106	outcome	22	0.02904	3657	7.9965e-23	44297686	BAFF-R on IgD- CD27- B cell	prostate cancer	1.96361e-21	0.029684	111.814
rs149192849	C	T	C	T	-0.3114	-0.0358	0.0536	0.0277	22	42270864	0.025	0.1524	140254	61106	outcome	22	0.0547	3659	1.34899e-08	42270864	BAFF-R on IgD- CD38+ B cell	prostate cancer	7.33322e-08	0.009838	36.335
rs4822134	C	T	C	T	0.1467	0.0037	0.4057	0.415	22	42867332	0.0087	0.675199	140254	61106	outcome	22	0.02525	3659	6.78203e-09	42867332	BAFF-R on IgD- CD38+ B cell	prostate cancer	1.52908e-08	0.0103777	38.3492
rs73165129	T	C	T	C	-0.5288	0.0018	0.0991	0.0803	22	42315371	0.0148	0.904	140254	61106	outcome	22	0.04055	3659	4.96249e-38	42315371	BAFF-R on IgD- CD38+ B cell	prostate cancer	2.9202e-37	0.0499302	192.191
rs11598494	C	T	C	T	-0.1762	0.0001	0.5587	0.3454	10	6178941	0.0084	0.9911	140254	61106	outcome	10	0.02445	3657	6.79047e-13	6178941	CD25 on CD24+ CD27+ B cell	prostate cancer	1.29489e-12	0.0153093	56.8253
rs1887027	T	C	T	C	-0.4244	-0.0117	0.2454	0.2132	10	6113782	0.0099	0.2342	140254	61106	outcome	10	0.0273	3657	8.06306e-53	6113782	CD25 on CD24+ CD27+ B cell	prostate cancer	8.22373e-51	0.0667071	261.241
rs3793662	T	C	T	C	-0.1594	0.0016	0.7759	0.8052	9	95886051	0.0102	0.8731	140254	61106	outcome	9	0.0289	3657	3.74904e-08	95886051	CD25 on CD24+ CD27+ B cell	prostate cancer	6.23836e-08	0.00883597	32.5834
rs4747882	T	A	T	A	-0.2267	0.0175	0.7132	0.7695	10	6162476	0.0095	0.0656901	140254	61106	outcome	10	0.02692	3657	5.31741e-17	6162476	CD25 on CD24+ CD27+ B cell	prostate cancer	1.32417e-15	0.0210244	78.4945
rs1801274	G	A	G	A	-0.3112	-0.0078	0.3166	0.5082	1	161479745	0.0082	0.3417	140254	61106	outcome	1	0.03296	1838	1.06292e-20	161479745	CD27 on T cell	prostate cancer	3.72743e-20	0.0419078	80.3083
rs11064198	T	A	T	A	-0.225	-0.0109	0.1256	0.1992	12	6558720	0.0104	0.292	140254	61106	outcome	12	0.03691	3657	1.19201e-09	6558720	CD27 on IgD- CD38- B cell	prostate cancer	5.21891e-09	0.0111197	41.0997
rs162076	A	G	A	G	-0.143	-0.0009	0.555	0.5833	20	46785499	0.0084	0.9143	140254	61106	outcome	20	0.02522	3657	1.54e-08	46785499	CD27 on IgD- CD38- B cell	prostate cancer	2.5235e-08	0.0101008	37.2951
rs1801274	G	A	G	A	-0.2111	-0.0078	0.325	0.5082	1	161479745	0.0082	0.3417	140254	61106	outcome	1	0.02661	3657	2.77013e-15	161479745	CD27 on IgD- CD38- B cell	prostate cancer	1.90628e-14	0.0195521	72.8881
rs1883832	C	T	C	T	-0.4707	-0.001	0.6318	0.743	20	44746982	0.0093	0.9127	140254	61106	outcome	20	0.02507	3657	3.83354e-75	44746982	CD27 on IgD- CD38- B cell	prostate cancer	2.97354e-74	0.103082	420.065
rs2250246	G	A	G	A	-0.2059	-0.0067	0.5339	0.5931	12	6553016	0.0088	0.448	140254	61106	outcome	12	0.02456	3657	7.42335e-17	6553016	CD27 on IgD- CD38- B cell	prostate cancer	4.3758e-16	0.0211	78.7827
rs35574803	C	T	C	T	0.6071	0.0389	0.0562	0.0222	3	32533246	0.0298	0.192	140254	61106	outcome	3	0.05356	3657	2.73905e-29	32533246	CD27 on IgD- CD38- B cell	prostate cancer	9.661e-28	0.0390991	148.722
rs75918255	A	G	A	G	0.4158	-0.0097	0.035	0.0232	3	32945761	0.0332	0.769501	140254	61106	outcome	3	0.06821	3657	1.19801e-09	32945761	CD27 on IgD- CD38- B cell	prostate cancer	2.51527e-09	0.0116787	43.19
rs200468	G	C	G	C	-0.179	-0.0268	0.3113	0.1717	6	27757855	0.0106	0.0111699	140254	61106	outcome	6	0.03009	3656	2.91803e-09	27757855	IgD on IgD+ CD38+ B cell	prostate cancer	4.76759e-08	0.0137387	50.9005
rs2018404	T	C	T	C	-0.2711	0.0021	0.1325	0.1774	14	105695446	0.0131	0.8718	140254	61106	outcome	14	0.03734	3656	4.68598e-13	105695446	IgD on IgD+ CD38+ B cell	prostate cancer	1.04896e-12	0.0168956	62.7976
rs2338377	A	G	A	G	0.3485	0.0221	0.0747	0.2269	14	106671275	0.0177	0.2107	140254	61106	outcome	14	0.06024	3656	7.86502e-09	106671275	IgD on IgD+ CD38+ B cell	prostate cancer	3.73602e-08	0.0167895	62.3966
rs28669075	T	C	T	C	-0.1665	0.0127	0.4074	0.431	15	40856521	0.0081	0.1148	140254	61106	outcome	15	0.02485	3656	2.44006e-11	40856521	IgD on IgD+ CD38+ B cell	prostate cancer	2.14711e-10	0.0133857	49.5749
rs62442539	C	G	C	G	0.2603	-0.0072	0.2802	0.2737	7	2352594	0.0096	0.4513	140254	61106	outcome	7	0.0276	3656	6.79516e-21	2352594	IgD on IgD+ CD38+ B cell	prostate cancer	5.56024e-20	0.0273312	102.674
rs709589	T	C	T	C	-0.7004	0.0005	0.4557	0.4292	14	106306841	0.0123	0.9698	140254	61106	outcome	14	0.0293	3656	2.04644e-117	106306841	IgD on IgD+ CD38+ B cell	prostate cancer	3.37474e-117	0.243355	1175.21
rs12752576	G	A	G	A	-0.7097	0.029	0.0154	0.0403	1	168605042	0.0217	0.1809	140254	61106	outcome	1	0.1107	2919	1.66001e-10	168605042	CD3 on secreting CD4 regulatory T cell	prostate cancer	8.31589e-10	0.0152743	45.2461
rs2949661	T	C	T	C	0.6149	0.0114	0.4466	0.3684	1	167424924	0.0085	0.1775	140254	61106	outcome	1	0.02529	2919	4.32514e-119	167424924	CD3 on secreting CD4 regulatory T cell	prostate cancer	2.71316e-118	0.186895	670.481
rs61814886	A	G	A	G	0.3112	-0.0067	0.1059	0.1187	1	167136405	0.0126	0.5961	140254	61106	outcome	1	0.04424	2919	2.47002e-12	167136405	CD3 on secreting CD4 regulatory T cell	prostate cancer	6.61482e-12	0.0183397	54.4962
rs2227313	C	T	C	T	0.2382	0.0148	0.5747	0.4809	1	2487766	0.0085	0.0797903	140254	61106	outcome	1	0.03976	1245	2.74e-09	2487766	HVEM on Terminally Differentiated CD4+ T cell	prostate cancer	7.8925e-09	0.0277364	35.4599
rs56199187	T	C	T	C	0.2389	-0.0192	0.2402	0.1179	1	161520931	0.0136	0.1567	140254	61106	outcome	1	0.03108	2971	2.02582e-14	161520931	CD16-CD56 on HLA DR+ Natural Killer	prostate cancer	1.61851e-13	0.0208322	63.1666
rs78358948	A	G	A	G	-0.3396	-0.0035	0.1096	0.0318	11	112751974	0.0261	0.8944	140254	61106	outcome	11	0.04218	2971	1.16788e-15	112751974	CD16-CD56 on HLA DR+ Natural Killer	prostate cancer	2.4137e-15	0.0225093	68.3689
rs56216383	G	A	G	A	-0.4779	0.008	0.1976	0.1687	2	204631712	0.011	0.468	140254	61106	outcome	2	0.03389	2920	9.68947e-44	204631712	CD28 on CD28+ CD45RA- CD8+ T cell	prostate cancer	1.05684e-42	0.0724239	227.834
rs1973872	G	T	G	T	0.3661	-0.0032	0.601	0.7312	2	204631016	0.0094	0.735201	140254	61106	outcome	2	0.02791	2920	3.15065e-38	204631016	CD28 on CD4+ T cell	prostate cancer	1.48408e-37	0.0642801	200.455
rs72928038	A	G	A	G	0.233	-0.0015	0.199	0.1658	6	90976768	0.0119	0.9004	140254	61106	outcome	6	0.03402	2920	9.00326e-12	90976768	CD28 on CD4+ T cell	prostate cancer	1.56653e-11	0.0173072	51.3919
rs117653391	A	G	A	G	0.4455	-0.0229	0.0449	0.0486	10	97551952	0.0189	0.2273	140254	61106	outcome	10	0.06505	2650	9.29394e-12	97551952	CD28 on CD39+ resting CD4 regulatory T cell	prostate cancer	4.14509e-11	0.0170224	45.8559
rs4707609	C	T	C	T	0.1619	0.0046	0.4387	0.3446	6	90946479	0.0084	0.581	140254	61106	outcome	6	0.0273	2650	3.44398e-09	90946479	CD28 on CD39+ resting CD4 regulatory T cell	prostate cancer	7.18028e-09	0.0129088	34.6296
rs116105787	T	A	T	A	1.124	0.0335	0.0044	0.0173	4	167699242	0.034	0.3256	140254	61106	outcome	4	0.2001	2871	2.157e-08	167699242	CD86 on CD62L+ myeloid Dendritic Cell	prostate cancer	6.30118e-08	0.0110688	32.1118
rs12675298	A	G	A	G	-0.5258	-0.0296	0.0277	0.0156	8	6828813	0.0413	0.4737	140254	61106	outcome	8	0.08507	2848	7.25103e-10	6828813	CD86 on granulocyte	prostate cancer	1.93342e-09	0.0148919	43.0232
rs147174426	T	A	T	A	0.2667	-0.0105	0.1692	0.0635	1	161528012	0.0183	0.5646	140254	61106	outcome	1	0.0325	3618	3.19521e-16	161528012	CCR2 on CD14+ CD16+ monocyte	prostate cancer	1.4008e-15	0.0199974	73.786
rs77640671	T	C	T	C	0.3476	-0.0438	0.0401	0.0275	16	58607804	0.0284	0.1232	140254	61106	outcome	16	0.06205	3618	2.29298e-08	58607804	CCR2 on CD14+ CD16+ monocyte	prostate cancer	1.30673e-07	0.00930165	33.9506
rs1800973	A	C	A	C	-0.2797	-0.0181	0.0798	0.0717	12	69744014	0.0175	0.2999	140254	61106	outcome	12	0.04402	3629	2.36903e-10	69744014	PDL-1 on CD14- CD16-	prostate cancer	1.0827e-09	0.0114895	42.1567
rs150145799	C	T	C	T	0.2881	0.0387	0.1327	0.0803	1	149738590	0.0165	0.0190498	140254	61106	outcome	1	0.0365	3622	3.91922e-15	149738590	CD64 on CD14- CD16-	prostate cancer	1.38254e-13	0.0191054	70.5088
rs141411805	G	C	G	C	-0.5993	0.0206	0.0146	0.0121	3	53544015	0.0442	0.640801	140254	61106	outcome	3	0.1027	3629	5.80403e-09	53544015	CCR2 on CD14+ CD16- monocyte	prostate cancer	1.36532e-08	0.0103344	37.8742
rs4683184	A	G	A	G	0.2454	-0.0038	0.6904	0.6361	3	46187707	0.0084	0.6481	140254	61106	outcome	3	0.02618	3629	1.17004e-20	46187707	CCR2 on CD14+ CD16- monocyte	prostate cancer	5.98253e-20	0.0257443	95.8419
rs6808587	C	G	C	G	-0.4165	0.0056	0.0336	0.0439	3	46875690	0.0199	0.7771	140254	61106	outcome	3	0.06803	3629	1.02301e-09	46875690	CCR2 on CD14+ CD16- monocyte	prostate cancer	2.11407e-09	0.0112656	41.3261
rs11615628	A	G	A	G	-0.2753	0.0124	0.2464	0.2929	12	6903631	0.0096	0.1981	140254	61106	outcome	12	0.03163	2912	5.30762e-18	6903631	CD4 on CD4+ T cell	prostate cancer	4.76584e-17	0.0281465	84.2784
rs2395191	C	T	C	T	0.1751	-0.0262	0.3703	0.6562	6	32447085	0.0083	0.001702	140254	61106	outcome	6	0.02906	3103	1.88799e-09	32447085	CD8 on Natural Killer T	prostate cancer	4.17611e-08	0.0142985	44.9828
rs34613828	T	A	T	A	-0.2358	-0.0031	0.1937	0.2409	2	87022759	0.0104	0.7614	140254	61106	outcome	2	0.03313	3103	1.36616e-12	87022759	CD8 on Natural Killer T	prostate cancer	3.03608e-12	0.0173678	54.8093
rs1006368	T	C	T	C	0.4144	0.0296	0.1224	0.1117	10	126346603	0.0126	0.01882	140254	61106	outcome	10	0.04052	3113	3.61327e-24	126346603	SSC-A on Natural Killer	prostate cancer	2.67898e-22	0.0368933	119.172
rs113861918	T	C	T	C	-0.215	0.011	0.1677	0.1111	19	52129097	0.014	0.4317	140254	61106	outcome	19	0.03692	2850	6.41904e-09	52129097	CD11c on granulocyte	prostate cancer	1.6812e-08	0.0129039	37.2306
rs1801274	G	A	G	A	0.248	-0.0078	0.3209	0.5082	1	161479745	0.0082	0.3417	140254	61106	outcome	1	0.02982	2850	1.36395e-16	161479745	CD11c on granulocyte	prostate cancer	7.333e-16	0.0268063	78.4472
rs28432694	T	A	T	A	-0.1719	0.0095	0.3077	0.3613	16	48666310	0.0084	0.2583	140254	61106	outcome	16	0.03042	2850	1.74598e-08	48666310	CD11c on granulocyte	prostate cancer	5.84472e-08	0.0125894	36.3116
rs8046381	C	T	C	T	0.4684	0.0112	0.8668	0.9277	16	31379355	0.0182	0.5364	140254	61106	outcome	16	0.04088	2850	9.63385e-30	31379355	CD11c on granulocyte	prostate cancer	5.76942e-29	0.0506625	151.987
rs11124653	A	C	A	C	-0.2555	-0.0004	0.5925	0.6084	2	39112166	0.0083	0.9624	140254	61106	outcome	2	0.02636	2919	6.84069e-22	39112166	CD45RA on resting CD4 regulatory T cell	prostate cancer	1.51016e-21	0.031523	94.9456
rs113435341	G	A	G	A	2.31	-0.0424	0.0029	0.0194	1	198151688	0.0318	0.1815	140254	61106	outcome	1	0.238	2919	6.19156e-22	198151688	CD45RA on resting CD4 regulatory T cell	prostate cancer	7.70392e-21	0.0308596	92.8839
rs11579717	A	G	A	G	1.499	0.011	0.0041	0.0434	1	199999121	0.0222	0.62	140254	61106	outcome	1	0.1979	2919	4.73915e-14	199999121	CD45RA on resting CD4 regulatory T cell	prostate cancer	1.35529e-13	0.0183499	54.5271
rs138915779	A	C	A	C	1.586	0.0528	0.0033	0.0162	1	190079170	0.035	0.1315	140254	61106	outcome	1	0.2396	2919	4.27563e-11	190079170	CD45RA on resting CD4 regulatory T cell	prostate cancer	2.63432e-10	0.0165468	49.0792
rs2565661	A	T	A	T	-0.2921	-0.0249	0.9156	0.8851	2	38132650	0.0133	0.0607701	140254	61106	outcome	2	0.0468	2919	4.93003e-10	38132650	CD45RA on resting CD4 regulatory T cell	prostate cancer	3.73207e-09	0.0131869	38.9801
rs78689347	C	A	C	A	0.698	-0.0282	0.0149	0.0328	2	40773763	0.0236	0.2327	140254	61106	outcome	2	0.1104	2919	3.00303e-10	40773763	CD45RA on resting CD4 regulatory T cell	prostate cancer	1.26376e-09	0.0143024	42.3253
rs13004867	G	C	G	C	-0.4974	-0.001	0.1175	0.1388	2	86982504	0.013	0.9392	140254	61106	outcome	2	0.04176	2920	5.63248e-32	86982504	CD8 on CD28+ CD45RA- CD8+ T cell	prostate cancer	1.56668e-31	0.0513091	157.817
rs56262516	A	G	A	G	0.2531	-0.0106	0.2757	0.0654	6	29930939	0.016	0.5076	140254	61106	outcome	6	0.03508	2920	6.74839e-13	29930939	CD8 on CD28+ CD45RA- CD8+ T cell	prostate cancer	2.15281e-12	0.0255841	76.6144
rs55971447	T	C	T	C	-0.3011	-0.0202	0.2352	0.1176	1	161515326	0.0134	0.1325	140254	61106	outcome	6.69885e-25	1	161515326	0.02899	3410	CD62L- plasmacytoid Dendritic Cell %Dendritic Cell	prostate cancer	1.95294e-23	0.0326165	114.905
rs6535445	C	T	C	T	-0.3029	-0.0066	0.344	0.3382	4	84151427	0.0087	0.4494	140254	61106	outcome	1.34803e-31	4	84151427	0.02564	3410	CD62L- plasmacytoid Dendritic Cell %Dendritic Cell	prostate cancer	1.74387e-30	0.0414086	147.217
rs115805162	T	C	T	C	-0.3069	-0.0042	0.2084	0.0657	1	161410253	0.0172	0.8093	140254	61106	outcome	4.1783e-20	1	161410253	0.03321	3410	CD62L- CD86+ myeloid Dendritic Cell %Dendritic Cell	prostate cancer	1.37443e-19	0.0310762	109.304
rs143140559	T	C	T	C	0.71	0.0464	0.0094	0.0138	1	160972255	0.037	0.2104	140254	61106	outcome	3.879e-08	1	160972255	0.1289	3410	CD62L- CD86+ myeloid Dendritic Cell %Dendritic Cell	prostate cancer	1.60164e-07	0.009388	32.2975
rs3933769	G	A	G	A	-0.2076	0.0046	0.6129	0.7568	1	161559327	0.0111	0.6742	140254	61106	outcome	1.88799e-13	1	161559327	0.02811	3410	CD62L- CD86+ myeloid Dendritic Cell %Dendritic Cell	prostate cancer	5.47489e-13	0.0204502	71.1493
rs71632979	G	A	G	A	0.929	-0.0188	0.2447	0.1189	1	161526397	0.0135	0.1661	140254	61106	outcome	1e-200	1	161526397	0.0268	3410	CD62L- CD86+ myeloid Dendritic Cell %Dendritic Cell	prostate cancer	1.17892e-228	0.319018	1596.54
rs71639910	A	G	A	G	0.4245	-0.014	0.0688	0.0287	1	161937774	0.0254	0.5806	140254	61106	outcome	3.15864e-16	1	161937774	0.05172	3410	CD62L- CD86+ myeloid Dendritic Cell %Dendritic Cell	prostate cancer	1.27285e-15	0.0230896	80.5493
rs75072970	C	T	C	T	0.4126	-0.0113	0.0531	0.0425	1	161058351	0.0216	0.6026	140254	61106	outcome	1.962e-12	1	161058351	0.05841	3410	CD62L- CD86+ myeloid Dendritic Cell %Dendritic Cell	prostate cancer	5.93979e-12	0.0171193	59.3589
rs116794175	C	T	C	T	-1.101	-0.0242	0.0042	0.0063	1	194010208	0.0618	0.696	140254	61106	outcome	2.45901e-08	1	194010208	0.1969	3437	CD25++ CD45RA- CD4 not regulatory T cell %CD4+ T cell	prostate cancer	4.90387e-08	0.0101397	35.1867
rs17583875	A	G	A	G	-1.737	-0.0122	0.0029	0.0252	1	197924770	0.0286	0.6697	140254	61106	outcome	7.08272e-14	1	197924770	0.2311	3437	CD25++ CD45RA- CD4 not regulatory T cell %CD4+ T cell	prostate cancer	2.1578e-13	0.0174488	61.0011
rs61839660	T	C	T	C	0.6146	-0.0205	0.0543	0.0865	10	6094697	0.0143	0.1509	140254	61106	outcome	2.77588e-28	10	6094697	0.05523	3437	CD25++ CD45RA- CD4 not regulatory T cell %CD4+ T cell	prostate cancer	9.53854e-27	0.0387943	138.637
rs115937242	A	G	A	G	1.543	0.0131	0.0086	0.0189	2	136121922	0.0387	0.7349	140254	61106	outcome	2.30303e-18	2	136121922	0.1747	1858	Hematopoietic Stem Cell Absolute Count	prostate cancer	4.20536e-18	0.0405984	78.5393
rs74529033	G	A	G	A	1.453	0.0022	0.0081	0.0155	2	137747326	0.0362	0.9511	140254	61106	outcome	1.9971e-15	2	137747326	0.1814	1858	Hematopoietic Stem Cell Absolute Count	prostate cancer	2.71726e-15	0.0339246	65.175
rs113243185	C	G	C	G	-0.2104	-0.0176	0.1996	0.1294	6	32585071	0.012	0.1439	140254	61106	outcome	8.06102e-09	6	32585071	0.03639	3427	Naive CD4+ T cell %CD4+ T cell	prostate cancer	4.35052e-08	0.0141445	49.1401
rs12712610	G	A	G	A	0.1457	-0.0188	0.2969	0.1786	2	38897249	0.0113	0.0953301	140254	61106	outcome	1.17501e-08	2	38897249	0.02548	3427	Naive CD4+ T cell %CD4+ T cell	prostate cancer	7.32326e-08	0.00886291	30.6269
rs146620586	T	G	T	G	1.495	-0.0372	0.0032	0.0173	1	198524264	0.0373	0.3183	140254	61106	outcome	1.012e-08	1	198524264	0.2604	3427	Naive CD4+ T cell %CD4+ T cell	prostate cancer	3.61907e-08	0.0142584	49.5414
rs9271536	T	A	T	A	0.2324	-0.0183	0.7798	0.8057	6	32589978	0.01	0.0688002	140254	61106	outcome	3.59832e-12	6	32589978	0.03331	3427	Naive CD4+ T cell %CD4+ T cell	prostate cancer	4.29533e-11	0.0185482	64.7283
rs2523614	C	T	C	T	-0.1522	-0.022	0.2642	0.2841	6	31320654	0.0089	0.0133401	140254	61106	outcome	6.09902e-09	6	31320654	0.02611	3427	Naive CD4-CD8- T cell %T cell	prostate cancer	7.98844e-08	0.00900641	31.1273
rs3184504	C	T	C	T	-0.1468	0.0187	0.5304	0.5189	12	111884608	0.0082	0.0218102	140254	61106	outcome	2.64698e-08	12	111884608	0.02633	3653	T cell Absolute Count	prostate cancer	2.8592e-07	0.0107353	39.6199
rs9271629	A	C	A	C	0.2148	-0.018	0.7416	0.8061	6	32591976	0.01	0.0728702	140254	61106	outcome	2.266e-10	6	32591976	0.03378	3653	T cell Absolute Count	prostate cancer	2.25104e-09	0.0176832	65.7236
rs1322067	G	A	G	A	-0.1511	-0.0057	0.4173	0.4431	9	117660933	0.0082	0.4897	140254	61106	outcome	4.75401e-09	9	117660933	0.02575	3579	HLA DR+ CD4+ T cell Absolute Count	prostate cancer	1.38785e-08	0.0111033	40.1625
rs3087456	A	G	A	G	-0.2926	0.0012	0.766	0.7348	16	10970902	0.0096	0.897	140254	61106	outcome	1.39798e-25	16	10970902	0.02777	3579	HLA DR+ CD4+ T cell Absolute Count	prostate cancer	5.12931e-25	0.0306919	113.261
rs78268116	T	C	T	C	-0.3961	0.0079	0.1095	0.0337	11	112705025	0.0241	0.743201	140254	61106	outcome	2.18424e-24	11	112705025	0.03859	3668	CD8+ Natural Killer T %lymphocyte	prostate cancer	1.11186e-23	0.0305976	115.711
rs4796089	C	T	C	T	0.2194	-0.0038	0.134	0.089	17	33814758	0.0148	0.7971	140254	61106	outcome	2.98903e-09	17	33814758	0.0369	3669	CD3- lymphocyte %leukocyte	prostate cancer	5.94087e-09	0.0111719	41.4301
rs12865434	G	A	G	A	0.1537	-0.0153	0.4777	0.2311	13	108970631	0.0104	0.1403	140254	61106	outcome	1.834e-10	13	108970631	0.02404	3653	B cell Absolute Count	prostate cancer	1.31933e-09	0.0117883	43.5527
rs4796089	C	T	C	T	-0.2435	-0.0038	0.1343	0.089	17	33814758	0.0148	0.7971	140254	61106	outcome	6.12915e-11	17	33814758	0.0371	3440	CD28- CD4-CD8- T cell %CD4-CD8- T cell	prostate cancer	1.27391e-10	0.0137871	48.0625
rs117086217	G	A	G	A	-0.5014	-0.0397	0.0343	0.0242	22	39876838	0.0302	0.188	140254	61106	outcome	1.08493e-13	22	39876838	0.06723	3657	BAFF-R on CD24+ CD27+ B cell	prostate cancer	9.7734e-13	0.0166546	61.9037
rs118137006	C	A	C	A	-0.7507	0.0481	0.015	0.0135	22	40727723	0.0419	0.2509	140254	61106	outcome	8.8736e-13	22	40727723	0.1047	3657	BAFF-R on CD24+ CD27+ B cell	prostate cancer	6.06929e-12	0.0166529	61.8972
rs13058590	T	C	T	C	-0.3738	0.0113	0.0468	0.0176	22	39641412	0.0341	0.7405	140254	61106	outcome	3.16199e-10	22	39641412	0.05926	3657	BAFF-R on CD24+ CD27+ B cell	prostate cancer	7.16957e-10	0.0124663	46.1396
rs143944768	T	C	T	C	-0.3468	-0.086	0.0463	0.0134	22	44378670	0.043	0.0454695	140254	61106	outcome	4.02903e-09	22	44378670	0.0588	3657	BAFF-R on CD24+ CD27+ B cell	prostate cancer	3.93124e-08	0.0106214	39.2379
rs146069723	T	C	T	C	-0.574	0.1283	0.0756	0.0153	22	43339331	0.0323	7.26106e-05	140254	61106	outcome	1.05999e-32	22	43339331	0.04773	3657	BAFF-R on CD24+ CD27+ B cell	prostate cancer	6.33949e-29	0.0460506	176.44
rs187315152	T	A	T	A	-0.5139	-0.0357	0.0535	0.0157	22	41305795	0.0389	0.359	140254	61106	outcome	2.39111e-18	22	41305795	0.05851	3657	BAFF-R on CD24+ CD27+ B cell	prostate cancer	2.00935e-17	0.0267462	100.444
rs2142827	A	G	A	G	-0.3402	0.0056	0.1416	0.2342	22	42874781	0.0115	0.6265	140254	61106	outcome	4.12287e-21	22	42874781	0.03585	3657	BAFF-R on CD24+ CD27+ B cell	prostate cancer	2.2164e-20	0.0281353	105.812
rs5758649	T	C	T	C	-0.6147	0.0151	0.0871	0.0275	22	42605548	0.0261	0.5629	140254	61106	outcome	7.30802e-42	22	42605548	0.04478	3657	BAFF-R on CD24+ CD27+ B cell	prostate cancer	1.28619e-40	0.0600894	233.668
rs73165130	C	G	C	G	-1.493	0.0018	0.099	0.0803	22	42316496	0.0148	0.9043	140254	61106	outcome	1e-200	22	42316496	0.0339	3657	BAFF-R on CD24+ CD27+ B cell	prostate cancer	0	0.397658	2412.98
rs9614288	T	A	T	A	-0.3203	0.0152	0.2346	0.2413	22	44297686	0.0109	0.1634	140254	61106	outcome	9.64717e-28	22	44297686	0.0291	3657	BAFF-R on CD24+ CD27+ B cell	prostate cancer	3.55832e-26	0.0368435	139.814
rs117086217	G	A	G	A	-0.4893	-0.0397	0.0343	0.0242	22	39876838	0.0302	0.188	140254	61106	outcome	4.3401e-13	22	39876838	0.06729	3657	BAFF-R on switched memory B cell	prostate cancer	3.62833e-12	0.0158605	58.9044
rs118137006	C	A	C	A	-0.7534	0.0481	0.015	0.0135	22	40727723	0.0419	0.2509	140254	61106	outcome	7.64364e-13	22	40727723	0.1047	3657	BAFF-R on switched memory B cell	prostate cancer	5.08115e-12	0.0167729	62.3508
rs13058590	T	C	T	C	-0.3673	0.0113	0.0468	0.0176	22	39641412	0.0341	0.7405	140254	61106	outcome	6.65503e-10	22	39641412	0.05933	3657	BAFF-R on switched memory B cell	prostate cancer	1.4718e-09	0.0120365	44.5295
rs143944768	T	C	T	C	-0.3347	-0.086	0.0463	0.0134	22	44378670	0.043	0.0454695	140254	61106	outcome	1.40501e-08	22	44378670	0.05887	3657	BAFF-R on switched memory B cell	prostate cancer	1.25661e-07	0.00989314	36.5207
rs146069723	T	C	T	C	-0.5915	0.1283	0.0756	0.0153	22	43339331	0.0323	7.26106e-05	140254	61106	outcome	1.53993e-34	22	43339331	0.04776	3657	BAFF-R on switched memory B cell	prostate cancer	1.20159e-30	0.0489014	187.924
rs187315152	T	A	T	A	-0.5129	-0.0357	0.0535	0.0157	22	41305795	0.0389	0.359	140254	61106	outcome	3.09671e-18	22	41305795	0.05859	3657	BAFF-R on switched memory B cell	prostate cancer	2.56454e-17	0.0266422	100.043
rs2142827	A	G	A	G	-0.3514	0.0056	0.1416	0.2342	22	42874781	0.0115	0.6265	140254	61106	outcome	2.13304e-22	22	42874781	0.03586	3657	BAFF-R on switched memory B cell	prostate cancer	1.25714e-21	0.0300183	113.112
rs4657041	C	T	C	T	-0.1521	-0.0078	0.3344	0.5086	1	161478859	0.0082	0.3437	140254	61106	outcome	1.93201e-08	1	161478859	0.02702	3657	BAFF-R on switched memory B cell	prostate cancer	6.78003e-08	0.0102984	38.0322
rs5758649	T	C	T	C	-0.6396	0.0151	0.0871	0.0275	22	42605548	0.0261	0.5629	140254	61106	outcome	4.41062e-45	22	42605548	0.04477	3657	BAFF-R on switched memory B cell	prostate cancer	8.18525e-44	0.0650561	254.326
rs73165129	T	C	T	C	-1.466	0.0018	0.099	0.0803	22	42315371	0.0148	0.904	140254	61106	outcome	1e-200	22	42315371	0.03427	3657	BAFF-R on switched memory B cell	prostate cancer	0	0.383405	2272.72
rs9614288	T	A	T	A	-0.3092	0.0152	0.2346	0.2413	22	44297686	0.0109	0.1634	140254	61106	outcome	7.0762e-26	22	44297686	0.02917	3657	BAFF-R on switched memory B cell	prostate cancer	2.24398e-24	0.0343341	129.953
rs117430146	C	G	C	G	0.3144	0.0714	0.056	0.0133	22	41998660	0.0367	0.0515395	140254	61106	outcome	1.82701e-08	22	41998660	0.05574	3658	BAFF-R on IgD+ B cell	prostate cancer	1.5249e-07	0.0104509	38.6121
rs117705111	A	G	A	G	-0.7498	0.0291	0.0365	0.0315	22	41957510	0.0236	0.2178	140254	61106	outcome	3.47616e-30	22	41957510	0.06509	3658	BAFF-R on IgD+ B cell	prostate cancer	1.16699e-28	0.0395426	150.52
rs149806587	G	A	G	A	-0.5364	-0.0553	0.0526	0.0118	22	40774205	0.0419	0.1866	140254	61106	outcome	1.40896e-20	22	40774205	0.05734	3658	BAFF-R on IgD+ B cell	prostate cancer	2.53796e-19	0.0286765	107.937
rs1801274	G	A	G	A	-0.1694	-0.0078	0.325	0.5082	1	161479745	0.0082	0.3417	140254	61106	outcome	3.642e-10	1	161479745	0.02694	3658	BAFF-R on IgD+ B cell	prostate cancer	1.50243e-09	0.0125905	46.6179
rs1894588	T	C	T	C	-0.5248	-0.0178	0.0622	0.0361	22	40629980	0.0225	0.4298	140254	61106	outcome	1.86509e-24	22	40629980	0.05105	3658	BAFF-R on IgD+ B cell	prostate cancer	2.00091e-23	0.0321306	121.369
rs3819676	A	T	A	T	-0.4366	0.0331	0.1407	0.0797	22	43339960	0.0148	0.02516	140254	61106	outcome	3.1153e-33	22	43339960	0.03599	3658	BAFF-R on IgD+ B cell	prostate cancer	8.37728e-31	0.0460931	176.659
rs5757678	T	C	T	C	0.218	0.0007	0.6419	0.7323	22	39843409	0.0091	0.9399	140254	61106	outcome	5.51061e-17	22	39843409	0.0259	3658	BAFF-R on IgD+ B cell	prostate cancer	1.34619e-16	0.0218482	81.661
rs73165134	G	C	G	C	-1.508	0.0016	0.099	0.0806	22	42322016	0.0148	0.9141	140254	61106	outcome	1e-200	22	42322016	0.03367	3658	BAFF-R on IgD+ B cell	prostate cancer	0	0.405688	2495.66
rs76146864	T	C	T	C	-0.7095	-0.0253	0.0264	0.022	22	40246055	0.0294	0.3887	140254	61106	outcome	1.10994e-19	22	40246055	0.07772	3658	BAFF-R on IgD+ B cell	prostate cancer	9.57318e-19	0.0258773	97.1207
rs112417310	A	G	A	G	0.5373	-0.0128	0.0201	0.0109	1	206855483	0.0423	0.7623	140254	61106	outcome	1.695e-09	1	206855483	0.08896	3657	CD19 on IgD- CD38dim B cell	prostate cancer	3.55411e-09	0.0113721	42.0432
rs138920008	C	G	C	G	-1.514	-0.0132	0.0041	0.0432	16	32422808	0.0265	0.6181	140254	61106	outcome	2.63087e-12	16	32422808	0.2157	3657	CD19 on IgD- CD38dim B cell	prostate cancer	8.285e-12	0.0187189	69.7229
rs112417310	A	G	A	G	0.4952	-0.0128	0.0201	0.0109	1	206855483	0.0423	0.7623	140254	61106	outcome	3.38197e-08	1	206855483	0.0895	3657	CD19 on switched memory B cell	prostate cancer	6.4555e-08	0.00965982	35.651
rs7189927	C	T	C	T	0.167	0.0028	0.5982	0.6433	16	28913787	0.0086	0.742	140254	61106	outcome	2.9792e-11	16	28913787	0.02504	3657	CD19 on switched memory B cell	prostate cancer	7.1227e-11	0.0134066	49.6671
rs9400058	G	A	G	A	-0.8239	0.0048	0.0617	0.0748	6	107164076	0.0161	0.766699	140254	61106	outcome	3.42216e-30	6	107164076	0.07087	1832	CD24 on IgD+ CD38- unswitched memory B cell	prostate cancer	5.51631e-30	0.078597	156.102
rs9400058	G	A	G	A	-0.5307	0.0048	0.0651	0.0748	6	107164076	0.0161	0.766699	140254	61106	outcome	2.20902e-25	6	107164076	0.05059	3648	CD24 on IgD- CD38- B cell	prostate cancer	1.10949e-24	0.0342826	129.432
rs147487472	A	C	A	C	0.4239	0.0233	0.0415	0.0595	10	6191376	0.0179	0.1922	140254	61106	outcome	6.11787e-12	10	6191376	0.06144	3660	CD25 on B cell	prostate cancer	4.45584e-11	0.0142954	53.051
rs3793662	T	C	T	C	-0.1654	0.0016	0.776	0.8052	9	95886051	0.0102	0.8731	140254	61106	outcome	2.18902e-08	9	95886051	0.0295	3660	CD25 on B cell	prostate cancer	3.76739e-08	0.00951066	35.1241
rs41294937	C	T	C	T	0.4838	-0.0055	0.1077	0.0487	10	6106621	0.0185	0.767201	140254	61106	outcome	1.6761e-32	10	6106621	0.04036	3660	CD25 on B cell	prostate cancer	1.15042e-31	0.0449871	172.315
rs3793662	T	C	T	C	-0.1898	0.0016	0.7759	0.8052	9	95886051	0.0102	0.8731	140254	61106	outcome	1.11401e-10	9	95886051	0.02934	3657	CD25 on IgD+ CD24- B cell	prostate cancer	2.17658e-10	0.0125277	46.3695
rs62626323	A	C	A	C	0.5847	-0.0034	0.1075	0.0494	10	6115678	0.0184	0.8539	140254	61106	outcome	1.31795e-47	10	6115678	0.03976	3657	CD25 on IgD+ CD24- B cell	prostate cancer	1.11346e-46	0.0656014	256.607
rs709589	T	C	T	C	-0.183	0.0005	0.4557	0.4292	14	106306841	0.0123	0.9698	140254	61106	outcome	5.97806e-09	14	106306841	0.03138	3657	CD25 on IgD+ CD24- B cell	prostate cancer	9.40803e-09	0.0166131	61.7465
rs7920946	C	T	C	T	0.1584	0.0087	0.2773	0.2993	10	6074634	0.0087	0.3202	140254	61106	outcome	1.513e-08	10	6074634	0.02792	3657	CD25 on IgD+ CD24- B cell	prostate cancer	5.5551e-08	0.0100565	37.13
rs28669075	T	C	T	C	-0.1749	0.0127	0.4074	0.431	15	40856521	0.0081	0.1148	140254	61106	outcome	4.7076e-12	15	40856521	0.02521	3657	IgD on IgD+ B cell	prostate cancer	4.59942e-11	0.0147704	54.7952
rs709589	T	C	T	C	-0.5948	0.0005	0.4557	0.4292	14	106306841	0.0123	0.9698	140254	61106	outcome	5.06407e-81	14	106306841	0.03043	3657	IgD on IgD+ B cell	prostate cancer	3.23443e-80	0.175505	778.016
rs11773763	T	C	T	C	-0.1856	0.0102	0.2587	0.3289	7	50271499	0.0093	0.2738	140254	61106	outcome	7.29206e-10	7	50271499	0.03003	2872	CD62L on CD62L+ plasmacytoid Dendritic Cell	prostate cancer	2.70801e-09	0.0132122	38.4268
rs343813	T	A	T	A	-0.2089	-0.0109	0.2115	0.2471	1	111334781	0.0094	0.246	140254	61106	outcome	5.18442e-11	1	111334781	0.03169	2872	CD62L on CD62L+ plasmacytoid Dendritic Cell	prostate cancer	2.24003e-10	0.0145552	42.3905
rs3917761	T	G	T	G	-0.1658	-0.0003	0.3491	0.2992	1	169574729	0.0102	0.9779	140254	61106	outcome	4.47497e-09	1	169574729	0.02818	2872	CD62L on CD62L+ plasmacytoid Dendritic Cell	prostate cancer	6.34077e-09	0.0124929	36.3082
rs4987358	T	G	T	G	0.3259	0.0099	0.2441	0.2584	1	169665551	0.0092	0.2821	140254	61106	outcome	4.42181e-28	1	169665551	0.02935	2872	CD62L on CD62L+ plasmacytoid Dendritic Cell	prostate cancer	5.2836e-27	0.039195	117.079
rs150649461	C	G	C	G	-0.4543	0.0039	0.0428	0.0188	1	92925654	0.0344	0.9094	140254	61106	outcome	3.96004e-10	1	92925654	0.07237	2850	CD86 on monocyte	prostate cancer	6.27435e-10	0.0169107	48.9902
rs12364299	T	A	T	A	-0.2989	0.0251	0.0782	0.0249	11	5403108	0.0262	0.3378	140254	61106	outcome	3.67502e-09	11	5403108	0.05053	3112	CD45 on CD14+ monocyte	prostate cancer	1.21314e-08	0.0128803	40.5804
rs3865444	A	C	A	C	-1.214	0.0143	0.1934	0.3273	19	51727962	0.0086	0.0949992	140254	61106	outcome	7.8343e-184	19	51727962	0.03655	1577	CD33 on CD33+ HLA DR+ CD14dim	prostate cancer	6.84349e-196	0.459814	1340.66
rs58301181	G	C	G	C	-0.4272	0.0086	0.0843	0.106	19	52097261	0.0148	0.562501	140254	61106	outcome	3.28799e-10	19	52097261	0.06754	1577	CD33 on CD33+ HLA DR+ CD14dim	prostate cancer	5.63161e-10	0.0281756	45.6632
rs62114147	T	C	T	C	0.288	0.0065	0.5568	0.5259	19	51588018	0.0085	0.4432	140254	61106	outcome	1.35114e-14	19	51588018	0.03704	1577	CD33 on CD33+ HLA DR+ CD14dim	prostate cancer	2.95032e-14	0.0409368	67.2275
rs7351079	G	A	G	A	-0.326	0.0124	0.2613	0.1731	19	51574038	0.0106	0.2408	140254	61106	outcome	2.42996e-14	19	51574038	0.04234	1577	CD33 on CD33+ HLA DR+ CD14dim	prostate cancer	7.2182e-14	0.0410273	67.3825
rs117067704	G	A	G	A	0.6413	0.0008	0.0232	0.0108	17	62128083	0.047	0.9866	140254	61106	outcome	7.96526e-13	17	62128083	0.08914	2872	FSC-A on plasmacytoid Dendritic Cell	prostate cancer	1.27544e-12	0.01864	54.5129
rs144843975	T	C	T	C	0.3683	0.0342	0.0519	0.0109	17	63066415	0.0512	0.5039	140254	61106	outcome	3.33204e-09	17	63066415	0.06208	2872	FSC-A on plasmacytoid Dendritic Cell	prostate cancer	8.14787e-09	0.0133492	38.8305
rs62045817	T	C	T	C	-0.2143	-0.0005	0.1737	0.1452	16	89045233	0.0125	0.9664	140254	61106	outcome	5.274e-09	16	89045233	0.0366	2872	FSC-A on plasmacytoid Dendritic Cell	prostate cancer	7.55678e-09	0.0131829	38.3404
rs722926	T	C	T	C	0.1525	-0.0059	0.4102	0.3991	17	8677215	0.0084	0.4784	140254	61106	outcome	3.65603e-08	17	8677215	0.02762	2872	FSC-A on plasmacytoid Dendritic Cell	prostate cancer	8.52194e-08	0.011253	32.6638
rs115805162	T	C	T	C	0.2393	-0.0042	0.2099	0.0657	1	161410253	0.0172	0.8093	140254	61106	outcome	2.02815e-12	1	161410253	0.03389	2971	FSC-A on HLA DR+ Natural Killer	prostate cancer	4.15533e-12	0.0189937	57.4842
rs11891318	G	C	G	C	0.243	-0.0127	0.105	0.1253	2	130608376	0.0132	0.3344	140254	61106	outcome	4.82703e-08	2	130608376	0.0444	2971	FSC-A on HLA DR+ Natural Killer	prostate cancer	1.38304e-07	0.0110983	33.3205
rs577453	G	T	G	T	-0.1551	0.0023	0.43	0.4739	1	160797323	0.0088	0.792899	140254	61106	outcome	2.683e-08	1	160797323	0.02782	2971	FSC-A on HLA DR+ Natural Killer	prostate cancer	4.52782e-08	0.0117923	35.429
rs71632979	G	A	G	A	-0.5493	-0.0188	0.2402	0.1189	1	161526397	0.0135	0.1661	140254	61106	outcome	3.57767e-69	1	161526397	0.03044	2971	FSC-A on HLA DR+ Natural Killer	prostate cancer	2.24149e-67	0.110134	367.457
rs144126567	G	C	G	C	0.5108	-0.0143	0.1735	0.0714	1	161510516	0.017	0.4022	140254	61106	outcome	5.50554e-57	1	161510516	0.03154	3590	CX3CR1 on CD14- CD16-	prostate cancer	2.48919e-55	0.0748297	290.205
rs876036	C	T	C	T	0.1655	0.008	0.2589	0.3342	7	50307710	0.0093	0.3894	140254	61106	outcome	5.06699e-09	7	50307710	0.02824	3590	CX3CR1 on CD14- CD16-	prostate cancer	1.68961e-08	0.0105108	38.1133
rs9823718	G	C	G	C	-0.2149	-0.0036	0.1319	0.0808	3	39293757	0.0156	0.8154	140254	61106	outcome	3.24198e-09	3	39293757	0.03622	3590	CX3CR1 on CD14- CD16-	prostate cancer	6.17518e-09	0.0105759	38.3519
rs1801274	G	A	G	A	-0.41	-0.0078	0.3262	0.5082	1	161479745	0.0082	0.3417	140254	61106	outcome	4.45451e-54	1	161479745	0.02603	3590	CX3CR1 on monocyte	prostate cancer	2.33455e-52	0.0738946	286.289
rs72865957	A	G	A	G	0.2391	0.0113	0.2681	0.3336	3	39355919	0.0086	0.1875	140254	61106	outcome	6.28203e-17	3	39355919	0.02846	3590	CX3CR1 on monocyte	prostate cancer	7.61437e-16	0.0224356	82.3464
rs9823718	G	C	G	C	-0.4083	-0.0036	0.1319	0.0808	3	39293757	0.0156	0.8154	140254	61106	outcome	7.84874e-29	3	39293757	0.03633	3590	CX3CR1 on monocyte	prostate cancer	4.01472e-28	0.0381771	142.417
rs2490437	C	T	C	T	-0.145	-0.0179	0.3672	0.3701	1	161937517	0.0083	0.0314797	140254	61106	outcome	2.77402e-08	1	161937517	0.02605	3621	PDL-1 on CD14- CD16+ monocyte	prostate cancer	2.67211e-07	0.00977091	35.7099
rs71632989	G	T	G	T	-0.5526	-0.0188	0.2461	0.1189	1	161533055	0.0135	0.1648	140254	61106	outcome	3.81681e-82	1	161533055	0.02805	3621	PDL-1 on CD14- CD16+ monocyte	prostate cancer	1.23319e-79	0.113312	462.482
rs11065979	T	C	T	C	0.1497	-0.021	0.469	0.4406	12	112059557	0.0082	0.01065	140254	61106	outcome	6.46398e-09	12	112059557	0.02574	3611	CD64 on CD14+ CD16+ monocyte	prostate cancer	9.976e-08	0.011162	40.7383
rs146963227	A	G	A	G	-0.5728	0.0667	0.015	0.0088	4	17530633	0.0478	0.1626	140254	61106	outcome	1.34899e-08	4	17530633	0.1006	3611	CD64 on CD14+ CD16+ monocyte	prostate cancer	6.97407e-08	0.00969535	35.3331
rs42031	T	A	T	A	-0.1984	0.0234	0.2495	0.2105	7	92237396	0.0098	0.0169899	140254	61106	outcome	5.83996e-10	7	92237396	0.03192	2850	CCR2 on granulocyte	prostate cancer	6.5646e-09	0.0147413	42.6112
rs10919544	C	T	C	T	0.238	-0.0155	0.552	0.3253	1	161508763	0.0092	0.0929202	140254	61106	outcome	8.83894e-11	1	161508763	0.03646	1635	CD45 on CD33- HLA DR-	prostate cancer	3.39701e-10	0.0280157	47.0682
rs12614599	A	G	A	G	0.2608	-0.0029	0.3428	0.2566	2	232290640	0.0099	0.7704	140254	61106	outcome	1.67919e-12	2	232290640	0.03665	1635	CD45 on CD33- HLA DR-	prostate cancer	2.46487e-12	0.0306467	51.6283
rs17552904	T	G	T	G	-0.2523	0.0056	0.255	0.2575	7	50318308	0.0101	0.577801	140254	61106	outcome	8.7961e-10	7	50318308	0.04091	1635	CD45 on CD33- HLA DR+	prostate cancer	1.47812e-09	0.0241858	40.4744
rs33978622	C	G	C	G	0.3661	0.0134	0.2138	0.3317	19	51736383	0.0087	0.1249	140254	61106	outcome	2.89601e-17	19	51736383	0.04284	1635	CD45 on CD33- HLA DR+	prostate cancer	1.3783e-16	0.0450578	77.0512
rs147763768	A	G	A	G	0.3722	-0.0245	0.0434	0.0481	10	97548303	0.019	0.1963	140254	61106	outcome	4.86295e-08	10	97548303	0.06802	2650	CD4 on CD39+ resting CD4 regulatory T cell	prostate cancer	1.65595e-07	0.0115028	30.8138
rs11615628	A	G	A	G	-0.2046	0.0124	0.2466	0.2929	12	6903631	0.0096	0.1981	140254	61106	outcome	9.9977e-11	12	6903631	0.03153	2920	CD4 on secreting CD4 regulatory T cell	prostate cancer	4.91499e-10	0.0155546	46.1056
rs142456232	T	C	T	C	-0.3341	0.0191	0.0573	0.0214	11	4960640	0.0288	0.5055	140254	61106	outcome	1.81401e-08	11	4960640	0.05919	2872	SSC-A on plasmacytoid Dendritic Cell	prostate cancer	4.19318e-08	0.012059	35.0318
rs17552904	T	G	T	G	-0.1851	0.0056	0.245	0.2575	7	50318308	0.0101	0.577801	140254	61106	outcome	1.19501e-08	7	50318308	0.03237	2872	SSC-A on plasmacytoid Dendritic Cell	prostate cancer	2.54049e-08	0.0126752	36.8449
rs722926	T	C	T	C	0.1642	-0.0059	0.4102	0.3991	17	8677215	0.0084	0.4784	140254	61106	outcome	3.48602e-09	17	8677215	0.02772	2872	SSC-A on plasmacytoid Dendritic Cell	prostate cancer	8.8455e-09	0.013046	37.9369
rs78736654	G	T	G	T	-0.4036	-0.0319	0.0378	0.0132	11	5544477	0.0385	0.4078	140254	61106	outcome	4.40595e-08	11	5544477	0.07353	2872	SSC-A on plasmacytoid Dendritic Cell	prostate cancer	1.12117e-07	0.0118492	34.415
rs115805162	T	C	T	C	0.2464	-0.0042	0.2099	0.0657	1	161410253	0.0172	0.8093	140254	61106	outcome	2.85299e-13	1	161410253	0.03359	2971	SSC-A on HLA DR+ Natural Killer	prostate cancer	5.97776e-13	0.0201375	61.017
rs569911	C	T	C	T	-0.1723	0.0039	0.4305	0.4761	1	160798209	0.0088	0.655101	140254	61106	outcome	4.62402e-10	1	160798209	0.02756	2971	SSC-A on HLA DR+ Natural Killer	prostate cancer	1.00658e-09	0.0145569	43.8577
rs71632979	G	A	G	A	-0.5652	-0.0188	0.2402	0.1189	1	161526397	0.0135	0.1661	140254	61106	outcome	1.97879e-74	1	161526397	0.0301	2971	SSC-A on HLA DR+ Natural Killer	prostate cancer	1.15649e-72	0.116602	391.887
rs61141933	T	C	T	C	0.2582	0.006	0.1242	0.0974	2	39388479	0.015	0.6895	140254	61106	outcome	5.38902e-10	2	39388479	0.04145	2911	CD45RA on Terminally Differentiated CD8+ T cell	prostate cancer	1.10187e-09	0.0145034	42.8112
rs2792563	A	G	A	G	-0.1407	-0.0059	0.567	0.5486	1	213100225	0.0083	0.479001	140254	61106	outcome	3657	0.02479	213100225	1	1.494e-08	IgD- CD38+ B cell %B cell	prostate cancer	4.23119e-08	0.00972051	35.8772
rs4785074	T	C	T	C	-0.1403	0.0048	0.6349	0.719	16	59885737	0.0096	0.6151	140254	61106	outcome	3657	0.02562	59885737	16	4.61998e-08	Plasma Blast-Plasma Cell %lymphocyte	prostate cancer	1.0466e-07	0.00912562	33.6613
rs55971447	T	C	T	C	-0.1809	-0.0202	0.231	0.1176	1	161515326	0.0134	0.1325	140254	61106	outcome	3017	0.03084	161515326	1	4.94698e-09	CD11c+ CD62L- monocyte Absolute Count	prostate cancer	2.50191e-08	0.0116264	35.466
rs113435341	G	A	G	A	-1.414	-0.0424	0.0032	0.0194	1	198151688	0.0318	0.1815	140254	61106	outcome	3405	0.2277	198151688	1	5.87801e-10	Activated CD4 regulatory T cell Absolute Count	prostate cancer	3.25212e-09	0.0127552	43.9667
rs138915779	A	C	A	C	-1.288	0.0528	0.0034	0.0162	1	190079170	0.035	0.1315	140254	61106	outcome	3405	0.2345	190079170	1	4.23204e-08	Activated CD4 regulatory T cell Absolute Count	prostate cancer	2.14657e-07	0.0112425	38.6931
rs113435341	G	A	G	A	-2.54	-0.0424	0.0032	0.0194	1	198151688	0.0318	0.1815	140254	61106	outcome	3437	0.2093	198151688	1	3.13834e-33	Secreting CD4 regulatory T cell %CD4 regulatory T cell	prostate cancer	1.3069e-31	0.0411581	147.447
rs11579717	A	G	A	G	-1.776	0.011	0.0044	0.0434	1	199999121	0.0222	0.62	140254	61106	outcome	3437	0.1774	199999121	1	2.93022e-23	Secreting CD4 regulatory T cell %CD4 regulatory T cell	prostate cancer	1.58475e-22	0.0276346	97.6227
rs116794175	C	T	C	T	-1.417	-0.0242	0.0042	0.0063	1	194010208	0.0618	0.696	140254	61106	outcome	3437	0.1841	194010208	1	1.78115e-14	Secreting CD4 regulatory T cell %CD4 regulatory T cell	prostate cancer	5.4342e-14	0.0167954	58.6778
rs17607399	T	C	T	C	-0.2213	-0.0008	0.1084	0.0757	2	41884212	0.0156	0.9596	140254	61106	outcome	3437	0.03894	41884212	2	1.43599e-08	Secreting CD4 regulatory T cell %CD4 regulatory T cell	prostate cancer	2.17748e-08	0.00946656	32.8284
rs6751481	C	T	C	T	-0.2879	-0.0051	0.4709	0.5181	2	38897810	0.0083	0.5413	140254	61106	outcome	3437	0.02374	38897810	2	3.53021e-33	Secreting CD4 regulatory T cell %CD4 regulatory T cell	prostate cancer	3.86601e-32	0.0413028	147.988
rs113435341	G	A	G	A	2.569	-0.0424	0.0032	0.0194	1	198151688	0.0318	0.1815	140254	61106	outcome	3437	0.2103	198151688	1	1.27909e-33	Activated & resting CD4 regulatory T cell %CD4 regulatory T cell	prostate cancer	5.22486e-32	0.0421033	150.982
rs11579717	A	G	A	G	1.815	0.011	0.0044	0.0434	1	199999121	0.0222	0.62	140254	61106	outcome	3437	0.1783	199999121	1	5.32721e-24	Activated & resting CD4 regulatory T cell %CD4 regulatory T cell	prostate cancer	3.10902e-23	0.0288616	102.086
rs116794175	C	T	C	T	1.427	-0.0242	0.0042	0.0063	1	194010208	0.0618	0.696	140254	61106	outcome	3437	0.1851	194010208	1	1.61696e-14	Activated & resting CD4 regulatory T cell %CD4 regulatory T cell	prostate cancer	4.95015e-14	0.0170333	59.5233
rs17607399	T	C	T	C	0.218	-0.0008	0.1084	0.0757	2	41884212	0.0156	0.9596	140254	61106	outcome	3437	0.03915	41884212	2	2.76599e-08	Activated & resting CD4 regulatory T cell %CD4 regulatory T cell	prostate cancer	4.14842e-08	0.00918634	31.8476
rs6751481	C	T	C	T	0.2886	-0.0051	0.4709	0.5181	2	38897810	0.0083	0.5413	140254	61106	outcome	3437	0.02387	38897810	2	5.48656e-33	Activated & resting CD4 regulatory T cell %CD4 regulatory T cell	prostate cancer	5.89309e-32	0.0415039	148.739
rs113435341	G	A	G	A	-2.621	-0.0424	0.0032	0.0194	1	198151688	0.0318	0.1815	140254	61106	outcome	3437	0.1957	198151688	1	6.32995e-40	Activated & secreting CD4 regulatory T cell %CD4 regulatory T cell	prostate cancer	3.88334e-38	0.043825	157.439
rs11579717	A	G	A	G	-1.821	0.011	0.0044	0.0434	1	199999121	0.0222	0.62	140254	61106	outcome	3437	0.1663	199999121	1	1.86896e-27	Activated & secreting CD4 regulatory T cell %CD4 regulatory T cell	prostate cancer	1.2859e-26	0.0290528	102.782
rs138915779	A	C	A	C	-1.784	0.0528	0.0035	0.0162	1	190079170	0.035	0.1315	140254	61106	outcome	3437	0.2042	190079170	1	3.69828e-18	Activated & secreting CD4 regulatory T cell %CD4 regulatory T cell	prostate cancer	5.99194e-17	0.0222006	77.9906
rs17607399	T	C	T	C	-0.2077	-0.0008	0.1084	0.0757	2	41884212	0.0156	0.9596	140254	61106	outcome	3437	0.03673	41884212	2	1.7e-08	Activated & secreting CD4 regulatory T cell %CD4 regulatory T cell	prostate cancer	2.55582e-08	0.00833878	28.8846
rs187089343	C	A	C	A	-0.9956	-0.0371	0.0047	0.0075	1	182091538	0.0609	0.5426	140254	61106	outcome	3437	0.1693	182091538	1	4.52397e-09	Activated & secreting CD4 regulatory T cell %CD4 regulatory T cell	prostate cancer	1.16165e-08	0.00927367	32.1532
rs6751481	C	T	C	T	-0.2903	-0.0051	0.4709	0.5181	2	38897810	0.0083	0.5413	140254	61106	outcome	3437	0.02227	38897810	2	6.28782e-38	Activated & secreting CD4 regulatory T cell %CD4 regulatory T cell	prostate cancer	7.82799e-37	0.0419943	150.574
rs7530076	A	G	A	G	0.4611	-0.0022	0.9748	0.9731	1	195825276	0.0309	0.9437	140254	61106	outcome	3437	0.07373	195825276	1	4.49904e-10	Activated & secreting CD4 regulatory T cell %CD4 regulatory T cell	prostate cancer	7.50089e-10	0.0104457	36.2596
rs3184504	C	T	C	T	-0.1609	0.0187	0.5292	0.5189	12	111884608	0.0082	0.0218102	140254	61106	outcome	3395	0.02705	111884608	12	2.98497e-09	Central Memory CD4+ T cell Absolute Count	prostate cancer	3.46556e-08	0.0129003	44.3426
rs146620586	T	G	T	G	1.455	-0.0372	0.0032	0.0173	1	198524264	0.0373	0.3183	140254	61106	outcome	3427	0.2533	198524264	1	1.003e-08	CD45RA+ CD8+ T cell %T cell	prostate cancer	3.55875e-08	0.0135056	46.89
rs6707421	G	A	G	A	0.1592	-0.0165	0.3011	0.1677	2	38897781	0.0115	0.1514	140254	61106	outcome	3427	0.02442	38897781	2	8.10588e-11	CD45RA+ CD8+ T cell %T cell	prostate cancer	5.45519e-10	0.010667	36.9284
rs3087456	A	G	A	G	-0.4689	0.0012	0.7661	0.7348	16	10970902	0.0096	0.897	140254	61106	outcome	3596	0.02616	10970902	16	7.09088e-69	HLA DR+ T cell%lymphocyte	prostate cancer	5.49825e-68	0.0787964	307.417
rs55724950	A	G	A	G	-0.2598	0.0465	0.0654	0.0291	16	10993712	0.0326	0.1539	140254	61106	outcome	3596	0.0468	10993712	16	3.046e-08	HLA DR+ T cell%lymphocyte	prostate cancer	1.54164e-07	0.0082511	29.9012
rs62029480	T	C	T	C	0.4397	-0.0235	0.0236	0.0213	16	10651993	0.0348	0.4997	140254	61106	outcome	3596	0.07676	10651993	16	1.096e-08	HLA DR+ T cell%lymphocyte	prostate cancer	3.02184e-08	0.0089101	32.3108
rs68174286	T	C	T	C	0.2699	0.0002	0.2799	0.4495	6	32503204	0.0087	0.9817	140254	61106	outcome	3596	0.04426	32503204	6	1.185e-09	HLA DR+ T cell%lymphocyte	prostate cancer	1.89442e-09	0.0293651	108.731
rs7032773	T	C	T	C	-0.1552	-0.0055	0.4182	0.4486	9	117645562	0.0082	0.5029	140254	61106	outcome	3596	0.0249	117645562	9	5.14505e-10	HLA DR+ T cell%lymphocyte	prostate cancer	1.57298e-09	0.0117212	42.6255
rs3087456	A	G	A	G	-0.4525	0.0012	0.7662	0.7348	16	10970902	0.0096	0.897	140254	61106	outcome	3595	0.027	10970902	16	9.22784e-61	HLA DR+ CD8+ T cell %lymphocyte	prostate cancer	7.31473e-60	0.0733591	284.446
rs72779785	G	A	G	A	-0.1929	-0.0075	0.1634	0.0433	16	10569039	0.0252	0.766099	140254	61106	outcome	3595	0.03221	10569039	16	2.311e-09	HLA DR+ CD8+ T cell %lymphocyte	prostate cancer	4.74353e-09	0.0101734	36.9286
rs9378213	G	T	G	T	0.2165	0.0021	0.3057	0.4069	6	32448398	0.0082	0.7955	140254	61106	outcome	3595	0.03031	32448398	6	1.10892e-12	HLA DR+ CD8+ T cell %lymphocyte	prostate cancer	2.6512e-12	0.019897	72.9414
rs115536607	T	C	T	C	0.3576	0.0275	0.0545	0.0411	6	101417409	0.02	0.1682	140254	61106	outcome	3668	0.05416	101417409	6	4.63554e-11	CD4-CD8- Natural Killer T %lymphocyte	prostate cancer	3.28099e-10	0.013179	48.9595
rs117147408	G	A	G	A	0.675	0.0222	0.0275	0.0233	6	101980039	0.0304	0.465799	140254	61106	outcome	3668	0.07557	101980039	6	6.50429e-19	CD4-CD8- Natural Killer T %lymphocyte	prostate cancer	4.38848e-18	0.0243702	91.573
rs34613828	T	A	T	A	0.2167	-0.0031	0.1945	0.2409	2	87022759	0.0104	0.7614	140254	61106	outcome	3668	0.03095	87022759	2	3.04229e-12	CD4-CD8- Natural Killer T %lymphocyte	prostate cancer	7.48543e-12	0.0147141	54.7474
rs77738700	A	G	A	G	-0.3774	-0.0034	0.1067	0.0318	11	112751407	0.0261	0.8964	140254	61106	outcome	3668	0.03905	112751407	11	7.84513e-22	CD4-CD8- Natural Killer T %lymphocyte	prostate cancer	2.57867e-21	0.0271516	102.316
rs79251210	A	G	A	G	0.5505	-0.0303	0.0378	0.0346	6	100468602	0.0231	0.19	140254	61106	outcome	3668	0.06465	100468602	6	2.39276e-17	CD4-CD8- Natural Killer T %lymphocyte	prostate cancer	3.13465e-16	0.0220446	82.6371
rs9488834	A	G	A	G	0.3698	-0.0002	0.0465	0.0192	6	97889936	0.031	0.9954	140254	61106	outcome	3668	0.05821	97889936	6	2.386e-10	CD4-CD8- Natural Killer T %lymphocyte	prostate cancer	3.89663e-10	0.0121266	45.0017
rs9916629	C	T	C	T	0.1378	-0.0029	0.5123	0.317	17	33796260	0.0089	0.7424	140254	61106	outcome	3668	0.02431	33796260	17	1.54e-08	CD4-CD8- Natural Killer T %lymphocyte	prostate cancer	3.11399e-08	0.00948867	35.1187
rs6710361	A	G	A	G	0.1921	-0.0048	0.1991	0.2466	2	87047145	0.0104	0.639699	140254	61106	outcome	3408	0.03166	87047145	2	1.44601e-09	CD28- CD4-CD8- T cell Absolute Count	prostate cancer	3.3681e-09	0.0117689	40.5621
rs9896155	G	A	G	A	0.1857	-0.0193	0.6743	0.4597	17	33794697	0.0085	0.02243	140254	61106	outcome	3408	0.02686	33794697	17	5.64417e-12	CD28- CD4-CD8- T cell Absolute Count	prostate cancer	1.01463e-10	0.0151469	52.3839
rs72915529	A	G	A	G	-0.7447	0.016	0.0103	0.0514	2	54970478	0.019	0.398	140254	61106	outcome	3162	0.1252	54970478	2	3.00497e-09	CD25++ CD8+ T cell %CD8+ T cell	prostate cancer	9.17182e-09	0.0113066	36.1376
rs112405902	A	G	A	G	0.2604	-0.0022	0.1069	0.0281	6	31809504	0.0243	0.9268	140254	61106	outcome	3657	0.0461	31809504	6	1.74699e-08	CD20 on unswitched memory B cell	prostate cancer	2.80575e-08	0.0129476	47.9443
rs4447195	T	C	T	C	-0.2525	-0.0115	0.0982	0.0788	11	60249734	0.0152	0.4495	140254	61106	outcome	3657	0.04163	60249734	11	1.45301e-09	CD20 on unswitched memory B cell	prostate cancer	4.72833e-09	0.0112921	41.744
rs6459417	T	C	T	C	0.2282	-0.0203	0.8737	0.9038	6	15858996	0.0142	0.1536	140254	61106	outcome	3657	0.03694	15858996	6	7.24803e-10	CD20 on unswitched memory B cell	prostate cancer	4.64386e-09	0.0114928	42.4947
rs6509428	T	C	T	C	-0.2404	0.0077	0.2323	0.2499	19	49853881	0.0093	0.4068	140254	61106	outcome	3657	0.02912	49853881	19	2.09218e-16	CD20 on unswitched memory B cell	prostate cancer	1.32931e-15	0.0206129	76.9259
rs12206866	T	C	T	C	-0.4459	-0.0039	0.0559	0.0519	6	107159822	0.0191	0.8388	140254	61106	outcome	3656	0.05365	107159822	6	1.31613e-16	CD24 on transitional B cell	prostate cancer	3.76717e-16	0.0209862	78.3275
rs1883832	C	T	C	T	0.2306	-0.001	0.6316	0.743	20	44746982	0.0093	0.9127	140254	61106	outcome	3651	0.02558	44746982	20	3.11172e-19	CD25 on IgD- CD27- B cell	prostate cancer	8.84577e-19	0.0247463	92.5905
rs41295093	A	G	A	G	0.3186	-0.0061	0.1067	0.0494	10	6120173	0.0184	0.738401	140254	61106	outcome	3651	0.0403	6120173	10	3.50429e-15	CD25 on IgD- CD27- B cell	prostate cancer	1.08486e-14	0.0193501	72.0018
rs11598494	C	T	C	T	-0.1768	0.0001	0.5587	0.3454	10	6178941	0.0084	0.9911	140254	61106	outcome	3657	0.02448	6178941	10	6.08555e-13	CD25 on memory B cell	prostate cancer	1.15859e-12	0.0154137	57.2191
rs1887027	T	C	T	C	-0.4203	-0.0117	0.2454	0.2132	10	6113782	0.0099	0.2342	140254	61106	outcome	3657	0.02736	6113782	10	1.16305e-51	CD25 on memory B cell	prostate cancer	1.14507e-49	0.0654245	255.866
rs3793662	T	C	T	C	-0.1626	0.0016	0.7759	0.8052	9	95886051	0.0102	0.8731	140254	61106	outcome	3657	0.02894	95886051	9	2.04899e-08	CD25 on memory B cell	prostate cancer	3.52721e-08	0.0091943	33.917
rs4747882	T	A	T	A	-0.2133	0.0175	0.7132	0.7695	10	6162476	0.0095	0.0656901	140254	61106	outcome	3657	0.02697	6162476	10	3.34734e-15	CD25 on memory B cell	prostate cancer	6.83326e-14	0.0186124	69.3185
rs144642376	G	A	G	A	0.2781	-0.014	0.0718	0.0233	3	36349691	0.0308	0.6506	140254	61106	outcome	3657	0.0492	36349691	3	1.692e-08	CD27 on switched memory B cell	prostate cancer	3.82116e-08	0.0103086	38.0702
rs162076	A	G	A	G	-0.1635	-0.0009	0.555	0.5833	20	46785499	0.0084	0.9143	140254	61106	outcome	3657	0.02512	46785499	20	8.51726e-11	CD27 on switched memory B cell	prostate cancer	1.60239e-10	0.0132044	48.9079
rs1801274	G	A	G	A	-0.2933	-0.0078	0.325	0.5082	1	161479745	0.0082	0.3417	140254	61106	outcome	3657	0.02635	161479745	1	2.48313e-28	CD27 on switched memory B cell	prostate cancer	4.54338e-27	0.0377434	143.363
rs1883832	C	T	C	T	-0.5853	-0.001	0.6318	0.743	20	44746982	0.0093	0.9127	140254	61106	outcome	3657	0.02439	44746982	20	2.5293e-118	CD27 on switched memory B cell	prostate cancer	5.99089e-118	0.159386	693.013
rs25680	A	G	A	G	-0.3147	-0.0109	0.1671	0.2186	12	6554628	0.0108	0.3134	140254	61106	outcome	3657	0.03313	6554628	12	3.75837e-21	CD27 on switched memory B cell	prostate cancer	4.41997e-20	0.0275672	103.615
rs35574803	C	T	C	T	0.6995	0.0389	0.0562	0.0222	3	32533246	0.0298	0.192	140254	61106	outcome	3657	0.05313	32533246	3	1.02e-38	CD27 on switched memory B cell	prostate cancer	6.96136e-37	0.0519065	200.105
rs6011967	C	T	C	T	0.2385	0	0.118	0.0673	20	45095161	0.0173	0.9982	140254	61106	outcome	3657	0.03937	45095161	20	1.52202e-09	CD27 on switched memory B cell	prostate cancer	2.37651e-09	0.0118402	43.7943
rs75918255	A	G	A	G	0.478	-0.0097	0.035	0.0232	3	32945761	0.0332	0.769501	140254	61106	outcome	3657	0.06777	32945761	3	2.09218e-12	CD27 on switched memory B cell	prostate cancer	5.20251e-12	0.0154341	57.2959
rs548316	A	G	A	G	-0.1994	0.0071	0.5251	0.312	11	128077683	0.0091	0.4324	140254	61106	outcome	1834	0.03417	128077683	11	6.38396e-09	CD38 on CD3- CD19-	prostate cancer	1.27156e-08	0.0198301	37.0637
rs115062208	G	A	G	A	-0.6992	0.0139	0.0115	0.0202	4	15956227	0.0312	0.6557	140254	61106	outcome	3656	0.1209	15956227	4	7.96508e-09	CD38 on IgD+ CD24- B cell	prostate cancer	1.81279e-08	0.0111149	41.0705
rs76112278	A	G	A	G	-0.7826	0.0179	0.0194	0.0119	4	15915069	0.0432	0.6784	140254	61106	outcome	3656	0.08987	15915069	4	4.57931e-18	CD38 on IgD+ CD24- B cell	prostate cancer	1.89191e-17	0.0233025	87.179
rs186090691	A	C	A	C	-0.7905	-0.0429	0.0097	0.0283	4	8970919	0.0347	0.2155	140254	61106	outcome	3652	0.1388	8970919	4	1.33999e-08	CD38 on IgD+ CD38+ B cell	prostate cancer	6.07305e-08	0.0120053	44.3517
rs76112278	A	G	A	G	-0.7731	0.0179	0.0194	0.0119	4	15915069	0.0432	0.6784	140254	61106	outcome	3652	0.089	15915069	4	5.54243e-18	CD38 on IgD+ CD38+ B cell	prostate cancer	2.26659e-17	0.0227402	84.9333
rs807784	T	G	T	G	0.3174	0.0067	0.9403	0.9463	4	13906853	0.0182	0.7137	140254	61106	outcome	3652	0.05158	13906853	4	8.41608e-10	CD38 on IgD+ CD38+ B cell	prostate cancer	1.91192e-09	0.0113106	41.7559
rs115062208	G	A	G	A	-0.8942	0.0139	0.0115	0.0202	4	15956227	0.0312	0.6557	140254	61106	outcome	3657	0.1174	15956227	4	3.33887e-14	CD38 on IgD- CD38dim B cell	prostate cancer	1.10582e-13	0.0181792	67.6751
rs76112278	A	G	A	G	-0.9249	0.0179	0.0194	0.0119	4	15915069	0.0432	0.6784	140254	61106	outcome	3657	0.08708	15915069	4	5.61436e-26	CD38 on IgD- CD38dim B cell	prostate cancer	3.58141e-25	0.0325472	122.962
rs76354299	A	G	A	G	-0.4635	0.0242	0.0321	0.0353	4	15037408	0.0234	0.301	140254	61106	outcome	3657	0.06776	15037408	4	9.22359e-12	CD38 on IgD- CD38dim B cell	prostate cancer	4.93532e-11	0.0133495	49.4526
rs115062208	G	A	G	A	-0.912	0.0139	0.0115	0.0202	4	15956227	0.0312	0.6557	140254	61106	outcome	3657	0.1184	15956227	4	1.68694e-14	CD38 on transitional B cell	prostate cancer	5.83074e-14	0.0189101	70.4487
rs149852991	T	G	T	G	-0.5334	0.0255	0.0321	0.035	4	15044338	0.0235	0.2773	140254	61106	outcome	3657	0.06859	15044338	4	9.69393e-15	CD38 on transitional B cell	prostate cancer	7.30295e-14	0.0176796	65.7818
rs197429	T	C	T	C	0.1669	0.0085	0.233	0.2522	1	112267500	0.0096	0.3731	140254	61106	outcome	3657	0.02931	112267500	1	1.34701e-08	CD38 on transitional B cell	prostate cancer	4.46474e-08	0.00995621	36.7559
rs572542	T	C	T	C	-0.4513	-0.0008	0.0288	0.0229	4	14029370	0.0274	0.9767	140254	61106	outcome	3657	0.07246	14029370	4	5.23504e-10	CD38 on transitional B cell	prostate cancer	8.6582e-10	0.0113936	42.1236
rs76112278	A	G	A	G	-1.046	0.0179	0.0194	0.0119	4	15915069	0.0432	0.6784	140254	61106	outcome	3657	0.08813	15915069	4	6.27047e-32	CD38 on transitional B cell	prostate cancer	5.48075e-31	0.0416281	158.76
rs112421400	T	C	T	C	-0.1982	-0.0109	0.2101	0.0504	6	28205826	0.0182	0.5494	140254	61106	outcome	3656	0.03505	28205826	6	1.695e-08	IgD on IgD+ CD24+ B cell	prostate cancer	4.29551e-08	0.0130387	48.273
rs139084170	A	C	A	C	0.3593	0.1035	0.052	0.014	6	43351686	0.0363	0.00439198	140254	61106	outcome	3656	0.05776	43351686	6	5.50503e-10	IgD on IgD+ CD24+ B cell	prostate cancer	1.38521e-08	0.0127279	47.1073
rs2819455	C	G	C	G	0.2689	0.0089	0.0952	0.1538	14	105445412	0.0126	0.4794	140254	61106	outcome	3656	0.04177	105445412	14	1.38201e-10	IgD on IgD+ CD24+ B cell	prostate cancer	4.66318e-10	0.0124566	46.0907
rs709589	T	C	T	C	-0.6123	0.0005	0.4558	0.4292	14	106306841	0.0123	0.9698	140254	61106	outcome	3656	0.03013	106306841	14	4.42486e-87	IgD on IgD+ CD24+ B cell	prostate cancer	2.46231e-86	0.185991	834.893
rs9265515	C	T	C	T	-0.221	-0.0144	0.3368	0.1234	6	31297744	0.0123	0.242	140254	61106	outcome	3656	0.03249	31297744	6	1.20088e-11	IgD on IgD+ CD24+ B cell	prostate cancer	7.33384e-11	0.0218188	81.5043
rs5996087	G	A	G	A	-0.4215	0.0058	0.0998	0.082	22	42321591	0.0147	0.6925	140254	61106	outcome	3648	0.0399	42321591	22	1.02896e-25	BAFF-R on CD20- B cell	prostate cancer	6.18364e-25	0.0319223	120.227
rs111780443	T	C	T	C	-0.3659	0.0818	0.045	0.0141	11	132210362	0.0373	0.0285799	140254	61106	outcome	2910	0.06602	132210362	11	3.25402e-08	CD3 on naive CD8+ T cell	prostate cancer	2.43487e-07	0.0115072	33.8526
rs12142987	T	C	T	C	-0.1969	-0.0208	0.2113	0.312	1	167711470	0.0091	0.0218902	140254	61106	outcome	2910	0.03331	167711470	1	3.80601e-09	CD3 on naive CD8+ T cell	prostate cancer	3.53884e-08	0.0129221	38.0694
rs12921174	C	T	C	T	-0.1937	0.0054	0.2041	0.4377	16	430304	0.0085	0.5242	140254	61106	outcome	2910	0.03404	430304	16	1.39701e-08	CD3 on naive CD8+ T cell	prostate cancer	3.19507e-08	0.0121896	35.8849
rs2949661	T	C	T	C	0.6171	0.0114	0.446	0.3684	1	167424924	0.0085	0.1775	140254	61106	outcome	2910	0.02536	167424924	1	3.53997e-119	CD3 on naive CD8+ T cell	prostate cancer	1.84676e-118	0.188185	674.098
rs4657649	C	T	C	T	0.4823	-0.0198	0.051	0.0937	1	167173140	0.0156	0.2049	140254	61106	outcome	2910	0.06189	167173140	1	9.11381e-15	CD3 on naive CD8+ T cell	prostate cancer	6.16413e-14	0.0225165	66.9863
rs61814886	A	G	A	G	0.3184	-0.0067	0.106	0.1187	1	167136405	0.0126	0.5961	140254	61106	outcome	2910	0.04432	167136405	1	8.58025e-13	CD3 on naive CD8+ T cell	prostate cancer	2.33362e-12	0.0192141	56.9691
rs2949661	T	C	T	C	0.521	0.0114	0.4462	0.3684	1	167424924	0.0085	0.1775	140254	61106	outcome	2911	0.02584	167424924	1	1.04809e-84	CD3 on CD45RA- CD4+ T cell	prostate cancer	3.34904e-83	0.134149	450.701
rs4657649	C	T	C	T	0.4147	-0.0198	0.051	0.0937	1	167173140	0.0156	0.2049	140254	61106	outcome	2911	0.06162	167173140	1	2.0488e-11	CD3 on CD45RA- CD4+ T cell	prostate cancer	1.03293e-10	0.0166469	49.2457
rs61814886	A	G	A	G	0.2793	-0.0067	0.1061	0.1187	1	167136405	0.0126	0.5961	140254	61106	outcome	2911	0.04405	167136405	1	2.65797e-10	CD3 on CD45RA- CD4+ T cell	prostate cancer	6.22738e-10	0.0147971	43.6912
rs3116493	T	G	T	G	0.303	0.0024	0.5639	0.75	2	204589281	0.0095	0.8	140254	61106	outcome	2920	0.02642	204589281	2	8.43529e-30	CD28 on CD39+ activated CD4 regulatory T cell	prostate cancer	2.91906e-29	0.0451547	137.993
rs77594357	A	T	A	T	-0.1636	-0.0036	0.2743	0.1843	2	204328474	0.0107	0.736	140254	61106	outcome	2920	0.02972	204328474	2	3.97704e-08	CD28 on CD39+ activated CD4 regulatory T cell	prostate cancer	7.04572e-08	0.0106556	31.428
rs2517515	T	C	T	C	-0.1602	0.0013	0.4243	0.1783	6	31029258	0.0104	0.8975	140254	61106	outcome	3112	0.02905	31029258	6	3.743e-08	CD45 on B cell	prostate cancer	5.75113e-08	0.0125379	39.4879
rs5750829	G	A	G	A	-0.1537	0.0009	0.5967	0.7227	22	39838018	0.009	0.9202	140254	61106	outcome	3112	0.02608	39838018	22	4.142e-09	CD45 on B cell	prostate cancer	6.52582e-09	0.01137	35.7675
rs12722600	T	C	T	C	0.3212	-0.0134	0.0705	0.0197	10	6054765	0.0293	0.649	140254	61106	outcome	3434	0.04962	6054765	10	1.09199e-10	CD25 on resting CD4 regulatory T cell	prostate cancer	2.77421e-10	0.0135213	47.0413
rs113116201	C	T	C	T	1.214	-0.0285	0.0044	0.0169	1	198830942	0.0323	0.3784	140254	61106	outcome	3435	0.1863	198830942	1	8.42752e-11	CD25 on secreting CD4 regulatory T cell	prostate cancer	3.22465e-10	0.0129123	44.9079
rs11882720	G	T	G	T	-0.4484	0.0127	0.0726	0.1402	19	52897142	0.0148	0.3903	140254	61106	outcome	1633	0.06841	52897142	19	7.42506e-11	CD33 on CD33dim HLA DR+ CD11b+	prostate cancer	1.60972e-10	0.0270748	45.3878
rs1801274	G	A	G	A	-0.2575	-0.0078	0.3298	0.5082	1	161479745	0.0082	0.3417	140254	61106	outcome	1633	0.0387	161479745	1	3.92464e-11	CD33 on CD33dim HLA DR+ CD11b+	prostate cancer	9.05914e-11	0.0293116	49.2508
rs3865444	A	C	A	C	-1.139	0.0143	0.2122	0.3273	19	51727962	0.0086	0.0949992	140254	61106	outcome	1633	0.03358	51727962	19	2.38232e-191	CD33 on CD33dim HLA DR+ CD11b+	prostate cancer	6.62904e-204	0.433749	1249.35
rs4801891	C	T	C	T	-0.2225	-0.0158	0.5628	0.552	19	52254351	0.0083	0.0577803	140254	61106	outcome	1633	0.03595	52254351	19	7.66196e-10	CD33 on CD33dim HLA DR+ CD11b+	prostate cancer	3.1469e-09	0.0243626	40.7277
rs58483275	T	C	T	C	0.4941	-0.0653	0.0704	0.0111	19	51868443	0.0475	0.1696	140254	61106	outcome	1633	0.07133	51868443	19	6.18159e-12	CD33 on CD33dim HLA DR+ CD11b+	prostate cancer	2.0241e-11	0.0319542	53.8377
rs62114147	T	C	T	C	0.2936	0.0065	0.5508	0.5259	19	51588018	0.0085	0.4432	140254	61106	outcome	1633	0.03571	51588018	19	4.03738e-16	CD33 on CD33dim HLA DR+ CD11b+	prostate cancer	9.39377e-16	0.0426556	72.6711
rs7351079	G	A	G	A	-0.3895	0.0124	0.271	0.1731	19	51574038	0.0106	0.2408	140254	61106	outcome	1633	0.04	51574038	19	8.18465e-22	CD33 on CD33dim HLA DR+ CD11b+	prostate cancer	3.03135e-21	0.0599435	104.002
rs12459503	C	T	C	T	0.2704	0.0101	0.7148	0.625	19	52161035	0.0086	0.2426	140254	61106	outcome	1464	0.04205	52161035	19	1.736e-10	CD33 on CD66b++ myeloid cell	prostate cancer	4.21086e-10	0.0298111	44.923
rs3865444	A	C	A	C	-0.9497	0.0143	0.2094	0.3273	19	51727962	0.0086	0.0949992	140254	61106	outcome	1464	0.0394	51727962	19	2.38781e-108	CD33 on CD66b++ myeloid cell	prostate cancer	1.41291e-111	0.298632	622.498
rs7351079	G	A	G	A	-0.3103	0.0124	0.2702	0.1731	19	51574038	0.0106	0.2408	140254	61106	outcome	1464	0.04316	51574038	19	1.04304e-12	CD33 on CD66b++ myeloid cell	prostate cancer	2.7553e-12	0.0379737	57.7089
rs78949787	T	C	T	C	0.2681	0.0066	0.5574	0.5297	19	51591138	0.0088	0.4514	140254	61106	outcome	1464	0.03799	51591138	19	2.61879e-12	CD33 on CD66b++ myeloid cell	prostate cancer	5.09705e-12	0.0354652	53.7566
rs61839660	T	C	T	C	0.386	-0.0205	0.0575	0.0865	10	6094697	0.0143	0.1509	140254	61106	outcome	2920	0.0569	6094697	10	1.41808e-11	CD25 on CD4+ T cell	prostate cancer	8.52299e-11	0.0161493	47.8972
rs35587265	G	A	G	A	-0.4732	0.0065	0.0624	0.0877	3	46259296	0.0145	0.6546	140254	61106	outcome	2870	0.05907	46259296	3	1.63983e-15	CCR2 on CD62L+ myeloid Dendritic Cell	prostate cancer	4.64808e-15	0.0262012	77.167
rs61802333	T	G	T	G	0.3125	-0.0005	0.4627	0.494	1	161589982	0.0091	0.9523	140254	61106	outcome	2870	0.02782	161589982	1	1.12902e-28	CCR2 on CD62L+ myeloid Dendritic Cell	prostate cancer	2.73317e-28	0.0485564	146.367
rs6687275	G	T	G	T	0.2327	-0.022	0.2742	0.1708	1	161515638	0.0118	0.0628898	140254	61106	outcome	2870	0.03137	161515638	1	1.55812e-13	CCR2 on CD62L+ myeloid Dendritic Cell	prostate cancer	1.72844e-12	0.021553	63.1755
rs10882701	C	A	C	A	-0.3837	-0.0017	0.5156	0.5719	10	97741071	0.009	0.8465	140254	61106	outcome	2920	0.0273	97741071	10	1.78115e-43	CD39 on CD39+ CD4+ T cell	prostate cancer	6.77419e-43	0.0735412	231.627
rs11188757	C	A	C	A	-0.201	0.0069	0.2195	0.2947	10	98205222	0.009	0.443	140254	61106	outcome	2920	0.03424	98205222	10	4.83604e-09	CD39 on CD39+ CD4+ T cell	prostate cancer	1.28225e-08	0.013843	40.9608
rs1410600	T	C	T	C	-0.2329	-0.0074	0.4053	0.4997	10	97070694	0.0081	0.361	140254	61106	outcome	2920	0.02819	97070694	10	2.1928e-16	CD39 on CD39+ CD4+ T cell	prostate cancer	1.11174e-15	0.0261483	78.3495
rs2901833	A	G	A	G	0.2703	-0.0119	0.3848	0.3926	10	96998591	0.0083	0.1504	140254	61106	outcome	2920	0.02839	96998591	10	3.43084e-21	CD39 on CD39+ CD4+ T cell	prostate cancer	4.77036e-20	0.0345918	104.556
rs7099844	G	T	G	T	1.028	0.0087	0.4291	0.494	10	97506042	0.0081	0.2814	140254	61106	outcome	2920	0.02079	97506042	10	1e-200	CD39 on CD39+ CD4+ T cell	prostate cancer	0	0.517767	3133.02
rs2337147	A	G	A	G	-0.165	0.0009	0.3544	0.2035	18	46483810	0.0103	0.9315	140254	61106	outcome	2909	0.02926	46483810	18	1.85999e-08	CD39 on monocyte	prostate cancer	2.72828e-08	0.0124582	36.6728
rs77346511	T	C	T	C	-0.2936	0.0127	0.0756	0.0393	11	5268498	0.0226	0.5748	140254	61106	outcome	2909	0.05364	5268498	11	4.79005e-08	CD39 on monocyte	prostate cancer	9.96116e-08	0.0120482	35.4514
rs139795227	C	A	C	A	-1.147	0.0103	0.0481	0.021	1	92842367	0.0316	0.745399	140254	61106	outcome	2850	0.06195	92842367	1	2.33776e-72	CD80 on monocyte	prostate cancer	6.68588e-72	0.120474	390.108
rs141264358	C	T	C	T	-0.5868	0.0264	0.016	0.0248	1	90530314	0.0282	0.3481	140254	61106	outcome	2850	0.1067	90530314	1	4.18196e-08	CD80 on monocyte	prostate cancer	1.14568e-07	0.0108424	31.2176
rs35075155	C	T	C	T	-0.1646	-0.0058	0.4402	0.373	3	53273195	0.0088	0.5124	140254	61106	outcome	2850	0.02843	53273195	3	7.76497e-09	CD80 on monocyte	prostate cancer	1.83773e-08	0.0133528	38.5435
rs758800	C	T	C	T	0.6619	-0.006	0.8956	0.9478	3	52529266	0.0185	0.743201	140254	61106	outcome	2850	0.04462	52529266	3	5.12153e-48	CD80 on monocyte	prostate cancer	2.34063e-47	0.0819274	254.151
rs76064946	G	T	G	T	-0.35	-0.0052	0.1204	0.0403	1	93926697	0.0231	0.8216	140254	61106	outcome	2850	0.04248	93926697	1	2.60976e-16	CD80 on monocyte	prostate cancer	5.89057e-16	0.0259464	75.8639
rs79015439	T	C	T	C	-0.7914	-0.0265	0.0126	0.0218	1	94803124	0.0327	0.4181	140254	61106	outcome	2850	0.1209	94803124	1	6.94065e-11	CD80 on monocyte	prostate cancer	2.1689e-10	0.0155842	45.0866
rs11615628	A	G	A	G	-0.2479	0.0124	0.2466	0.2929	12	6903631	0.0096	0.1981	140254	61106	outcome	2920	0.03131	6903631	12	3.35738e-15	CD4 on activated CD4 regulatory T cell	prostate cancer	2.47802e-14	0.022835	68.1898
rs9266064	T	C	T	C	-0.1748	-0.0306	0.4656	0.4982	6	31319457	0.0079	0.000120099	140254	61106	outcome	2920	0.0296	31319457	6	3.97301e-09	CD4 on activated CD4 regulatory T cell	prostate cancer	1.29554e-07	0.0152052	45.0538
rs1152928	G	A	G	A	-0.7519	0.0071	0.0165	0.0195	12	69247557	0.0302	0.8143	140254	61106	outcome	3112	0.1023	69247557	12	2.47913e-13	SSC-A on CD14+ monocyte	prostate cancer	5.46739e-13	0.0183488	58.1315
rs11554159	A	G	A	G	-0.2988	0.0179	0.2995	0.2616	19	18285944	0.0091	0.0484898	140254	61106	outcome	3112	0.0284	18285944	19	1.8218e-25	SSC-A on CD14+ monocyte	prostate cancer	8.79272e-24	0.0374624	121.043
rs148146302	C	G	C	G	-0.8012	-0.0131	0.023	0.0116	12	70360198	0.0398	0.7417	140254	61106	outcome	3112	0.08571	70360198	12	1.64892e-20	SSC-A on CD14+ monocyte	prostate cancer	5.52845e-20	0.0288492	92.3864
rs1800973	A	C	A	C	-1.048	-0.0181	0.0845	0.0717	12	69744014	0.0175	0.2999	140254	61106	outcome	3112	0.04423	69744014	12	3.2961e-114	SSC-A on CD14+ monocyte	prostate cancer	2.36701e-113	0.169929	636.668
rs75994780	A	G	A	G	-0.3607	0.0109	0.0625	0.0281	12	70949085	0.029	0.706999	140254	61106	outcome	3112	0.05457	70949085	12	4.48023e-11	SSC-A on CD14+ monocyte	prostate cancer	1.0051e-10	0.0152466	48.1511
rs11074934	T	C	T	C	-0.4126	-0.0005	0.2193	0.2682	16	10979440	0.0098	0.9571	140254	61106	outcome	1635	0.04076	10979440	16	2.13895e-23	HLA DR on CD33dim HLA DR+ CD11b-	prostate cancer	2.43778e-23	0.0582923	101.084
rs61742525	A	G	A	G	0.3935	0.0104	0.0917	0.0125	6	33072522	0.0364	0.774499	140254	61106	outcome	1635	0.06679	33072522	6	4.65404e-09	HLA DR on CD33dim HLA DR+ CD11b-	prostate cancer	6.45071e-09	0.025794	43.2368
rs6917212	G	C	G	C	-0.4456	0.0222	0.7639	0.5817	6	32583005	0.0081	0.00623405	140254	61106	outcome	1635	0.04403	32583005	6	2.13993e-23	HLA DR on CD33dim HLA DR+ CD11b-	prostate cancer	4.34302e-22	0.0716231	125.984
rs9269109	C	T	C	T	0.3702	-0.0305	0.3575	0.6613	6	32443266	0.0084	0.000270097	140254	61106	outcome	1635	0.04014	32443266	6	8.63973e-20	HLA DR on CD33dim HLA DR+ CD11b-	prostate cancer	3.33237e-18	0.0629582	109.718
rs12874404	G	A	G	A	0.173	-0.0188	0.3256	0.0595	13	108993494	0.0193	0.3308	140254	61106	outcome	3656	9.13903e-11	13	0.02661	108993494	Memory B cell Absolute Count	prostate cancer	4.10762e-10	0.0131439	48.6675
rs140380950	C	T	C	T	-0.3597	0.013	0.0368	0.012	2	105587803	0.0447	0.772101	140254	61106	outcome	3656	2.067e-08	2	0.06402	105587803	IgD+ CD38+ B cell %lymphocyte	prostate cancer	3.98005e-08	0.00917223	33.8256
rs12874404	G	A	G	A	0.1827	-0.0188	0.3256	0.0595	13	108993494	0.0193	0.3308	140254	61106	outcome	3656	4.02346e-12	13	0.02625	108993494	Unswitched memory B cell %lymphocyte	prostate cancer	2.08614e-11	0.0146592	54.3615
rs6032660	A	G	A	G	-0.1525	-0.0003	0.6359	0.7431	20	44730245	0.0093	0.9731	140254	61106	outcome	3656	7.19797e-09	20	0.02629	44730245	Unswitched memory B cell %lymphocyte	prostate cancer	1.11714e-08	0.0107691	39.7787
rs73192651	T	C	T	C	0.5455	-0.0061	0.02	0.0087	13	50212885	0.0514	0.9056	140254	61106	outcome	3656	6.53597e-10	13	0.08807	50212885	Unswitched memory B cell %lymphocyte	prostate cancer	1.16913e-09	0.0116648	43.1261
rs77762131	C	G	C	G	0.3287	-0.0699	0.045	0.02	14	96205838	0.0334	0.0364099	140254	61106	outcome	3656	8.74903e-09	14	0.05701	96205838	Unswitched memory B cell %lymphocyte	prostate cancer	8.83474e-08	0.00928636	34.2504
rs115805162	T	C	T	C	-0.2046	-0.0042	0.2084	0.0657	1	161410253	0.0172	0.8093	140254	61106	outcome	3410	5.25001e-10	1	0.03284	161410253	Myeloid Dendritic Cell %Dendritic Cell	prostate cancer	1.02317e-09	0.0138116	47.7292
rs71632979	G	A	G	A	0.6258	-0.0188	0.2447	0.1189	1	161526397	0.0135	0.1661	140254	61106	outcome	3410	8.46058e-99	1	0.0287	161526397	Myeloid Dendritic Cell %Dendritic Cell	prostate cancer	1.36376e-96	0.144762	576.856
rs2164210	C	T	C	T	0.1937	0.0051	0.3244	0.7224	2	136580287	0.0097	0.601399	140254	61106	outcome	3374	2.11787e-13	2	0.02628	136580287	Plasmacytoid Dendritic Cell Absolute Count	prostate cancer	6.84146e-13	0.016446	56.3831
rs876039	C	G	C	G	-0.1971	0.0057	0.2619	0.3218	7	50308811	0.0093	0.5428	140254	61106	outcome	3374	9.51481e-13	7	0.02752	50308811	Plasmacytoid Dendritic Cell Absolute Count	prostate cancer	3.28998e-12	0.0150194	51.4178
rs113435341	G	A	G	A	-2.18	-0.0424	0.0032	0.0194	1	198151688	0.0318	0.1815	140254	61106	outcome	3437	9.94489e-23	1	0.2206	198151688	Secreting CD4 regulatory T cell %CD4+ T cell	prostate cancer	1.90448e-21	0.030318	107.399
rs11579717	A	G	A	G	-1.625	0.011	0.0044	0.0434	1	199999121	0.0222	0.62	140254	61106	outcome	3437	4.48642e-18	1	0.1865	199999121	Secreting CD4 regulatory T cell %CD4+ T cell	prostate cancer	1.91001e-17	0.0231353	81.3517
rs12712610	G	A	G	A	-0.1818	-0.0188	0.2975	0.1786	2	38897249	0.0113	0.0953301	140254	61106	outcome	3437	5.43e-11	2	0.02763	38897249	Secreting CD4 regulatory T cell %CD4+ T cell	prostate cancer	4.69484e-10	0.013815	48.1193
rs138915779	A	C	A	C	-1.514	0.0528	0.0035	0.0162	1	190079170	0.035	0.1315	140254	61106	outcome	3437	4.10677e-11	1	0.2286	190079170	Secreting CD4 regulatory T cell %CD4+ T cell	prostate cancer	3.06828e-10	0.0159892	55.8154
rs138960714	C	A	C	A	-2.942	-0.0566	0.0006	0.0083	4	123422719	0.0513	0.2695	140254	61106	outcome	3437	4.97096e-09	4	0.5018	123422719	Secreting CD4 regulatory T cell %CD4+ T cell	prostate cancer	2.00714e-08	0.0103802	36.03
rs74830391	T	C	T	C	0.1999	-0.0263	0.1525	0.1053	7	37427289	0.0137	0.0541602	140254	61106	outcome	3437	4.14e-08	7	0.03637	37427289	Secreting CD4 regulatory T cell %CD4+ T cell	prostate cancer	2.9798e-07	0.0103292	35.851
rs7893324	C	T	C	T	0.2816	-0.0156	0.1562	0.1366	10	6111075	0.0116	0.1799	140254	61106	outcome	3437	1.3671e-15	10	0.03509	6111075	Secreting CD4 regulatory T cell %CD4+ T cell	prostate cancer	1.41517e-14	0.0209033	73.336
rs10905719	A	G	A	G	0.1734	0.0172	0.2082	0.3151	10	6115171	0.0085	0.0425804	140254	61106	outcome	3437	4.88495e-08	10	0.03172	6115171	CD25++ CD45RA+ CD4 not regulatory T cell %T cell	prostate cancer	3.78522e-07	0.00991344	34.3936
rs11124653	A	C	A	C	-0.1952	-0.0004	0.5911	0.6084	2	39112166	0.0083	0.9624	140254	61106	outcome	3437	1.35988e-13	2	0.02627	39112166	CD25++ CD45RA+ CD4 not regulatory T cell %T cell	prostate cancer	2.60937e-13	0.0184191	64.4567
rs116517602	T	C	T	C	1.875	-0.0148	0.0041	0.012	1	198922068	0.0421	0.725301	140254	61106	outcome	3437	1.49589e-22	1	0.1906	198922068	CD25++ CD45RA+ CD4 not regulatory T cell %T cell	prostate cancer	6.6948e-22	0.0287099	101.534
rs61836370	G	A	G	A	0.6084	-0.012	0.0145	0.051	1	188691469	0.0224	0.5905	140254	61106	outcome	3437	1.57801e-08	1	0.1074	188691469	CD25++ CD45RA+ CD4 not regulatory T cell %T cell	prostate cancer	3.70443e-08	0.0105787	36.7264
rs1801274	G	A	G	A	0.2617	-0.0078	0.3334	0.5082	1	161479745	0.0082	0.3417	140254	61106	outcome	1858	8.34065e-14	1	0.03479	161479745	CD33dim HLA DR+ CD11b+ Absolute Count	prostate cancer	2.39119e-13	0.0304417	58.2737
rs146620586	T	G	T	G	1.949	-0.0372	0.0032	0.0173	1	198524264	0.0373	0.3183	140254	61106	outcome	3427	5.29541e-12	1	0.2815	198524264	Terminally Differentiated CD8+ T cell %CD8+ T cell	prostate cancer	2.56132e-11	0.0242333	85.0602
rs6707421	G	A	G	A	0.246	-0.0165	0.3011	0.1677	2	38897781	0.0115	0.1514	140254	61106	outcome	3427	1.20587e-19	2	0.02696	38897781	Terminally Differentiated CD8+ T cell %CD8+ T cell	prostate cancer	2.01745e-18	0.0254698	89.5141
rs79827501	T	G	T	G	-0.3142	-0.0227	0.0732	0.0409	2	38431267	0.021	0.2808	140254	61106	outcome	3427	4.97279e-11	2	0.04765	38431267	Terminally Differentiated CD8+ T cell %CD8+ T cell	prostate cancer	2.39906e-10	0.0133949	46.5004
rs67851010	A	G	A	G	0.3066	-0.0358	0.7905	0.8068	6	32501347	0.0113	0.001573	140254	61106	outcome	3650	1.90414e-11	6	0.04553	32501347	TCRgd T cell Absolute Count	prostate cancer	8.83357e-10	0.0311358	117.234
rs12224032	G	C	G	C	0.1721	-0.0116	0.2087	0.1991	11	112914680	0.01	0.2462	140254	61106	outcome	3653	2.78099e-08	11	0.03092	112914680	Natural Killer T Absolute Count	prostate cancer	1.14731e-07	0.00978262	36.0692
rs75494211	A	G	A	G	0.4706	0.0201	0.0328	0.0367	6	101911859	0.023	0.3827	140254	61106	outcome	3653	2.22382e-11	6	0.07011	101911859	Natural Killer T Absolute Count	prostate cancer	9.608e-11	0.0140515	52.0333
rs7819099	G	A	G	A	0.1387	-0.0006	0.5116	0.4214	8	144992862	0.0085	0.9441	140254	61106	outcome	3653	2.844e-08	8	0.02493	144992862	Natural Killer T Absolute Count	prostate cancer	4.42878e-08	0.00961367	35.4402
rs78268116	T	C	T	C	-0.4086	0.0079	0.1096	0.0337	11	112705025	0.0241	0.743201	140254	61106	outcome	3653	2.79383e-25	11	0.03904	112705025	Natural Killer T Absolute Count	prostate cancer	1.48551e-24	0.0325854	122.976
rs9916629	C	T	C	T	0.1457	-0.0029	0.5123	0.317	17	33796260	0.0089	0.7424	140254	61106	outcome	3653	4.132e-09	17	0.02472	33796260	Natural Killer T Absolute Count	prostate cancer	8.56703e-09	0.0106078	39.1444
rs11641185	T	C	T	C	-0.2989	0.0053	0.7744	0.7319	16	10986596	0.0099	0.5882	140254	61106	outcome	3595	4.5196e-32	16	0.02511	10986596	HLA DR+ CD4+ T cell %T cell	prostate cancer	4.52883e-31	0.0312166	115.776
rs183053322	T	C	T	C	-0.3926	0.0052	0.0356	0.0124	1	25076059	0.0443	0.9059	140254	61106	outcome	3653	3.83001e-09	1	0.06648	25076059	Natural Killer Absolute Count	prostate cancer	6.57539e-09	0.0105837	39.0545
rs7216096	A	G	A	G	0.2022	-0.0028	0.1622	0.1872	17	33772954	0.0106	0.791799	140254	61106	outcome	3653	6.55104e-10	17	0.03265	33772954	Natural Killer Absolute Count	prostate cancer	1.35825e-09	0.0111118	41.025
rs9916257	T	G	T	G	-0.2005	0.0065	0.5686	0.4305	17	33797371	0.0085	0.4467	140254	61106	outcome	3653	8.82064e-17	17	0.02398	33797371	Natural Killer Absolute Count	prostate cancer	5.25805e-16	0.0197218	73.4528
rs10786199	A	G	A	G	-0.2188	-0.0019	0.2895	0.4001	10	97069472	0.0083	0.8149	140254	61106	outcome	3408	3.14268e-14	10	0.02869	97069472	CD39+ CD4+ T cell Absolute Count	prostate cancer	7.55781e-14	0.0196942	68.4259
rs10882701	C	A	C	A	-0.4118	-0.0017	0.5139	0.5719	10	97741071	0.009	0.8465	140254	61106	outcome	3408	3.85301e-59	10	0.0249	97741071	CD39+ CD4+ T cell Absolute Count	prostate cancer	2.61904e-58	0.0847241	315.282
rs12268044	T	C	T	C	-0.1846	0.0098	0.3446	0.3899	10	98794615	0.0089	0.2683	140254	61106	outcome	3408	1.17706e-11	10	0.02711	98794615	CD39+ CD4+ T cell Absolute Count	prostate cancer	6.05266e-11	0.0153927	53.2472
rs141018090	T	G	T	G	0.5248	0.0035	0.0524	0.0137	10	98169221	0.0391	0.9295	140254	61106	outcome	3408	1.13501e-20	10	0.05593	98169221	CD39+ CD4+ T cell Absolute Count	prostate cancer	3.06479e-20	0.027351	95.7773
rs72809762	T	C	T	C	0.4486	0.0026	0.0675	0.0354	10	97294154	0.0221	0.905	140254	61106	outcome	3408	1.11789e-18	10	0.05056	97294154	CD39+ CD4+ T cell Absolute Count	prostate cancer	2.93272e-18	0.0253338	88.5299
rs111388649	A	G	A	G	26.26	0.0169	0.0001	0.0208	12	28246470	0.0288	0.5572	140254	61106	outcome	3425	2.22101e-08	12	4.684	28246470	CD45RA- CD28- CD8+ T cell %T cell	prostate cancer	5.34784e-08	0.137904	547.554
rs11233425	A	G	A	G	23.77	-0.0313	0.0003	0.0147	11	82732689	0.0375	0.4029	140254	61106	outcome	3425	5.92516e-11	11	3.62	82732689	CD45RA- CD28- CD8+ T cell %T cell	prostate cancer	2.23401e-10	0.338906	1754.78
rs114135956	C	T	C	T	32	0.0058	0.0003	0.0253	2	8930530	0.0336	0.8636	140254	61106	outcome	3425	2.61216e-19	2	3.541	8930530	CD45RA- CD28- CD8+ T cell %T cell	prostate cancer	7.6054e-19	0.614216	5449.83
rs114216104	T	C	T	C	30.16	0.0283	0.0001	0.0174	5	140131486	0.036	0.4319	140254	61106	outcome	3425	2.08978e-11	5	4.486	140131486	CD45RA- CD28- CD8+ T cell %T cell	prostate cancer	7.72972e-11	0.181907	761.121
rs115546994	T	A	T	A	15.77	0.0353	0.0004	0.009	5	159062854	0.0584	0.5451	140254	61106	outcome	3425	7.75604e-09	5	2.724	159062854	CD45RA- CD28- CD8+ T cell %T cell	prostate cancer	1.94856e-08	0.198875	849.74
rs115954619	A	G	A	G	9.757	0.0453	0.0015	0.0141	2	174896997	0.0383	0.237	140254	61106	outcome	3425	2.14902e-08	2	1.738	174896997	CD45RA- CD28- CD8+ T cell %T cell	prostate cancer	8.56307e-08	0.285169	1365.54
rs117006645	G	A	G	A	16.44	0.0292	0.0004	0.0076	10	108143796	0.0643	0.6495	140254	61106	outcome	3425	1.61599e-09	10	2.719	108143796	CD45RA- CD28- CD8+ T cell %T cell	prostate cancer	3.80714e-09	0.216132	943.809
rs117428784	A	C	A	C	24.71	0.0071	0.0004	0.013	19	43422957	0.044	0.8717	140254	61106	outcome	3425	4.53628e-14	19	3.261	43422957	CD45RA- CD28- CD8+ T cell %T cell	prostate cancer	1.00777e-13	0.488272	3266.1
rs117975109	T	G	T	G	15.84	-0.0242	0.0006	0.0084	12	52408142	0.0529	0.647	140254	61106	outcome	3425	3.64502e-08	12	2.869	52408142	CD45RA- CD28- CD8+ T cell %T cell	prostate cancer	7.63789e-08	0.300906	1473.34
rs12597262	G	C	G	C	29.78	-0.0251	0.0001	0.0073	16	86442575	0.0557	0.652501	140254	61106	outcome	3425	2.03301e-10	16	4.668	86442575	CD45RA- CD28- CD8+ T cell %T cell	prostate cancer	4.96254e-10	0.177352	737.953
rs12656604	A	C	A	C	5.388	0.0193	0.0047	0.0284	5	72679056	0.0262	0.4622	140254	61106	outcome	3425	1.952e-09	5	0.8953	72679056	CD45RA- CD28- CD8+ T cell %T cell	prostate cancer	5.8495e-09	0.271605	1276.37
rs140112233	C	G	C	G	43.28	0.0072	0.0001	0.0121	7	115835641	0.0392	0.8543	140254	61106	outcome	3425	1.74401e-10	7	6.761	115835641	CD45RA- CD28- CD8+ T cell %T cell	prostate cancer	3.32302e-10	0.374594	2050.25
rs143930177	A	G	A	G	4.44	0.0108	0.0072	0.0362	10	70543706	0.0247	0.6615	140254	61106	outcome	3425	2.66103e-09	10	0.7441	70543706	CD45RA- CD28- CD8+ T cell %T cell	prostate cancer	5.99351e-09	0.281832	1343.29
rs147264423	G	A	G	A	19.07	0.0309	0.0003	0.016	15	78644995	0.0343	0.3674	140254	61106	outcome	3425	9.78093e-09	15	3.318	78644995	CD45RA- CD28- CD8+ T cell %T cell	prostate cancer	3.20915e-08	0.218133	954.985
rs149487182	T	C	T	C	20.95	-0.0049	0.0004	0.0149	8	131518018	0.0407	0.9049	140254	61106	outcome	3425	2.45584e-12	8	2.979	131518018	CD45RA- CD28- CD8+ T cell %T cell	prostate cancer	4.77569e-12	0.350982	1851.12
rs149716976	G	A	G	A	4.577	0.007	0.0057	0.0197	16	75062625	0.0322	0.8274	140254	61106	outcome	3425	7.53304e-09	16	0.79	75062625	CD45RA- CD28- CD8+ T cell %T cell	prostate cancer	1.34255e-08	0.237457	1065.92
rs149994650	A	C	A	C	22.84	0.0997	0.0003	0.0129	3	18550864	0.0434	0.02172	140254	61106	outcome	3425	1.47099e-09	3	3.766	18550864	CD45RA- CD28- CD8+ T cell %T cell	prostate cancer	1.84388e-08	0.312905	1558.85
rs150146567	A	T	A	T	8.79	0.0171	0.0019	0.0089	2	12784208	0.0471	0.716199	140254	61106	outcome	3425	3.27899e-10	2	1.394	12784208	CD45RA- CD28- CD8+ T cell %T cell	prostate cancer	7.22358e-10	0.293046	1418.9
rs151077900	C	G	C	G	15.42	-0.0366	0.0004	0.0092	16	1037963	0.0557	0.5111	140254	61106	outcome	3425	8.83202e-09	16	2.675	1037963	CD45RA- CD28- CD8+ T cell %T cell	prostate cancer	2.35037e-08	0.190145	803.683
rs190272290	A	G	A	G	24.63	-0.0438	0.0003	0.0165	2	9944052	0.0379	0.2478	140254	61106	outcome	3425	2.34477e-11	2	3.673	9944052	CD45RA- CD28- CD8+ T cell %T cell	prostate cancer	1.2626e-10	0.363873	1958
rs192302673	T	C	T	C	12.63	-0.0392	0.0009	0.0145	16	85685140	0.0438	0.3707	140254	61106	outcome	3425	4.39198e-10	16	2.018	85685140	CD45RA- CD28- CD8+ T cell %T cell	prostate cancer	1.61012e-09	0.286872	1376.98
rs2977034	T	C	T	C	9.254	-0.0544	0.0015	0.0094	8	88503714	0.0466	0.2425	140254	61106	outcome	3425	1.08201e-08	8	1.615	88503714	CD45RA- CD28- CD8+ T cell %T cell	prostate cancer	4.46541e-08	0.256524	1181.05
rs34375694	G	A	G	A	18.3	-0.1173	0.0003	0.0094	16	19193363	0.0562	0.0368197	140254	61106	outcome	3425	1.03801e-08	16	3.188	19193363	CD45RA- CD28- CD8+ T cell %T cell	prostate cancer	9.32025e-08	0.200874	860.428
rs55881385	T	G	T	G	25.81	-0.0571	0.0001	0.0181	1	34724192	0.0356	0.1091	140254	61106	outcome	3425	1.66299e-09	1	4.27	34724192	CD45RA- CD28- CD8+ T cell %T cell	prostate cancer	1.10936e-08	0.133218	526.089
rs55971473	T	C	T	C	11.36	0.0517	0.001	0.0171	1	117061778	0.0358	0.1485	140254	61106	outcome	3425	1.67402e-09	1	1.879	117061778	CD45RA- CD28- CD8+ T cell %T cell	prostate cancer	9.52303e-09	0.257841	1189.22
rs61772921	C	T	C	T	31.35	0.0234	0.0001	0.0138	1	80897562	0.0362	0.5181	140254	61106	outcome	3425	1.94998e-10	1	4.91	80897562	CD45RA- CD28- CD8+ T cell %T cell	prostate cancer	5.81752e-10	0.196545	837.35
rs62021713	T	C	T	C	52.08	-0.0217	0.0001	0.0237	15	50365389	0.0302	0.4725	140254	61106	outcome	3425	2.169e-10	15	8.178	50365389	CD45RA- CD28- CD8+ T cell %T cell	prostate cancer	6.92295e-10	0.542411	4057.51
rs62409210	A	G	A	G	29.68	-0.0109	0.0001	0.0207	4	25412773	0.0326	0.7382	140254	61106	outcome	3425	2.02801e-09	4	4.936	25412773	CD45RA- CD28- CD8+ T cell %T cell	prostate cancer	4.15129e-09	0.176163	731.947
rs62488802	T	C	T	C	29.98	0.0465	0.0003	0.0184	8	7162695	0.0378	0.2185	140254	61106	outcome	3425	2.31206e-14	8	3.911	7162695	CD45RA- CD28- CD8+ T cell %T cell	prostate cancer	1.82179e-13	0.539118	4004.07
rs742867	T	C	T	C	7.048	-0.0042	0.0029	0.0107	14	68217724	0.0444	0.9238	140254	61106	outcome	3425	1.57e-10	14	1.098	68217724	CD45RA- CD28- CD8+ T cell %T cell	prostate cancer	2.72158e-10	0.287275	1379.7
rs74707627	C	T	C	T	20.97	0.0217	0.0003	0.0236	15	86484743	0.0286	0.4489	140254	61106	outcome	3425	2.49799e-10	15	3.305	86484743	CD45RA- CD28- CD8+ T cell %T cell	prostate cancer	8.32097e-10	0.263765	1226.33
rs75420474	C	T	C	T	28.44	0.0132	0.0003	0.0107	18	39828718	0.0425	0.7561	140254	61106	outcome	3425	1.56603e-16	18	3.429	39828718	CD45RA- CD28- CD8+ T cell %T cell	prostate cancer	4.72886e-16	0.485155	3225.6
rs76343453	C	T	C	T	10.98	0.0219	0.0018	0.0066	5	81353920	0.0531	0.6801	140254	61106	outcome	3425	2.97577e-13	5	1.499	81353920	CD45RA- CD28- CD8+ T cell %T cell	prostate cancer	8.45025e-13	0.433236	2616.55
rs76506268	G	A	G	A	6.353	-0.0055	0.0032	0.0353	4	187981624	0.0268	0.836	140254	61106	outcome	3425	1.52202e-09	4	1.049	187981624	CD45RA- CD28- CD8+ T cell %T cell	prostate cancer	2.84144e-09	0.257481	1186.98
rs76938777	A	G	A	G	18.92	0.0285	0.0003	0.0123	7	31473901	0.0376	0.4478	140254	61106	outcome	3425	1.36801e-08	7	3.324	31473901	CD45RA- CD28- CD8+ T cell %T cell	prostate cancer	3.86064e-08	0.214715	935.929
rs78823021	A	C	A	C	26.55	-0.0617	0.0001	0.0136	14	44303945	0.0375	0.0995497	140254	61106	outcome	3425	1.18801e-09	14	4.353	44303945	CD45RA- CD28- CD8+ T cell %T cell	prostate cancer	8.38633e-09	0.140966	561.71
rs79190516	G	T	G	T	10.56	0.018	0.0012	0.0085	2	151197759	0.0476	0.705399	140254	61106	outcome	3425	1.64399e-08	2	1.865	151197759	CD45RA- CD28- CD8+ T cell %T cell	prostate cancer	3.26704e-08	0.267311	1248.84
rs73165129	T	C	T	C	-0.5191	0.0018	0.0987	0.0803	22	42315371	0.0148	0.904	140254	61106	outcome	3592	6.74528e-37	22	0.04044	42315371	BAFF-R on CD20- CD38- B cell	prostate cancer	3.54005e-36	0.0479423	180.78
rs117086217	G	A	G	A	-0.5093	-0.0397	0.0343	0.0242	22	39876838	0.0302	0.188	140254	61106	outcome	3657	4.41876e-14	22	0.06721	39876838	BAFF-R on IgD+ CD24+ B cell	prostate cancer	4.13791e-13	0.0171836	63.9041
rs118137006	C	A	C	A	-0.7396	0.0481	0.015	0.0135	22	40727723	0.0419	0.2509	140254	61106	outcome	3657	1.91602e-12	22	0.1047	40727723	BAFF-R on IgD+ CD24+ B cell	prostate cancer	1.25198e-11	0.0161641	60.0504
rs2142827	A	G	A	G	-0.3265	0.0056	0.1416	0.2342	22	42874781	0.0115	0.6265	140254	61106	outcome	3657	1.48115e-19	22	0.03588	42874781	BAFF-R on IgD+ CD24+ B cell	prostate cancer	7.24235e-19	0.0259149	97.2388
rs5758649	T	C	T	C	-0.5902	0.0151	0.0871	0.0275	22	42605548	0.0261	0.5629	140254	61106	outcome	3657	1.09194e-38	22	0.04484	42605548	BAFF-R on IgD+ CD24+ B cell	prostate cancer	1.64596e-37	0.0553949	214.342
rs73165129	T	C	T	C	-1.487	0.0018	0.099	0.0803	22	42315371	0.0148	0.904	140254	61106	outcome	3657	1e-200	22	0.03398	42315371	BAFF-R on IgD+ CD24+ B cell	prostate cancer	0	0.394468	2381.02
rs75056525	A	G	A	G	-0.5571	0.0613	0.0762	0.0266	22	43349884	0.0248	0.01341	140254	61106	outcome	3657	3.31589e-31	22	0.0475	43349884	BAFF-R on IgD+ CD24+ B cell	prostate cancer	1.1005e-28	0.0436947	167.001
rs9614288	T	A	T	A	-0.3097	0.0152	0.2346	0.2413	22	44297686	0.0109	0.1634	140254	61106	outcome	3657	5.05243e-26	22	0.02913	44297686	BAFF-R on IgD+ CD24+ B cell	prostate cancer	1.63334e-24	0.0344452	130.389
rs117086217	G	A	G	A	-0.5069	-0.0397	0.0343	0.0242	22	39876838	0.0302	0.188	140254	61106	outcome	3657	5.38642e-14	22	0.06712	39876838	BAFF-R on memory B cell	prostate cancer	4.97786e-13	0.017022	63.2928
rs118137006	C	A	C	A	-0.7493	0.0481	0.015	0.0135	22	40727723	0.0419	0.2509	140254	61106	outcome	3657	9.14324e-13	22	0.1045	40727723	BAFF-R on memory B cell	prostate cancer	6.05572e-12	0.0165909	61.6626
rs13058590	T	C	T	C	-0.3667	0.0113	0.0468	0.0176	22	39641412	0.0341	0.7405	140254	61106	outcome	3657	6.48903e-10	22	0.0592	39641412	BAFF-R on memory B cell	prostate cancer	1.44109e-09	0.0119972	44.3824
rs146069723	T	C	T	C	-0.5694	0.1283	0.0756	0.0153	22	43339331	0.0323	7.26106e-05	140254	61106	outcome	3657	2.94578e-32	22	0.04769	43339331	BAFF-R on memory B cell	prostate cancer	1.61846e-28	0.0453155	173.49
rs187315152	T	A	T	A	-0.5177	-0.0357	0.0535	0.0157	22	41305795	0.0389	0.359	140254	61106	outcome	3657	1.2331e-18	22	0.05843	41305795	BAFF-R on memory B cell	prostate cancer	1.04824e-17	0.0271432	101.976
rs2142827	A	G	A	G	-0.3357	0.0056	0.1416	0.2342	22	42874781	0.0115	0.6265	140254	61106	outcome	3657	1.21591e-20	22	0.03582	42874781	BAFF-R on memory B cell	prostate cancer	6.44503e-20	0.0273959	102.953
rs5758649	T	C	T	C	-0.6016	0.0151	0.0871	0.0275	22	42605548	0.0261	0.5629	140254	61106	outcome	3657	3.36899e-40	22	0.04478	42605548	BAFF-R on memory B cell	prostate cancer	5.41972e-39	0.0575555	223.213
rs73165129	T	C	T	C	-1.488	0.0018	0.099	0.0803	22	42315371	0.0148	0.904	140254	61106	outcome	3657	1e-200	22	0.0339	42315371	BAFF-R on memory B cell	prostate cancer	0	0.394999	2386.31
rs9614288	T	A	T	A	-0.3115	0.0152	0.2346	0.2413	22	44297686	0.0109	0.1634	140254	61106	outcome	3657	2.28613e-26	22	0.02909	44297686	BAFF-R on memory B cell	prostate cancer	7.56453e-25	0.0348468	131.963
rs112417310	A	G	A	G	0.5237	-0.0128	0.0201	0.0109	1	206855483	0.0423	0.7623	140254	61106	outcome	3656	3.79796e-09	1	0.08866	206855483	CD19 on IgD+ CD24- B cell	prostate cancer	7.78118e-09	0.0108037	39.9079
rs113812519	G	A	G	A	0.5314	-0.0433	0.0185	0.0133	1	207276336	0.0425	0.3079	140254	61106	outcome	3656	6.41904e-09	1	0.09132	207276336	CD19 on IgD+ CD24- B cell	prostate cancer	2.50651e-08	0.010255	37.86
rs138920008	C	G	C	G	-1.188	-0.0132	0.0041	0.0432	16	32422808	0.0265	0.6181	140254	61106	outcome	3656	4.50298e-08	16	0.2168	32422808	CD19 on IgD+ CD24- B cell	prostate cancer	1.02507e-07	0.0115256	42.6055
rs79856590	A	G	A	G	0.281	0.0407	0.0609	0.0375	1	205241642	0.0223	0.0679407	140254	61106	outcome	3656	3.75898e-08	1	0.05096	205241642	CD19 on IgD+ CD24- B cell	prostate cancer	2.68036e-07	0.00903175	33.3028
rs113812519	G	A	G	A	0.5863	-0.0433	0.0185	0.0133	1	207276336	0.0425	0.3079	140254	61106	outcome	3657	2.61198e-10	1	0.09251	207276336	CD19 on transitional B cell	prostate cancer	1.18612e-09	0.0124834	46.2035
rs138920008	C	G	C	G	-1.3	-0.0132	0.0041	0.0432	16	32422808	0.0265	0.6181	140254	61106	outcome	3657	3.41303e-09	16	0.2194	32422808	CD19 on transitional B cell	prostate cancer	8.40919e-09	0.0138012	51.1492
rs144743804	A	G	A	G	0.539	-0.0721	0.0197	0.0102	1	207018206	0.0479	0.1325	140254	61106	outcome	3657	2.357e-09	1	0.09004	207018206	CD19 on transitional B cell	prostate cancer	1.51845e-08	0.011221	41.4783
rs55712453	G	A	G	A	0.5582	-0.0179	0.0201	0.0109	1	206902437	0.0426	0.674899	140254	61106	outcome	3657	8.33508e-10	1	0.0907	206902437	CD19 on transitional B cell	prostate cancer	2.00394e-09	0.012274	45.4191
rs10501383	T	C	T	C	-0.2991	-0.0101	0.0971	0.0806	11	60164527	0.0149	0.4972	140254	61106	outcome	3657	3.60911e-13	11	0.04099	60164527	CD20 on switched memory B cell	prostate cancer	1.46999e-12	0.0156863	58.2473
rs11751198	A	G	A	G	0.2182	-0.036	0.1839	0.0422	6	31753526	0.0203	0.0761097	140254	61106	outcome	3657	4.51898e-09	6	0.03712	31753526	CD20 on switched memory B cell	prostate cancer	3.5753e-08	0.0142911	52.9911
rs1569590	G	A	G	A	0.207	-0.008	0.8748	0.91	6	15898884	0.0146	0.5835	140254	61106	outcome	3657	2.87601e-08	6	0.03723	15898884	CD20 on switched memory B cell	prostate cancer	6.92073e-08	0.00938607	34.6311
rs35039517	A	G	A	G	0.1894	-0.0136	0.203	0.1723	10	94522438	0.0109	0.2124	140254	61106	outcome	3657	1.99802e-09	10	0.0315	94522438	CD20 on switched memory B cell	prostate cancer	1.02524e-08	0.0116076	42.9242
rs55809481	C	T	C	T	-0.3215	0.0058	0.2425	0.2478	19	49872521	0.0093	0.5316	140254	61106	outcome	3657	9.31322e-29	19	0.02865	49872521	CD20 on switched memory B cell	prostate cancer	9.8026e-28	0.037974	144.274
rs61731791	T	C	T	C	0.2358	-0.0257	0.0972	0.0386	19	50940778	0.0216	0.2344	140254	61106	outcome	3657	2.82599e-08	19	0.04238	50940778	CD20 on switched memory B cell	prostate cancer	1.19158e-07	0.00975833	36.0182
rs3793662	T	C	T	C	-0.1749	0.0016	0.7759	0.8052	9	95886051	0.0102	0.8731	140254	61106	outcome	3642	2.377e-09	9	0.02923	95886051	CD25 on IgD+ CD38- B cell	prostate cancer	4.30481e-09	0.0106379	39.1384
rs41295093	A	G	A	G	0.4244	-0.0061	0.1068	0.0494	10	6120173	0.0184	0.738401	140254	61106	outcome	3642	1.10688e-25	10	0.0402	6120173	CD25 on IgD+ CD38- B cell	prostate cancer	5.95045e-25	0.0343638	129.535
rs10905716	T	C	T	C	-0.4537	-0.0117	0.2439	0.2133	10	6114010	0.0098	0.2332	140254	61106	outcome	1837	6.15035e-33	10	0.03721	6114010	CD25 on IgD+ CD38- unswitched memory B cell	prostate cancer	3.17998e-32	0.0759204	150.76
rs1883832	C	T	C	T	-0.4972	-0.001	0.6317	0.743	20	44746982	0.0093	0.9127	140254	61106	outcome	3656	2.97989e-83	20	0.02506	44746982	CD27 on IgD+ CD24+ B cell	prostate cancer	2.01613e-82	0.115028	474.946
rs25680	A	G	A	G	-0.1925	-0.0109	0.167	0.2186	12	6554628	0.0108	0.3134	140254	61106	outcome	3656	1.14599e-08	12	0.03366	6554628	CD27 on IgD+ CD24+ B cell	prostate cancer	4.35199e-08	0.0103099	38.0647
rs35574803	C	T	C	T	0.7463	0.0389	0.0561	0.0222	3	32533246	0.0298	0.192	140254	61106	outcome	3656	2.34585e-43	3	0.05335	32533246	CD27 on IgD+ CD24+ B cell	prostate cancer	2.05598e-41	0.0589856	229.044
rs75918255	A	G	A	G	0.4946	-0.0097	0.035	0.0232	3	32945761	0.0332	0.769501	140254	61106	outcome	3656	5.54243e-13	3	0.06834	32945761	CD27 on IgD+ CD24+ B cell	prostate cancer	1.43733e-12	0.0165247	61.3958
rs7621492	A	G	A	G	0.2435	0.0241	0.1136	0.0463	3	32302456	0.0223	0.281	140254	61106	outcome	3656	1.18201e-09	3	0.03994	32302456	CD27 on IgD+ CD24+ B cell	prostate cancer	5.35974e-09	0.0119409	44.1592
rs76929865	C	A	C	A	0.5735	-0.0082	0.0223	0.02	3	31134534	0.0334	0.8061	140254	61106	outcome	3656	5.04429e-11	3	0.08703	31134534	CD27 on IgD+ CD24+ B cell	prostate cancer	1.09887e-10	0.0143419	53.1679
rs1883832	C	T	C	T	-0.5071	-0.001	0.6318	0.743	20	44746982	0.0093	0.9127	140254	61106	outcome	3657	1.87802e-87	20	0.0249	44746982	CD27 on memory B cell	prostate cancer	1.35883e-86	0.119641	496.716
rs25680	A	G	A	G	-0.213	-0.0109	0.1671	0.2186	12	6554628	0.0108	0.3134	140254	61106	outcome	3657	2.12902e-10	12	0.03344	6554628	CD27 on memory B cell	prostate cancer	9.65738e-10	0.0126287	46.7483
rs35574803	C	T	C	T	0.6708	0.0389	0.0562	0.0222	3	32533246	0.0298	0.192	140254	61106	outcome	3657	1.49211e-35	3	0.05333	32533246	CD27 on memory B cell	prostate cancer	8.27705e-34	0.0477345	183.215
rs56237381	A	G	A	G	0.4286	0.0213	0.0272	0.0283	3	32924804	0.0282	0.4504	140254	61106	outcome	3657	2.94598e-08	3	0.07713	32924804	CD27 on memory B cell	prostate cancer	8.45932e-08	0.00972135	35.8804
rs72485816	C	T	C	T	-0.4093	-0.0113	0.0304	0.0377	20	45314435	0.0232	0.6255	140254	61106	outcome	3657	1.77198e-08	20	0.0725	45314435	CD27 on memory B cell	prostate cancer	4.08959e-08	0.00987597	36.4567
rs75918255	A	G	A	G	0.4366	-0.0097	0.035	0.0232	3	32945761	0.0332	0.769501	140254	61106	outcome	3657	1.567e-10	3	0.06803	32945761	CD27 on memory B cell	prostate cancer	3.46295e-10	0.0128764	47.677
rs1037633	G	T	G	T	0.234	0.0295	0.124	0.0642	3	23750521	0.0179	0.0995795	140254	61106	outcome	3657	1.18801e-09	3	0.03837	23750521	IgD on transitional B cell	prostate cancer	9.08441e-09	0.0118956	44.002
rs200474	A	G	A	G	-0.1677	-0.026	0.3117	0.1728	6	27767640	0.0105	0.0131501	140254	61106	outcome	3657	1.717e-08	6	0.02967	27767640	IgD on transitional B cell	prostate cancer	2.2606e-07	0.0120673	44.6448
rs2018404	T	C	T	C	-0.2444	0.0021	0.1325	0.1774	14	105695446	0.0131	0.8718	140254	61106	outcome	3657	9.13903e-11	14	0.0376	105695446	IgD on transitional B cell	prostate cancer	1.7915e-10	0.0137315	50.8874
rs55871547	G	C	G	C	0.2309	-0.006	0.2752	0.2717	7	2354352	0.0096	0.5357	140254	61106	outcome	3657	1.75995e-16	7	0.0279	2354352	IgD on transitional B cell	prostate cancer	8.67906e-16	0.0212689	79.4271
rs709589	T	C	T	C	-0.5713	0.0005	0.4557	0.4292	14	106306841	0.0123	0.9698	140254	61106	outcome	3657	3.99577e-76	14	0.03022	106306841	IgD on transitional B cell	prostate cancer	2.61495e-75	0.161911	706.111
rs10882659	C	T	C	T	-0.2226	0.0087	0.4269	0.494	10	97510704	0.0081	0.2825	140254	61106	outcome	2919	3.43321e-16	10	0.02713	97510704	CD3 on CD39+ activated CD4 regulatory T cell	prostate cancer	2.09885e-15	0.0242458	72.4825
rs12138291	A	G	A	G	-0.2588	0.0095	0.1482	0.235	1	166464476	0.0098	0.3318	140254	61106	outcome	2919	1.41286e-11	1	0.03815	166464476	CD3 on CD39+ activated CD4 regulatory T cell	prostate cancer	5.47969e-11	0.01691	50.175
rs2949661	T	C	T	C	0.5797	0.0114	0.4466	0.3684	1	167424924	0.0085	0.1775	140254	61106	outcome	2919	5.29663e-108	1	0.02517	167424924	CD3 on CD39+ activated CD4 regulatory T cell	prostate cancer	6.85449e-107	0.166109	581.061
rs35055340	T	C	T	C	-0.4505	0.0177	0.0324	0.0665	1	165314063	0.0173	0.3063	140254	61106	outcome	2919	3.50897e-09	1	0.07604	165314063	CD3 on CD39+ activated CD4 regulatory T cell	prostate cancer	1.16238e-08	0.0127251	37.5975
rs1723018	G	A	G	A	0.4112	0.0105	0.4568	0.378	1	167433420	0.0083	0.206	140254	61106	outcome	2918	6.13479e-53	1	0.02631	167433420	CD3 on CD8+ T cell	prostate cancer	2.26811e-51	0.0839116	267.099
rs139489968	A	G	A	G	0.5509	-0.0779	0.1016	0.0155	1	208017826	0.0409	0.0565796	140254	61106	outcome	1634	3.98566e-20	1	0.05917	208017826	CD34 on Hematopoietic Stem Cell	prostate cancer	2.97258e-19	0.0554037	95.7223
rs36102158	A	G	A	G	0.2745	0.0166	0.1622	0.2091	15	50363583	0.0098	0.0905399	140254	61106	outcome	1634	1.893e-08	15	0.04858	50363583	CD34 on Hematopoietic Stem Cell	prostate cancer	6.08052e-08	0.0204789	34.1203
rs4406271	A	G	A	G	-0.2587	0.0062	0.4036	0.5259	6	109598213	0.008	0.4372	140254	61106	outcome	1634	1.00809e-12	6	0.036	109598213	CD34 on Hematopoietic Stem Cell	prostate cancer	2.183e-12	0.032219	54.3319
rs2070901	T	G	T	G	0.173	0.0087	0.2834	0.2661	1	161185058	0.0093	0.346	140254	61106	outcome	3112	6.37001e-09	1	0.02971	161185058	CD45 on granulocyte	prostate cancer	2.01897e-08	0.0121562	38.2711
rs1801274	G	A	G	A	-0.261	-0.0078	0.3299	0.5082	1	161479745	0.0082	0.3417	140254	61106	outcome	1634	1.83781e-11	1	0.03857	161479745	CD33 on CD33dim HLA DR+ CD11b-	prostate cancer	4.31606e-11	0.0301185	50.6797
rs3865444	A	C	A	C	-1.119	0.0143	0.2121	0.3273	19	51727962	0.0086	0.0949992	140254	61106	outcome	1634	2.39883e-183	19	0.03392	51727962	CD33 on CD33dim HLA DR+ CD11b-	prostate cancer	1.32279e-194	0.418506	1174.56
rs4801891	C	T	C	T	-0.2061	-0.0158	0.563	0.552	19	52254351	0.0083	0.0577803	140254	61106	outcome	1634	1.126e-08	19	0.0359	52254351	CD33 on CD33dim HLA DR+ CD11b-	prostate cancer	4.18235e-08	0.0209014	34.8393
rs58301181	G	C	G	C	-0.4079	0.0086	0.0872	0.106	19	52097261	0.0148	0.562501	140254	61106	outcome	1634	1.80901e-10	19	0.06357	52097261	CD33 on CD33dim HLA DR+ CD11b-	prostate cancer	3.19951e-10	0.0264868	44.4025
rs62114147	T	C	T	C	0.2978	0.0065	0.5511	0.5259	19	51588018	0.0085	0.4432	140254	61106	outcome	1634	1.23908e-16	19	0.03559	51588018	CD33 on CD33dim HLA DR+ CD11b-	prostate cancer	2.9245e-16	0.0438793	74.8974
rs73051934	G	A	G	A	-0.6094	-0.0175	0.0278	0.0111	19	48582916	0.0481	0.716	140254	61106	outcome	1634	7.88497e-09	19	0.105	48582916	CD33 on CD33dim HLA DR+ CD11b-	prostate cancer	1.13032e-08	0.0200741	33.432
rs7351079	G	A	G	A	-0.3832	0.0124	0.2708	0.1731	19	51574038	0.0106	0.2408	140254	61106	outcome	1634	2.9067e-21	19	0.03992	51574038	CD33 on CD33dim HLA DR+ CD11b-	prostate cancer	1.07945e-20	0.0579931	100.471
rs1800973	A	C	A	C	-0.3123	-0.0181	0.0798	0.0717	12	69744014	0.0175	0.2999	140254	61106	outcome	3629	1.06194e-11	12	0.04579	69744014	HLA DR on CD14+ CD16- monocyte	prostate cancer	5.58868e-11	0.0143238	52.7075
rs80032720	A	G	A	G	0.4253	-0.1133	0.0733	0.0185	6	32384933	0.0312	0.000287799	140254	61106	outcome	3629	7.76426e-15	6	0.0545	32384933	HLA DR on CD14+ CD16- monocyte	prostate cancer	1.19655e-12	0.0245733	91.3728
rs9270585	T	C	T	C	-0.6054	-0.0285	0.5834	0.5544	6	32561300	0.008	0.000373199	140254	61106	outcome	3629	3.03529e-98	6	0.0279	32561300	HLA DR on CD14+ CD16- monocyte	prostate cancer	1.18231e-92	0.178156	786.246
rs778582	T	C	T	C	0.1479	0.0011	0.3067	0.2937	5	140004816	0.0091	0.9062	140254	61106	outcome	3629	3.33603e-08	5	0.02672	140004816	PDL-1 on CD14+ CD16- monocyte	prostate cancer	5.40702e-08	0.00930254	34.0571
rs1801274	G	A	G	A	-0.4628	-0.0078	0.327	0.5082	1	161479745	0.0082	0.3417	140254	61106	outcome	3579	2.61517e-69	1	0.02573	161479745	CX3CR1 on CD14+ CD16+ monocyte	prostate cancer	1.90704e-67	0.0942713	372.306
rs2649752	A	C	A	C	0.1581	0.0118	0.2677	0.3331	3	39351805	0.0086	0.1686	140254	61106	outcome	3579	3.51099e-08	3	0.02862	39351805	CX3CR1 on CD14+ CD16+ monocyte	prostate cancer	1.6936e-07	0.00980011	35.402
rs9823718	G	C	G	C	-0.3271	-0.0036	0.132	0.0808	3	39293757	0.0156	0.8154	140254	61106	outcome	3579	5.15229e-19	3	0.03651	39293757	CX3CR1 on CD14+ CD16+ monocyte	prostate cancer	1.68292e-18	0.024518	89.9051
rs10882701	C	A	C	A	-0.3988	-0.0017	0.5156	0.5719	10	97741071	0.009	0.8465	140254	61106	outcome	2920	7.28283e-47	10	0.02725	97741071	CD39 on CD39+ secreting CD4 regulatory T cell	prostate cancer	2.75329e-46	0.0794433	251.821
rs11188757	C	A	C	A	-0.2006	0.0069	0.2195	0.2947	10	98205222	0.009	0.443	140254	61106	outcome	2920	5.35501e-09	10	0.03426	98205222	CD39 on CD39+ secreting CD4 regulatory T cell	prostate cancer	1.39864e-08	0.0137879	40.7957
rs12778797	C	T	C	T	0.2849	-0.0119	0.3854	0.3926	10	96998688	0.0083	0.1507	140254	61106	outcome	2920	2.24285e-23	10	0.02836	96998688	CD39 on CD39+ secreting CD4 regulatory T cell	prostate cancer	3.66038e-22	0.038452	116.69
rs1410600	T	C	T	C	-0.2442	-0.0074	0.4053	0.4997	10	97070694	0.0081	0.361	140254	61106	outcome	2920	6.97429e-18	10	0.02817	97070694	CD39 on CD39+ secreting CD4 regulatory T cell	prostate cancer	4.03919e-17	0.0287472	86.3672
rs1923692	G	T	G	T	-0.3401	0.0217	0.9466	0.9767	10	98173715	0.0325	0.5047	140254	61106	outcome	2920	2.19498e-08	10	0.06061	98173715	CD39 on CD39+ secreting CD4 regulatory T cell	prostate cancer	5.1045e-08	0.0116937	34.5259
rs7094484	G	A	G	A	1.011	0.0048	0.4729	0.5422	10	97490998	0.0081	0.5524	140254	61106	outcome	2920	1e-200	10	0.02071	97490998	CD39 on CD39+ secreting CD4 regulatory T cell	prostate cancer	0	0.509559	3031.75
rs139795227	C	A	C	A	-0.5725	0.0103	0.0479	0.021	1	92842367	0.0316	0.745399	140254	61106	outcome	2871	8.24328e-19	1	0.0642	92842367	CD80 on myeloid Dendritic Cell	prostate cancer	2.33748e-18	0.029895	88.4119
rs2325259	C	T	C	T	0.1995	0.0097	0.4422	0.3399	6	90850164	0.0085	0.2519	140254	61106	outcome	2871	1.16708e-12	6	0.02793	90850164	CD80 on myeloid Dendritic Cell	prostate cancer	5.68366e-12	0.0196342	57.4587
rs6787493	C	T	C	T	0.4055	-0.0015	0.8955	0.9447	3	52528000	0.0177	0.9319	140254	61106	outcome	2871	4.79181e-19	3	0.04516	52528000	CD80 on myeloid Dendritic Cell	prostate cancer	1.009e-18	0.0307747	91.096
rs71632979	G	A	G	A	0.3323	-0.0188	0.2457	0.1189	1	161526397	0.0135	0.1661	140254	61106	outcome	2871	1.06194e-25	1	0.0314	161526397	CD80 on myeloid Dendritic Cell	prostate cancer	1.78327e-24	0.0409298	122.439
rs12675298	A	G	A	G	-0.6716	-0.0296	0.0277	0.0156	8	6828813	0.0413	0.4737	140254	61106	outcome	2850	2.53922e-15	8	0.08441	6828813	CD80 on granulocyte	prostate cancer	9.52102e-15	0.0242958	70.9175
rs1886654	C	T	C	T	-0.2078	0.0135	0.8374	0.8969	1	236105910	0.0138	0.3269	140254	61106	outcome	2850	3.36403e-08	1	0.03753	236105910	CD80 on granulocyte	prostate cancer	9.67016e-08	0.0117591	33.8885
rs2981398	G	A	G	A	-0.2231	-0.0046	0.3354	0.3757	8	6801712	0.0091	0.6144	140254	61106	outcome	2850	1.77215e-14	8	0.02895	6801712	CD80 on granulocyte	prostate cancer	5.05699e-14	0.0221898	64.6306
rs11615628	A	G	A	G	-0.2062	0.0124	0.2466	0.2929	12	6903631	0.0096	0.1981	140254	61106	outcome	2920	5.4853e-11	12	0.03133	6903631	CD4 on CD39+ activated CD4 regulatory T cell	prostate cancer	2.74275e-10	0.0157989	46.8411
rs2253487	A	G	A	G	0.2209	0.0126	0.4719	0.4004	6	31249127	0.0081	0.1185	140254	61106	outcome	2920	1.42298e-13	6	0.02974	31249127	CD4 on CD39+ activated CD4 regulatory T cell	prostate cancer	1.19989e-12	0.0243213	72.7388
rs9263475	G	A	G	A	0.2029	-0.033	0.4865	0.2382	6	31050348	0.0095	0.000492799	140254	61106	outcome	2920	9.61391e-12	6	0.02967	31050348	CD4 on CD39+ activated CD4 regulatory T cell	prostate cancer	4.01095e-10	0.0205692	61.2814
rs1801274	G	A	G	A	0.461	-0.0078	0.3309	0.5082	1	161479745	0.0082	0.3417	140254	61106	outcome	1570	5.236e-32	1	0.03828	161479745	CD11b on Monocytic Myeloid-Derived Suppressor Cells	prostate cancer	1.35123e-31	0.0941065	162.888
rs760462	C	T	C	T	0.4384	-0.011	0.8262	0.8363	21	46328099	0.0121	0.3647	140254	61106	outcome	1559	5.30274e-20	21	0.04722	46328099	CD11b on CD33dim HLA DR-	prostate cancer	1.40602e-19	0.0551958	90.9605
rs113435341	G	A	G	A	1.787	-0.0424	0.0033	0.0194	1	198151688	0.0318	0.1815	140254	61106	outcome	2903	2.66011e-13	1	0.2432	198151688	CD4RA on Terminally Differentiated CD4+ T cell	prostate cancer	1.66916e-12	0.0210067	62.248
rs11579717	A	G	A	G	1.19	0.011	0.0045	0.0434	1	199999121	0.0222	0.62	140254	61106	outcome	2903	4.314e-09	1	0.202	199999121	CD4RA on Terminally Differentiated CD4+ T cell	prostate cancer	9.02945e-09	0.0126875	37.2796
rs7559619	G	A	G	A	-0.2144	0.0146	0.3455	0.3814	2	38892207	0.0088	0.0993299	140254	61106	outcome	2903	1.08993e-13	2	0.02871	38892207	CD4RA on Terminally Differentiated CD4+ T cell	prostate cancer	9.97423e-13	0.0207892	61.5898
rs116007826	G	A	G	A	0.751	0.0366	0.0686	0.0061	6	31569745	0.0563	0.5162	140254	61106	outcome	2872	7.60852e-34	6	0.06113	31569745	HLA DR on plasmacytoid Dendritic Cell	prostate cancer	5.53555e-33	0.0720726	222.914
rs11644019	T	C	T	C	-0.291	-0.0081	0.1398	0.218	16	10863414	0.0109	0.4578	140254	61106	outcome	2872	1.10408e-13	16	0.03898	10863414	HLA DR on plasmacytoid Dendritic Cell	prostate cancer	3.87222e-13	0.0203668	59.6679
rs29221	G	C	G	C	0.3186	0.0051	0.1555	0.2569	6	29589124	0.0094	0.585	140254	61106	outcome	2872	4.83281e-15	6	0.04046	29589124	HLA DR on plasmacytoid Dendritic Cell	prostate cancer	1.48117e-14	0.0266595	78.6083
rs62176112	A	G	A	G	-0.659	-0.0429	0.0144	0.0681	2	179315726	0.0214	0.0452199	140254	61106	outcome	2872	3.40001e-08	2	0.1191	179315726	HLA DR on plasmacytoid Dendritic Cell	prostate cancer	2.184e-07	0.0123272	35.8206
rs7204799	G	C	G	C	0.5416	0.0015	0.9713	0.9341	16	11004549	0.0185	0.9356	140254	61106	outcome	2872	4.00405e-11	16	0.0817	11004549	HLA DR on plasmacytoid Dendritic Cell	prostate cancer	6.44232e-11	0.0163539	47.7162
rs7748976	A	G	A	G	0.2325	0.011	0.1367	0.2698	6	33890451	0.0096	0.2549	140254	61106	outcome	2872	1.28301e-08	6	0.04076	33890451	HLA DR on plasmacytoid Dendritic Cell	prostate cancer	4.42902e-08	0.0127587	37.0907
rs9267650	T	A	T	A	-0.3903	-0.006	0.2883	0.0453	6	31824912	0.0191	0.752	140254	61106	outcome	2872	7.30634e-26	6	0.03676	31824912	HLA DR on plasmacytoid Dendritic Cell	prostate cancer	2.56817e-25	0.0625128	191.375
rs9296042	T	C	T	C	-0.294	-0.0033	0.5014	0.4135	6	32736005	0.0081	0.6849	140254	61106	outcome	2872	8.65167e-22	6	0.03041	32736005	HLA DR on plasmacytoid Dendritic Cell	prostate cancer	3.08123e-21	0.0432177	129.637
rs72635970	G	T	G	T	-0.3399	0.018	0.0444	0.012	2	73868977	0.0473	0.704001	140254	61106	outcome	2	73868977	3.01301e-08	0.06121	3657	Naive-mature B cell %B cell	prostate cancer	6.198e-08	0.00980373	36.1874
rs115805162	T	C	T	C	-0.3094	-0.0042	0.2083	0.0657	1	161410253	0.0172	0.8093	140254	61106	outcome	1	161410253	2.47116e-20	0.03328	3387	CD62L- CD86+ myeloid Dendritic Cell Absolute Count	prostate cancer	8.29749e-20	0.0315733	110.36
rs191217950	A	G	A	G	0.7724	0.0406	0.0096	0.0139	1	160940671	0.0374	0.277	140254	61106	outcome	1	160940671	3.62301e-09	0.1306	3387	CD62L- CD86+ myeloid Dendritic Cell Absolute Count	prostate cancer	1.45613e-08	0.0113448	38.8428
rs3933769	G	A	G	A	-0.1927	0.0046	0.6134	0.7568	1	161559327	0.0111	0.6742	140254	61106	outcome	1	161559327	1.14789e-11	0.0283	3387	CD62L- CD86+ myeloid Dendritic Cell Absolute Count	prostate cancer	2.95832e-11	0.0176116	60.684
rs71632979	G	A	G	A	0.9207	-0.0188	0.2449	0.1189	1	161526397	0.0135	0.1661	140254	61106	outcome	1	161526397	1e-200	0.02691	3387	CD62L- CD86+ myeloid Dendritic Cell Absolute Count	prostate cancer	3.22819e-223	0.313516	1545.92
rs71639910	A	G	A	G	0.425	-0.014	0.0686	0.0287	1	161937774	0.0254	0.5806	140254	61106	outcome	1	161937774	3.95913e-16	0.05195	3387	CD62L- CD86+ myeloid Dendritic Cell Absolute Count	prostate cancer	1.56378e-15	0.0230817	79.9777
rs75072970	C	T	C	T	0.4485	-0.0113	0.0531	0.0425	1	161058351	0.0216	0.6026	140254	61106	outcome	1	161058351	2.73275e-14	0.05868	3387	CD62L- CD86+ myeloid Dendritic Cell Absolute Count	prostate cancer	9.36167e-14	0.020228	69.8855
rs62395272	T	C	T	C	-0.2295	-0.0078	0.2819	0.0949	6	31394424	0.0135	0.5622	140254	61106	outcome	6	31394424	3.90598e-10	0.03657	3595	HLA DR++ monocyte %monocyte	prostate cancer	1.10568e-09	0.0213243	78.2877
rs9271281	T	C	T	C	-0.3029	-0.0233	0.5808	0.3954	6	32581059	0.0083	0.00479204	140254	61106	outcome	6	32581059	5.37155e-23	0.03046	3595	HLA DR++ monocyte %monocyte	prostate cancer	1.06085e-20	0.0446762	168.029
rs9296042	T	C	T	C	-0.1923	-0.0033	0.5013	0.4135	6	32736005	0.0081	0.6849	140254	61106	outcome	6	32736005	5.86138e-11	0.02928	3595	HLA DR++ monocyte %monocyte	prostate cancer	1.48493e-10	0.0184895	67.6843
rs113435341	G	A	G	A	-2.018	-0.0424	0.0032	0.0194	1	198151688	0.0318	0.1815	140254	61106	outcome	1	198151688	1.46791e-18	0.2282	3405	Activated & secreting CD4 regulatory T cell Absolute Count	prostate cancer	1.92566e-17	0.0259795	90.7662
rs11579717	A	G	A	G	-1.179	0.011	0.0044	0.0434	1	199999121	0.0222	0.62	140254	61106	outcome	1	199999121	1.17501e-09	0.1933	3405	Activated & secreting CD4 regulatory T cell Absolute Count	prostate cancer	2.87449e-09	0.0121785	41.9545
rs138915779	A	C	A	C	-1.518	0.0528	0.0034	0.0162	1	190079170	0.035	0.1315	140254	61106	outcome	1	190079170	1.67302e-10	0.2369	3405	Activated & secreting CD4 regulatory T cell Absolute Count	prostate cancer	1.15988e-09	0.0156161	53.9847
rs61839660	T	C	T	C	0.3316	-0.0205	0.0542	0.0865	10	6094697	0.0143	0.1509	140254	61106	outcome	10	6094697	7.93305e-09	0.05733	3405	Activated & secreting CD4 regulatory T cell Absolute Count	prostate cancer	4.14908e-08	0.0112735	38.801
rs10905719	A	G	A	G	0.1841	0.0172	0.2082	0.3151	10	6115171	0.0085	0.0425804	140254	61106	outcome	10	6115171	7.05797e-09	0.03172	3437	CD25++ CD45RA+ CD4 not regulatory T cell %CD4+ T cell	prostate cancer	6.26226e-08	0.0111746	38.8187
rs11124653	A	C	A	C	-0.2138	-0.0004	0.5911	0.6084	2	39112166	0.0083	0.9624	140254	61106	outcome	2	39112166	5.22878e-16	0.02624	3437	CD25++ CD45RA+ CD4 not regulatory T cell %CD4+ T cell	prostate cancer	1.09612e-15	0.0220965	77.6165
rs116517602	T	C	T	C	1.941	-0.0148	0.0041	0.012	1	198922068	0.0421	0.725301	140254	61106	outcome	1	198922068	4.75554e-24	0.1905	3437	CD25++ CD45RA+ CD4 not regulatory T cell %CD4+ T cell	prostate cancer	2.26574e-23	0.0307667	109.038
rs61836370	G	A	G	A	0.6318	-0.012	0.0145	0.051	1	188691469	0.0224	0.5905	140254	61106	outcome	1	188691469	4.41896e-09	0.1074	3437	CD25++ CD45RA+ CD4 not regulatory T cell %CD4+ T cell	prostate cancer	1.07417e-08	0.0114081	39.6391
rs3865444	A	C	A	C	-0.3767	0.0143	0.2131	0.3273	19	51727962	0.0086	0.0949992	140254	61106	outcome	19	51727962	2.12618e-21	0.03917	1858	CD33+ HLA DR+ CD14- Absolute Count	prostate cancer	1.63343e-20	0.0475909	92.7425
rs3865444	A	C	A	C	-0.3278	0.0143	0.2131	0.3273	19	51727962	0.0086	0.0949992	140254	61106	outcome	19	51727962	1.08493e-16	0.03915	1858	CD33+ HLA DR+ CD14dim Absolute Count	prostate cancer	6.78108e-16	0.0360372	69.3855
rs74253876	T	C	T	C	-0.2252	-0.0113	0.2177	0.1595	18	5858361	0.0118	0.3381	140254	61106	outcome	18	5858361	1.45001e-08	0.03955	1858	CD33+ HLA DR+ CD14dim Absolute Count	prostate cancer	3.21145e-08	0.0172742	32.6245
rs1801274	G	A	G	A	0.5511	-0.0078	0.3334	0.5082	1	161479745	0.0082	0.3417	140254	61106	outcome	1	161479745	2.76822e-54	0.03437	1858	CD33dim HLA DR+ CD11b+ %CD33dim HLA DR+	prostate cancer	5.54019e-54	0.134996	289.655
rs3820097	A	G	A	G	-0.4313	0.0043	0.9459	0.8912	1	161049358	0.0142	0.7634	140254	61106	outcome	1	161049358	7.10608e-09	0.07416	1858	CD33dim HLA DR+ CD11b+ %CD33dim HLA DR+	prostate cancer	1.03944e-08	0.0190384	36.0211
rs3826007	T	C	T	C	0.361	-0.0171	0.2209	0.2498	15	80263217	0.0095	0.0721905	140254	61106	outcome	15	80263217	7.44218e-19	0.04027	1858	CD33dim HLA DR+ CD11b+ %CD33dim HLA DR+	prostate cancer	5.88786e-18	0.0448573	87.1652
rs12712610	G	A	G	A	-0.1632	-0.0188	0.2969	0.1786	2	38897249	0.0113	0.0953301	140254	61106	outcome	2	38897249	7.82492e-10	0.02646	3427	CD45RA- CD4+ T cell %T cell	prostate cancer	5.71413e-09	0.0111198	38.5136
rs146620586	T	G	T	G	-1.991	-0.0372	0.0032	0.0173	1	198524264	0.0373	0.3183	140254	61106	outcome	1	198524264	1.77992e-13	0.2693	3427	CD45RA- CD4+ T cell %T cell	prostate cancer	1.00151e-12	0.0252889	88.8618
rs12874404	G	A	G	A	-0.2201	-0.0188	0.3195	0.0595	13	108993494	0.0193	0.3308	140254	61106	outcome	13	108993494	1.43186e-16	0.02651	3653	T/B cell	prostate cancer	1.10384e-15	0.0210654	78.5647
rs9892810	C	T	C	T	0.1572	0.0015	0.597	0.6265	17	2716155	0.0085	0.8639	140254	61106	outcome	17	2716155	2.18198e-10	0.02469	3653	T/B cell	prostate cancer	4.23407e-10	0.0118909	43.9361
rs78268116	T	C	T	C	-0.3964	0.0079	0.1097	0.0337	11	112705025	0.0241	0.743201	140254	61106	outcome	11	112705025	4.6505e-24	0.0389	3652	CD8+ Natural Killer T Absolute Count	prostate cancer	2.29147e-23	0.0306931	115.577
rs9269109	C	T	C	T	0.1671	-0.0305	0.3642	0.6613	6	32443266	0.0084	0.000270097	140254	61106	outcome	6	32443266	3.31398e-08	0.03018	3652	CD8+ Natural Killer T Absolute Count	prostate cancer	1.06317e-06	0.0129313	47.8177
rs115805162	T	C	T	C	0.2631	-0.0042	0.2074	0.0657	1	161410253	0.0172	0.8093	140254	61106	outcome	1	161410253	8.31764e-17	0.03144	3580	HLA DR+ Natural Killer Absolute Count	prostate cancer	2.46001e-16	0.022758	83.3245
rs71632989	G	T	G	T	-0.6984	-0.0188	0.2473	0.1189	1	161533055	0.0135	0.1648	140254	61106	outcome	1	161533055	2.05116e-136	0.02689	3580	HLA DR+ Natural Killer Absolute Count	prostate cancer	1.75153e-134	0.181587	793.875
rs71639910	A	G	A	G	-0.3019	-0.014	0.0686	0.0287	1	161937774	0.0254	0.5806	140254	61106	outcome	1	161937774	1.153e-09	0.04947	3580	HLA DR+ Natural Killer Absolute Count	prostate cancer	3.06357e-09	0.0116471	42.1643
rs10736092	G	A	G	A	1.01	0.0045	0.469	0.5424	10	97570315	0.0081	0.575999	140254	61106	outcome	10	97570315	1e-200	0.01914	3440	CD39+ CD8+ T cell %T cell	prostate cancer	0	0.508089	3551.07
rs117648214	T	C	T	C	1.27	-0.0943	0.0029	0.012	10	98816434	0.048	0.0494094	140254	61106	outcome	10	98816434	2.14398e-08	0.2262	3440	CD39+ CD8+ T cell %T cell	prostate cancer	1.66009e-07	0.00932769	32.3705
rs11818051	T	C	T	C	0.6769	0.029	0.0317	0.0119	10	97972294	0.0429	0.4987	140254	61106	outcome	10	97972294	9.34545e-20	0.07397	3440	CD39+ CD8+ T cell %T cell	prostate cancer	5.64867e-19	0.0281286	99.5051
rs12777195	G	A	G	A	0.2205	-0.012	0.3594	0.3923	10	96998743	0.0083	0.1469	140254	61106	outcome	10	96998743	9.09704e-16	0.0273	3440	CD39+ CD8+ T cell %T cell	prostate cancer	1.07585e-14	0.0223878	78.732
rs12778618	C	T	C	T	0.8332	0.1223	0.0462	0.0151	10	95633120	0.0395	0.001942	140254	61106	outcome	10	95633120	1.22687e-41	0.06081	3440	CD39+ CD8+ T cell %T cell	prostate cancer	2.82816e-38	0.0611826	224.054
rs17111341	C	T	C	T	0.6237	0.0695	0.0667	0.0188	10	97881031	0.0316	0.0276802	140254	61106	outcome	10	97881031	9.80167e-33	0.0518	3440	CD39+ CD8+ T cell %T cell	prostate cancer	1.82946e-30	0.0484316	174.982
rs72812685	A	G	A	G	0.6459	-0.0101	0.0483	0.0631	10	95845989	0.018	0.5739	140254	61106	outcome	10	95845989	1.13188e-27	0.05873	3440	CD39+ CD8+ T cell %T cell	prostate cancer	8.71356e-27	0.0383537	137.119
rs111283043	C	A	C	A	4.463	-0.0553	0.0001	0.0066	16	79205197	0.0556	0.3196	140254	61106	outcome	16	79205197	1.90498e-08	0.7922	3440	CD28+ CD45RA+ CD8+ T cell %T cell	prostate cancer	6.56342e-08	0.00398328	13.7493
rs112258643	T	C	T	C	3.436	-0.0244	0.0001	0.0178	12	55672838	0.0358	0.4957	140254	61106	outcome	12	55672838	1.25401e-08	0.6021	3440	CD28+ CD45RA+ CD8+ T cell %T cell	prostate cancer	3.33382e-08	0.00236098	8.13627
rs112571466	G	A	G	A	3.787	-0.0259	0.0001	0.0106	7	111704231	0.0483	0.5925	140254	61106	outcome	7	111704231	2.43602e-08	0.6773	3440	CD28+ CD45RA+ CD8+ T cell %T cell	prostate cancer	5.57359e-08	0.00286799	9.8885
rs113447229	C	T	C	T	4.765	0.0107	0.0001	0.0167	9	105346840	0.0327	0.7431	140254	61106	outcome	9	105346840	1.91801e-08	0.8459	3440	CD28+ CD45RA+ CD8+ T cell %T cell	prostate cancer	3.6847e-08	0.00454059	15.6818
rs115077170	G	T	G	T	7.992	0.0363		0.0138	2	53872294	0.0358	0.3106	140254	61106	outcome	2	53872294	1.36801e-08	1.404	3440	CD28+ CD45RA+ CD8+ T cell %T cell	prostate cancer	4.83204e-08
rs115218435	G	T	G	T	4.272	-0.0602	0.0001	0.011	4	67836131	0.0422	0.154	140254	61106	outcome	4	67836131	1.60299e-08	0.7543	3440	CD28+ CD45RA+ CD8+ T cell %T cell	prostate cancer	8.08243e-08	0.00364963	12.5934
rs116562707	G	A	G	A	0.4024	-0.0114	0.0192	0.037	6	31360602	0.0217	0.6003	140254	61106	outcome	6	31360602	3.96899e-09	0.06819	3440	CD28+ CD45RA+ CD8+ T cell %T cell	prostate cancer	9.56544e-09	0.00609856	21.0955
rs116767883	T	C	T	C	9.1	0.0121		0.0091	6	24745313	0.0478	0.8001	140254	61106	outcome	6	24745313	9.87711e-09	1.583	3440	CD28+ CD45RA+ CD8+ T cell %T cell	prostate cancer	1.79818e-08
rs116984539	T	C	T	C	8.74	0.0007		0.0082	13	22348885	0.0479	0.9886	140254	61106	outcome	13	22348885	1.83e-08	1.55	3440	CD28+ CD45RA+ CD8+ T cell %T cell	prostate cancer	2.70948e-08
rs117475733	T	C	T	C	1.818	0.0169	0.0004	0.0206	6	148775706	0.0309	0.5831	140254	61106	outcome	6	148775706	1.17101e-09	0.2979	3440	CD28+ CD45RA+ CD8+ T cell %T cell	prostate cancer	2.97461e-09	0.00264304	9.11086
rs117494082	A	G	A	G	3.894	0.079	0.0001	0.011	14	56862154	0.0451	0.0798896	140254	61106	outcome	14	56862154	1.935e-08	0.6914	3440	CD28+ CD45RA+ CD8+ T cell %T cell	prostate cancer	1.26363e-07	0.00303234	10.4569
rs117927481	A	G	A	G	3.783	-0.0522	0.0001	0.0112	12	49315200	0.0414	0.2071	140254	61106	outcome	12	49315200	1.62701e-08	0.6683	3440	CD28+ CD45RA+ CD8+ T cell %T cell	prostate cancer	7.12254e-08	0.00286193	9.86756
rs118016388	C	T	C	T	7.82	-0.0255		0.0225	12	28662288	0.0301	0.396	140254	61106	outcome	12	28662288	4.26904e-08	1.424	3440	CD28+ CD45RA+ CD8+ T cell %T cell	prostate cancer	1.25168e-07
rs12755474	G	A	G	A	6.643	0.0237	0.0001	0.0077	1	216352525	0.0555	0.670199	140254	61106	outcome	1	216352525	3.21603e-08	1.199	3440	CD28+ CD45RA+ CD8+ T cell %T cell	prostate cancer	6.70754e-08	0.00882501	30.6105
rs137858581	C	T	C	T	3.974	-0.0165	0.0001	0.0119	5	173002007	0.0456	0.7181	140254	61106	outcome	5	173002007	4.54098e-08	0.7251	3440	CD28+ CD45RA+ CD8+ T cell %T cell	prostate cancer	8.79172e-08	0.00315822	10.8924
rs142208889	T	C	T	C	3.814	-0.0042	0.0001	0.0156	19	51829114	0.0349	0.9046	140254	61106	outcome	19	51829114	8.681e-09	0.6612	3440	CD28+ CD45RA+ CD8+ T cell %T cell	prostate cancer	1.42546e-08	0.00290903	10.0304
rs142967914	C	G	C	G	3.794	-0.0045	0.0001	0.015	9	12800264	0.0369	0.9034	140254	61106	outcome	9	12800264	1.438e-08	0.6676	3440	CD28+ CD45RA+ CD8+ T cell %T cell	prostate cancer	2.32047e-08	0.0028786	9.9252
rs143498795	A	C	A	C	3.717	-0.0301	0.0001	0.0146	8	140342260	0.0416	0.4682	140254	61106	outcome	8	140342260	3.11301e-08	0.67	3440	CD28+ CD45RA+ CD8+ T cell %T cell	prostate cancer	8.31472e-08	0.00276294	9.52531
rs144591335	G	A	G	A	3.946	-0.0798	0.0001	0.0096	16	59010741	0.0493	0.1057	140254	61106	outcome	16	59010741	1.59698e-08	0.6967	3440	CD28+ CD45RA+ CD8+ T cell %T cell	prostate cancer	9.50849e-08	0.00311387	10.7389
rs145827119	T	C	T	C	4.893	0.0041	0.0001	0.0144	20	57132122	0.0408	0.9193	140254	61106	outcome	20	57132122	5.91494e-09	0.8386	3440	CD28+ CD45RA+ CD8+ T cell %T cell	prostate cancer	9.54236e-09	0.00478781	16.5397
rs146073003	T	C	T	C	7.599	0.0477		0.0104	17	11512358	0.0517	0.3561	140254	61106	outcome	17	11512358	1.799e-08	1.346	3440	CD28+ CD45RA+ CD8+ T cell %T cell	prostate cancer	5.77601e-08
rs146985291	G	A	G	A	6.493	0.03	0.0001	0.0119	3	170169608	0.0419	0.4739	140254	61106	outcome	3	170169608	8.688e-09	1.126	3440	CD28+ CD45RA+ CD8+ T cell %T cell	prostate cancer	2.45631e-08	0.00843097	29.2321
rs149926070	A	G	A	G	3.533	0.0725	0.0001	0.0105	21	41143748	0.0516	0.16	140254	61106	outcome	21	41143748	3.11602e-08	0.6368	3440	CD28+ CD45RA+ CD8+ T cell %T cell	prostate cancer	1.47983e-07	0.00249617	8.6033
rs182236332	G	A	G	A	4.848	-0.0241	0.0001	0.0113	7	124954943	0.0508	0.6348	140254	61106	outcome	7	124954943	2.34202e-09	0.8097	3440	CD28+ CD45RA+ CD8+ T cell %T cell	prostate cancer	5.51302e-09	0.00470015	16.2354
rs184082746	C	T	C	T	4.025	0.0526	0.0001	0.0103	7	92791863	0.0466	0.2584	140254	61106	outcome	7	92791863	3.58897e-10	0.6399	3440	CD28+ CD45RA+ CD8+ T cell %T cell	prostate cancer	1.67002e-09	0.0032398	11.1746
rs188748536	C	T	C	T	13.7	0.0403		0.0158	19	8271140	0.037	0.2769	140254	61106	outcome	19	8271140	5.05999e-10	2.197	3440	CD28+ CD45RA+ CD8+ T cell %T cell	prostate cancer	2.23354e-09
rs189717624	C	T	C	T	8.206	-0.0603		0.0161	8	33736052	0.0403	0.1343	140254	61106	outcome	8	33736052	1.73101e-08	1.452	3440	CD28+ CD45RA+ CD8+ T cell %T cell	prostate cancer	9.15822e-08
rs189801254	A	C	A	C	4.11	-0.0173	0.0001	0.0135	10	68336237	0.036	0.6313	140254	61106	outcome	10	68336237	1.59901e-08	0.7256	3440	CD28+ CD45RA+ CD8+ T cell %T cell	prostate cancer	3.54134e-08	0.00337808	11.6532
rs192475369	T	A	T	A	5.704	0.0351	0.0001	0.0178	9	33552507	0.036	0.3294	140254	61106	outcome	9	33552507	1.34602e-08	1.002	3440	CD28+ CD45RA+ CD8+ T cell %T cell	prostate cancer	4.66282e-08	0.00650647	22.5158
rs58471414	G	T	G	T	3.833	0.0034	0.0001	0.0248	14	28349764	0.0355	0.9242	140254	61106	outcome	14	28349764	1.62701e-08	0.6771	3440	CD28+ CD45RA+ CD8+ T cell %T cell	prostate cancer	2.56918e-08	0.00293808	10.1309
rs76325389	G	A	G	A	4.877	-0.0261	0.0001	0.0111	9	122676137	0.0524	0.6191	140254	61106	outcome	9	122676137	1.53299e-08	0.8599	3440	CD28+ CD45RA+ CD8+ T cell %T cell	prostate cancer	3.45233e-08	0.00475655	16.4312
rs76604940	C	A	C	A	3.867	0.0173	0.0001	0.0205	4	31397782	0.0295	0.5561	140254	61106	outcome	4	31397782	1.58899e-08	0.6826	3440	CD28+ CD45RA+ CD8+ T cell %T cell	prostate cancer	3.8684e-08	0.00299044	10.312
rs77935824	G	A	G	A	3.755	0.0198	0.0001	0.0082	18	68968361	0.0477	0.6785	140254	61106	outcome	18	68968361	1.71601e-08	0.6644	3440	CD28+ CD45RA+ CD8+ T cell %T cell	prostate cancer	3.58644e-08	0.00281972	9.72162
rs80194890	G	T	G	T	4.68	-0.0132	0.0001	0.0133	10	91332621	0.0412	0.747901	140254	61106	outcome	10	91332621	8.64809e-09	0.8111	3440	CD28+ CD45RA+ CD8+ T cell %T cell	prostate cancer	1.69088e-08	0.00438004	15.1248
rs9592479	C	G	C	G	4.763	-0.0206	0.0001	0.0269	13	67157607	0.0273	0.4514	140254	61106	outcome	13	67157607	1.65101e-08	0.8417	3440	CD28+ CD45RA+ CD8+ T cell %T cell	prostate cancer	4.64109e-08	0.00453678	15.6685
rs113530150	T	C	T	C	-0.3712	-0.0514	0.0742	0.0427	22	40567196	0.0206	0.01278	140254	61106	outcome	22	40567196	4.73042e-14	0.04904	3657	BAFF-R on IgD- CD24- B cell	prostate cancer	1.73078e-12	0.0189307	70.5269
rs118137006	C	A	C	A	-0.7062	0.0481	0.015	0.0135	22	40727723	0.0419	0.2509	140254	61106	outcome	22	40727723	1.57797e-11	0.1044	3657	BAFF-R on IgD- CD24- B cell	prostate cancer	9.1575e-11	0.0147371	54.6699
rs13058590	T	C	T	C	-0.355	0.0113	0.0468	0.0176	22	39641412	0.0341	0.7405	140254	61106	outcome	22	39641412	2.1e-09	0.05912	3657	BAFF-R on IgD- CD24- B cell	prostate cancer	4.49965e-09	0.0112439	41.5638
rs142780018	A	G	A	G	-0.3245	-0.0801	0.0463	0.0134	22	44395926	0.0429	0.0618102	140254	61106	outcome	22	44395926	3.41201e-08	0.05867	3657	BAFF-R on IgD- CD24- B cell	prostate cancer	2.54433e-07	0.00929934	34.3081
rs146069723	T	C	T	C	-0.5779	0.1283	0.0756	0.0153	22	43339331	0.0323	7.26106e-05	140254	61106	outcome	22	43339331	2.81773e-33	0.0476	3657	BAFF-R on IgD- CD24- B cell	prostate cancer	1.80567e-29	0.0466785	178.964
rs150612106	A	G	A	G	-0.7252	-0.0158	0.0261	0.0177	22	40175781	0.0325	0.6273	140254	61106	outcome	22	40175781	2.73716e-20	0.07811	3657	BAFF-R on IgD- CD24- B cell	prostate cancer	1.41218e-19	0.0267362	100.405
rs191405504	T	A	T	A	-0.5316	-0.0357	0.0535	0.0157	22	41305796	0.0389	0.359	140254	61106	outcome	22	41305796	1.2569e-19	0.05831	3657	BAFF-R on IgD- CD24- B cell	prostate cancer	1.15417e-18	0.0286203	107.689
rs4657041	C	T	C	T	-0.1479	-0.0078	0.3344	0.5086	1	161478859	0.0082	0.3437	140254	61106	outcome	1	161478859	4.176e-08	0.02692	3657	BAFF-R on IgD- CD24- B cell	prostate cancer	1.40875e-07	0.00973747	35.9404
rs5758649	T	C	T	C	-0.6004	0.0151	0.0871	0.0275	22	42605548	0.0261	0.5629	140254	61106	outcome	22	42605548	3.89135e-40	0.04473	3657	BAFF-R on IgD- CD24- B cell	prostate cancer	6.29334e-39	0.0573261	222.269
rs73165129	T	C	T	C	-1.427	0.0018	0.099	0.0803	22	42315371	0.0148	0.904	140254	61106	outcome	22	42315371	1e-200	0.03453	3657	BAFF-R on IgD- CD24- B cell	prostate cancer	0	0.363277	2085.33
rs9614288	T	A	T	A	-0.2871	0.0152	0.2346	0.2413	22	44297686	0.0109	0.1634	140254	61106	outcome	22	44297686	1.20005e-22	0.02912	3657	BAFF-R on IgD- CD24- B cell	prostate cancer	2.87833e-21	0.0296014	111.494
rs4657041	C	T	C	T	-0.1739	-0.0078	0.3344	0.5086	1	161478859	0.0082	0.3437	140254	61106	outcome	1	161478859	1.31099e-10	0.02699	3657	BAFF-R on IgD- CD38dim B cell	prostate cancer	5.77775e-10	0.013462	49.8749
rs117705111	A	G	A	G	-0.6734	0.0291	0.0365	0.0315	22	41957510	0.0236	0.2178	140254	61106	outcome	22	41957510	2.03704e-24	0.06556	3655	BAFF-R on transitional B cell	prostate cancer	4.40534e-23	0.0318949	120.351
rs149806587	G	A	G	A	-0.4771	-0.0553	0.0525	0.0118	22	40774205	0.0419	0.1866	140254	61106	outcome	22	40774205	1.72584e-16	0.05763	3655	BAFF-R on transitional B cell	prostate cancer	2.08402e-15	0.0226458	84.6418
rs1894588	T	C	T	C	-0.4832	-0.0178	0.0622	0.0361	22	40629980	0.0225	0.4298	140254	61106	outcome	22	40629980	7.94511e-21	0.05131	3655	BAFF-R on transitional B cell	prostate cancer	6.69383e-20	0.0272386	102.289
rs5757678	T	C	T	C	0.2113	0.0007	0.6419	0.7323	22	39843409	0.0091	0.9399	140254	61106	outcome	22	39843409	5.84386e-16	0.026	3655	BAFF-R on transitional B cell	prostate cancer	1.39607e-15	0.0205258	76.5521
rs5759079	A	G	A	G	-0.4046	0.0295	0.1406	0.0795	22	43393437	0.0148	0.0464505	140254	61106	outcome	22	43393437	1.32404e-28	0.03616	3655	BAFF-R on transitional B cell	prostate cancer	1.48259e-26	0.0395606	150.467
rs73165129	T	C	T	C	-1.385	0.0018	0.099	0.0803	22	42315371	0.0148	0.904	140254	61106	outcome	22	42315371	1e-200	0.03524	3655	BAFF-R on transitional B cell	prostate cancer	4.87536e-291	0.342208	1900.42
rs76146864	T	C	T	C	-0.6664	-0.0253	0.0264	0.022	22	40246055	0.0294	0.3887	140254	61106	outcome	22	40246055	1.93821e-17	0.07803	3655	BAFF-R on transitional B cell	prostate cancer	1.39469e-16	0.0228289	85.3421
rs7189927	C	T	C	T	0.1434	0.0028	0.5982	0.6433	16	28913787	0.0086	0.742	140254	61106	outcome	16	28913787	1.06601e-08	0.025	3657	CD19 on IgD- CD38- B cell	prostate cancer	2.12391e-08	0.00988518	36.4911
rs2066399	A	G	A	G	0.3353	-0.0099	0.821	0.8268	6	15880540	0.0108	0.3559	140254	61106	outcome	6	15880540	1.1311e-25	0.03177	3657	CD20 on IgD+ CD38+ B cell	prostate cancer	1.62286e-24	0.0330441	124.903
rs34486765	A	G	A	G	0.1684	-0.0076	0.3094	0.196	19	49915911	0.0106	0.4737	140254	61106	outcome	19	49915911	1.75102e-10	0.02631	3657	CD20 on IgD+ CD38+ B cell	prostate cancer	5.94179e-10	0.0121188	44.8377
rs72836542	T	C	T	C	0.1494	0.0062	0.3161	0.2799	6	14091682	0.0089	0.4856	140254	61106	outcome	6	14091682	2.45002e-08	0.02674	3657	CD20 on IgD+ CD38+ B cell	prostate cancer	6.80804e-08	0.00965047	35.6162
rs7768875	T	C	T	C	-0.1706	-0.0152	0.461	0.3424	6	32560752	0.0085	0.0761693	140254	61106	outcome	6	32560752	3.046e-08	0.03073	3657	CD20 on IgD+ CD38+ B cell	prostate cancer	2.13398e-07	0.0144636	53.6405
rs7939177	T	C	T	C	-0.1785	0.006	0.6102	0.5387	11	60266070	0.0082	0.4667	140254	61106	outcome	11	60266070	6.72667e-13	0.02475	3657	CD20 on IgD+ CD38+ B cell	prostate cancer	2.83599e-12	0.0151573	56.2524
rs1883832	C	T	C	T	-0.1869	-0.001	0.6318	0.743	20	44746982	0.0093	0.9127	140254	61106	outcome	20	44746982	4.89553e-13	0.02576	3657	CD20 on IgD- CD27- B cell	prostate cancer	1.02183e-12	0.0162522	60.3831
rs4716010	A	G	A	G	0.1924	-0.0052	0.8194	0.8266	6	15898371	0.0107	0.625801	140254	61106	outcome	6	15898371	2.238e-09	0.0321	3657	CD20 on IgD- CD27- B cell	prostate cancer	5.56653e-09	0.010956	40.4879
rs61731791	T	C	T	C	0.2363	-0.0257	0.0972	0.0386	19	50940778	0.0216	0.2344	140254	61106	outcome	19	50940778	2.509e-08	0.04232	3657	CD20 on IgD- CD27- B cell	prostate cancer	1.07156e-07	0.00979976	36.1726
rs11187166	T	C	T	C	0.1757	-0.0139	0.1993	0.1707	10	94516008	0.0109	0.2006	140254	61106	outcome	10	94516008	2.97399e-08	0.03163	3657	CD20 on IgD- CD38dim B cell	prostate cancer	1.34772e-07	0.0098526	36.3696
rs2070770	T	C	T	C	-0.2657	-0.0166	0.0965	0.0733	11	60230531	0.016	0.299	140254	61106	outcome	11	60230531	2.09199e-10	0.0417	3657	CD20 on IgD- CD38dim B cell	prostate cancer	9.80705e-10	0.0123103	45.5549
rs55809481	C	T	C	T	-0.3192	0.0058	0.2425	0.2478	19	49872521	0.0093	0.5316	140254	61106	outcome	19	49872521	9.00949e-29	0.02843	3657	CD20 on IgD- CD38dim B cell	prostate cancer	9.20027e-28	0.0374326	142.137
rs61731791	T	C	T	C	0.2688	-0.0257	0.0972	0.0386	19	50940778	0.0216	0.2344	140254	61106	outcome	19	50940778	1.74502e-10	0.042	3657	CD20 on IgD- CD38dim B cell	prostate cancer	9.59378e-10	0.0126808	46.9436
rs909846	G	T	G	T	0.2058	-0.0077	0.8744	0.9103	6	15897003	0.0146	0.5992	140254	61106	outcome	6	15897003	3.14101e-08	0.03711	3657	CD20 on IgD- CD38dim B cell	prostate cancer	7.35078e-08	0.00930295	34.3216
rs9469053	G	A	G	A	0.2372	-0.0261	0.184	0.0455	6	31755776	0.0195	0.1807	140254	61106	outcome	6	31755776	1.46899e-10	0.03691	3657	CD20 on IgD- CD38dim B cell	prostate cancer	9.45818e-10	0.0168954	62.8138
rs9400058	G	A	G	A	-0.6739	0.0048	0.065	0.0748	6	107164076	0.0161	0.766699	140254	61106	outcome	6	107164076	3.93007e-41	0.04955	3655	CD24 on unswitched memory B cell	prostate cancer	3.61639e-40	0.0552009	213.43
rs72948545	G	A	G	A	-0.7073	-0.0104	0.0586	0.0545	6	107168477	0.0187	0.576901	140254	61106	outcome	6	107168477	1.20809e-40	0.05233	3652	CD24 on switched memory B cell	prostate cancer	1.83191e-39	0.0551962	213.236
rs2275848	T	G	T	G	-0.2187	0.0024	0.7711	0.8049	9	95887320	0.0102	0.8152	140254	61106	outcome	9	95887320	4.80695e-08	0.0399	1835	CD25 on IgD+ CD38- naive B cell	prostate cancer	6.56144e-08	0.0168843	31.4805
rs41294937	C	T	C	T	0.4909	-0.0055	0.1068	0.0487	10	6106621	0.0185	0.767201	140254	61106	outcome	10	6106621	1.66686e-18	0.05533	1835	CD25 on IgD+ CD38- naive B cell	prostate cancer	2.86203e-18	0.0459765	88.3363
rs709589	T	C	T	C	-0.2484	0.0005	0.4529	0.4292	14	106306841	0.0123	0.9698	140254	61106	outcome	14	106306841	1.84302e-08	0.04396	1835	CD25 on IgD+ CD38- naive B cell	prostate cancer	2.24819e-08	0.0305775	57.8165
rs162076	A	G	A	G	-0.1453	-0.0009	0.555	0.5833	20	46785499	0.0084	0.9143	140254	61106	outcome	20	46785499	6.19598e-09	0.02494	3657	CD27 on CD24+ CD27+ B cell	prostate cancer	1.03545e-08	0.0104283	38.5172
rs1801274	G	A	G	A	-0.2208	-0.0078	0.325	0.5082	1	161479745	0.0082	0.3417	140254	61106	outcome	1	161479745	7.07457e-17	0.02632	3657	CD27 on CD24+ CD27+ B cell	prostate cancer	5.37027e-16	0.0213902	79.8901
rs1883832	C	T	C	T	-0.5841	-0.001	0.6318	0.743	20	44746982	0.0093	0.9127	140254	61106	outcome	20	44746982	8.47227e-120	0.02417	3657	CD27 on CD24+ CD27+ B cell	prostate cancer	1.64972e-119	0.158733	689.638
rs25680	A	G	A	G	-0.2616	-0.0109	0.1671	0.2186	12	6554628	0.0108	0.3134	140254	61106	outcome	12	6554628	2.86484e-15	0.03299	3657	CD27 on CD24+ CD27+ B cell	prostate cancer	2.10266e-14	0.0190491	70.9766
rs35574803	C	T	C	T	0.7589	0.0389	0.0562	0.0222	3	32533246	0.0298	0.192	140254	61106	outcome	3	32533246	3.63413e-46	0.05246	3657	CD27 on CD24+ CD27+ B cell	prostate cancer	3.69176e-44	0.0610964	237.838
rs6011967	C	T	C	T	0.2439	0	0.118	0.0673	20	45095161	0.0173	0.9982	140254	61106	outcome	20	45095161	4.71498e-10	0.03905	3657	CD27 on CD24+ CD27+ B cell	prostate cancer	7.54221e-10	0.0123824	45.825
rs75918255	A	G	A	G	0.5011	-0.0097	0.035	0.0232	3	32945761	0.0332	0.769501	140254	61106	outcome	3	32945761	1.07103e-13	0.06717	3657	CD27 on CD24+ CD27+ B cell	prostate cancer	2.905e-13	0.0169619	63.0654
rs7621492	A	G	A	G	0.2196	0.0241	0.1136	0.0463	3	32302456	0.0223	0.281	140254	61106	outcome	3	32302456	2.66803e-08	0.03939	3657	CD27 on CD24+ CD27+ B cell	prostate cancer	1.0204e-07	0.00971187	35.845
rs162076	A	G	A	G	-0.1634	-0.0009	0.555	0.5833	20	46785499	0.0084	0.9143	140254	61106	outcome	20	46785499	5.02805e-11	0.02479	3657	CD27 on IgD- CD38dim B cell	prostate cancer	9.39606e-11	0.0131882	48.8473
rs1801274	G	A	G	A	-0.2036	-0.0078	0.325	0.5082	1	161479745	0.0082	0.3417	140254	61106	outcome	1	161479745	1.14288e-14	0.02626	3657	CD27 on IgD- CD38dim B cell	prostate cancer	7.39142e-14	0.0181875	67.7067
rs1883832	C	T	C	T	-0.6404	-0.001	0.6318	0.743	20	44746982	0.0093	0.9127	140254	61106	outcome	20	44746982	6.20869e-147	0.02368	3657	CD27 on IgD- CD38dim B cell	prostate cancer	1.92473e-147	0.190808	861.85
rs2253610	A	G	A	G	-0.1829	-0.0063	0.5782	0.5045	12	6557674	0.0092	0.493	140254	61106	outcome	12	6557674	1.50904e-13	0.02466	3657	CD27 on IgD- CD38dim B cell	prostate cancer	6.30406e-13	0.0163171	60.6281
rs35574803	C	T	C	T	0.6579	0.0389	0.0562	0.0222	3	32533246	0.0298	0.192	140254	61106	outcome	3	32533246	3.41822e-35	0.05259	3657	CD27 on IgD- CD38dim B cell	prostate cancer	1.84821e-33	0.0459162	175.9
rs6011967	C	T	C	T	0.2509	0	0.118	0.0673	20	45095161	0.0173	0.9982	140254	61106	outcome	20	45095161	1.236e-10	0.03888	3657	CD27 on IgD- CD38dim B cell	prostate cancer	2.04627e-10	0.0131033	48.5286
rs75918255	A	G	A	G	0.4177	-0.0097	0.035	0.0232	3	32945761	0.0332	0.769501	140254	61106	outcome	3	32945761	4.84395e-10	0.06693	3657	CD27 on IgD- CD38dim B cell	prostate cancer	1.04214e-09	0.0117857	43.5904
rs10272514	T	A	T	A	0.1547	0.0103	0.3924	0.3544	7	40012831	0.0085	0.2256	140254	61106	outcome	7	40012831	9.94306e-10	0.02525	3656	IgD on IgD+ CD38dim B cell	prostate cancer	5.08796e-09	0.0114119	42.1804
rs28669075	T	C	T	C	-0.2111	0.0127	0.4075	0.431	15	40856521	0.0081	0.1148	140254	61106	outcome	15	40856521	5.47394e-17	0.02508	3656	IgD on IgD+ CD38dim B cell	prostate cancer	9.59086e-16	0.021519	80.3598
rs28723652	A	C	A	C	0.4141	-0.0065	0.0442	0.0778	14	106644507	0.0252	0.7962	140254	61106	outcome	14	106644507	1.892e-08	0.07351	3656	IgD on IgD+ CD38dim B cell	prostate cancer	3.55964e-08	0.0144887	53.7201
rs35501848	T	G	T	G	-0.1647	-0.0055	0.4878	0.3432	17	62021003	0.0085	0.5188	140254	61106	outcome	17	62021003	5.72532e-11	0.02506	3656	IgD on IgD+ CD38dim B cell	prostate cancer	1.87094e-10	0.013555	50.2105
rs709589	T	C	T	C	-0.6238	0.0005	0.4557	0.4292	14	106306841	0.0123	0.9698	140254	61106	outcome	14	106306841	9.24698e-90	0.03019	3656	IgD on IgD+ CD38dim B cell	prostate cancer	4.36249e-89	0.193036	874.083
rs1723018	G	A	G	A	0.4384	0.0105	0.4556	0.378	1	167433420	0.0083	0.206	140254	61106	outcome	1	167433420	1.01391e-61	0.02585	3060	CD3 on HLA DR+ CD4+ T cell	prostate cancer	5.33141e-60	0.0953395	322.274
rs59738549	G	C	G	C	0.3869	0.0021	0.0505	0.0234	10	116394226	0.0272	0.9379	140254	61106	outcome	10	116394226	2.38402e-10	0.06088	3060	CD3 on HLA DR+ CD4+ T cell	prostate cancer	3.82719e-10	0.0143554	44.538
rs1723018	G	A	G	A	0.3668	0.0105	0.4567	0.378	1	167433420	0.0083	0.206	140254	61106	outcome	1	167433420	7.24937e-43	0.0263	2919	CD3 on CD28+ CD45RA- CD8+ T cell	prostate cancer	2.2817e-41	0.0667666	208.692
rs2949670	T	A	T	A	0.2329	-0.0014	0.864	0.8898	1	167406513	0.0132	0.9127	140254	61106	outcome	1	167406513	4.03497e-09	0.03947	2919	CD3 on CD28+ CD45RA- CD8+ T cell	prostate cancer	6.15133e-09	0.0127474	37.6643
rs62028293	C	T	C	T	0.2839	-0.0943	0.0735	0.0136	16	50264054	0.0372	0.0113399	140254	61106	outcome	16	50264054	3.92401e-08	0.05153	2919	CD3 on CD28+ CD45RA- CD8+ T cell	prostate cancer	3.75657e-07	0.0109772	32.376
rs6684311	G	C	G	C	-0.2394	0.0107	0.1439	0.2349	1	166485891	0.0097	0.2709	140254	61106	outcome	1	166485891	3.63999e-10	0.03806	2919	CD3 on CD28+ CD45RA- CD8+ T cell	prostate cancer	1.41997e-09	0.0141209	41.7808
rs11214436	T	G	T	G	0.2713	-0.0072	0.3055	0.4055	11	112830782	0.0083	0.3831	140254	61106	outcome	11	112830782	7.04855e-21	0.02873	3113	CD16-CD56 on Natural Killer T	prostate cancer	4.87324e-20	0.031233	100.298
rs117147408	G	A	G	A	0.6523	0.0222	0.0276	0.0233	6	101980039	0.0304	0.465799	140254	61106	outcome	6	101980039	3.02691e-15	0.08226	3113	CD16-CD56 on Natural Killer T	prostate cancer	1.27552e-14	0.0228391	72.7131
rs77738700	A	G	A	G	-0.7478	-0.0034	0.1066	0.0318	11	112751407	0.0261	0.8964	140254	61106	outcome	11	112751407	9.38642e-71	0.04098	3113	CD16-CD56 on Natural Killer T	prostate cancer	2.9664e-70	0.106513	370.865
rs79251210	A	G	A	G	0.4508	-0.0303	0.0385	0.0346	6	100468602	0.0231	0.19	140254	61106	outcome	6	100468602	1.49101e-10	0.07013	3113	CD16-CD56 on Natural Killer T	prostate cancer	7.76041e-10	0.0150455	47.5217
rs9488834	A	G	A	G	0.4911	-0.0002	0.0458	0.0192	6	97889936	0.031	0.9954	140254	61106	outcome	6	97889936	3.1153e-14	0.06437	3113	CD16-CD56 on Natural Killer T	prostate cancer	5.45135e-14	0.0210802	66.9927
rs56209416	C	T	C	T	-0.3545	0.0083	0.1976	0.1688	2	204627500	0.011	0.4511	140254	61106	outcome	2	204627500	1.67803e-27	0.0323	2920	CD28 on CD4 regulatory T cell	prostate cancer	1.26388e-26	0.0398511	121.112
rs2228015	C	T	C	T	0.683	0.0357	0.0407	0.0357	17	38715186	0.0231	0.1234	140254	61106	outcome	17	38715186	3.72392e-23	0.06832	2910	CCR7 on naive CD4+ T cell	prostate cancer	6.7573e-22	0.0364267	109.933
rs5020353	G	A	G	A	-0.2745	0.0106	0.3258	0.5438	16	423423	0.0085	0.2092	140254	61106	outcome	16	423423	1.64702e-21	0.02859	2910	CCR7 on naive CD4+ T cell	prostate cancer	1.78555e-20	0.033102	99.5562
rs61968809	A	G	A	G	0.2565	-0.0173	0.0979	0.0851	13	106399307	0.0151	0.2502	140254	61106	outcome	13	106399307	4.35702e-08	0.04671	2910	CCR7 on naive CD4+ T cell	prostate cancer	1.42694e-07	0.011621	34.1911
rs75983909	T	C	T	C	0.5993	-0.0493	0.017	0.0217	17	38723925	0.0312	0.114	140254	61106	outcome	17	38723925	2.09498e-08	0.1066	2910	CCR7 on naive CD4+ T cell	prostate cancer	9.90679e-08	0.0120039	35.3313
rs12924236	C	G	C	G	0.2877	-0.0016	0.2263	0.2382	16	10974423	0.01	0.869	140254	61106	outcome	16	10974423	4.55407e-20	0.03115	3060	CD45 on HLA DR+ T cell	prostate cancer	1.18903e-19	0.0289846	91.2805
rs2092305	G	A	G	A	-0.182	0.0126	0.265	0.1287	6	33100189	0.0117	0.2811	140254	61106	outcome	6	33100189	1.00201e-08	0.03168	3060	CD45 on HLA DR+ CD4+ T cell	prostate cancer	3.48869e-08	0.0129035	39.9746
rs72770017	A	G	A	G	-0.1919	0.001	0.7709	0.7367	16	10973612	0.0096	0.9132	140254	61106	outcome	16	10973612	6.18102e-10	0.03092	3060	CD45 on HLA DR+ CD4+ T cell	prostate cancer	9.91618e-10	0.0130078	40.302
rs181516190	A	T	A	T	0.4995	-0.03	0.0223	0.0106	7	35264731	0.0419	0.4739	140254	61106	outcome	7	35264731	8.29908e-09	0.08646	3435	CD25 on CD45RA- CD4 not regulatory T cell	prostate cancer	2.30855e-08	0.0108796	37.7604
rs61839660	T	C	T	C	0.6113	-0.0205	0.0544	0.0865	10	6094697	0.0143	0.1509	140254	61106	outcome	10	6094697	6.69576e-28	0.05534	3435	CD25 on CD45RA- CD4 not regulatory T cell	prostate cancer	2.23747e-26	0.0384455	137.26
rs3865444	A	C	A	C	-1.219	0.0143	0.1938	0.3273	19	51727962	0.0086	0.0949992	140254	61106	outcome	19	51727962	2.80543e-187	0.03627	1579	CD33 on CD33+ HLA DR+	prostate cancer	7.71258e-200	0.464338	1367.02
rs58301181	G	C	G	C	-0.4318	0.0086	0.0842	0.106	19	52097261	0.0148	0.562501	140254	61106	outcome	19	52097261	1.937e-10	0.06738	1579	CD33 on CD33+ HLA DR+	prostate cancer	3.33991e-10	0.0287546	46.6886
rs62114147	T	C	T	C	0.2943	0.0065	0.5567	0.5259	19	51588018	0.0085	0.4432	140254	61106	outcome	19	51588018	3.03669e-15	0.03693	1579	CD33 on CD33+ HLA DR+	prostate cancer	6.73412e-15	0.0427493	70.4264
rs7351079	G	A	G	A	-0.3366	0.0124	0.2619	0.1731	19	51574038	0.0106	0.2408	140254	61106	outcome	19	51574038	2.53805e-15	0.04212	1579	CD33 on CD33+ HLA DR+	prostate cancer	7.94663e-15	0.0438035	72.2426
rs115805162	T	C	T	C	0.3636	-0.0042	0.2109	0.0657	1	161410253	0.0172	0.8093	140254	61106	outcome	1	161410253	1.83696e-31	0.03087	3620	CD16 on CD14- CD16+ monocyte	prostate cancer	1.09531e-30	0.0440034	166.532
rs148765873	C	T	C	T	0.3526	0.0228	0.0453	0.0111	1	161221713	0.0409	0.5765	140254	61106	outcome	1	161221713	1.93901e-08	0.06263	3620	CD16 on CD14- CD16+ monocyte	prostate cancer	4.72322e-08	0.0107537	39.33
rs187197560	T	C	T	C	-0.5612	-0.0428	0.03	0.0105	1	161006723	0.0579	0.4605	140254	61106	outcome	1	161006723	3.47696e-13	0.07687	3620	CD16 on CD14- CD16+ monocyte	prostate cancer	1.5217e-12	0.0183298	67.5556
rs347311	C	G	C	G	-0.1947	-0.0074	0.3017	0.2752	1	162303907	0.0095	0.4335	140254	61106	outcome	1	162303907	1.62218e-12	0.02747	3620	CD16 on CD14- CD16+ monocyte	prostate cancer	7.0076e-12	0.0159727	58.7274
rs3933769	G	A	G	A	0.2073	0.0046	0.616	0.7568	1	161559327	0.0111	0.6742	140254	61106	outcome	1	161559327	2.13599e-14	0.02701	3620	CD16 on CD14- CD16+ monocyte	prostate cancer	6.85197e-14	0.0203301	75.0809
rs4971121	T	G	T	G	-0.1911	0.0063	0.1628	0.2717	1	157955705	0.0095	0.5048	140254	61106	outcome	1	157955705	1.25901e-08	0.0335	3620	CD16 on CD14- CD16+ monocyte	prostate cancer	3.42925e-08	0.00995486	36.3788
rs71632979	G	A	G	A	-1.196	-0.0188	0.2463	0.1189	1	161526397	0.0135	0.1661	140254	61106	outcome	1	161526397	1e-200	0.02175	3620	CD16 on CD14- CD16+ monocyte	prostate cancer	0	0.531074	4097.51
rs71639910	A	G	A	G	-0.5608	-0.014	0.07	0.0287	1	161937774	0.0254	0.5806	140254	61106	outcome	1	161937774	4.62701e-31	0.04793	3620	CD16 on CD14- CD16+ monocyte	prostate cancer	4.59623e-30	0.0409475	154.473
rs75072970	C	T	C	T	-0.4446	-0.0113	0.0494	0.0425	1	161058351	0.0216	0.6026	140254	61106	outcome	1	161058351	5.47772e-15	0.05665	3620	CD16 on CD14- CD16+ monocyte	prostate cancer	2.12104e-14	0.0185649	68.4385
rs116671810	A	G	A	G	0.3239	0.0374	0.0711	0.0073	6	31450274	0.0468	0.4234	140254	61106	outcome	6	31450274	4.65704e-09	0.05515	3621	HLA DR on CD14- CD16+ monocyte	prostate cancer	1.49571e-08	0.0138577	50.8557
rs61742525	A	G	A	G	0.313	0.0104	0.0888	0.0125	6	33072522	0.0364	0.774499	140254	61106	outcome	6	33072522	9.64273e-11	0.04821	3621	HLA DR on CD14- CD16+ monocyte	prostate cancer	2.12945e-10	0.0158542	58.3008
rs6808893	T	C	T	C	-0.2043	-0.0219	0.5719	0.525	3	188133439	0.0087	0.01214	140254	61106	outcome	3	188133439	3.26964e-16	0.02491	3621	HLA DR on CD14- CD16+ monocyte	prostate cancer	1.68586e-14	0.0204377	75.5072
rs6917212	G	C	G	C	-0.476	0.0222	0.777	0.5817	6	32583005	0.0081	0.00623405	140254	61106	outcome	6	32583005	1.32495e-48	0.03201	3621	HLA DR on CD14- CD16+ monocyte	prostate cancer	3.79764e-45	0.0785181	308.37
rs73499473	T	C	T	C	0.3801	0.0035	0.776	0.7198	16	10978885	0.0096	0.717399	140254	61106	outcome	16	10978885	1.90897e-38	0.02898	3621	HLA DR on CD14- CD16+ monocyte	prostate cancer	1.86664e-37	0.0502268	191.383
rs8057874	C	G	C	G	0.1477	-0.0119	0.3318	0.3518	16	10706593	0.0086	0.1665	140254	61106	outcome	16	10706593	2.10698e-08	0.02631	3621	HLA DR on CD14- CD16+ monocyte	prostate cancer	1.06898e-07	0.00967328	35.3496
rs9269109	C	T	C	T	0.3511	-0.0305	0.3592	0.6613	6	32443266	0.0084	0.000270097	140254	61106	outcome	6	32443266	1.18604e-32	0.02921	3621	HLA DR on CD14- CD16+ monocyte	prostate cancer	3.53004e-29	0.056748	217.727
rs11136335	A	G	A	G	-0.1653	0.0029	0.4853	0.4026	8	145003777	0.0085	0.7356	140254	61106	outcome	8	145003777	2.201e-09	0.02755	2850	SSC-A on monocyte	prostate cancer	4.14235e-09	0.0136502	39.4139
rs1152928	G	A	G	A	-0.8234	0.0071	0.0172	0.0195	12	69247557	0.0302	0.8143	140254	61106	outcome	12	69247557	7.26942e-15	0.1053	2850	SSC-A on monocyte	prostate cancer	1.59794e-14	0.0229216	66.8122
rs11554159	A	G	A	G	-0.3745	0.0179	0.2982	0.2616	19	18285944	0.0091	0.0484898	140254	61106	outcome	19	18285944	3.1369e-36	0.02938	2850	SSC-A on monocyte	prostate cancer	2.35223e-34	0.0587022	177.61
rs148146302	C	G	C	G	-0.8766	-0.0131	0.0239	0.0116	12	70360198	0.0398	0.7417	140254	61106	outcome	12	70360198	3.80014e-23	0.08769	2850	SSC-A on monocyte	prostate cancer	1.22464e-22	0.035853	105.906
rs1800973	A	C	A	C	-1.218	-0.0181	0.0844	0.0717	12	69744014	0.0175	0.2999	140254	61106	outcome	12	69744014	1.71396e-145	0.04471	2850	SSC-A on monocyte	prostate cancer	2.06091e-146	0.229284	847.263
rs75994780	A	G	A	G	-0.4161	0.0109	0.0637	0.0281	12	70949085	0.029	0.706999	140254	61106	outcome	12	70949085	1.63493e-13	0.05614	2850	SSC-A on monocyte	prostate cancer	3.86978e-13	0.0206528	60.0597
rs80216229	C	T	C	T	-0.5777	0.0496	0.0212	0.0174	12	67839087	0.0382	0.1936	140254	61106	outcome	12	67839087	4.348e-09	0.0981	2850	SSC-A on monocyte	prostate cancer	1.75995e-08	0.0138505	40.0002
rs10422871	T	C	T	C	-0.2765	-0.011	0.0888	0.0818	19	8789227	0.0156	0.4778	140254	61106	outcome	19	8789227	3.60296e-09	0.04672	3113	SSC-A on Natural Killer T	prostate cancer	9.58198e-09	0.0123722	38.9721
rs10765790	C	T	C	T	0.1554	-0.0037	0.5524	0.5365	11	95852734	0.0082	0.6462	140254	61106	outcome	11	95852734	1.54999e-08	0.02741	3113	SSC-A on Natural Killer T	prostate cancer	3.19026e-08	0.011942	37.6005
rs1801274	G	A	G	A	0.624	-0.0078	0.3303	0.5082	1	161479745	0.0082	0.3417	140254	61106	outcome	1	161479745	6.27047e-61	0.03633	1635	CD11b on CD14+ monocyte	prostate cancer	4.09662e-61	0.172261	339.845
rs138915779	A	C	A	C	1.33	0.0528	0.0036	0.0162	1	190079170	0.035	0.1315	140254	61106	outcome	1	190079170	6.18899e-09	0.2281	2910	CD45RA on naive CD4+ T cell	prostate cancer	2.95428e-08	0.0126902	37.3775
rs145947216	T	C	T	C	0.7147	-0.0144	0.0375	0.0157	2	38596674	0.0423	0.7335	140254	61106	outcome	2	38596674	9.977e-24	0.07055	2910	CD45RA on naive CD4+ T cell	prostate cancer	3.45094e-23	0.0368731	111.332
rs147071297	A	G	A	G	1.525	-0.0531	0.0036	0.017	1	191648600	0.0342	0.1205	140254	61106	outcome	1	191648600	9.25124e-13	0.2126	2910	CD45RA on naive CD4+ T cell	prostate cancer	7.0492e-12	0.0166842	49.3409
rs147692482	T	C	T	C	0.6089	-0.0166	0.0246	0.0117	2	39864242	0.0426	0.697301	140254	61106	outcome	2	39864242	6.3183e-13	0.08426	2910	CD45RA on naive CD4+ T cell	prostate cancer	1.49768e-12	0.0177926	52.6782
rs17583875	A	G	A	G	2.212	-0.0122	0.0029	0.0252	1	197924770	0.0286	0.6697	140254	61106	outcome	1	197924770	2.83074e-21	0.2318	2910	CD45RA on naive CD4+ T cell	prostate cancer	1.01654e-20	0.0282968	84.6833
rs182240059	G	C	G	C	0.6602	0.0343	0.0351	0.0122	2	38955419	0.042	0.4139	140254	61106	outcome	2	38955419	2.53105e-20	0.07094	2910	CD45RA on naive CD4+ T cell	prostate cancer	1.45067e-19	0.0295237	88.4667
rs34558770	T	C	T	C	0.4963	-0.0193	0.1871	0.0841	2	38933040	0.0157	0.2187	140254	61106	outcome	2	38933040	5.75043e-51	0.03241	2910	CD45RA on naive CD4+ T cell	prostate cancer	1.8996e-49	0.0749255	235.53
rs7605193	G	T	G	T	-0.3245	0.0023	0.0643	0.0531	2	38698112	0.019	0.9023	140254	61106	outcome	2	38698112	1.19001e-09	0.05318	2910	CD45RA on naive CD4+ T cell	prostate cancer	1.87195e-09	0.0126709	37.3198
rs79747818	T	C	T	C	0.3184	-0.0357	0.0689	0.0143	2	41757305	0.0394	0.3651	140254	61106	outcome	2	41757305	1.59302e-09	0.0526	2910	CD45RA on naive CD4+ T cell	prostate cancer	4.9513e-09	0.0130074	38.3241
rs917116	G	T	G	T	0.1762	-0.0214	0.2548	0.2194	7	28172739	0.0096	0.0253099	140254	61106	outcome	7	28172739	4.25598e-09	0.0299	2910	CD45RA on naive CD4+ T cell	prostate cancer	3.74154e-08	0.01179	34.6944
rs116007826	G	A	G	A	0.6643	0.0366	0.0681	0.0061	6	31569745	0.0563	0.5162	140254	61106	outcome	6	31569745	1.74783e-17	0.07716	1579	HLA DR on CD33+ HLA DR+ CD14-	prostate cancer	3.62275e-17	0.0560112	93.5707
rs523727	G	A	G	A	-0.3524	-0.0187	0.3157	0.185	6	31768800	0.0103	0.0706806	140254	61106	outcome	6	31768800	1.89017e-15	0.04389	1579	HLA DR on CD33+ HLA DR+ CD14-	prostate cancer	1.01703e-14	0.0536566	89.4141
rs9270588	T	C	T	C	-0.5992	-0.0287	0.5722	0.5546	6	32561327	0.008	0.000343099	140254	61106	outcome	6	32561327	2.1419e-49	0.03915	1579	HLA DR on CD33+ HLA DR+ CD14-	prostate cancer	1.54173e-47	0.175777	336.317
rs10205992	T	C	T	C	-0.2955	-0.0017	0.4729	0.5302	2	87279109	0.0092	0.8547	140254	61106	outcome	2	87279109	2.99778e-28	0.02653	2920	CD8 on CD28+ CD45RA+ CD8+ T cell	prostate cancer	9.31421e-28	0.0435319	132.807
rs1264570	T	C	T	C	0.1984	-0.0292	0.7204	0.5951	6	30365210	0.0082	0.000351998	140254	61106	outcome	6	30365210	1.417e-09	0.03266	2920	CD8 on CD28+ CD45RA+ CD8+ T cell	prostate cancer	4.00587e-08	0.0158571	47.0166
rs12660712	A	C	A	C	-0.2799	0.0825	0.1152	0.0265	6	29734634	0.0241	0.000626801	140254	61106	outcome	6	29734634	1.15401e-08	0.04891	2920	CD8 on CD28+ CD45RA+ CD8+ T cell	prostate cancer	2.41699e-07	0.015971	47.3599
rs1356625	C	T	C	T	0.192	0.0149	0.463	0.483	2	86022747	0.0081	0.0678094	140254	61106	outcome	2	86022747	1.36616e-12	0.02696	2920	CD8 on CD28+ CD45RA+ CD8+ T cell	prostate cancer	1.33583e-11	0.0183311	54.4889
rs6903896	A	G	A	G	-0.3411	-0.0341	0.1269	0.0254	6	31168029	0.0253	0.1783	140254	61106	outcome	6	31168029	1.49314e-13	0.04595	2920	CD8 on CD28+ CD45RA+ CD8+ T cell	prostate cancer	9.98595e-13	0.0257821	77.2233
rs938487	G	A	G	A	-0.5168	-0.0052	0.2476	0.4327	2	87009488	0.0092	0.570401	140254	61106	outcome	2	87009488	2.91072e-65	0.02954	2920	CD8 on CD28+ CD45RA+ CD8+ T cell	prostate cancer	2.17057e-64	0.0995118	322.464
rs17405603	T	A	T	A	0.1542	-0.0021	0.284	0.29	5	144608340	0.0091	0.8185	140254	61106	outcome	144608340	2.38298e-08	0.02757	3658	5	IgD+ B cell %B cell	prostate cancer
rs113398446	C	A	C	A	0.1793	-0.0182	0.1687	0.2006	6	161871755	0.0124	0.1417	140254	61106	outcome	161871755	3.91201e-08	0.03256	3657	6	IgD+ CD38- B cell %B cell	prostate cancer
rs77762131	C	G	C	G	0.3388	-0.0699	0.045	0.02	14	96205838	0.0334	0.0364099	140254	61106	outcome	96205838	4.101e-09	0.05748	3657	14	IgD+ CD38- B cell %B cell	prostate cancer
rs73192651	T	C	T	C	0.5551	-0.0061	0.02	0.0087	13	50212885	0.0514	0.9056	140254	61106	outcome	50212885	7.31493e-10	0.08989	3657	13	Unswitched memory B cell %B cell	prostate cancer
rs45608038	G	A	G	A	0.3527	0.0072	0.0421	0.0158	2	73679013	0.0412	0.8618	140254	61106	outcome	73679013	1.71002e-08	0.0624	3657	2	CD24+ CD27+ B cell %B cell	prostate cancer
rs75766272	T	C	T	C	-0.4865	-0.0145	0.0201	0.0302	1	8009985	0.0273	0.596	140254	61106	outcome	8009985	2.04899e-08	0.08656	3657	1	CD24+ CD27+ B cell %B cell	prostate cancer
rs76477280	G	A	G	A	0.4892	0.0179	0.0206	0.0092	13	50147180	0.0491	0.7151	140254	61106	outcome	50147180	3.02803e-08	0.08811	3657	13	CD24+ CD27+ B cell %B cell	prostate cancer
rs11657759	C	A	C	A	-0.1352	0.007	0.4903	0.4814	17	2715961	0.0082	0.3932	140254	61106	outcome	2715961	1.80701e-08	0.02397	3656	17	CD24+ CD27+ B cell %lymphocyte	prostate cancer
rs12874404	G	A	G	A	0.2114	-0.0188	0.3256	0.0595	13	108993494	0.0193	0.3308	140254	61106	outcome	108993494	8.08537e-16	0.02614	3656	13	CD24+ CD27+ B cell %lymphocyte	prostate cancer
rs73192651	T	C	T	C	0.5056	-0.0061	0.02	0.0087	13	50212885	0.0514	0.9056	140254	61106	outcome	50212885	8.74601e-09	0.08768	3656	13	CD24+ CD27+ B cell %lymphocyte	prostate cancer
rs115805162	T	C	T	C	-0.2598	-0.0042	0.2084	0.0657	1	161410253	0.0172	0.8093	140254	61106	outcome	161410253	8.20163e-15	0.03331	3410	1	CD86+ myeloid Dendritic Cell %Dendritic Cell	prostate cancer
rs71632979	G	A	G	A	0.8089	-0.0188	0.2447	0.1189	1	161526397	0.0135	0.1661	140254	61106	outcome	161526397	4.21697e-165	0.02792	3410	1	CD86+ myeloid Dendritic Cell %Dendritic Cell	prostate cancer
rs71639910	A	G	A	G	0.3612	-0.014	0.0688	0.0287	1	161937774	0.0254	0.5806	140254	61106	outcome	161937774	4.9023e-12	0.0521	3410	1	CD86+ myeloid Dendritic Cell %Dendritic Cell	prostate cancer
rs75072970	C	T	C	T	0.3513	-0.0113	0.0531	0.0425	1	161058351	0.0216	0.6026	140254	61106	outcome	161058351	2.73099e-09	0.05892	3410	1	CD86+ myeloid Dendritic Cell %Dendritic Cell	prostate cancer
rs115805162	T	C	T	C	-0.2838	-0.0042	0.2084	0.0657	1	161410253	0.0172	0.8093	140254	61106	outcome	161410253	6.29796e-18	0.03272	3410	1	CD62L- myeloid Dendritic Cell %Dendritic Cell	prostate cancer
rs148765873	C	T	C	T	-0.3975	0.0228	0.0437	0.0111	1	161221713	0.0409	0.5765	140254	61106	outcome	161221713	1.42801e-09	0.06549	3410	1	CD62L- myeloid Dendritic Cell %Dendritic Cell	prostate cancer
rs191217950	A	G	A	G	0.8012	0.0406	0.0095	0.0139	1	160940671	0.0374	0.277	140254	61106	outcome	160940671	8.70903e-10	0.1303	3410	1	CD62L- myeloid Dendritic Cell %Dendritic Cell	prostate cancer
rs3933769	G	A	G	A	-0.1594	0.0046	0.6129	0.7568	1	161559327	0.0111	0.6742	140254	61106	outcome	161559327	1.20301e-08	0.0279	3410	1	CD62L- myeloid Dendritic Cell %Dendritic Cell	prostate cancer
rs71632979	G	A	G	A	0.8232	-0.0188	0.2447	0.1189	1	161526397	0.0135	0.1661	140254	61106	outcome	161526397	8.531e-178	0.02725	3410	1	CD62L- myeloid Dendritic Cell %Dendritic Cell	prostate cancer
rs71639910	A	G	A	G	0.4169	-0.014	0.0688	0.0287	1	161937774	0.0254	0.5806	140254	61106	outcome	161937774	5.85868e-16	0.05126	3410	1	CD62L- myeloid Dendritic Cell %Dendritic Cell	prostate cancer
rs75072970	C	T	C	T	0.388	-0.0113	0.0531	0.0425	1	161058351	0.0216	0.6026	140254	61106	outcome	161058351	2.82683e-11	0.0581	3410	1	CD62L- myeloid Dendritic Cell %Dendritic Cell	prostate cancer
rs6535445	C	T	C	T	-0.2794	-0.0066	0.3435	0.3382	4	84151427	0.0087	0.4494	140254	61106	outcome	84151427	5.62471e-28	0.02525	3374	4	CD62L- plasmacytoid Dendritic Cell Absolute Count	prostate cancer
rs1571025	G	A	G	A	0.2422	-0.0199	0.1766	0.1253	10	6134869	0.0122	0.1018	140254	61106	outcome	6134869	1.10892e-12	0.0339	3437	10	CD4 regulatory T cell %CD4+ T cell	prostate cancer
rs6602392	A	C	A	C	0.2173	0.0274	0.1155	0.1032	10	6078079	0.0131	0.0357899	140254	61106	outcome	6078079	3.33703e-08	0.03926	3437	10	CD4 regulatory T cell %CD4+ T cell	prostate cancer
rs17583875	A	G	A	G	1.827	-0.0122	0.0029	0.0252	1	197924770	0.0286	0.6697	140254	61106	outcome	197924770	4.63981e-16	0.2239	3437	1	Activated & resting CD4 regulatory T cell %CD4+ T cell	prostate cancer
rs408686	A	C	A	C	-0.2228	0.0057	0.8142	0.9181	2	39177320	0.0157	0.716401	140254	61106	outcome	39177320	5.06058e-12	0.03216	3437	2	Activated & resting CD4 regulatory T cell %CD4+ T cell	prostate cancer
rs6751481	C	T	C	T	0.2086	-0.0051	0.4709	0.5181	2	38897810	0.0083	0.5413	140254	61106	outcome	38897810	5.19278e-17	0.02476	3437	2	Activated & resting CD4 regulatory T cell %CD4+ T cell	prostate cancer
rs61839660	T	C	T	C	0.4625	-0.0205	0.0542	0.0865	10	6094697	0.0143	0.1509	140254	61106	outcome	6094697	4.05415e-16	0.05656	3405	10	CD25++ CD4+ T cell Absolute Count	prostate cancer
rs10905892	T	C	T	C	0.2715	-0.0332	0.0752	0.0364	10	6183022	0.0219	0.1293	140254	61106	outcome	6183022	2.04202e-08	0.04829	3437	10	CD25++ CD4+ T cell %CD4+ T cell	prostate cancer
rs61839660	T	C	T	C	0.592	-0.0205	0.0543	0.0865	10	6094697	0.0143	0.1509	140254	61106	outcome	6094697	1.63682e-26	0.05509	3437	10	CD25++ CD4+ T cell %CD4+ T cell	prostate cancer
rs61839660	T	C	T	C	0.5156	-0.0205	0.0543	0.0865	10	6094697	0.0143	0.1509	140254	61106	outcome	6094697	3.2107e-20	0.05562	3437	10	CD25++ CD4+ T cell %T cell	prostate cancer
rs2455069	G	A	G	A	0.3938	-0.0138	0.5197	0.416	19	51728641	0.0082	0.0912704	140254	61106	outcome	51728641	1.24911e-32	0.03247	1857	19	Immature Myeloid-Derived Suppressor Cells Absolute Count	prostate cancer
rs4499342	T	C	T	C	-0.2816	-0.0043	0.1527	0.1586	19	8786913	0.011	0.6962	140254	61106	outcome	8786913	2.20298e-09	0.04685	1857	19	Immature Myeloid-Derived Suppressor Cells Absolute Count	prostate cancer
rs113243185	C	G	C	G	0.2134	-0.0176	0.1996	0.1294	6	32585071	0.012	0.1439	140254	61106	outcome	32585071	8.18898e-09	0.03693	3427	6	Effector Memory CD4+ T cell %T cell	prostate cancer
rs146620586	T	G	T	G	-1.711	-0.0372	0.0032	0.0173	1	198524264	0.0373	0.3183	140254	61106	outcome	198524264	1.02301e-10	0.2639	3427	1	Effector Memory CD4+ T cell %T cell	prostate cancer
rs9267484	T	A	T	A	0.2376	-0.0242	0.1729	0.019	6	31505724	0.0294	0.4091	140254	61106	outcome	31505724	1.547e-08	0.0419	3427	6	Effector Memory CD4+ T cell %T cell	prostate cancer
rs9271536	T	A	T	A	-0.2368	-0.0183	0.7798	0.8057	6	32589978	0.01	0.0688002	140254	61106	outcome	32589978	2.95393e-12	0.0338	3427	6	Effector Memory CD4+ T cell %T cell	prostate cancer
rs111902980	A	G	A	G	0.5134	0.0048	0.0193	0.0332	1	157954450	0.0237	0.8386	140254	61106	outcome	157954450	2.64899e-08	0.09207	3427	1	Effector Memory CD4-CD8- T cell %CD4-CD8- T cell	prostate cancer
rs113435341	G	A	G	A	-1.798	-0.0424	0.0032	0.0194	1	198151688	0.0318	0.1815	140254	61106	outcome	198151688	3.81505e-15	0.2277	3427	1	Effector Memory CD4-CD8- T cell %CD4-CD8- T cell	prostate cancer
rs116877116	A	G	A	G	0.2343	0.0546	0.1008	0.0191	8	135490341	0.0298	0.0670301	140254	61106	outcome	135490341	3.31597e-08	0.04232	3427	8	Effector Memory CD4-CD8- T cell %CD4-CD8- T cell	prostate cancer
rs150992058	C	G	C	G	-1.066	0.0081	0.0058	0.0129	1	195919147	0.0432	0.8506	140254	61106	outcome	195919147	3.58303e-08	0.193	3427	1	Effector Memory CD4-CD8- T cell %CD4-CD8- T cell	prostate cancer
rs3829793	G	C	G	C	0.1649	-0.0084	0.3147	0.3465	1	161194400	0.0084	0.3199	140254	61106	outcome	161194400	7.587e-10	0.02672	3629	1	CD14+ CD16+ monocyte Absolute Count	prostate cancer
rs71632979	G	A	G	A	-0.6399	-0.0188	0.2479	0.1189	1	161526397	0.0135	0.1661	140254	61106	outcome	161526397	1.55597e-113	0.02726	3629	1	CD14+ CD16+ monocyte Absolute Count	prostate cancer
rs71639910	A	G	A	G	-0.3061	-0.014	0.0704	0.0287	1	161937774	0.0254	0.5806	140254	61106	outcome	161937774	2.24698e-10	0.04812	3629	1	CD14+ CD16+ monocyte Absolute Count	prostate cancer
rs11025036	A	G	A	G	-0.4567	-0.0249	0.022	0.0317	11	19175633	0.024	0.2995	140254	61106	outcome	19175633	3.35097e-08	0.08253	3652	11	CD4+CD8+ T cell Absolute Count	prostate cancer
rs2857229	G	A	G	A	0.273	-0.0021	0.2581	0.3304	12	6900616	0.0092	0.818	140254	61106	outcome	6900616	1.033e-22	0.02764	3652	12	CD4+CD8+ T cell Absolute Count	prostate cancer
rs597808	G	A	G	A	-0.1543	0.0202	0.5363	0.5166	12	111973358	0.0082	0.0139399	140254	61106	outcome	111973358	9.39399e-09	0.02682	3653	12	Lymphocyte Absolute Count	prostate cancer
rs9271629	A	C	A	C	0.1945	-0.018	0.7416	0.8061	6	32591976	0.01	0.0728702	140254	61106	outcome	32591976	1.646e-08	0.03437	3653	6	Lymphocyte Absolute Count	prostate cancer
rs11080350	T	C	T	C	-0.1548	-0.0219	0.4017	0.2875	17	33774635	0.0095	0.0212501	140254	61106	outcome	33774635	9.08092e-10	0.0252	3668	17	CD8+ and CD8dim T cell %leukocyte	prostate cancer
rs73402222	C	T	C	T	-0.1904	0.0036	0.3458	0.0634	6	31388449	0.0162	0.8231	140254	61106	outcome	31388449	4.58501e-09	0.03241	3668	6	CD8+ and CD8dim T cell %leukocyte	prostate cancer
rs3087456	A	G	A	G	-0.3114	0.0012	0.7662	0.7348	16	10970902	0.0096	0.897	140254	61106	outcome	10970902	1.34307e-33	0.02551	3595	16	HLA DR+ CD4+ T cell %lymphocyte	prostate cancer
rs7032773	T	C	T	C	-0.1334	-0.0055	0.4182	0.4486	9	117645562	0.0082	0.5029	140254	61106	outcome	117645562	1.392e-08	0.02345	3595	9	HLA DR+ CD4+ T cell %lymphocyte	prostate cancer
rs17824379	G	A	G	A	-1.353	-0.022	0.0027	0.0183	3	5810961	0.0357	0.5381	140254	61106	outcome	5810961	2.63403e-09	0.2268	3653	3	CD3- lymphocyte Absolute Count	prostate cancer
rs4796089	C	T	C	T	0.2435	-0.0038	0.1343	0.089	17	33814758	0.0148	0.7971	140254	61106	outcome	33814758	6.12915e-11	0.0371	3440	17	CD28+ CD4-CD8- T cell %CD4-CD8- T cell	prostate cancer
rs9269109	C	T	C	T	0.1597	-0.0305	0.3593	0.6613	6	32443266	0.0084	0.000270097	140254	61106	outcome	32443266	1.035e-08	0.02782	3130	6	CD28- CD25++ CD8+ T cell Absolute Count	prostate cancer
rs61839660	T	C	T	C	0.3212	-0.0205	0.0541	0.0865	10	6094697	0.0143	0.1509	140254	61106	outcome	6094697	3.41099e-08	0.05805	3162	10	CD25++ CD8+ T cell %T cell	prostate cancer
rs78667279	A	G	A	G	-0.7401	0.0234	0.0096	0.0472	2	54957709	0.0195	0.2293	140254	61106	outcome	54957709	1.367e-08	0.13	3162	2	CD25++ CD8+ T cell %T cell	prostate cancer
rs6755452	G	T	G	T	0.2159	-0.0043	0.189	0.2475	2	87035076	0.0103	0.6736	140254	61106	outcome	87035076	5.00495e-11	0.03275	3440	2	CD28- CD4-CD8- T cell %T cell	prostate cancer
rs9896155	G	A	G	A	0.1701	-0.0193	0.6741	0.4597	17	33794697	0.0085	0.02243	140254	61106	outcome	33794697	5.51303e-10	0.02733	3440	17	CD28- CD4-CD8- T cell %T cell	prostate cancer
rs117430146	C	G	C	G	0.3164	0.0714	0.0561	0.0133	22	41998660	0.0367	0.0515395	140254	61106	outcome	41998660	1.45101e-08	0.0557	3657	22	BAFF-R on IgD+ CD24- B cell	prostate cancer
rs117705111	A	G	A	G	-0.763	0.0291	0.0365	0.0315	22	41957510	0.0236	0.2178	140254	61106	outcome	41957510	2.9662e-31	0.065	3657	22	BAFF-R on IgD+ CD24- B cell	prostate cancer
rs149806587	G	A	G	A	-0.5384	-0.0553	0.0526	0.0118	22	40774205	0.0419	0.1866	140254	61106	outcome	40774205	9.76562e-21	0.05731	3657	22	BAFF-R on IgD+ CD24- B cell	prostate cancer
rs1801274	G	A	G	A	-0.1805	-0.0078	0.325	0.5082	1	161479745	0.0082	0.3417	140254	61106	outcome	161479745	2.28876e-11	0.02691	3657	1	BAFF-R on IgD+ CD24- B cell	prostate cancer
rs182240980	T	A	T	A	-1.51	0.0018	0.099	0.0803	22	42317478	0.0148	0.903	140254	61106	outcome	42317478	1e-200	0.03362	3657	22	BAFF-R on IgD+ CD24- B cell	prostate cancer
rs1894588	T	C	T	C	-0.532	-0.0178	0.0622	0.0361	22	40629980	0.0225	0.4298	140254	61106	outcome	40629980	3.96917e-25	0.051	3657	22	BAFF-R on IgD+ CD24- B cell	prostate cancer
rs5757678	T	C	T	C	0.2191	0.0007	0.6418	0.7323	22	39843409	0.0091	0.9399	140254	61106	outcome	39843409	3.82384e-17	0.0259	3657	22	BAFF-R on IgD+ CD24- B cell	prostate cancer
rs5759079	A	G	A	G	-0.4296	0.0295	0.1406	0.0795	22	43393437	0.0148	0.0464505	140254	61106	outcome	43393437	3.27265e-32	0.03601	3657	22	BAFF-R on IgD+ CD24- B cell	prostate cancer
rs76146864	T	C	T	C	-0.7283	-0.0253	0.0264	0.022	22	40246055	0.0294	0.3887	140254	61106	outcome	40246055	1.10002e-20	0.07763	3657	22	BAFF-R on IgD+ CD24- B cell	prostate cancer
rs112417310	A	G	A	G	0.5195	-0.0128	0.0201	0.0109	1	206855483	0.0423	0.7623	140254	61106	outcome	206855483	5.79095e-09	0.08901	3658	1	CD19 on IgD+ B cell	prostate cancer
rs113812519	G	A	G	A	0.5095	-0.0433	0.0185	0.0133	1	207276336	0.0425	0.3079	140254	61106	outcome	207276336	2.90998e-08	0.09165	3658	1	CD19 on IgD+ B cell	prostate cancer
rs147487472	A	C	A	C	0.4465	0.0233	0.0414	0.0595	10	6191376	0.0179	0.1922	140254	61106	outcome	6191376	5.59887e-13	0.0617	3657	10	CD25 on naive-mature B cell	prostate cancer
rs17403348	C	T	C	T	0.2314	0.0087	0.0997	0.0333	10	5827901	0.0233	0.7104	140254	61106	outcome	5827901	3.85798e-08	0.04201	3657	10	CD25 on naive-mature B cell	prostate cancer
rs3793662	T	C	T	C	-0.1953	0.0016	0.7759	0.8052	9	95886051	0.0102	0.8731	140254	61106	outcome	95886051	4.56352e-11	0.02956	3657	9	CD25 on naive-mature B cell	prostate cancer
rs41294937	C	T	C	T	0.5626	-0.0055	0.1075	0.0487	10	6106621	0.0185	0.767201	140254	61106	outcome	6106621	2.21411e-43	0.04021	3657	10	CD25 on naive-mature B cell	prostate cancer
rs115062208	G	A	G	A	-0.8972	0.0139	0.0115	0.0202	4	15956227	0.0312	0.6557	140254	61106	outcome	15956227	1.7108e-13	0.1213	3654	4	CD38 on IgD+ CD38dim B cell	prostate cancer
rs572542	T	C	T	C	-0.4696	-0.0008	0.0289	0.0229	4	14029370	0.0274	0.9767	140254	61106	outcome	14029370	1.54099e-10	0.07316	3654	4	CD38 on IgD+ CD38dim B cell	prostate cancer
rs76112278	A	G	A	G	-1.065	0.0179	0.0194	0.0119	4	15915069	0.0432	0.6784	140254	61106	outcome	15915069	3.62994e-32	0.08937	3654	4	CD38 on IgD+ CD38dim B cell	prostate cancer
rs76354299	A	G	A	G	-0.502	0.0242	0.0322	0.0353	4	15037408	0.0234	0.301	140254	61106	outcome	15037408	7.84332e-13	0.06983	3654	4	CD38 on IgD+ CD38dim B cell	prostate cancer
rs2949661	T	C	T	C	0.567	0.0114	0.4463	0.3684	1	167424924	0.0085	0.1775	140254	61106	outcome	167424924	3.45064e-99	0.0258	2912	1	CD3 on Central Memory CD4+ T cell	prostate cancer
rs4657649	C	T	C	T	0.4895	-0.0198	0.0512	0.0937	1	167173140	0.0156	0.2049	140254	61106	outcome	167173140	3.55713e-15	0.06186	2912	1	CD3 on Central Memory CD4+ T cell	prostate cancer
rs61814886	A	G	A	G	0.2973	-0.0067	0.1063	0.1187	1	167136405	0.0126	0.5961	140254	61106	outcome	167136405	2.51015e-11	0.04438	2912	1	CD3 on Central Memory CD4+ T cell	prostate cancer
rs9842595	T	G	T	G	0.2031	-0.0123	0.1708	0.0874	3	45922691	0.0145	0.3965	140254	61106	outcome	45922691	3.19198e-08	0.03663	2912	3	CD3 on Central Memory CD4+ T cell	prostate cancer
rs10918641	A	T	A	T	0.2629	-0.0235	0.243	0.2161	1	167113992	0.0099	0.0171199	140254	61106	outcome	167113992	1.2659e-16	0.03157	2918	1	CD3 on resting CD4 regulatory T cell	prostate cancer
rs12752576	G	A	G	A	-0.7279	0.029	0.0154	0.0403	1	168605042	0.0217	0.1809	140254	61106	outcome	168605042	4.56667e-11	0.1101	2918	1	CD3 on resting CD4 regulatory T cell	prostate cancer
rs6668517	C	A	C	A	-0.2306	0.0181	0.1227	0.11	1	26556870	0.0131	0.1664	140254	61106	outcome	26556870	2.65901e-08	0.04135	2918	1	CD3 on resting CD4 regulatory T cell	prostate cancer
rs74620952	C	T	C	T	-1.355	0.0178	0.0031	0.03	11	117753136	0.0274	0.5152	140254	61106	outcome	117753136	4.462e-08	0.247	2918	11	CD3 on resting CD4 regulatory T cell	prostate cancer
rs75169391	T	C	T	C	-0.3981	-0.0011	0.0389	0.0584	1	165284481	0.0198	0.956	140254	61106	outcome	165284481	1.907e-08	0.07064	2918	1	CD3 on resting CD4 regulatory T cell	prostate cancer
rs2182176	A	G	A	G	0.2882	0.0166	0.5882	0.4691	1	2499254	0.0084	0.0480795	140254	61106	outcome	2499254	3.85567e-13	0.03927	1247	1	HVEM on Effector Memory CD4+ T cell	prostate cancer
rs113116201	C	T	C	T	1.068	-0.0285	0.0044	0.0169	1	198830942	0.0323	0.3784	140254	61106	outcome	198830942	8.02398e-09	0.1846	3435	1	CD25 on activated & secreting CD4 regulatory T cell	prostate cancer
rs62447171	A	G	A	G	-0.2192	0.0056	0.2429	0.2609	7	50309890	0.01	0.578699	140254	61106	outcome	50309890	4.67951e-11	0.03318	2872	7	CD123 on plasmacytoid Dendritic Cell	prostate cancer
rs7658518	A	G	A	G	-0.3048	-0.0121	0.294	0.2831	4	84160279	0.0092	0.1919	140254	61106	outcome	84160279	4.47713e-23	0.03055	2872	4	CD123 on plasmacytoid Dendritic Cell	prostate cancer
rs12207025	C	G	C	G	0.2769	-0.0889	0.1118	0.0297	6	31010555	0.0239	0.000198802	140254	61106	outcome	31010555	1.73301e-09	0.04585	3113	6	FSC-A on CD4+ T cell	prostate cancer
rs9271673	G	C	G	C	-0.2096	-0.0171	0.7652	0.804	6	32592833	0.01	0.0879893	140254	61106	outcome	32592833	1.92801e-10	0.03281	3113	6	FSC-A on CD4+ T cell	prostate cancer
rs147174426	T	A	T	A	0.2753	-0.0105	0.17	0.0635	1	161528012	0.0183	0.5646	140254	61106	outcome	161528012	6.43428e-17	0.03278	3621	1	CCR2 on CD14- CD16+ monocyte	prostate cancer
rs2169052	C	T	C	T	0.2363	0.0093	0.1476	0.2674	1	161557154	0.0105	0.3758	140254	61106	outcome	161557154	2.75398e-09	0.03961	2870	1	CCR2 on myeloid Dendritic Cell	prostate cancer
rs35587265	G	A	G	A	-0.4223	0.0065	0.0624	0.0877	3	46259296	0.0145	0.6546	140254	61106	outcome	46259296	7.75354e-13	0.05867	2870	3	CCR2 on myeloid Dendritic Cell	prostate cancer
rs55971447	T	C	T	C	-0.4101	-0.0202	0.2369	0.1176	1	161515326	0.0134	0.1325	140254	61106	outcome	161515326	2.58583e-37	0.03167	2870	1	CCR2 on myeloid Dendritic Cell	prostate cancer
rs10882701	C	A	C	A	-0.4542	-0.0017	0.5156	0.5719	10	97741071	0.009	0.8465	140254	61106	outcome	97741071	4.04762e-64	0.02621	2920	10	CD39 on CD39+ activated CD4 regulatory T cell	prostate cancer
rs11188757	C	A	C	A	-0.2585	0.0069	0.2195	0.2947	10	98205222	0.009	0.443	140254	61106	outcome	98205222	1.18604e-14	0.03332	2920	10	CD39 on CD39+ activated CD4 regulatory T cell	prostate cancer
rs12778797	C	T	C	T	0.3052	-0.0119	0.3854	0.3926	10	96998688	0.0083	0.1507	140254	61106	outcome	96998688	1.54312e-27	0.02778	2920	10	CD39 on CD39+ activated CD4 regulatory T cell	prostate cancer
rs1410600	T	C	T	C	-0.2642	-0.0074	0.4053	0.4997	10	97070694	0.0081	0.361	140254	61106	outcome	97070694	1.8151e-21	0.02755	2920	10	CD39 on CD39+ activated CD4 regulatory T cell	prostate cancer
rs1923692	G	T	G	T	-0.4413	0.0217	0.9466	0.9767	10	98173715	0.0325	0.5047	140254	61106	outcome	98173715	1.05512e-13	0.05908	2920	10	CD39 on CD39+ activated CD4 regulatory T cell	prostate cancer
rs7094484	G	A	G	A	1.179	0.0048	0.4729	0.5422	10	97490998	0.0081	0.5524	140254	61106	outcome	97490998	1e-200	0.01657	2920	10	CD39 on CD39+ activated CD4 regulatory T cell	prostate cancer
rs760462	C	T	C	T	0.4516	-0.011	0.8258	0.8363	21	46328099	0.0121	0.3647	140254	61106	outcome	46328099	1.85097e-21	0.04677	1556	21	CD11b on basophil	prostate cancer
rs11074934	T	C	T	C	-0.3589	-0.0005	0.2194	0.2682	16	10979440	0.0098	0.9571	140254	61106	outcome	10979440	1.3649e-17	0.04157	1634	16	HLA DR on CD33dim HLA DR+ CD11b+	prostate cancer
rs61742525	A	G	A	G	0.4117	0.0104	0.0918	0.0125	6	33072522	0.0364	0.774499	140254	61106	outcome	33072522	1.53699e-09	0.06776	1634	6	HLA DR on CD33dim HLA DR+ CD11b+	prostate cancer
rs6917212	G	C	G	C	-0.4813	0.0222	0.7641	0.5817	6	32583005	0.0081	0.00623405	140254	61106	outcome	32583005	2.30781e-26	0.04452	1634	6	HLA DR on CD33dim HLA DR+ CD11b+	prostate cancer
rs9269109	C	T	C	T	0.3633	-0.0305	0.3574	0.6613	6	32443266	0.0084	0.000270097	140254	61106	outcome	32443266	1.28499e-18	0.04076	1634	6	HLA DR on CD33dim HLA DR+ CD11b+	prostate cancer
rs12874404	G	A	G	A	0.1714	-0.0188	0.3256	0.0595	13	108993494	0.0193	0.3308	140254	61106	outcome	0.02663	3656	108993494	1.385e-10	13	IgD+ CD38- B cell %lymphocyte	prostate cancer	6.16632e-10	0.0129019	47.7597
rs77762131	C	G	C	G	0.3532	-0.0699	0.045	0.02	14	96205838	0.0334	0.0364099	140254	61106	outcome	0.058	3656	96205838	1.24701e-09	14	IgD+ CD38- B cell %lymphocyte	prostate cancer	1.4491e-08	0.0107223	39.6039
rs35574803	C	T	C	T	-0.3044	0.0389	0.0562	0.0222	3	32533246	0.0298	0.192	140254	61106	outcome	0.05397	3656	32533246	1.83101e-08	3	IgD- CD27- B cell %lymphocyte	prostate cancer	8.73078e-08	0.00982959	36.2739
rs4810485	G	T	G	T	0.317	-0.0014	0.6313	0.7424	20	44747947	0.0092	0.879	140254	61106	outcome	0.02622	3656	44747947	4.97966e-33	20	IgD- CD27- B cell %lymphocyte	prostate cancer	2.68223e-32	0.0467797	179.322
rs11653761	T	G	T	G	-0.1359	-0.0007	0.592	0.6076	17	2716535	0.0085	0.9366	140254	61106	outcome	0.02451	3656	2716535	3.17497e-08	17	Memory B cell %lymphocyte	prostate cancer	4.97136e-08	0.00892176	32.8936
rs12874404	G	A	G	A	0.2221	-0.0188	0.3256	0.0595	13	108993494	0.0193	0.3308	140254	61106	outcome	0.0262	3656	108993494	3.31284e-17	13	Memory B cell %lymphocyte	prostate cancer	2.71668e-16	0.0216635	80.9113
rs115805162	T	C	T	C	-0.2833	-0.0042	0.2083	0.0657	1	161410253	0.0172	0.8093	140254	61106	outcome	0.03326	3387	161410253	2.42605e-17	1	CD62L- myeloid Dendritic Cell Absolute Count	prostate cancer	6.92504e-17	0.0264712	92.0413
rs116159922	A	G	A	G	0.8211	0.044	0.0094	0.0142	1	160977389	0.0366	0.2293	140254	61106	outcome	0.1303	3387	160977389	3.33603e-10	1	CD62L- myeloid Dendritic Cell Absolute Count	prostate cancer	1.64587e-09	0.0125559	43.0422
rs148765873	C	T	C	T	-0.3791	0.0228	0.0438	0.0111	1	161221713	0.0409	0.5765	140254	61106	outcome	0.06661	3387	161221713	1.36101e-08	1	CD62L- myeloid Dendritic Cell Absolute Count	prostate cancer	3.22852e-08	0.0120382	41.2457
rs71632979	G	A	G	A	0.8094	-0.0188	0.2449	0.1189	1	161526397	0.0135	0.1661	140254	61106	outcome	0.02787	3387	161526397	9.84011e-166	1	CD62L- myeloid Dendritic Cell Absolute Count	prostate cancer	2.39847e-165	0.242298	1082.45
rs71639910	A	G	A	G	0.401	-0.014	0.0686	0.0287	1	161937774	0.0254	0.5806	140254	61106	outcome	0.05202	3387	161937774	1.66303e-14	1	CD62L- myeloid Dendritic Cell Absolute Count	prostate cancer	5.9403e-14	0.0205485	71.0158
rs75072970	C	T	C	T	0.4285	-0.0113	0.0531	0.0425	1	161058351	0.0216	0.6026	140254	61106	outcome	0.05879	3387	161058351	3.87614e-13	1	CD62L- myeloid Dendritic Cell Absolute Count	prostate cancer	1.22772e-12	0.0184642	63.677
rs12133465	G	A	G	A	0.7179	-0.0088	0.0096	0.0297	1	195430336	0.0246	0.722	140254	61106	outcome	0.1158	3437	195430336	6.33097e-10	1	Resting CD4 regulatory T cell %CD4 regulatory T cell	prostate cancer	1.38344e-09	0.00980031	33.9972
rs138915779	A	C	A	C	1.793	0.0528	0.0035	0.0162	1	190079170	0.035	0.1315	140254	61106	outcome	0.2061	3437	190079170	4.92833e-18	1	Resting CD4 regulatory T cell %CD4 regulatory T cell	prostate cancer	8.12828e-17	0.0224252	78.7975
rs141066700	G	A	G	A	0.775	-0.0006	0.0093	0.0147	1	193453479	0.0371	0.9873	140254	61106	outcome	0.1136	3437	193453479	1.04689e-11	1	Resting CD4 regulatory T cell %CD4 regulatory T cell	prostate cancer	1.79791e-11	0.0110677	38.4431
rs147071297	A	G	A	G	1.292	-0.0531	0.0039	0.017	1	191648600	0.0342	0.1205	140254	61106	outcome	0.1788	3437	191648600	6.13762e-13	1	Resting CD4 regulatory T cell %CD4 regulatory T cell	prostate cancer	5.98304e-12	0.0129695	45.1355
rs17583875	A	G	A	G	2.714	-0.0122	0.0029	0.0252	1	197924770	0.0286	0.6697	140254	61106	outcome	0.2018	3437	197924770	3.21514e-40	1	Resting CD4 regulatory T cell %CD4 regulatory T cell	prostate cancer	3.0631e-39	0.0425977	152.834
rs17607399	T	C	T	C	0.209	-0.0008	0.1084	0.0757	2	41884212	0.0156	0.9596	140254	61106	outcome	0.03723	3437	41884212	2.14102e-08	2	Resting CD4 regulatory T cell %CD4 regulatory T cell	prostate cancer	3.21907e-08	0.00844349	29.2504
rs187089343	C	A	C	A	0.9806	-0.0371	0.0047	0.0075	1	182091538	0.0609	0.5426	140254	61106	outcome	0.1707	3437	182091538	1.00399e-08	1	Resting CD4 regulatory T cell %CD4 regulatory T cell	prostate cancer	2.52601e-08	0.00899634	31.1829
rs60220946	T	C	T	C	0.4297	-0.0346	0.0212	0.0208	1	193505625	0.036	0.3359	140254	61106	outcome	0.07742	3437	193505625	3.079e-08	1	Resting CD4 regulatory T cell %CD4 regulatory T cell	prostate cancer	1.00411e-07	0.00766285	26.5252
rs6751481	C	T	C	T	0.2946	-0.0051	0.4709	0.5181	2	38897810	0.0083	0.5413	140254	61106	outcome	0.02252	3437	38897810	3.39782e-38	2	Resting CD4 regulatory T cell %CD4 regulatory T cell	prostate cancer	4.42872e-37	0.0432476	155.271
rs7530076	A	G	A	G	-0.463	-0.0022	0.9748	0.9731	1	195825276	0.0309	0.9437	140254	61106	outcome	0.07456	3437	195825276	5.95498e-10	1	Resting CD4 regulatory T cell %CD4 regulatory T cell	prostate cancer	9.85193e-10	0.0105319	36.5623
rs114590598	T	C	T	C	2.421	-0.0156	0.0016	0.0266	1	185852065	0.0294	0.5956	140254	61106	outcome	0.4204	1857	185852065	9.84306e-09	1	Basophil Absolute Count	prostate cancer	1.68033e-08	0.018726	35.3995
rs3865444	A	C	A	C	-0.4855	0.0143	0.2132	0.3273	19	51727962	0.0086	0.0949992	140254	61106	outcome	0.03861	1857	51727962	7.50931e-35	19	Basophil Absolute Count	prostate cancer	7.51243e-34	0.0790788	159.287
rs78744187	T	C	T	C	-0.5045	-0.0077	0.0673	0.09	19	33754548	0.0151	0.609799	140254	61106	outcome	0.06722	1857	33754548	9.45584e-14	19	Basophil Absolute Count	prostate cancer	1.8583e-13	0.0319528	61.2289
rs12712610	G	A	G	A	0.183	-0.0188	0.2966	0.1786	2	38897249	0.0113	0.0953301	140254	61106	outcome	0.02834	3395	38897249	1.22301e-10	2	Terminally Differentiated CD4+ T cell Absolute Count	prostate cancer	9.90013e-10	0.0139735	48.084
rs113435341	G	A	G	A	-1.226	-0.0424	0.0032	0.0194	1	198151688	0.0318	0.1815	140254	61106	outcome	0.2117	3395	198151688	7.48704e-09	1	Central Memory CD8+ T cell Absolute Count	prostate cancer	3.64358e-08	0.0095889	32.8501
rs6707421	G	A	G	A	0.1912	-0.0165	0.3009	0.1677	2	38897781	0.0115	0.1514	140254	61106	outcome	0.02822	3395	38897781	1.4471e-11	2	Terminally Differentiated CD8+ T cell Absolute Count	prostate cancer	1.05821e-10	0.0153804	53.0008
rs61126090	G	A	G	A	-0.2671	-0.0102	0.1973	0.0141	6	32586382	0.0349	0.7698	140254	61106	outcome	0.03751	3395	32586382	1.30497e-12	6	Terminally Differentiated CD4-CD8- T cell Absolute Count	prostate cancer	3.10614e-12	0.0225974	78.4456
rs1375493	A	G	A	G	0.1517	0.0029	0.3781	0.5558	2	182323766	0.0081	0.7179	140254	61106	outcome	0.02476	3629	182323766	9.91791e-10	2	CD14+ CD16- monocyte Absolute Count	prostate cancer	2.21683e-09	0.0108225	39.6827
rs2418135	A	G	A	G	-0.1487	0.0125	0.5236	0.5275	9	113901309	0.0081	0.1236	140254	61106	outcome	0.02438	3629	113901309	1.16001e-09	9	CD14+ CD16- monocyte Absolute Count	prostate cancer	8.12459e-09	0.0110312	40.4565
rs12346499	T	C	T	C	-0.1378	0.0132	0.5233	0.5281	9	113902881	0.0081	0.1043	140254	61106	outcome	0.0244	3629	113902881	1.76799e-08	9	Monocyte Absolute Count	prostate cancer	1.10646e-07	0.0094738	34.6901
rs147174426	T	A	T	A	0.5558	-0.0105	0.1717	0.0635	1	161528012	0.0183	0.5646	140254	61106	outcome	0.03153	3629	161528012	8.34257e-67	1	CD14+ CD16- monocyte %monocyte	prostate cancer	2.42864e-65	0.0878668	349.393
rs74975395	T	C	T	C	-0.254	0.0668	0.081	0.0168	1	166026114	0.0341	0.0500196	140254	61106	outcome	0.04499	3629	166026114	1.77301e-08	1	CD14+ CD16- monocyte %monocyte	prostate cancer	1.48652e-07	0.00960501	35.1752
rs79086781	T	C	T	C	0.4888	-0.0238	0.0378	0.0367	6	100526652	0.0219	0.2773	140254	61106	outcome	0.06448	3668	100526652	4.30725e-14	6	CD8dim T cell %T cell	prostate cancer	3.10786e-13	0.01738	64.842
rs10512469	T	C	T	C	-0.2345	-0.0005	0.1639	0.191	17	33770802	0.0105	0.9585	140254	61106	outcome	0.03229	3669	33770802	4.60999e-13	17	T cell %lymphocyte	prostate cancer	9.09398e-13	0.0150714	56.1124
rs9916257	T	G	T	G	0.1918	0.0065	0.5685	0.4305	17	33797371	0.0085	0.4467	140254	61106	outcome	0.02391	3669	33797371	1.40508e-15	17	T cell %lymphocyte	prostate cancer	7.67604e-15	0.0180484	67.3999
rs2857229	G	A	G	A	0.2919	-0.0021	0.2578	0.3304	12	6900616	0.0092	0.818	140254	61106	outcome	0.02741	3668	6900616	4.29339e-26	12	CD4+CD8+ T cell %leukocyte	prostate cancer	1.97584e-25	0.0326063	123.564
rs28366280	G	A	G	A	0.2152	-0.0244	0.2493	0.172	6	32560262	0.0111	0.0273602	140254	61106	outcome	0.03648	3652	32560262	3.96397e-09	6	CD4+ CD8dim T cell Absolute Count	prostate cancer	4.66061e-08	0.0173342	64.3858
rs35290870	C	G	C	G	-0.364	-0.0032	0.1955	0.2409	2	87023103	0.0104	0.7613	140254	61106	outcome	0.03114	3652	87023103	5.05592e-31	2	CD4+ CD8dim T cell Absolute Count	prostate cancer	3.37601e-30	0.0416779	158.74
rs4959028	G	A	G	A	0.2258	-0.0024	0.23	0.0632	6	32383138	0.0164	0.8828	140254	61106	outcome	0.03391	3652	32383138	3.19227e-11	6	CD4+ CD8dim T cell Absolute Count	prostate cancer	6.30197e-11	0.0180591	67.128
rs28366280	G	A	G	A	0.2355	-0.0244	0.2492	0.172	6	32560262	0.0111	0.0273602	140254	61106	outcome	0.03527	3668	32560262	2.81384e-11	6	CD4+ CD8dim T cell %leukocyte	prostate cancer	4.76905e-10	0.0207532	77.6934
rs35290870	C	G	C	G	-0.3848	-0.0032	0.1948	0.2409	2	87023103	0.0104	0.7613	140254	61106	outcome	0.03036	3668	87023103	4.76212e-36	2	CD4+ CD8dim T cell %leukocyte	prostate cancer	3.71758e-35	0.0464508	178.584
rs4959028	G	A	G	A	0.2689	-0.0024	0.2297	0.0632	6	32383138	0.0164	0.8828	140254	61106	outcome	0.0327	3668	32383138	2.72772e-16	6	CD4+ CD8dim T cell %leukocyte	prostate cancer	7.10797e-16	0.0255878	96.2681
rs115805162	T	C	T	C	0.2582	-0.0042	0.2076	0.0657	1	161410253	0.0172	0.8093	140254	61106	outcome	0.03216	3596	161410253	1.32008e-15	1	HLA DR+ Natural Killer %Natural Killer	prostate cancer	3.7057e-15	0.0219338	80.598
rs3933769	G	A	G	A	0.1574	0.0046	0.6143	0.7568	1	161559327	0.0111	0.6742	140254	61106	outcome	0.02744	3596	161559327	1.04299e-08	1	HLA DR+ Natural Killer %Natural Killer	prostate cancer	2.2816e-08	0.01174	42.6949
rs509749	G	A	G	A	-0.1543	0.0012	0.4066	0.4531	1	160793560	0.0088	0.8878	140254	61106	outcome	0.02638	3596	160793560	5.41302e-09	1	HLA DR+ Natural Killer %Natural Killer	prostate cancer	9.2391e-09	0.0114889	41.7708
rs71632989	G	T	G	T	-0.6848	-0.0188	0.2474	0.1189	1	161533055	0.0135	0.1648	140254	61106	outcome	0.02772	3596	161533055	1.30317e-124	1	HLA DR+ Natural Killer %Natural Killer	prostate cancer	2.11446e-122	0.174631	760.416
rs7180804	A	G	A	G	-0.2525	-0.0183	0.2162	0.2477	15	80259074	0.0096	0.0563495	140254	61106	outcome	0.03019	3596	80259074	8.73575e-17	15	HLA DR+ Natural Killer %Natural Killer	prostate cancer	2.19845e-15	0.021608	79.3741
rs865239	G	A	G	A	-0.1371	-0.0197	0.5004	0.5295	1	156896164	0.0081	0.01546	140254	61106	outcome	0.02509	3596	156896164	4.96604e-08	1	HLA DR+ Natural Killer %Natural Killer	prostate cancer	5.64216e-07	0.0093982	34.0976
rs9916257	T	G	T	G	0.1457	0.0065	0.5698	0.4305	17	33797371	0.0085	0.4467	140254	61106	outcome	0.02506	3596	33797371	6.72094e-09	17	HLA DR+ Natural Killer %Natural Killer	prostate cancer	2.01909e-08	0.0104074	37.7975
rs116794175	C	T	C	T	-1.073	-0.0242	0.0042	0.0063	1	194010208	0.0618	0.696	140254	61106	outcome	0.1963	3440	194010208	4.98506e-08	1	CD28+ CD45RA- CD8+ T cell %T cell	prostate cancer	9.75581e-08	0.00963054	33.4318
rs17583875	A	G	A	G	-2.154	-0.0122	0.0029	0.0252	1	197924770	0.0286	0.6697	140254	61106	outcome	0.2288	3440	197924770	8.59607e-21	1	CD28+ CD45RA- CD8+ T cell %T cell	prostate cancer	3.77682e-20	0.0268323	94.793
rs60220946	T	C	T	C	-0.5154	-0.0346	0.0212	0.0208	1	193505625	0.036	0.3359	140254	61106	outcome	0.0867	3440	193505625	3.039e-09	1	CD28+ CD45RA- CD8+ T cell %T cell	prostate cancer	1.10614e-08	0.0110242	38.3238
rs117430146	C	G	C	G	0.3149	0.0714	0.0562	0.0133	22	41998660	0.0367	0.0515395	140254	61106	outcome	0.05565	3645	41998660	1.65402e-08	22	BAFF-R on IgD+ CD38- B cell	prostate cancer	1.37857e-07	0.0105194	38.7296
rs117705111	A	G	A	G	-0.7379	0.0291	0.0364	0.0315	22	41957510	0.0236	0.2178	140254	61106	outcome	0.06516	3645	41957510	2.99709e-29	22	BAFF-R on IgD+ CD38- B cell	prostate cancer	9.4629e-28	0.0381965	144.676
rs149806587	G	A	G	A	-0.5355	-0.0553	0.0527	0.0118	22	40774205	0.0419	0.1866	140254	61106	outcome	0.05733	3645	40774205	1.61213e-20	22	BAFF-R on IgD+ CD38- B cell	prostate cancer	2.85823e-19	0.0286317	107.38
rs182240980	T	A	T	A	-1.496	0.0018	0.0989	0.0803	22	42317478	0.0148	0.903	140254	61106	outcome	0.03377	3645	42317478	1e-200	22	BAFF-R on IgD+ CD38- B cell	prostate cancer	0	0.398899	2417.54
rs1894588	T	C	T	C	-0.5121	-0.0178	0.0621	0.0361	22	40629980	0.0225	0.4298	140254	61106	outcome	0.05103	3645	40629980	2.1508e-23	22	BAFF-R on IgD+ CD38- B cell	prostate cancer	2.13483e-22	0.0305483	114.794
rs5757678	T	C	T	C	0.2107	0.0007	0.6417	0.7323	22	39843409	0.0091	0.9399	140254	61106	outcome	0.02589	3645	39843409	5.47394e-16	22	BAFF-R on IgD+ CD38- B cell	prostate cancer	1.27343e-15	0.0204145	75.9197
rs5759077	A	T	A	T	-0.4487	0.0297	0.1407	0.0801	22	43391816	0.0148	0.04409	140254	61106	outcome	0.03596	3645	43391816	5.1713e-35	22	BAFF-R on IgD+ CD38- B cell	prostate cancer	1.02742e-32	0.0486834	186.43
rs76146864	T	C	T	C	-0.6949	-0.0253	0.0263	0.022	22	40246055	0.0294	0.3887	140254	61106	outcome	0.07785	3645	40246055	6.85804e-19	22	BAFF-R on IgD+ CD38- B cell	prostate cancer	5.49807e-18	0.0247318	92.3827
rs117705111	A	G	A	G	-0.7129	0.0291	0.0346	0.0315	22	41957510	0.0236	0.2178	140254	61106	outcome	0.09169	1837	41957510	1.24595e-14	22	BAFF-R on IgD+ CD38- naive B cell	prostate cancer	4.67137e-14	0.0339524	64.4923
rs149806587	G	A	G	A	-0.5047	-0.0553	0.0517	0.0118	22	40774205	0.0419	0.1866	140254	61106	outcome	0.07979	1837	40774205	3.176e-10	22	BAFF-R on IgD+ CD38- naive B cell	prostate cancer	9.955e-10	0.0249766	47.0061
rs1894588	T	C	T	C	-0.607	-0.0178	0.061	0.0361	22	40629980	0.0225	0.4298	140254	61106	outcome	0.07005	1837	40629980	9.72076e-18	22	BAFF-R on IgD+ CD38- naive B cell	prostate cancer	2.69066e-17	0.0422088	80.8664
rs2018340	A	G	A	G	-0.472	0.0313	0.1375	0.0795	22	43390319	0.0148	0.0339399	140254	61106	outcome	0.04978	1837	43390319	7.45247e-21	22	BAFF-R on IgD+ CD38- naive B cell	prostate cancer	8.84932e-20	0.0528416	102.374
rs5757678	T	C	T	C	0.2286	0.0007	0.6486	0.7323	22	39843409	0.0091	0.9399	140254	61106	outcome	0.03604	1837	39843409	2.81903e-10	22	BAFF-R on IgD+ CD38- naive B cell	prostate cancer	3.64243e-10	0.0238211	44.7783
rs6002543	G	C	G	C	-1.52	0.0057	0.0947	0.0813	22	42320547	0.0147	0.699301	140254	61106	outcome	0.0467	1837	42320547	9.09913e-184	22	BAFF-R on IgD+ CD38- naive B cell	prostate cancer	6.82795e-195	0.39615	1203.83
rs76146864	T	C	T	C	-0.7454	-0.0253	0.025	0.022	22	40246055	0.0294	0.3887	140254	61106	outcome	0.1101	1837	40246055	1.741e-11	22	BAFF-R on IgD+ CD38- naive B cell	prostate cancer	4.13698e-11	0.0270865	51.0876
rs117086217	G	A	G	A	-0.4887	-0.0397	0.0343	0.0242	22	39876838	0.0302	0.188	140254	61106	outcome	0.06701	3657	39876838	3.72735e-13	22	BAFF-R on IgD- CD38- B cell	prostate cancer	3.12573e-12	0.0158216	58.7577
rs118137006	C	A	C	A	-0.7814	0.0481	0.015	0.0135	22	40727723	0.0419	0.2509	140254	61106	outcome	0.1043	3657	40727723	8.26609e-14	22	BAFF-R on IgD- CD38- B cell	prostate cancer	6.3203e-13	0.0180428	67.1582
rs142780018	A	G	A	G	-0.3333	-0.0801	0.0463	0.0134	22	44395926	0.0429	0.0618102	140254	61106	outcome	0.05866	3657	44395926	1.438e-08	22	BAFF-R on IgD- CD38- B cell	prostate cancer	1.14051e-07	0.00981055	36.2128
rs2142827	A	G	A	G	-0.3562	0.0056	0.1416	0.2342	22	42874781	0.0115	0.6265	140254	61106	outcome	0.03572	3657	42874781	3.97558e-23	22	BAFF-R on IgD- CD38- B cell	prostate cancer	2.4404e-22	0.030844	116.323
rs5758649	T	C	T	C	-0.6648	0.0151	0.0871	0.0275	22	42605548	0.0261	0.5629	140254	61106	outcome	0.04459	3657	42605548	7.61728e-49	22	BAFF-R on IgD- CD38- B cell	prostate cancer	1.63902e-47	0.0702835	276.306
rs73165129	T	C	T	C	-1.461	0.0018	0.099	0.0803	22	42315371	0.0148	0.904	140254	61106	outcome	0.03414	3657	42315371	1e-200	22	BAFF-R on IgD- CD38- B cell	prostate cancer	0	0.380794	2247.72
rs75056525	A	G	A	G	-0.6176	0.0613	0.0762	0.0266	22	43349884	0.0248	0.01341	140254	61106	outcome	0.04729	3657	43349884	3.88061e-38	22	BAFF-R on IgD- CD38- B cell	prostate cancer	2.64184e-35	0.0537004	207.413
rs9614288	T	A	T	A	-0.313	0.0152	0.2346	0.2413	22	44297686	0.0109	0.1634	140254	61106	outcome	0.02906	3657	44297686	1.19399e-26	22	BAFF-R on IgD- CD38- B cell	prostate cancer	4.01033e-25	0.0351832	133.284
rs9400058	G	A	G	A	-0.432	0.0048	0.0651	0.0748	6	107164076	0.0161	0.766699	140254	61106	outcome	0.05081	3638	107164076	2.65828e-17	6	CD24 on IgD+ CD38- B cell	prostate cancer	8.94043e-17	0.0227166	84.5176
rs117430146	C	G	C	G	0.3083	0.0714	0.056	0.0133	22	41998660	0.0367	0.0515395	140254	61106	outcome	0.05583	3660	41998660	3.60504e-08	22	BAFF-R on B cell	prostate cancer	2.85036e-07	0.0100493	37.1336
rs117705111	A	G	A	G	-0.7406	0.0291	0.0365	0.0315	22	41957510	0.0236	0.2178	140254	61106	outcome	0.06518	3660	41957510	1.97197e-29	22	BAFF-R on B cell	prostate cancer	6.35486e-28	0.0385782	146.782
rs149806587	G	A	G	A	-0.5338	-0.0553	0.0526	0.0118	22	40774205	0.0419	0.1866	140254	61106	outcome	0.05744	3660	40774205	2.49919e-20	22	BAFF-R on B cell	prostate cancer	4.37822e-19	0.0283992	106.921
rs1801274	G	A	G	A	-0.1724	-0.0078	0.3253	0.5082	1	161479745	0.0082	0.3417	140254	61106	outcome	0.02698	3660	161479745	1.86299e-10	1	BAFF-R on B cell	prostate cancer	8.04521e-10	0.0130467	48.3556
rs1894588	T	C	T	C	-0.5142	-0.0178	0.0622	0.0361	22	40629980	0.0225	0.4298	140254	61106	outcome	0.05113	3660	40629980	1.70805e-23	22	BAFF-R on B cell	prostate cancer	1.74801e-22	0.0308457	116.425
rs5757678	T	C	T	C	0.2136	0.0007	0.6419	0.7323	22	39843409	0.0091	0.9399	140254	61106	outcome	0.02594	3660	39843409	2.43893e-16	22	BAFF-R on B cell	prostate cancer	5.92689e-16	0.0209751	78.3708
rs5759079	A	G	A	G	-0.4435	0.0295	0.1407	0.0795	22	43393437	0.0148	0.0464505	140254	61106	outcome	0.03602	3660	43393437	3.74973e-34	22	BAFF-R on B cell	prostate cancer	6.78907e-32	0.0475616	182.668
rs73165129	T	C	T	C	-1.496	0.0018	0.099	0.0803	22	42315371	0.0148	0.904	140254	61106	outcome	0.03385	3660	42315371	1e-200	22	BAFF-R on B cell	prostate cancer	0	0.399258	2431.13
rs76146864	T	C	T	C	-0.7056	-0.0253	0.0264	0.022	22	40246055	0.0294	0.3887	140254	61106	outcome	0.07783	3660	40246055	1.97015e-19	22	BAFF-R on B cell	prostate cancer	1.65818e-18	0.0255936	96.0805
rs1723018	G	A	G	A	0.4235	0.0105	0.4562	0.378	1	167433420	0.0083	0.206	140254	61106	outcome	0.02586	2910	167433420	9.83785e-58	1	CD3 on Central Memory CD8+ T cell	prostate cancer	3.81433e-56	0.088988	284.054
rs58313897	C	T	C	T	0.2546	-0.0091	0.1052	0.116	1	167113728	0.0127	0.4714	140254	61106	outcome	0.04309	2910	167113728	3.83902e-09	1	CD3 on Central Memory CD8+ T cell	prostate cancer	9.83691e-09	0.0122036	35.9265
rs117913408	G	A	G	A	0.4285	0.0638	0.0321	0.0197	6	102173117	0.0388	0.0999102	140254	61106	outcome	0.07737	3113	102173117	3.30598e-08	6	CD3 on Natural Killer T	prostate cancer	1.73317e-07	0.0114095	35.9047
rs79086781	T	C	T	C	0.4289	-0.0238	0.0387	0.0367	6	100526652	0.0219	0.2773	140254	61106	outcome	0.06851	3113	100526652	4.35602e-10	6	CD3 on Natural Killer T	prostate cancer	1.76436e-09	0.0136871	43.1715
rs62183989	T	C	T	C	-0.4077	0.0094	0.1983	0.1701	2	204609402	0.0109	0.391	140254	61106	outcome	0.03293	2920	204609402	2.32488e-34	2	CD28 on activated & secreting CD4 regulatory T cell	prostate cancer	2.65699e-33	0.0528501	162.822
rs62183989	T	C	T	C	-0.3589	0.0094	0.1983	0.1701	2	204609402	0.0109	0.391	140254	61106	outcome	0.03258	2920	204609402	1.13006e-27	2	CD28 on activated CD4 regulatory T cell	prostate cancer	9.74603e-27	0.0409554	124.611
rs1573734	T	C	T	C	-0.182	0.0107	0.3265	0.5438	16	423619	0.0085	0.2088	140254	61106	outcome	0.02858	2920	423619	2.19599e-10	16	CD127 on CD28+ CD4+ T cell	prostate cancer	1.01132e-09	0.0145678	43.1372
rs16899999	G	C	G	C	-0.2835	-0.0324	0.1101	0.1345	5	35886731	0.0117	0.00549098	140254	61106	outcome	0.04291	2920	35886731	4.66659e-11	5	CD127 on CD28+ CD4+ T cell	prostate cancer	8.977e-10	0.0157494	46.6922
rs28680958	A	G	A	G	0.1855	-0.0085	0.2366	0.2167	1	173848808	0.0098	0.3888	140254	61106	outcome	0.03217	2920	173848808	8.93799e-09	1	CD127 on CD28+ CD4+ T cell	prostate cancer	2.52363e-08	0.0124304	36.7284
rs7078614	T	G	T	G	0.182	-0.0027	0.3414	0.3974	10	6075831	0.0081	0.74	140254	61106	outcome	0.02618	3434	6075831	4.31221e-12	10	CD25 on CD39+ CD4 regulatory T cell	prostate cancer	1.04734e-11	0.0148956	51.8947
rs9302635	C	T	C	T	0.2953	-0.0106	0.1984	0.1833	16	72144174	0.0104	0.3094	140254	61106	outcome	0.03367	3112	72144174	2.86682e-18	16	CD4 on monocyte	prostate cancer	2.10322e-17	0.0277368	88.7223
rs10887024	T	A	T	A	-0.1469	0.0199	0.3512	0.3278	10	123688152	0.0085	0.0191399	140254	61106	outcome	0.02633	3629	123688152	2.60298e-08	10	CD40 on monocytes	prostate cancer	2.92578e-07	0.0098342	36.0229
rs113063605	G	A	G	A	0.2178	0.0088	0.1106	0.1368	1	161246613	0.0123	0.4742	140254	61106	outcome	0.03952	3629	161246613	3.83301e-08	1	CD40 on monocytes	prostate cancer	1.04138e-07	0.0093325	34.1678
rs1801274	G	A	G	A	0.5089	-0.0078	0.3258	0.5082	1	161479745	0.0082	0.3417	140254	61106	outcome	0.02554	3629	161479745	7.00326e-84	1	CD40 on monocytes	prostate cancer	5.76759e-82	0.113772	465.625
rs34658867	C	A	C	A	0.3665	-0.0112	0.0455	0.0185	20	44977184	0.0378	0.7671	140254	61106	outcome	0.06056	3629	44977184	1.57899e-09	20	CD40 on monocytes	prostate cancer	3.27403e-09	0.0116672	42.8163
rs745307	A	G	A	G	0.715	-0.0015	0.146	0.2562	20	44747086	0.0093	0.8745	140254	61106	outcome	0.0334	3629	44747086	7.29794e-96	20	CD40 on monocytes	prostate cancer	4.6573e-95	0.127483	529.94
rs115805162	T	C	T	C	0.306	-0.0042	0.2111	0.0657	1	161410253	0.0172	0.8093	140254	61106	outcome	0.03117	3617	161410253	1.80717e-22	1	CD16 on CD14+ CD16+ monocyte	prostate cancer	7.22377e-22	0.0311877	116.373
rs187197560	T	C	T	C	-0.5269	-0.0428	0.0299	0.0105	1	161006723	0.0579	0.4605	140254	61106	outcome	0.07878	3617	161006723	2.60315e-11	1	CD16 on CD14+ CD16+ monocyte	prostate cancer	9.66573e-11	0.0161055	59.1744
rs71632979	G	A	G	A	-0.8542	-0.0188	0.2456	0.1189	1	161526397	0.0135	0.1661	140254	61106	outcome	0.02593	3617	161526397	1e-200	1	CD16 on CD14+ CD16+ monocyte	prostate cancer	4.00217e-209	0.270383	1339.65
rs71639910	A	G	A	G	-0.3755	-0.014	0.0702	0.0287	1	161937774	0.0254	0.5806	140254	61106	outcome	0.0488	3617	161937774	1.82516e-14	1	CD16 on CD14+ CD16+ monocyte	prostate cancer	6.97106e-14	0.0184067	67.7881
rs75072970	C	T	C	T	-0.3364	-0.0113	0.0496	0.0425	1	161058351	0.0216	0.6026	140254	61106	outcome	0.0578	3617	161058351	6.40295e-09	1	CD16 on CD14+ CD16+ monocyte	prostate cancer	1.56888e-08	0.0106692	38.9849
rs147174426	T	A	T	A	-0.3104	-0.0105	0.1692	0.0635	1	161528012	0.0183	0.5646	140254	61106	outcome	0.03343	3618	161528012	2.64972e-20	1	HLA DR on CD14+ CD16+ monocyte	prostate cancer	1.57509e-19	0.0270876	100.676
rs62395272	T	C	T	C	-0.2623	-0.0078	0.2848	0.0949	6	31394424	0.0135	0.5622	140254	61106	outcome	0.03321	3618	31394424	3.7653e-15	6	HLA DR on CD14+ CD16+ monocyte	prostate cancer	1.54863e-14	0.0280281	104.272
rs6917212	G	C	G	C	-0.5221	0.0222	0.7769	0.5817	6	32583005	0.0081	0.00623405	140254	61106	outcome	0.03191	3618	32583005	4.09072e-58	6	HLA DR on CD14+ CD16+ monocyte	prostate cancer	2.34469e-54	0.0944935	377.345
rs6934244	A	C	A	C	0.4143	-0.0193	0.1551	0.0368	6	33024032	0.0238	0.4173	140254	61106	outcome	0.039	3618	33024032	5.66239e-26	6	HLA DR on CD14+ CD16+ monocyte	prostate cancer	6.69124e-25	0.044986	170.332
rs143407337	T	C	T	C	0.2427	-0.0357	0.2142	0.0389	7	1095701	0.0243	0.1415	140254	61106	outcome	0.03394	2871	1095701	1.09698e-12	7	CCR2 on CD62L+ plasmacytoid Dendritic Cell	prostate cancer	7.44814e-12	0.019829	58.0403
rs3092963	G	A	G	A	-0.4395	-0.0034	0.4183	0.3078	3	46396938	0.0089	0.705801	140254	61106	outcome	0.0274	2871	46396938	1.56099e-55	3	CCR2 on CD62L+ plasmacytoid Dendritic Cell	prostate cancer	8.04961e-55	0.0940015	297.672
rs11766311	A	G	A	G	-0.1526	0.016	0.411	0.3593	7	77134132	0.0089	0.0715599	140254	61106	outcome	0.02783	2920	77134132	4.548e-08	7	CD39 on granulocyte	prostate cancer	2.46516e-07	0.0112745	33.2741
rs7073937	T	C	T	C	-0.2043	-0.0035	0.2247	0.1958	10	97469109	0.0102	0.7338	140254	61106	outcome	0.03414	2920	97469109	2.44602e-09	10	CD39 on granulocyte	prostate cancer	4.6046e-09	0.0145425	43.0613
rs115780495	G	T	G	T	0.34	-0.0115	0.1868	0.0175	6	32501627	0.0355	0.746299	140254	61106	outcome	0.05429	2872	32501627	4.35402e-10	6	SSC-A on myeloid Dendritic Cell	prostate cancer	8.32532e-10	0.0351206	104.465
rs139529340	G	A	G	A	0.2016	-0.0227	0.2308	0.1221	1	161563554	0.0138	0.09941	140254	61106	outcome	0.03334	2872	161563554	1.679e-09	1	SSC-A on myeloid Dendritic Cell	prostate cancer	9.50666e-09	0.0144307	42.0224
rs139947059	A	G	A	G	0.4676	0.0572	0.0266	0.0068	12	25434182	0.0549	0.2967	140254	61106	outcome	0.08405	2872	25434182	2.88702e-08	12	SSC-A on myeloid Dendritic Cell	prostate cancer	8.84479e-08	0.0113228	32.8685
rs1800973	A	C	A	C	-0.3487	-0.0181	0.0841	0.0717	12	69744014	0.0175	0.2999	140254	61106	outcome	0.0505	2872	69744014	6.14469e-12	12	SSC-A on myeloid Dendritic Cell	prostate cancer	2.57587e-11	0.0187317	54.7863
rs4910742	A	G	A	G	0.3805	0.0006	0.9244	0.9321	11	5306509	0.0179	0.9711	140254	61106	outcome	0.05405	2872	5306509	2.38781e-12	11	SSC-A on myeloid Dendritic Cell	prostate cancer	3.83853e-12	0.0202358	59.2763
rs80297185	T	C	T	C	-0.4081	-0.0026	0.0425	0.0125	11	5488177	0.0386	0.9472	140254	61106	outcome	0.07152	2872	5488177	1.268e-08	11	SSC-A on myeloid Dendritic Cell	prostate cancer	1.82873e-08	0.0135547	39.4366
rs12449199	G	T	G	T	-0.2433	-0.0041	0.3064	0.3022	16	10968440	0.0093	0.655901	140254	61106	outcome	0.02779	3060	10968440	3.30293e-18	16	HLA DR on HLA DR+ T cell	prostate cancer	1.13371e-17	0.0251601	78.9253
rs56262516	A	G	A	G	0.23	-0.0106	0.2757	0.0654	6	29930939	0.016	0.5076	140254	61106	outcome	0.03381	2920	29930939	1.23509e-11	6	CD8 on CD28- CD8+ T cell	prostate cancer	3.59986e-11	0.0211272	62.9796
rs7425430	G	A	G	A	-0.2188	-0.0012	0.2317	0.3167	2	87056480	0.0098	0.9017	140254	61106	outcome	0.03213	2920	87056480	1.18495e-11	2	CD8 on CD28- CD8+ T cell	prostate cancer	2.03141e-11	0.0170444	50.5979
rs116844769	A	G	A	G	0.2839	-0.0034	0.0662	0.0421	14	65713895	0.0225	0.8798	140254	61106	outcome	3657	0.05066	14	2.26199e-08	65713895	Memory B cell %B cell	prostate cancer	3.80451e-08	0.00996489	36.7883
rs72635970	G	T	G	T	0.3572	0.018	0.0444	0.012	2	73868977	0.0473	0.704001	140254	61106	outcome	3657	0.06109	2	5.44703e-09	73868977	Memory B cell %B cell	prostate cancer	1.18403e-08	0.0108271	40.0062
rs12874404	G	A	G	A	0.1963	-0.0188	0.3256	0.0595	13	108993494	0.0193	0.3308	140254	61106	outcome	3656	0.02601	13	5.61824e-14	108993494	IgD+ CD24+ B cell Absolute Count	prostate cancer	3.45773e-13	0.0169228	62.9004
rs45487297	A	T	A	T	0.6623	-0.0117	0.0135	0.0137	14	30153119	0.037	0.7519	140254	61106	outcome	3042	0.1201	14	3.74498e-08	30153119	CD62L- monocyte %monocyte	prostate cancer	6.67238e-08	0.0116834	35.9375
rs4987360	G	A	G	A	0.3359	0.0054	0.2763	0.2999	1	169664867	0.0088	0.5398	140254	61106	outcome	3042	0.02969	1	4.36918e-29	169664867	CD62L- monocyte %monocyte	prostate cancer	2.9058e-28	0.0451221	143.653
rs7139370	T	C	T	C	0.2947	0.0072	0.0676	0.1094	13	109976273	0.0133	0.5898	140254	61106	outcome	3042	0.0539	13	4.96295e-08	109976273	CD62L- monocyte %monocyte	prostate cancer	1.03375e-07	0.0109481	33.6507
rs9859349	A	G	A	G	0.227	-0.0076	0.1205	0.1036	3	31661754	0.0131	0.563101	140254	61106	outcome	3042	0.04151	3	4.89204e-08	31661754	CD62L- monocyte %monocyte	prostate cancer	1.06043e-07	0.0109221	33.5697
rs56199187	T	C	T	C	0.7548	-0.0192	0.2441	0.1179	1	161520931	0.0136	0.1567	140254	61106	outcome	3410	0.02809	1	2.11349e-144	161520931	CD62L- Dendritic Cell %Dendritic Cell	prostate cancer	4.12727e-143	0.210245	907.263
rs6537835	A	G	A	G	-0.2072	-0.0167	0.8488	0.9027	1	115108914	0.014	0.2337	140254	61106	outcome	3410	0.03711	1	2.54302e-08	115108914	CD62L- Dendritic Cell %Dendritic Cell	prostate cancer	1.01559e-07	0.0110196	37.9733
rs75072970	C	T	C	T	0.3832	-0.0113	0.0531	0.0425	1	161058351	0.0216	0.6026	140254	61106	outcome	3410	0.05865	1	7.35699e-11	161058351	CD62L- Dendritic Cell %Dendritic Cell	prostate cancer	2.00678e-10	0.0147666	51.0787
rs1571025	G	A	G	A	0.2054	-0.0199	0.1766	0.1253	10	6134869	0.0122	0.1018	140254	61106	outcome	3437	0.03486	10	4.16898e-09	6134869	CD4 regulatory T cell %T cell	prostate cancer	2.72053e-08	0.0122697	42.6698
rs10882701	C	A	C	A	-0.3681	-0.0017	0.5141	0.5719	10	97741071	0.009	0.8465	140254	61106	outcome	3437	0.02438	10	6.65733e-50	97741071	CD39+ resting CD4 regulatory T cell %resting CD4 regulatory T cell	prostate cancer	4.43324e-49	0.0676949	249.416
rs11188757	C	A	C	A	-0.2044	0.0069	0.2207	0.2947	10	98205222	0.009	0.443	140254	61106	outcome	3437	0.03049	10	2.35722e-11	98205222	CD39+ resting CD4 regulatory T cell %resting CD4 regulatory T cell	prostate cancer	8.6178e-11	0.0143714	50.0855
rs115328872	A	G	A	G	1.259	-0.012	0.0036	0.0252	1	197921246	0.0286	0.674401	140254	61106	outcome	3437	0.199	1	2.81598e-10	197921246	CD39+ resting CD4 regulatory T cell %resting CD4 regulatory T cell	prostate cancer	6.71227e-10	0.0113715	39.5104
rs12777195	G	A	G	A	0.2008	-0.012	0.3595	0.3923	10	96998743	0.0083	0.1469	140254	61106	outcome	3437	0.02654	10	4.86407e-14	96998743	CD39+ resting CD4 regulatory T cell %resting CD4 regulatory T cell	prostate cancer	4.83781e-13	0.0185684	64.9893
rs1923692	G	T	G	T	-0.5718	0.0217	0.9453	0.9767	10	98173715	0.0325	0.5047	140254	61106	outcome	3437	0.0529	10	8.3888e-27	98173715	CD39+ resting CD4 regulatory T cell %resting CD4 regulatory T cell	prostate cancer	7.38929e-26	0.0338123	120.21
rs192831774	T	A	T	A	0.5858	-0.0194	0.0313	0.0099	10	95387682	0.0536	0.7173	140254	61106	outcome	3437	0.07135	10	3.07326e-16	95387682	CD39+ resting CD4 regulatory T cell %resting CD4 regulatory T cell	prostate cancer	9.89949e-16	0.0208095	72.9998
rs72809757	G	A	G	A	0.5451	0.0229	0.0588	0.0246	10	97285715	0.0262	0.3819	140254	61106	outcome	3437	0.05251	10	7.06968e-25	97285715	CD39+ resting CD4 regulatory T cell %resting CD4 regulatory T cell	prostate cancer	7.76221e-24	0.0328883	116.813
rs7245846	A	G	A	G	-0.3128	0.0124	0.2236	0.3534	19	51731176	0.0085	0.1466	140254	61106	outcome	1858	0.03922	19	2.6339e-15	51731176	CD33+ HLA DR+ CD14- %CD33+ HLA DR+	prostate cancer	1.2589e-14	0.033972	65.2693
rs115536607	T	C	T	C	0.3978	0.0275	0.0545	0.0411	6	101417409	0.02	0.1682	140254	61106	outcome	3668	0.05455	6	3.72907e-13	101417409	CD8dim Natural Killer T %T cell	prostate cancer	3.37282e-12	0.0163086	60.7787
rs117147408	G	A	G	A	0.7354	0.0222	0.0275	0.0233	6	101980039	0.0304	0.465799	140254	61106	outcome	3668	0.07599	6	6.79047e-22	101980039	CD8dim Natural Killer T %T cell	prostate cancer	5.6937e-21	0.0289267	109.204
rs77738700	A	G	A	G	-0.3265	-0.0034	0.1067	0.0318	11	112751407	0.0261	0.8964	140254	61106	outcome	3668	0.03954	11	2.05779e-16	112751407	CD8dim Natural Killer T %T cell	prostate cancer	5.28834e-16	0.0203216	76.0444
rs79251210	A	G	A	G	0.5985	-0.0303	0.0378	0.0346	6	100468602	0.0231	0.19	140254	61106	outcome	3668	0.06505	6	5.80898e-20	100468602	CD8dim Natural Killer T %T cell	prostate cancer	9.78349e-19	0.0260565	98.0786
rs9488834	A	G	A	G	0.352	-0.0002	0.0465	0.0192	6	97889936	0.031	0.9954	140254	61106	outcome	3668	0.05867	6	2.169e-09	97889936	CD8dim Natural Killer T %T cell	prostate cancer	3.39447e-09	0.0109872	40.7267
rs10512469	T	C	T	C	0.249	-0.0005	0.1639	0.191	17	33770802	0.0105	0.9585	140254	61106	outcome	3669	0.03122	17	1.97606e-15	33770802	Natural Killer %lymphocyte	prostate cancer	4.42857e-15	0.0169928	63.3899
rs183053322	T	C	T	C	-0.408	0.0052	0.0354	0.0124	1	25076059	0.0443	0.9059	140254	61106	outcome	3669	0.06431	1	2.51299e-10	25076059	Natural Killer %lymphocyte	prostate cancer	4.60644e-10	0.0113684	42.1674
rs9916257	T	G	T	G	-0.2323	0.0065	0.5685	0.4305	17	33797371	0.0085	0.4467	140254	61106	outcome	3669	0.02306	17	1.51391e-23	33797371	Natural Killer %lymphocyte	prostate cancer	1.42903e-22	0.0264752	99.7249
rs34546581	A	G	A	G	0.1659	-0.0031	0.1927	0.2409	2	87021659	0.0104	0.7615	140254	61106	outcome	3440	0.02878	2	8.92401e-09	87021659	CD28+ CD4-CD8- T cell %T cell	prostate cancer	1.71042e-08	0.00856327	29.6948
rs10736092	G	A	G	A	1.014	0.0045	0.469	0.5424	10	97570315	0.0081	0.575999	140254	61106	outcome	3440	0.01774	10	1e-200	97570315	CD39+ CD4+ T cell %T cell	prostate cancer	0	0.512122	3608.84
rs10786199	A	G	A	G	-0.2028	-0.0019	0.2888	0.4001	10	97069472	0.0083	0.8149	140254	61106	outcome	3440	0.02738	10	1.62106e-13	97069472	CD39+ CD4+ T cell %T cell	prostate cancer	3.81534e-13	0.0168949	59.0828
rs10882701	C	A	C	A	-0.3969	-0.0017	0.5141	0.5719	10	97741071	0.009	0.8465	140254	61106	outcome	3440	0.02378	10	3.17322e-60	97741071	CD39+ CD4+ T cell %T cell	prostate cancer	2.49754e-59	0.0787022	293.692
rs12268044	T	C	T	C	-0.172	0.0098	0.3438	0.3899	10	98794615	0.0089	0.2683	140254	61106	outcome	3440	0.02583	10	3.155e-11	98794615	CD39+ CD4+ T cell %T cell	prostate cancer	1.62145e-10	0.0133484	46.5126
rs72809762	T	C	T	C	0.4022	0.0026	0.0674	0.0354	10	97294154	0.0221	0.905	140254	61106	outcome	3440	0.0483	10	1.17598e-16	97294154	CD39+ CD4+ T cell %T cell	prostate cancer	2.83531e-16	0.0203362	71.3671
rs7918541	G	A	G	A	-0.5209	-0.005	0.9472	0.9857	10	98168559	0.0386	0.8973	140254	61106	outcome	3440	0.0533	10	2.85825e-22	98168559	CD39+ CD4+ T cell %T cell	prostate cancer	8.82529e-22	0.0271403	95.9113
rs11579717	A	G	A	G	1.307	0.011	0.0044	0.0434	1	199999121	0.0222	0.62	140254	61106	outcome	3440	0.1858	1	2.37411e-12	199999121	CD28+ CD45RA+ CD8dim T cell %CD8dim T cell	prostate cancer	7.10145e-12	0.0149664	52.2364
rs116794175	C	T	C	T	1.191	-0.0242	0.0042	0.0063	1	194010208	0.0618	0.696	140254	61106	outcome	3440	0.1918	1	5.92107e-10	194010208	CD28+ CD45RA+ CD8dim T cell %CD8dim T cell	prostate cancer	1.34427e-09	0.0118652	41.2824
rs12712610	G	A	G	A	0.1611	-0.0188	0.2977	0.1786	2	38897249	0.0113	0.0953301	140254	61106	outcome	3440	0.02726	2	3.79603e-09	38897249	CD28+ CD45RA+ CD8dim T cell %CD8dim T cell	prostate cancer	2.53788e-08	0.0108523	37.7196
rs146620586	T	G	T	G	2.776	-0.0372	0.0032	0.0173	1	198524264	0.0373	0.3183	140254	61106	outcome	3440	0.2798	1	6.74528e-23	198524264	CD28+ CD45RA+ CD8dim T cell %CD8dim T cell	prostate cancer	7.98281e-22	0.0491617	177.757
rs2367376	C	T	C	T	0.1716	-0.0014	0.2464	0.4311	2	87009742	0.0093	0.8839	140254	61106	outcome	3440	0.02881	2	2.84603e-09	87009742	CD28+ CD45RA+ CD8dim T cell %CD8dim T cell	prostate cancer	4.90431e-09	0.0109357	38.0126
rs10748649	C	A	C	A	1.01	0.0047	0.469	0.5425	10	97601703	0.0081	0.5635	140254	61106	outcome	3408	0.01968	10	1e-200	97601703	CD39+ CD8+ T cell Absolute Count	prostate cancer	0	0.508089	3518.02
rs11818051	T	C	T	C	0.7156	0.029	0.0317	0.0119	10	97972294	0.0429	0.4987	140254	61106	outcome	3408	0.07506	10	2.78676e-21	97972294	CD39+ CD8+ T cell Absolute Count	prostate cancer	1.80657e-20	0.0314369	110.549
rs12778618	C	T	C	T	0.8528	0.1223	0.0461	0.0151	10	95633120	0.0395	0.001942	140254	61106	outcome	3408	0.06178	10	3.22701e-42	95633120	CD39+ CD8+ T cell Absolute Count	prostate cancer	7.58433e-39	0.0639629	232.745
rs12778797	C	T	C	T	0.2118	-0.0119	0.3841	0.3926	10	96998688	0.0083	0.1507	140254	61106	outcome	3408	0.0271	10	7.19283e-15	96998688	CD39+ CD8+ T cell Absolute Count	prostate cancer	7.57146e-14	0.0212244	73.8581
rs17111341	C	T	C	T	0.6424	0.0695	0.0668	0.0188	10	97881031	0.0316	0.0276802	140254	61106	outcome	3408	0.05263	10	1.4471e-33	97881031	CD39+ CD8+ T cell Absolute Count	prostate cancer	2.7732e-31	0.0514508	184.747
rs72812685	A	G	A	G	0.6785	-0.0101	0.0481	0.0631	10	95845989	0.018	0.5739	140254	61106	outcome	3408	0.05954	10	1.48594e-29	95845989	CD39+ CD8+ T cell Absolute Count	prostate cancer	1.23414e-28	0.0421567	149.905
rs36058358	A	G	A	G	-0.22	0.0149	0.2229	0.0402	6	32636282	0.0204	0.4648	140254	61106	outcome	3408	0.03784	6	6.67898e-09	32636282	CD28- CD8+ T cell Absolute Count	prostate cancer	1.88881e-08	0.0167673	58.0832
rs4796089	C	T	C	T	-0.2103	-0.0038	0.1339	0.089	17	33814758	0.0148	0.7971	140254	61106	outcome	3408	0.03733	17	1.89998e-08	33814758	CD28- CD8+ T cell Absolute Count	prostate cancer	3.44012e-08	0.0102579	35.3004
rs11579717	A	G	A	G	-1.249	0.011	0.0044	0.0434	1	199999121	0.0222	0.62	140254	61106	outcome	3440	0.188	1	3.54568e-11	199999121	CD28+ CD45RA- CD8+ T cell %CD8+ T cell	prostate cancer	9.66315e-11	0.0136676	47.6404
rs146620586	T	G	T	G	-2.596	-0.0372	0.0032	0.0173	1	198524264	0.0373	0.3183	140254	61106	outcome	3440	0.2832	1	8.25848e-20	198524264	CD28+ CD45RA- CD8+ T cell %CD8+ T cell	prostate cancer	7.69708e-19	0.042993	154.45
rs4368632	C	G	C	G	0.1446	-0.0007	0.623	0.5828	4	78946913	0.0085	0.9376	140254	61106	outcome	3440	0.0259	4	2.57798e-08	78946913	CD28+ CD45RA- CD8+ T cell %CD8+ T cell	prostate cancer	3.92939e-08	0.00982191	34.1027
rs9271513	G	C	G	C	-0.2338	-0.0177	0.7833	0.8065	6	32589523	0.01	0.0780692	140254	61106	outcome	3440	0.03453	6	1.48184e-11	32589523	CD28+ CD45RA- CD8+ T cell %CD8+ T cell	prostate cancer	1.55421e-10	0.0185569	65.005
rs114135956	C	T	C	T	53.93	0.0058	0.0003	0.0253	2	8930530	0.0336	0.8636	140254	61106	outcome	3425	8.721	2	6.98393e-10	8930530	CD45RA- CD28- CD8+ T cell %CD8+ T cell	prostate cancer	1.27128e-09	1.74454	-8020.45
rs140385926	G	A	G	A	28.75	-0.0351	0.0009	0.0153	15	69903187	0.036	0.3297	140254	61106	outcome	3425	5.206	15	3.586e-08	69903187	CD45RA- CD28- CD8+ T cell %CD8+ T cell	prostate cancer	1.17738e-07	1.48647	-10459.4
rs17212021	C	T	C	T	-2.715	0.0175	0.2372	0.0411	6	32637474	0.0204	0.3895	140254	61106	outcome	3425	0.473	6	1.033e-08	32637474	CD45RA- CD28- CD8+ T cell %CD8+ T cell	prostate cancer	3.22223e-08	2.66744	-5475.84
rs1736913	C	T	C	T	2.095	0.0038	0.6474	0.6604	6	29704400	0.0084	0.6455	140254	61106	outcome	3425	0.3672	6	1.26101e-08	29704400	CD45RA- CD28- CD8+ T cell %CD8+ T cell	prostate cancer	2.73746e-08	2.00379	-6833.06
rs190312656	A	G	A	G	26.32	0.0016	0.001	0.0106	16	81625215	0.0441	0.9709	140254	61106	outcome	3425	4.629	16	1.41501e-08	81625215	CD45RA- CD28- CD8+ T cell %CD8+ T cell	prostate cancer	2.11224e-08	1.3841	-12334.8
rs450175	C	A	C	A	-1.704	-0.0018	0.541	0.4808	2	38400812	0.0082	0.8222	140254	61106	outcome	3425	0.3071	2	3.08099e-08	38400812	CD45RA- CD28- CD8+ T cell %CD8+ T cell	prostate cancer	5.34778e-08	1.44205	-11166.5
rs72815709	C	T	C	T	18.44	0.0271	0.0022	0.0355	2	80415786	0.025	0.2777	140254	61106	outcome	3425	3.073	2	2.15899e-09	80415786	CD45RA- CD28- CD8+ T cell %CD8+ T cell	prostate cancer	8.91091e-09	1.49286	-10368.2
rs742867	T	C	T	C	14.88	-0.0042	0.0029	0.0107	14	68217724	0.0444	0.9238	140254	61106	outcome	3425	2.692	14	3.49301e-08	68217724	CD45RA- CD28- CD8+ T cell %CD8+ T cell	prostate cancer	5.39491e-08	1.28048	-15627.1
rs11090614	G	A	G	A	-0.3049	0.0143	0.2474	0.2522	22	44300847	0.0107	0.1831	140254	61106	outcome	1837	0.03896	22	8.44501e-15	44300847	BAFF-R on IgD+ CD38- unswitched memory B cell	prostate cancer	3.48914e-14	0.0346185	65.803
rs113530150	T	C	T	C	-0.3995	-0.0514	0.0806	0.0427	22	40567196	0.0206	0.01278	140254	61106	outcome	1837	0.06471	22	8.163e-10	40567196	BAFF-R on IgD+ CD38- unswitched memory B cell	prostate cancer	5.62489e-09	0.0236539	44.4565
rs139290596	G	A	G	A	-0.4589	-0.0852	0.0482	0.0132	22	44349795	0.0442	0.0540705	140254	61106	outcome	1837	0.07926	22	8.25201e-09	44349795	BAFF-R on IgD+ CD38- unswitched memory B cell	prostate cancer	3.5e-08	0.0193223	36.155
rs146069723	T	C	T	C	-0.5625	0.1283	0.0762	0.0153	22	43339331	0.0323	7.26106e-05	140254	61106	outcome	1837	0.06459	22	6.77954e-18	43339331	BAFF-R on IgD+ CD38- unswitched memory B cell	prostate cancer	3.94448e-16	0.0445459	85.5528
rs150612106	A	G	A	G	-0.6961	-0.0158	0.025	0.0177	22	40175781	0.0325	0.6273	140254	61106	outcome	1837	0.1109	22	4.22902e-10	40175781	BAFF-R on IgD+ CD38- unswitched memory B cell	prostate cancer	7.40632e-10	0.0236221	44.3952
rs187315152	T	A	T	A	-0.5226	-0.0357	0.0501	0.0157	22	41305795	0.0389	0.359	140254	61106	outcome	1837	0.083	22	3.819e-10	41305795	BAFF-R on IgD+ CD38- unswitched memory B cell	prostate cancer	8.93581e-10	0.0259947	48.9733
rs5758649	T	C	T	C	-0.6208	0.0151	0.0887	0.0275	22	42605548	0.0261	0.5629	140254	61106	outcome	1837	0.05961	22	1.02306e-24	42605548	BAFF-R on IgD+ CD38- unswitched memory B cell	prostate cancer	2.45827e-24	0.0623044	121.925
rs73165129	T	C	T	C	-1.495	0.0018	0.0944	0.0803	22	42315371	0.0148	0.904	140254	61106	outcome	1837	0.04742	22	9.84011e-175	42315371	BAFF-R on IgD+ CD38- unswitched memory B cell	prostate cancer	6.75637e-185	0.382138	1134.92
rs10426452	A	G	A	G	-0.1391	-0.0094	0.3815	0.2903	19	49907690	0.0089	0.2944	140254	61106	outcome	3595	0.02491	19	2.50599e-08	49907690	CD19 on CD20- CD38- B cell	prostate cancer	9.38078e-08	0.009131	33.11
rs112417310	A	G	A	G	0.5474	-0.0128	0.0201	0.0109	1	206855483	0.0423	0.7623	140254	61106	outcome	3656	0.08918	1	9.27598e-10	206855483	CD19 on CD24+ CD27+ B cell	prostate cancer	1.96914e-09	0.0118037	43.6458
rs138920008	C	G	C	G	-1.443	-0.0132	0.0041	0.0432	16	32422808	0.0265	0.6181	140254	61106	outcome	3656	0.2168	16	3.15428e-11	32422808	CD19 on CD24+ CD27+ B cell	prostate cancer	9.33069e-11	0.0170044	63.209
rs12554596	G	A	G	A	-0.1558	-0.0131	0.3892	0.194	9	37002142	0.0112	0.2433	140254	61106	outcome	3645	0.02531	9	8.42597e-10	37002142	CD20 on IgD+ CD38- B cell	prostate cancer	4.10591e-09	0.0115408	42.5341
rs2066399	A	G	A	G	0.187	-0.0099	0.8211	0.8268	6	15880540	0.0108	0.3559	140254	61106	outcome	3645	0.03209	6	6.07995e-09	15880540	CD20 on IgD+ CD38- B cell	prostate cancer	2.17317e-08	0.0102735	37.815
rs2070770	T	C	T	C	-0.2571	-0.0166	0.0967	0.0733	11	60230531	0.016	0.299	140254	61106	outcome	3645	0.04166	11	7.48997e-10	60230531	CD20 on IgD+ CD38- B cell	prostate cancer	3.2921e-09	0.0115476	42.5595
rs1007337	T	C	T	C	-0.1389	-0.0044	0.6024	0.6723	22	39781585	0.0085	0.6017	140254	61106	outcome	3657	0.02509	22	3.33503e-08	39781585	CD20 on IgD+ CD38dim B cell	prostate cancer	7.67992e-08	0.009242	34.0946
rs2066399	A	G	A	G	0.2375	-0.0099	0.821	0.8268	6	15880540	0.0108	0.3559	140254	61106	outcome	3657	0.03213	6	1.75186e-13	15880540	CD20 on IgD+ CD38dim B cell	prostate cancer	9.87258e-13	0.0165788	61.6171
rs34486765	A	G	A	G	0.167	-0.0076	0.3094	0.196	19	49915911	0.0106	0.4737	140254	61106	outcome	3657	0.02642	19	2.89501e-10	49915911	CD20 on IgD+ CD38dim B cell	prostate cancer	9.72935e-10	0.0119182	44.0864
rs72836542	T	C	T	C	0.1752	0.0062	0.3161	0.2799	6	14091682	0.0089	0.4856	140254	61106	outcome	3657	0.0268	6	7.1978e-11	14091682	CD20 on IgD+ CD38dim B cell	prostate cancer	2.46141e-10	0.0132714	49.1592
rs7404890	A	G	A	G	0.1788	0.0083	0.8208	0.7603	16	11007193	0.0107	0.4408	140254	61106	outcome	3657	0.03256	16	4.22902e-08	11007193	CD20 on IgD+ CD38dim B cell	prostate cancer	1.22678e-07	0.0094046	34.7002
rs12342539	T	C	T	C	-0.1657	0.0003	0.2216	0.2031	9	4327960	0.0107	0.9748	140254	61106	outcome	3657	0.02956	9	2.246e-08	4327960	CD25 on IgD- CD38- B cell	prostate cancer	3.37458e-08	0.00947213	34.9517
rs12722531	A	G	A	G	0.4479	-0.0163	0.074	0.0221	10	6076076	0.0277	0.5563	140254	61106	outcome	3657	0.04714	10	3.60662e-21	6076076	CD25 on IgD- CD38- B cell	prostate cancer	2.31222e-20	0.0274938	103.331
rs706779	C	T	C	T	-0.293	-0.0203	0.6084	0.4569	10	6098824	0.008	0.0110301	140254	61106	outcome	3657	0.02511	10	6.63743e-31	6098824	CD25 on IgD- CD38- B cell	prostate cancer	2.36181e-28	0.040907	155.892
rs4657041	C	T	C	T	-0.1484	-0.0078	0.3347	0.5086	1	161478859	0.0082	0.3437	140254	61106	outcome	3651	0.02581	1	9.69304e-09	161478859	CD27 on Plasma Blast-Plasma Cell	prostate cancer	3.47602e-08	0.00980779	36.1431
rs115062208	G	A	G	A	-0.7874	0.0139	0.0115	0.0202	4	15956227	0.0312	0.6557	140254	61106	outcome	3656	0.1197	4	5.47898e-11	15956227	CD38 on naive-mature B cell	prostate cancer	1.46032e-10	0.014096	52.2431
rs76112278	A	G	A	G	-0.8747	0.0179	0.0194	0.0119	4	15915069	0.0432	0.6784	140254	61106	outcome	3656	0.08908	4	1.75792e-22	15915069	CD38 on naive-mature B cell	prostate cancer	9.30323e-22	0.02911	109.557
rs76354299	A	G	A	G	-0.4181	0.0242	0.0321	0.0353	4	15037408	0.0234	0.301	140254	61106	outcome	3656	0.06918	4	1.65901e-09	15037408	CD38 on naive-mature B cell	prostate cancer	6.99818e-09	0.0108624	40.1271
rs2995091	C	T	C	T	0.4822	0.0099	0.4457	0.364	1	167434277	0.0084	0.2396	140254	61106	outcome	2912	0.02632	1	4.57088e-71	167434277	CD3 on Effector Memory CD4+ T cell	prostate cancer	1.42777e-69	0.114887	377.717
rs6684311	G	C	G	C	-0.2348	0.0107	0.1441	0.2349	1	166485891	0.0097	0.2709	140254	61106	outcome	2912	0.03907	1	2.09199e-09	166485891	CD3 on Effector Memory CD4+ T cell	prostate cancer	7.56589e-09	0.0135992	40.1192
rs114672530	A	G	A	G	-0.6177	0.01	0.0173	0.0266	1	168306279	0.029	0.730099	140254	61106	outcome	2919	0.1046	1	3.99402e-09	168306279	CD3 on activated CD4 regulatory T cell	prostate cancer	7.33327e-09	0.0129734	38.3407
rs12138291	A	G	A	G	-0.2802	0.0095	0.1482	0.235	1	166464476	0.0098	0.3318	140254	61106	outcome	2919	0.0384	1	3.82472e-13	166464476	CD3 on activated CD4 regulatory T cell	prostate cancer	1.65536e-12	0.0198222	58.9907
rs2949661	T	C	T	C	0.6184	0.0114	0.4466	0.3684	1	167424924	0.0085	0.1775	140254	61106	outcome	2919	0.02511	1	7.26106e-122	167424924	CD3 on activated CD4 regulatory T cell	prostate cancer	3.7277e-121	0.189028	679.92
rs35055340	T	C	T	C	-0.4927	0.0177	0.0324	0.0665	1	165314063	0.0173	0.3063	140254	61106	outcome	2919	0.07664	1	1.49799e-10	165314063	CD3 on activated CD4 regulatory T cell	prostate cancer	5.61349e-10	0.0152207	45.0852
rs2949661	T	C	T	C	0.5477	0.0114	0.4466	0.3684	1	167424924	0.0085	0.1775	140254	61106	outcome	2919	0.02564	1	3.54405e-94	167424924	CD3 on CD39+ secreting CD4 regulatory T cell	prostate cancer	8.7092e-93	0.148277	507.822
rs61814886	A	G	A	G	0.2885	-0.0067	0.1059	0.1187	1	167136405	0.0126	0.5961	140254	61106	outcome	2919	0.04408	1	6.96787e-11	167136405	CD3 on CD39+ secreting CD4 regulatory T cell	prostate cancer	1.71201e-10	0.0157617	46.7132
rs76540213	T	C	T	C	0.5264	0.0273	0.0214	0.0136	1	166035343	0.0371	0.4612	140254	61106	outcome	2919	0.09617	1	4.78795e-08	166035343	CD3 on CD39+ secreting CD4 regulatory T cell	prostate cancer	1.14268e-07	0.011606	34.2521
rs34460712	A	G	A	G	0.1995	-0.0222	0.1712	0.0803	2	38935236	0.016	0.1646	140254	61106	outcome	2920	0.03596	2	3.17001e-08	38935236	CD28 on secreting CD4 regulatory T cell	prostate cancer	1.27485e-07	0.0112946	33.334
rs3757247	T	C	T	C	0.1526	0.0142	0.5264	0.4538	6	90957463	0.0081	0.0801106	140254	61106	outcome	2920	0.02725	6	2.33798e-08	90957463	CD28 on secreting CD4 regulatory T cell	prostate cancer	1.28064e-07	0.0116109	34.2787
rs62183989	T	C	T	C	-0.4161	0.0094	0.1983	0.1701	2	204609402	0.0109	0.391	140254	61106	outcome	2920	0.03368	2	3.30674e-34	204609402	CD28 on secreting CD4 regulatory T cell	prostate cancer	3.61084e-33	0.0550503	169.995
rs138284624	T	C	T	C	-0.7524	0.0173	0.0277	0.0165	17	56385573	0.033	0.599799	140254	61106	outcome	2920	0.08106	17	3.16665e-20	56385573	CD127 on granulocyte	prostate cancer	1.2352e-19	0.0304935	91.7788
rs139132726	T	C	T	C	-0.659	-0.1212	0.014	0.0083	17	55643849	0.0572	0.0342302	140254	61106	outcome	2920	0.1144	17	9.40394e-09	55643849	CD127 on granulocyte	prostate cancer	7.15117e-08	0.0119896	35.4103
rs142587417	A	G	A	G	-0.8103	-0.0891	0.0144	0.0124	17	58777014	0.0561	0.1119	140254	61106	outcome	2920	0.1169	17	5.07809e-12	58777014	CD127 on granulocyte	prostate cancer	3.74013e-11	0.0186374	55.4167
rs146130460	A	G	A	G	-0.9089	0.0034	0.0079	0.0106	17	61576413	0.0484	0.9435	140254	61106	outcome	2920	0.1549	17	4.89305e-09	61576413	CD127 on granulocyte	prostate cancer	7.24294e-09	0.0129493	38.2816
rs147173440	T	G	T	G	-1.096	-0.0164	0.0074	0.011	17	59945942	0.0501	0.743401	140254	61106	outcome	2920	0.1607	17	1.12305e-11	59945942	CD127 on granulocyte	prostate cancer	2.31494e-11	0.0176464	52.4173
rs4433170	G	C	G	C	0.1825	0.0112	0.2303	0.3032	8	6891971	0.0089	0.2087	140254	61106	outcome	2920	0.03337	8	4.90298e-08	6891971	CD127 on granulocyte	prostate cancer	1.75833e-07	0.0118079	34.867
rs77771777	T	C	T	C	-0.6814	-0.0028	0.0188	0.0287	17	55927801	0.0274	0.9188	140254	61106	outcome	2920	0.1013	17	2.05779e-11	55927801	CD127 on granulocyte	prostate cancer	3.47565e-11	0.0171297	50.8556
rs7078614	T	G	T	G	0.1714	-0.0027	0.3413	0.3974	10	6075831	0.0081	0.74	140254	61106	outcome	3435	0.0264	10	9.58959e-11	6075831	CD25 on CD39+ activated CD4 regulatory T cell	prostate cancer	2.16841e-10	0.0132092	45.9541
rs28424875	C	A	C	A	-0.3193	0.0048	0.0627	0.0565	4	42664508	0.0186	0.7967	140254	61106	outcome	2872	0.05783	4	3.66902e-08	42664508	FSC-A on myeloid Dendritic Cell	prostate cancer	6.00622e-08	0.0119832	34.809
rs55971447	T	C	T	C	-0.2761	-0.0202	0.2371	0.1176	1	161515326	0.0134	0.1325	140254	61106	outcome	2872	0.03208	1	1.22405e-17	161515326	FSC-A on myeloid Dendritic Cell	prostate cancer	1.35351e-16	0.0275779	81.3934
rs72926952	T	G	T	G	0.3426	-0.0087	0.4991	0.2989	2	203485086	0.0089	0.332	140254	61106	outcome	2872	0.0281	2	2.20699e-33	203485086	FSC-A on myeloid Dendritic Cell	prostate cancer	2.82973e-32	0.0586872	178.933
rs1800973	A	C	A	C	-0.2824	-0.0181	0.0844	0.0717	12	69744014	0.0175	0.2999	140254	61106	outcome	2850	0.04984	12	1.60702e-08	69744014	FSC-A on monocyte	prostate cancer	4.97707e-08	0.0123256	35.5413
rs77762937	T	G	T	G	0.1733	-0.0065	0.5089	0.284	2	203467470	0.0091	0.4759	140254	61106	outcome	2850	0.02875	2	1.88999e-09	203467470	FSC-A on monocyte	prostate cancer	4.82352e-09	0.0150117	43.4049
rs4683184	A	G	A	G	0.2224	-0.0038	0.6904	0.6361	3	46187707	0.0084	0.6481	140254	61106	outcome	3629	0.0265	3	6.59174e-17	46187707	CCR2 on monocyte	prostate cancer	2.6897e-16	0.0211447	78.3484
rs6808587	C	G	C	G	-0.4085	0.0056	0.0336	0.0439	3	46875690	0.0199	0.7771	140254	61106	outcome	3629	0.06877	3	3.12399e-09	46875690	CCR2 on monocyte	prostate cancer	6.25428e-09	0.010837	39.7365
rs11615628	A	G	A	G	-0.3032	0.0124	0.2464	0.2929	12	6903631	0.0096	0.1981	140254	61106	outcome	2912	0.03145	12	1.11892e-21	6903631	CD4 on Central Memory CD4+ T cell	prostate cancer	1.32221e-20	0.0341405	102.861
rs3129267	G	C	G	C	-0.1988	-0.0135	0.7735	0.6744	6	33098896	0.0085	0.1121	140254	61106	outcome	2912	0.03437	6	8.10401e-09	33098896	CD4 on Central Memory CD4+ T cell	prostate cancer	4.09391e-08	0.0138481	40.864
rs11615628	A	G	A	G	-0.3264	0.0124	0.2465	0.2929	12	6903631	0.0096	0.1981	140254	61106	outcome	2911	0.03137	12	6.461e-25	6903631	CD4 on CD45RA+ CD4+ T cell	prostate cancer	9.19214e-24	0.0395759	119.87
rs3129267	G	C	G	C	-0.2179	-0.0135	0.7734	0.6744	6	33098896	0.0085	0.1121	140254	61106	outcome	2911	0.03427	6	2.339e-10	33098896	CD4 on CD45RA+ CD4+ T cell	prostate cancer	1.43508e-09	0.0166421	49.2312
rs2523887	G	A	G	A	0.1639	-0.02	0.5359	0.2701	6	31040725	0.009	0.0265003	140254	61106	outcome	2911	0.02894	6	1.629e-08	31040725	CD8 on Terminally Differentiated CD8+ T cell	prostate cancer	1.30818e-07	0.0133624	39.3976
rs11615628	A	G	A	G	-0.2417	0.0124	0.2466	0.2929	12	6903631	0.0096	0.1981	140254	61106	outcome	2920	0.03133	12	1.65615e-14	6903631	CD4 on CD4 regulatory T cell	prostate cancer	1.13414e-13	0.0217071	64.7468
rs11615628	A	G	A	G	-0.1847	0.0124	0.2467	0.2929	12	6903631	0.0096	0.1981	140254	61106	outcome	2919	0.03074	12	2.10698e-09	6903631	CD4 on resting CD4 regulatory T cell	prostate cancer	8.95623e-09	0.0126795	37.461
rs11615628	A	G	A	G	-0.2367	0.0124	0.2466	0.2929	12	6903631	0.0096	0.1981	140254	61106	outcome	2920	0.03149	12	7.47653e-14	6903631	CD4 on activated & secreting CD4 regulatory T cell	prostate cancer	4.82074e-13	0.0208183	62.0393
rs12598451	A	G	A	G	-0.378	-0.0041	0.2279	0.2551	16	10982607	0.01	0.680201	140254	61106	outcome	2971	0.03133	16	9.37994e-33	10982607	HLA DR on HLA DR+ Natural Killer	prostate cancer	4.77878e-32	0.0502842	157.198
[truncated: 602 more rows]
