# Supplementary material for: Causal role of immune cells in prostate cancer: a bidirectional Mendelian-randomization analyses
Source: Aging (Albany NY). 2024 Jun 17;16(12):10477–88. doi: 10.18632/aging.205942 (PMC11236311; doi:10.18632/aging.205942)
Supplement: Supplementary Table 3 [file aging-16-205942-s004.xlsx]

## Sheet: Sheet1
Supplementary Table 3. Results of the causal effect of immune cells on PCa.
id.exposure	id.outcome	Trait	nsnp	b	se	pval	lo_ci	up_ci	or	or_lci95	or_uci95
ebi-a-GCST90002121	ieu-b-85.vcf	CD8 on CD39+ CD8+ T cell	5	-0.0283433	0.024554	0.248366	-0.0764691	0.0197824	0.972055	0.926382	1.01998
ebi-a-GCST90002121	ieu-b-85.vcf	CD8 on CD39+ CD8+ T cell	5	-0.00913451	0.104689	0.935968	-0.214325	0.196056	0.990907	0.807086	1.21659
ebi-a-GCST90002121	ieu-b-85.vcf	CD8 on CD39+ CD8+ T cell	5	-0.0113638	0.028873	0.693893	-0.0679549	0.0452274	0.988701	0.934303	1.04627
ebi-a-GCST90002121	ieu-b-85.vcf	CD8 on CD39+ CD8+ T cell	5	-0.0400672	0.0399517	0.372662	-0.118373	0.0382382	0.960725	0.888365	1.03898
ebi-a-GCST90002120	ieu-b-85.vcf	CD8 on CD28- CD8+ T cell	2	-0.00962904	0.0376591	0.798191	-0.0834409	0.0641828	0.990417	0.919945	1.06629
ebi-a-GCST90002119	ieu-b-85.vcf	CD8 on CD28+ CD45RA+ CD8+ T cell	6	-0.00468151	0.0324915	0.885434	-0.0683649	0.0590018	0.995329	0.93392	1.06078
ebi-a-GCST90002119	ieu-b-85.vcf	CD8 on CD28+ CD45RA+ CD8+ T cell	6	0.0402281	0.0885626	0.673217	-0.133355	0.213811	1.04105	0.875155	1.23839
ebi-a-GCST90002119	ieu-b-85.vcf	CD8 on CD28+ CD45RA+ CD8+ T cell	6	0.00917232	0.0163943	0.575834	-0.0229606	0.0413052	1.00921	0.977301	1.04217
ebi-a-GCST90002119	ieu-b-85.vcf	CD8 on CD28+ CD45RA+ CD8+ T cell	6	0.0145251	0.0152156	0.38361	-0.0152975	0.0443477	1.01463	0.984819	1.04535
ebi-a-GCST90002118	ieu-b-85.vcf	CD8 on CD28+ CD45RA- CD8+ T cell	2	-0.0043967	0.0241531	0.855555	-0.0517367	0.0429433	0.995613	0.949579	1.04388
ebi-a-GCST90002117	ieu-b-85.vcf	HLA DR on HLA DR+ Natural Killer	6	-0.0220327	0.0309145	0.476033	-0.0826252	0.0385598	0.978208	0.920696	1.03931
ebi-a-GCST90002117	ieu-b-85.vcf	HLA DR on HLA DR+ Natural Killer	6	0.0489251	0.0879451	0.607648	-0.123447	0.221297	1.05014	0.883868	1.24769
ebi-a-GCST90002117	ieu-b-85.vcf	HLA DR on HLA DR+ Natural Killer	6	0.00855172	0.0223036	0.701406	-0.0351634	0.0522669	1.00859	0.965448	1.05366
ebi-a-GCST90002117	ieu-b-85.vcf	HLA DR on HLA DR+ Natural Killer	6	0.0206108	0.0234007	0.418756	-0.0252546	0.0664762	1.02082	0.975062	1.06874
ebi-a-GCST90002116	ieu-b-85.vcf	HLA DR on B cell	8	0.0199467	0.0139862	0.153818	-0.00746617	0.0473596	1.02015	0.992562	1.0485
ebi-a-GCST90002116	ieu-b-85.vcf	HLA DR on B cell	8	0.0240473	0.0394068	0.564091	-0.0531901	0.101285	1.02434	0.9482	1.10659
ebi-a-GCST90002116	ieu-b-85.vcf	HLA DR on B cell	8	0.0358195	0.0143896	0.0128006	0.00761597	0.0640231	1.03647	1.00765	1.06612
ebi-a-GCST90002116	ieu-b-85.vcf	HLA DR on B cell	8	0.020602	0.0139732	0.183872	-0.00678541	0.0479894	1.02082	0.993238	1.04916
ebi-a-GCST90002111	ieu-b-85.vcf	HLA DR on CD33dim HLA DR+ CD11b-	4	-0.0445545	0.0186623	0.016968	-0.0811327	-0.00797631	0.956423	0.922071	0.992055
ebi-a-GCST90002111	ieu-b-85.vcf	HLA DR on CD33dim HLA DR+ CD11b-	4	0.116896	0.268532	0.705807	-0.409426	0.643218	1.124	0.664031	1.90259
ebi-a-GCST90002111	ieu-b-85.vcf	HLA DR on CD33dim HLA DR+ CD11b-	4	-0.0475147	0.0165353	0.00405914	-0.0799238	-0.0151055	0.953596	0.923187	0.985008
ebi-a-GCST90002111	ieu-b-85.vcf	HLA DR on CD33dim HLA DR+ CD11b-	4	-0.0519273	0.0192513	0.0739527	-0.0896599	-0.0141947	0.949398	0.914242	0.985906
ebi-a-GCST90002110	ieu-b-85.vcf	HLA DR on CD33dim HLA DR+ CD11b+	4	-0.0458187	0.0175611	0.00907791	-0.0802384	-0.011399	0.955215	0.922896	0.988666
ebi-a-GCST90002110	ieu-b-85.vcf	HLA DR on CD33dim HLA DR+ CD11b+	4	-0.0455909	0.15326	0.794158	-0.34598	0.254798	0.955433	0.707526	1.2902
ebi-a-GCST90002110	ieu-b-85.vcf	HLA DR on CD33dim HLA DR+ CD11b+	4	-0.0471667	0.0160252	0.0032475	-0.078576	-0.0157573	0.953928	0.924432	0.984366
ebi-a-GCST90002110	ieu-b-85.vcf	HLA DR on CD33dim HLA DR+ CD11b+	4	-0.0489911	0.0182311	0.0745889	-0.084724	-0.0132583	0.95219	0.918766	0.986829
ebi-a-GCST90002109	ieu-b-85.vcf	HLA DR on CD33+ HLA DR+ CD14dim	3	0.0679466	0.0164906	3.78342e-05	0.035625	0.100268	1.07031	1.03627	1.10547
ebi-a-GCST90002109	ieu-b-85.vcf	HLA DR on CD33+ HLA DR+ CD14dim	3	0.0606764	0.0864733	0.610483	-0.108811	0.230164	1.06256	0.8969	1.25881
ebi-a-GCST90002109	ieu-b-85.vcf	HLA DR on CD33+ HLA DR+ CD14dim	3	0.0677062	0.018376	0.00022916	0.0316892	0.103723	1.07005	1.0322	1.10929
ebi-a-GCST90002109	ieu-b-85.vcf	HLA DR on CD33+ HLA DR+ CD14dim	3	0.0674279	0.0190528	0.00713981	0.0300843	0.104771	1.06975	1.03054	1.11046
ebi-a-GCST90002108	ieu-b-85.vcf	HLA DR on CD33+ HLA DR+ CD14-	3	0.0489162	0.0120213	4.71933e-05	0.0253543	0.072478	1.05013	1.02568	1.07517
ebi-a-GCST90002108	ieu-b-85.vcf	HLA DR on CD33+ HLA DR+ CD14-	3	0.0412265	0.0522794	0.574904	-0.0612411	0.143694	1.04209	0.940596	1.15453
ebi-a-GCST90002108	ieu-b-85.vcf	HLA DR on CD33+ HLA DR+ CD14-	3	0.0489032	0.0121623	5.79824e-05	0.025065	0.0727414	1.05012	1.02538	1.07545
ebi-a-GCST90002108	ieu-b-85.vcf	HLA DR on CD33+ HLA DR+ CD14-	3	0.0479892	0.013593	0.0071708	0.021347	0.0746314	1.04916	1.02158	1.07749
ebi-a-GCST90002106	ieu-b-85.vcf	HLA DR on Dendritic Cell	6	0.0270154	0.0146656	0.0654623	-0.00172926	0.0557601	1.02738	0.998272	1.05734
ebi-a-GCST90002106	ieu-b-85.vcf	HLA DR on Dendritic Cell	6	0.0386646	0.0928669	0.698528	-0.143355	0.220684	1.03942	0.866447	1.24693
ebi-a-GCST90002106	ieu-b-85.vcf	HLA DR on Dendritic Cell	6	0.0204369	0.018589	0.271591	-0.0159976	0.0568714	1.02065	0.98413	1.05852
ebi-a-GCST90002106	ieu-b-85.vcf	HLA DR on Dendritic Cell	6	0.0161949	0.0216756	0.488597	-0.0262892	0.058679	1.01633	0.974053	1.06043
ebi-a-GCST90002105	ieu-b-85.vcf	HLA DR on plasmacytoid Dendritic Cell	8	0.0259414	0.0127346	0.0416425	0.000981525	0.0509012	1.02628	1.00098	1.05222
ebi-a-GCST90002105	ieu-b-85.vcf	HLA DR on plasmacytoid Dendritic Cell	8	0.0426693	0.0420024	0.348889	-0.0396555	0.124994	1.04359	0.96112	1.13314
ebi-a-GCST90002105	ieu-b-85.vcf	HLA DR on plasmacytoid Dendritic Cell	8	0.0158839	0.015709	0.311952	-0.0149057	0.0466735	1.01601	0.985205	1.04778
ebi-a-GCST90002105	ieu-b-85.vcf	HLA DR on plasmacytoid Dendritic Cell	8	0.0136968	0.0208837	0.532869	-0.0272352	0.0546289	1.01379	0.973132	1.05615
ebi-a-GCST90002104	ieu-b-85.vcf	HLA DR on myeloid Dendritic Cell	6	0.0223222	0.0139959	0.110731	-0.00510966	0.0497541	1.02257	0.994903	1.05101
ebi-a-GCST90002104	ieu-b-85.vcf	HLA DR on myeloid Dendritic Cell	6	0.0768003	0.0650282	0.303017	-0.050655	0.204255	1.07983	0.950607	1.22661
ebi-a-GCST90002104	ieu-b-85.vcf	HLA DR on myeloid Dendritic Cell	6	0.0157113	0.016262	0.333977	-0.0161623	0.0475849	1.01584	0.983968	1.04874
ebi-a-GCST90002104	ieu-b-85.vcf	HLA DR on myeloid Dendritic Cell	6	0.0137811	0.0199435	0.520325	-0.0253082	0.0528703	1.01388	0.975009	1.05429
ebi-a-GCST90002102	ieu-b-85.vcf	CD45RA on resting CD4 regulatory T cell	6	0.000861028	0.0114002	0.939795	-0.0214834	0.0232055	1.00086	0.978746	1.02348
ebi-a-GCST90002102	ieu-b-85.vcf	CD45RA on resting CD4 regulatory T cell	6	-0.00662245	0.0167959	0.713486	-0.0395425	0.0262976	0.993399	0.961229	1.02665
ebi-a-GCST90002102	ieu-b-85.vcf	CD45RA on resting CD4 regulatory T cell	6	0.00252365	0.0106533	0.812744	-0.0183569	0.0234042	1.00253	0.981811	1.02368
ebi-a-GCST90002102	ieu-b-85.vcf	CD45RA on resting CD4 regulatory T cell	6	-0.00374462	0.0116713	0.761307	-0.0266203	0.019131	0.996262	0.973731	1.01932
ebi-a-GCST90002100	ieu-b-85.vcf	CD45RA on naive CD8+ T cell	2	-0.049096	0.0432077	0.255839	-0.133783	0.035591	0.95209	0.87478	1.03623
ebi-a-GCST90002099	ieu-b-85.vcf	CD4RA on Terminally Differentiated CD4+ T cell	3	-0.0134023	0.0164512	0.415261	-0.0456467	0.0188421	0.986687	0.955379	1.01902
ebi-a-GCST90002099	ieu-b-85.vcf	CD4RA on Terminally Differentiated CD4+ T cell	3	0.0005619	0.0239188	0.985047	-0.0463189	0.0474427	1.00056	0.954737	1.04859
ebi-a-GCST90002099	ieu-b-85.vcf	CD4RA on Terminally Differentiated CD4+ T cell	3	-0.0109663	0.0151281	0.468517	-0.0406173	0.0186848	0.989094	0.960196	1.01886
ebi-a-GCST90002099	ieu-b-85.vcf	CD4RA on Terminally Differentiated CD4+ T cell	3	-0.0094827	0.0177967	0.647424	-0.0443642	0.0253988	0.990562	0.956605	1.02572
ebi-a-GCST90002098	ieu-b-85.vcf	CD45RA on naive CD4+ T cell	10	-0.0111909	0.0104478	0.28411	-0.0316685	0.00928667	0.988871	0.968828	1.00933
ebi-a-GCST90002098	ieu-b-85.vcf	CD45RA on naive CD4+ T cell	10	0.00656158	0.012566	0.615698	-0.0180677	0.0311909	1.00658	0.982095	1.03168
ebi-a-GCST90002098	ieu-b-85.vcf	CD45RA on naive CD4+ T cell	10	-0.00612628	0.012206	0.615733	-0.0300501	0.0177975	0.993892	0.970397	1.01796
ebi-a-GCST90002098	ieu-b-85.vcf	CD45RA on naive CD4+ T cell	10	-0.0084128	0.0125333	0.518925	-0.0329781	0.0161525	0.991622	0.96756	1.01628
ebi-a-GCST90002090	ieu-b-85.vcf	CD11c on granulocyte	4	-0.0215718	0.0211682	0.308171	-0.0630615	0.0199179	0.978659	0.938886	1.02012
ebi-a-GCST90002090	ieu-b-85.vcf	CD11c on granulocyte	4	0.067854	0.0666397	0.4157	-0.0627598	0.198468	1.07021	0.939169	1.21953
ebi-a-GCST90002090	ieu-b-85.vcf	CD11c on granulocyte	4	-0.030525	0.0270318	0.258804	-0.0835074	0.0224574	0.969936	0.919884	1.02271
ebi-a-GCST90002090	ieu-b-85.vcf	CD11c on granulocyte	4	-0.0359745	0.0337843	0.365055	-0.102192	0.0302428	0.964665	0.902856	1.0307
ebi-a-GCST90002089	ieu-b-85.vcf	CD11c on monocyte	2	-0.0115517	0.0277708	0.677435	-0.0659824	0.042879	0.988515	0.936147	1.04381
ebi-a-GCST90002088	ieu-b-85.vcf	CD11c on CD62L+ myeloid Dendritic Cell	2	0.0623152	0.0220714	0.00475259	0.0190552	0.105575	1.0643	1.01924	1.11135
ebi-a-GCST90002087	ieu-b-85.vcf	CD11c on myeloid Dendritic Cell	5	-0.00153722	0.0235592	0.947976	-0.0477133	0.0446388	0.998464	0.953407	1.04565
ebi-a-GCST90002087	ieu-b-85.vcf	CD11c on myeloid Dendritic Cell	5	-0.0109101	0.0735098	0.891429	-0.154989	0.133169	0.989149	0.856424	1.14244
ebi-a-GCST90002087	ieu-b-85.vcf	CD11c on myeloid Dendritic Cell	5	-0.00906031	0.0270308	0.737486	-0.0620406	0.04392	0.990981	0.939845	1.0449
ebi-a-GCST90002087	ieu-b-85.vcf	CD11c on myeloid Dendritic Cell	5	-0.0228563	0.032531	0.521041	-0.0866171	0.0409045	0.977403	0.917028	1.04175
ebi-a-GCST90002084	ieu-b-85.vcf	SSC-A on Natural Killer T	2	0.00586184	0.0385385	0.879105	-0.0696737	0.0813974	1.00588	0.932698	1.0848
ebi-a-GCST90002081	ieu-b-85.vcf	SSC-A on CD4+ T cell	4	-0.0399788	0.07348	0.586388	-0.184	0.104042	0.96081	0.831936	1.10965
ebi-a-GCST90002081	ieu-b-85.vcf	SSC-A on CD4+ T cell	4	1.08712	1.23519	0.471624	-1.33385	3.50809	2.96572	0.263461	33.3845
ebi-a-GCST90002081	ieu-b-85.vcf	SSC-A on CD4+ T cell	4	-0.0127827	0.037893	0.735863	-0.0870531	0.0614876	0.987299	0.916628	1.06342
ebi-a-GCST90002081	ieu-b-85.vcf	SSC-A on CD4+ T cell	4	0.0278293	0.0388892	0.525904	-0.0483936	0.104052	1.02822	0.952759	1.10966
ebi-a-GCST90002078	ieu-b-85.vcf	SSC-A on granulocyte	3	0.00753204	0.0515499	0.883833	-0.0935058	0.10857	1.00756	0.910733	1.11468
ebi-a-GCST90002078	ieu-b-85.vcf	SSC-A on granulocyte	3	-0.157356	0.497284	0.8049	-1.13203	0.81732	0.8544	0.322378	2.26442
ebi-a-GCST90002078	ieu-b-85.vcf	SSC-A on granulocyte	3	0.0549781	0.0323029	0.0887642	-0.00833567	0.118292	1.05652	0.991699	1.12557
ebi-a-GCST90002078	ieu-b-85.vcf	SSC-A on granulocyte	3	0.0578901	0.0322961	0.214925	-0.00541017	0.12119	1.0596	0.994604	1.12884
ebi-a-GCST90002077	ieu-b-85.vcf	SSC-A on HLA DR+ Natural Killer	3	0.019701	0.0206663	0.340443	-0.0208049	0.0602069	1.0199	0.97941	1.06206
ebi-a-GCST90002077	ieu-b-85.vcf	SSC-A on HLA DR+ Natural Killer	3	0.0587149	0.0408338	0.386856	-0.0213194	0.138749	1.06047	0.978906	1.14884
ebi-a-GCST90002077	ieu-b-85.vcf	SSC-A on HLA DR+ Natural Killer	3	0.0181193	0.0220942	0.412162	-0.0251853	0.0614239	1.01828	0.975129	1.06335
ebi-a-GCST90002077	ieu-b-85.vcf	SSC-A on HLA DR+ Natural Killer	3	0.0332551	0.0234661	0.29216	-0.0127385	0.0792487	1.03381	0.987342	1.08247
ebi-a-GCST90002074	ieu-b-85.vcf	SSC-A on CD14+ monocyte	5	-0.00112098	0.0149667	0.940296	-0.0304557	0.0282137	0.99888	0.970003	1.02862
ebi-a-GCST90002074	ieu-b-85.vcf	SSC-A on CD14+ monocyte	5	0.0465341	0.0248988	0.158421	-0.00226747	0.0953358	1.04763	0.997735	1.10003
ebi-a-GCST90002074	ieu-b-85.vcf	SSC-A on CD14+ monocyte	5	0.0167581	0.0159418	0.293164	-0.0144878	0.048004	1.0169	0.985617	1.04917
ebi-a-GCST90002074	ieu-b-85.vcf	SSC-A on CD14+ monocyte	5	0.0150427	0.0163174	0.408764	-0.0169395	0.0470249	1.01516	0.983203	1.04815
ebi-a-GCST90002073	ieu-b-85.vcf	SSC-A on monocyte	7	-0.00463795	0.0115456	0.687901	-0.0272674	0.0179915	0.995373	0.973101	1.01815
ebi-a-GCST90002073	ieu-b-85.vcf	SSC-A on monocyte	7	0.0174337	0.017363	0.361432	-0.0165978	0.0514651	1.01759	0.983539	1.05281
ebi-a-GCST90002073	ieu-b-85.vcf	SSC-A on monocyte	7	0.00344355	0.0136803	0.80126	-0.0233697	0.0302568	1.00345	0.976901	1.03072
ebi-a-GCST90002073	ieu-b-85.vcf	SSC-A on monocyte	7	0.0110264	0.0140272	0.461734	-0.016467	0.0385198	1.01109	0.983668	1.03927
ebi-a-GCST90002072	ieu-b-85.vcf	SSC-A on plasmacytoid Dendritic Cell	4	-0.0237921	0.0322337	0.460446	-0.0869703	0.039386	0.976489	0.916704	1.04017
ebi-a-GCST90002072	ieu-b-85.vcf	SSC-A on plasmacytoid Dendritic Cell	4	0.0489173	0.123911	0.73113	-0.193949	0.291784	1.05013	0.8237	1.33881
ebi-a-GCST90002072	ieu-b-85.vcf	SSC-A on plasmacytoid Dendritic Cell	4	-0.0334716	0.0359798	0.352222	-0.103992	0.0370488	0.967082	0.901233	1.03774
ebi-a-GCST90002072	ieu-b-85.vcf	SSC-A on plasmacytoid Dendritic Cell	4	-0.0344699	0.0415876	0.467976	-0.115982	0.0470419	0.966117	0.890492	1.04817
ebi-a-GCST90002071	ieu-b-85.vcf	SSC-A on myeloid Dendritic Cell	6	0.00282052	0.0273347	0.917816	-0.0507554	0.0563965	1.00282	0.950511	1.05802
ebi-a-GCST90002071	ieu-b-85.vcf	SSC-A on myeloid Dendritic Cell	6	0.18497	0.101518	0.142539	-0.0140053	0.383945	1.20318	0.986092	1.46807
ebi-a-GCST90002071	ieu-b-85.vcf	SSC-A on myeloid Dendritic Cell	6	0.00395839	0.0364037	0.913412	-0.0673928	0.0753096	1.00397	0.934828	1.07822
ebi-a-GCST90002071	ieu-b-85.vcf	SSC-A on myeloid Dendritic Cell	6	0.0164771	0.0421546	0.711992	-0.0661461	0.0991002	1.01661	0.935994	1.10418
ebi-a-GCST90002069	ieu-b-85.vcf	CD4 on CD39+ secreting CD4 regulatory T cell	3	-0.0107063	0.0555869	0.847268	-0.119657	0.098244	0.989351	0.887225	1.10323
ebi-a-GCST90002069	ieu-b-85.vcf	CD4 on CD39+ secreting CD4 regulatory T cell	3	0.0255055	0.340873	0.952454	-0.642606	0.693617	1.02583	0.52592	2.00094
ebi-a-GCST90002069	ieu-b-85.vcf	CD4 on CD39+ secreting CD4 regulatory T cell	3	0.0184886	0.0264206	0.484065	-0.0332957	0.0702729	1.01866	0.967252	1.0728
ebi-a-GCST90002069	ieu-b-85.vcf	CD4 on CD39+ secreting CD4 regulatory T cell	3	0.0265962	0.0264154	0.420025	-0.025178	0.0783703	1.02695	0.975136	1.08152
ebi-a-GCST90002067	ieu-b-85.vcf	CD4 on CD39+ activated CD4 regulatory T cell	3	-0.0358235	0.0649655	0.581343	-0.163156	0.0915089	0.964811	0.849459	1.09583
ebi-a-GCST90002067	ieu-b-85.vcf	CD4 on CD39+ activated CD4 regulatory T cell	3	2.26198	0.636465	0.174614	1.01451	3.50945	9.60209	2.75801	33.4299
ebi-a-GCST90002067	ieu-b-85.vcf	CD4 on CD39+ activated CD4 regulatory T cell	3	-0.0246926	0.0348403	0.478487	-0.0929795	0.0435943	0.97561	0.911212	1.04456
ebi-a-GCST90002067	ieu-b-85.vcf	CD4 on CD39+ activated CD4 regulatory T cell	3	0.0132739	0.0434682	0.788935	-0.0719239	0.0984716	1.01336	0.930602	1.10348
ebi-a-GCST90002066	ieu-b-85.vcf	CD4 on activated CD4 regulatory T cell	2	0.0452702	0.111209	0.683954	-0.1727	0.26324	1.04631	0.84139	1.30114
ebi-a-GCST90002062	ieu-b-85.vcf	CD4 on CD28+ CD4+ T cell	2	-0.00238429	0.0533637	0.964362	-0.106977	0.102208	0.997619	0.898546	1.10761
ebi-a-GCST90002061	ieu-b-85.vcf	CD4 on CD39+ CD4+ T cell	6	0.014675	0.0218324	0.50148	-0.0281166	0.0574665	1.01478	0.972275	1.05915
ebi-a-GCST90002061	ieu-b-85.vcf	CD4 on CD39+ CD4+ T cell	6	-0.0103952	0.0569114	0.863952	-0.121941	0.101151	0.989659	0.8852	1.10644
ebi-a-GCST90002061	ieu-b-85.vcf	CD4 on CD39+ CD4+ T cell	6	0.00738115	0.0160125	0.644825	-0.0240033	0.0387656	1.00741	0.976283	1.03953
ebi-a-GCST90002061	ieu-b-85.vcf	CD4 on CD39+ CD4+ T cell	6	0.00617561	0.0170952	0.732677	-0.027331	0.0396822	1.00619	0.973039	1.04048
ebi-a-GCST90002060	ieu-b-85.vcf	CD8 on HLA DR+ CD8+ T cell	2	-0.0403737	0.0638325	0.527064	-0.165485	0.084738	0.960431	0.847482	1.08843
ebi-a-GCST90002059	ieu-b-85.vcf	CD8 on Natural Killer T	2	-0.062385	0.0811768	0.442185	-0.221492	0.0967215	0.939521	0.801323	1.10155
ebi-a-GCST90002056	ieu-b-85.vcf	CD8 on Effector Memory CD8+ T cell	3	-0.0253998	0.0272122	0.350614	-0.0787356	0.027936	0.97492	0.924284	1.02833
ebi-a-GCST90002056	ieu-b-85.vcf	CD8 on Effector Memory CD8+ T cell	3	0.0179082	0.123769	0.908522	-0.224679	0.260495	1.01807	0.798773	1.29757
ebi-a-GCST90002056	ieu-b-85.vcf	CD8 on Effector Memory CD8+ T cell	3	-0.0156793	0.0312984	0.616399	-0.0770242	0.0456657	0.984443	0.925867	1.04672
ebi-a-GCST90002056	ieu-b-85.vcf	CD8 on Effector Memory CD8+ T cell	3	-0.00971151	0.0371344	0.818158	-0.0824949	0.0630719	0.990335	0.920816	1.0651
ebi-a-GCST90002055	ieu-b-85.vcf	CD8 on naive CD8+ T cell	3	-0.0203764	0.0426824	0.633081	-0.104034	0.0632812	0.97983	0.901195	1.06533
ebi-a-GCST90002055	ieu-b-85.vcf	CD8 on naive CD8+ T cell	3	0.141036	0.0549653	0.236579	0.0333042	0.248768	1.15147	1.03386	1.28244
ebi-a-GCST90002055	ieu-b-85.vcf	CD8 on naive CD8+ T cell	3	-0.0161098	0.0209622	0.44218	-0.0571958	0.0249761	0.984019	0.944409	1.02529
ebi-a-GCST90002055	ieu-b-85.vcf	CD8 on naive CD8+ T cell	3	0.011522	0.0199793	0.622401	-0.0276374	0.0506815	1.01159	0.972741	1.05199
ebi-a-GCST90002054	ieu-b-85.vcf	CD8 on Central Memory CD8+ T cell	3	-0.0443718	0.0447158	0.321047	-0.132015	0.043271	0.956598	0.876328	1.04422
ebi-a-GCST90002054	ieu-b-85.vcf	CD8 on Central Memory CD8+ T cell	3	0.193544	0.0935906	0.286741	0.0101065	0.376982	1.21354	1.01016	1.45788
ebi-a-GCST90002054	ieu-b-85.vcf	CD8 on Central Memory CD8+ T cell	3	-0.0452398	0.0266391	0.089461	-0.0974524	0.00697284	0.955768	0.907146	1.007
ebi-a-GCST90002054	ieu-b-85.vcf	CD8 on Central Memory CD8+ T cell	3	0.00611923	0.0297688	0.85616	-0.0522277	0.0644661	1.00614	0.949113	1.06659
ebi-a-GCST90002052	ieu-b-85.vcf	CD45 on Immature Myeloid-Derived Suppressor Cells	2	0.0242817	0.0144337	0.0925114	-0.00400829	0.0525718	1.02458	0.996	1.05398
ebi-a-GCST90002046	ieu-b-85.vcf	CD45 on CD33- HLA DR+	2	0.021281	0.0258091	0.409625	-0.0293048	0.0718668	1.02151	0.97112	1.07451
ebi-a-GCST90002045	ieu-b-85.vcf	CD45 on CD33- HLA DR-	2	-0.0376327	0.0270844	0.164692	-0.0907181	0.0154526	0.963067	0.913275	1.01557
ebi-a-GCST90002040	ieu-b-85.vcf	CD80 on granulocyte	3	0.00853025	0.0302581	0.778008	-0.0507756	0.0678361	1.00857	0.950492	1.07019
ebi-a-GCST90002040	ieu-b-85.vcf	CD80 on granulocyte	3	0.0754249	0.0950022	0.57281	-0.110779	0.261629	1.07834	0.895136	1.29904
ebi-a-GCST90002040	ieu-b-85.vcf	CD80 on granulocyte	3	0.0217747	0.03324	0.51242	-0.0433757	0.0869251	1.02201	0.957552	1.09081
ebi-a-GCST90002040	ieu-b-85.vcf	CD80 on granulocyte	3	0.0269197	0.0433779	0.598166	-0.0581009	0.11194	1.02729	0.943555	1.11845
ebi-a-GCST90002039	ieu-b-85.vcf	CD80 on monocyte	6	-0.00180264	0.0154381	0.907046	-0.0320614	0.0284561	0.998199	0.968447	1.02886
ebi-a-GCST90002039	ieu-b-85.vcf	CD80 on monocyte	6	-0.0151873	0.0248688	0.574397	-0.0639302	0.0335555	0.984927	0.93807	1.03412
ebi-a-GCST90002039	ieu-b-85.vcf	CD80 on monocyte	6	-0.00899788	0.0185486	0.627608	-0.0453532	0.0273574	0.991042	0.95566	1.02774
ebi-a-GCST90002039	ieu-b-85.vcf	CD80 on monocyte	6	-0.00736864	0.0225006	0.756567	-0.0514698	0.0367325	0.992658	0.949832	1.03742
ebi-a-GCST90002038	ieu-b-85.vcf	CD80 on CD62L+ plasmacytoid Dendritic Cell	2	0.0207975	0.0324319	0.521349	-0.042769	0.084364	1.02102	0.958133	1.08802
ebi-a-GCST90002037	ieu-b-85.vcf	CD80 on plasmacytoid Dendritic Cell	2	0.0207652	0.0320506	0.517059	-0.0420541	0.0835844	1.02098	0.958818	1.08718
ebi-a-GCST90002036	ieu-b-85.vcf	CD80 on CD62L+ myeloid Dendritic Cell	2	-0.00281665	0.0316225	0.929025	-0.0647968	0.0591635	0.997187	0.937258	1.06095
ebi-a-GCST90002035	ieu-b-85.vcf	CD80 on myeloid Dendritic Cell	4	-0.00763299	0.0231735	0.741865	-0.0530531	0.0377871	0.992396	0.94833	1.03851
ebi-a-GCST90002035	ieu-b-85.vcf	CD80 on myeloid Dendritic Cell	4	-0.0822433	0.064564	0.330735	-0.208789	0.0443022	0.921048	0.811567	1.0453
ebi-a-GCST90002035	ieu-b-85.vcf	CD80 on myeloid Dendritic Cell	4	-0.0101732	0.0279474	0.715849	-0.0649501	0.0446037	0.989878	0.937114	1.04561
ebi-a-GCST90002035	ieu-b-85.vcf	CD80 on myeloid Dendritic Cell	4	-0.0177511	0.0444476	0.716351	-0.104868	0.0693662	0.982405	0.900443	1.07183
ebi-a-GCST90002034	ieu-b-85.vcf	CD39 on monocyte	2	-0.020452	0.0484848	0.673155	-0.115482	0.0745782	0.979756	0.890936	1.07743
ebi-a-GCST90002033	ieu-b-85.vcf	CD39 on granulocyte	2	-0.0344545	0.0602611	0.567489	-0.152566	0.0836572	0.966132	0.858502	1.08726
ebi-a-GCST90002032	ieu-b-85.vcf	CD39 on CD39+ CD4+ T cell	5	0.00525939	0.0071087	0.459389	-0.00867365	0.0191924	1.00527	0.991364	1.01938
ebi-a-GCST90002032	ieu-b-85.vcf	CD39 on CD39+ CD4+ T cell	5	0.0145586	0.0122026	0.318596	-0.00935855	0.0384758	1.01467	0.990685	1.03923
ebi-a-GCST90002032	ieu-b-85.vcf	CD39 on CD39+ CD4+ T cell	5	0.00789407	0.00730744	0.280019	-0.00642852	0.0222167	1.00793	0.993592	1.02247
ebi-a-GCST90002032	ieu-b-85.vcf	CD39 on CD39+ CD4+ T cell	5	0.00850837	0.00725384	0.305899	-0.00570915	0.0227259	1.00854	0.994307	1.02299
ebi-a-GCST90002031	ieu-b-85.vcf	CD39 on CD39+ secreting CD4 regulatory T cell	6	0.00180811	0.00702977	0.797019	-0.0119702	0.0155865	1.00181	0.988101	1.01571
ebi-a-GCST90002031	ieu-b-85.vcf	CD39 on CD39+ secreting CD4 regulatory T cell	6	0.0102354	0.0122713	0.451146	-0.0138164	0.0342872	1.01029	0.986279	1.03488
ebi-a-GCST90002031	ieu-b-85.vcf	CD39 on CD39+ secreting CD4 regulatory T cell	6	0.00466993	0.00757218	0.537418	-0.0101716	0.0195114	1.00468	0.98988	1.0197
ebi-a-GCST90002031	ieu-b-85.vcf	CD39 on CD39+ secreting CD4 regulatory T cell	6	0.00453169	0.00786263	0.589345	-0.0108791	0.0199425	1.00454	0.98918	1.02014
ebi-a-GCST90002030	ieu-b-85.vcf	CD39 on CD39+ activated CD4 regulatory T cell	6	0.00153836	0.00606801	0.799867	-0.0103549	0.0134316	1.00154	0.989698	1.01352
ebi-a-GCST90002030	ieu-b-85.vcf	CD39 on CD39+ activated CD4 regulatory T cell	6	0.00848967	0.0104411	0.461784	-0.0119748	0.0289542	1.00853	0.988097	1.02938
ebi-a-GCST90002030	ieu-b-85.vcf	CD39 on CD39+ activated CD4 regulatory T cell	6	0.00401836	0.00638481	0.529112	-0.00849587	0.0165326	1.00403	0.99154	1.01667
ebi-a-GCST90002030	ieu-b-85.vcf	CD39 on CD39+ activated CD4 regulatory T cell	6	0.00406186	0.00673391	0.572694	-0.00913661	0.0172603	1.00407	0.990905	1.01741
ebi-a-GCST90002029	ieu-b-85.vcf	CD39 on CD39+ CD8+ T cell	2	-0.0290502	0.036729	0.428983	-0.101039	0.0429386	0.971368	0.903898	1.04387
ebi-a-GCST90002027	ieu-b-85.vcf	CD4 on CD45RA+ CD4+ T cell	2	-0.00176585	0.0480442	0.970681	-0.0959325	0.0924008	0.998236	0.908525	1.0968
ebi-a-GCST90002025	ieu-b-85.vcf	CD4 on Effector Memory CD4+ T cell	2	-0.00117427	0.0482743	0.980593	-0.0957919	0.0934433	0.998826	0.908653	1.09795
ebi-a-GCST90002024	ieu-b-85.vcf	CD4 on naive CD4+ T cell	5	-0.0226673	0.0279069	0.41665	-0.0773648	0.0320302	0.977588	0.925552	1.03255
ebi-a-GCST90002024	ieu-b-85.vcf	CD4 on naive CD4+ T cell	5	-0.0309989	0.0931749	0.761256	-0.213622	0.151624	0.969477	0.807654	1.16372
ebi-a-GCST90002024	ieu-b-85.vcf	CD4 on naive CD4+ T cell	5	-0.0138393	0.0278382	0.619095	-0.0684022	0.0407236	0.986256	0.933885	1.04156
ebi-a-GCST90002024	ieu-b-85.vcf	CD4 on naive CD4+ T cell	5	0.0123843	0.0368183	0.753502	-0.0597795	0.0845481	1.01246	0.941972	1.08823
ebi-a-GCST90002023	ieu-b-85.vcf	CD4 on Central Memory CD4+ T cell	2	-0.00236263	0.0520367	0.963786	-0.104355	0.0996293	0.99764	0.900906	1.10476
ebi-a-GCST90002017	ieu-b-85.vcf	CCR2 on monocyte	2	-0.0190566	0.0200384	0.341601	-0.0583318	0.0202186	0.981124	0.943337	1.02042
ebi-a-GCST90002016	ieu-b-85.vcf	CCR2 on CD62L+ plasmacytoid Dendritic Cell	2	0.0016514	0.0300844	0.956224	-0.0573141	0.0606169	1.00165	0.944297	1.06249
ebi-a-GCST90002015	ieu-b-85.vcf	CCR2 on plasmacytoid Dendritic Cell	2	0.00163195	0.0300138	0.956638	-0.0571951	0.0604591	1.00163	0.94441	1.06232
ebi-a-GCST90002014	ieu-b-85.vcf	CCR2 on CD62L+ myeloid Dendritic Cell	3	-0.0202351	0.022227	0.362619	-0.0638001	0.0233298	0.979968	0.938193	1.0236
ebi-a-GCST90002014	ieu-b-85.vcf	CCR2 on CD62L+ myeloid Dendritic Cell	3	0.0550331	0.097606	0.67316	-0.136275	0.246341	1.05658	0.872603	1.27934
ebi-a-GCST90002014	ieu-b-85.vcf	CCR2 on CD62L+ myeloid Dendritic Cell	3	-0.00933076	0.0208721	0.654843	-0.0502401	0.0315786	0.990713	0.951001	1.03208
ebi-a-GCST90002014	ieu-b-85.vcf	CCR2 on CD62L+ myeloid Dendritic Cell	3	-0.00742705	0.0246797	0.791865	-0.0557993	0.0409452	0.9926	0.945729	1.04179
ebi-a-GCST90002013	ieu-b-85.vcf	CCR2 on myeloid Dendritic Cell	3	0.0231362	0.0210542	0.271817	-0.01813	0.0644024	1.02341	0.982033	1.06652
ebi-a-GCST90002013	ieu-b-85.vcf	CCR2 on myeloid Dendritic Cell	3	-0.0131407	0.107817	0.92279	-0.224462	0.198181	0.986945	0.798946	1.21918
ebi-a-GCST90002013	ieu-b-85.vcf	CCR2 on myeloid Dendritic Cell	3	0.0399088	0.0251976	0.113231	-0.00947848	0.0892961	1.04072	0.990566	1.0934
ebi-a-GCST90002013	ieu-b-85.vcf	CCR2 on myeloid Dendritic Cell	3	0.0461758	0.0366757	0.335061	-0.0257086	0.11806	1.04726	0.974619	1.12531
ebi-a-GCST90002012	ieu-b-85.vcf	CX3CR1 on CD14- CD16+ monocyte	2	0.0320262	0.0319169	0.315655	-0.0305308	0.0945833	1.03254	0.969931	1.0992
ebi-a-GCST90002011	ieu-b-85.vcf	CD64 on CD14+ CD16+ monocyte	2	-0.133103	0.0457924	0.00365301	-0.222857	-0.0433502	0.875375	0.80023	0.957576
ebi-a-GCST90002010	ieu-b-85.vcf	HLA DR on monocyte	4	0.0457071	0.0127484	0.000336647	0.0207203	0.0706939	1.04677	1.02094	1.07325
ebi-a-GCST90002010	ieu-b-85.vcf	HLA DR on monocyte	4	0.0794297	0.0368102	0.0163622	0.00728173	0.151578	1.08267	1.00731	1.16367
ebi-a-GCST90002010	ieu-b-85.vcf	HLA DR on monocyte	4	0.0475742	0.0138363	0.000585266	0.020455	0.0746935	1.04872	1.02067	1.07755
ebi-a-GCST90002010	ieu-b-85.vcf	HLA DR on monocyte	4	0.0520618	0.0147943	0.0389442	0.0230649	0.0810587	1.05344	1.02333	1.08443
ebi-a-GCST90002009	ieu-b-85.vcf	HLA DR on CD14- CD16-	4	0.0244917	0.0343925	0.476388	-0.0429176	0.0919011	1.02479	0.95799	1.09626
ebi-a-GCST90002009	ieu-b-85.vcf	HLA DR on CD14- CD16-	4	-0.190273	0.0818095	0.145557	-0.35062	-0.0299269	0.826733	0.704251	0.970516
ebi-a-GCST90002009	ieu-b-85.vcf	HLA DR on CD14- CD16-	4	0.0174523	0.0243019	0.472668	-0.0301795	0.065084	1.01761	0.970271	1.06725
ebi-a-GCST90002009	ieu-b-85.vcf	HLA DR on CD14- CD16-	4	0.0148475	0.028286	0.635967	-0.040593	0.070288	1.01496	0.96022	1.07282
ebi-a-GCST90002008	ieu-b-85.vcf	CCR2 on monocyte	2	-0.0158182	0.0298491	0.596154	-0.0743225	0.042686	0.984306	0.928372	1.04361
ebi-a-GCST90002007	ieu-b-85.vcf	HLA DR on CD14+ CD16+ monocyte	4	-0.0331486	0.0144366	0.0216674	-0.0614444	-0.00485285	0.967395	0.940405	0.995159
ebi-a-GCST90002007	ieu-b-85.vcf	HLA DR on CD14+ CD16+ monocyte	4	-0.123788	0.0553541	0.154822	-0.232282	-0.0152935	0.883568	0.792723	0.984823
ebi-a-GCST90002007	ieu-b-85.vcf	HLA DR on CD14+ CD16+ monocyte	4	-0.0366173	0.0151505	0.0156528	-0.0663122	-0.00692242	0.964045	0.935839	0.993101
ebi-a-GCST90002007	ieu-b-85.vcf	HLA DR on CD14+ CD16+ monocyte	4	-0.0423916	0.0155366	0.0720321	-0.0728435	-0.0119398	0.958494	0.929746	0.988131
ebi-a-GCST90002006	ieu-b-85.vcf	CD64 on monocyte	7	0.0245666	0.0199969	0.219253	-0.0146274	0.0637605	1.02487	0.985479	1.06584
ebi-a-GCST90002006	ieu-b-85.vcf	CD64 on monocyte	7	0.167821	0.03767	0.00667115	0.0939878	0.241654	1.18272	1.09855	1.27335
ebi-a-GCST90002006	ieu-b-85.vcf	CD64 on monocyte	7	0.0199828	0.018528	0.280803	-0.0163321	0.0562977	1.02018	0.983801	1.05791
ebi-a-GCST90002006	ieu-b-85.vcf	CD64 on monocyte	7	-0.0130556	0.0241881	0.608799	-0.0604644	0.0343531	0.987029	0.941327	1.03495
ebi-a-GCST90002005	ieu-b-85.vcf	CD16 on CD14+ CD16+ monocyte	5	0.0219558	0.0143384	0.125707	-0.00614756	0.0500591	1.0222	0.993871	1.05133
ebi-a-GCST90002005	ieu-b-85.vcf	CD16 on CD14+ CD16+ monocyte	5	0.0285218	0.034235	0.465903	-0.0385788	0.0956225	1.02893	0.962156	1.10034
ebi-a-GCST90002005	ieu-b-85.vcf	CD16 on CD14+ CD16+ monocyte	5	0.02262	0.0150862	0.133774	-0.00694892	0.0521888	1.02288	0.993075	1.05357
ebi-a-GCST90002005	ieu-b-85.vcf	CD16 on CD14+ CD16+ monocyte	5	0.0228039	0.0153081	0.210557	-0.00720004	0.0528078	1.02307	0.992826	1.05423
ebi-a-GCST90002004	ieu-b-85.vcf	CCR2 on CD14+ CD16- monocyte	3	-0.017233	0.0260345	0.508017	-0.0682607	0.0337947	0.982915	0.934017	1.03437
ebi-a-GCST90002004	ieu-b-85.vcf	CCR2 on CD14+ CD16- monocyte	3	-0.0288563	0.0927741	0.808026	-0.210693	0.152981	0.971556	0.810022	1.1653
ebi-a-GCST90002004	ieu-b-85.vcf	CCR2 on CD14+ CD16- monocyte	3	-0.0150822	0.0280333	0.59057	-0.0700274	0.039863	0.985031	0.932368	1.04067
ebi-a-GCST90002004	ieu-b-85.vcf	CCR2 on CD14+ CD16- monocyte	3	-0.0148843	0.0308049	0.67669	-0.0752618	0.0454933	0.985226	0.927501	1.04654
ebi-a-GCST90002003	ieu-b-85.vcf	CCR2 on CD14- CD16-	3	0.0654486	0.0346885	0.0591935	-0.00254082	0.133438	1.06764	0.997462	1.14275
ebi-a-GCST90002003	ieu-b-85.vcf	CCR2 on CD14- CD16-	3	0.160755	0.126096	0.42345	-0.0863924	0.407902	1.1744	0.917234	1.50366
ebi-a-GCST90002003	ieu-b-85.vcf	CCR2 on CD14- CD16-	3	0.0598861	0.0386933	0.121692	-0.0159528	0.135725	1.06172	0.984174	1.14537
ebi-a-GCST90002003	ieu-b-85.vcf	CCR2 on CD14- CD16-	3	0.0518469	0.0429698	0.350945	-0.032374	0.136068	1.05321	0.968144	1.14576
ebi-a-GCST90002002	ieu-b-85.vcf	PDL-1 on monocyte	2	-0.00625911	0.0646941	0.922925	-0.133059	0.120541	0.99376	0.875413	1.12811
ebi-a-GCST90001999	ieu-b-85.vcf	PDL-1 on CD14- CD16+ monocyte	2	0.0478002	0.0322857	0.13873	-0.0154799	0.11108	1.04896	0.984639	1.11748
ebi-a-GCST90001997	ieu-b-85.vcf	CX3CR1 on CD14+ CD16- monocyte	3	0.0211712	0.0144322	0.14239	-0.0071158	0.0494582	1.0214	0.992909	1.0507
ebi-a-GCST90001997	ieu-b-85.vcf	CX3CR1 on CD14+ CD16- monocyte	3	-0.0246008	0.0700751	0.785063	-0.161948	0.112746	0.975699	0.850486	1.11935
ebi-a-GCST90001997	ieu-b-85.vcf	CX3CR1 on CD14+ CD16- monocyte	3	0.0193624	0.0149069	0.193984	-0.00985519	0.0485799	1.01955	0.990193	1.04978
ebi-a-GCST90001997	ieu-b-85.vcf	CX3CR1 on CD14+ CD16- monocyte	3	0.0162805	0.0172005	0.443794	-0.0174325	0.0499934	1.01641	0.982719	1.05126
ebi-a-GCST90001996	ieu-b-85.vcf	CX3CR1 on CD14+ CD16+ monocyte	3	0.0211328	0.0158851	0.183401	-0.0100019	0.0522675	1.02136	0.990048	1.05366
ebi-a-GCST90001996	ieu-b-85.vcf	CX3CR1 on CD14+ CD16+ monocyte	3	-0.0134345	0.0389888	0.78875	-0.0898526	0.0629837	0.986655	0.914066	1.06501
ebi-a-GCST90001996	ieu-b-85.vcf	CX3CR1 on CD14+ CD16+ monocyte	3	0.0166582	0.0171337	0.330928	-0.0169239	0.0502402	1.0168	0.983219	1.05152
ebi-a-GCST90001996	ieu-b-85.vcf	CX3CR1 on CD14+ CD16+ monocyte	3	0.0163784	0.0175316	0.448813	-0.0179835	0.0507402	1.01651	0.982177	1.05205
ebi-a-GCST90001995	ieu-b-85.vcf	CX3CR1 on monocyte	3	0.0227721	0.0158951	0.151957	-0.00838223	0.0539264	1.02303	0.991653	1.05541
ebi-a-GCST90001995	ieu-b-85.vcf	CX3CR1 on monocyte	3	-0.0257546	0.0659898	0.763114	-0.155095	0.103585	0.974574	0.856334	1.10914
ebi-a-GCST90001995	ieu-b-85.vcf	CX3CR1 on monocyte	3	0.0196314	0.0169869	0.247812	-0.0136629	0.0529258	1.01983	0.98643	1.05435
ebi-a-GCST90001995	ieu-b-85.vcf	CX3CR1 on monocyte	3	0.0173494	0.0193561	0.464669	-0.0205887	0.0552874	1.0175	0.979622	1.05684
ebi-a-GCST90001994	ieu-b-85.vcf	CX3CR1 on CD14- CD16-	3	-0.00481647	0.026638	0.856515	-0.0570269	0.047394	0.995195	0.944569	1.04854
ebi-a-GCST90001994	ieu-b-85.vcf	CX3CR1 on CD14- CD16-	3	-0.0642145	0.0558609	0.455782	-0.173702	0.0452729	0.937804	0.840547	1.04631
ebi-a-GCST90001994	ieu-b-85.vcf	CX3CR1 on CD14- CD16-	3	-0.0074877	0.0287947	0.794835	-0.0639253	0.0489499	0.99254	0.938075	1.05017
ebi-a-GCST90001994	ieu-b-85.vcf	CX3CR1 on CD14- CD16-	3	-0.0242478	0.0349417	0.55948	-0.0927335	0.0442378	0.976044	0.911436	1.04523
ebi-a-GCST90001992	ieu-b-85.vcf	CCR2 on CD14+ CD16+ monocyte	2	-0.0752027	0.0525444	0.152367	-0.17819	0.0277844	0.927555	0.836784	1.02817
ebi-a-GCST90001991	ieu-b-85.vcf	HLA DR on CD14+ monocyte	3	0.0393904	0.0389024	0.311277	-0.0368582	0.115639	1.04018	0.963813	1.12259
ebi-a-GCST90001991	ieu-b-85.vcf	HLA DR on CD14+ monocyte	3	0.115187	0.277028	0.749141	-0.427788	0.658162	1.12208	0.65195	1.93124
ebi-a-GCST90001991	ieu-b-85.vcf	HLA DR on CD14+ monocyte	3	0.0488222	0.0133511	0.00025538	0.0226541	0.0749903	1.05003	1.02291	1.07787
ebi-a-GCST90001991	ieu-b-85.vcf	HLA DR on CD14+ monocyte	3	0.0488782	0.013946	0.0726487	0.021544	0.0762124	1.05009	1.02178	1.07919
ebi-a-GCST90001990	ieu-b-85.vcf	CD64 on CD14- CD16+ monocyte	2	0.0569515	0.0851355	0.503527	-0.109914	0.223817	1.0586	0.895911	1.25084
ebi-a-GCST90001989	ieu-b-85.vcf	CD40 on CD14- CD16+ monocyte	8	-0.00904532	0.0124418	0.467218	-0.0334312	0.0153405	0.990995	0.967121	1.01546
ebi-a-GCST90001989	ieu-b-85.vcf	CD40 on CD14- CD16+ monocyte	8	0.0311871	0.0356299	0.415068	-0.0386475	0.101022	1.03168	0.96209	1.1063
ebi-a-GCST90001989	ieu-b-85.vcf	CD40 on CD14- CD16+ monocyte	8	-0.00807313	0.0106305	0.447595	-0.0289089	0.0127626	0.991959	0.971505	1.01284
ebi-a-GCST90001989	ieu-b-85.vcf	CD40 on CD14- CD16+ monocyte	8	-0.00841625	0.0100757	0.431132	-0.0281647	0.0113322	0.991619	0.972228	1.0114
ebi-a-GCST90001988	ieu-b-85.vcf	HLA DR on CD14+ CD16- monocyte	3	0.0382842	0.0378101	0.31128	-0.0358235	0.112392	1.03903	0.964811	1.11895
ebi-a-GCST90001988	ieu-b-85.vcf	HLA DR on CD14+ CD16- monocyte	3	0.104243	0.25924	0.756606	-0.403867	0.612352	1.10987	0.667733	1.84477
ebi-a-GCST90001988	ieu-b-85.vcf	HLA DR on CD14+ CD16- monocyte	3	0.0473694	0.0129776	0.00026214	0.0219333	0.0728054	1.04851	1.02218	1.07552
ebi-a-GCST90001988	ieu-b-85.vcf	HLA DR on CD14+ CD16- monocyte	3	0.0473971	0.0137091	0.0744381	0.0205274	0.0742669	1.04854	1.02074	1.07709
ebi-a-GCST90001987	ieu-b-85.vcf	CD64 on CD14+ CD16- monocyte	7	0.0215968	0.0188342	0.251514	-0.0153182	0.0585117	1.02183	0.984799	1.06026
ebi-a-GCST90001987	ieu-b-85.vcf	CD64 on CD14+ CD16- monocyte	7	0.159128	0.0371022	0.00779715	0.0864077	0.231849	1.17249	1.09025	1.26093
ebi-a-GCST90001987	ieu-b-85.vcf	CD64 on CD14+ CD16- monocyte	7	0.0151223	0.017136	0.377513	-0.0184642	0.0487088	1.01524	0.981705	1.04991
ebi-a-GCST90001987	ieu-b-85.vcf	CD64 on CD14+ CD16- monocyte	7	-0.0122727	0.0204035	0.56952	-0.0522635	0.0277181	0.987802	0.949079	1.02811
ebi-a-GCST90001985	ieu-b-85.vcf	CD40 on monocytes	5	-0.00975289	0.011986	0.415822	-0.0332454	0.0137396	0.990295	0.967301	1.01383
ebi-a-GCST90001985	ieu-b-85.vcf	CD40 on monocytes	5	0.0186752	0.0218287	0.455144	-0.0241091	0.0614596	1.01885	0.976179	1.06339
ebi-a-GCST90001985	ieu-b-85.vcf	CD40 on monocytes	5	-0.00736369	0.0106444	0.489067	-0.0282266	0.0134993	0.992663	0.972168	1.01359
ebi-a-GCST90001985	ieu-b-85.vcf	CD40 on monocytes	5	-0.00693592	0.0107913	0.555387	-0.0280869	0.014215	0.993088	0.972304	1.01432
ebi-a-GCST90001984	ieu-b-85.vcf	HLA DR on CD14- CD16+ monocyte	7	-0.0329686	0.0214671	0.124593	-0.0750441	0.00910683	0.967569	0.927703	1.00915
ebi-a-GCST90001984	ieu-b-85.vcf	HLA DR on CD14- CD16+ monocyte	7	-0.0730186	0.0625325	0.29558	-0.195582	0.0495451	0.929584	0.822356	1.05079
ebi-a-GCST90001984	ieu-b-85.vcf	HLA DR on CD14- CD16+ monocyte	7	-0.0430847	0.0157628	0.00627005	-0.0739798	-0.0121896	0.95783	0.92869	0.987884
ebi-a-GCST90001984	ieu-b-85.vcf	HLA DR on CD14- CD16+ monocyte	7	-0.0478274	0.0143854	0.0159109	-0.0760228	-0.019632	0.953298	0.926795	0.980559
ebi-a-GCST90001983	ieu-b-85.vcf	CD14 on CD14+ CD16+ monocyte	2	-0.00723379	0.0353669	0.837935	-0.0765528	0.0620853	0.992792	0.926304	1.06405
ebi-a-GCST90001981	ieu-b-85.vcf	CD40 on CD14+ CD16+ monocyte	5	-0.0103082	0.0142591	0.469727	-0.038256	0.0176396	0.989745	0.962467	1.0178
ebi-a-GCST90001981	ieu-b-85.vcf	CD40 on CD14+ CD16+ monocyte	5	-0.00704392	0.0366329	0.8598	-0.0788444	0.0647566	0.992981	0.924184	1.0669
ebi-a-GCST90001981	ieu-b-85.vcf	CD40 on CD14+ CD16+ monocyte	5	-0.00794633	0.0111447	0.475838	-0.02979	0.0138973	0.992085	0.970649	1.01399
ebi-a-GCST90001981	ieu-b-85.vcf	CD40 on CD14+ CD16+ monocyte	5	-0.00833653	0.0110429	0.492307	-0.0299805	0.0133075	0.991698	0.970464	1.0134
ebi-a-GCST90001980	ieu-b-85.vcf	CD40 on CD14+ CD16- monocyte	4	-0.00908243	0.0107399	0.397737	-0.0301327	0.0119678	0.990959	0.970317	1.01204
ebi-a-GCST90001980	ieu-b-85.vcf	CD40 on CD14+ CD16- monocyte	4	0.0249357	0.0290349	0.480938	-0.0319726	0.0818441	1.02525	0.968533	1.08529
ebi-a-GCST90001980	ieu-b-85.vcf	CD40 on CD14+ CD16- monocyte	4	-0.00762187	0.0115286	0.50853	-0.0302179	0.0149742	0.992407	0.970234	1.01509
ebi-a-GCST90001980	ieu-b-85.vcf	CD40 on CD14+ CD16- monocyte	4	-0.00629544	0.0127395	0.655107	-0.0312648	0.0186739	0.993724	0.969219	1.01885
ebi-a-GCST90001979	ieu-b-85.vcf	CD16 on CD14- CD16+ monocyte	9	0.0154984	0.00973659	0.111436	-0.0035853	0.0345821	1.01562	0.996421	1.03519
ebi-a-GCST90001979	ieu-b-85.vcf	CD16 on CD14- CD16+ monocyte	9	0.0183028	0.0145372	0.248377	-0.0101901	0.0467957	1.01847	0.989862	1.04791
ebi-a-GCST90001979	ieu-b-85.vcf	CD16 on CD14- CD16+ monocyte	9	0.0165024	0.0109302	0.131094	-0.00492078	0.0379256	1.01664	0.995091	1.03865
ebi-a-GCST90001979	ieu-b-85.vcf	CD16 on CD14- CD16+ monocyte	9	0.0166401	0.0112244	0.176493	-0.00535972	0.03864	1.01678	0.994655	1.0394
ebi-a-GCST90001976	ieu-b-85.vcf	FSC-A on Natural Killer T	2	0.0730238	0.054538	0.180586	-0.0338707	0.179918	1.07576	0.966697	1.19712
ebi-a-GCST90001973	ieu-b-85.vcf	FSC-A on CD4+ T cell	2	-0.0126468	0.170474	0.940862	-0.346777	0.321483	0.987433	0.706963	1.37917
ebi-a-GCST90001970	ieu-b-85.vcf	FSC-A on HLA DR+ Natural Killer	4	0.0123855	0.0200053	0.535843	-0.0268248	0.0515958	1.01246	0.973532	1.05295
ebi-a-GCST90001970	ieu-b-85.vcf	FSC-A on HLA DR+ Natural Killer	4	0.0571319	0.04068	0.295354	-0.022601	0.136865	1.0588	0.977653	1.14667
ebi-a-GCST90001970	ieu-b-85.vcf	FSC-A on HLA DR+ Natural Killer	4	0.0133562	0.0217326	0.538839	-0.0292397	0.0559521	1.01345	0.971184	1.05755
ebi-a-GCST90001970	ieu-b-85.vcf	FSC-A on HLA DR+ Natural Killer	4	0.0338497	0.0220645	0.22255	-0.00939667	0.077096	1.03443	0.990647	1.08015
ebi-a-GCST90001969	ieu-b-85.vcf	FSC-A on Natural Killer	3	0.0763388	0.0252304	0.00248086	0.0268872	0.12579	1.07933	1.02725	1.13404
ebi-a-GCST90001969	ieu-b-85.vcf	FSC-A on Natural Killer	3	0.0736087	0.0603812	0.437356	-0.0447384	0.191956	1.07639	0.956248	1.21162
ebi-a-GCST90001969	ieu-b-85.vcf	FSC-A on Natural Killer	3	0.0746523	0.0280296	0.00773694	0.0197143	0.12959	1.07751	1.01991	1.13836
ebi-a-GCST90001969	ieu-b-85.vcf	FSC-A on Natural Killer	3	0.0741077	0.0322359	0.148258	0.0109254	0.13729	1.07692	1.01099	1.14716
ebi-a-GCST90001965	ieu-b-85.vcf	FSC-A on monocyte	2	0.00495537	0.0501114	0.921228	-0.0932631	0.103174	1.00497	0.910954	1.10868
ebi-a-GCST90001964	ieu-b-85.vcf	FSC-A on plasmacytoid Dendritic Cell	4	-0.0081592	0.0340713	0.810738	-0.074939	0.0586206	0.991874	0.9278	1.06037
ebi-a-GCST90001964	ieu-b-85.vcf	FSC-A on plasmacytoid Dendritic Cell	4	0.0421734	0.0885492	0.680839	-0.131383	0.21573	1.04308	0.876882	1.24077
ebi-a-GCST90001964	ieu-b-85.vcf	FSC-A on plasmacytoid Dendritic Cell	4	0.00129417	0.040627	0.974588	-0.0783347	0.0809231	1.0013	0.924655	1.08429
ebi-a-GCST90001964	ieu-b-85.vcf	FSC-A on plasmacytoid Dendritic Cell	4	-0.00422539	0.0417448	0.925762	-0.0860452	0.0775944	0.995784	0.917553	1.08068
ebi-a-GCST90001963	ieu-b-85.vcf	FSC-A on myeloid Dendritic Cell	3	-0.00499713	0.027128	0.853852	-0.058168	0.0481737	0.995015	0.943491	1.04935
ebi-a-GCST90001963	ieu-b-85.vcf	FSC-A on myeloid Dendritic Cell	3	-0.431915	0.241747	0.324846	-0.905738	0.0419093	0.649265	0.404243	1.0428
ebi-a-GCST90001963	ieu-b-85.vcf	FSC-A on myeloid Dendritic Cell	3	-0.0212531	0.0246023	0.387661	-0.0694736	0.0269674	0.978971	0.932885	1.02733
ebi-a-GCST90001963	ieu-b-85.vcf	FSC-A on myeloid Dendritic Cell	3	-0.0241083	0.0250448	0.437314	-0.073196	0.0249795	0.97618	0.929419	1.02529
ebi-a-GCST90001961	ieu-b-85.vcf	CD25 on CD39+ CD4+ T cell	6	-0.0104416	0.0145129	0.471851	-0.0388868	0.0180036	0.989613	0.96186	1.01817
ebi-a-GCST90001961	ieu-b-85.vcf	CD25 on CD39+ CD4+ T cell	6	-0.0209903	0.0536244	0.715436	-0.126094	0.0841136	0.979228	0.881532	1.08775
ebi-a-GCST90001961	ieu-b-85.vcf	CD25 on CD39+ CD4+ T cell	6	-0.0055226	0.0105792	0.601653	-0.0262578	0.0152126	0.994493	0.974084	1.01533
ebi-a-GCST90001961	ieu-b-85.vcf	CD25 on CD39+ CD4+ T cell	6	-0.00520991	0.0107756	0.649175	-0.02633	0.0159102	0.994804	0.974014	1.01604
ebi-a-GCST90001957	ieu-b-85.vcf	CD33 on CD33+ HLA DR+ CD14-	4	-0.0113485	0.00654334	0.0828534	-0.0241735	0.00147641	0.988716	0.976116	1.00148
ebi-a-GCST90001957	ieu-b-85.vcf	CD33 on CD33+ HLA DR+ CD14-	4	-0.014688	0.0117727	0.338438	-0.0377624	0.00838644	0.985419	0.962942	1.00842
ebi-a-GCST90001957	ieu-b-85.vcf	CD33 on CD33+ HLA DR+ CD14-	4	-0.0119552	0.0069891	0.0871631	-0.0256539	0.00174339	0.988116	0.974672	1.00174
ebi-a-GCST90001957	ieu-b-85.vcf	CD33 on CD33+ HLA DR+ CD14-	4	-0.0119438	0.0072872	0.199741	-0.0262267	0.00233913	0.988127	0.974114	1.00234
ebi-a-GCST90001956	ieu-b-85.vcf	CD33 on CD33+ HLA DR+	4	-0.0113744	0.00657244	0.0835198	-0.0242564	0.00150759	0.98869	0.976035	1.00151
ebi-a-GCST90001956	ieu-b-85.vcf	CD33 on CD33+ HLA DR+	4	-0.0146149	0.0117892	0.340821	-0.0377218	0.00849205	0.985491	0.962981	1.00853
ebi-a-GCST90001956	ieu-b-85.vcf	CD33 on CD33+ HLA DR+	4	-0.0119832	0.00665843	0.0719079	-0.0250337	0.00106734	0.988088	0.975277	1.00107
ebi-a-GCST90001956	ieu-b-85.vcf	CD33 on CD33+ HLA DR+	4	-0.0122673	0.00739526	0.195737	-0.026762	0.00222743	0.987808	0.973593	1.00223
ebi-a-GCST90001955	ieu-b-85.vcf	CD33 on Immature Myeloid-Derived Suppressor Cells	6	-0.0104658	0.00701798	0.135888	-0.024221	0.00328948	0.989589	0.97607	1.00329
ebi-a-GCST90001955	ieu-b-85.vcf	CD33 on Immature Myeloid-Derived Suppressor Cells	6	-0.0106101	0.015132	0.521846	-0.0402688	0.0190487	0.989446	0.960531	1.01923
ebi-a-GCST90001955	ieu-b-85.vcf	CD33 on Immature Myeloid-Derived Suppressor Cells	6	-0.010599	0.00732796	0.148071	-0.0249618	0.0037638	0.989457	0.975347	1.00377
ebi-a-GCST90001955	ieu-b-85.vcf	CD33 on Immature Myeloid-Derived Suppressor Cells	6	-0.0105647	0.0074917	0.217555	-0.0252484	0.00411907	0.989491	0.975068	1.00413
ebi-a-GCST90001954	ieu-b-85.vcf	CD33 on basophil	7	-0.0105851	0.00680036	0.119576	-0.0239138	0.00274358	0.989471	0.97637	1.00275
ebi-a-GCST90001954	ieu-b-85.vcf	CD33 on basophil	7	-0.0115375	0.0148578	0.472553	-0.0406588	0.0175837	0.988529	0.960157	1.01774
ebi-a-GCST90001954	ieu-b-85.vcf	CD33 on basophil	7	-0.0109935	0.00723155	0.128457	-0.0251673	0.00318034	0.989067	0.975147	1.00319
ebi-a-GCST90001954	ieu-b-85.vcf	CD33 on basophil	7	-0.0113622	0.00734713	0.172949	-0.0257626	0.00303818	0.988702	0.974566	1.00304
ebi-a-GCST90001953	ieu-b-85.vcf	CD33 on CD33dim HLA DR-	6	-0.0125052	0.00681369	0.0664601	-0.0258601	0.000849614	0.987573	0.974471	1.00085
ebi-a-GCST90001953	ieu-b-85.vcf	CD33 on CD33dim HLA DR-	6	-0.00799231	0.013306	0.580446	-0.0340722	0.0180875	0.99204	0.966502	1.01825
ebi-a-GCST90001953	ieu-b-85.vcf	CD33 on CD33dim HLA DR-	6	-0.0125218	0.00747334	0.0938293	-0.0271696	0.0021259	0.987556	0.973196	1.00213
ebi-a-GCST90001953	ieu-b-85.vcf	CD33 on CD33dim HLA DR-	6	-0.0126023	0.00720987	0.140898	-0.0267337	0.00152902	0.987477	0.973621	1.00153
ebi-a-GCST90001952	ieu-b-85.vcf	CD33 on Monocytic Myeloid-Derived Suppressor Cells	4	-0.0122742	0.00694596	0.0772117	-0.0258883	0.00133988	0.987801	0.974444	1.00134
ebi-a-GCST90001952	ieu-b-85.vcf	CD33 on Monocytic Myeloid-Derived Suppressor Cells	4	-0.016365	0.012518	0.32119	-0.0409003	0.00817029	0.983768	0.959925	1.0082
ebi-a-GCST90001952	ieu-b-85.vcf	CD33 on Monocytic Myeloid-Derived Suppressor Cells	4	-0.0129162	0.00692352	0.0621033	-0.0264863	0.000653872	0.987167	0.973861	1.00065
ebi-a-GCST90001952	ieu-b-85.vcf	CD33 on Monocytic Myeloid-Derived Suppressor Cells	4	-0.0127917	0.00759269	0.190626	-0.0276734	0.00208994	0.98729	0.972706	1.00209
ebi-a-GCST90001951	ieu-b-85.vcf	CD33 on CD66b++ myeloid cell	4	-0.0105616	0.00990471	0.286279	-0.0299748	0.00885165	0.989494	0.97047	1.00889
ebi-a-GCST90001951	ieu-b-85.vcf	CD33 on CD66b++ myeloid cell	4	-0.027258	0.0174044	0.257808	-0.0613705	0.00685459	0.97311	0.940475	1.00688
ebi-a-GCST90001951	ieu-b-85.vcf	CD33 on CD66b++ myeloid cell	4	-0.0118978	0.00861378	0.167201	-0.0287808	0.0049852	0.988173	0.971629	1.005
ebi-a-GCST90001951	ieu-b-85.vcf	CD33 on CD66b++ myeloid cell	4	-0.0146273	0.00923212	0.211276	-0.0327222	0.00346771	0.985479	0.967807	1.00347
ebi-a-GCST90001950	ieu-b-85.vcf	CD33 on Granulocytic Myeloid-Derived Suppressor Cells	3	-0.0140472	0.00951456	0.13984	-0.0326957	0.00460136	0.986051	0.967833	1.00461
ebi-a-GCST90001950	ieu-b-85.vcf	CD33 on Granulocytic Myeloid-Derived Suppressor Cells	3	-0.0209584	0.0240446	0.543589	-0.0680857	0.026169	0.97926	0.93418	1.02651
ebi-a-GCST90001950	ieu-b-85.vcf	CD33 on Granulocytic Myeloid-Derived Suppressor Cells	3	-0.0149032	0.0100001	0.136143	-0.0345034	0.00469694	0.985207	0.966085	1.00471
ebi-a-GCST90001950	ieu-b-85.vcf	CD33 on Granulocytic Myeloid-Derived Suppressor Cells	3	-0.0149798	0.00950101	0.255587	-0.0336017	0.00364223	0.985132	0.966957	1.00365
ebi-a-GCST90001949	ieu-b-85.vcf	CD33 on CD33dim HLA DR+ CD11b-	7	-0.00752752	0.00800745	0.347184	-0.0232221	0.00816708	0.992501	0.977045	1.0082
ebi-a-GCST90001949	ieu-b-85.vcf	CD33 on CD33dim HLA DR+ CD11b-	7	-0.0268987	0.0113044	0.0632057	-0.0490554	-0.00474199	0.97346	0.952128	0.995269
ebi-a-GCST90001949	ieu-b-85.vcf	CD33 on CD33dim HLA DR+ CD11b-	7	-0.0110877	0.00702492	0.11449	-0.0248565	0.0026812	0.988974	0.97545	1.00268
ebi-a-GCST90001949	ieu-b-85.vcf	CD33 on CD33dim HLA DR+ CD11b-	7	-0.0129098	0.00762933	0.141568	-0.0278633	0.00204363	0.987173	0.972521	1.00205
ebi-a-GCST90001948	ieu-b-85.vcf	CD33 on CD33dim HLA DR+ CD11b+	7	-0.00859923	0.00862605	0.318818	-0.0255063	0.00830784	0.991438	0.974816	1.00834
ebi-a-GCST90001948	ieu-b-85.vcf	CD33 on CD33dim HLA DR+ CD11b+	7	-0.0267728	0.0122256	0.0801069	-0.0507349	-0.00281064	0.973582	0.950531	0.997193
ebi-a-GCST90001948	ieu-b-85.vcf	CD33 on CD33dim HLA DR+ CD11b+	7	-0.0116854	0.00729154	0.109023	-0.0259768	0.002606	0.988383	0.974358	1.00261
ebi-a-GCST90001948	ieu-b-85.vcf	CD33 on CD33dim HLA DR+ CD11b+	7	-0.0125751	0.0073815	0.139347	-0.0270428	0.00189268	0.987504	0.97332	1.00189
ebi-a-GCST90001947	ieu-b-85.vcf	CD33 on CD33+ HLA DR+ CD14dim	4	-0.011445	0.00661484	0.0835938	-0.0244101	0.00152006	0.98862	0.975885	1.00152
ebi-a-GCST90001947	ieu-b-85.vcf	CD33 on CD33+ HLA DR+ CD14dim	4	-0.0145232	0.0117565	0.342129	-0.0375659	0.0085195	0.985582	0.963131	1.00856
ebi-a-GCST90001947	ieu-b-85.vcf	CD33 on CD33+ HLA DR+ CD14dim	4	-0.0120268	0.00687592	0.0802702	-0.0255036	0.00144999	0.988045	0.974819	1.00145
ebi-a-GCST90001947	ieu-b-85.vcf	CD33 on CD33+ HLA DR+ CD14dim	4	-0.0122628	0.00732666	0.192779	-0.026623	0.00209749	0.987812	0.973728	1.0021
ebi-a-GCST90001946	ieu-b-85.vcf	CD33 on CD14+ monocyte	6	-0.0106428	0.00879397	0.226185	-0.027879	0.00659333	0.989414	0.972506	1.00662
ebi-a-GCST90001946	ieu-b-85.vcf	CD33 on CD14+ monocyte	6	-0.0258928	0.0139284	0.136561	-0.0531925	0.00140697	0.97444	0.948197	1.00141
ebi-a-GCST90001946	ieu-b-85.vcf	CD33 on CD14+ monocyte	6	-0.0131964	0.00724247	0.0684411	-0.0273917	0.0009988	0.98689	0.97298	1.001
ebi-a-GCST90001946	ieu-b-85.vcf	CD33 on CD14+ monocyte	6	-0.0138511	0.00778632	0.135387	-0.0291123	0.0014101	0.986244	0.971307	1.00141
ebi-a-GCST90001945	ieu-b-85.vcf	CD123 on CD62L+ plasmacytoid Dendritic Cell	2	0.0199044	0.030383	0.512392	-0.0396462	0.0794551	1.0201	0.961129	1.0827
ebi-a-GCST90001944	ieu-b-85.vcf	CD123 on plasmacytoid Dendritic Cell	2	0.0198329	0.0300249	0.508902	-0.0390159	0.0786816	1.02003	0.961735	1.08186
ebi-a-GCST90001933	ieu-b-85.vcf	CD25 on CD45RA- CD4 not regulatory T cell	2	-0.0354491	0.022533	0.115671	-0.0796137	0.0087156	0.965172	0.923473	1.00875
ebi-a-GCST90001932	ieu-b-85.vcf	CD127 on CD45RA+ CD4+ T cell	2	0.0317265	0.0791952	0.688706	-0.123496	0.186949	1.03224	0.883825	1.20557
ebi-a-GCST90001926	ieu-b-85.vcf	CD127 on granulocyte	7	0.0254772	0.02099	0.224832	-0.0156632	0.0666177	1.0258	0.984459	1.06889
ebi-a-GCST90001926	ieu-b-85.vcf	CD127 on granulocyte	7	0.00567434	0.0346767	0.876427	-0.0622921	0.0736407	1.00569	0.939608	1.07642
ebi-a-GCST90001926	ieu-b-85.vcf	CD127 on granulocyte	7	0.00729042	0.024196	0.763181	-0.0401338	0.0547146	1.00732	0.960661	1.05624
ebi-a-GCST90001926	ieu-b-85.vcf	CD127 on granulocyte	7	0.00250146	0.0277468	0.9311	-0.0518822	0.0568851	1.0025	0.949441	1.05853
ebi-a-GCST90001924	ieu-b-85.vcf	CD127 on CD28+ CD4+ T cell	3	0.0169026	0.0584866	0.772581	-0.0977311	0.131536	1.01705	0.906893	1.14058
ebi-a-GCST90001924	ieu-b-85.vcf	CD127 on CD28+ CD4+ T cell	3	0.421834	0.133379	0.19496	0.160411	0.683258	1.52476	1.17399	1.98032
ebi-a-GCST90001924	ieu-b-85.vcf	CD127 on CD28+ CD4+ T cell	3	-0.0348615	0.03989	0.382151	-0.113046	0.0433229	0.965739	0.89311	1.04428
ebi-a-GCST90001924	ieu-b-85.vcf	CD127 on CD28+ CD4+ T cell	3	-0.0532956	0.048948	0.38995	-0.149234	0.0426425	0.9481	0.861368	1.04356
ebi-a-GCST90001920	ieu-b-85.vcf	CD45 on HLA DR+ CD4+ T cell	2	-0.0293572	0.0394804	0.457125	-0.106739	0.0480244	0.97107	0.89876	1.0492
ebi-a-GCST90001917	ieu-b-85.vcf	CD45 on CD8+ T cell	2	-0.00487625	0.0225244	0.828608	-0.0490242	0.0392717	0.995136	0.952158	1.04005
ebi-a-GCST90001911	ieu-b-85.vcf	CD45 on Natural Killer	2	-0.00113883	0.0391124	0.976771	-0.0777991	0.0755214	0.998862	0.92515	1.07845
ebi-a-GCST90001910	ieu-b-85.vcf	CD45 on B cell	2	-0.00686909	0.0434812	0.874474	-0.0920922	0.078354	0.993154	0.912021	1.08151
ebi-a-GCST90001908	ieu-b-85.vcf	CCR7 on naive CD8+ T cell	2	-0.00570414	0.0667028	0.931851	-0.136442	0.125033	0.994312	0.872457	1.13319
ebi-a-GCST90001907	ieu-b-85.vcf	CCR7 on naive CD4+ T cell	4	-0.0172418	0.0300778	0.566482	-0.0761943	0.0417107	0.982906	0.926636	1.04259
ebi-a-GCST90001907	ieu-b-85.vcf	CCR7 on naive CD4+ T cell	4	0.0595031	0.0769176	0.520093	-0.0912553	0.210262	1.06131	0.912785	1.234
ebi-a-GCST90001907	ieu-b-85.vcf	CCR7 on naive CD4+ T cell	4	-0.0272347	0.027734	0.326102	-0.0815934	0.027124	0.973133	0.921647	1.0275
ebi-a-GCST90001907	ieu-b-85.vcf	CCR7 on naive CD4+ T cell	4	-0.0455568	0.0361011	0.296164	-0.116315	0.0252013	0.955465	0.890195	1.02552
ebi-a-GCST90001901	ieu-b-85.vcf	CD28 on CD39+ resting CD4 regulatory T cell	2	-0.0194214	0.0391127	0.619508	-0.0960823	0.0572396	0.980766	0.908389	1.05891
ebi-a-GCST90001898	ieu-b-85.vcf	CD28 on CD4+ T cell	2	-0.00827615	0.0229402	0.718271	-0.053239	0.0366867	0.991758	0.948153	1.03737
ebi-a-GCST90001897	ieu-b-85.vcf	CD28 on CD39+ CD8+ T cell	2	0.00587505	0.0111944	0.599708	-0.016066	0.0278161	1.00589	0.984062	1.02821
ebi-a-GCST90001896	ieu-b-85.vcf	CD28 on CD28+ CD45RA+ CD8+ T cell	3	-0.00919054	0.0192051	0.632261	-0.0468325	0.0284514	0.990852	0.954247	1.02886
ebi-a-GCST90001896	ieu-b-85.vcf	CD28 on CD28+ CD45RA+ CD8+ T cell	3	0.0413226	0.0691184	0.656964	-0.0941494	0.176795	1.04219	0.910147	1.19339
ebi-a-GCST90001896	ieu-b-85.vcf	CD28 on CD28+ CD45RA+ CD8+ T cell	3	-0.0087866	0.0201353	0.662562	-0.0482517	0.0306785	0.991252	0.952894	1.03115
ebi-a-GCST90001896	ieu-b-85.vcf	CD28 on CD28+ CD45RA+ CD8+ T cell	3	-0.00257034	0.0213265	0.915085	-0.0443703	0.0392296	0.997433	0.9566	1.04001
ebi-a-GCST90001894	ieu-b-85.vcf	CD28 on CD28+ CD4+ T cell	2	-0.00780847	0.0216671	0.71856	-0.050276	0.0346591	0.992222	0.950967	1.03527
ebi-a-GCST90001892	ieu-b-85.vcf	CD28 on CD39+ CD4+ T cell	5	0.0291701	0.0355872	0.412399	-0.0405809	0.0989211	1.0296	0.960232	1.10398
ebi-a-GCST90001892	ieu-b-85.vcf	CD28 on CD39+ CD4+ T cell	5	0.0157564	0.0999833	0.884789	-0.180211	0.211724	1.01588	0.835094	1.23581
ebi-a-GCST90001892	ieu-b-85.vcf	CD28 on CD39+ CD4+ T cell	5	0.0102249	0.027587	0.710905	-0.0438457	0.0642954	1.01028	0.957102	1.06641
ebi-a-GCST90001892	ieu-b-85.vcf	CD28 on CD39+ CD4+ T cell	5	0.00981746	0.0301286	0.76087	-0.0492345	0.0688694	1.00987	0.951958	1.0713
ebi-a-GCST90001891	ieu-b-85.vcf	CD28 on CD45RA- CD4 not regulatory T cell	3	-0.0374466	0.0255313	0.14246	-0.0874879	0.0125948	0.963246	0.91623	1.01267
ebi-a-GCST90001891	ieu-b-85.vcf	CD28 on CD45RA- CD4 not regulatory T cell	3	0.0285532	0.0451851	0.641228	-0.0600095	0.117116	1.02896	0.941756	1.12425
ebi-a-GCST90001891	ieu-b-85.vcf	CD28 on CD45RA- CD4 not regulatory T cell	3	-0.0248961	0.0217815	0.253041	-0.0675877	0.0177956	0.975411	0.934646	1.01795
ebi-a-GCST90001891	ieu-b-85.vcf	CD28 on CD45RA- CD4 not regulatory T cell	3	-0.0218745	0.0232715	0.446459	-0.0674866	0.0237377	0.978363	0.93474	1.02402
ebi-a-GCST90001890	ieu-b-85.vcf	CD28 on CD45RA+ CD4+ T cell	2	-0.0145155	0.0204975	0.478846	-0.0546905	0.0256595	0.985589	0.946778	1.02599
ebi-a-GCST90001888	ieu-b-85.vcf	CD28 on CD39+ secreting CD4 regulatory T cell	2	0.0228699	0.0555883	0.680768	-0.0860832	0.131823	1.02313	0.917518	1.14091
ebi-a-GCST90001887	ieu-b-85.vcf	CD28 on secreting CD4 regulatory T cell	3	-0.00873827	0.0376955	0.816684	-0.0826214	0.0651449	0.9913	0.9207	1.06731
ebi-a-GCST90001887	ieu-b-85.vcf	CD28 on secreting CD4 regulatory T cell	3	-0.076389	0.0942462	0.566381	-0.261112	0.108334	0.926456	0.770195	1.11442
ebi-a-GCST90001887	ieu-b-85.vcf	CD28 on secreting CD4 regulatory T cell	3	-0.0110534	0.0244798	0.651607	-0.0590338	0.036927	0.989007	0.942675	1.03762
ebi-a-GCST90001887	ieu-b-85.vcf	CD28 on secreting CD4 regulatory T cell	3	-0.0198991	0.025103	0.511048	-0.0691009	0.0293026	0.980298	0.933232	1.02974
ebi-a-GCST90001886	ieu-b-85.vcf	CD28 on CD39+ activated CD4 regulatory T cell	2	0.0105526	0.0282724	0.708964	-0.0448613	0.0659665	1.01061	0.95613	1.06819
ebi-a-GCST90001885	ieu-b-85.vcf	CD16-CD56 on HLA DR+ Natural Killer	2	-0.0482443	0.0457452	0.291594	-0.137905	0.0414163	0.952901	0.871182	1.04229
ebi-a-GCST90001884	ieu-b-85.vcf	CD16-CD56 on Natural Killer	7	0.00804271	0.0149109	0.589622	-0.0211827	0.0372681	1.00808	0.97904	1.03797
ebi-a-GCST90001884	ieu-b-85.vcf	CD16-CD56 on Natural Killer	7	0.00764834	0.0353462	0.83724	-0.0616302	0.0769268	1.00768	0.940231	1.07996
ebi-a-GCST90001884	ieu-b-85.vcf	CD16-CD56 on Natural Killer	7	0.00365547	0.0176779	0.83618	-0.0309932	0.0383042	1.00366	0.969482	1.03905
ebi-a-GCST90001884	ieu-b-85.vcf	CD16-CD56 on Natural Killer	7	0.00470037	0.0198583	0.820767	-0.0342219	0.0436227	1.00471	0.966357	1.04459
ebi-a-GCST90001883	ieu-b-85.vcf	CD16-CD56 on Natural Killer T	5	-0.0116225	0.0183138	0.52567	-0.0475176	0.0242726	0.988445	0.953594	1.02457
ebi-a-GCST90001883	ieu-b-85.vcf	CD16-CD56 on Natural Killer T	5	0.0269641	0.0466098	0.603492	-0.0643911	0.118319	1.02733	0.937638	1.1256
ebi-a-GCST90001883	ieu-b-85.vcf	CD16-CD56 on Natural Killer T	5	-0.00335255	0.0224948	0.881525	-0.0474424	0.0407373	0.996653	0.953665	1.04158
ebi-a-GCST90001883	ieu-b-85.vcf	CD16-CD56 on Natural Killer T	5	-0.00900504	0.03021	0.780483	-0.0682166	0.0502065	0.991035	0.934058	1.05149
ebi-a-GCST90001870	ieu-b-85.vcf	CD34 on Hematopoietic Stem Cell	3	-0.00162559	0.0419849	0.969115	-0.0839159	0.0806648	0.998376	0.919509	1.08401
ebi-a-GCST90001870	ieu-b-85.vcf	CD34 on Hematopoietic Stem Cell	3	-0.228116	0.302013	0.588173	-0.820062	0.363829	0.796032	0.440404	1.43883
ebi-a-GCST90001870	ieu-b-85.vcf	CD34 on Hematopoietic Stem Cell	3	0.00231305	0.0266206	0.93076	-0.0498634	0.0544895	1.00232	0.951359	1.056
ebi-a-GCST90001870	ieu-b-85.vcf	CD34 on Hematopoietic Stem Cell	3	0.00409166	0.0346373	0.91676	-0.0637974	0.0719807	1.0041	0.938195	1.07463
ebi-a-GCST90001869	ieu-b-85.vcf	CD3 on resting CD4 regulatory T cell	5	-0.032704	0.0148769	0.027927	-0.0618627	-0.00354531	0.967825	0.940012	0.996461
ebi-a-GCST90001869	ieu-b-85.vcf	CD3 on resting CD4 regulatory T cell	5	-0.000167913	0.0236093	0.994772	-0.0464422	0.0461064	0.999832	0.95462	1.04719
ebi-a-GCST90001869	ieu-b-85.vcf	CD3 on resting CD4 regulatory T cell	5	-0.0255297	0.0177849	0.151155	-0.0603881	0.00932884	0.974793	0.941399	1.00937
ebi-a-GCST90001869	ieu-b-85.vcf	CD3 on resting CD4 regulatory T cell	5	-0.0187272	0.0188438	0.376565	-0.055661	0.0182066	0.981447	0.94586	1.01837
ebi-a-GCST90001868	ieu-b-85.vcf	CD3 on CD4 regulatory T cell	3	0.00617644	0.0159304	0.698228	-0.0250472	0.0374001	1.0062	0.975264	1.03811
ebi-a-GCST90001868	ieu-b-85.vcf	CD3 on CD4 regulatory T cell	3	0.0307075	0.0840573	0.777021	-0.134045	0.19546	1.03118	0.874551	1.21587
ebi-a-GCST90001868	ieu-b-85.vcf	CD3 on CD4 regulatory T cell	3	0.00796062	0.0126228	0.528266	-0.01678	0.0327012	1.00799	0.98336	1.03324
ebi-a-GCST90001868	ieu-b-85.vcf	CD3 on CD4 regulatory T cell	3	0.0168619	0.0131587	0.328539	-0.00892912	0.0426529	1.017	0.991111	1.04358
ebi-a-GCST90001867	ieu-b-85.vcf	CD3 on CD4+ T cell	2	-0.0529892	0.032526	0.103285	-0.11674	0.0107618	0.94839	0.889816	1.01082
ebi-a-GCST90001865	ieu-b-85.vcf	CD3 on CD28- CD8+ T cell	2	0.0278771	0.0330965	0.399621	-0.036992	0.0927462	1.02827	0.963684	1.09718
ebi-a-GCST90001864	ieu-b-85.vcf	CD3 on CD28+ CD45RA+ CD8+ T cell	3	-0.0214616	0.0212559	0.312651	-0.0631232	0.0202	0.978767	0.938828	1.02041
ebi-a-GCST90001864	ieu-b-85.vcf	CD3 on CD28+ CD45RA+ CD8+ T cell	3	-0.105426	0.0706806	0.375991	-0.24396	0.0331085	0.899941	0.783519	1.03366
ebi-a-GCST90001864	ieu-b-85.vcf	CD3 on CD28+ CD45RA+ CD8+ T cell	3	-0.0361025	0.0260504	0.165787	-0.0871613	0.0149563	0.964541	0.916529	1.01507
ebi-a-GCST90001864	ieu-b-85.vcf	CD3 on CD28+ CD45RA+ CD8+ T cell	3	-0.0399884	0.0330072	0.349418	-0.104683	0.0247056	0.960801	0.90061	1.02501
ebi-a-GCST90001863	ieu-b-85.vcf	CD3 on CD28+ CD45RA- CD8+ T cell	4	0.00254612	0.0324048	0.937373	-0.0609672	0.0660595	1.00255	0.940854	1.06829
ebi-a-GCST90001863	ieu-b-85.vcf	CD3 on CD28+ CD45RA- CD8+ T cell	4	0.143631	0.158738	0.461058	-0.167495	0.454757	1.15446	0.845781	1.57579
ebi-a-GCST90001863	ieu-b-85.vcf	CD3 on CD28+ CD45RA- CD8+ T cell	4	0.0139867	0.0205067	0.495204	-0.0262064	0.0541798	1.01408	0.974134	1.05567
ebi-a-GCST90001863	ieu-b-85.vcf	CD3 on CD28+ CD45RA- CD8+ T cell	4	0.0211452	0.0208854	0.385891	-0.0197902	0.0620806	1.02137	0.980404	1.06405
ebi-a-GCST90001861	ieu-b-85.vcf	CD3 on CD28+ CD4+ T cell	2	0.00757434	0.0261696	0.77225	-0.043718	0.0588667	1.0076	0.957224	1.06063
ebi-a-GCST90001860	ieu-b-85.vcf	CD3 on CD39+ CD4+ T cell	4	0.0112057	0.0117341	0.339592	-0.0117931	0.0342046	1.01127	0.988276	1.0348
ebi-a-GCST90001860	ieu-b-85.vcf	CD3 on CD39+ CD4+ T cell	4	0.0412704	0.0258359	0.251265	-0.00936799	0.0919088	1.04213	0.990676	1.09626
ebi-a-GCST90001860	ieu-b-85.vcf	CD3 on CD39+ CD4+ T cell	4	0.0121294	0.0125043	0.332034	-0.0123789	0.0366378	1.0122	0.987697	1.03732
ebi-a-GCST90001860	ieu-b-85.vcf	CD3 on CD39+ CD4+ T cell	4	0.017717	0.0123815	0.247835	-0.00655077	0.0419847	1.01787	0.993471	1.04288
ebi-a-GCST90001858	ieu-b-85.vcf	CD3 on CD45RA+ CD4+ T cell	5	0.00143717	0.0121586	0.905907	-0.0223936	0.025268	1.00144	0.977855	1.02559
ebi-a-GCST90001858	ieu-b-85.vcf	CD3 on CD45RA+ CD4+ T cell	5	0.0347791	0.0246872	0.253656	-0.0136079	0.083166	1.03539	0.986484	1.08672
ebi-a-GCST90001858	ieu-b-85.vcf	CD3 on CD45RA+ CD4+ T cell	5	0.00139405	0.0121502	0.908655	-0.0224203	0.0252084	1.0014	0.977829	1.02553
ebi-a-GCST90001858	ieu-b-85.vcf	CD3 on CD45RA+ CD4+ T cell	5	0.0176514	0.01168	0.205256	-0.00524152	0.0405443	1.01781	0.994772	1.04138
ebi-a-GCST90001857	ieu-b-85.vcf	CD3 on activated & secreting CD4 regulatory T cell	4	0.00479936	0.012792	0.707524	-0.0202731	0.0298718	1.00481	0.979931	1.03032
ebi-a-GCST90001857	ieu-b-85.vcf	CD3 on activated & secreting CD4 regulatory T cell	4	0.0561487	0.0363957	0.262857	-0.0151869	0.127484	1.05775	0.984928	1.13597
ebi-a-GCST90001857	ieu-b-85.vcf	CD3 on activated & secreting CD4 regulatory T cell	4	0.00674645	0.0123084	0.583611	-0.017378	0.0308709	1.00677	0.982772	1.03135
ebi-a-GCST90001857	ieu-b-85.vcf	CD3 on activated & secreting CD4 regulatory T cell	4	0.0180984	0.0138289	0.281851	-0.0090062	0.045203	1.01826	0.991034	1.04624
ebi-a-GCST90001856	ieu-b-85.vcf	CD3 on CD39+ secreting CD4 regulatory T cell	3	0.0173623	0.0143186	0.225295	-0.0107022	0.0454269	1.01751	0.989355	1.04647
ebi-a-GCST90001856	ieu-b-85.vcf	CD3 on CD39+ secreting CD4 regulatory T cell	3	0.0723145	0.0583873	0.432419	-0.0421246	0.186754	1.07499	0.95875	1.20533
ebi-a-GCST90001856	ieu-b-85.vcf	CD3 on CD39+ secreting CD4 regulatory T cell	3	0.0177588	0.0147699	0.229224	-0.0111903	0.0467079	1.01792	0.988872	1.04782
ebi-a-GCST90001856	ieu-b-85.vcf	CD3 on CD39+ secreting CD4 regulatory T cell	3	0.0201565	0.0157225	0.328369	-0.0106595	0.0509726	1.02036	0.989397	1.05229
ebi-a-GCST90001855	ieu-b-85.vcf	CD3 on secreting CD4 regulatory T cell	3	0.00581259	0.0162123	0.719946	-0.0259634	0.0375886	1.00583	0.974371	1.0383
ebi-a-GCST90001855	ieu-b-85.vcf	CD3 on secreting CD4 regulatory T cell	3	0.0237587	0.0860916	0.828579	-0.144981	0.192498	1.02404	0.865039	1.21227
ebi-a-GCST90001855	ieu-b-85.vcf	CD3 on secreting CD4 regulatory T cell	3	0.00731385	0.0127254	0.565463	-0.0176278	0.0322556	1.00734	0.982527	1.03278
ebi-a-GCST90001855	ieu-b-85.vcf	CD3 on secreting CD4 regulatory T cell	3	0.0177697	0.0132685	0.312403	-0.00823663	0.043776	1.01793	0.991797	1.04475
ebi-a-GCST90001854	ieu-b-85.vcf	CD3 on CD39+ activated CD4 regulatory T cell	4	0.00143156	0.0155584	0.926688	-0.0290628	0.0319259	1.00143	0.971355	1.03244
ebi-a-GCST90001854	ieu-b-85.vcf	CD3 on CD39+ activated CD4 regulatory T cell	4	0.0534003	0.0303041	0.220102	-0.00599564	0.112796	1.05485	0.994022	1.1194
ebi-a-GCST90001854	ieu-b-85.vcf	CD3 on CD39+ activated CD4 regulatory T cell	4	-0.0024264	0.0132124	0.854292	-0.0283227	0.0234699	0.997577	0.972075	1.02375
ebi-a-GCST90001854	ieu-b-85.vcf	CD3 on CD39+ activated CD4 regulatory T cell	4	0.0196606	0.0151019	0.283908	-0.00993912	0.0492603	1.01986	0.99011	1.05049
ebi-a-GCST90001853	ieu-b-85.vcf	CD3 on activated CD4 regulatory T cell	4	0.00452524	0.0130241	0.728252	-0.0210019	0.0300524	1.00454	0.979217	1.03051
ebi-a-GCST90001853	ieu-b-85.vcf	CD3 on activated CD4 regulatory T cell	4	0.0557405	0.0376942	0.277298	-0.0181402	0.129621	1.05732	0.982023	1.1384
ebi-a-GCST90001853	ieu-b-85.vcf	CD3 on activated CD4 regulatory T cell	4	0.00606735	0.0125637	0.629147	-0.0185575	0.0306922	1.00609	0.981614	1.03117
ebi-a-GCST90001853	ieu-b-85.vcf	CD3 on activated CD4 regulatory T cell	4	0.0184157	0.0131737	0.256569	-0.00740476	0.0442361	1.01859	0.992623	1.04523
ebi-a-GCST90001851	ieu-b-85.vcf	CD3 on T cell	3	0.000722264	0.0236506	0.975637	-0.0456329	0.0470774	1.00072	0.955393	1.0482
ebi-a-GCST90001851	ieu-b-85.vcf	CD3 on T cell	3	0.0890563	0.0827813	0.476763	-0.073195	0.251308	1.09314	0.92942	1.28571
ebi-a-GCST90001851	ieu-b-85.vcf	CD3 on T cell	3	-0.00121875	0.0171185	0.943243	-0.0347711	0.0323336	0.998782	0.965826	1.03286
ebi-a-GCST90001851	ieu-b-85.vcf	CD3 on T cell	3	0.0219406	0.0186717	0.36092	-0.0146559	0.0585371	1.02218	0.985451	1.06028
ebi-a-GCST90001849	ieu-b-85.vcf	CD3 on HLA DR+ CD4+ T cell	2	0.0226982	0.0182812	0.214378	-0.0131329	0.0585293	1.02296	0.986953	1.06028
ebi-a-GCST90001848	ieu-b-85.vcf	CD3 on Natural Killer T	2	-0.00617963	0.0874456	0.943662	-0.177573	0.165214	0.993839	0.8373	1.17965
ebi-a-GCST90001847	ieu-b-85.vcf	CD3 on HLA DR+ T cell	2	0.0187189	0.0194933	0.336917	-0.0194879	0.0569257	1.0189	0.980701	1.05858
ebi-a-GCST90001846	ieu-b-85.vcf	CD3 on Central Memory CD8+ T cell	2	0.0166982	0.0206038	0.417685	-0.0236852	0.0570816	1.01684	0.976593	1.05874
ebi-a-GCST90001845	ieu-b-85.vcf	CD3 on CD45RA- CD4+ T cell	3	0.00740238	0.0185796	0.690325	-0.0290136	0.0438184	1.00743	0.971403	1.04479
ebi-a-GCST90001845	ieu-b-85.vcf	CD3 on CD45RA- CD4+ T cell	3	0.0843958	0.0843009	0.499642	-0.080834	0.249625	1.08806	0.922347	1.28354
ebi-a-GCST90001845	ieu-b-85.vcf	CD3 on CD45RA- CD4+ T cell	3	0.00918513	0.015626	0.55666	-0.0214419	0.0398121	1.00923	0.978786	1.04062
ebi-a-GCST90001845	ieu-b-85.vcf	CD3 on CD45RA- CD4+ T cell	3	0.0199135	0.0151225	0.318545	-0.00972655	0.0495535	1.02011	0.990321	1.0508
ebi-a-GCST90001843	ieu-b-85.vcf	CD3 on Effector Memory CD4+ T cell	2	0.0105518	0.0236655	0.65569	-0.0358326	0.0569361	1.01061	0.964802	1.05859
ebi-a-GCST90001842	ieu-b-85.vcf	CD3 on Naive CD4+ T cell	4	0.00408525	0.0127573	0.748794	-0.020919	0.0290895	1.00409	0.979298	1.02952
ebi-a-GCST90001842	ieu-b-85.vcf	CD3 on Naive CD4+ T cell	4	0.0490104	0.0320855	0.266207	-0.0138771	0.111898	1.05023	0.986219	1.1184
ebi-a-GCST90001842	ieu-b-85.vcf	CD3 on Naive CD4+ T cell	4	0.00557748	0.0114624	0.626551	-0.0168889	0.0280439	1.00559	0.983253	1.02844
ebi-a-GCST90001842	ieu-b-85.vcf	CD3 on Naive CD4+ T cell	4	0.0164517	0.0120642	0.265976	-0.00719405	0.0400975	1.01659	0.992832	1.04091
ebi-a-GCST90001841	ieu-b-85.vcf	CD3 on Central Memory CD4+ T cell	4	0.00407451	0.0152369	0.789153	-0.0257898	0.0339388	1.00408	0.97454	1.03452
ebi-a-GCST90001841	ieu-b-85.vcf	CD3 on Central Memory CD4+ T cell	4	0.0570357	0.043221	0.317766	-0.0276775	0.141749	1.05869	0.972702	1.15229
ebi-a-GCST90001841	ieu-b-85.vcf	CD3 on Central Memory CD4+ T cell	4	0.00552656	0.0142932	0.69901	-0.0224881	0.0335412	1.00554	0.977763	1.03411
ebi-a-GCST90001841	ieu-b-85.vcf	CD3 on Central Memory CD4+ T cell	4	0.0194759	0.0152464	0.291349	-0.0104071	0.0493589	1.01967	0.989647	1.0506
ebi-a-GCST90001840	ieu-b-85.vcf	CD3 on Terminally Differentiated CD8+ T cell	2	0.0226282	0.0343676	0.51027	-0.0447322	0.0899887	1.02289	0.956254	1.09416
ebi-a-GCST90001839	ieu-b-85.vcf	CD3 on Effector Memory CD8+ T cell	3	0.0188719	0.0209207	0.367019	-0.0221326	0.0598764	1.01905	0.978111	1.06171
ebi-a-GCST90001839	ieu-b-85.vcf	CD3 on Effector Memory CD8+ T cell	3	-0.0167581	0.103003	0.897324	-0.218644	0.185128	0.983381	0.803608	1.20337
ebi-a-GCST90001839	ieu-b-85.vcf	CD3 on Effector Memory CD8+ T cell	3	0.0203632	0.0220752	0.356296	-0.0229042	0.0636305	1.02057	0.977356	1.0657
ebi-a-GCST90001839	ieu-b-85.vcf	CD3 on Effector Memory CD8+ T cell	3	0.0336117	0.0242787	0.300463	-0.0139745	0.0811979	1.03418	0.986123	1.08459
ebi-a-GCST90001838	ieu-b-85.vcf	CD3 on naive CD8+ T cell	6	0.00731659	0.0185692	0.693568	-0.029079	0.0437121	1.00734	0.97134	1.04468
ebi-a-GCST90001838	ieu-b-85.vcf	CD3 on naive CD8+ T cell	6	0.00289522	0.0449967	0.951784	-0.0852983	0.0910887	1.0029	0.918238	1.09537
ebi-a-GCST90001838	ieu-b-85.vcf	CD3 on naive CD8+ T cell	6	0.00669851	0.0123997	0.589047	-0.0176049	0.0310019	1.00672	0.982549	1.03149
ebi-a-GCST90001838	ieu-b-85.vcf	CD3 on naive CD8+ T cell	6	0.0133114	0.0125085	0.335915	-0.0112053	0.0378281	1.0134	0.988857	1.03855
ebi-a-GCST90001833	ieu-b-85.vcf	CD62L on CD62L+ Dendritic Cell	2	0.0382204	0.0327617	0.243364	-0.0259925	0.102433	1.03896	0.974342	1.10786
ebi-a-GCST90001832	ieu-b-85.vcf	CD62L on CD62L+ plasmacytoid Dendritic Cell	4	0.017617	0.0203648	0.387001	-0.022298	0.057532	1.01777	0.977949	1.05922
ebi-a-GCST90001832	ieu-b-85.vcf	CD62L on CD62L+ plasmacytoid Dendritic Cell	4	0.0819753	0.0789048	0.407961	-0.0726782	0.236629	1.08543	0.9299	1.26697
ebi-a-GCST90001832	ieu-b-85.vcf	CD62L on CD62L+ plasmacytoid Dendritic Cell	4	0.0271313	0.0240058	0.258392	-0.01992	0.0741826	1.0275	0.980277	1.077
ebi-a-GCST90001832	ieu-b-85.vcf	CD62L on CD62L+ plasmacytoid Dendritic Cell	4	0.032947	0.0260575	0.29539	-0.0181257	0.0840198	1.0335	0.982038	1.08765
ebi-a-GCST90001829	ieu-b-85.vcf	BAFF-R on B cell	9	-0.00118023	0.0107326	0.912436	-0.0222161	0.0198557	0.99882	0.978029	1.02005
ebi-a-GCST90001829	ieu-b-85.vcf	BAFF-R on B cell	9	-0.00707806	0.0161407	0.674224	-0.0387139	0.0245578	0.992947	0.962026	1.02486
ebi-a-GCST90001829	ieu-b-85.vcf	BAFF-R on B cell	9	-0.00101732	0.00937223	0.913563	-0.0193869	0.0173522	0.998983	0.9808	1.0175
ebi-a-GCST90001829	ieu-b-85.vcf	BAFF-R on B cell	9	-0.00109634	0.00969418	0.912743	-0.0200969	0.0179043	0.998904	0.980104	1.01807
ebi-a-GCST90001828	ieu-b-85.vcf	IgD on transitional B cell	5	0.0117329	0.0250109	0.63899	-0.0372885	0.0607543	1.0118	0.963398	1.06264
ebi-a-GCST90001828	ieu-b-85.vcf	IgD on transitional B cell	5	-0.0394322	0.054736	0.523333	-0.146715	0.0678503	0.961335	0.86354	1.07021
ebi-a-GCST90001828	ieu-b-85.vcf	IgD on transitional B cell	5	-0.00256887	0.0194085	0.894701	-0.0406094	0.0354717	0.997434	0.960204	1.03611
ebi-a-GCST90001828	ieu-b-85.vcf	IgD on transitional B cell	5	-0.00548643	0.0207202	0.804258	-0.0460979	0.0351251	0.994529	0.954948	1.03575
ebi-a-GCST90001827	ieu-b-85.vcf	IgD on IgD+ B cell	2	-0.0127717	0.0267202	0.632666	-0.0651433	0.0395999	0.98731	0.936933	1.04039
ebi-a-GCST90001826	ieu-b-85.vcf	IgD on unswitched memory B cell	4	0.0110411	0.0325686	0.734602	-0.0527933	0.0748755	1.0111	0.948576	1.07775
ebi-a-GCST90001826	ieu-b-85.vcf	IgD on unswitched memory B cell	4	-0.145441	0.160557	0.460627	-0.460134	0.169251	0.864641	0.631199	1.18442
ebi-a-GCST90001826	ieu-b-85.vcf	IgD on unswitched memory B cell	4	-0.00156074	0.0202918	0.938691	-0.0413326	0.0382111	0.99844	0.95951	1.03895
ebi-a-GCST90001826	ieu-b-85.vcf	IgD on unswitched memory B cell	4	-0.0023506	0.0189435	0.909095	-0.0394798	0.0347786	0.997652	0.961289	1.03539
ebi-a-GCST90001825	ieu-b-85.vcf	IgD on IgD+ CD38dim B cell	5	-0.00297317	0.0160861	0.853363	-0.0345019	0.0285556	0.997031	0.966086	1.02897
ebi-a-GCST90001825	ieu-b-85.vcf	IgD on IgD+ CD38dim B cell	5	-0.0126827	0.0340389	0.734217	-0.079399	0.0540336	0.987397	0.923671	1.05552
ebi-a-GCST90001825	ieu-b-85.vcf	IgD on IgD+ CD38dim B cell	5	-0.0020349	0.0174261	0.90704	-0.0361901	0.0321203	0.997967	0.964457	1.03264
ebi-a-GCST90001825	ieu-b-85.vcf	IgD on IgD+ CD38dim B cell	5	-0.000803721	0.020226	0.970207	-0.0404467	0.0388392	0.999197	0.96036	1.0396
ebi-a-GCST90001824	ieu-b-85.vcf	IgD on IgD+ CD38+ B cell	6	0.00165077	0.0199834	0.934164	-0.0375167	0.0408183	1.00165	0.963178	1.04166
ebi-a-GCST90001824	ieu-b-85.vcf	IgD on IgD+ CD38+ B cell	6	0.00198393	0.0431512	0.965533	-0.0825924	0.0865603	1.00199	0.920726	1.09042
ebi-a-GCST90001824	ieu-b-85.vcf	IgD on IgD+ CD38+ B cell	6	-0.00252876	0.0160244	0.874609	-0.0339366	0.0288791	0.997474	0.966633	1.0293
ebi-a-GCST90001824	ieu-b-85.vcf	IgD on IgD+ CD38+ B cell	6	-0.00514542	0.0168963	0.772992	-0.0382622	0.0279713	0.994868	0.962461	1.02837
ebi-a-GCST90001823	ieu-b-85.vcf	IgD on IgD+ CD38- unswitched memory B cell	3	0.0147628	0.0493302	0.764739	-0.0819245	0.11145	1.01487	0.921342	1.1179
ebi-a-GCST90001823	ieu-b-85.vcf	IgD on IgD+ CD38- unswitched memory B cell	3	-0.0202601	0.147813	0.913282	-0.309974	0.269454	0.979944	0.733466	1.30925
ebi-a-GCST90001823	ieu-b-85.vcf	IgD on IgD+ CD38- unswitched memory B cell	3	0.00699234	0.0179719	0.697223	-0.0282325	0.0422172	1.00702	0.972162	1.04312
ebi-a-GCST90001823	ieu-b-85.vcf	IgD on IgD+ CD38- unswitched memory B cell	3	-0.000496077	0.0192999	0.981828	-0.0383239	0.0373318	0.999504	0.962401	1.03804
ebi-a-GCST90001821	ieu-b-85.vcf	IgD on IgD+ CD24- B cell	5	-0.00290922	0.0158253	0.854145	-0.0339269	0.0281085	0.997095	0.966642	1.02851
ebi-a-GCST90001821	ieu-b-85.vcf	IgD on IgD+ CD24- B cell	5	-0.00950648	0.0321013	0.78644	-0.072425	0.053412	0.990539	0.930136	1.05486
ebi-a-GCST90001821	ieu-b-85.vcf	IgD on IgD+ CD24- B cell	5	-0.0017582	0.0173295	0.919188	-0.0357239	0.0322076	0.998243	0.964907	1.03273
ebi-a-GCST90001821	ieu-b-85.vcf	IgD on IgD+ CD24- B cell	5	-0.000491019	0.0189226	0.980541	-0.0375793	0.0365973	0.999509	0.963118	1.03728
ebi-a-GCST90001820	ieu-b-85.vcf	IgD on IgD+ CD24+ B cell	5	0.0198189	0.0254466	0.436073	-0.0300564	0.0696941	1.02002	0.970391	1.07218
ebi-a-GCST90001820	ieu-b-85.vcf	IgD on IgD+ CD24+ B cell	5	-0.0311677	0.0579896	0.628252	-0.144827	0.0824919	0.969313	0.865172	1.08599
ebi-a-GCST90001820	ieu-b-85.vcf	IgD on IgD+ CD24+ B cell	5	0.0103235	0.0183508	0.573733	-0.0256441	0.046291	1.01038	0.974682	1.04738
ebi-a-GCST90001820	ieu-b-85.vcf	IgD on IgD+ CD24+ B cell	5	0.00158442	0.0183804	0.935449	-0.0344411	0.03761	1.00159	0.966145	1.03833
ebi-a-GCST90001819	ieu-b-85.vcf	CD38 on transitional B cell	5	-0.0125762	0.0198833	0.527059	-0.0515474	0.026395	0.987503	0.949759	1.02675
ebi-a-GCST90001819	ieu-b-85.vcf	CD38 on transitional B cell	5	-0.0390375	0.0315985	0.3046	-0.100971	0.0228956	0.961715	0.90396	1.02316
ebi-a-GCST90001819	ieu-b-85.vcf	CD38 on transitional B cell	5	-0.0159243	0.0233839	0.495875	-0.0617567	0.0299081	0.984202	0.940112	1.03036
ebi-a-GCST90001819	ieu-b-85.vcf	CD38 on transitional B cell	5	-0.016021	0.0293165	0.613787	-0.0734814	0.0414394	0.984107	0.929153	1.04231
ebi-a-GCST90001816	ieu-b-85.vcf	CD38 on naive-mature B cell	3	-0.0278974	0.0270554	0.302484	-0.0809259	0.0251311	0.972488	0.922262	1.02545
ebi-a-GCST90001816	ieu-b-85.vcf	CD38 on naive-mature B cell	3	0.0210288	0.0854601	0.846402	-0.146473	0.188531	1.02125	0.863749	1.20747
ebi-a-GCST90001816	ieu-b-85.vcf	CD38 on naive-mature B cell	3	-0.0195915	0.0309696	0.526991	-0.0802919	0.0411088	0.980599	0.922847	1.04197
ebi-a-GCST90001816	ieu-b-85.vcf	CD38 on naive-mature B cell	3	-0.0186587	0.0352912	0.649818	-0.0878294	0.0505119	0.981514	0.915917	1.05181
ebi-a-GCST90001815	ieu-b-85.vcf	CD38 on IgD- CD38dim B cell	3	-0.0251921	0.0244548	0.30294	-0.0731236	0.0227394	0.975123	0.929486	1.023
ebi-a-GCST90001815	ieu-b-85.vcf	CD38 on IgD- CD38dim B cell	3	0.0199324	0.0780159	0.840756	-0.132979	0.172844	1.02013	0.875484	1.18868
ebi-a-GCST90001815	ieu-b-85.vcf	CD38 on IgD- CD38dim B cell	3	-0.0180552	0.027264	0.507821	-0.0714927	0.0353823	0.982107	0.931003	1.03602
ebi-a-GCST90001815	ieu-b-85.vcf	CD38 on IgD- CD38dim B cell	3	-0.0167071	0.0336379	0.668639	-0.0826374	0.0492232	0.983432	0.920685	1.05045
ebi-a-GCST90001813	ieu-b-85.vcf	CD38 on IgD+ CD38dim B cell	4	-0.0204291	0.0213753	0.339205	-0.0623246	0.0214664	0.979778	0.939578	1.0217
ebi-a-GCST90001813	ieu-b-85.vcf	CD38 on IgD+ CD38dim B cell	4	-0.00691853	0.0647983	0.924716	-0.133923	0.120086	0.993105	0.874657	1.12759
ebi-a-GCST90001813	ieu-b-85.vcf	CD38 on IgD+ CD38dim B cell	4	-0.0161948	0.0258053	0.530281	-0.0667733	0.0343836	0.983936	0.935407	1.03498
ebi-a-GCST90001813	ieu-b-85.vcf	CD38 on IgD+ CD38dim B cell	4	-0.0152604	0.0299042	0.645012	-0.0738725	0.0433518	0.984855	0.92879	1.04431
ebi-a-GCST90001812	ieu-b-85.vcf	CD38 on IgD+ CD38+ B cell	3	0.0237624	0.0295737	0.421688	-0.0342021	0.0817269	1.02405	0.966376	1.08516
ebi-a-GCST90001812	ieu-b-85.vcf	CD38 on IgD+ CD38+ B cell	3	0.0281708	0.0761104	0.774322	-0.121006	0.177347	1.02857	0.886029	1.19405
ebi-a-GCST90001812	ieu-b-85.vcf	CD38 on IgD+ CD38+ B cell	3	0.0284199	0.0355158	0.423592	-0.041191	0.0980309	1.02883	0.959646	1.103
ebi-a-GCST90001812	ieu-b-85.vcf	CD38 on IgD+ CD38+ B cell	3	0.0398497	0.0464761	0.481555	-0.0512434	0.130943	1.04065	0.950047	1.1399
ebi-a-GCST90001811	ieu-b-85.vcf	CD38 on IgD+ CD24- B cell	2	-0.0210626	0.0347022	0.543882	-0.0890788	0.0469537	0.979158	0.914773	1.04807
ebi-a-GCST90001808	ieu-b-85.vcf	CD27 on switched memory B cell	8	0.0126187	0.0115485	0.27454	-0.0100164	0.0352538	1.0127	0.990034	1.03588
ebi-a-GCST90001808	ieu-b-85.vcf	CD27 on switched memory B cell	8	0.00751076	0.0269901	0.79014	-0.0453898	0.0604114	1.00754	0.955625	1.06227
ebi-a-GCST90001808	ieu-b-85.vcf	CD27 on switched memory B cell	8	0.00394448	0.0138959	0.776519	-0.0232915	0.0311805	1.00395	0.976978	1.03167
ebi-a-GCST90001808	ieu-b-85.vcf	CD27 on switched memory B cell	8	0.00722752	0.0142457	0.627501	-0.0206941	0.0351491	1.00725	0.979519	1.03577
ebi-a-GCST90001806	ieu-b-85.vcf	CD27 on unswitched memory B cell	9	0.0186267	0.0139751	0.182581	-0.00876448	0.0460179	1.0188	0.991274	1.04709
ebi-a-GCST90001806	ieu-b-85.vcf	CD27 on unswitched memory B cell	9	0.00590537	0.0304929	0.851939	-0.0538607	0.0656714	1.00592	0.947564	1.06788
ebi-a-GCST90001806	ieu-b-85.vcf	CD27 on unswitched memory B cell	9	0.0189718	0.0174502	0.27695	-0.0152305	0.0531741	1.01915	0.984885	1.05461
ebi-a-GCST90001806	ieu-b-85.vcf	CD27 on unswitched memory B cell	9	0.0122037	0.0188908	0.536359	-0.0248223	0.0492297	1.01228	0.975483	1.05046
ebi-a-GCST90001805	ieu-b-85.vcf	CD27 on memory B cell	6	0.015572	0.0147699	0.291742	-0.0133769	0.0445209	1.01569	0.986712	1.04553
ebi-a-GCST90001805	ieu-b-85.vcf	CD27 on memory B cell	6	-0.00759976	0.0439638	0.871153	-0.0937689	0.0785694	0.992429	0.910493	1.08174
ebi-a-GCST90001805	ieu-b-85.vcf	CD27 on memory B cell	6	0.0116883	0.0168654	0.48829	-0.021368	0.0447445	1.01176	0.978859	1.04576
ebi-a-GCST90001805	ieu-b-85.vcf	CD27 on memory B cell	6	0.00247782	0.0178535	0.895036	-0.0325151	0.0374707	1.00248	0.968008	1.03818
ebi-a-GCST90001804	ieu-b-85.vcf	CD27 on IgD- CD38dim B cell	7	0.010284	0.0119627	0.389967	-0.0131628	0.0337308	1.01034	0.986923	1.03431
ebi-a-GCST90001804	ieu-b-85.vcf	CD27 on IgD- CD38dim B cell	7	-0.000496461	0.0220038	0.982872	-0.043624	0.042631	0.999504	0.957314	1.04355
ebi-a-GCST90001804	ieu-b-85.vcf	CD27 on IgD- CD38dim B cell	7	0.0027111	0.0134035	0.839707	-0.0235597	0.0289819	1.00271	0.976716	1.02941
ebi-a-GCST90001804	ieu-b-85.vcf	CD27 on IgD- CD38dim B cell	7	0.0024878	0.0134639	0.859493	-0.0239015	0.0288771	1.00249	0.976382	1.0293
ebi-a-GCST90001803	ieu-b-85.vcf	CD27 on IgD- CD38+ B cell	2	0.0269328	0.0407979	0.509157	-0.0530311	0.106897	1.0273	0.94835	1.11282
ebi-a-GCST90001802	ieu-b-85.vcf	CD27 on IgD- CD38- B cell	7	0.0186563	0.0140006	0.182682	-0.00878477	0.0460975	1.01883	0.991254	1.04718
ebi-a-GCST90001802	ieu-b-85.vcf	CD27 on IgD- CD38- B cell	7	0.003544	0.032501	0.917409	-0.0601579	0.0672459	1.00355	0.941616	1.06956
ebi-a-GCST90001802	ieu-b-85.vcf	CD27 on IgD- CD38- B cell	7	0.00533227	0.0164495	0.745818	-0.0269088	0.0375734	1.00535	0.97345	1.03829
ebi-a-GCST90001802	ieu-b-85.vcf	CD27 on IgD- CD38- B cell	7	0.0062342	0.0182747	0.744628	-0.0295842	0.0420526	1.00625	0.970849	1.04295
ebi-a-GCST90001801	ieu-b-85.vcf	CD27 on IgD+ CD38- unswitched memory B cell	5	0.0139123	0.0126764	0.272426	-0.0109335	0.0387581	1.01401	0.989126	1.03952
ebi-a-GCST90001801	ieu-b-85.vcf	CD27 on IgD+ CD38- unswitched memory B cell	5	0.00506241	0.0386142	0.903992	-0.0706215	0.0807463	1.00508	0.931815	1.0841
ebi-a-GCST90001801	ieu-b-85.vcf	CD27 on IgD+ CD38- unswitched memory B cell	5	0.0159629	0.0138714	0.249824	-0.0112251	0.0431509	1.01609	0.988838	1.0441
ebi-a-GCST90001801	ieu-b-85.vcf	CD27 on IgD+ CD38- unswitched memory B cell	5	0.00238474	0.0159149	0.88814	-0.0288085	0.033578	1.00239	0.971603	1.03415
ebi-a-GCST90001800	ieu-b-85.vcf	CD27 on IgD+ CD24+ B cell	6	0.01344	0.015009	0.370542	-0.0159777	0.0428576	1.01353	0.984149	1.04379
ebi-a-GCST90001800	ieu-b-85.vcf	CD27 on IgD+ CD24+ B cell	6	-0.0149228	0.0379813	0.714435	-0.0893662	0.0595207	0.985188	0.914511	1.06133
ebi-a-GCST90001800	ieu-b-85.vcf	CD27 on IgD+ CD24+ B cell	6	0.0096359	0.0177583	0.587395	-0.0251703	0.0444421	1.00968	0.975144	1.04544
ebi-a-GCST90001800	ieu-b-85.vcf	CD27 on IgD+ CD24+ B cell	6	0.0033713	0.0182349	0.860587	-0.0323691	0.0391117	1.00338	0.968149	1.03989
ebi-a-GCST90001798	ieu-b-85.vcf	CD27 on CD24+ CD27+ B cell	8	0.0145878	0.0121918	0.231491	-0.00930809	0.0384836	1.01469	0.990735	1.03923
ebi-a-GCST90001798	ieu-b-85.vcf	CD27 on CD24+ CD27+ B cell	8	0.00198988	0.0244297	0.937731	-0.0458923	0.0498721	1.00199	0.955145	1.05114
ebi-a-GCST90001798	ieu-b-85.vcf	CD27 on CD24+ CD27+ B cell	8	0.00372178	0.0139426	0.789518	-0.0236056	0.0310492	1.00373	0.976671	1.03154
ebi-a-GCST90001798	ieu-b-85.vcf	CD27 on CD24+ CD27+ B cell	8	0.00330842	0.0151136	0.832971	-0.0263143	0.0329311	1.00331	0.974029	1.03348
ebi-a-GCST90001795	ieu-b-85.vcf	CD25 on transitional B cell	2	-0.00624816	0.0409452	0.878715	-0.0865008	0.0740044	0.993771	0.917135	1.07681
ebi-a-GCST90001794	ieu-b-85.vcf	CD25 on IgD+ B cell	2	0.0179465	0.0358026	0.616187	-0.0522266	0.0881195	1.01811	0.949114	1.09212
ebi-a-GCST90001793	ieu-b-85.vcf	CD25 on switched memory B cell	3	-0.0254631	0.0204999	0.214196	-0.0656429	0.0147167	0.974858	0.936465	1.01483
ebi-a-GCST90001793	ieu-b-85.vcf	CD25 on switched memory B cell	3	0.00971861	0.0766801	0.919741	-0.140574	0.160012	1.00977	0.868859	1.17352
ebi-a-GCST90001793	ieu-b-85.vcf	CD25 on switched memory B cell	3	-0.00950444	0.0246587	0.699911	-0.0578354	0.0388265	0.990541	0.943805	1.03959
ebi-a-GCST90001793	ieu-b-85.vcf	CD25 on switched memory B cell	3	-0.00884727	0.0274515	0.777805	-0.0626521	0.0449576	0.991192	0.93927	1.04598
ebi-a-GCST90001792	ieu-b-85.vcf	CD25 on unswitched memory B cell	4	0.00177477	0.024005	0.941063	-0.045275	0.0488245	1.00178	0.955735	1.05004
ebi-a-GCST90001792	ieu-b-85.vcf	CD25 on unswitched memory B cell	4	0.0604498	0.059967	0.419563	-0.0570856	0.177985	1.06231	0.944513	1.19481
ebi-a-GCST90001792	ieu-b-85.vcf	CD25 on unswitched memory B cell	4	0.0130417	0.0213842	0.541946	-0.0288714	0.0549548	1.01313	0.971541	1.05649
ebi-a-GCST90001792	ieu-b-85.vcf	CD25 on unswitched memory B cell	4	0.0253732	0.0230793	0.35191	-0.0198623	0.0706088	1.0257	0.980334	1.07316
ebi-a-GCST90001791	ieu-b-85.vcf	CD25 on naive-mature B cell	4	0.0119929	0.0222924	0.59059	-0.0317002	0.055686	1.01207	0.968797	1.05727
ebi-a-GCST90001791	ieu-b-85.vcf	CD25 on naive-mature B cell	4	0.0173906	0.051163	0.766306	-0.082889	0.11767	1.01754	0.920453	1.12487
ebi-a-GCST90001791	ieu-b-85.vcf	CD25 on naive-mature B cell	4	-0.00846672	0.0262019	0.746594	-0.0598224	0.042889	0.991569	0.941932	1.04382
ebi-a-GCST90001791	ieu-b-85.vcf	CD25 on naive-mature B cell	4	-0.00822862	0.0312344	0.809264	-0.069448	0.0529907	0.991805	0.932909	1.05442
ebi-a-GCST90001790	ieu-b-85.vcf	CD25 on memory B cell	4	0.00201832	0.0230862	0.930333	-0.0432306	0.0472673	1.00202	0.957691	1.0484
ebi-a-GCST90001790	ieu-b-85.vcf	CD25 on memory B cell	4	0.0612619	0.0568084	0.393637	-0.0500825	0.172606	1.06318	0.951151	1.1884
ebi-a-GCST90001790	ieu-b-85.vcf	CD25 on memory B cell	4	0.0129024	0.0211428	0.541698	-0.0285376	0.0543423	1.01299	0.971866	1.05585
ebi-a-GCST90001790	ieu-b-85.vcf	CD25 on memory B cell	4	0.024007	0.0231149	0.375349	-0.0212981	0.0693122	1.0243	0.978927	1.07177
ebi-a-GCST90001789	ieu-b-85.vcf	CD25 on IgD- CD38dim B cell	3	0.0076602	0.0226056	0.734713	-0.0366468	0.0519672	1.00769	0.964017	1.05334
ebi-a-GCST90001789	ieu-b-85.vcf	CD25 on IgD- CD38dim B cell	3	-0.0154502	0.0519166	0.815857	-0.117207	0.0863063	0.984669	0.889401	1.09014
ebi-a-GCST90001789	ieu-b-85.vcf	CD25 on IgD- CD38dim B cell	3	-0.00945712	0.0260187	0.716251	-0.0604538	0.0415395	0.990587	0.941337	1.04241
ebi-a-GCST90001789	ieu-b-85.vcf	CD25 on IgD- CD38dim B cell	3	-0.00957191	0.0327146	0.797399	-0.0736926	0.0545487	0.990474	0.928957	1.05606
ebi-a-GCST90001787	ieu-b-85.vcf	CD25 on IgD- CD38- B cell	3	0.0450363	0.0287613	0.117381	-0.0113359	0.101408	1.04607	0.988728	1.10673
ebi-a-GCST90001787	ieu-b-85.vcf	CD25 on IgD- CD38- B cell	3	0.0529673	0.147047	0.779896	-0.235245	0.341179	1.0544	0.790377	1.40661
ebi-a-GCST90001787	ieu-b-85.vcf	CD25 on IgD- CD38- B cell	3	0.0458943	0.0251599	0.0681365	-0.00341915	0.0952077	1.04696	0.996587	1.09989
ebi-a-GCST90001787	ieu-b-85.vcf	CD25 on IgD- CD38- B cell	3	0.0661796	0.0266359	0.13092	0.0139733	0.118386	1.06842	1.01407	1.12568
ebi-a-GCST90001786	ieu-b-85.vcf	CD25 on IgD- CD27- B cell	2	-0.0091911	0.0330654	0.781038	-0.0739993	0.0556171	0.990851	0.928672	1.05719
ebi-a-GCST90001785	ieu-b-85.vcf	CD25 on IgD- CD24- B cell	2	0.00992908	0.0483599	0.837325	-0.0848562	0.104714	1.00998	0.918644	1.11039
ebi-a-GCST90001784	ieu-b-85.vcf	CD25 on IgD+ CD38dim B cell	3	-0.0136249	0.0350309	0.697321	-0.0822854	0.0550356	0.986468	0.921009	1.05658
ebi-a-GCST90001784	ieu-b-85.vcf	CD25 on IgD+ CD38dim B cell	3	-0.0666591	0.0475579	0.39451	-0.159873	0.0265543	0.935514	0.852252	1.02691
ebi-a-GCST90001784	ieu-b-85.vcf	CD25 on IgD+ CD38dim B cell	3	-0.00835902	0.0311226	0.78825	-0.0693593	0.0526413	0.991676	0.932991	1.05405
ebi-a-GCST90001784	ieu-b-85.vcf	CD25 on IgD+ CD38dim B cell	3	-0.00431319	0.0365676	0.916885	-0.0759857	0.0673593	0.995696	0.926829	1.06968
ebi-a-GCST90001783	ieu-b-85.vcf	CD25 on IgD+ CD38+ B cell	3	-0.00656211	0.0303701	0.828932	-0.0660875	0.0529633	0.993459	0.936049	1.05439
ebi-a-GCST90001783	ieu-b-85.vcf	CD25 on IgD+ CD38+ B cell	3	-0.00744442	0.122254	0.961282	-0.247062	0.232173	0.992583	0.781093	1.26134
ebi-a-GCST90001783	ieu-b-85.vcf	CD25 on IgD+ CD38+ B cell	3	-0.00836518	0.0344	0.807871	-0.0757892	0.0590588	0.99167	0.927012	1.06084
ebi-a-GCST90001783	ieu-b-85.vcf	CD25 on IgD+ CD38+ B cell	3	-0.00930269	0.0412788	0.84263	-0.0902091	0.0716037	0.99074	0.91374	1.07423
ebi-a-GCST90001781	ieu-b-85.vcf	CD25 on IgD+ CD38- naive B cell	3	-0.00875162	0.0252242	0.728627	-0.0581911	0.0406879	0.991287	0.94347	1.04153
ebi-a-GCST90001781	ieu-b-85.vcf	CD25 on IgD+ CD38- naive B cell	3	-0.0133013	0.076483	0.890381	-0.163208	0.136605	0.986787	0.849415	1.14638
ebi-a-GCST90001781	ieu-b-85.vcf	CD25 on IgD+ CD38- naive B cell	3	-0.0110324	0.0288201	0.701867	-0.0675199	0.0454551	0.989028	0.934709	1.0465
ebi-a-GCST90001781	ieu-b-85.vcf	CD25 on IgD+ CD38- naive B cell	3	-0.0111286	0.0336515	0.772301	-0.0770856	0.0548284	0.988933	0.925811	1.05636
ebi-a-GCST90001780	ieu-b-85.vcf	CD25 on IgD+ CD38- B cell	2	-0.0125134	0.0347939	0.719115	-0.0807094	0.0556827	0.987565	0.922462	1.05726
ebi-a-GCST90001779	ieu-b-85.vcf	CD25 on IgD+ CD24- B cell	4	0.00461596	0.0228881	0.840171	-0.0402447	0.0494766	1.00463	0.960554	1.05072
ebi-a-GCST90001779	ieu-b-85.vcf	CD25 on IgD+ CD24- B cell	4	-0.0205735	0.0466999	0.702583	-0.112105	0.0709583	0.979637	0.89395	1.07354
ebi-a-GCST90001779	ieu-b-85.vcf	CD25 on IgD+ CD24- B cell	4	-0.00532211	0.0271925	0.84483	-0.0586194	0.0479752	0.994692	0.943066	1.04914
ebi-a-GCST90001779	ieu-b-85.vcf	CD25 on IgD+ CD24- B cell	4	-0.00602604	0.0304433	0.855743	-0.0656949	0.0536429	0.993992	0.936416	1.05511
ebi-a-GCST90001778	ieu-b-85.vcf	CD25 on IgD+ CD24+ B cell	3	0.00420201	0.0318569	0.895061	-0.0582375	0.0666415	1.00421	0.943426	1.06891
ebi-a-GCST90001778	ieu-b-85.vcf	CD25 on IgD+ CD24+ B cell	3	0.0724098	0.0828482	0.542737	-0.0899726	0.234792	1.0751	0.913956	1.26465
ebi-a-GCST90001778	ieu-b-85.vcf	CD25 on IgD+ CD24+ B cell	3	0.0183348	0.0239094	0.443176	-0.0285278	0.0651973	1.0185	0.971875	1.06737
ebi-a-GCST90001778	ieu-b-85.vcf	CD25 on IgD+ CD24+ B cell	3	0.0255543	0.0239894	0.398348	-0.0214649	0.0725736	1.02588	0.978764	1.07527
ebi-a-GCST90001777	ieu-b-85.vcf	CD25 on CD24+ CD27+ B cell	4	0.00129504	0.0227728	0.954651	-0.0433397	0.0459298	1.0013	0.957586	1.047
ebi-a-GCST90001777	ieu-b-85.vcf	CD25 on CD24+ CD27+ B cell	4	0.0555135	0.0582692	0.441287	-0.0586941	0.169721	1.05708	0.942995	1.18497
ebi-a-GCST90001777	ieu-b-85.vcf	CD25 on CD24+ CD27+ B cell	4	0.0123353	0.0207973	0.553101	-0.0284274	0.053098	1.01241	0.971973	1.05453
ebi-a-GCST90001777	ieu-b-85.vcf	CD25 on CD24+ CD27+ B cell	4	0.0242245	0.022024	0.351717	-0.0189427	0.0673916	1.02452	0.981236	1.06971
ebi-a-GCST90001775	ieu-b-85.vcf	CD25 on B cell	3	0.0136021	0.0257542	0.597394	-0.0368762	0.0640804	1.0137	0.963795	1.06618
ebi-a-GCST90001775	ieu-b-85.vcf	CD25 on B cell	3	0.0291712	0.0677713	0.741236	-0.103661	0.162003	1.0296	0.901531	1.17586
ebi-a-GCST90001775	ieu-b-85.vcf	CD25 on B cell	3	-0.00992774	0.0311346	0.749829	-0.0709515	0.051096	0.990121	0.931507	1.05242
ebi-a-GCST90001775	ieu-b-85.vcf	CD25 on B cell	3	-0.0109205	0.0391645	0.806558	-0.0876829	0.065842	0.989139	0.916051	1.06806
ebi-a-GCST90001768	ieu-b-85.vcf	CD24 on IgD+ CD38+ B cell	2	-0.0222198	0.04094	0.587308	-0.102462	0.0580225	0.978025	0.902612	1.05974
ebi-a-GCST90001763	ieu-b-85.vcf	CD20 on transitional B cell	2	-0.0219376	0.0283592	0.439189	-0.0775216	0.0336463	0.978301	0.925407	1.03422
ebi-a-GCST90001762	ieu-b-85.vcf	CD20 on IgD+ B cell	2	0.00888701	0.0368644	0.809499	-0.0633673	0.0811413	1.00893	0.938599	1.08452
ebi-a-GCST90001761	ieu-b-85.vcf	CD20 on switched memory B cell	6	-0.0297352	0.021103	0.15882	-0.0710972	0.0116267	0.970702	0.931371	1.01169
ebi-a-GCST90001761	ieu-b-85.vcf	CD20 on switched memory B cell	6	0.105413	0.0949628	0.329214	-0.0807143	0.29154	1.11117	0.922457	1.33849
ebi-a-GCST90001761	ieu-b-85.vcf	CD20 on switched memory B cell	6	-0.0226183	0.0242975	0.351911	-0.0702415	0.0250049	0.977636	0.932169	1.02532
ebi-a-GCST90001761	ieu-b-85.vcf	CD20 on switched memory B cell	6	-0.0199364	0.0261916	0.480891	-0.071272	0.0313992	0.980261	0.931209	1.0319
ebi-a-GCST90001760	ieu-b-85.vcf	CD20 on unswitched memory B cell	4	-0.024884	0.0275529	0.366455	-0.0788877	0.0291197	0.975423	0.924144	1.02955
ebi-a-GCST90001760	ieu-b-85.vcf	CD20 on unswitched memory B cell	4	0.950561	0.703621	0.30925	-0.428537	2.32966	2.58716	0.651462	10.2744
ebi-a-GCST90001760	ieu-b-85.vcf	CD20 on unswitched memory B cell	4	-0.027735	0.03488	0.426524	-0.0960998	0.0406298	0.972646	0.908373	1.04147
ebi-a-GCST90001760	ieu-b-85.vcf	CD20 on unswitched memory B cell	4	-0.0312876	0.0381799	0.472557	-0.10612	0.0435451	0.969197	0.899316	1.04451
ebi-a-GCST90001759	ieu-b-85.vcf	CD20 on naive-mature B cell	4	-0.0133088	0.0252035	0.597463	-0.0627076	0.0360901	0.986779	0.939218	1.03675
ebi-a-GCST90001759	ieu-b-85.vcf	CD20 on naive-mature B cell	4	-0.036202	0.135946	0.814952	-0.302657	0.230253	0.964445	0.738853	1.25892
ebi-a-GCST90001759	ieu-b-85.vcf	CD20 on naive-mature B cell	4	-0.0224506	0.0293838	0.44484	-0.0800429	0.0351417	0.9778	0.923077	1.03577
ebi-a-GCST90001759	ieu-b-85.vcf	CD20 on naive-mature B cell	4	-0.0293241	0.0366389	0.482023	-0.101136	0.0424882	0.971102	0.90381	1.0434
ebi-a-GCST90001758	ieu-b-85.vcf	CD20 on memory B cell	4	0.0491378	0.0827758	0.552763	-0.113103	0.211378	1.05037	0.893059	1.23538
ebi-a-GCST90001758	ieu-b-85.vcf	CD20 on memory B cell	4	0.933142	0.802513	0.364902	-0.639782	2.50607	2.54249	0.527407	12.2566
ebi-a-GCST90001758	ieu-b-85.vcf	CD20 on memory B cell	4	0.0267783	0.0449515	0.551366	-0.0613267	0.114883	1.02714	0.940516	1.12174
ebi-a-GCST90001758	ieu-b-85.vcf	CD20 on memory B cell	4	0.0266371	0.0508552	0.636661	-0.0730392	0.126313	1.027	0.929564	1.13464
ebi-a-GCST90001757	ieu-b-85.vcf	CD20 on IgD- CD38dim B cell	6	-0.0285551	0.021247	0.178961	-0.0701992	0.013089	0.971849	0.932208	1.01318
ebi-a-GCST90001757	ieu-b-85.vcf	CD20 on IgD- CD38dim B cell	6	0.060166	0.0940262	0.557059	-0.124125	0.244457	1.06201	0.883269	1.27693
ebi-a-GCST90001757	ieu-b-85.vcf	CD20 on IgD- CD38dim B cell	6	-0.0247184	0.025554	0.333394	-0.0748042	0.0253675	0.975585	0.927925	1.02569
ebi-a-GCST90001757	ieu-b-85.vcf	CD20 on IgD- CD38dim B cell	6	-0.0249209	0.0285807	0.423121	-0.080939	0.0310972	0.975387	0.92225	1.03159
ebi-a-GCST90001755	ieu-b-85.vcf	CD20 on IgD- CD38- B cell	4	-0.0294569	0.0351041	0.401397	-0.098261	0.0393472	0.970973	0.906412	1.04013
ebi-a-GCST90001755	ieu-b-85.vcf	CD20 on IgD- CD38- B cell	4	0.836048	0.440435	0.198086	-0.0272049	1.6993	2.30723	0.973162	5.47012
ebi-a-GCST90001755	ieu-b-85.vcf	CD20 on IgD- CD38- B cell	4	-0.0179354	0.034602	0.604225	-0.0857554	0.0498846	0.982224	0.917819	1.05115
ebi-a-GCST90001755	ieu-b-85.vcf	CD20 on IgD- CD38- B cell	4	-0.0132397	0.0367317	0.742399	-0.0852338	0.0587544	0.986848	0.918298	1.06051
ebi-a-GCST90001754	ieu-b-85.vcf	CD20 on IgD- CD27- B cell	3	-0.0231365	0.0343627	0.500755	-0.0904874	0.0442144	0.977129	0.913486	1.04521
ebi-a-GCST90001754	ieu-b-85.vcf	CD20 on IgD- CD27- B cell	3	-0.531854	0.474634	0.463846	-1.46214	0.398429	0.587515	0.231741	1.48948
ebi-a-GCST90001754	ieu-b-85.vcf	CD20 on IgD- CD27- B cell	3	-0.014107	0.0385902	0.714694	-0.0897437	0.0615297	0.985992	0.914165	1.06346
ebi-a-GCST90001754	ieu-b-85.vcf	CD20 on IgD- CD27- B cell	3	-0.00914499	0.0389067	0.836044	-0.0854021	0.0671121	0.990897	0.918143	1.06942
ebi-a-GCST90001752	ieu-b-85.vcf	CD20 on IgD+ CD38dim B cell	5	0.00220976	0.0245028	0.928141	-0.0458158	0.0502353	1.00221	0.955218	1.05152
ebi-a-GCST90001752	ieu-b-85.vcf	CD20 on IgD+ CD38dim B cell	5	-0.127755	0.138378	0.42398	-0.398975	0.143466	0.880069	0.671007	1.15427
ebi-a-GCST90001752	ieu-b-85.vcf	CD20 on IgD+ CD38dim B cell	5	0.0253023	0.0305335	0.407289	-0.0345433	0.0851479	1.02563	0.966046	1.08888
ebi-a-GCST90001752	ieu-b-85.vcf	CD20 on IgD+ CD38dim B cell	5	0.0370976	0.0449074	0.455177	-0.0509209	0.125116	1.03779	0.950354	1.13328
ebi-a-GCST90001751	ieu-b-85.vcf	CD20 on IgD+ CD38+ B cell	5	-0.00344996	0.0241599	0.886451	-0.0508034	0.0439035	0.996556	0.950466	1.04488
ebi-a-GCST90001751	ieu-b-85.vcf	CD20 on IgD+ CD38+ B cell	5	-0.080696	0.0805815	0.390415	-0.238636	0.0772438	0.922474	0.787702	1.08031
ebi-a-GCST90001751	ieu-b-85.vcf	CD20 on IgD+ CD38+ B cell	5	-0.0297433	0.0267677	0.266498	-0.082208	0.0227215	0.970695	0.92108	1.02298
ebi-a-GCST90001751	ieu-b-85.vcf	CD20 on IgD+ CD38+ B cell	5	-0.0323414	0.0293107	0.33177	-0.0897905	0.0251076	0.968176	0.914123	1.02543
ebi-a-GCST90001748	ieu-b-85.vcf	CD20 on IgD+ CD38- B cell	3	0.0227141	0.0439028	0.604896	-0.0633353	0.108763	1.02297	0.938629	1.1149
ebi-a-GCST90001748	ieu-b-85.vcf	CD20 on IgD+ CD38- B cell	3	0.0439617	0.327305	0.915002	-0.597556	0.68548	1.04494	0.550154	1.98472
ebi-a-GCST90001748	ieu-b-85.vcf	CD20 on IgD+ CD38- B cell	3	0.0416993	0.046349	0.36829	-0.0491448	0.132543	1.04258	0.952043	1.14173
ebi-a-GCST90001748	ieu-b-85.vcf	CD20 on IgD+ CD38- B cell	3	0.0723228	0.0674285	0.395709	-0.059837	0.204483	1.075	0.941918	1.22689
ebi-a-GCST90001747	ieu-b-85.vcf	CD20 on IgD+ CD24- B cell	2	-0.0080554	0.0404949	0.842322	-0.0874254	0.0713146	0.991977	0.916287	1.07392
ebi-a-GCST90001746	ieu-b-85.vcf	CD20 on IgD+ CD24+ B cell	2	-0.0304142	0.0371275	0.412682	-0.103184	0.0423557	0.970044	0.901961	1.04327
ebi-a-GCST90001745	ieu-b-85.vcf	CD20 on CD24+ CD27+ B cell	7	0.0191475	0.0488809	0.695266	-0.0766589	0.114954	1.01933	0.926206	1.12182
ebi-a-GCST90001745	ieu-b-85.vcf	CD20 on CD24+ CD27+ B cell	7	0.271255	0.25935	0.34351	-0.237071	0.779581	1.31161	0.788936	2.18056
ebi-a-GCST90001745	ieu-b-85.vcf	CD20 on CD24+ CD27+ B cell	7	-0.0136828	0.0288859	0.635725	-0.0702992	0.0429336	0.98641	0.932115	1.04387
ebi-a-GCST90001745	ieu-b-85.vcf	CD20 on CD24+ CD27+ B cell	7	-0.0215795	0.026744	0.450523	-0.0739978	0.0308389	0.978652	0.928674	1.03132
ebi-a-GCST90001743	ieu-b-85.vcf	CD20 on B cell	4	0.00553367	0.0357294	0.876918	-0.0644959	0.0755633	1.00555	0.93754	1.07849
ebi-a-GCST90001743	ieu-b-85.vcf	CD20 on B cell	4	-0.356114	0.641928	0.634819	-1.61429	0.902064	0.700393	0.199031	2.46468
ebi-a-GCST90001743	ieu-b-85.vcf	CD20 on B cell	4	-0.0262275	0.0286839	0.360527	-0.082448	0.029993	0.974113	0.920859	1.03045
ebi-a-GCST90001743	ieu-b-85.vcf	CD20 on B cell	4	-0.0344583	0.0366974	0.417009	-0.106385	0.0374686	0.966129	0.899078	1.03818
ebi-a-GCST90001742	ieu-b-85.vcf	CD19 on transitional B cell	4	-0.00416648	0.0205785	0.839551	-0.0445003	0.0361674	0.995842	0.956475	1.03683
ebi-a-GCST90001742	ieu-b-85.vcf	CD19 on transitional B cell	4	0.0758527	0.0498355	0.267415	-0.0218248	0.17353	1.0788	0.978412	1.1895
ebi-a-GCST90001742	ieu-b-85.vcf	CD19 on transitional B cell	4	0.00231319	0.0200746	0.908263	-0.0370331	0.0416594	1.00232	0.963644	1.04254
ebi-a-GCST90001742	ieu-b-85.vcf	CD19 on transitional B cell	4	0.00740692	0.0197518	0.732602	-0.0313066	0.0461204	1.00743	0.969178	1.0472
ebi-a-GCST90001741	ieu-b-85.vcf	CD19 on IgD+ B cell	2	-0.0540835	0.0582668	0.353302	-0.168287	0.0601195	0.947353	0.845112	1.06196
ebi-a-GCST90001740	ieu-b-85.vcf	CD19 on switched memory B cell	2	0.00540685	0.0441024	0.902426	-0.0810339	0.0918476	1.00542	0.922162	1.0962
ebi-a-GCST90001738	ieu-b-85.vcf	CD19 on unswitched memory B cell	4	-0.00356424	0.0209959	0.8652	-0.0447161	0.0375877	0.996442	0.956269	1.0383
ebi-a-GCST90001738	ieu-b-85.vcf	CD19 on unswitched memory B cell	4	0.0769485	0.0492808	0.258816	-0.0196418	0.173539	1.07999	0.98055	1.18951
ebi-a-GCST90001738	ieu-b-85.vcf	CD19 on unswitched memory B cell	4	0.00308086	0.0215893	0.886525	-0.0392342	0.0453959	1.00309	0.961525	1.04644
ebi-a-GCST90001738	ieu-b-85.vcf	CD19 on unswitched memory B cell	4	0.00737226	0.0210043	0.748799	-0.0337962	0.0485407	1.0074	0.966769	1.04974
ebi-a-GCST90001737	ieu-b-85.vcf	CD19 on naive-mature B cell	2	0.0687731	0.0942896	0.465768	-0.116034	0.253581	1.07119	0.890445	1.28863
ebi-a-GCST90001736	ieu-b-85.vcf	CD19 on memory B cell	2	0.00824152	0.0201275	0.682198	-0.0312084	0.0476914	1.00828	0.969274	1.04885
ebi-a-GCST90001735	ieu-b-85.vcf	CD19 on IgD- CD38dim B cell	2	0.00718586	0.0170861	0.674071	-0.0263029	0.0406746	1.00721	0.97404	1.04151
ebi-a-GCST90001730	ieu-b-85.vcf	CD19 on IgD+ CD38dim B cell	4	-0.0038621	0.0213799	0.856649	-0.0457667	0.0380425	0.996145	0.955265	1.03878
ebi-a-GCST90001730	ieu-b-85.vcf	CD19 on IgD+ CD38dim B cell	4	0.0795748	0.0531903	0.273299	-0.0246782	0.183828	1.08283	0.975624	1.20181
ebi-a-GCST90001730	ieu-b-85.vcf	CD19 on IgD+ CD38dim B cell	4	0.00423837	0.0206758	0.837578	-0.0362861	0.0447629	1.00425	0.964364	1.04578
ebi-a-GCST90001730	ieu-b-85.vcf	CD19 on IgD+ CD38dim B cell	4	0.00800013	0.0205693	0.723287	-0.0323158	0.048316	1.00803	0.968201	1.0495
ebi-a-GCST90001729	ieu-b-85.vcf	CD19 on IgD+ CD38+ B cell	4	-0.0036618	0.0182442	0.840925	-0.0394204	0.0320968	0.996345	0.961346	1.03262
ebi-a-GCST90001729	ieu-b-85.vcf	CD19 on IgD+ CD38+ B cell	4	0.0688846	0.0465573	0.277108	-0.0223677	0.160137	1.07131	0.977881	1.17367
ebi-a-GCST90001729	ieu-b-85.vcf	CD19 on IgD+ CD38+ B cell	4	0.00331515	0.0177678	0.851988	-0.0315097	0.03814	1.00332	0.968982	1.03888
ebi-a-GCST90001729	ieu-b-85.vcf	CD19 on IgD+ CD38+ B cell	4	0.00681012	0.017789	0.727362	-0.0280563	0.0416766	1.00683	0.972334	1.04256
ebi-a-GCST90001728	ieu-b-85.vcf	CD19 on IgD+ CD38- unswitched memory B cell	3	-0.0563752	0.0351871	0.109121	-0.125342	0.0125915	0.945184	0.882195	1.01267
ebi-a-GCST90001728	ieu-b-85.vcf	CD19 on IgD+ CD38- unswitched memory B cell	3	0.44288	0.523828	0.553184	-0.583823	1.46958	1.55719	0.557762	4.34742
ebi-a-GCST90001728	ieu-b-85.vcf	CD19 on IgD+ CD38- unswitched memory B cell	3	-0.0506917	0.041665	0.223738	-0.132355	0.0309718	0.950572	0.87603	1.03146
ebi-a-GCST90001728	ieu-b-85.vcf	CD19 on IgD+ CD38- unswitched memory B cell	3	-0.0429292	0.0487234	0.471212	-0.138427	0.0525687	0.957979	0.870727	1.05397
ebi-a-GCST90001725	ieu-b-85.vcf	CD19 on IgD+ CD24- B cell	4	0.0116391	0.024253	0.631298	-0.0358969	0.059175	1.01171	0.96474	1.06096
ebi-a-GCST90001725	ieu-b-85.vcf	CD19 on IgD+ CD24- B cell	4	-0.0208977	0.0488501	0.710462	-0.116644	0.0748484	0.979319	0.889902	1.07772
ebi-a-GCST90001725	ieu-b-85.vcf	CD19 on IgD+ CD24- B cell	4	0.00843638	0.0214051	0.693485	-0.0335176	0.0503903	1.00847	0.967038	1.05168
ebi-a-GCST90001725	ieu-b-85.vcf	CD19 on IgD+ CD24- B cell	4	0.008352	0.0219616	0.729052	-0.0346928	0.0513968	1.00839	0.965902	1.05274
ebi-a-GCST90001724	ieu-b-85.vcf	CD19 on IgD+ CD24+ B cell	3	0.0020906	0.0187137	0.911049	-0.0345883	0.0387695	1.00209	0.966003	1.03953
ebi-a-GCST90001724	ieu-b-85.vcf	CD19 on IgD+ CD24+ B cell	3	0.0578896	0.0526211	0.469673	-0.0452478	0.161027	1.0596	0.955761	1.17472
ebi-a-GCST90001724	ieu-b-85.vcf	CD19 on IgD+ CD24+ B cell	3	0.00461486	0.0197528	0.815272	-0.0341007	0.0433304	1.00463	0.966474	1.04428
ebi-a-GCST90001724	ieu-b-85.vcf	CD19 on IgD+ CD24+ B cell	3	0.00824795	0.0191299	0.70838	-0.0292467	0.0457426	1.00828	0.971177	1.0468
ebi-a-GCST90001723	ieu-b-85.vcf	CD19 on CD24+ CD27+ B cell	2	0.00740852	0.0178669	0.678398	-0.0276106	0.0424276	1.00744	0.972767	1.04334
ebi-a-GCST90001720	ieu-b-85.vcf	BAFF-R on transitional B cell	7	-0.00399128	0.0108385	0.712688	-0.0252348	0.0172523	0.996017	0.975081	1.0174
ebi-a-GCST90001720	ieu-b-85.vcf	BAFF-R on transitional B cell	7	-8.67908e-05	0.0188127	0.996497	-0.0369597	0.0367862	0.999913	0.963715	1.03747
ebi-a-GCST90001720	ieu-b-85.vcf	BAFF-R on transitional B cell	7	-0.00124747	0.0100266	0.900985	-0.0208995	0.0184046	0.998753	0.979317	1.01858
ebi-a-GCST90001720	ieu-b-85.vcf	BAFF-R on transitional B cell	7	-0.000991978	0.0105475	0.928133	-0.0216651	0.0196811	0.999009	0.978568	1.01988
ebi-a-GCST90001719	ieu-b-85.vcf	BAFF-R on IgD+ B cell	9	-0.00149675	0.0110571	0.892323	-0.0231686	0.0201751	0.998504	0.977098	1.02038
ebi-a-GCST90001719	ieu-b-85.vcf	BAFF-R on IgD+ B cell	9	-0.00673483	0.0166629	0.698144	-0.0393941	0.0259245	0.993288	0.961372	1.02626
ebi-a-GCST90001719	ieu-b-85.vcf	BAFF-R on IgD+ B cell	9	-0.000867674	0.00941497	0.926572	-0.019321	0.0175857	0.999133	0.980864	1.01774
ebi-a-GCST90001719	ieu-b-85.vcf	BAFF-R on IgD+ B cell	9	-0.000504096	0.00920392	0.957665	-0.0185438	0.0175356	0.999496	0.981627	1.01769
ebi-a-GCST90001718	ieu-b-85.vcf	BAFF-R on switched memory B cell	11	-0.00806339	0.0138264	0.559766	-0.0351631	0.0190363	0.991969	0.965448	1.01922
ebi-a-GCST90001718	ieu-b-85.vcf	BAFF-R on switched memory B cell	11	-0.00873482	0.0214049	0.692755	-0.0506884	0.0332187	0.991303	0.950575	1.03378
ebi-a-GCST90001718	ieu-b-85.vcf	BAFF-R on switched memory B cell	11	-0.00429796	0.00963885	0.655669	-0.0231901	0.0145942	0.995711	0.977077	1.0147
ebi-a-GCST90001718	ieu-b-85.vcf	BAFF-R on switched memory B cell	11	-0.00433898	0.00967534	0.663384	-0.0233027	0.0146247	0.99567	0.976967	1.01473
ebi-a-GCST90001717	ieu-b-85.vcf	BAFF-R on unswitched memory B cell	9	-0.0102441	0.0138761	0.460361	-0.0374413	0.0169531	0.989808	0.963251	1.0171
ebi-a-GCST90001717	ieu-b-85.vcf	BAFF-R on unswitched memory B cell	9	0.00598009	0.0233205	0.804991	-0.0397281	0.0516883	1.006	0.961051	1.05305
ebi-a-GCST90001717	ieu-b-85.vcf	BAFF-R on unswitched memory B cell	9	-0.00467776	0.00932393	0.615883	-0.0229527	0.0135971	0.995333	0.977309	1.01369
ebi-a-GCST90001717	ieu-b-85.vcf	BAFF-R on unswitched memory B cell	9	-0.00308245	0.00958393	0.755978	-0.0218669	0.015702	0.996922	0.97837	1.01583
ebi-a-GCST90001716	ieu-b-85.vcf	BAFF-R on naive-mature B cell	9	-0.00145988	0.011066	0.895043	-0.0231492	0.0202294	0.998541	0.977117	1.02044
ebi-a-GCST90001716	ieu-b-85.vcf	BAFF-R on naive-mature B cell	9	-0.00681272	0.0168807	0.698565	-0.0398989	0.0262734	0.99321	0.960887	1.02662
ebi-a-GCST90001716	ieu-b-85.vcf	BAFF-R on naive-mature B cell	9	-0.000956694	0.00923313	0.917475	-0.0190536	0.0171402	0.999044	0.981127	1.01729
ebi-a-GCST90001716	ieu-b-85.vcf	BAFF-R on naive-mature B cell	9	0.000235525	0.0103501	0.982402	-0.0200507	0.0205218	1.00024	0.980149	1.02073
ebi-a-GCST90001715	ieu-b-85.vcf	BAFF-R on memory B cell	9	-0.0103205	0.0138934	0.45758	-0.0375515	0.0169105	0.989733	0.963145	1.01705
ebi-a-GCST90001715	ieu-b-85.vcf	BAFF-R on memory B cell	9	0.00597088	0.0234683	0.80648	-0.0400269	0.0519687	1.00599	0.960764	1.05334
ebi-a-GCST90001715	ieu-b-85.vcf	BAFF-R on memory B cell	9	-0.0046568	0.00948165	0.623329	-0.0232408	0.0139272	0.995354	0.977027	1.01402
ebi-a-GCST90001715	ieu-b-85.vcf	BAFF-R on memory B cell	9	-0.0029108	0.00971656	0.77214	-0.0219553	0.0161337	0.997093	0.978284	1.01626
ebi-a-GCST90001713	ieu-b-85.vcf	BAFF-R on IgD- CD38+ B cell	3	0.0120405	0.0241396	0.617928	-0.035273	0.0593541	1.01211	0.965342	1.06115
ebi-a-GCST90001713	ieu-b-85.vcf	BAFF-R on IgD- CD38+ B cell	3	-0.00768231	0.0585687	0.91697	-0.122477	0.107112	0.992347	0.884726	1.11306
ebi-a-GCST90001713	ieu-b-85.vcf	BAFF-R on IgD- CD38+ B cell	3	0.00446662	0.0258287	0.862705	-0.0461577	0.055091	1.00448	0.954891	1.05664
ebi-a-GCST90001713	ieu-b-85.vcf	BAFF-R on IgD- CD38+ B cell	3	0.000460161	0.0268165	0.987867	-0.0521001	0.0530204	1.00046	0.949234	1.05445
ebi-a-GCST90001712	ieu-b-85.vcf	BAFF-R on IgD- CD38- B cell	8	-0.0095824	0.0121584	0.430621	-0.0334129	0.0142481	0.990463	0.967139	1.01435
ebi-a-GCST90001712	ieu-b-85.vcf	BAFF-R on IgD- CD38- B cell	8	0.00259248	0.0216212	0.908473	-0.039785	0.04497	1.0026	0.960996	1.046
ebi-a-GCST90001712	ieu-b-85.vcf	BAFF-R on IgD- CD38- B cell	8	-0.00535652	0.00951053	0.573285	-0.0239971	0.0132841	0.994658	0.976288	1.01337
ebi-a-GCST90001712	ieu-b-85.vcf	BAFF-R on IgD- CD38- B cell	8	-0.0055396	0.00981135	0.589964	-0.0247699	0.0136907	0.994476	0.975534	1.01378
ebi-a-GCST90001711	ieu-b-85.vcf	BAFF-R on IgD- CD27- B cell	11	-0.00407054	0.0155939	0.794066	-0.0346346	0.0264935	0.995938	0.965958	1.02685
ebi-a-GCST90001711	ieu-b-85.vcf	BAFF-R on IgD- CD27- B cell	11	-0.00846395	0.023538	0.727449	-0.0545984	0.0376705	0.991572	0.946865	1.03839
ebi-a-GCST90001711	ieu-b-85.vcf	BAFF-R on IgD- CD27- B cell	11	-0.00238379	0.00982908	0.808374	-0.0216488	0.0168812	0.997619	0.978584	1.01702
ebi-a-GCST90001711	ieu-b-85.vcf	BAFF-R on IgD- CD27- B cell	11	-0.00221463	0.010451	0.836437	-0.0226986	0.0182693	0.997788	0.977557	1.01844
ebi-a-GCST90001710	ieu-b-85.vcf	BAFF-R on IgD- CD24- B cell	11	-0.00443609	0.015657	0.776924	-0.0351237	0.0262516	0.995574	0.965486	1.0266
ebi-a-GCST90001710	ieu-b-85.vcf	BAFF-R on IgD- CD24- B cell	11	-0.00922385	0.0236232	0.705279	-0.0555253	0.0370776	0.990819	0.945988	1.03777
ebi-a-GCST90001710	ieu-b-85.vcf	BAFF-R on IgD- CD24- B cell	11	-0.00257479	0.00966185	0.789862	-0.021512	0.0163624	0.997429	0.978718	1.0165
ebi-a-GCST90001710	ieu-b-85.vcf	BAFF-R on IgD- CD24- B cell	11	-0.00271786	0.0104015	0.799167	-0.0231047	0.017669	0.997286	0.97716	1.01783
ebi-a-GCST90001709	ieu-b-85.vcf	BAFF-R on IgD+ CD38dim B cell	9	-0.00146443	0.0109962	0.894054	-0.023017	0.0200881	0.998537	0.977246	1.02029
ebi-a-GCST90001709	ieu-b-85.vcf	BAFF-R on IgD+ CD38dim B cell	9	-0.00665687	0.0166377	0.701005	-0.0392667	0.0259529	0.993365	0.961494	1.02629
ebi-a-GCST90001709	ieu-b-85.vcf	BAFF-R on IgD+ CD38dim B cell	9	-0.000966326	0.00956728	0.919548	-0.0197182	0.0177855	0.999034	0.980475	1.01794
ebi-a-GCST90001709	ieu-b-85.vcf	BAFF-R on IgD+ CD38dim B cell	9	-0.000245756	0.00943249	0.979852	-0.0187334	0.0182419	0.999754	0.981441	1.01841
ebi-a-GCST90001708	ieu-b-85.vcf	BAFF-R on IgD+ CD38+ B cell	9	-0.00123497	0.0110529	0.911035	-0.0228986	0.0204287	0.998766	0.977362	1.02064
ebi-a-GCST90001708	ieu-b-85.vcf	BAFF-R on IgD+ CD38+ B cell	9	-0.00735868	0.0166444	0.671745	-0.0399817	0.0252643	0.992668	0.960807	1.02559
ebi-a-GCST90001708	ieu-b-85.vcf	BAFF-R on IgD+ CD38+ B cell	9	-0.00105292	0.00990034	0.915303	-0.0204576	0.0183518	0.998948	0.97975	1.01852
ebi-a-GCST90001708	ieu-b-85.vcf	BAFF-R on IgD+ CD38+ B cell	9	-0.000734893	0.0103466	0.945119	-0.0210142	0.0195444	0.999265	0.979205	1.01974
ebi-a-GCST90001707	ieu-b-85.vcf	BAFF-R on IgD+ CD38- unswitched memory B cell	8	-0.00324106	0.0177836	0.855387	-0.038097	0.0316148	0.996764	0.96262	1.03212
ebi-a-GCST90001707	ieu-b-85.vcf	BAFF-R on IgD+ CD38- unswitched memory B cell	8	0.00145539	0.0326162	0.965857	-0.0624723	0.0653831	1.00146	0.939439	1.06757
ebi-a-GCST90001707	ieu-b-85.vcf	BAFF-R on IgD+ CD38- unswitched memory B cell	8	-0.002387	0.00947855	0.801171	-0.020965	0.016191	0.997616	0.979253	1.01632
ebi-a-GCST90001707	ieu-b-85.vcf	BAFF-R on IgD+ CD38- unswitched memory B cell	8	-0.00224432	0.00907727	0.811813	-0.0200358	0.0155471	0.997758	0.980164	1.01567
ebi-a-GCST90001706	ieu-b-85.vcf	BAFF-R on IgD+ CD38- naive B cell	7	-0.00567426	0.00995544	0.568701	-0.0251869	0.0138384	0.994342	0.975128	1.01393
ebi-a-GCST90001706	ieu-b-85.vcf	BAFF-R on IgD+ CD38- naive B cell	7	-0.00274001	0.0174719	0.88152	-0.0369849	0.0315049	0.997264	0.963691	1.03201
ebi-a-GCST90001706	ieu-b-85.vcf	BAFF-R on IgD+ CD38- naive B cell	7	-0.00359032	0.00947775	0.704825	-0.0221667	0.0149861	0.996416	0.978077	1.0151
ebi-a-GCST90001706	ieu-b-85.vcf	BAFF-R on IgD+ CD38- naive B cell	7	-0.00290059	0.0099702	0.780903	-0.0224422	0.016641	0.997104	0.977808	1.01678
ebi-a-GCST90001705	ieu-b-85.vcf	BAFF-R on IgD+ CD38- B cell	8	-0.00272129	0.011244	0.808764	-0.0247596	0.019317	0.997282	0.975544	1.0195
ebi-a-GCST90001705	ieu-b-85.vcf	BAFF-R on IgD+ CD38- B cell	8	-0.00295806	0.0190853	0.88191	-0.0403652	0.034449	0.997046	0.960439	1.03505
ebi-a-GCST90001705	ieu-b-85.vcf	BAFF-R on IgD+ CD38- B cell	8	-0.00131184	0.00943135	0.889376	-0.0197973	0.0171736	0.998689	0.980397	1.01732
ebi-a-GCST90001705	ieu-b-85.vcf	BAFF-R on IgD+ CD38- B cell	8	-0.0015647	0.00997106	0.879735	-0.021108	0.0179786	0.998437	0.979113	1.01814
ebi-a-GCST90001704	ieu-b-85.vcf	BAFF-R on IgD+ CD24- B cell	9	-0.000919648	0.0106079	0.930915	-0.0217112	0.0198719	0.999081	0.978523	1.02007
ebi-a-GCST90001704	ieu-b-85.vcf	BAFF-R on IgD+ CD24- B cell	9	-0.00657506	0.0160563	0.694413	-0.0380454	0.0248953	0.993447	0.962669	1.02521
ebi-a-GCST90001704	ieu-b-85.vcf	BAFF-R on IgD+ CD24- B cell	9	-0.000954949	0.00920837	0.917404	-0.0190034	0.0170935	0.999046	0.981176	1.01724
ebi-a-GCST90001704	ieu-b-85.vcf	BAFF-R on IgD+ CD24- B cell	9	-0.000660471	0.0103509	0.950689	-0.0209483	0.0196274	0.99934	0.97927	1.01982
ebi-a-GCST90001703	ieu-b-85.vcf	BAFF-R on IgD+ CD24+ B cell	7	-0.0099375	0.0113917	0.383021	-0.0322653	0.0123903	0.990112	0.96825	1.01247
ebi-a-GCST90001703	ieu-b-85.vcf	BAFF-R on IgD+ CD24+ B cell	7	0.00651869	0.0184346	0.738051	-0.029613	0.0426504	1.00654	0.970821	1.04357
ebi-a-GCST90001703	ieu-b-85.vcf	BAFF-R on IgD+ CD24+ B cell	7	-0.00504038	0.00957864	0.598742	-0.0238145	0.0137338	0.994972	0.976467	1.01383
ebi-a-GCST90001703	ieu-b-85.vcf	BAFF-R on IgD+ CD24+ B cell	7	-0.00319587	0.00956304	0.749608	-0.0219394	0.0155477	0.996809	0.978299	1.01567
ebi-a-GCST90001702	ieu-b-85.vcf	BAFF-R on CD24+ CD27+ B cell	10	-0.00916804	0.0142607	0.520297	-0.037119	0.018783	0.990874	0.963561	1.01896
ebi-a-GCST90001702	ieu-b-85.vcf	BAFF-R on CD24+ CD27+ B cell	10	0.00330863	0.0247222	0.896841	-0.0451469	0.0517642	1.00331	0.955857	1.05313
ebi-a-GCST90001702	ieu-b-85.vcf	BAFF-R on CD24+ CD27+ B cell	10	-0.00465125	0.0092421	0.614776	-0.0227658	0.0134633	0.99536	0.977491	1.01355
ebi-a-GCST90001702	ieu-b-85.vcf	BAFF-R on CD24+ CD27+ B cell	10	-0.00492975	0.00949376	0.616105	-0.0235375	0.013678	0.995082	0.976737	1.01377
ebi-a-GCST90001700	ieu-b-85.vcf	CD45RA+ CD28- CD8+ T cell %T cell	64	0.000261291	0.00014756	0.076603	-2.79263e-05	0.000550509	1.00026	0.999972	1.00055
ebi-a-GCST90001700	ieu-b-85.vcf	CD45RA+ CD28- CD8+ T cell %T cell	64	0.000469917	0.000283011	0.10188	-8.47853e-05	0.00102462	1.00047	0.999915	1.00103
ebi-a-GCST90001700	ieu-b-85.vcf	CD45RA+ CD28- CD8+ T cell %T cell	64	0.000411373	0.000238581	0.0846624	-5.6245e-05	0.000878991	1.00041	0.999944	1.00088
ebi-a-GCST90001700	ieu-b-85.vcf	CD45RA+ CD28- CD8+ T cell %T cell	64	0.000424664	0.000238813	0.0801922	-4.341e-05	0.000892737	1.00042	0.999957	1.00089
ebi-a-GCST90001699	ieu-b-85.vcf	CD45RA+ CD28- CD8+ T cell %CD8+ T cell	2	-0.0010086	0.000994466	0.310481	-0.00295776	0.000940552	0.998992	0.997047	1.00094
ebi-a-GCST90001698	ieu-b-85.vcf	CD45RA+ CD28- CD8+ T cell Absolute Count	417	-1.00526e-06	3.13655e-06	0.748591	-7.1529e-06	5.14239e-06	0.999999	0.999993	1.00001
ebi-a-GCST90001698	ieu-b-85.vcf	CD45RA+ CD28- CD8+ T cell Absolute Count	417	4.37223e-06	4.46382e-06	0.327913	-4.37687e-06	1.31213e-05	1	0.999996	1.00001
ebi-a-GCST90001698	ieu-b-85.vcf	CD45RA+ CD28- CD8+ T cell Absolute Count	417	3.30729e-06	5.41339e-06	0.541235	-7.30296e-06	1.39175e-05	1	0.999993	1.00001
ebi-a-GCST90001698	ieu-b-85.vcf	CD45RA+ CD28- CD8+ T cell Absolute Count	417	3.36878e-06	4.67977e-06	0.472015	-5.80357e-06	1.25411e-05	1	0.999994	1.00001
ebi-a-GCST90001697	ieu-b-85.vcf	CD45RA- CD28- CD8+ T cell %T cell	37	3.98165e-05	0.000263662	0.879965	-0.000476962	0.000556595	1.00004	0.999523	1.00056
ebi-a-GCST90001697	ieu-b-85.vcf	CD45RA- CD28- CD8+ T cell %T cell	37	-0.000398272	0.00051278	0.442559	-0.00140332	0.000606778	0.999602	0.998598	1.00061
ebi-a-GCST90001697	ieu-b-85.vcf	CD45RA- CD28- CD8+ T cell %T cell	37	0.000123727	0.000379155	0.74418	-0.000619417	0.000866871	1.00012	0.999381	1.00087
ebi-a-GCST90001697	ieu-b-85.vcf	CD45RA- CD28- CD8+ T cell %T cell	37	0.000112311	0.000405193	0.783228	-0.000681866	0.000906488	1.00011	0.999318	1.00091
ebi-a-GCST90001696	ieu-b-85.vcf	CD45RA- CD28- CD8+ T cell %CD8+ T cell	8	7.63739e-05	0.000479482	0.873445	-0.00086341	0.00101616	1.00008	0.999137	1.00102
ebi-a-GCST90001696	ieu-b-85.vcf	CD45RA- CD28- CD8+ T cell %CD8+ T cell	8	9.67711e-06	0.000540618	0.986299	-0.00104993	0.00106929	1.00001	0.998951	1.00107
ebi-a-GCST90001696	ieu-b-85.vcf	CD45RA- CD28- CD8+ T cell %CD8+ T cell	8	0.000100008	0.000586608	0.864629	-0.00104974	0.00124976	1.0001	0.998951	1.00125
ebi-a-GCST90001696	ieu-b-85.vcf	CD45RA- CD28- CD8+ T cell %CD8+ T cell	8	0.000100269	0.000568278	0.864942	-0.00101356	0.00121409	1.0001	0.998987	1.00121
ebi-a-GCST90001695	ieu-b-85.vcf	CD45RA- CD28- CD8+ T cell Absolute Count	145	1.06606e-06	6.21011e-06	0.863701	-1.11058e-05	1.32379e-05	1	0.999989	1.00001
ebi-a-GCST90001695	ieu-b-85.vcf	CD45RA- CD28- CD8+ T cell Absolute Count	145	-1.97677e-06	9.59829e-06	0.837123	-2.07894e-05	1.68359e-05	0.999998	0.999979	1.00002
ebi-a-GCST90001695	ieu-b-85.vcf	CD45RA- CD28- CD8+ T cell Absolute Count	145	-8.97267e-07	9.82701e-06	0.927249	-2.01582e-05	1.83637e-05	0.999999	0.99998	1.00002
ebi-a-GCST90001695	ieu-b-85.vcf	CD45RA- CD28- CD8+ T cell Absolute Count	145	1.26541e-06	8.7134e-06	0.884735	-1.58129e-05	1.83437e-05	1	0.999984	1.00002
ebi-a-GCST90001694	ieu-b-85.vcf	CD28- CD4-CD8- T cell %T cell	2	-0.0645232	0.0467228	0.167286	-0.1561	0.0270535	0.937514	0.855474	1.02742
ebi-a-GCST90001693	ieu-b-85.vcf	CD28+ CD45RA- CD8+ T cell Absolute Count	2	0.00789595	0.0146136	0.58898	-0.0207468	0.0365387	1.00793	0.979467	1.03721
ebi-a-GCST90001692	ieu-b-85.vcf	CD28+ CD45RA- CD8+ T cell %CD8+ T cell	4	0.0092158	0.0116938	0.430642	-0.013704	0.0321356	1.00926	0.986389	1.03266
ebi-a-GCST90001692	ieu-b-85.vcf	CD28+ CD45RA- CD8+ T cell %CD8+ T cell	4	0.00419735	0.0162788	0.820635	-0.0277092	0.0361039	1.00421	0.972671	1.03676
ebi-a-GCST90001692	ieu-b-85.vcf	CD28+ CD45RA- CD8+ T cell %CD8+ T cell	4	0.00328208	0.0121972	0.787864	-0.0206244	0.0271885	1.00329	0.979587	1.02756
ebi-a-GCST90001692	ieu-b-85.vcf	CD28+ CD45RA- CD8+ T cell %CD8+ T cell	4	0.0102893	0.013102	0.489577	-0.0153907	0.0359692	1.01034	0.984727	1.03662
ebi-a-GCST90001691	ieu-b-85.vcf	CD28+ CD45RA- CD8+ T cell %T cell	3	0.00852701	0.0127219	0.502689	-0.0164078	0.0334619	1.00856	0.983726	1.03403
ebi-a-GCST90001691	ieu-b-85.vcf	CD28+ CD45RA- CD8+ T cell %T cell	3	-0.0134519	0.027562	0.710942	-0.0674735	0.0405696	0.986638	0.934753	1.0414
ebi-a-GCST90001691	ieu-b-85.vcf	CD28+ CD45RA- CD8+ T cell %T cell	3	0.0070797	0.0132122	0.592066	-0.0188162	0.0329756	1.0071	0.98136	1.03353
ebi-a-GCST90001691	ieu-b-85.vcf	CD28+ CD45RA- CD8+ T cell %T cell	3	0.00628783	0.0126754	0.669002	-0.018556	0.0311317	1.00631	0.981615	1.03162
ebi-a-GCST90001690	ieu-b-85.vcf	CD28+ CD45RA+ CD8+ T cell Absolute Count	2	-0.026604	0.11849	0.822349	-0.258845	0.205637	0.973747	0.771943	1.22831
ebi-a-GCST90001688	ieu-b-85.vcf	CD28+ CD45RA+ CD8+ T cell %T cell	35	0.00020182	0.00119218	0.865571	-0.00213484	0.00253849	1.0002	0.997867	1.00254
ebi-a-GCST90001688	ieu-b-85.vcf	CD28+ CD45RA+ CD8+ T cell %T cell	35	0.00230558	0.0024696	0.357299	-0.00253484	0.00714601	1.00231	0.997468	1.00717
ebi-a-GCST90001688	ieu-b-85.vcf	CD28+ CD45RA+ CD8+ T cell %T cell	35	0.00149431	0.00169577	0.378212	-0.00182941	0.00481802	1.0015	0.998172	1.00483
ebi-a-GCST90001688	ieu-b-85.vcf	CD28+ CD45RA+ CD8+ T cell %T cell	35	0.00214279	0.00214988	0.32595	-0.00207098	0.00635656	1.00215	0.997931	1.00638
ebi-a-GCST90001687	ieu-b-85.vcf	CD28- CD8+ T cell Absolute Count	2	-0.0132881	0.0560587	0.812627	-0.123163	0.096587	0.9868	0.884119	1.10141
ebi-a-GCST90001681	ieu-b-85.vcf	CD25++ CD8+ T cell Absolute Count	3	-0.0249612	0.0229261	0.276255	-0.0698964	0.0199739	0.975348	0.93249	1.02017
ebi-a-GCST90001681	ieu-b-85.vcf	CD25++ CD8+ T cell Absolute Count	3	-0.0265025	0.0455924	0.664788	-0.115864	0.0628587	0.973846	0.890597	1.06488
ebi-a-GCST90001681	ieu-b-85.vcf	CD25++ CD8+ T cell Absolute Count	3	-0.0318973	0.0253008	0.207409	-0.0814868	0.0176923	0.968606	0.921745	1.01785
ebi-a-GCST90001681	ieu-b-85.vcf	CD25++ CD8+ T cell Absolute Count	3	-0.0334181	0.0262545	0.331018	-0.084877	0.0180407	0.967134	0.918625	1.0182
ebi-a-GCST90001679	ieu-b-85.vcf	CD25++ CD8+ T cell %T cell	2	-0.0399713	0.0226745	0.0779299	-0.0844134	0.00447083	0.960817	0.919051	1.00448
ebi-a-GCST90001672	ieu-b-85.vcf	CD39+ CD8+ T cell Absolute Count	6	0.00731981	0.0132895	0.581773	-0.0187276	0.0333673	1.00735	0.981447	1.03393
ebi-a-GCST90001672	ieu-b-85.vcf	CD39+ CD8+ T cell Absolute Count	6	0.0245805	0.0276916	0.42488	-0.0296951	0.0788561	1.02489	0.970741	1.08205
ebi-a-GCST90001672	ieu-b-85.vcf	CD39+ CD8+ T cell Absolute Count	6	0.0035863	0.0076347	0.638543	-0.0113777	0.0185503	1.00359	0.988687	1.01872
ebi-a-GCST90001672	ieu-b-85.vcf	CD39+ CD8+ T cell Absolute Count	6	0.00223127	0.00843696	0.801978	-0.0143052	0.0187677	1.00223	0.985797	1.01894
ebi-a-GCST90001671	ieu-b-85.vcf	CD39+ CD8+ T cell %CD8+ T cell	6	0.0249787	0.0343187	0.466708	-0.0422859	0.0922433	1.02529	0.958596	1.09663
ebi-a-GCST90001671	ieu-b-85.vcf	CD39+ CD8+ T cell %CD8+ T cell	6	0.0968448	0.0651399	0.21129	-0.0308295	0.224519	1.10169	0.969641	1.25172
ebi-a-GCST90001671	ieu-b-85.vcf	CD39+ CD8+ T cell %CD8+ T cell	6	0.00181161	0.0260491	0.944555	-0.0492446	0.0528678	1.00181	0.951948	1.05429
ebi-a-GCST90001671	ieu-b-85.vcf	CD39+ CD8+ T cell %CD8+ T cell	6	-0.0198858	0.0269685	0.494024	-0.0727441	0.0329725	0.980311	0.929839	1.03352
ebi-a-GCST90001670	ieu-b-85.vcf	CD39+ CD8+ T cell %T cell	7	0.00404329	0.013502	0.764591	-0.0224207	0.0305073	1.00405	0.977829	1.03098
ebi-a-GCST90001670	ieu-b-85.vcf	CD39+ CD8+ T cell %T cell	7	0.0179937	0.0286679	0.557773	-0.0381954	0.0741828	1.01816	0.962525	1.077
ebi-a-GCST90001670	ieu-b-85.vcf	CD39+ CD8+ T cell %T cell	7	0.00261233	0.00769747	0.734327	-0.0124747	0.0176994	1.00262	0.987603	1.01786
ebi-a-GCST90001670	ieu-b-85.vcf	CD39+ CD8+ T cell %T cell	7	0.000964691	0.00788545	0.906626	-0.0144908	0.0164202	1.00097	0.985614	1.01656
ebi-a-GCST90001669	ieu-b-85.vcf	CD28+ CD45RA- CD8dim T cell Absolute Count	3	-0.00144248	0.0146015	0.921305	-0.0300615	0.0271765	0.998559	0.970386	1.02755
ebi-a-GCST90001669	ieu-b-85.vcf	CD28+ CD45RA- CD8dim T cell Absolute Count	3	0.0427852	0.0352193	0.438445	-0.0262446	0.111815	1.04371	0.974097	1.11831
ebi-a-GCST90001669	ieu-b-85.vcf	CD28+ CD45RA- CD8dim T cell Absolute Count	3	0.00171841	0.0124374	0.89011	-0.0226589	0.0260957	1.00172	0.977596	1.02644
ebi-a-GCST90001669	ieu-b-85.vcf	CD28+ CD45RA- CD8dim T cell Absolute Count	3	0.00638206	0.0136969	0.687072	-0.0204639	0.0332281	1.0064	0.979744	1.03379
ebi-a-GCST90001668	ieu-b-85.vcf	CD28+ CD45RA- CD8dim T cell %CD8dim T cell	2	0.00520967	0.0120143	0.664562	-0.0183383	0.0287577	1.00522	0.981829	1.02918
ebi-a-GCST90001667	ieu-b-85.vcf	CD28+ CD45RA- CD8dim T cell %T cell	3	-0.00195918	0.0155074	0.899464	-0.0323536	0.0284353	0.998043	0.968164	1.02884
ebi-a-GCST90001667	ieu-b-85.vcf	CD28+ CD45RA- CD8dim T cell %T cell	3	0.0512899	0.0309356	0.345515	-0.00934388	0.111924	1.05263	0.9907	1.11843
ebi-a-GCST90001667	ieu-b-85.vcf	CD28+ CD45RA- CD8dim T cell %T cell	3	0.00191716	0.0125949	0.879016	-0.0227688	0.0266031	1.00192	0.977488	1.02696
ebi-a-GCST90001667	ieu-b-85.vcf	CD28+ CD45RA- CD8dim T cell %T cell	3	0.00550705	0.0139114	0.730442	-0.0217593	0.0327734	1.00552	0.978476	1.03332
ebi-a-GCST90001666	ieu-b-85.vcf	CD28+ CD45RA+ CD8dim T cell Absolute Count	8	-0.00131688	0.0037104	0.722652	-0.00858927	0.0059555	0.998684	0.991448	1.00597
ebi-a-GCST90001666	ieu-b-85.vcf	CD28+ CD45RA+ CD8dim T cell Absolute Count	8	0.000128633	0.00430377	0.977125	-0.00830675	0.00856402	1.00013	0.991728	1.0086
ebi-a-GCST90001666	ieu-b-85.vcf	CD28+ CD45RA+ CD8dim T cell Absolute Count	8	0.000359623	0.004223	0.932136	-0.00791745	0.0086367	1.00036	0.992114	1.00867
ebi-a-GCST90001666	ieu-b-85.vcf	CD28+ CD45RA+ CD8dim T cell Absolute Count	8	-0.00176519	0.0040062	0.672778	-0.00961735	0.00608696	0.998236	0.990429	1.00611
ebi-a-GCST90001665	ieu-b-85.vcf	CD28+ CD45RA+ CD8dim T cell %CD8dim T cell	5	-0.00797325	0.0100402	0.427118	-0.027652	0.0117055	0.992058	0.972727	1.01177
ebi-a-GCST90001665	ieu-b-85.vcf	CD28+ CD45RA+ CD8dim T cell %CD8dim T cell	5	-0.0022136	0.0120253	0.865692	-0.0257832	0.021356	0.997789	0.974546	1.02159
ebi-a-GCST90001665	ieu-b-85.vcf	CD28+ CD45RA+ CD8dim T cell %CD8dim T cell	5	-0.0104923	0.0114161	0.358054	-0.0328677	0.0118832	0.989563	0.967667	1.01195
ebi-a-GCST90001665	ieu-b-85.vcf	CD28+ CD45RA+ CD8dim T cell %CD8dim T cell	5	-0.0132302	0.011465	0.31277	-0.0357016	0.00924123	0.986857	0.964928	1.00928
ebi-a-GCST90001664	ieu-b-85.vcf	CD28+ CD45RA+ CD8dim T cell %T cell	6	-0.00920207	0.0108704	0.397259	-0.030508	0.0121039	0.99084	0.969953	1.01218
ebi-a-GCST90001664	ieu-b-85.vcf	CD28+ CD45RA+ CD8dim T cell %T cell	6	-0.0053648	0.0148552	0.736262	-0.034481	0.0237514	0.99465	0.966107	1.02404
ebi-a-GCST90001664	ieu-b-85.vcf	CD28+ CD45RA+ CD8dim T cell %T cell	6	-0.0137148	0.0127723	0.282917	-0.0387486	0.011319	0.986379	0.961993	1.01138
ebi-a-GCST90001664	ieu-b-85.vcf	CD28+ CD45RA+ CD8dim T cell %T cell	6	-0.0155238	0.0132113	0.292885	-0.0414179	0.0103703	0.984596	0.959428	1.01042
ebi-a-GCST90001663	ieu-b-85.vcf	CD28- CD8dim T cell Absolute Count	2	-0.0148634	0.0370023	0.687912	-0.087388	0.0576611	0.985246	0.916322	1.05936
ebi-a-GCST90001661	ieu-b-85.vcf	CD28- CD8dim T cell %T cell	3	0.0115756	0.0342843	0.735638	-0.0556216	0.0787727	1.01164	0.945897	1.08196
ebi-a-GCST90001661	ieu-b-85.vcf	CD28- CD8dim T cell %T cell	3	0.0783723	0.0954856	0.562463	-0.10878	0.265524	1.08153	0.896928	1.30411
ebi-a-GCST90001661	ieu-b-85.vcf	CD28- CD8dim T cell %T cell	3	0.0103925	0.0413863	0.801729	-0.0707246	0.0915096	1.01045	0.931718	1.09583
ebi-a-GCST90001661	ieu-b-85.vcf	CD28- CD8dim T cell %T cell	3	-0.00204308	0.0488014	0.97041	-0.0976939	0.0936078	0.997959	0.906926	1.09813
ebi-a-GCST90001660	ieu-b-85.vcf	CD39+ CD4+ T cell Absolute Count	5	-0.00119978	0.0161989	0.940958	-0.0329497	0.0305501	0.998801	0.967587	1.03102
ebi-a-GCST90001660	ieu-b-85.vcf	CD39+ CD4+ T cell Absolute Count	5	0.029938	0.0455918	0.55828	-0.059422	0.119298	1.03039	0.942309	1.12671
ebi-a-GCST90001660	ieu-b-85.vcf	CD39+ CD4+ T cell Absolute Count	5	0.00470542	0.0196483	0.810732	-0.0338053	0.0432161	1.00472	0.96676	1.04416
ebi-a-GCST90001660	ieu-b-85.vcf	CD39+ CD4+ T cell Absolute Count	5	0.00443364	0.0211247	0.844018	-0.0369708	0.0458381	1.00444	0.963704	1.0469
ebi-a-GCST90001659	ieu-b-85.vcf	CD39+ CD4+ T cell %CD4+ T cell	6	0.00336005	0.00715571	0.638668	-0.0106651	0.0173852	1.00337	0.989392	1.01754
ebi-a-GCST90001659	ieu-b-85.vcf	CD39+ CD4+ T cell %CD4+ T cell	6	0.00950901	0.0121301	0.476906	-0.014266	0.033284	1.00955	0.985835	1.03384
ebi-a-GCST90001659	ieu-b-85.vcf	CD39+ CD4+ T cell %CD4+ T cell	6	0.00438903	0.00758496	0.562826	-0.0104775	0.0192556	1.0044	0.989577	1.01944
ebi-a-GCST90001659	ieu-b-85.vcf	CD39+ CD4+ T cell %CD4+ T cell	6	0.00445599	0.00741429	0.574044	-0.010076	0.018988	1.00447	0.989975	1.01917
ebi-a-GCST90001658	ieu-b-85.vcf	CD39+ CD4+ T cell %T cell	6	0.00345967	0.00723575	0.632554	-0.0107224	0.0176418	1.00347	0.989335	1.0178
ebi-a-GCST90001658	ieu-b-85.vcf	CD39+ CD4+ T cell %T cell	6	0.00965452	0.012178	0.472273	-0.0142143	0.0335234	1.0097	0.985886	1.03409
ebi-a-GCST90001658	ieu-b-85.vcf	CD39+ CD4+ T cell %T cell	6	0.00442735	0.00758277	0.559309	-0.0104349	0.0192896	1.00444	0.989619	1.01948
ebi-a-GCST90001658	ieu-b-85.vcf	CD39+ CD4+ T cell %T cell	6	0.00453643	0.00807174	0.598366	-0.0112842	0.020357	1.00455	0.988779	1.02057
ebi-a-GCST90001654	ieu-b-85.vcf	CD28- CD4-CD8- T cell Absolute Count	2	-0.0710231	0.0389224	0.068041	-0.147311	0.00526483	0.93144	0.863025	1.00528
ebi-a-GCST90001650	ieu-b-85.vcf	HLA DR+ Natural Killer %CD3- lymphocyte	4	0.0204767	0.0167493	0.221502	-0.0123518	0.0533053	1.02069	0.987724	1.05475
ebi-a-GCST90001650	ieu-b-85.vcf	HLA DR+ Natural Killer %CD3- lymphocyte	4	0.0320813	0.0274075	0.362385	-0.0216374	0.0857999	1.0326	0.978595	1.08959
ebi-a-GCST90001650	ieu-b-85.vcf	HLA DR+ Natural Killer %CD3- lymphocyte	4	0.0222115	0.0172488	0.197845	-0.0115961	0.0560191	1.02246	0.988471	1.05762
ebi-a-GCST90001650	ieu-b-85.vcf	HLA DR+ Natural Killer %CD3- lymphocyte	4	0.0258843	0.0185631	0.257519	-0.0104993	0.0622679	1.02622	0.989556	1.06425
ebi-a-GCST90001649	ieu-b-85.vcf	HLA DR+ Natural Killer %Natural Killer	7	0.0381892	0.0147778	0.00975972	0.00922473	0.0671537	1.03893	1.00927	1.06946
ebi-a-GCST90001649	ieu-b-85.vcf	HLA DR+ Natural Killer %Natural Killer	7	0.0185226	0.026126	0.510021	-0.0326844	0.0697296	1.0187	0.967844	1.07222
ebi-a-GCST90001649	ieu-b-85.vcf	HLA DR+ Natural Killer %Natural Killer	7	0.0279999	0.0179591	0.118974	-0.00719992	0.0631998	1.0284	0.992826	1.06524
ebi-a-GCST90001649	ieu-b-85.vcf	HLA DR+ Natural Killer %Natural Killer	7	0.0297615	0.0206618	0.199823	-0.0107357	0.0702586	1.03021	0.989322	1.07279
ebi-a-GCST90001648	ieu-b-85.vcf	HLA DR+ Natural Killer Absolute Count	3	0.0245313	0.0181024	0.175374	-0.0109495	0.060012	1.02483	0.98911	1.06185
ebi-a-GCST90001648	ieu-b-85.vcf	HLA DR+ Natural Killer Absolute Count	3	0.0423055	0.0463005	0.528684	-0.0484434	0.133054	1.04321	0.952711	1.14231
ebi-a-GCST90001648	ieu-b-85.vcf	HLA DR+ Natural Killer Absolute Count	3	0.025535	0.0178808	0.153274	-0.00951147	0.0605814	1.02586	0.990534	1.06245
ebi-a-GCST90001648	ieu-b-85.vcf	HLA DR+ Natural Killer Absolute Count	3	0.0271213	0.0182948	0.276434	-0.00873644	0.062979	1.02749	0.991302	1.065
ebi-a-GCST90001647	ieu-b-85.vcf	Natural Killer %lymphocyte	3	-0.0165766	0.0267827	0.535962	-0.0690708	0.0359175	0.98356	0.933261	1.03657
ebi-a-GCST90001647	ieu-b-85.vcf	Natural Killer %lymphocyte	3	0.0290499	0.251737	0.926859	-0.464355	0.522455	1.02948	0.62854	1.68616
ebi-a-GCST90001647	ieu-b-85.vcf	Natural Killer %lymphocyte	3	-0.0160646	0.0290558	0.58034	-0.073014	0.0408848	0.984064	0.929588	1.04173
ebi-a-GCST90001647	ieu-b-85.vcf	Natural Killer %lymphocyte	3	-0.0268679	0.036849	0.541745	-0.0990919	0.0453561	0.97349	0.90566	1.0464
ebi-a-GCST90001646	ieu-b-85.vcf	Natural Killer %CD3- lymphocyte	5	-0.00102508	0.0133714	0.938892	-0.027233	0.0251829	0.998975	0.973134	1.0255
ebi-a-GCST90001646	ieu-b-85.vcf	Natural Killer %CD3- lymphocyte	5	0.00239688	0.0163687	0.892868	-0.0296857	0.0344795	1.0024	0.970751	1.03508
ebi-a-GCST90001646	ieu-b-85.vcf	Natural Killer %CD3- lymphocyte	5	-0.000328194	0.0143436	0.981745	-0.0284417	0.0277853	0.999672	0.971959	1.02817
ebi-a-GCST90001646	ieu-b-85.vcf	Natural Killer %CD3- lymphocyte	5	0.00131014	0.0135804	0.927785	-0.0253075	0.0279278	1.00131	0.97501	1.02832
ebi-a-GCST90001645	ieu-b-85.vcf	Natural Killer Absolute Count	3	-0.0241457	0.0316415	0.445403	-0.0861629	0.0378716	0.976144	0.917445	1.0386
ebi-a-GCST90001645	ieu-b-85.vcf	Natural Killer Absolute Count	3	0.00109114	0.233889	0.99703	-0.45733	0.459513	1.00109	0.632971	1.5833
ebi-a-GCST90001645	ieu-b-85.vcf	Natural Killer Absolute Count	3	-0.0234536	0.0341563	0.492301	-0.0904	0.0434929	0.976819	0.913566	1.04445
ebi-a-GCST90001645	ieu-b-85.vcf	Natural Killer Absolute Count	3	-0.0324161	0.0409783	0.511821	-0.112734	0.0479013	0.968104	0.893389	1.04907
ebi-a-GCST90001644	ieu-b-85.vcf	B cell %lymphocyte	2	-0.0555678	0.0461223	0.228283	-0.145968	0.0348319	0.945948	0.864186	1.03545
ebi-a-GCST90001643	ieu-b-85.vcf	B cell %CD3- lymphocyte	3	-0.00243375	0.0160995	0.879842	-0.0339887	0.0291212	0.997569	0.966582	1.02955
ebi-a-GCST90001643	ieu-b-85.vcf	B cell %CD3- lymphocyte	3	0.000297714	0.0260007	0.992711	-0.0506637	0.0512591	1.0003	0.950598	1.0526
ebi-a-GCST90001643	ieu-b-85.vcf	B cell %CD3- lymphocyte	3	-2.64608e-05	0.0147044	0.998564	-0.0288471	0.0287942	0.999974	0.971565	1.02921
ebi-a-GCST90001643	ieu-b-85.vcf	B cell %CD3- lymphocyte	3	-2.68073e-05	0.0146533	0.998706	-0.0287474	0.0286938	0.999973	0.971662	1.02911
ebi-a-GCST90001638	ieu-b-85.vcf	CD4-CD8- Natural Killer T %lymphocyte	7	3.79833e-05	0.0203873	0.998513	-0.0399212	0.0399971	1.00004	0.960865	1.04081
ebi-a-GCST90001638	ieu-b-85.vcf	CD4-CD8- Natural Killer T %lymphocyte	7	0.0101777	0.0407884	0.812882	-0.0697675	0.090123	1.01023	0.932611	1.09431
ebi-a-GCST90001638	ieu-b-85.vcf	CD4-CD8- Natural Killer T %lymphocyte	7	-0.00584606	0.0265144	0.825493	-0.0578143	0.0461222	0.994171	0.943825	1.0472
ebi-a-GCST90001638	ieu-b-85.vcf	CD4-CD8- Natural Killer T %lymphocyte	7	-0.0111983	0.0412359	0.795057	-0.0920207	0.0696241	0.988864	0.912086	1.07211
ebi-a-GCST90001637	ieu-b-85.vcf	CD4-CD8- Natural Killer T %T cell	6	0.0024729	0.0208403	0.905545	-0.038374	0.0433198	1.00248	0.962353	1.04427
ebi-a-GCST90001637	ieu-b-85.vcf	CD4-CD8- Natural Killer T %T cell	6	0.00443685	0.0536184	0.938027	-0.100655	0.109529	1.00445	0.904245	1.11575
ebi-a-GCST90001637	ieu-b-85.vcf	CD4-CD8- Natural Killer T %T cell	6	0.00026086	0.0271884	0.992345	-0.0530284	0.0535501	1.00026	0.948353	1.05501
ebi-a-GCST90001637	ieu-b-85.vcf	CD4-CD8- Natural Killer T %T cell	6	0.00511762	0.0437349	0.911403	-0.0806028	0.090838	1.00513	0.92256	1.09509
ebi-a-GCST90001635	ieu-b-85.vcf	CD8dim Natural Killer T %lymphocyte	6	0.0116885	0.0217218	0.590507	-0.0308862	0.0542632	1.01176	0.969586	1.05576
ebi-a-GCST90001635	ieu-b-85.vcf	CD8dim Natural Killer T %lymphocyte	6	-0.0138664	0.0390438	0.740414	-0.0903923	0.0626595	0.986229	0.913573	1.06466
ebi-a-GCST90001635	ieu-b-85.vcf	CD8dim Natural Killer T %lymphocyte	6	0.0234259	0.0289574	0.418528	-0.0333307	0.0801825	1.0237	0.967219	1.08348
ebi-a-GCST90001635	ieu-b-85.vcf	CD8dim Natural Killer T %lymphocyte	6	0.0364834	0.04618	0.465313	-0.0540294	0.126996	1.03716	0.947404	1.13541
ebi-a-GCST90001634	ieu-b-85.vcf	CD8dim Natural Killer T %T cell	5	0.00649601	0.0229436	0.777077	-0.0384734	0.0514655	1.00652	0.962257	1.05281
ebi-a-GCST90001634	ieu-b-85.vcf	CD8dim Natural Killer T %T cell	5	-0.0403219	0.0863066	0.672201	-0.209483	0.128839	0.96048	0.811004	1.13751
ebi-a-GCST90001634	ieu-b-85.vcf	CD8dim Natural Killer T %T cell	5	0.0151558	0.0310349	0.625303	-0.0456725	0.0759841	1.01527	0.955355	1.07895
ebi-a-GCST90001634	ieu-b-85.vcf	CD8dim Natural Killer T %T cell	5	0.0278373	0.0508658	0.613294	-0.0718597	0.127534	1.02823	0.930661	1.13602
ebi-a-GCST90001633	ieu-b-85.vcf	CD8dim Natural Killer T Absolute Count	6	0.0119823	0.0227003	0.597606	-0.0325103	0.0564749	1.01205	0.968012	1.0581
ebi-a-GCST90001633	ieu-b-85.vcf	CD8dim Natural Killer T Absolute Count	6	-0.017681	0.0425902	0.69934	-0.101158	0.0657959	0.982474	0.90379	1.06801
ebi-a-GCST90001633	ieu-b-85.vcf	CD8dim Natural Killer T Absolute Count	6	0.0240815	0.0303964	0.428217	-0.0354955	0.0836584	1.02437	0.965127	1.08726
ebi-a-GCST90001633	ieu-b-85.vcf	CD8dim Natural Killer T Absolute Count	6	0.0351868	0.0543443	0.545872	-0.071328	0.141702	1.03581	0.931156	1.15223
ebi-a-GCST90001630	ieu-b-85.vcf	CD8+ Natural Killer T Absolute Count	2	-0.116502	0.0798501	0.144561	-0.273009	0.0400038	0.890028	0.761086	1.04081
ebi-a-GCST90001629	ieu-b-85.vcf	HLA DR+ CD8+ T cell %lymphocyte	3	0.00105725	0.0183265	0.953996	-0.0348627	0.0369771	1.00106	0.965738	1.03767
ebi-a-GCST90001629	ieu-b-85.vcf	HLA DR+ CD8+ T cell %lymphocyte	3	-0.0164742	0.0518535	0.804162	-0.118107	0.0851586	0.983661	0.888601	1.08889
ebi-a-GCST90001629	ieu-b-85.vcf	HLA DR+ CD8+ T cell %lymphocyte	3	0.000542628	0.0190246	0.977246	-0.0367457	0.0378309	1.00054	0.963921	1.03856
ebi-a-GCST90001629	ieu-b-85.vcf	HLA DR+ CD8+ T cell %lymphocyte	3	-0.000224052	0.0200494	0.992098	-0.0395209	0.0390728	0.999776	0.96125	1.03985
ebi-a-GCST90001628	ieu-b-85.vcf	HLA DR+ CD8+ T cell %T cell	4	0.00316257	0.0179444	0.860103	-0.0320084	0.0383336	1.00317	0.968498	1.03908
ebi-a-GCST90001628	ieu-b-85.vcf	HLA DR+ CD8+ T cell %T cell	4	-0.0157071	0.0378466	0.718411	-0.0898865	0.0584722	0.984416	0.914035	1.06022
ebi-a-GCST90001628	ieu-b-85.vcf	HLA DR+ CD8+ T cell %T cell	4	0.00149825	0.0189141	0.936863	-0.0355734	0.0385699	1.0015	0.965052	1.03932
ebi-a-GCST90001628	ieu-b-85.vcf	HLA DR+ CD8+ T cell %T cell	4	-0.000351643	0.0198664	0.986989	-0.0392899	0.0385866	0.999648	0.961472	1.03934
ebi-a-GCST90001627	ieu-b-85.vcf	HLA DR+ CD8+ T cell Absolute Count	4	0.00508875	0.0175245	0.771526	-0.0292592	0.0394367	1.0051	0.971165	1.04022
ebi-a-GCST90001627	ieu-b-85.vcf	HLA DR+ CD8+ T cell Absolute Count	4	-0.0240234	0.0441444	0.640864	-0.110546	0.0624995	0.976263	0.895345	1.06449
ebi-a-GCST90001627	ieu-b-85.vcf	HLA DR+ CD8+ T cell Absolute Count	4	0.0022004	0.0186536	0.906098	-0.0343606	0.0387614	1.0022	0.966223	1.03952
ebi-a-GCST90001627	ieu-b-85.vcf	HLA DR+ CD8+ T cell Absolute Count	4	0.000533571	0.0213742	0.981652	-0.0413598	0.0424269	1.00053	0.959484	1.04334
ebi-a-GCST90001626	ieu-b-85.vcf	HLA DR+ CD4+ T cell %lymphocyte	2	0.00520711	0.027557	0.850126	-0.0488046	0.0592188	1.00522	0.952367	1.06101
ebi-a-GCST90001624	ieu-b-85.vcf	HLA DR+ CD4+ T cell Absolute Count	2	0.00709405	0.028077	0.800528	-0.0479368	0.0621249	1.00712	0.953194	1.0641
ebi-a-GCST90001623	ieu-b-85.vcf	Natural Killer T %lymphocyte	8	0.0156074	0.0213916	0.465631	-0.0263201	0.0575349	1.01573	0.974023	1.05922
ebi-a-GCST90001623	ieu-b-85.vcf	Natural Killer T %lymphocyte	8	-0.000938649	0.0481426	0.985077	-0.0952981	0.0934208	0.999062	0.909102	1.09792
ebi-a-GCST90001623	ieu-b-85.vcf	Natural Killer T %lymphocyte	8	0.010057	0.0283191	0.722492	-0.0454485	0.0655625	1.01011	0.955569	1.06776
ebi-a-GCST90001623	ieu-b-85.vcf	Natural Killer T %lymphocyte	8	0.00784225	0.040377	0.851516	-0.0712967	0.0869812	1.00787	0.931186	1.09088
ebi-a-GCST90001622	ieu-b-85.vcf	Natural Killer T %T cell	7	-0.00290465	0.0223106	0.896415	-0.0466333	0.040824	0.9971	0.954437	1.04167
ebi-a-GCST90001622	ieu-b-85.vcf	Natural Killer T %T cell	7	0.0281025	0.0471215	0.576891	-0.0642556	0.120461	1.0285	0.937765	1.12802
ebi-a-GCST90001622	ieu-b-85.vcf	Natural Killer T %T cell	7	-5.65437e-05	0.0293298	0.998462	-0.057543	0.0574299	0.999943	0.944081	1.05911
ebi-a-GCST90001622	ieu-b-85.vcf	Natural Killer T %T cell	7	0.0113212	0.0465212	0.815837	-0.0798604	0.102503	1.01139	0.923245	1.10794
ebi-a-GCST90001621	ieu-b-85.vcf	Natural Killer T Absolute Count	5	-0.00919356	0.025511	0.718565	-0.059195	0.0408079	0.990849	0.942523	1.04165
ebi-a-GCST90001621	ieu-b-85.vcf	Natural Killer T Absolute Count	5	0.0345872	0.0589048	0.598354	-0.0808662	0.150041	1.03519	0.922317	1.16188
ebi-a-GCST90001621	ieu-b-85.vcf	Natural Killer T Absolute Count	5	-0.015894	0.0314825	0.613663	-0.0775998	0.0458118	0.984232	0.925335	1.04688
ebi-a-GCST90001621	ieu-b-85.vcf	Natural Killer T Absolute Count	5	-0.0156259	0.0459251	0.750788	-0.105639	0.0743872	0.984496	0.899749	1.07722
ebi-a-GCST90001620	ieu-b-85.vcf	HLA DR+ T cell%lymphocyte	5	-0.00320575	0.0159526	0.840734	-0.0344728	0.0280613	0.996799	0.966115	1.02846
ebi-a-GCST90001620	ieu-b-85.vcf	HLA DR+ T cell%lymphocyte	5	-0.0233193	0.0395014	0.596482	-0.100742	0.0541035	0.976951	0.904166	1.05559
ebi-a-GCST90001620	ieu-b-85.vcf	HLA DR+ T cell%lymphocyte	5	-0.00147538	0.0170808	0.931167	-0.0349537	0.032003	0.998526	0.96565	1.03252
ebi-a-GCST90001620	ieu-b-85.vcf	HLA DR+ T cell%lymphocyte	5	0.000144068	0.0186917	0.994219	-0.0364916	0.0367798	1.00014	0.964166	1.03746
ebi-a-GCST90001619	ieu-b-85.vcf	HLA DR+ T cell%T cell	4	0.0140819	0.0216385	0.51519	-0.0283296	0.0564934	1.01418	0.972068	1.05812
ebi-a-GCST90001619	ieu-b-85.vcf	HLA DR+ T cell%T cell	4	-0.022292	0.042908	0.65517	-0.106392	0.0618078	0.977955	0.899072	1.06376
ebi-a-GCST90001619	ieu-b-85.vcf	HLA DR+ T cell%T cell	4	0.0046364	0.019231	0.809486	-0.0330564	0.0423292	1.00465	0.967484	1.04324
ebi-a-GCST90001619	ieu-b-85.vcf	HLA DR+ T cell%T cell	4	-0.00172869	0.0201522	0.937044	-0.041227	0.0377696	0.998273	0.959611	1.03849
ebi-a-GCST90001618	ieu-b-85.vcf	HLA DR+ T cell Absolute Count	4	0.00283731	0.0159664	0.858954	-0.0284567	0.0341314	1.00284	0.971944	1.03472
ebi-a-GCST90001618	ieu-b-85.vcf	HLA DR+ T cell Absolute Count	4	-0.0269856	0.0447185	0.607529	-0.114634	0.0606626	0.973375	0.891693	1.06254
ebi-a-GCST90001618	ieu-b-85.vcf	HLA DR+ T cell Absolute Count	4	-0.000946947	0.0172768	0.95629	-0.0348095	0.0329156	0.999054	0.965789	1.03346
ebi-a-GCST90001618	ieu-b-85.vcf	HLA DR+ T cell Absolute Count	4	-0.00109565	0.0187093	0.956984	-0.0377659	0.0355746	0.998905	0.962938	1.03621
ebi-a-GCST90001614	ieu-b-85.vcf	CD8+ and CD8dim T cell %leukocyte	2	0.0865888	0.0760925	0.255145	-0.0625526	0.23573	1.09045	0.939364	1.26583
ebi-a-GCST90001613	ieu-b-85.vcf	CD4-CD8- T cell %leukocyte	3	-0.0666008	0.0358396	0.0631263	-0.136846	0.00364486	0.935569	0.872104	1.00365
ebi-a-GCST90001613	ieu-b-85.vcf	CD4-CD8- T cell %leukocyte	3	0.0223631	0.131815	0.893013	-0.235995	0.280721	1.02262	0.789785	1.32408
ebi-a-GCST90001613	ieu-b-85.vcf	CD4-CD8- T cell %leukocyte	3	-0.0613665	0.0378667	0.105105	-0.135585	0.0128522	0.940478	0.873205	1.01294
ebi-a-GCST90001613	ieu-b-85.vcf	CD4-CD8- T cell %leukocyte	3	-0.033437	0.0404096	0.494995	-0.11264	0.045766	0.967116	0.893472	1.04683
ebi-a-GCST90001611	ieu-b-85.vcf	CD4+ CD8dim T cell %leukocyte	3	-0.018033	0.0319739	0.57276	-0.0807018	0.0446358	0.982129	0.922469	1.04565
ebi-a-GCST90001611	ieu-b-85.vcf	CD4+ CD8dim T cell %leukocyte	3	0.163138	0.0986043	0.346108	-0.0301262	0.356403	1.1772	0.970323	1.42818
ebi-a-GCST90001611	ieu-b-85.vcf	CD4+ CD8dim T cell %leukocyte	3	0.00120793	0.0244578	0.96061	-0.0467294	0.0491453	1.00121	0.954346	1.05037
ebi-a-GCST90001611	ieu-b-85.vcf	CD4+ CD8dim T cell %leukocyte	3	0.00618366	0.025627	0.83181	-0.0440453	0.0564127	1.0062	0.956911	1.05803
ebi-a-GCST90001610	ieu-b-85.vcf	CD4+ CD8dim T cell %lymphocyte	2	0.00525396	0.0243694	0.829303	-0.0425102	0.0530181	1.00527	0.958381	1.05445
ebi-a-GCST90001609	ieu-b-85.vcf	CD4+ CD8dim T cell Absolute Count	3	-0.0189132	0.034684	0.585546	-0.0868938	0.0490673	0.981264	0.916774	1.05029
ebi-a-GCST90001609	ieu-b-85.vcf	CD4+ CD8dim T cell Absolute Count	3	0.147246	0.0984805	0.375281	-0.0457759	0.340268	1.15864	0.955256	1.40532
ebi-a-GCST90001609	ieu-b-85.vcf	CD4+ CD8dim T cell Absolute Count	3	0.00165419	0.0263077	0.949863	-0.049909	0.0532174	1.00166	0.951316	1.05466
ebi-a-GCST90001609	ieu-b-85.vcf	CD4+ CD8dim T cell Absolute Count	3	0.00691234	0.0298787	0.838559	-0.0516499	0.0654746	1.00694	0.949661	1.06767
ebi-a-GCST90001604	ieu-b-85.vcf	T cell %lymphocyte	2	0.0181745	0.0314979	0.563936	-0.0435614	0.0799104	1.01834	0.957374	1.08319
ebi-a-GCST90001603	ieu-b-85.vcf	T cell Absolute Count	2	-0.101665	0.0357625	0.00447232	-0.171759	-0.0315701	0.903332	0.842182	0.968923
ebi-a-GCST90001601	ieu-b-85.vcf	Lymphocyte Absolute Count	2	-0.111095	0.0369514	0.00264257	-0.18352	-0.0386703	0.894854	0.832336	0.962068
ebi-a-GCST90001599	ieu-b-85.vcf	CD4-CD8- T cell %T cell	2	-0.0380079	0.0351529	0.279601	-0.106908	0.0308918	0.962705	0.898609	1.03137
ebi-a-GCST90001598	ieu-b-85.vcf	CD4-CD8- T cell Absolute Count	2	-0.0657752	0.0560706	0.240764	-0.175674	0.0441232	0.936341	0.838892	1.04511
ebi-a-GCST90001596	ieu-b-85.vcf	CD8dim T cell Absolute Count	2	-0.0514035	0.042076	0.221828	-0.133872	0.0310655	0.949895	0.874702	1.03155
ebi-a-GCST90001594	ieu-b-85.vcf	CD4+CD8+ T cell Absolute Count	2	0.0104369	0.0283678	0.712939	-0.045164	0.0660377	1.01049	0.955841	1.06827
ebi-a-GCST90001588	ieu-b-85.vcf	T/B cell	2	0.0304443	0.0460245	0.508304	-0.0597637	0.120652	1.03091	0.941987	1.12823
ebi-a-GCST90001587	ieu-b-85.vcf	CD16+ monocyte %monocyte	2	0.0335056	0.0571139	0.557442	-0.0784376	0.145449	1.03407	0.92456	1.15656
ebi-a-GCST90001586	ieu-b-85.vcf	CD14+ CD16- monocyte %monocyte	2	-0.0327409	0.0564695	0.562051	-0.143421	0.0779393	0.967789	0.866389	1.08106
ebi-a-GCST90001585	ieu-b-85.vcf	CD14+ CD16+ monocyte %monocyte	3	0.0181721	0.0183798	0.32281	-0.0178523	0.0541964	1.01834	0.982306	1.05569
ebi-a-GCST90001585	ieu-b-85.vcf	CD14+ CD16+ monocyte %monocyte	3	0.0503425	0.0297801	0.340072	-0.00802656	0.108712	1.05163	0.992006	1.11484
ebi-a-GCST90001585	ieu-b-85.vcf	CD14+ CD16+ monocyte %monocyte	3	0.0202512	0.0185394	0.274687	-0.0160861	0.0565885	1.02046	0.984043	1.05822
ebi-a-GCST90001585	ieu-b-85.vcf	CD14+ CD16+ monocyte %monocyte	3	0.0274636	0.0190938	0.286936	-0.00996031	0.0648874	1.02784	0.990089	1.06704
ebi-a-GCST90001584	ieu-b-85.vcf	CD14- CD16+ monocyte %monocyte	2	0.0497579	0.035928	0.166072	-0.0206608	0.120177	1.05102	0.979551	1.1277
ebi-a-GCST90001582	ieu-b-85.vcf	CD14+ CD16- monocyte Absolute Count	2	-0.0314423	0.051579	0.54213	-0.132537	0.0696525	0.969047	0.87587	1.07214
ebi-a-GCST90001581	ieu-b-85.vcf	CD14- CD16- Absolute Count	2	-0.0505191	0.0383069	0.187237	-0.125601	0.0245625	0.950736	0.881967	1.02487
ebi-a-GCST90001580	ieu-b-85.vcf	CD14+ CD16+ monocyte Absolute Count	3	0.0190902	0.0200407	0.340809	-0.0201897	0.05837	1.01927	0.980013	1.06011
ebi-a-GCST90001580	ieu-b-85.vcf	CD14+ CD16+ monocyte Absolute Count	3	0.0574619	0.0334717	0.335788	-0.00814258	0.123066	1.05914	0.99189	1.13096
ebi-a-GCST90001580	ieu-b-85.vcf	CD14+ CD16+ monocyte Absolute Count	3	0.0222716	0.0202487	0.271376	-0.0174159	0.061959	1.02252	0.982735	1.06392
ebi-a-GCST90001580	ieu-b-85.vcf	CD14+ CD16+ monocyte Absolute Count	3	0.0299786	0.0204212	0.27982	-0.010047	0.0700042	1.03043	0.990003	1.07251
ebi-a-GCST90001574	ieu-b-85.vcf	Terminally Differentiated CD4-CD8- T cell %T cell	3	-0.0169324	0.0251257	0.50037	-0.0661788	0.032314	0.98321	0.935964	1.03284
ebi-a-GCST90001574	ieu-b-85.vcf	Terminally Differentiated CD4-CD8- T cell %T cell	3	-0.0397421	0.0383517	0.488667	-0.114911	0.0354273	0.961037	0.891445	1.03606
ebi-a-GCST90001574	ieu-b-85.vcf	Terminally Differentiated CD4-CD8- T cell %T cell	3	-0.0289282	0.0241223	0.230438	-0.0762078	0.0183515	0.971486	0.926624	1.01852
ebi-a-GCST90001574	ieu-b-85.vcf	Terminally Differentiated CD4-CD8- T cell %T cell	3	-0.0307033	0.0240759	0.330316	-0.077892	0.0164854	0.969763	0.925064	1.01662
ebi-a-GCST90001573	ieu-b-85.vcf	Terminally Differentiated CD4-CD8- T cell %CD4-CD8- T cell	2	-0.030415	0.0226507	0.179342	-0.0748103	0.0139804	0.970043	0.927919	1.01408
ebi-a-GCST90001571	ieu-b-85.vcf	Effector Memory CD4-CD8- T cell %T cell	3	0.000650502	0.0367994	0.985897	-0.0714763	0.0727773	1.00065	0.931018	1.07549
ebi-a-GCST90001571	ieu-b-85.vcf	Effector Memory CD4-CD8- T cell %T cell	3	0.0544666	0.122173	0.733021	-0.184992	0.293925	1.05598	0.831111	1.34168
ebi-a-GCST90001571	ieu-b-85.vcf	Effector Memory CD4-CD8- T cell %T cell	3	0.000985443	0.0406742	0.980671	-0.078736	0.0807069	1.00099	0.924284	1.08405
ebi-a-GCST90001571	ieu-b-85.vcf	Effector Memory CD4-CD8- T cell %T cell	3	-0.00871018	0.0468903	0.869769	-0.100615	0.0831949	0.991328	0.904281	1.08675
ebi-a-GCST90001570	ieu-b-85.vcf	Effector Memory CD4-CD8- T cell %CD4-CD8- T cell	4	0.0206496	0.0160743	0.198921	-0.0108561	0.0521552	1.02086	0.989203	1.05354
ebi-a-GCST90001570	ieu-b-85.vcf	Effector Memory CD4-CD8- T cell %CD4-CD8- T cell	4	0.00254535	0.0290842	0.938235	-0.0544597	0.0595504	1.00255	0.946997	1.06136
ebi-a-GCST90001570	ieu-b-85.vcf	Effector Memory CD4-CD8- T cell %CD4-CD8- T cell	4	0.0195187	0.0168209	0.245893	-0.0134503	0.0524877	1.01971	0.98664	1.05389
ebi-a-GCST90001570	ieu-b-85.vcf	Effector Memory CD4-CD8- T cell %CD4-CD8- T cell	4	0.0212035	0.0173913	0.309885	-0.0128835	0.0552905	1.02143	0.987199	1.05685
ebi-a-GCST90001569	ieu-b-85.vcf	Effector Memory CD4-CD8- T cell Absolute Count	3	-0.0440747	0.0413471	0.286438	-0.125115	0.0369656	0.956882	0.882395	1.03766
ebi-a-GCST90001569	ieu-b-85.vcf	Effector Memory CD4-CD8- T cell Absolute Count	3	0.0697825	0.0782428	0.536346	-0.0835734	0.223138	1.07227	0.919824	1.24999
ebi-a-GCST90001569	ieu-b-85.vcf	Effector Memory CD4-CD8- T cell Absolute Count	3	-0.0206987	0.0420848	0.622838	-0.103185	0.0617875	0.979514	0.90196	1.06374
ebi-a-GCST90001569	ieu-b-85.vcf	Effector Memory CD4-CD8- T cell Absolute Count	3	-0.00566118	0.0516061	0.922663	-0.106809	0.0954868	0.994355	0.898697	1.10019
ebi-a-GCST90001562	ieu-b-85.vcf	CD45RA+ CD8+ T cell %T cell	2	-0.0343004	0.0246089	0.163372	-0.0825339	0.0139331	0.966281	0.92078	1.01403
ebi-a-GCST90001561	ieu-b-85.vcf	CD45RA+ CD8+ T cell %CD8+ T cell	5	0.00218303	0.0112789	0.846528	-0.0199236	0.0242897	1.00219	0.980274	1.02459
ebi-a-GCST90001561	ieu-b-85.vcf	CD45RA+ CD8+ T cell %CD8+ T cell	5	0.0141715	0.00983841	0.24538	-0.00511177	0.0334548	1.01427	0.994901	1.03402
ebi-a-GCST90001561	ieu-b-85.vcf	CD45RA+ CD8+ T cell %CD8+ T cell	5	0.00461312	0.00993519	0.642417	-0.0148598	0.0240861	1.00462	0.98525	1.02438
ebi-a-GCST90001561	ieu-b-85.vcf	CD45RA+ CD8+ T cell %CD8+ T cell	5	0.00996573	0.00998802	0.37486	-0.00961079	0.0295423	1.01002	0.990435	1.02998
ebi-a-GCST90001560	ieu-b-85.vcf	CD45RA+ CD8+ T cell Absolute Count	3	-0.0986896	0.0447726	0.0275076	-0.186444	-0.0109352	0.906024	0.829905	0.989124
ebi-a-GCST90001560	ieu-b-85.vcf	CD45RA+ CD8+ T cell Absolute Count	3	0.342215	0.682234	0.704014	-0.994963	1.67939	1.40806	0.369737	5.3623
ebi-a-GCST90001560	ieu-b-85.vcf	CD45RA+ CD8+ T cell Absolute Count	3	-0.0778555	0.0385044	0.0431776	-0.153324	-0.00238681	0.925098	0.857852	0.997616
ebi-a-GCST90001560	ieu-b-85.vcf	CD45RA+ CD8+ T cell Absolute Count	3	-0.0733783	0.042401	0.225667	-0.156484	0.00972774	0.929249	0.855145	1.00978
ebi-a-GCST90001559	ieu-b-85.vcf	Terminally Differentiated CD8+ T cell %T cell	2	-0.032143	0.0219542	0.143168	-0.0751731	0.0108872	0.968368	0.927583	1.01095
ebi-a-GCST90001558	ieu-b-85.vcf	Terminally Differentiated CD8+ T cell %CD8+ T cell	3	-0.0195299	0.0206881	0.34516	-0.0600786	0.0210187	0.98066	0.941691	1.02124
ebi-a-GCST90001558	ieu-b-85.vcf	Terminally Differentiated CD8+ T cell %CD8+ T cell	3	-0.0151181	0.0384804	0.761681	-0.0905397	0.0603036	0.984996	0.913438	1.06216
ebi-a-GCST90001558	ieu-b-85.vcf	Terminally Differentiated CD8+ T cell %CD8+ T cell	3	-0.0226003	0.0187267	0.227489	-0.0593046	0.0141039	0.977653	0.94242	1.0142
ebi-a-GCST90001558	ieu-b-85.vcf	Terminally Differentiated CD8+ T cell %CD8+ T cell	3	-0.0231674	0.0186888	0.340833	-0.0597974	0.0134627	0.977099	0.941955	1.01355
ebi-a-GCST90001555	ieu-b-85.vcf	Effector Memory CD8+ T cell %CD8+ T cell	4	0.0210175	0.0131735	0.110613	-0.00480247	0.0468375	1.02124	0.995209	1.04795
ebi-a-GCST90001555	ieu-b-85.vcf	Effector Memory CD8+ T cell %CD8+ T cell	4	0.00665805	0.0173932	0.738724	-0.0274326	0.0407487	1.00668	0.97294	1.04159
ebi-a-GCST90001555	ieu-b-85.vcf	Effector Memory CD8+ T cell %CD8+ T cell	4	0.0161066	0.0145844	0.269431	-0.0124788	0.0446921	1.01624	0.987599	1.04571
ebi-a-GCST90001555	ieu-b-85.vcf	Effector Memory CD8+ T cell %CD8+ T cell	4	0.0127505	0.0161888	0.488416	-0.0189794	0.0444805	1.01283	0.9812	1.04548
ebi-a-GCST90001553	ieu-b-85.vcf	Naive CD8+ T cell %T cell	3	-0.00800512	0.00306558	0.00902008	-0.0140137	-0.00199659	0.992027	0.986084	0.998005
ebi-a-GCST90001553	ieu-b-85.vcf	Naive CD8+ T cell %T cell	3	-0.00767725	0.00318683	0.250482	-0.0139235	-0.00143106	0.992352	0.986173	0.99857
ebi-a-GCST90001553	ieu-b-85.vcf	Naive CD8+ T cell %T cell	3	-0.00801519	0.00359951	0.0259645	-0.0150702	-0.000960142	0.992017	0.985043	0.99904
ebi-a-GCST90001553	ieu-b-85.vcf	Naive CD8+ T cell %T cell	3	-0.00790311	0.00340503	0.146035	-0.014577	-0.00122924	0.992128	0.985529	0.998772
ebi-a-GCST90001551	ieu-b-85.vcf	Naive CD8+ T cell Absolute Count	2	-0.0678611	0.0481185	0.158454	-0.162173	0.0264511	0.93439	0.850294	1.0268
ebi-a-GCST90001547	ieu-b-85.vcf	Terminally Differentiated CD4+ T cell %T cell	5	-0.0188333	0.0386512	0.626073	-0.0945896	0.0569231	0.981343	0.909746	1.05857
ebi-a-GCST90001547	ieu-b-85.vcf	Terminally Differentiated CD4+ T cell %T cell	5	0.00988148	0.0753293	0.903938	-0.137764	0.157527	1.00993	0.871304	1.17061
ebi-a-GCST90001547	ieu-b-85.vcf	Terminally Differentiated CD4+ T cell %T cell	5	-0.00792124	0.0210042	0.70608	-0.0490895	0.0332471	0.99211	0.952096	1.03381
ebi-a-GCST90001547	ieu-b-85.vcf	Terminally Differentiated CD4+ T cell %T cell	5	-0.00225946	0.0200373	0.915651	-0.0415327	0.0370137	0.997743	0.959318	1.03771
ebi-a-GCST90001546	ieu-b-85.vcf	Terminally Differentiated CD4+ T cell %CD4+ T cell	4	-0.0171439	0.0332491	0.606119	-0.0823121	0.0480243	0.983002	0.920984	1.0492
ebi-a-GCST90001546	ieu-b-85.vcf	Terminally Differentiated CD4+ T cell %CD4+ T cell	4	-0.0461346	0.0710751	0.582859	-0.185442	0.0931725	0.954913	0.830737	1.09765
ebi-a-GCST90001546	ieu-b-85.vcf	Terminally Differentiated CD4+ T cell %CD4+ T cell	4	-0.0267092	0.0244452	0.274564	-0.0746218	0.0212035	0.973644	0.928094	1.02143
ebi-a-GCST90001546	ieu-b-85.vcf	Terminally Differentiated CD4+ T cell %CD4+ T cell	4	-0.0273823	0.0256399	0.363845	-0.0776364	0.0228718	0.972989	0.925301	1.02314
ebi-a-GCST90001544	ieu-b-85.vcf	Effector Memory CD4+ T cell %T cell	4	0.0184962	0.0258982	0.47511	-0.0322643	0.0692566	1.01867	0.968251	1.07171
ebi-a-GCST90001544	ieu-b-85.vcf	Effector Memory CD4+ T cell %T cell	4	0.0258794	0.0442488	0.617832	-0.0608482	0.112607	1.02622	0.940966	1.11919
ebi-a-GCST90001544	ieu-b-85.vcf	Effector Memory CD4+ T cell %T cell	4	0.0252683	0.0214268	0.238284	-0.0167282	0.0672647	1.02559	0.983411	1.06958
ebi-a-GCST90001544	ieu-b-85.vcf	Effector Memory CD4+ T cell %T cell	4	0.0274954	0.0220993	0.301787	-0.0158193	0.07081	1.02788	0.984305	1.07338
ebi-a-GCST90001543	ieu-b-85.vcf	Effector Memory CD4+ T cell %CD4+ T cell	2	0.0202205	0.0221132	0.360502	-0.0231214	0.0635624	1.02043	0.977144	1.06563
ebi-a-GCST90001541	ieu-b-85.vcf	Naive CD4+ T cell %CD4+ T cell	4	-0.0298596	0.0296843	0.314462	-0.0880408	0.0283217	0.970582	0.915723	1.02873
ebi-a-GCST90001541	ieu-b-85.vcf	Naive CD4+ T cell %CD4+ T cell	4	-0.0190307	0.0525221	0.751805	-0.121974	0.0839125	0.981149	0.885171	1.08753
ebi-a-GCST90001541	ieu-b-85.vcf	Naive CD4+ T cell %CD4+ T cell	4	-0.034529	0.0230123	0.133497	-0.0796331	0.0105752	0.96606	0.923455	1.01063
ebi-a-GCST90001541	ieu-b-85.vcf	Naive CD4+ T cell %CD4+ T cell	4	-0.0345881	0.0250008	0.260492	-0.0835896	0.0144135	0.966003	0.919809	1.01452
ebi-a-GCST90001536	ieu-b-85.vcf	CD45RA- CD4+ T cell %T cell	2	0.0252676	0.0243319	0.299059	-0.022423	0.0729582	1.02559	0.977826	1.07569
ebi-a-GCST90001535	ieu-b-85.vcf	CD45RA- CD4+ T cell %CD4+ T cell	4	0.00976164	0.0140231	0.486357	-0.0177235	0.0372468	1.00981	0.982433	1.03795
ebi-a-GCST90001535	ieu-b-85.vcf	CD45RA- CD4+ T cell %CD4+ T cell	4	0.00413934	0.0200527	0.855567	-0.035164	0.0434427	1.00415	0.965447	1.0444
ebi-a-GCST90001535	ieu-b-85.vcf	CD45RA- CD4+ T cell %CD4+ T cell	4	0.00245687	0.0150369	0.870212	-0.0270155	0.0319292	1.00246	0.973346	1.03244
ebi-a-GCST90001535	ieu-b-85.vcf	CD45RA- CD4+ T cell %CD4+ T cell	4	0.0104353	0.0162657	0.566817	-0.0214456	0.0423161	1.01049	0.978783	1.04322
ebi-a-GCST90001534	ieu-b-85.vcf	CD45RA- CD4+ T cell Absolute Count	2	0.00240329	0.0439665	0.956408	-0.083771	0.0885776	1.00241	0.919642	1.09262
ebi-a-GCST90001533	ieu-b-85.vcf	Basophil %CD33dim HLA DR- CD66b-	3	-0.0288442	0.0143714	0.0447429	-0.0570121	-0.000676369	0.971568	0.944583	0.999324
ebi-a-GCST90001533	ieu-b-85.vcf	Basophil %CD33dim HLA DR- CD66b-	3	-0.0243617	0.0453474	0.686159	-0.113243	0.0645193	0.975933	0.892934	1.06665
ebi-a-GCST90001533	ieu-b-85.vcf	Basophil %CD33dim HLA DR- CD66b-	3	-0.028119	0.0153904	0.0676925	-0.0582842	0.00204618	0.972273	0.943382	1.00205
ebi-a-GCST90001533	ieu-b-85.vcf	Basophil %CD33dim HLA DR- CD66b-	3	-0.0273675	0.0157815	0.225028	-0.0582992	0.00356424	0.973004	0.943368	1.00357
ebi-a-GCST90001532	ieu-b-85.vcf	Basophil Absolute Count	3	-0.0108737	0.00949831	0.252289	-0.0294904	0.00774296	0.989185	0.97094	1.00777
ebi-a-GCST90001532	ieu-b-85.vcf	Basophil Absolute Count	3	-0.00312136	0.0199436	0.901165	-0.0422109	0.0359682	0.996884	0.958668	1.03662
ebi-a-GCST90001532	ieu-b-85.vcf	Basophil Absolute Count	3	-0.0111621	0.0104712	0.286431	-0.0316857	0.00936142	0.9889	0.968811	1.00941
ebi-a-GCST90001532	ieu-b-85.vcf	Basophil Absolute Count	3	-0.00945198	0.0123761	0.524826	-0.0337092	0.0148052	0.990593	0.966853	1.01492
ebi-a-GCST90001531	ieu-b-85.vcf	CD33dim HLA DR- Absolute Count	3	-0.0100984	0.00955261	0.290449	-0.0288215	0.0086247	0.989952	0.97159	1.00866
ebi-a-GCST90001531	ieu-b-85.vcf	CD33dim HLA DR- Absolute Count	3	-0.00321761	0.0189751	0.893066	-0.0404088	0.0339736	0.996788	0.960397	1.03456
ebi-a-GCST90001531	ieu-b-85.vcf	CD33dim HLA DR- Absolute Count	3	-0.0104412	0.0110005	0.342542	-0.0320022	0.0111198	0.989613	0.968504	1.01118
ebi-a-GCST90001531	ieu-b-85.vcf	CD33dim HLA DR- Absolute Count	3	-0.0093953	0.0115356	0.500936	-0.0320051	0.0132145	0.990649	0.968502	1.0133
ebi-a-GCST90001530	ieu-b-85.vcf	Monocytic Myeloid-Derived Suppressor Cells Absolute Count	2	-0.00500607	0.0739335	0.946016	-0.149916	0.139904	0.995006	0.860781	1.15016
ebi-a-GCST90001528	ieu-b-85.vcf	CD33dim HLA DR+ CD11b- %CD33dim HLA DR+	3	0.0205358	0.0121009	0.0896874	-0.00318194	0.0442535	1.02075	0.996823	1.04525
ebi-a-GCST90001528	ieu-b-85.vcf	CD33dim HLA DR+ CD11b- %CD33dim HLA DR+	3	-0.0412548	0.0627441	0.629719	-0.164233	0.0817235	0.959585	0.848544	1.08516
ebi-a-GCST90001528	ieu-b-85.vcf	CD33dim HLA DR+ CD11b- %CD33dim HLA DR+	3	0.0166079	0.0129933	0.201182	-0.00885894	0.0420748	1.01675	0.99118	1.04297
ebi-a-GCST90001528	ieu-b-85.vcf	CD33dim HLA DR+ CD11b- %CD33dim HLA DR+	3	0.0136386	0.0138306	0.428028	-0.0134693	0.0407465	1.01373	0.986621	1.04159
ebi-a-GCST90001527	ieu-b-85.vcf	CD33dim HLA DR+ CD11b- Absolute Count	2	0.0553348	0.0261065	0.0340417	0.00416599	0.106504	1.05689	1.00417	1.11238
ebi-a-GCST90001526	ieu-b-85.vcf	CD33dim HLA DR+ CD11b+ %CD33dim HLA DR+	3	-0.0205607	0.0120531	0.0880385	-0.0441848	0.00306346	0.979649	0.956777	1.00307
ebi-a-GCST90001526	ieu-b-85.vcf	CD33dim HLA DR+ CD11b+ %CD33dim HLA DR+	3	0.042532	0.0651389	0.631753	-0.0851403	0.170204	1.04345	0.918383	1.18555
ebi-a-GCST90001526	ieu-b-85.vcf	CD33dim HLA DR+ CD11b+ %CD33dim HLA DR+	3	-0.0167931	0.0132832	0.206147	-0.0428283	0.00924208	0.983347	0.958076	1.00928
ebi-a-GCST90001526	ieu-b-85.vcf	CD33dim HLA DR+ CD11b+ %CD33dim HLA DR+	3	-0.0136355	0.0147478	0.45279	-0.0425411	0.0152701	0.986457	0.958351	1.01539
ebi-a-GCST90001524	ieu-b-85.vcf	Granulocytic Myeloid-Derived Suppressor Cells Absolute Count	2	-0.0554269	0.0275739	0.0444185	-0.109472	-0.001382	0.946081	0.896307	0.998619
ebi-a-GCST90001520	ieu-b-85.vcf	CD33+ HLA DR+ CD14dim Absolute Count	2	-0.0248219	0.0375521	0.508613	-0.098424	0.0487802	0.975484	0.906265	1.04999
ebi-a-GCST90001516	ieu-b-85.vcf	Immature Myeloid-Derived Suppressor Cells %CD33dim HLA DR- CD66b-	2	-0.0176534	0.0341209	0.604893	-0.0845304	0.0492236	0.982502	0.918944	1.05046
ebi-a-GCST90001515	ieu-b-85.vcf	Immature Myeloid-Derived Suppressor Cells Absolute Count	2	-0.02391	0.0208853	0.252283	-0.0648452	0.0170252	0.976374	0.937213	1.01717
ebi-a-GCST90001514	ieu-b-85.vcf	Hematopoietic Stem Cell Absolute Count	2	0.00497872	0.0176756	0.778195	-0.0296655	0.0396229	1.00499	0.97077	1.04042
ebi-a-GCST90001512	ieu-b-85.vcf	CD25++ CD45RA- CD4 not regulatory T cell %T cell	3	-0.00943094	0.0131507	0.473286	-0.0352063	0.0163444	0.990613	0.965406	1.01648
ebi-a-GCST90001512	ieu-b-85.vcf	CD25++ CD45RA- CD4 not regulatory T cell %T cell	3	0.0365037	0.0360075	0.495643	-0.0340709	0.107078	1.03718	0.966503	1.11302
ebi-a-GCST90001512	ieu-b-85.vcf	CD25++ CD45RA- CD4 not regulatory T cell %T cell	3	-0.00801183	0.0162743	0.622508	-0.0399095	0.0238858	0.99202	0.960876	1.02417
ebi-a-GCST90001512	ieu-b-85.vcf	CD25++ CD45RA- CD4 not regulatory T cell %T cell	3	-0.00550402	0.0193782	0.803091	-0.0434853	0.0324772	0.994511	0.957447	1.03301
ebi-a-GCST90001511	ieu-b-85.vcf	CD25++ CD45RA- CD4 not regulatory T cell %CD4+ T cell	3	-0.00490828	0.0138618	0.723274	-0.0320775	0.0222609	0.995104	0.968432	1.02251
ebi-a-GCST90001511	ieu-b-85.vcf	CD25++ CD45RA- CD4 not regulatory T cell %CD4+ T cell	3	0.030741	0.0282917	0.473601	-0.0247107	0.0861927	1.03122	0.975592	1.09002
ebi-a-GCST90001511	ieu-b-85.vcf	CD25++ CD45RA- CD4 not regulatory T cell %CD4+ T cell	3	-0.00400987	0.0136309	0.768624	-0.0307265	0.0227067	0.995998	0.969741	1.02297
ebi-a-GCST90001511	ieu-b-85.vcf	CD25++ CD45RA- CD4 not regulatory T cell %CD4+ T cell	3	0.00720558	0.0176578	0.722763	-0.0274037	0.0418149	1.00723	0.972968	1.0427
ebi-a-GCST90001510	ieu-b-85.vcf	CD25++ CD45RA- CD4 not regulatory T cell Absolute Count	2	0.00345981	0.0296581	0.907132	-0.05467	0.0615896	1.00347	0.946798	1.06353
ebi-a-GCST90001509	ieu-b-85.vcf	CD25++ CD45RA+ CD4 not regulatory T cell %T cell	4	0.00330752	0.020087	0.869212	-0.036063	0.042678	1.00331	0.96458	1.0436
ebi-a-GCST90001509	ieu-b-85.vcf	CD25++ CD45RA+ CD4 not regulatory T cell %T cell	4	-0.0209506	0.0244729	0.482152	-0.0689175	0.0270163	0.979267	0.933404	1.02738
ebi-a-GCST90001509	ieu-b-85.vcf	CD25++ CD45RA+ CD4 not regulatory T cell %T cell	4	-0.00715602	0.0193111	0.710961	-0.0450057	0.0306937	0.99287	0.955992	1.03117
ebi-a-GCST90001509	ieu-b-85.vcf	CD25++ CD45RA+ CD4 not regulatory T cell %T cell	4	-0.00858945	0.0199849	0.696345	-0.0477599	0.030581	0.991447	0.953363	1.03105
ebi-a-GCST90001508	ieu-b-85.vcf	CD25++ CD45RA+ CD4 not regulatory T cell %CD4+ T cell	4	0.0033921	0.0191523	0.85942	-0.0341464	0.0409306	1.0034	0.96643	1.04178
ebi-a-GCST90001508	ieu-b-85.vcf	CD25++ CD45RA+ CD4 not regulatory T cell %CD4+ T cell	4	-0.0207265	0.0236121	0.472637	-0.0670062	0.0255533	0.979487	0.935189	1.02588
ebi-a-GCST90001508	ieu-b-85.vcf	CD25++ CD45RA+ CD4 not regulatory T cell %CD4+ T cell	4	-0.00662728	0.0183489	0.717964	-0.0425911	0.0293365	0.993395	0.958303	1.02977
ebi-a-GCST90001508	ieu-b-85.vcf	CD25++ CD45RA+ CD4 not regulatory T cell %CD4+ T cell	4	-0.00800174	0.0204911	0.722245	-0.0481642	0.0321607	0.99203	0.952977	1.03268
ebi-a-GCST90001507	ieu-b-85.vcf	CD25++ CD45RA+ CD4 not regulatory T cell Absolute Count	3	-0.0183548	0.0196605	0.350516	-0.0568895	0.0201798	0.981813	0.944698	1.02038
ebi-a-GCST90001507	ieu-b-85.vcf	CD25++ CD45RA+ CD4 not regulatory T cell Absolute Count	3	-0.00922912	0.0375355	0.846514	-0.0827986	0.0643404	0.990813	0.920537	1.06646
ebi-a-GCST90001507	ieu-b-85.vcf	CD25++ CD45RA+ CD4 not regulatory T cell Absolute Count	3	-0.00815882	0.022339	0.714941	-0.0519432	0.0356256	0.991874	0.949383	1.03627
ebi-a-GCST90001507	ieu-b-85.vcf	CD25++ CD45RA+ CD4 not regulatory T cell Absolute Count	3	-0.00655475	0.0244722	0.813913	-0.0545202	0.0414107	0.993467	0.946939	1.04228
ebi-a-GCST90001505	ieu-b-85.vcf	CD25++ CD4+ T cell %CD4+ T cell	2	-0.0418421	0.0240891	0.0823917	-0.0890567	0.00537248	0.959021	0.914794	1.00539
ebi-a-GCST90001503	ieu-b-85.vcf	Activated & secreting CD4 regulatory T cell %CD4+ T cell	9	0.00197809	0.0112315	0.860199	-0.0200356	0.0239917	1.00198	0.980164	1.02428
ebi-a-GCST90001503	ieu-b-85.vcf	Activated & secreting CD4 regulatory T cell %CD4+ T cell	9	0.0124885	0.013192	0.375332	-0.0133679	0.0383448	1.01257	0.986721	1.03909
ebi-a-GCST90001503	ieu-b-85.vcf	Activated & secreting CD4 regulatory T cell %CD4+ T cell	9	0.0165426	0.00984363	0.0928527	-0.00275092	0.0358361	1.01668	0.997253	1.03649
ebi-a-GCST90001503	ieu-b-85.vcf	Activated & secreting CD4 regulatory T cell %CD4+ T cell	9	0.0107877	0.00924655	0.276939	-0.0073355	0.028911	1.01085	0.992691	1.02933
ebi-a-GCST90001502	ieu-b-85.vcf	Activated & secreting CD4 regulatory T cell %CD4 regulatory T cell	7	0.0013008	0.00745142	0.861417	-0.013304	0.0159056	1.0013	0.986784	1.01603
ebi-a-GCST90001502	ieu-b-85.vcf	Activated & secreting CD4 regulatory T cell %CD4 regulatory T cell	7	-0.00113537	0.00986544	0.912856	-0.0204716	0.0182009	0.998865	0.979736	1.01837
ebi-a-GCST90001502	ieu-b-85.vcf	Activated & secreting CD4 regulatory T cell %CD4 regulatory T cell	7	-0.00492649	0.00960627	0.608062	-0.0237548	0.0139018	0.995086	0.976525	1.014
ebi-a-GCST90001502	ieu-b-85.vcf	Activated & secreting CD4 regulatory T cell %CD4 regulatory T cell	7	0.0110303	0.0104604	0.33226	-0.009472	0.0315327	1.01109	0.990573	1.03204
ebi-a-GCST90001501	ieu-b-85.vcf	Activated & secreting CD4 regulatory T cell Absolute Count	4	-0.00435709	0.014908	0.770084	-0.0335768	0.0248626	0.995652	0.966981	1.02517
ebi-a-GCST90001501	ieu-b-85.vcf	Activated & secreting CD4 regulatory T cell Absolute Count	4	0.0192467	0.0228836	0.488841	-0.0256052	0.0640986	1.01943	0.97472	1.0662
ebi-a-GCST90001501	ieu-b-85.vcf	Activated & secreting CD4 regulatory T cell Absolute Count	4	-0.00190784	0.0133659	0.886496	-0.028105	0.0242893	0.998094	0.972286	1.02459
ebi-a-GCST90001501	ieu-b-85.vcf	Activated & secreting CD4 regulatory T cell Absolute Count	4	0.00387564	0.0158089	0.822149	-0.0271097	0.034861	1.00388	0.973254	1.03548
ebi-a-GCST90001500	ieu-b-85.vcf	Activated & resting CD4 regulatory T cell %CD4+ T cell	3	-0.00973682	0.0142656	0.494899	-0.0376974	0.0182238	0.99031	0.963004	1.01839
ebi-a-GCST90001500	ieu-b-85.vcf	Activated & resting CD4 regulatory T cell %CD4+ T cell	3	-0.00432244	0.0182772	0.85216	-0.0401458	0.0315009	0.995687	0.960649	1.032
ebi-a-GCST90001500	ieu-b-85.vcf	Activated & resting CD4 regulatory T cell %CD4+ T cell	3	-0.009814	0.0146888	0.504052	-0.0386041	0.0189761	0.990234	0.962132	1.01916
ebi-a-GCST90001500	ieu-b-85.vcf	Activated & resting CD4 regulatory T cell %CD4+ T cell	3	-0.00667128	0.0150048	0.700085	-0.0360806	0.022738	0.993351	0.964563	1.023
ebi-a-GCST90001499	ieu-b-85.vcf	Activated & resting CD4 regulatory T cell %CD4 regulatory T cell	5	-0.00649118	0.00812497	0.424338	-0.0224161	0.00943375	0.99353	0.977833	1.00948
ebi-a-GCST90001499	ieu-b-85.vcf	Activated & resting CD4 regulatory T cell %CD4 regulatory T cell	5	-0.00485058	0.0105892	0.678046	-0.0256055	0.0159043	0.995161	0.97472	1.01603
ebi-a-GCST90001499	ieu-b-85.vcf	Activated & resting CD4 regulatory T cell %CD4 regulatory T cell	5	-0.00660358	0.0101535	0.515449	-0.0265044	0.0132972	0.993418	0.973844	1.01339
ebi-a-GCST90001499	ieu-b-85.vcf	Activated & resting CD4 regulatory T cell %CD4 regulatory T cell	5	-0.0166401	0.0115201	0.22212	-0.0392195	0.00593942	0.983498	0.96154	1.00596
ebi-a-GCST90001497	ieu-b-85.vcf	CD39+ secreting CD4 regulatory T cell %CD4 regulatory T cell	7	0.00276223	0.00717617	0.700299	-0.0113031	0.0168275	1.00277	0.988761	1.01697
ebi-a-GCST90001497	ieu-b-85.vcf	CD39+ secreting CD4 regulatory T cell %CD4 regulatory T cell	7	0.00933549	0.0121653	0.477504	-0.0145084	0.0331794	1.00938	0.985596	1.03374
ebi-a-GCST90001497	ieu-b-85.vcf	CD39+ secreting CD4 regulatory T cell %CD4 regulatory T cell	7	0.00451223	0.00743807	0.54409	-0.0100664	0.0190908	1.00452	0.989984	1.01927
ebi-a-GCST90001497	ieu-b-85.vcf	CD39+ secreting CD4 regulatory T cell %CD4 regulatory T cell	7	0.00466933	0.00738096	0.550316	-0.00979735	0.019136	1.00468	0.99025	1.01932
ebi-a-GCST90001496	ieu-b-85.vcf	CD39+ secreting CD4 regulatory T cell %secreting CD4 regulatory T cell	7	0.00812334	0.00708116	0.251309	-0.00575574	0.0220024	1.00816	0.994261	1.02225
ebi-a-GCST90001496	ieu-b-85.vcf	CD39+ secreting CD4 regulatory T cell %secreting CD4 regulatory T cell	7	0.009819	0.0174196	0.597317	-0.0243234	0.0439614	1.00987	0.97597	1.04494
ebi-a-GCST90001496	ieu-b-85.vcf	CD39+ secreting CD4 regulatory T cell %secreting CD4 regulatory T cell	7	0.00814018	0.00736836	0.269269	-0.00630181	0.0225822	1.00817	0.993718	1.02284
ebi-a-GCST90001496	ieu-b-85.vcf	CD39+ secreting CD4 regulatory T cell %secreting CD4 regulatory T cell	7	0.00809931	0.00748431	0.320739	-0.00656993	0.0227685	1.00813	0.993452	1.02303
ebi-a-GCST90001495	ieu-b-85.vcf	CD39+ secreting CD4 regulatory T cell Absolute Count	5	0.00693383	0.00739138	0.348194	-0.00755327	0.0214209	1.00696	0.992475	1.02165
ebi-a-GCST90001495	ieu-b-85.vcf	CD39+ secreting CD4 regulatory T cell Absolute Count	5	0.0137326	0.0133098	0.378074	-0.0123546	0.0398197	1.01383	0.987721	1.04062
ebi-a-GCST90001495	ieu-b-85.vcf	CD39+ secreting CD4 regulatory T cell Absolute Count	5	0.00855721	0.00803953	0.287151	-0.00720027	0.0243147	1.00859	0.992826	1.02461
ebi-a-GCST90001495	ieu-b-85.vcf	CD39+ secreting CD4 regulatory T cell Absolute Count	5	0.00894285	0.00795004	0.323571	-0.00663922	0.0245249	1.00898	0.993383	1.02483
ebi-a-GCST90001494	ieu-b-85.vcf	Secreting CD4 regulatory T cell %CD4+ T cell	7	0.00118324	0.0118673	0.920578	-0.0220766	0.0244431	1.00118	0.978165	1.02474
ebi-a-GCST90001494	ieu-b-85.vcf	Secreting CD4 regulatory T cell %CD4+ T cell	7	0.00739266	0.0158846	0.661213	-0.0237412	0.0385265	1.00742	0.976538	1.03928
ebi-a-GCST90001494	ieu-b-85.vcf	Secreting CD4 regulatory T cell %CD4+ T cell	7	0.0100054	0.00987595	0.31101	-0.00935149	0.0293622	1.01006	0.990692	1.0298
ebi-a-GCST90001494	ieu-b-85.vcf	Secreting CD4 regulatory T cell %CD4+ T cell	7	0.00753134	0.00999628	0.479711	-0.0120614	0.027124	1.00756	0.988011	1.0275
ebi-a-GCST90001493	ieu-b-85.vcf	Secreting CD4 regulatory T cell %CD4 regulatory T cell	5	0.00665389	0.00824505	0.419657	-0.0095064	0.0228142	1.00668	0.990539	1.02308
ebi-a-GCST90001493	ieu-b-85.vcf	Secreting CD4 regulatory T cell %CD4 regulatory T cell	5	0.00504005	0.0107872	0.672182	-0.0161029	0.0261831	1.00505	0.984026	1.02653
ebi-a-GCST90001493	ieu-b-85.vcf	Secreting CD4 regulatory T cell %CD4 regulatory T cell	5	0.00691995	0.0101397	0.494947	-0.0129538	0.0267937	1.00694	0.98713	1.02716
ebi-a-GCST90001493	ieu-b-85.vcf	Secreting CD4 regulatory T cell %CD4 regulatory T cell	5	0.0168248	0.0111435	0.205598	-0.00501644	0.0386661	1.01697	0.994996	1.03942
ebi-a-GCST90001492	ieu-b-85.vcf	Secreting CD4 regulatory T cell Absolute Count	4	-0.00416149	0.0148863	0.779821	-0.0333385	0.0250156	0.995847	0.967211	1.02533
ebi-a-GCST90001492	ieu-b-85.vcf	Secreting CD4 regulatory T cell Absolute Count	4	0.0204119	0.0226732	0.462992	-0.0240275	0.0648513	1.02062	0.976259	1.067
ebi-a-GCST90001492	ieu-b-85.vcf	Secreting CD4 regulatory T cell Absolute Count	4	-0.00125096	0.0137415	0.927464	-0.0281843	0.0256824	0.99875	0.972209	1.02602
ebi-a-GCST90001492	ieu-b-85.vcf	Secreting CD4 regulatory T cell Absolute Count	4	0.00522716	0.0150671	0.751557	-0.0243043	0.0347586	1.00524	0.975989	1.03537
ebi-a-GCST90001491	ieu-b-85.vcf	CD39+ activated CD4 regulatory T cell %CD4 regulatory T cell	6	0.00350808	0.00798972	0.660608	-0.0121518	0.0191679	1.00351	0.987922	1.01935
ebi-a-GCST90001491	ieu-b-85.vcf	CD39+ activated CD4 regulatory T cell %CD4 regulatory T cell	6	0.0103493	0.013779	0.494371	-0.0166576	0.0373561	1.0104	0.98348	1.03806
ebi-a-GCST90001491	ieu-b-85.vcf	CD39+ activated CD4 regulatory T cell %CD4 regulatory T cell	6	0.00490799	0.00867799	0.571688	-0.0121009	0.0219169	1.00492	0.987972	1.02216
ebi-a-GCST90001491	ieu-b-85.vcf	CD39+ activated CD4 regulatory T cell %CD4 regulatory T cell	6	0.00491396	0.00860307	0.592588	-0.0119481	0.021776	1.00493	0.988123	1.02201
ebi-a-GCST90001489	ieu-b-85.vcf	CD39+ activated CD4 regulatory T cell Absolute Count	4	-0.00210239	0.0178258	0.906114	-0.0370409	0.0328361	0.9979	0.963637	1.03338
ebi-a-GCST90001489	ieu-b-85.vcf	CD39+ activated CD4 regulatory T cell Absolute Count	4	0.00797458	0.0679999	0.917359	-0.125305	0.141254	1.00801	0.882228	1.15172
ebi-a-GCST90001489	ieu-b-85.vcf	CD39+ activated CD4 regulatory T cell Absolute Count	4	0.00454608	0.0202854	0.822675	-0.0352134	0.0443056	1.00456	0.965399	1.0453
ebi-a-GCST90001489	ieu-b-85.vcf	CD39+ activated CD4 regulatory T cell Absolute Count	4	0.0051987	0.0228765	0.834835	-0.0396392	0.0500366	1.00521	0.961136	1.05131
ebi-a-GCST90001487	ieu-b-85.vcf	Activated CD4 regulatory T cell %CD4 regulatory T cell	4	-0.00732327	0.0142672	0.607744	-0.0352869	0.0206403	0.992703	0.965328	1.02085
ebi-a-GCST90001487	ieu-b-85.vcf	Activated CD4 regulatory T cell %CD4 regulatory T cell	4	-0.00591351	0.0367215	0.886861	-0.0778876	0.0660606	0.994104	0.925068	1.06829
ebi-a-GCST90001487	ieu-b-85.vcf	Activated CD4 regulatory T cell %CD4 regulatory T cell	4	0.00362925	0.0167704	0.82867	-0.0292408	0.0364993	1.00364	0.971183	1.03717
ebi-a-GCST90001487	ieu-b-85.vcf	Activated CD4 regulatory T cell %CD4 regulatory T cell	4	0.00728626	0.0185761	0.721087	-0.0291229	0.0436954	1.00731	0.971297	1.04466
ebi-a-GCST90001486	ieu-b-85.vcf	Activated CD4 regulatory T cell Absolute Count	2	0.00113219	0.0348639	0.974094	-0.067201	0.0694654	1.00113	0.935007	1.07193
ebi-a-GCST90001485	ieu-b-85.vcf	CD39+ resting CD4 regulatory T cell %CD4 regulatory T cell	12	-0.000430564	0.00617389	0.944401	-0.0125314	0.0116703	0.99957	0.987547	1.01174
ebi-a-GCST90001485	ieu-b-85.vcf	CD39+ resting CD4 regulatory T cell %CD4 regulatory T cell	12	0.00640727	0.0090288	0.494137	-0.0112892	0.0241037	1.00643	0.988774	1.0244
ebi-a-GCST90001485	ieu-b-85.vcf	CD39+ resting CD4 regulatory T cell %CD4 regulatory T cell	12	0.00708992	0.00786815	0.36754	-0.00833166	0.0225115	1.00712	0.991703	1.02277
ebi-a-GCST90001485	ieu-b-85.vcf	CD39+ resting CD4 regulatory T cell %CD4 regulatory T cell	12	0.00526551	0.00739069	0.491021	-0.00922024	0.0197513	1.00528	0.990822	1.01995
ebi-a-GCST90001484	ieu-b-85.vcf	CD39+ resting CD4 regulatory T cell %resting CD4 regulatory T cell	7	-0.0108821	0.0133947	0.416552	-0.0371357	0.0153715	0.989177	0.963545	1.01549
ebi-a-GCST90001484	ieu-b-85.vcf	CD39+ resting CD4 regulatory T cell %resting CD4 regulatory T cell	7	0.00866176	0.0248229	0.741346	-0.0399911	0.0573146	1.0087	0.960798	1.05899
ebi-a-GCST90001484	ieu-b-85.vcf	CD39+ resting CD4 regulatory T cell %resting CD4 regulatory T cell	7	-0.00717051	0.0168426	0.670301	-0.0401821	0.0258411	0.992855	0.960615	1.02618
ebi-a-GCST90001484	ieu-b-85.vcf	CD39+ resting CD4 regulatory T cell %resting CD4 regulatory T cell	7	-0.00645362	0.0181824	0.734779	-0.0420911	0.0291839	0.993567	0.958782	1.02961
ebi-a-GCST90001483	ieu-b-85.vcf	CD39+ resting CD4 regulatory T cell Absolute Count	9	-0.00954587	0.0104275	0.359956	-0.0299838	0.0108921	0.9905	0.970461	1.01095
ebi-a-GCST90001483	ieu-b-85.vcf	CD39+ resting CD4 regulatory T cell Absolute Count	9	0.000259543	0.014324	0.986049	-0.0278155	0.0283346	1.00026	0.972568	1.02874
ebi-a-GCST90001483	ieu-b-85.vcf	CD39+ resting CD4 regulatory T cell Absolute Count	9	-0.00469743	0.0122171	0.70061	-0.0286428	0.019248	0.995314	0.971763	1.01943
ebi-a-GCST90001483	ieu-b-85.vcf	CD39+ resting CD4 regulatory T cell Absolute Count	9	-0.00451268	0.0120321	0.717369	-0.0280956	0.0190703	0.995497	0.972295	1.01925
ebi-a-GCST90001482	ieu-b-85.vcf	Resting CD4 regulatory T cell %CD4+ T cell	6	-0.00455665	0.00965946	0.63712	-0.0234892	0.0143759	0.995454	0.976785	1.01448
ebi-a-GCST90001482	ieu-b-85.vcf	Resting CD4 regulatory T cell %CD4+ T cell	6	0.000714512	0.0140926	0.961994	-0.0269069	0.028336	1.00071	0.973452	1.02874
ebi-a-GCST90001482	ieu-b-85.vcf	Resting CD4 regulatory T cell %CD4+ T cell	6	-0.00603729	0.0113939	0.596203	-0.0283694	0.0162948	0.993981	0.972029	1.01643
ebi-a-GCST90001482	ieu-b-85.vcf	Resting CD4 regulatory T cell %CD4+ T cell	6	-0.0059889	0.0122868	0.646574	-0.030071	0.0180932	0.994029	0.970377	1.01826
ebi-a-GCST90001481	ieu-b-85.vcf	Resting CD4 regulatory T cell %CD4 regulatory T cell	10	-0.0045911	0.00780626	0.556445	-0.0198914	0.0107092	0.995419	0.980305	1.01077
ebi-a-GCST90001481	ieu-b-85.vcf	Resting CD4 regulatory T cell %CD4 regulatory T cell	10	0.000151258	0.0105253	0.988886	-0.0204784	0.0207809	1.00015	0.97973	1.021
ebi-a-GCST90001481	ieu-b-85.vcf	Resting CD4 regulatory T cell %CD4 regulatory T cell	10	-0.00487107	0.00981516	0.619697	-0.0241088	0.0143666	0.995141	0.97618	1.01447
ebi-a-GCST90001481	ieu-b-85.vcf	Resting CD4 regulatory T cell %CD4 regulatory T cell	10	-0.0052707	0.0100569	0.612879	-0.0249823	0.0144409	0.994743	0.975327	1.01455
ebi-a-GCST90001480	ieu-b-85.vcf	Resting CD4 regulatory T cell Absolute Count	4	-0.00952916	0.0149891	0.524947	-0.0389078	0.0198495	0.990516	0.961839	1.02005
ebi-a-GCST90001480	ieu-b-85.vcf	Resting CD4 regulatory T cell Absolute Count	4	-0.00642146	0.020351	0.782237	-0.0463094	0.0334665	0.993599	0.954747	1.03403
ebi-a-GCST90001480	ieu-b-85.vcf	Resting CD4 regulatory T cell Absolute Count	4	-0.00982393	0.0162358	0.545127	-0.0416461	0.0219983	0.990224	0.959209	1.02224
ebi-a-GCST90001480	ieu-b-85.vcf	Resting CD4 regulatory T cell Absolute Count	4	-0.00829317	0.0173708	0.665689	-0.04234	0.0257537	0.991741	0.958544	1.02609
ebi-a-GCST90001478	ieu-b-85.vcf	CD4 regulatory T cell %CD4+ T cell	2	0.00345564	0.10247	0.973098	-0.197386	0.204297	1.00346	0.820874	1.22666
ebi-a-GCST90001475	ieu-b-85.vcf	HLA DR++ monocyte %monocyte	3	0.0558229	0.0213959	0.00907954	0.0138869	0.0977588	1.05741	1.01398	1.1027
ebi-a-GCST90001475	ieu-b-85.vcf	HLA DR++ monocyte %monocyte	3	0.182705	0.104118	0.329748	-0.0213652	0.386776	1.20046	0.978861	1.47223
ebi-a-GCST90001475	ieu-b-85.vcf	HLA DR++ monocyte %monocyte	3	0.0529695	0.024202	0.0286226	0.00553369	0.100405	1.0544	1.00555	1.10562
ebi-a-GCST90001475	ieu-b-85.vcf	HLA DR++ monocyte %monocyte	3	0.0761206	0.0275859	0.110069	0.0220523	0.130189	1.07909	1.0223	1.13904
ebi-a-GCST90001474	ieu-b-85.vcf	Plasmacytoid Dendritic Cell %Dendritic Cell	2	0.0195035	0.0287627	0.497718	-0.0368713	0.0758783	1.01969	0.9638	1.07883
ebi-a-GCST90001473	ieu-b-85.vcf	CD62L- CD86+ myeloid Dendritic Cell %Dendritic Cell	6	-0.0147076	0.0124843	0.238762	-0.039177	0.00976167	0.9854	0.961581	1.00981
ebi-a-GCST90001473	ieu-b-85.vcf	CD62L- CD86+ myeloid Dendritic Cell %Dendritic Cell	6	-0.0164493	0.0232146	0.517698	-0.0619499	0.0290513	0.983685	0.93993	1.02948
ebi-a-GCST90001473	ieu-b-85.vcf	CD62L- CD86+ myeloid Dendritic Cell %Dendritic Cell	6	-0.0203584	0.0142165	0.152135	-0.0482228	0.00750585	0.979847	0.952921	1.00753
ebi-a-GCST90001473	ieu-b-85.vcf	CD62L- CD86+ myeloid Dendritic Cell %Dendritic Cell	6	-0.0208934	0.0137619	0.189421	-0.0478667	0.00607995	0.979323	0.953261	1.0061
ebi-a-GCST90001472	ieu-b-85.vcf	CD62L- CD86+ myeloid Dendritic Cell Absolute Count	6	-0.0148807	0.0124865	0.233362	-0.0393543	0.00959286	0.985229	0.96141	1.00964
ebi-a-GCST90001472	ieu-b-85.vcf	CD62L- CD86+ myeloid Dendritic Cell Absolute Count	6	-0.0156453	0.0229834	0.533411	-0.0606928	0.0294021	0.984476	0.941112	1.02984
ebi-a-GCST90001472	ieu-b-85.vcf	CD62L- CD86+ myeloid Dendritic Cell Absolute Count	6	-0.0206093	0.014066	0.14287	-0.0481785	0.00696002	0.979602	0.952964	1.00698
ebi-a-GCST90001472	ieu-b-85.vcf	CD62L- CD86+ myeloid Dendritic Cell Absolute Count	6	-0.0209442	0.0150164	0.221884	-0.0503763	0.00848789	0.979274	0.950872	1.00852
ebi-a-GCST90001471	ieu-b-85.vcf	CD62L- plasmacytoid Dendritic Cell %Dendritic Cell	2	0.0351093	0.0241327	0.145712	-0.0121908	0.0824095	1.03573	0.987883	1.0859
ebi-a-GCST90001469	ieu-b-85.vcf	CD62L- myeloid Dendritic Cell %Dendritic Cell	7	-0.0163689	0.0136817	0.231538	-0.043185	0.0104473	0.983764	0.957734	1.0105
ebi-a-GCST90001469	ieu-b-85.vcf	CD62L- myeloid Dendritic Cell %Dendritic Cell	7	-0.0141836	0.0249154	0.593792	-0.0630178	0.0346506	0.985916	0.938927	1.03526
ebi-a-GCST90001469	ieu-b-85.vcf	CD62L- myeloid Dendritic Cell %Dendritic Cell	7	-0.0231	0.0157246	0.141824	-0.0539203	0.00772027	0.977165	0.947508	1.00775
ebi-a-GCST90001469	ieu-b-85.vcf	CD62L- myeloid Dendritic Cell %Dendritic Cell	7	-0.0233037	0.0161131	0.198247	-0.0548854	0.00827808	0.976966	0.946594	1.00831
ebi-a-GCST90001468	ieu-b-85.vcf	CD62L- myeloid Dendritic Cell Absolute Count	6	-0.0150547	0.0140056	0.282417	-0.0425057	0.0123963	0.985058	0.958385	1.01247
ebi-a-GCST90001468	ieu-b-85.vcf	CD62L- myeloid Dendritic Cell Absolute Count	6	-0.0161327	0.0365933	0.68209	-0.0878555	0.0555901	0.983997	0.915893	1.05716
ebi-a-GCST90001468	ieu-b-85.vcf	CD62L- myeloid Dendritic Cell Absolute Count	6	-0.0229104	0.0163658	0.161544	-0.0549874	0.00916652	0.97735	0.946497	1.00921
ebi-a-GCST90001468	ieu-b-85.vcf	CD62L- myeloid Dendritic Cell Absolute Count	6	-0.0237843	0.0173553	0.228876	-0.0578007	0.0102321	0.976496	0.943838	1.01028
ebi-a-GCST90001465	ieu-b-85.vcf	CD86+ myeloid Dendritic Cell %Dendritic Cell	4	-0.0224265	0.0152763	0.142089	-0.0523681	0.00751507	0.977823	0.948979	1.00754
ebi-a-GCST90001465	ieu-b-85.vcf	CD86+ myeloid Dendritic Cell %Dendritic Cell	4	-0.0316892	0.0356657	0.468012	-0.101594	0.0382156	0.968808	0.903396	1.03896
ebi-a-GCST90001465	ieu-b-85.vcf	CD86+ myeloid Dendritic Cell %Dendritic Cell	4	-0.0237882	0.0159674	0.136277	-0.0550843	0.00750788	0.976493	0.946405	1.00754
ebi-a-GCST90001465	ieu-b-85.vcf	CD86+ myeloid Dendritic Cell %Dendritic Cell	4	-0.0237727	0.0172652	0.262297	-0.0576125	0.0100671	0.976508	0.944016	1.01012
ebi-a-GCST90001464	ieu-b-85.vcf	CD86+ myeloid Dendritic Cell Absolute Count	5	-0.015701	0.0144287	0.276516	-0.0439811	0.0125792	0.984422	0.956972	1.01266
ebi-a-GCST90001464	ieu-b-85.vcf	CD86+ myeloid Dendritic Cell Absolute Count	5	-0.0222652	0.0361506	0.581535	-0.0931204	0.0485899	0.977981	0.911084	1.04979
ebi-a-GCST90001464	ieu-b-85.vcf	CD86+ myeloid Dendritic Cell Absolute Count	5	-0.022429	0.0154698	0.147097	-0.0527497	0.00789171	0.977821	0.948617	1.00792
ebi-a-GCST90001464	ieu-b-85.vcf	CD86+ myeloid Dendritic Cell Absolute Count	5	-0.0242566	0.0169329	0.225273	-0.057445	0.00893193	0.976035	0.944174	1.00897
ebi-a-GCST90001463	ieu-b-85.vcf	CD62L- Dendritic Cell %Dendritic Cell	3	-0.0193634	0.0179721	0.281295	-0.0545887	0.0158619	0.980823	0.946875	1.01599
ebi-a-GCST90001463	ieu-b-85.vcf	CD62L- Dendritic Cell %Dendritic Cell	3	-0.0617193	0.0352009	0.329976	-0.130713	0.00727452	0.940147	0.87747	1.0073
ebi-a-GCST90001463	ieu-b-85.vcf	CD62L- Dendritic Cell %Dendritic Cell	3	-0.0255608	0.0174603	0.14321	-0.0597829	0.0086613	0.974763	0.941969	1.0087
ebi-a-GCST90001463	ieu-b-85.vcf	CD62L- Dendritic Cell %Dendritic Cell	3	-0.0257246	0.0172382	0.274158	-0.0595115	0.00806229	0.974603	0.942225	1.00809
ebi-a-GCST90001462	ieu-b-85.vcf	CD62L- Dendritic Cell Absolute Count	5	-0.0160848	0.0151539	0.288495	-0.0457864	0.0136168	0.984044	0.955246	1.01371
ebi-a-GCST90001462	ieu-b-85.vcf	CD62L- Dendritic Cell Absolute Count	5	-0.0228727	0.0407674	0.613939	-0.102777	0.0570314	0.977387	0.902328	1.05869
ebi-a-GCST90001462	ieu-b-85.vcf	CD62L- Dendritic Cell Absolute Count	5	-0.0243752	0.0172225	0.156977	-0.0581312	0.00938088	0.97592	0.943526	1.00943
ebi-a-GCST90001462	ieu-b-85.vcf	CD62L- Dendritic Cell Absolute Count	5	-0.0255455	0.0183826	0.23698	-0.0615755	0.0104844	0.974778	0.940282	1.01054
ebi-a-GCST90001461	ieu-b-85.vcf	Dendritic Cell Absolute Count	3	-0.0310349	0.0207704	0.135127	-0.0717448	0.00967513	0.969442	0.930768	1.00972
ebi-a-GCST90001461	ieu-b-85.vcf	Dendritic Cell Absolute Count	3	-0.0589756	0.0539743	0.471829	-0.164765	0.0468139	0.94273	0.848093	1.04793
ebi-a-GCST90001461	ieu-b-85.vcf	Dendritic Cell Absolute Count	3	-0.0339735	0.0221238	0.124635	-0.0773361	0.00938923	0.966597	0.925579	1.00943
ebi-a-GCST90001461	ieu-b-85.vcf	Dendritic Cell Absolute Count	3	-0.034155	0.0231652	0.278314	-0.0795587	0.0112488	0.966422	0.923524	1.01131
ebi-a-GCST90001460	ieu-b-85.vcf	Plasmacytoid Dendritic Cell Absolute Count	2	-0.00293702	0.0343416	0.931845	-0.0702465	0.0643724	0.997067	0.932164	1.06649
ebi-a-GCST90001459	ieu-b-85.vcf	Myeloid Dendritic Cell %Dendritic Cell	2	-0.0269173	0.0208954	0.197678	-0.0678723	0.0140376	0.973442	0.93438	1.01414
ebi-a-GCST90001458	ieu-b-85.vcf	Myeloid Dendritic Cell Absolute Count	3	-0.0259009	0.0187522	0.167213	-0.0626552	0.0108535	0.974432	0.939267	1.01091
ebi-a-GCST90001458	ieu-b-85.vcf	Myeloid Dendritic Cell Absolute Count	3	-0.0505878	0.0498413	0.495268	-0.148277	0.0471011	0.95067	0.862192	1.04823
ebi-a-GCST90001458	ieu-b-85.vcf	Myeloid Dendritic Cell Absolute Count	3	-0.0287503	0.0193176	0.136673	-0.0666127	0.00911216	0.971659	0.935557	1.00915
ebi-a-GCST90001458	ieu-b-85.vcf	Myeloid Dendritic Cell Absolute Count	3	-0.028774	0.019643	0.280568	-0.0672743	0.00972619	0.971636	0.934939	1.00977
ebi-a-GCST90001451	ieu-b-85.vcf	CD62L- monocyte %monocyte	4	0.00767129	0.019731	0.697429	-0.0310015	0.046344	1.0077	0.969474	1.04743
ebi-a-GCST90001451	ieu-b-85.vcf	CD62L- monocyte %monocyte	4	0.0127763	0.0842835	0.893422	-0.152419	0.177972	1.01286	0.858628	1.19479
ebi-a-GCST90001451	ieu-b-85.vcf	CD62L- monocyte %monocyte	4	0.0135994	0.0221209	0.538705	-0.0297577	0.0569564	1.01369	0.970681	1.05861
ebi-a-GCST90001451	ieu-b-85.vcf	CD62L- monocyte %monocyte	4	0.0166305	0.0249244	0.552356	-0.0322214	0.0654825	1.01677	0.968292	1.06767
ebi-a-GCST90001450	ieu-b-85.vcf	CD62L- monocyte Absolute Count	2	0.0319648	0.0306923	0.297661	-0.028192	0.0921216	1.03248	0.972202	1.0965
ebi-a-GCST90001442	ieu-b-85.vcf	CD24+ CD27+ B cell %lymphocyte	3	-0.053035	0.0452409	0.241085	-0.141707	0.0356372	0.948347	0.867875	1.03628
ebi-a-GCST90001442	ieu-b-85.vcf	CD24+ CD27+ B cell %lymphocyte	3	-0.0276781	0.128152	0.864584	-0.278856	0.2235	0.972701	0.756649	1.25045
ebi-a-GCST90001442	ieu-b-85.vcf	CD24+ CD27+ B cell %lymphocyte	3	-0.0538596	0.0501008	0.282364	-0.152057	0.0443381	0.947565	0.858939	1.04534
ebi-a-GCST90001442	ieu-b-85.vcf	CD24+ CD27+ B cell %lymphocyte	3	-0.0535952	0.0535323	0.422197	-0.158518	0.051328	0.947816	0.853407	1.05267
ebi-a-GCST90001439	ieu-b-85.vcf	IgD+ CD24+ B cell %lymphocyte	2	-0.060846	0.0475448	0.200629	-0.154034	0.0323418	0.940968	0.857243	1.03287
ebi-a-GCST90001436	ieu-b-85.vcf	Memory B cell %lymphocyte	2	-0.0254939	0.0507639	0.615523	-0.124991	0.0740033	0.974828	0.882505	1.07681
ebi-a-GCST90001434	ieu-b-85.vcf	Switched memory B cell %lymphocyte	3	-0.0149727	0.0376403	0.69079	-0.0887477	0.0588023	0.985139	0.915076	1.06057
ebi-a-GCST90001434	ieu-b-85.vcf	Switched memory B cell %lymphocyte	3	-1.52532	1.02718	0.377301	-3.53858	0.487954	0.217553	0.0290544	1.62898
ebi-a-GCST90001434	ieu-b-85.vcf	Switched memory B cell %lymphocyte	3	0.00758583	0.0437	0.862189	-0.0780662	0.0932379	1.00761	0.924903	1.09772
ebi-a-GCST90001434	ieu-b-85.vcf	Switched memory B cell %lymphocyte	3	0.0174163	0.0519328	0.769262	-0.084372	0.119205	1.01757	0.919089	1.1266
ebi-a-GCST90001433	ieu-b-85.vcf	IgD- CD27- B cell %lymphocyte	2	-0.0143833	0.0336205	0.668787	-0.0802796	0.0515129	0.98572	0.922858	1.05286
ebi-a-GCST90001432	ieu-b-85.vcf	Unswitched memory B cell %lymphocyte	4	-0.0537826	0.0466043	0.24849	-0.145127	0.0375619	0.947638	0.864912	1.03828
ebi-a-GCST90001432	ieu-b-85.vcf	Unswitched memory B cell %lymphocyte	4	-0.135037	0.139906	0.43628	-0.409252	0.139178	0.873684	0.664147	1.14933
ebi-a-GCST90001432	ieu-b-85.vcf	Unswitched memory B cell %lymphocyte	4	-0.00789338	0.0533841	0.882453	-0.112526	0.0967395	0.992138	0.893574	1.10157
ebi-a-GCST90001432	ieu-b-85.vcf	Unswitched memory B cell %lymphocyte	4	-0.00681952	0.0566579	0.911804	-0.117869	0.10423	0.993204	0.888812	1.10986
ebi-a-GCST90001431	ieu-b-85.vcf	IgD+ CD38- B cell %lymphocyte	2	-0.161418	0.072415	0.0258089	-0.303352	-0.0194851	0.850936	0.738339	0.980704
ebi-a-GCST90001426	ieu-b-85.vcf	IgD- CD38dim B cell %lymphocyte	2	0.0747233	0.042196	0.0765836	-0.00798085	0.157427	1.07759	0.992051	1.1705
ebi-a-GCST90001424	ieu-b-85.vcf	IgD+ B cell %Lymphocyte	2	-0.053836	0.0507615	0.288887	-0.153329	0.0456566	0.947588	0.857848	1.04671
ebi-a-GCST90001417	ieu-b-85.vcf	CD24+ CD27+ B cell %B cell	3	0.0297749	0.0451697	0.509781	-0.0587576	0.118307	1.03022	0.942935	1.12559
ebi-a-GCST90001417	ieu-b-85.vcf	CD24+ CD27+ B cell %B cell	3	0.0606197	0.354093	0.892059	-0.633402	0.754641	1.06249	0.530783	2.12685
ebi-a-GCST90001417	ieu-b-85.vcf	CD24+ CD27+ B cell %B cell	3	0.0302252	0.0509514	0.553037	-0.0696395	0.13009	1.03069	0.93273	1.13893
ebi-a-GCST90001417	ieu-b-85.vcf	CD24+ CD27+ B cell %B cell	3	0.0303626	0.0569832	0.647424	-0.0813245	0.14205	1.03083	0.921895	1.15263
ebi-a-GCST90001406	ieu-b-85.vcf	Memory B cell %B cell	2	0.00447261	0.0680039	0.947561	-0.128815	0.13776	1.00448	0.879137	1.1477
ebi-a-GCST90001401	ieu-b-85.vcf	IgD- CD27- B cell Absolute Count	2	0.000419491	0.0284561	0.988238	-0.0553545	0.0561935	1.00042	0.94615	1.0578
ebi-a-GCST90001399	ieu-b-85.vcf	IgD- CD27- B cell %B cell	3	-0.0156264	0.0212588	0.462306	-0.0572936	0.0260408	0.984495	0.944317	1.02638
ebi-a-GCST90001399	ieu-b-85.vcf	IgD- CD27- B cell %B cell	3	0.0122946	0.0615657	0.874518	-0.108374	0.132963	1.01237	0.897292	1.14221
ebi-a-GCST90001399	ieu-b-85.vcf	IgD- CD27- B cell %B cell	3	-0.0118953	0.0219338	0.587592	-0.0548857	0.031095	0.988175	0.946593	1.03158
ebi-a-GCST90001399	ieu-b-85.vcf	IgD- CD27- B cell %B cell	3	-0.00742138	0.0232663	0.779978	-0.0530234	0.0381806	0.992606	0.948358	1.03892
ebi-a-GCST90001398	ieu-b-85.vcf	Unswitched memory B cell Absolute Count	2	-0.0567397	0.0801437	0.478961	-0.213821	0.100342	0.94484	0.807493	1.10555
ebi-a-GCST90001395	ieu-b-85.vcf	IgD+ CD38- B cell %B cell	2	-0.136074	0.0566159	0.0162408	-0.247041	-0.0251068	0.872778	0.781109	0.975206
ebi-a-GCST90001392	ieu-b-85.vcf	IgD+ CD38+ B cell Absolute Count	2	0.0569773	0.0545231	0.296017	-0.049888	0.163842	1.05863	0.951336	1.17803
