# Supplementary material for: Causal role of immune cells in prostate cancer: a bidirectional Mendelian-randomization analyses
Source: Aging (Albany NY). 2024 Jun 17;16(12):10477–88. doi: 10.18632/aging.205942 (PMC11236311; doi:10.18632/aging.205942)
Supplement: Supplementary Table 4 [file aging-16-205942-s005.xlsx]

## Sheet: Sheet1
Supplementary Table 4. The results of Cochrane’s Q test for immune cells on PCa.
id.exposure	id.outcome	exposure	Q	Q_df	Q_pval
ebi-a-GCST90001392	ieu-b-85.vcf	IgD+ CD38+ B cell Absolute Count	0.685866	1	0.407574
ebi-a-GCST90001534	ieu-b-85.vcf	CD45RA- CD4+ T cell Absolute Count	6.34452	1	0.0117745
ebi-a-GCST90001553	ieu-b-85.vcf	Naive CD8+ T cell %T cell	0.0677735	1	0.794607
ebi-a-GCST90001553	ieu-b-85.vcf	Naive CD8+ T cell %T cell	0.209563	2	0.900521
ebi-a-GCST90001573	ieu-b-85.vcf	Terminally Differentiated CD4-CD8- T cell %CD4-CD8- T cell	1.6217	1	0.202855
ebi-a-GCST90001618	ieu-b-85.vcf	HLA DR+ T cell Absolute Count	0.0297982	2	0.985211
ebi-a-GCST90001618	ieu-b-85.vcf	HLA DR+ T cell Absolute Count	0.53954	3	0.910123
ebi-a-GCST90001663	ieu-b-85.vcf	CD28- CD8dim T cell Absolute Count	0.000136767	1	0.990669
ebi-a-GCST90001669	ieu-b-85.vcf	CD28+ CD45RA- CD8dim T cell Absolute Count	1.25054	1	0.263449
ebi-a-GCST90001669	ieu-b-85.vcf	CD28+ CD45RA- CD8dim T cell Absolute Count	3.49888	2	0.173872
ebi-a-GCST90001693	ieu-b-85.vcf	CD28+ CD45RA- CD8+ T cell Absolute Count	1.56609	1	0.210776
ebi-a-GCST90001728	ieu-b-85.vcf	CD19 on IgD+ CD38- unswitched memory B cell	0.000842419	1	0.976845
ebi-a-GCST90001728	ieu-b-85.vcf	CD19 on IgD+ CD38- unswitched memory B cell	0.913339	2	0.63339
ebi-a-GCST90001729	ieu-b-85.vcf	CD19 on IgD+ CD38+ B cell	0.810196	2	0.666911
ebi-a-GCST90001729	ieu-b-85.vcf	CD19 on IgD+ CD38+ B cell	3.59509	3	0.308637
ebi-a-GCST90001778	ieu-b-85.vcf	CD25 on IgD+ CD24+ B cell	2.62347	1	0.105294
ebi-a-GCST90001778	ieu-b-85.vcf	CD25 on IgD+ CD24+ B cell	4.74888	2	0.0930668
ebi-a-GCST90001847	ieu-b-85.vcf	CD3 on HLA DR+ T cell	0.913329	1	0.339233
ebi-a-GCST90001851	ieu-b-85.vcf	CD3 on T cell	1.82986	1	0.176144
ebi-a-GCST90001851	ieu-b-85.vcf	CD3 on T cell	4.07813	2	0.130151
ebi-a-GCST90001857	ieu-b-85.vcf	CD3 on activated & secreting CD4 regulatory T cell	1.519	2	0.4679
ebi-a-GCST90001857	ieu-b-85.vcf	CD3 on activated & secreting CD4 regulatory T cell	3.72917	3	0.292232
ebi-a-GCST90001868	ieu-b-85.vcf	CD3 on CD4 regulatory T cell	3.29657	1	0.0694246
ebi-a-GCST90001868	ieu-b-85.vcf	CD3 on CD4 regulatory T cell	3.59712	2	0.165537
ebi-a-GCST90001888	ieu-b-85.vcf	CD28 on CD39+ secreting CD4 regulatory T cell	8.48668	1	0.00357757
ebi-a-GCST90001897	ieu-b-85.vcf	CD28 on CD39+ CD8+ T cell	0.0179873	1	0.89331
ebi-a-GCST90001908	ieu-b-85.vcf	CCR7 on naive CD8+ T cell	3.91496	1	0.0478583
ebi-a-GCST90001946	ieu-b-85.vcf	CD33 on CD14+ monocyte	5.8158	4	0.213333
ebi-a-GCST90001946	ieu-b-85.vcf	CD33 on CD14+ monocyte	8.46586	5	0.132362
ebi-a-GCST90001952	ieu-b-85.vcf	CD33 on Monocytic Myeloid-Derived Suppressor Cells	1.77882	2	0.410898
ebi-a-GCST90001952	ieu-b-85.vcf	CD33 on Monocytic Myeloid-Derived Suppressor Cells	1.93312	3	0.586403
ebi-a-GCST90001957	ieu-b-85.vcf	CD33 on CD33+ HLA DR+ CD14-	1.93131	2	0.380734
ebi-a-GCST90001957	ieu-b-85.vcf	CD33 on CD33+ HLA DR+ CD14-	2.04774	3	0.562557
ebi-a-GCST90001969	ieu-b-85.vcf	FSC-A on Natural Killer	0.31979	1	0.571734
ebi-a-GCST90001969	ieu-b-85.vcf	FSC-A on Natural Killer	0.322267	2	0.851178
ebi-a-GCST90002002	ieu-b-85.vcf	PDL-1 on monocyte	4.46968	1	0.0345014
ebi-a-GCST90002006	ieu-b-85.vcf	CD64 on monocyte	2.8286	5	0.72639
ebi-a-GCST90002006	ieu-b-85.vcf	CD64 on monocyte	18.7258	6	0.00465259
ebi-a-GCST90002010	ieu-b-85.vcf	HLA DR on monocyte	0.641641	2	0.725554
ebi-a-GCST90002010	ieu-b-85.vcf	HLA DR on monocyte	1.5953	3	0.660455
ebi-a-GCST90002060	ieu-b-85.vcf	CD8 on HLA DR+ CD8+ T cell	3.76684	1	0.0522783
ebi-a-GCST90002069	ieu-b-85.vcf	CD4 on CD39+ secreting CD4 regulatory T cell	13.8452	1	0.000198499
ebi-a-GCST90002069	ieu-b-85.vcf	CD4 on CD39+ secreting CD4 regulatory T cell	14.0102	2	0.000907263
ebi-a-GCST90002078	ieu-b-85.vcf	SSC-A on granulocyte	8.79281	1	0.0030242
ebi-a-GCST90002078	ieu-b-85.vcf	SSC-A on granulocyte	9.77858	2	0.00752678
ebi-a-GCST90001424	ieu-b-85.vcf	IgD+ B cell %Lymphocyte	0.263349	1	0.607829
ebi-a-GCST90001461	ieu-b-85.vcf	Dendritic Cell Absolute Count	0.0585977	1	0.808726
ebi-a-GCST90001461	ieu-b-85.vcf	Dendritic Cell Absolute Count	0.373161	2	0.829792
ebi-a-GCST90001464	ieu-b-85.vcf	CD86+ myeloid Dendritic Cell Absolute Count	2.53152	3	0.469622
ebi-a-GCST90001464	ieu-b-85.vcf	CD86+ myeloid Dendritic Cell Absolute Count	2.57074	4	0.632016
ebi-a-GCST90001474	ieu-b-85.vcf	Plasmacytoid Dendritic Cell %Dendritic Cell	1.87221	1	0.171222
ebi-a-GCST90001487	ieu-b-85.vcf	Activated CD4 regulatory T cell %CD4 regulatory T cell	2.19767	2	0.333259
ebi-a-GCST90001487	ieu-b-85.vcf	Activated CD4 regulatory T cell %CD4 regulatory T cell	2.19961	3	0.532025
ebi-a-GCST90001507	ieu-b-85.vcf	CD25++ CD45RA+ CD4 not regulatory T cell Absolute Count	1.8056	1	0.179037
ebi-a-GCST90001507	ieu-b-85.vcf	CD25++ CD45RA+ CD4 not regulatory T cell Absolute Count	2.01551	2	0.365037
ebi-a-GCST90001528	ieu-b-85.vcf	CD33dim HLA DR+ CD11b- %CD33dim HLA DR+	0.349234	1	0.554547
ebi-a-GCST90001528	ieu-b-85.vcf	CD33dim HLA DR+ CD11b- %CD33dim HLA DR+	1.35654	2	0.507494
ebi-a-GCST90001533	ieu-b-85.vcf	Basophil %CD33dim HLA DR- CD66b-	0.246974	1	0.619214
ebi-a-GCST90001533	ieu-b-85.vcf	Basophil %CD33dim HLA DR- CD66b-	0.257837	2	0.879046
ebi-a-GCST90001561	ieu-b-85.vcf	CD45RA+ CD8+ T cell %CD8+ T cell	2.95128	3	0.399198
ebi-a-GCST90001561	ieu-b-85.vcf	CD45RA+ CD8+ T cell %CD8+ T cell	7.67049	4	0.104422
ebi-a-GCST90001569	ieu-b-85.vcf	Effector Memory CD4-CD8- T cell Absolute Count	0.923081	1	0.336667
ebi-a-GCST90001569	ieu-b-85.vcf	Effector Memory CD4-CD8- T cell Absolute Count	3.44969	2	0.178201
ebi-a-GCST90001585	ieu-b-85.vcf	CD14+ CD16+ monocyte %monocyte	0.383827	1	0.535562
ebi-a-GCST90001585	ieu-b-85.vcf	CD14+ CD16+ monocyte %monocyte	2.17839	2	0.336487
ebi-a-GCST90001587	ieu-b-85.vcf	CD16+ monocyte %monocyte	3.09985	1	0.0782995
ebi-a-GCST90001667	ieu-b-85.vcf	CD28+ CD45RA- CD8dim T cell %T cell	0.604057	1	0.437034
ebi-a-GCST90001667	ieu-b-85.vcf	CD28+ CD45RA- CD8dim T cell %T cell	3.99343	2	0.13578
ebi-a-GCST90001736	ieu-b-85.vcf	CD19 on memory B cell	0.172022	1	0.678321
ebi-a-GCST90001785	ieu-b-85.vcf	CD25 on IgD- CD24- B cell	1.19145	1	0.275037
ebi-a-GCST90001860	ieu-b-85.vcf	CD3 on CD39+ CD4+ T cell	1.11112	2	0.57375
ebi-a-GCST90001860	ieu-b-85.vcf	CD3 on CD39+ CD4+ T cell	2.81719	3	0.420678
ebi-a-GCST90001884	ieu-b-85.vcf	CD16-CD56 on Natural Killer	7.36661	5	0.194771
ebi-a-GCST90001884	ieu-b-85.vcf	CD16-CD56 on Natural Killer	7.36685	6	0.288249
ebi-a-GCST90001890	ieu-b-85.vcf	CD28 on CD45RA+ CD4+ T cell	0.169025	1	0.680979
ebi-a-GCST90001892	ieu-b-85.vcf	CD28 on CD39+ CD4+ T cell	10.5694	3	0.0142972
ebi-a-GCST90001892	ieu-b-85.vcf	CD28 on CD39+ CD4+ T cell	10.6456	4	0.0308491
ebi-a-GCST90001894	ieu-b-85.vcf	CD28 on CD28+ CD4+ T cell	0.00190177	1	0.965216
ebi-a-GCST90001932	ieu-b-85.vcf	CD127 on CD45RA+ CD4+ T cell	7.84134	1	0.00510646
ebi-a-GCST90001955	ieu-b-85.vcf	CD33 on Immature Myeloid-Derived Suppressor Cells	3.98199	4	0.408448
ebi-a-GCST90001955	ieu-b-85.vcf	CD33 on Immature Myeloid-Derived Suppressor Cells	3.98211	5	0.551995
ebi-a-GCST90002036	ieu-b-85.vcf	CD80 on CD62L+ myeloid Dendritic Cell	0.11428	1	0.735323
ebi-a-GCST90002062	ieu-b-85.vcf	CD4 on CD28+ CD4+ T cell	2.81642	1	0.0933046
ebi-a-GCST90002087	ieu-b-85.vcf	CD11c on myeloid Dendritic Cell	1.88209	3	0.597237
ebi-a-GCST90002087	ieu-b-85.vcf	CD11c on myeloid Dendritic Cell	1.9002	4	0.754107
ebi-a-GCST90002088	ieu-b-85.vcf	CD11c on CD62L+ myeloid Dendritic Cell	0.000919661	1	0.975807
ebi-a-GCST90002089	ieu-b-85.vcf	CD11c on monocyte	1.18764	1	0.275806
ebi-a-GCST90002104	ieu-b-85.vcf	HLA DR on myeloid Dendritic Cell	0.167086	4	0.996699
ebi-a-GCST90002104	ieu-b-85.vcf	HLA DR on myeloid Dendritic Cell	0.903019	5	0.970003
ebi-a-GCST90001480	ieu-b-85.vcf	Resting CD4 regulatory T cell Absolute Count	0.27557	2	0.871286
ebi-a-GCST90001480	ieu-b-85.vcf	Resting CD4 regulatory T cell Absolute Count	0.326538	3	0.954963
ebi-a-GCST90001483	ieu-b-85.vcf	CD39+ resting CD4 regulatory T cell Absolute Count	5.42528	7	0.608211
ebi-a-GCST90001483	ieu-b-85.vcf	CD39+ resting CD4 regulatory T cell Absolute Count	6.42219	8	0.600051
ebi-a-GCST90001495	ieu-b-85.vcf	CD39+ secreting CD4 regulatory T cell Absolute Count	0.639683	3	0.887291
ebi-a-GCST90001495	ieu-b-85.vcf	CD39+ secreting CD4 regulatory T cell Absolute Count	1.01696	4	0.907214
ebi-a-GCST90001527	ieu-b-85.vcf	CD33dim HLA DR+ CD11b- Absolute Count	0.0375608	1	0.846328
ebi-a-GCST90001546	ieu-b-85.vcf	Terminally Differentiated CD4+ T cell %CD4+ T cell	8.61035	2	0.0134985
ebi-a-GCST90001546	ieu-b-85.vcf	Terminally Differentiated CD4+ T cell %CD4+ T cell	9.62442	3	0.0220439
ebi-a-GCST90001555	ieu-b-85.vcf	Effector Memory CD8+ T cell %CD8+ T cell	0.658029	2	0.719633
ebi-a-GCST90001555	ieu-b-85.vcf	Effector Memory CD8+ T cell %CD8+ T cell	2.25664	3	0.520879
ebi-a-GCST90001571	ieu-b-85.vcf	Effector Memory CD4-CD8- T cell %T cell	0.00128032	1	0.971457
ebi-a-GCST90001571	ieu-b-85.vcf	Effector Memory CD4-CD8- T cell %T cell	0.214674	2	0.898223
ebi-a-GCST90001581	ieu-b-85.vcf	CD14- CD16- Absolute Count	0.0380957	1	0.845251
ebi-a-GCST90001619	ieu-b-85.vcf	HLA DR+ T cell%T cell	3.06239	2	0.216277
ebi-a-GCST90001619	ieu-b-85.vcf	HLA DR+ T cell%T cell	4.54359	3	0.208435
ebi-a-GCST90001646	ieu-b-85.vcf	Natural Killer %CD3- lymphocyte	1.46109	3	0.691279
ebi-a-GCST90001646	ieu-b-85.vcf	Natural Killer %CD3- lymphocyte	1.59246	4	0.810148
ebi-a-GCST90001650	ieu-b-85.vcf	HLA DR+ Natural Killer %CD3- lymphocyte	0.408522	2	0.815249
ebi-a-GCST90001650	ieu-b-85.vcf	HLA DR+ Natural Killer %CD3- lymphocyte	0.694659	3	0.874459
ebi-a-GCST90001695	ieu-b-85.vcf	CD45RA- CD28- CD8+ T cell Absolute Count	148.12	143	0.367473
ebi-a-GCST90001695	ieu-b-85.vcf	CD45RA- CD28- CD8+ T cell Absolute Count	148.3	144	0.385865
ebi-a-GCST90001709	ieu-b-85.vcf	BAFF-R on IgD+ CD38dim B cell	13.9322	7	0.0524011
ebi-a-GCST90001709	ieu-b-85.vcf	BAFF-R on IgD+ CD38dim B cell	14.3094	8	0.0740498
ebi-a-GCST90001716	ieu-b-85.vcf	BAFF-R on naive-mature B cell	13.9267	7	0.0524998
ebi-a-GCST90001716	ieu-b-85.vcf	BAFF-R on naive-mature B cell	14.31	8	0.0740357
ebi-a-GCST90001717	ieu-b-85.vcf	BAFF-R on unswitched memory B cell	18.8339	7	0.00872397
ebi-a-GCST90001717	ieu-b-85.vcf	BAFF-R on unswitched memory B cell	20.8843	8	0.00746117
ebi-a-GCST90001730	ieu-b-85.vcf	CD19 on IgD+ CD38dim B cell	0.761176	2	0.683459
ebi-a-GCST90001730	ieu-b-85.vcf	CD19 on IgD+ CD38dim B cell	3.60417	3	0.307501
ebi-a-GCST90001746	ieu-b-85.vcf	CD20 on IgD+ CD24+ B cell	0.0181312	1	0.892887
ebi-a-GCST90001768	ieu-b-85.vcf	CD24 on IgD+ CD38+ B cell	1.17954	1	0.27745
ebi-a-GCST90001795	ieu-b-85.vcf	CD25 on transitional B cell	0.0125109	1	0.910941
ebi-a-GCST90001806	ieu-b-85.vcf	CD27 on unswitched memory B cell	3.68401	7	0.815368
ebi-a-GCST90001806	ieu-b-85.vcf	CD27 on unswitched memory B cell	3.90434	8	0.86565
ebi-a-GCST90001821	ieu-b-85.vcf	IgD on IgD+ CD24- B cell	4.46526	3	0.21541
ebi-a-GCST90001821	ieu-b-85.vcf	IgD on IgD+ CD24- B cell	4.55736	4	0.3358
ebi-a-GCST90001833	ieu-b-85.vcf	CD62L on CD62L+ Dendritic Cell	0.252505	1	0.615317
ebi-a-GCST90001858	ieu-b-85.vcf	CD3 on CD45RA+ CD4+ T cell	2.74088	3	0.433325
ebi-a-GCST90001858	ieu-b-85.vcf	CD3 on CD45RA+ CD4+ T cell	5.0037	4	0.286918
ebi-a-GCST90001950	ieu-b-85.vcf	CD33 on Granulocytic Myeloid-Derived Suppressor Cells	1.6896	1	0.193654
ebi-a-GCST90001950	ieu-b-85.vcf	CD33 on Granulocytic Myeloid-Derived Suppressor Cells	1.8794	2	0.390744
ebi-a-GCST90001953	ieu-b-85.vcf	CD33 on CD33dim HLA DR-	2.4046	4	0.661796
ebi-a-GCST90001953	ieu-b-85.vcf	CD33 on CD33dim HLA DR-	2.56051	5	0.767355
ebi-a-GCST90001989	ieu-b-85.vcf	CD40 on CD14- CD16+ monocyte	10.393	6	0.109049
ebi-a-GCST90001989	ieu-b-85.vcf	CD40 on CD14- CD16+ monocyte	12.8878	7	0.0748909
ebi-a-GCST90002017	ieu-b-85.vcf	CCR2 on monocyte	0.205055	1	0.650671
ebi-a-GCST90002024	ieu-b-85.vcf	CD4 on naive CD4+ T cell	6.9078	3	0.0748954
ebi-a-GCST90002024	ieu-b-85.vcf	CD4 on naive CD4+ T cell	6.9287	4	0.139704
ebi-a-GCST90002037	ieu-b-85.vcf	CD80 on plasmacytoid Dendritic Cell	1.43926	1	0.230259
ebi-a-GCST90002038	ieu-b-85.vcf	CD80 on CD62L+ plasmacytoid Dendritic Cell	1.44796	1	0.228856
ebi-a-GCST90002100	ieu-b-85.vcf	CD45RA on naive CD8+ T cell	2.35806	1	0.124637
ebi-a-GCST90001458	ieu-b-85.vcf	Myeloid Dendritic Cell Absolute Count	0.0790791	1	0.778549
ebi-a-GCST90001458	ieu-b-85.vcf	Myeloid Dendritic Cell Absolute Count	0.364867	2	0.83324
ebi-a-GCST90001491	ieu-b-85.vcf	CD39+ activated CD4 regulatory T cell %CD4 regulatory T cell	1.0669	4	0.899488
ebi-a-GCST90001491	ieu-b-85.vcf	CD39+ activated CD4 regulatory T cell %CD4 regulatory T cell	1.43826	5	0.920082
ebi-a-GCST90001535	ieu-b-85.vcf	CD45RA- CD4+ T cell %CD4+ T cell	3.09687	2	0.21258
ebi-a-GCST90001535	ieu-b-85.vcf	CD45RA- CD4+ T cell %CD4+ T cell	3.45273	3	0.326944
ebi-a-GCST90001596	ieu-b-85.vcf	CD8dim T cell Absolute Count	0.334196	1	0.563199
ebi-a-GCST90001599	ieu-b-85.vcf	CD4-CD8- T cell %T cell	0.725784	1	0.394253
ebi-a-GCST90001623	ieu-b-85.vcf	Natural Killer T %lymphocyte	4.64218	6	0.590454
ebi-a-GCST90001623	ieu-b-85.vcf	Natural Killer T %lymphocyte	4.78936	7	0.68565
ebi-a-GCST90001633	ieu-b-85.vcf	CD8dim Natural Killer T Absolute Count	3.79003	4	0.435167
ebi-a-GCST90001633	ieu-b-85.vcf	CD8dim Natural Killer T Absolute Count	4.4676	5	0.48423
ebi-a-GCST90001635	ieu-b-85.vcf	CD8dim Natural Killer T %lymphocyte	3.83624	4	0.428621
ebi-a-GCST90001635	ieu-b-85.vcf	CD8dim Natural Killer T %lymphocyte	4.45667	5	0.485702
ebi-a-GCST90001644	ieu-b-85.vcf	B cell %lymphocyte	0.145159	1	0.703205
ebi-a-GCST90001664	ieu-b-85.vcf	CD28+ CD45RA+ CD8dim T cell %T cell	5.14157	4	0.273078
ebi-a-GCST90001664	ieu-b-85.vcf	CD28+ CD45RA+ CD8dim T cell %T cell	5.37962	5	0.371327
ebi-a-GCST90001668	ieu-b-85.vcf	CD28+ CD45RA- CD8dim T cell %CD8dim T cell	1.04388	1	0.306921
ebi-a-GCST90001671	ieu-b-85.vcf	CD39+ CD8+ T cell %CD8+ T cell	12.9569	4	0.0114885
ebi-a-GCST90001671	ieu-b-85.vcf	CD39+ CD8+ T cell %CD8+ T cell	18.1935	5	0.00271344
ebi-a-GCST90001762	ieu-b-85.vcf	CD20 on IgD+ B cell	0.492057	1	0.483011
ebi-a-GCST90001763	ieu-b-85.vcf	CD20 on transitional B cell	0.0910687	1	0.762823
ebi-a-GCST90001784	ieu-b-85.vcf	CD25 on IgD+ CD38dim B cell	1.2862	1	0.256749
ebi-a-GCST90001784	ieu-b-85.vcf	CD25 on IgD+ CD38dim B cell	3.81025	2	0.148804
ebi-a-GCST90001826	ieu-b-85.vcf	IgD on unswitched memory B cell	5.81489	2	0.0546152
ebi-a-GCST90001826	ieu-b-85.vcf	IgD on unswitched memory B cell	8.69552	3	0.0336254
ebi-a-GCST90001861	ieu-b-85.vcf	CD3 on CD28+ CD4+ T cell	2.71683	1	0.0992951
ebi-a-GCST90001864	ieu-b-85.vcf	CD3 on CD28+ CD45RA+ CD8+ T cell	0.370333	1	0.542823
ebi-a-GCST90001864	ieu-b-85.vcf	CD3 on CD28+ CD45RA+ CD8+ T cell	1.92184	2	0.382541
ebi-a-GCST90001865	ieu-b-85.vcf	CD3 on CD28- CD8+ T cell	1.33893	1	0.247222
ebi-a-GCST90001867	ieu-b-85.vcf	CD3 on CD4+ T cell	0.224463	1	0.63566
ebi-a-GCST90001891	ieu-b-85.vcf	CD28 on CD45RA- CD4 not regulatory T cell	0.535116	1	0.464464
ebi-a-GCST90001891	ieu-b-85.vcf	CD28 on CD45RA- CD4 not regulatory T cell	3.2004	2	0.201856
ebi-a-GCST90001896	ieu-b-85.vcf	CD28 on CD28+ CD45RA+ CD8+ T cell	0.533337	1	0.465207
ebi-a-GCST90001896	ieu-b-85.vcf	CD28 on CD28+ CD45RA+ CD8+ T cell	1.11212	2	0.573464
ebi-a-GCST90001911	ieu-b-85.vcf	CD45 on Natural Killer	0.0213646	1	0.88379
ebi-a-GCST90001917	ieu-b-85.vcf	CD45 on CD8+ T cell	3.15349	1	0.0757649
ebi-a-GCST90001983	ieu-b-85.vcf	CD14 on CD14+ CD16+ monocyte	0.466479	1	0.494612
ebi-a-GCST90002015	ieu-b-85.vcf	CCR2 on plasmacytoid Dendritic Cell	2.29751	1	0.129582
ebi-a-GCST90002025	ieu-b-85.vcf	CD4 on Effector Memory CD4+ T cell	4.18842	1	0.0407011
ebi-a-GCST90002029	ieu-b-85.vcf	CD39 on CD39+ CD8+ T cell	1.28648	1	0.256697
ebi-a-GCST90002054	ieu-b-85.vcf	CD8 on Central Memory CD8+ T cell	0.671229	1	0.412624
ebi-a-GCST90002054	ieu-b-85.vcf	CD8 on Central Memory CD8+ T cell	7.54942	2	0.0229438
ebi-a-GCST90002061	ieu-b-85.vcf	CD4 on CD39+ CD4+ T cell	11.6043	4	0.0205495
ebi-a-GCST90002061	ieu-b-85.vcf	CD4 on CD39+ CD4+ T cell	12.2857	5	0.0310765
ebi-a-GCST90002121	ieu-b-85.vcf	CD8 on CD39+ CD8+ T cell	4.53093	3	0.209548
ebi-a-GCST90002121	ieu-b-85.vcf	CD8 on CD39+ CD8+ T cell	4.58575	4	0.332501
ebi-a-GCST90001462	ieu-b-85.vcf	CD62L- Dendritic Cell Absolute Count	2.59607	3	0.458179
ebi-a-GCST90001462	ieu-b-85.vcf	CD62L- Dendritic Cell Absolute Count	2.62824	4	0.621829
ebi-a-GCST90001482	ieu-b-85.vcf	Resting CD4 regulatory T cell %CD4+ T cell	4.78111	4	0.310503
ebi-a-GCST90001482	ieu-b-85.vcf	Resting CD4 regulatory T cell %CD4+ T cell	5.14889	5	0.397981
ebi-a-GCST90001485	ieu-b-85.vcf	CD39+ resting CD4 regulatory T cell %CD4 regulatory T cell	9.44915	10	0.490072
ebi-a-GCST90001485	ieu-b-85.vcf	CD39+ resting CD4 regulatory T cell %CD4 regulatory T cell	10.5264	11	0.483746
ebi-a-GCST90001503	ieu-b-85.vcf	Activated & secreting CD4 regulatory T cell %CD4+ T cell	15.1804	7	0.0337557
ebi-a-GCST90001503	ieu-b-85.vcf	Activated & secreting CD4 regulatory T cell %CD4+ T cell	19.1786	8	0.0139333
ebi-a-GCST90001512	ieu-b-85.vcf	CD25++ CD45RA- CD4 not regulatory T cell %T cell	0.210638	1	0.646268
ebi-a-GCST90001512	ieu-b-85.vcf	CD25++ CD45RA- CD4 not regulatory T cell %T cell	2.07777	2	0.353849
ebi-a-GCST90001524	ieu-b-85.vcf	Granulocytic Myeloid-Derived Suppressor Cells Absolute Count	0.0184581	1	0.891931
ebi-a-GCST90001543	ieu-b-85.vcf	Effector Memory CD4+ T cell %CD4+ T cell	0.179916	1	0.671445
ebi-a-GCST90001551	ieu-b-85.vcf	Naive CD8+ T cell Absolute Count	0.486446	1	0.485517
ebi-a-GCST90001584	ieu-b-85.vcf	CD14- CD16+ monocyte %monocyte	1.22315	1	0.268743
ebi-a-GCST90001613	ieu-b-85.vcf	CD4-CD8- T cell %leukocyte	1.71795	1	0.189957
ebi-a-GCST90001613	ieu-b-85.vcf	CD4-CD8- T cell %leukocyte	2.58574	2	0.274482
ebi-a-GCST90001628	ieu-b-85.vcf	HLA DR+ CD8+ T cell %T cell	0.0388381	2	0.980768
ebi-a-GCST90001628	ieu-b-85.vcf	HLA DR+ CD8+ T cell %T cell	0.359513	3	0.948473
ebi-a-GCST90001643	ieu-b-85.vcf	B cell %CD3- lymphocyte	2.69102	1	0.100915
ebi-a-GCST90001643	ieu-b-85.vcf	B cell %CD3- lymphocyte	2.80352	2	0.246163
ebi-a-GCST90001661	ieu-b-85.vcf	CD28- CD8dim T cell %T cell	0.00703052	1	0.933177
ebi-a-GCST90001661	ieu-b-85.vcf	CD28- CD8dim T cell %T cell	0.568823	2	0.752457
ebi-a-GCST90001690	ieu-b-85.vcf	CD28+ CD45RA+ CD8+ T cell Absolute Count	3.35718	1	0.0669127
ebi-a-GCST90001747	ieu-b-85.vcf	CD20 on IgD+ CD24- B cell	1.27511	1	0.25881
ebi-a-GCST90001755	ieu-b-85.vcf	CD20 on IgD- CD38- B cell	0.50226	2	0.777921
ebi-a-GCST90001755	ieu-b-85.vcf	CD20 on IgD- CD38- B cell	4.3808	3	0.223172
ebi-a-GCST90001759	ieu-b-85.vcf	CD20 on naive-mature B cell	1.18023	2	0.554264
ebi-a-GCST90001759	ieu-b-85.vcf	CD20 on naive-mature B cell	1.2096	3	0.750704
ebi-a-GCST90001783	ieu-b-85.vcf	CD25 on IgD+ CD38+ B cell	0.0136607	1	0.906956
ebi-a-GCST90001783	ieu-b-85.vcf	CD25 on IgD+ CD38+ B cell	0.0137162	2	0.993165
ebi-a-GCST90001789	ieu-b-85.vcf	CD25 on IgD- CD38dim B cell	0.753652	1	0.385322
ebi-a-GCST90001789	ieu-b-85.vcf	CD25 on IgD- CD38dim B cell	0.998164	2	0.607088
ebi-a-GCST90001793	ieu-b-85.vcf	CD25 on switched memory B cell	1.60829	1	0.204732
ebi-a-GCST90001793	ieu-b-85.vcf	CD25 on switched memory B cell	1.99082	2	0.369572
ebi-a-GCST90001794	ieu-b-85.vcf	CD25 on IgD+ B cell	1.42476	1	0.232622
ebi-a-GCST90001839	ieu-b-85.vcf	CD3 on Effector Memory CD8+ T cell	1.59837	1	0.206134
ebi-a-GCST90001839	ieu-b-85.vcf	CD3 on Effector Memory CD8+ T cell	1.80313	2	0.405934
ebi-a-GCST90001840	ieu-b-85.vcf	CD3 on Terminally Differentiated CD8+ T cell	1.18582	1	0.276175
ebi-a-GCST90001981	ieu-b-85.vcf	CD40 on CD14+ CD16+ monocyte	8.19171	3	0.0422115
ebi-a-GCST90001981	ieu-b-85.vcf	CD40 on CD14+ CD16+ monocyte	8.21885	4	0.0838824
ebi-a-GCST90001991	ieu-b-85.vcf	HLA DR on CD14+ monocyte	16.5311	1	4.78595e-05
ebi-a-GCST90001991	ieu-b-85.vcf	HLA DR on CD14+ monocyte	17.8156	2	0.00013533
ebi-a-GCST90001997	ieu-b-85.vcf	CX3CR1 on CD14+ CD16- monocyte	0.0870601	1	0.767948
ebi-a-GCST90001997	ieu-b-85.vcf	CX3CR1 on CD14+ CD16- monocyte	0.53261	2	0.766205
ebi-a-GCST90002055	ieu-b-85.vcf	CD8 on naive CD8+ T cell	0.564373	1	0.452504
ebi-a-GCST90002055	ieu-b-85.vcf	CD8 on naive CD8+ T cell	10.3283	2	0.00571804
ebi-a-GCST90002109	ieu-b-85.vcf	HLA DR on CD33+ HLA DR+ CD14dim	0.0238255	1	0.87733
ebi-a-GCST90002109	ieu-b-85.vcf	HLA DR on CD33+ HLA DR+ CD14dim	0.0311606	2	0.98454
ebi-a-GCST90002116	ieu-b-85.vcf	HLA DR on B cell	13.4278	6	0.0367236
ebi-a-GCST90002116	ieu-b-85.vcf	HLA DR on B cell	13.4562	7	0.061743
ebi-a-GCST90001426	ieu-b-85.vcf	IgD- CD38dim B cell %lymphocyte	0.981076	1	0.321933
ebi-a-GCST90001450	ieu-b-85.vcf	CD62L- monocyte Absolute Count	0.428974	1	0.512493
ebi-a-GCST90001497	ieu-b-85.vcf	CD39+ secreting CD4 regulatory T cell %CD4 regulatory T cell	1.76489	5	0.880626
ebi-a-GCST90001497	ieu-b-85.vcf	CD39+ secreting CD4 regulatory T cell %CD4 regulatory T cell	2.21265	6	0.899139
ebi-a-GCST90001510	ieu-b-85.vcf	CD25++ CD45RA- CD4 not regulatory T cell Absolute Count	3.78143	1	0.0518244
ebi-a-GCST90001516	ieu-b-85.vcf	Immature Myeloid-Derived Suppressor Cells %CD33dim HLA DR- CD66b-	2.40084	1	0.12127
ebi-a-GCST90001559	ieu-b-85.vcf	Terminally Differentiated CD8+ T cell %T cell	0.909676	1	0.3402
ebi-a-GCST90001574	ieu-b-85.vcf	Terminally Differentiated CD4-CD8- T cell %T cell	1.77384	1	0.182907
ebi-a-GCST90001574	ieu-b-85.vcf	Terminally Differentiated CD4-CD8- T cell %T cell	3.03364	2	0.219409
ebi-a-GCST90001627	ieu-b-85.vcf	HLA DR+ CD8+ T cell Absolute Count	0.0355856	2	0.982365
ebi-a-GCST90001627	ieu-b-85.vcf	HLA DR+ CD8+ T cell Absolute Count	0.551857	3	0.90736
ebi-a-GCST90001637	ieu-b-85.vcf	CD4-CD8- Natural Killer T %T cell	4.23453	4	0.375196
ebi-a-GCST90001637	ieu-b-85.vcf	CD4-CD8- Natural Killer T %T cell	4.23622	5	0.515932
ebi-a-GCST90001666	ieu-b-85.vcf	CD28+ CD45RA+ CD8dim T cell Absolute Count	7.61714	6	0.267515
ebi-a-GCST90001666	ieu-b-85.vcf	CD28+ CD45RA+ CD8dim T cell Absolute Count	8.31394	7	0.305727
ebi-a-GCST90001699	ieu-b-85.vcf	CD45RA+ CD28- CD8+ T cell %CD8+ T cell	1.90384	1	0.167649
ebi-a-GCST90001700	ieu-b-85.vcf	CD45RA+ CD28- CD8+ T cell %T cell	59.6443	62	0.561268
ebi-a-GCST90001700	ieu-b-85.vcf	CD45RA+ CD28- CD8+ T cell %T cell	60.3906	63	0.569897
ebi-a-GCST90001711	ieu-b-85.vcf	BAFF-R on IgD- CD27- B cell	30.7531	9	0.000326321
ebi-a-GCST90001711	ieu-b-85.vcf	BAFF-R on IgD- CD27- B cell	30.9839	10	0.000590337
ebi-a-GCST90001713	ieu-b-85.vcf	BAFF-R on IgD- CD38+ B cell	1.72158	1	0.18949
ebi-a-GCST90001713	ieu-b-85.vcf	BAFF-R on IgD- CD38+ B cell	1.99749	2	0.368341
ebi-a-GCST90001777	ieu-b-85.vcf	CD25 on CD24+ CD27+ B cell	3.18451	2	0.203466
ebi-a-GCST90001777	ieu-b-85.vcf	CD25 on CD24+ CD27+ B cell	4.80961	3	0.186281
ebi-a-GCST90001802	ieu-b-85.vcf	CD27 on IgD- CD38- B cell	2.35421	5	0.798273
ebi-a-GCST90001802	ieu-b-85.vcf	CD27 on IgD- CD38- B cell	2.61968	6	0.85484
ebi-a-GCST90001824	ieu-b-85.vcf	IgD on IgD+ CD38+ B cell	10.9842	4	0.0267418
ebi-a-GCST90001824	ieu-b-85.vcf	IgD on IgD+ CD38+ B cell	10.9845	5	0.0516891
ebi-a-GCST90001855	ieu-b-85.vcf	CD3 on secreting CD4 regulatory T cell	3.47209	1	0.0624124
ebi-a-GCST90001855	ieu-b-85.vcf	CD3 on secreting CD4 regulatory T cell	3.63393	2	0.162518
ebi-a-GCST90001885	ieu-b-85.vcf	CD16-CD56 on HLA DR+ Natural Killer	0.898816	1	0.343099
ebi-a-GCST90001898	ieu-b-85.vcf	CD28 on CD4+ T cell	0.00162312	1	0.967864
ebi-a-GCST90001901	ieu-b-85.vcf	CD28 on CD39+ resting CD4 regulatory T cell	1.41827	1	0.233688
ebi-a-GCST90001992	ieu-b-85.vcf	CCR2 on CD14+ CD16+ monocyte	0.659364	1	0.416785
ebi-a-GCST90002004	ieu-b-85.vcf	CCR2 on CD14+ CD16- monocyte	0.0458658	1	0.83042
ebi-a-GCST90002004	ieu-b-85.vcf	CCR2 on CD14+ CD16- monocyte	0.062904	2	0.969037
ebi-a-GCST90002059	ieu-b-85.vcf	CD8 on Natural Killer T	6.32033	1	0.0119362
ebi-a-GCST90002090	ieu-b-85.vcf	CD11c on granulocyte	0.13855	2	0.93307
ebi-a-GCST90002090	ieu-b-85.vcf	CD11c on granulocyte	2.14142	3	0.543579
ebi-a-GCST90002102	ieu-b-85.vcf	CD45RA on resting CD4 regulatory T cell	8.3566	4	0.0793551
ebi-a-GCST90002102	ieu-b-85.vcf	CD45RA on resting CD4 regulatory T cell	9.22376	5	0.100465
ebi-a-GCST90002118	ieu-b-85.vcf	CD8 on CD28+ CD45RA- CD8+ T cell	0.411687	1	0.521115
ebi-a-GCST90001471	ieu-b-85.vcf	CD62L- plasmacytoid Dendritic Cell %Dendritic Cell	0.731378	1	0.392437
ebi-a-GCST90001473	ieu-b-85.vcf	CD62L- CD86+ myeloid Dendritic Cell %Dendritic Cell	2.92501	4	0.570452
ebi-a-GCST90001473	ieu-b-85.vcf	CD62L- CD86+ myeloid Dendritic Cell %Dendritic Cell	2.93293	5	0.710326
ebi-a-GCST90001511	ieu-b-85.vcf	CD25++ CD45RA- CD4 not regulatory T cell %CD4+ T cell	0.230786	1	0.630941
ebi-a-GCST90001511	ieu-b-85.vcf	CD25++ CD45RA- CD4 not regulatory T cell %CD4+ T cell	2.24941	2	0.324749
ebi-a-GCST90001514	ieu-b-85.vcf	Hematopoietic Stem Cell Absolute Count	0.0389373	1	0.843573
ebi-a-GCST90001541	ieu-b-85.vcf	Naive CD4+ T cell %CD4+ T cell	6.6637	2	0.035727
ebi-a-GCST90001541	ieu-b-85.vcf	Naive CD4+ T cell %CD4+ T cell	6.92645	3	0.0742794
ebi-a-GCST90001603	ieu-b-85.vcf	T cell Absolute Count	0.359277	1	0.548908
ebi-a-GCST90001624	ieu-b-85.vcf	HLA DR+ CD4+ T cell Absolute Count	0.43498	1	0.509555
ebi-a-GCST90001702	ieu-b-85.vcf	BAFF-R on CD24+ CD27+ B cell	23.966	8	0.00232207
ebi-a-GCST90001702	ieu-b-85.vcf	BAFF-R on CD24+ CD27+ B cell	25.152	9	0.00280751
ebi-a-GCST90001718	ieu-b-85.vcf	BAFF-R on switched memory B cell	26.3115	9	0.0018164
ebi-a-GCST90001718	ieu-b-85.vcf	BAFF-R on switched memory B cell	26.3169	10	0.00333661
ebi-a-GCST90001719	ieu-b-85.vcf	BAFF-R on IgD+ B cell	13.9201	7	0.0526201
ebi-a-GCST90001719	ieu-b-85.vcf	BAFF-R on IgD+ B cell	14.3052	8	0.0741488
ebi-a-GCST90001735	ieu-b-85.vcf	CD19 on IgD- CD38dim B cell	0.162807	1	0.686585
ebi-a-GCST90001740	ieu-b-85.vcf	CD19 on switched memory B cell	0.18254	1	0.669199
ebi-a-GCST90001775	ieu-b-85.vcf	CD25 on B cell	1.43304	1	0.231268
ebi-a-GCST90001775	ieu-b-85.vcf	CD25 on B cell	1.52841	2	0.465704
ebi-a-GCST90001779	ieu-b-85.vcf	CD25 on IgD+ CD24- B cell	0.636808	2	0.727309
ebi-a-GCST90001779	ieu-b-85.vcf	CD25 on IgD+ CD24- B cell	1.01973	3	0.796478
ebi-a-GCST90001827	ieu-b-85.vcf	IgD on IgD+ B cell	2.00248	1	0.157043
ebi-a-GCST90001832	ieu-b-85.vcf	CD62L on CD62L+ plasmacytoid Dendritic Cell	2.17718	2	0.336691
ebi-a-GCST90001832	ieu-b-85.vcf	CD62L on CD62L+ plasmacytoid Dendritic Cell	2.95801	3	0.398145
ebi-a-GCST90001947	ieu-b-85.vcf	CD33 on CD33+ HLA DR+ CD14dim	1.96184	2	0.374965
ebi-a-GCST90001947	ieu-b-85.vcf	CD33 on CD33+ HLA DR+ CD14dim	2.06216	3	0.559607
ebi-a-GCST90001964	ieu-b-85.vcf	FSC-A on plasmacytoid Dendritic Cell	0.504822	2	0.776925
ebi-a-GCST90001964	ieu-b-85.vcf	FSC-A on plasmacytoid Dendritic Cell	0.884063	3	0.829272
ebi-a-GCST90001970	ieu-b-85.vcf	FSC-A on HLA DR+ Natural Killer	1.01378	2	0.602367
ebi-a-GCST90001970	ieu-b-85.vcf	FSC-A on HLA DR+ Natural Killer	2.60963	3	0.455804
ebi-a-GCST90001994	ieu-b-85.vcf	CX3CR1 on CD14- CD16-	0.00467827	1	0.945469
ebi-a-GCST90001994	ieu-b-85.vcf	CX3CR1 on CD14- CD16-	1.46811	2	0.479959
ebi-a-GCST90001995	ieu-b-85.vcf	CX3CR1 on monocyte	0.0579859	1	0.809708
ebi-a-GCST90001995	ieu-b-85.vcf	CX3CR1 on monocyte	0.632056	2	0.729039
ebi-a-GCST90001999	ieu-b-85.vcf	PDL-1 on CD14- CD16+ monocyte	2.06466	1	0.150749
ebi-a-GCST90002011	ieu-b-85.vcf	CD64 on CD14+ CD16+ monocyte	0.0570145	1	0.811278
ebi-a-GCST90002045	ieu-b-85.vcf	CD45 on CD33- HLA DR-	0.99369	1	0.318842
ebi-a-GCST90002046	ieu-b-85.vcf	CD45 on CD33- HLA DR+	1.59518	1	0.206587
ebi-a-GCST90002072	ieu-b-85.vcf	SSC-A on plasmacytoid Dendritic Cell	1.013	2	0.602601
ebi-a-GCST90002072	ieu-b-85.vcf	SSC-A on plasmacytoid Dendritic Cell	1.38231	3	0.709687
ebi-a-GCST90002077	ieu-b-85.vcf	SSC-A on HLA DR+ Natural Killer	0.0594018	1	0.807444
ebi-a-GCST90002077	ieu-b-85.vcf	SSC-A on HLA DR+ Natural Killer	1.28659	2	0.525558
ebi-a-GCST90001486	ieu-b-85.vcf	Activated CD4 regulatory T cell Absolute Count	4.0493	1	0.0441898
ebi-a-GCST90001493	ieu-b-85.vcf	Secreting CD4 regulatory T cell %CD4 regulatory T cell	1.85172	3	0.603746
ebi-a-GCST90001493	ieu-b-85.vcf	Secreting CD4 regulatory T cell %CD4 regulatory T cell	1.90555	4	0.753126
ebi-a-GCST90001499	ieu-b-85.vcf	Activated & resting CD4 regulatory T cell %CD4 regulatory T cell	1.86019	3	0.601926
ebi-a-GCST90001499	ieu-b-85.vcf	Activated & resting CD4 regulatory T cell %CD4 regulatory T cell	1.91855	4	0.750736
ebi-a-GCST90001502	ieu-b-85.vcf	Activated & secreting CD4 regulatory T cell %CD4 regulatory T cell	4.88301	5	0.430324
ebi-a-GCST90001502	ieu-b-85.vcf	Activated & secreting CD4 regulatory T cell %CD4 regulatory T cell	5.02498	6	0.540613
ebi-a-GCST90001562	ieu-b-85.vcf	CD45RA+ CD8+ T cell %T cell	1.03755	1	0.308391
ebi-a-GCST90001620	ieu-b-85.vcf	HLA DR+ T cell%lymphocyte	2.60643	3	0.456363
ebi-a-GCST90001620	ieu-b-85.vcf	HLA DR+ T cell%lymphocyte	2.91623	4	0.571941
ebi-a-GCST90001629	ieu-b-85.vcf	HLA DR+ CD8+ T cell %lymphocyte	0.0358345	1	0.849858
ebi-a-GCST90001629	ieu-b-85.vcf	HLA DR+ CD8+ T cell %lymphocyte	0.16646	2	0.920139
ebi-a-GCST90001638	ieu-b-85.vcf	CD4-CD8- Natural Killer T %lymphocyte	4.27409	5	0.510666
ebi-a-GCST90001638	ieu-b-85.vcf	CD4-CD8- Natural Killer T %lymphocyte	4.35647	6	0.628556
ebi-a-GCST90001654	ieu-b-85.vcf	CD28- CD4-CD8- T cell Absolute Count	1.23996	1	0.265479
ebi-a-GCST90001760	ieu-b-85.vcf	CD20 on unswitched memory B cell	0.569325	2	0.752268
ebi-a-GCST90001760	ieu-b-85.vcf	CD20 on unswitched memory B cell	2.49416	3	0.476347
ebi-a-GCST90001786	ieu-b-85.vcf	CD25 on IgD- CD27- B cell	0.0442031	1	0.833476
ebi-a-GCST90001790	ieu-b-85.vcf	CD25 on memory B cell	2.92748	2	0.231369
ebi-a-GCST90001790	ieu-b-85.vcf	CD25 on memory B cell	4.80256	3	0.186839
ebi-a-GCST90001808	ieu-b-85.vcf	CD27 on switched memory B cell	2.70466	6	0.844896
ebi-a-GCST90001808	ieu-b-85.vcf	CD27 on switched memory B cell	2.74851	7	0.907252
ebi-a-GCST90001811	ieu-b-85.vcf	CD38 on IgD+ CD24- B cell	0.00177754	1	0.96637
ebi-a-GCST90001812	ieu-b-85.vcf	CD38 on IgD+ CD38+ B cell	1.18522	1	0.276295
ebi-a-GCST90001812	ieu-b-85.vcf	CD38 on IgD+ CD38+ B cell	1.19007	2	0.551544
ebi-a-GCST90001815	ieu-b-85.vcf	CD38 on IgD- CD38dim B cell	0.00750538	1	0.930963
ebi-a-GCST90001815	ieu-b-85.vcf	CD38 on IgD- CD38dim B cell	0.378507	2	0.827577
ebi-a-GCST90001819	ieu-b-85.vcf	CD38 on transitional B cell	0.77142	3	0.85629
ebi-a-GCST90001819	ieu-b-85.vcf	CD38 on transitional B cell	1.93238	4	0.748194
ebi-a-GCST90001820	ieu-b-85.vcf	IgD on IgD+ CD24+ B cell	6.81508	3	0.0780312
ebi-a-GCST90001820	ieu-b-85.vcf	IgD on IgD+ CD24+ B cell	8.99532	4	0.0612166
ebi-a-GCST90001838	ieu-b-85.vcf	CD3 on naive CD8+ T cell	13.6625	4	0.00845376
ebi-a-GCST90001838	ieu-b-85.vcf	CD3 on naive CD8+ T cell	13.7044	5	0.0176003
ebi-a-GCST90001845	ieu-b-85.vcf	CD3 on CD45RA- CD4+ T cell	1.82003	1	0.17731
ebi-a-GCST90001845	ieu-b-85.vcf	CD3 on CD45RA- CD4+ T cell	3.42094	2	0.18078
ebi-a-GCST90001886	ieu-b-85.vcf	CD28 on CD39+ activated CD4 regulatory T cell	0.0377069	1	0.846033
ebi-a-GCST90001910	ieu-b-85.vcf	CD45 on B cell	0.000667835	1	0.979383
ebi-a-GCST90001948	ieu-b-85.vcf	CD33 on CD33dim HLA DR+ CD11b+	6.04587	5	0.301781
ebi-a-GCST90001948	ieu-b-85.vcf	CD33 on CD33dim HLA DR+ CD11b+	10.1858	6	0.117041
ebi-a-GCST90001951	ieu-b-85.vcf	CD33 on CD66b++ myeloid cell	2.66693	2	0.263562
ebi-a-GCST90001951	ieu-b-85.vcf	CD33 on CD66b++ myeloid cell	4.40539	3	0.220886
ebi-a-GCST90002014	ieu-b-85.vcf	CCR2 on CD62L+ myeloid Dendritic Cell	1.59137	1	0.20713
ebi-a-GCST90002014	ieu-b-85.vcf	CCR2 on CD62L+ myeloid Dendritic Cell	2.6018	2	0.272287
ebi-a-GCST90002032	ieu-b-85.vcf	CD39 on CD39+ CD4+ T cell	3.16472	3	0.36692
ebi-a-GCST90002032	ieu-b-85.vcf	CD39 on CD39+ CD4+ T cell	4.1055	4	0.391917
ebi-a-GCST90002034	ieu-b-85.vcf	CD39 on monocyte	0.145485	1	0.702887
ebi-a-GCST90002039	ieu-b-85.vcf	CD80 on monocyte	1.74473	4	0.782577
ebi-a-GCST90002039	ieu-b-85.vcf	CD80 on monocyte	2.21603	5	0.818517
ebi-a-GCST90002066	ieu-b-85.vcf	CD4 on activated CD4 regulatory T cell	14.3018	1	0.000155713
ebi-a-GCST90002074	ieu-b-85.vcf	SSC-A on CD14+ monocyte	0.176788	3	0.981247
ebi-a-GCST90002074	ieu-b-85.vcf	SSC-A on CD14+ monocyte	5.2365	4	0.26388
ebi-a-GCST90002111	ieu-b-85.vcf	HLA DR on CD33dim HLA DR+ CD11b-	6.06307	2	0.0482415
ebi-a-GCST90002111	ieu-b-85.vcf	HLA DR on CD33dim HLA DR+ CD11b-	7.16568	3	0.0668004
ebi-a-GCST90001432	ieu-b-85.vcf	Unswitched memory B cell %lymphocyte	3.09463	2	0.212819
ebi-a-GCST90001432	ieu-b-85.vcf	Unswitched memory B cell %lymphocyte	3.70092	3	0.295623
ebi-a-GCST90001459	ieu-b-85.vcf	Myeloid Dendritic Cell %Dendritic Cell	0.339496	1	0.56012
ebi-a-GCST90001460	ieu-b-85.vcf	Plasmacytoid Dendritic Cell Absolute Count	0.644773	1	0.421988
ebi-a-GCST90001494	ieu-b-85.vcf	Secreting CD4 regulatory T cell %CD4+ T cell	12.7316	5	0.0260278
ebi-a-GCST90001494	ieu-b-85.vcf	Secreting CD4 regulatory T cell %CD4+ T cell	13.7554	6	0.0324913
ebi-a-GCST90001509	ieu-b-85.vcf	CD25++ CD45RA+ CD4 not regulatory T cell %T cell	2.2388	2	0.326475
ebi-a-GCST90001509	ieu-b-85.vcf	CD25++ CD45RA+ CD4 not regulatory T cell %T cell	4.46719	3	0.215235
ebi-a-GCST90001558	ieu-b-85.vcf	Terminally Differentiated CD8+ T cell %CD8+ T cell	2.83546	1	0.0922047
ebi-a-GCST90001558	ieu-b-85.vcf	Terminally Differentiated CD8+ T cell %CD8+ T cell	2.92041	2	0.232189
ebi-a-GCST90001621	ieu-b-85.vcf	Natural Killer T Absolute Count	1.51811	3	0.678096
ebi-a-GCST90001621	ieu-b-85.vcf	Natural Killer T Absolute Count	2.19806	4	0.699384
ebi-a-GCST90001645	ieu-b-85.vcf	Natural Killer Absolute Count	0.0741455	1	0.785394
ebi-a-GCST90001645	ieu-b-85.vcf	Natural Killer Absolute Count	0.0860052	2	0.957909
ebi-a-GCST90001660	ieu-b-85.vcf	CD39+ CD4+ T cell Absolute Count	0.783084	3	0.853509
ebi-a-GCST90001660	ieu-b-85.vcf	CD39+ CD4+ T cell Absolute Count	1.31692	4	0.858498
ebi-a-GCST90001697	ieu-b-85.vcf	CD45RA- CD28- CD8+ T cell %T cell	29.9554	35	0.710153
ebi-a-GCST90001697	ieu-b-85.vcf	CD45RA- CD28- CD8+ T cell %T cell	30.9477	36	0.70753
ebi-a-GCST90001703	ieu-b-85.vcf	BAFF-R on IgD+ CD24+ B cell	8.28754	5	0.141085
ebi-a-GCST90001703	ieu-b-85.vcf	BAFF-R on IgD+ CD24+ B cell	10.3714	6	0.109857
ebi-a-GCST90001715	ieu-b-85.vcf	BAFF-R on memory B cell	18.8366	7	0.00871488
ebi-a-GCST90001715	ieu-b-85.vcf	BAFF-R on memory B cell	20.8677	8	0.00750722
ebi-a-GCST90001725	ieu-b-85.vcf	CD19 on IgD+ CD24- B cell	3.34042	2	0.188207
ebi-a-GCST90001725	ieu-b-85.vcf	CD19 on IgD+ CD24- B cell	4.37301	3	0.223901
ebi-a-GCST90001742	ieu-b-85.vcf	CD19 on transitional B cell	0.683457	2	0.710541
ebi-a-GCST90001742	ieu-b-85.vcf	CD19 on transitional B cell	3.6781	3	0.298387
ebi-a-GCST90001761	ieu-b-85.vcf	CD20 on switched memory B cell	3.0745	4	0.545436
ebi-a-GCST90001761	ieu-b-85.vcf	CD20 on switched memory B cell	5.20086	5	0.391862
ebi-a-GCST90001780	ieu-b-85.vcf	CD25 on IgD+ CD38- B cell	0.00517009	1	0.942679
ebi-a-GCST90001800	ieu-b-85.vcf	CD27 on IgD+ CD24+ B cell	2.58506	4	0.629472
ebi-a-GCST90001800	ieu-b-85.vcf	CD27 on IgD+ CD24+ B cell	3.24589	5	0.662135
ebi-a-GCST90001805	ieu-b-85.vcf	CD27 on memory B cell	2.20256	4	0.698561
ebi-a-GCST90001805	ieu-b-85.vcf	CD27 on memory B cell	2.51569	5	0.77413
ebi-a-GCST90001828	ieu-b-85.vcf	IgD on transitional B cell	6.43009	3	0.0924607
ebi-a-GCST90001828	ieu-b-85.vcf	IgD on transitional B cell	8.78237	4	0.0667754
ebi-a-GCST90001854	ieu-b-85.vcf	CD3 on CD39+ activated CD4 regulatory T cell	1.42154	2	0.491265
ebi-a-GCST90001854	ieu-b-85.vcf	CD3 on CD39+ activated CD4 regulatory T cell	4.92498	3	0.177374
ebi-a-GCST90001870	ieu-b-85.vcf	CD34 on Hematopoietic Stem Cell	4.49859	1	0.0339229
ebi-a-GCST90001870	ieu-b-85.vcf	CD34 on Hematopoietic Stem Cell	7.0922	2	0.0288368
ebi-a-GCST90001949	ieu-b-85.vcf	CD33 on CD33dim HLA DR+ CD11b-	3.91347	5	0.56194
ebi-a-GCST90001949	ieu-b-85.vcf	CD33 on CD33dim HLA DR+ CD11b-	8.46928	6	0.205698
ebi-a-GCST90001988	ieu-b-85.vcf	HLA DR on CD14+ CD16- monocyte	16.6904	1	4.4004e-05
ebi-a-GCST90001988	ieu-b-85.vcf	HLA DR on CD14+ CD16- monocyte	17.8157	2	0.000135326
ebi-a-GCST90001996	ieu-b-85.vcf	CX3CR1 on CD14+ CD16+ monocyte	0.128366	1	0.720132
ebi-a-GCST90001996	ieu-b-85.vcf	CX3CR1 on CD14+ CD16+ monocyte	1.07087	2	0.585416
ebi-a-GCST90002031	ieu-b-85.vcf	CD39 on CD39+ secreting CD4 regulatory T cell	3.54252	4	0.471443
ebi-a-GCST90002031	ieu-b-85.vcf	CD39 on CD39+ secreting CD4 regulatory T cell	4.2445	5	0.514777
ebi-a-GCST90002035	ieu-b-85.vcf	CD80 on myeloid Dendritic Cell	1.72151	2	0.422843
ebi-a-GCST90002035	ieu-b-85.vcf	CD80 on myeloid Dendritic Cell	3.23792	3	0.356376
ebi-a-GCST90002040	ieu-b-85.vcf	CD80 on granulocyte	1.05866	1	0.30352
ebi-a-GCST90002040	ieu-b-85.vcf	CD80 on granulocyte	1.64671	2	0.438956
ebi-a-GCST90002067	ieu-b-85.vcf	CD4 on CD39+ activated CD4 regulatory T cell	0.969336	1	0.324846
ebi-a-GCST90002067	ieu-b-85.vcf	CD4 on CD39+ activated CD4 regulatory T cell	14.0227	2	0.000901587
ebi-a-GCST90002099	ieu-b-85.vcf	CD4RA on Terminally Differentiated CD4+ T cell	2.05534	1	0.151673
ebi-a-GCST90002099	ieu-b-85.vcf	CD4RA on Terminally Differentiated CD4+ T cell	3.58591	2	0.166467
ebi-a-GCST90002105	ieu-b-85.vcf	HLA DR on plasmacytoid Dendritic Cell	2.54775	6	0.863086
ebi-a-GCST90002105	ieu-b-85.vcf	HLA DR on plasmacytoid Dendritic Cell	2.72241	7	0.90944
ebi-a-GCST90001472	ieu-b-85.vcf	CD62L- CD86+ myeloid Dendritic Cell Absolute Count	2.50479	4	0.643778
ebi-a-GCST90001472	ieu-b-85.vcf	CD62L- CD86+ myeloid Dendritic Cell Absolute Count	2.50636	5	0.775537
ebi-a-GCST90001475	ieu-b-85.vcf	HLA DR++ monocyte %monocyte	0.0226513	1	0.880367
ebi-a-GCST90001475	ieu-b-85.vcf	HLA DR++ monocyte %monocyte	1.57323	2	0.455384
ebi-a-GCST90001501	ieu-b-85.vcf	Activated & secreting CD4 regulatory T cell Absolute Count	3.39744	2	0.182918
ebi-a-GCST90001501	ieu-b-85.vcf	Activated & secreting CD4 regulatory T cell Absolute Count	6.17828	3	0.103251
ebi-a-GCST90001508	ieu-b-85.vcf	CD25++ CD45RA+ CD4 not regulatory T cell %CD4+ T cell	2.20838	2	0.33148
ebi-a-GCST90001508	ieu-b-85.vcf	CD25++ CD45RA+ CD4 not regulatory T cell %CD4+ T cell	4.46092	3	0.215803
ebi-a-GCST90001520	ieu-b-85.vcf	CD33+ HLA DR+ CD14dim Absolute Count	2.56237	1	0.109434
ebi-a-GCST90001526	ieu-b-85.vcf	CD33dim HLA DR+ CD11b+ %CD33dim HLA DR+	0.355219	1	0.551173
ebi-a-GCST90001526	ieu-b-85.vcf	CD33dim HLA DR+ CD11b+ %CD33dim HLA DR+	1.32664	2	0.515139
ebi-a-GCST90001536	ieu-b-85.vcf	CD45RA- CD4+ T cell %T cell	1.81035	1	0.178466
ebi-a-GCST90001588	ieu-b-85.vcf	T/B cell	0.542442	1	0.461422
ebi-a-GCST90001630	ieu-b-85.vcf	CD8+ Natural Killer T Absolute Count	4.24815	1	0.0392932
ebi-a-GCST90001648	ieu-b-85.vcf	HLA DR+ Natural Killer Absolute Count	0.292379	1	0.5887
ebi-a-GCST90001648	ieu-b-85.vcf	HLA DR+ Natural Killer Absolute Count	0.466342	2	0.792018
ebi-a-GCST90001670	ieu-b-85.vcf	CD39+ CD8+ T cell %T cell	19.882	5	0.00131508
ebi-a-GCST90001670	ieu-b-85.vcf	CD39+ CD8+ T cell %T cell	21.1381	6	0.00173269
ebi-a-GCST90001688	ieu-b-85.vcf	CD28+ CD45RA+ CD8+ T cell %T cell	24.3377	33	0.862798
ebi-a-GCST90001688	ieu-b-85.vcf	CD28+ CD45RA+ CD8+ T cell %T cell	25.2839	34	0.860149
ebi-a-GCST90001710	ieu-b-85.vcf	BAFF-R on IgD- CD24- B cell	30.6753	9	0.000336481
ebi-a-GCST90001710	ieu-b-85.vcf	BAFF-R on IgD- CD24- B cell	30.9466	10	0.000598769
ebi-a-GCST90001720	ieu-b-85.vcf	BAFF-R on transitional B cell	8.31392	5	0.139763
ebi-a-GCST90001720	ieu-b-85.vcf	BAFF-R on transitional B cell	8.43186	6	0.20814
ebi-a-GCST90001751	ieu-b-85.vcf	CD20 on IgD+ CD38+ B cell	4.1486	3	0.245858
ebi-a-GCST90001751	ieu-b-85.vcf	CD20 on IgD+ CD38+ B cell	5.54455	4	0.235841
ebi-a-GCST90001754	ieu-b-85.vcf	CD20 on IgD- CD27- B cell	0.055233	1	0.814196
ebi-a-GCST90001754	ieu-b-85.vcf	CD20 on IgD- CD27- B cell	1.21006	2	0.546057
ebi-a-GCST90001757	ieu-b-85.vcf	CD20 on IgD- CD38dim B cell	3.83237	4	0.429167
ebi-a-GCST90001757	ieu-b-85.vcf	CD20 on IgD- CD38dim B cell	4.77062	5	0.44451
ebi-a-GCST90001781	ieu-b-85.vcf	CD25 on IgD+ CD38- naive B cell	0.0210547	1	0.88463
ebi-a-GCST90001781	ieu-b-85.vcf	CD25 on IgD+ CD38- naive B cell	0.0250252	2	0.987565
ebi-a-GCST90001798	ieu-b-85.vcf	CD27 on CD24+ CD27+ B cell	3.11797	6	0.793901
ebi-a-GCST90001798	ieu-b-85.vcf	CD27 on CD24+ CD27+ B cell	3.47209	7	0.838173
ebi-a-GCST90001804	ieu-b-85.vcf	CD27 on IgD- CD38dim B cell	2.10634	5	0.834244
ebi-a-GCST90001804	ieu-b-85.vcf	CD27 on IgD- CD38dim B cell	2.44709	6	0.874341
ebi-a-GCST90001825	ieu-b-85.vcf	IgD on IgD+ CD38dim B cell	4.21584	3	0.23908
ebi-a-GCST90001825	ieu-b-85.vcf	IgD on IgD+ CD38dim B cell	4.37618	4	0.357483
ebi-a-GCST90001849	ieu-b-85.vcf	CD3 on HLA DR+ CD4+ T cell	0.0647253	1	0.799177
ebi-a-GCST90001863	ieu-b-85.vcf	CD3 on CD28+ CD45RA- CD8+ T cell	6.53483	2	0.0381047
ebi-a-GCST90001863	ieu-b-85.vcf	CD3 on CD28+ CD45RA- CD8+ T cell	9.23539	3	0.0263196
ebi-a-GCST90001883	ieu-b-85.vcf	CD16-CD56 on Natural Killer T	1.81008	3	0.612743
ebi-a-GCST90001883	ieu-b-85.vcf	CD16-CD56 on Natural Killer T	2.62057	4	0.623183
ebi-a-GCST90001907	ieu-b-85.vcf	CCR7 on naive CD4+ T cell	4.41652	2	0.109891
ebi-a-GCST90001907	ieu-b-85.vcf	CCR7 on naive CD4+ T cell	6.98762	3	0.0722934
ebi-a-GCST90001920	ieu-b-85.vcf	CD45 on HLA DR+ CD4+ T cell	0.617689	1	0.431907
ebi-a-GCST90001933	ieu-b-85.vcf	CD25 on CD45RA- CD4 not regulatory T cell	0.0927742	1	0.76068
ebi-a-GCST90001956	ieu-b-85.vcf	CD33 on CD33+ HLA DR+	1.9511	2	0.376985
ebi-a-GCST90001956	ieu-b-85.vcf	CD33 on CD33+ HLA DR+	2.06072	3	0.5599
ebi-a-GCST90001979	ieu-b-85.vcf	CD16 on CD14- CD16+ monocyte	2.05066	7	0.956983
ebi-a-GCST90001979	ieu-b-85.vcf	CD16 on CD14- CD16+ monocyte	2.11815	8	0.977174
ebi-a-GCST90001984	ieu-b-85.vcf	HLA DR on CD14- CD16+ monocyte	19.5492	5	0.00151803
ebi-a-GCST90001984	ieu-b-85.vcf	HLA DR on CD14- CD16+ monocyte	21.391	6	0.00156017
ebi-a-GCST90002073	ieu-b-85.vcf	SSC-A on monocyte	4.22707	5	0.517209
ebi-a-GCST90002073	ieu-b-85.vcf	SSC-A on monocyte	6.86163	6	0.333834
ebi-a-GCST90002084	ieu-b-85.vcf	SSC-A on Natural Killer T	0.677669	1	0.41039
ebi-a-GCST90002098	ieu-b-85.vcf	CD45RA on naive CD4+ T cell	7.34651	8	0.49975
ebi-a-GCST90002098	ieu-b-85.vcf	CD45RA on naive CD4+ T cell	11.6358	9	0.23463
ebi-a-GCST90002108	ieu-b-85.vcf	HLA DR on CD33+ HLA DR+ CD14-	0.00844425	1	0.926783
ebi-a-GCST90002108	ieu-b-85.vcf	HLA DR on CD33+ HLA DR+ CD14-	0.031287	2	0.984478
ebi-a-GCST90002119	ieu-b-85.vcf	CD8 on CD28+ CD45RA+ CD8+ T cell	27.7173	4	1.42316e-05
ebi-a-GCST90002119	ieu-b-85.vcf	CD8 on CD28+ CD45RA+ CD8+ T cell	29.8293	5	1.59347e-05
ebi-a-GCST90001395	ieu-b-85.vcf	IgD+ CD38- B cell %B cell	0.757527	1	0.384103
ebi-a-GCST90001417	ieu-b-85.vcf	CD24+ CD27+ B cell %B cell	0.00331955	1	0.954055
ebi-a-GCST90001417	ieu-b-85.vcf	CD24+ CD27+ B cell %B cell	0.0110331	2	0.994499
ebi-a-GCST90001442	ieu-b-85.vcf	CD24+ CD27+ B cell %lymphocyte	0.272712	1	0.601518
ebi-a-GCST90001442	ieu-b-85.vcf	CD24+ CD27+ B cell %lymphocyte	0.317437	2	0.853237
ebi-a-GCST90001465	ieu-b-85.vcf	CD86+ myeloid Dendritic Cell %Dendritic Cell	0.33863	2	0.844243
ebi-a-GCST90001465	ieu-b-85.vcf	CD86+ myeloid Dendritic Cell %Dendritic Cell	0.421232	3	0.935822
ebi-a-GCST90001469	ieu-b-85.vcf	CD62L- myeloid Dendritic Cell %Dendritic Cell	2.79497	5	0.73156
ebi-a-GCST90001469	ieu-b-85.vcf	CD62L- myeloid Dendritic Cell %Dendritic Cell	2.80598	6	0.832775
ebi-a-GCST90001478	ieu-b-85.vcf	CD4 regulatory T cell %CD4+ T cell	7.02745	1	0.00802694
ebi-a-GCST90001500	ieu-b-85.vcf	Activated & resting CD4 regulatory T cell %CD4+ T cell	0.00092008	1	0.975802
ebi-a-GCST90001500	ieu-b-85.vcf	Activated & resting CD4 regulatory T cell %CD4+ T cell	0.225476	2	0.893385
ebi-a-GCST90001505	ieu-b-85.vcf	CD25++ CD4+ T cell %CD4+ T cell	1.0837	1	0.297871
ebi-a-GCST90001515	ieu-b-85.vcf	Immature Myeloid-Derived Suppressor Cells Absolute Count	1.29188	1	0.255701
ebi-a-GCST90001544	ieu-b-85.vcf	Effector Memory CD4+ T cell %T cell	5.96395	2	0.0506926
ebi-a-GCST90001544	ieu-b-85.vcf	Effector Memory CD4+ T cell %T cell	6.12997	3	0.105455
ebi-a-GCST90001570	ieu-b-85.vcf	Effector Memory CD4-CD8- T cell %CD4-CD8- T cell	2.58737	2	0.274258
ebi-a-GCST90001570	ieu-b-85.vcf	Effector Memory CD4-CD8- T cell %CD4-CD8- T cell	3.36171	3	0.339145
ebi-a-GCST90001580	ieu-b-85.vcf	CD14+ CD16+ monocyte Absolute Count	0.294355	1	0.587443
ebi-a-GCST90001580	ieu-b-85.vcf	CD14+ CD16+ monocyte Absolute Count	2.23095	2	0.32776
ebi-a-GCST90001594	ieu-b-85.vcf	CD4+CD8+ T cell Absolute Count	0.99315	1	0.318974
ebi-a-GCST90001601	ieu-b-85.vcf	Lymphocyte Absolute Count	0.269253	1	0.603833
ebi-a-GCST90001614	ieu-b-85.vcf	CD8+ and CD8dim T cell %leukocyte	2.33718	1	0.126318
ebi-a-GCST90001626	ieu-b-85.vcf	HLA DR+ CD4+ T cell %lymphocyte	0.429801	1	0.512087
ebi-a-GCST90001679	ieu-b-85.vcf	CD25++ CD8+ T cell %T cell	0.387558	1	0.533586
ebi-a-GCST90001694	ieu-b-85.vcf	CD28- CD4-CD8- T cell %T cell	1.83339	1	0.175727
ebi-a-GCST90001704	ieu-b-85.vcf	BAFF-R on IgD+ CD24- B cell	12.8595	7	0.0756071
ebi-a-GCST90001704	ieu-b-85.vcf	BAFF-R on IgD+ CD24- B cell	13.2997	8	0.101944
ebi-a-GCST90001741	ieu-b-85.vcf	CD19 on IgD+ B cell	0.268005	1	0.604673
ebi-a-GCST90001791	ieu-b-85.vcf	CD25 on naive-mature B cell	1.64361	2	0.439637
ebi-a-GCST90001791	ieu-b-85.vcf	CD25 on naive-mature B cell	1.65735	3	0.646457
ebi-a-GCST90001813	ieu-b-85.vcf	CD38 on IgD+ CD38dim B cell	0.478352	2	0.787276
ebi-a-GCST90001813	ieu-b-85.vcf	CD38 on IgD+ CD38dim B cell	0.527134	3	0.912891
ebi-a-GCST90001841	ieu-b-85.vcf	CD3 on Central Memory CD4+ T cell	2.34761	2	0.309188
ebi-a-GCST90001841	ieu-b-85.vcf	CD3 on Central Memory CD4+ T cell	4.30931	3	0.229943
ebi-a-GCST90001869	ieu-b-85.vcf	CD3 on resting CD4 regulatory T cell	1.45239	3	0.693302
ebi-a-GCST90001869	ieu-b-85.vcf	CD3 on resting CD4 regulatory T cell	4.41763	4	0.352426
ebi-a-GCST90001944	ieu-b-85.vcf	CD123 on plasmacytoid Dendritic Cell	1.42266	1	0.232967
ebi-a-GCST90001973	ieu-b-85.vcf	FSC-A on CD4+ T cell	16.6683	1	4.45193e-05
ebi-a-GCST90002013	ieu-b-85.vcf	CCR2 on myeloid Dendritic Cell	1.81136	1	0.178346
ebi-a-GCST90002013	ieu-b-85.vcf	CCR2 on myeloid Dendritic Cell	2.03138	2	0.362152
ebi-a-GCST90002030	ieu-b-85.vcf	CD39 on CD39+ activated CD4 regulatory T cell	3.57708	4	0.466255
ebi-a-GCST90002030	ieu-b-85.vcf	CD39 on CD39+ activated CD4 regulatory T cell	4.24639	5	0.514515
ebi-a-GCST90002110	ieu-b-85.vcf	HLA DR on CD33dim HLA DR+ CD11b+	6.35631	2	0.0416625
ebi-a-GCST90002110	ieu-b-85.vcf	HLA DR on CD33dim HLA DR+ CD11b+	6.35631	3	0.0955047
ebi-a-GCST90001431	ieu-b-85.vcf	IgD+ CD38- B cell %lymphocyte	0.359953	1	0.548532
ebi-a-GCST90001433	ieu-b-85.vcf	IgD- CD27- B cell %lymphocyte	1.45994	1	0.22694
ebi-a-GCST90001436	ieu-b-85.vcf	Memory B cell %lymphocyte	0.70343	1	0.401634
ebi-a-GCST90001468	ieu-b-85.vcf	CD62L- myeloid Dendritic Cell Absolute Count	3.176	4	0.528817
ebi-a-GCST90001468	ieu-b-85.vcf	CD62L- myeloid Dendritic Cell Absolute Count	3.17701	5	0.672717
ebi-a-GCST90001481	ieu-b-85.vcf	Resting CD4 regulatory T cell %CD4 regulatory T cell	5.87966	8	0.66071
ebi-a-GCST90001481	ieu-b-85.vcf	Resting CD4 regulatory T cell %CD4 regulatory T cell	6.33086	9	0.706402
ebi-a-GCST90001532	ieu-b-85.vcf	Basophil Absolute Count	1.61194	1	0.20422
ebi-a-GCST90001532	ieu-b-85.vcf	Basophil Absolute Count	1.99587	2	0.368639
ebi-a-GCST90001582	ieu-b-85.vcf	CD14+ CD16- monocyte Absolute Count	1.82974	1	0.176159
ebi-a-GCST90001586	ieu-b-85.vcf	CD14+ CD16- monocyte %monocyte	3.11838	1	0.0774137
ebi-a-GCST90001604	ieu-b-85.vcf	T cell %lymphocyte	0.254107	1	0.614198
ebi-a-GCST90001609	ieu-b-85.vcf	CD4+ CD8dim T cell Absolute Count	1.06803	1	0.30139
ebi-a-GCST90001609	ieu-b-85.vcf	CD4+ CD8dim T cell Absolute Count	4.30771	2	0.116036
ebi-a-GCST90001611	ieu-b-85.vcf	CD4+ CD8dim T cell %leukocyte	0.718397	1	0.39667
ebi-a-GCST90001611	ieu-b-85.vcf	CD4+ CD8dim T cell %leukocyte	4.26918	2	0.118293
ebi-a-GCST90001649	ieu-b-85.vcf	HLA DR+ Natural Killer %Natural Killer	4.81147	5	0.439319
ebi-a-GCST90001649	ieu-b-85.vcf	HLA DR+ Natural Killer %Natural Killer	5.64471	6	0.464142
ebi-a-GCST90001691	ieu-b-85.vcf	CD28+ CD45RA- CD8+ T cell %T cell	0.00172275	1	0.966893
ebi-a-GCST90001691	ieu-b-85.vcf	CD28+ CD45RA- CD8+ T cell %T cell	0.809784	2	0.667049
ebi-a-GCST90001705	ieu-b-85.vcf	BAFF-R on IgD+ CD38- B cell	12.3575	6	0.0544518
ebi-a-GCST90001705	ieu-b-85.vcf	BAFF-R on IgD+ CD38- B cell	12.3581	7	0.0893818
ebi-a-GCST90001706	ieu-b-85.vcf	BAFF-R on IgD+ CD38- naive B cell	8.70218	5	0.121549
ebi-a-GCST90001706	ieu-b-85.vcf	BAFF-R on IgD+ CD38- naive B cell	8.78213	6	0.186207
ebi-a-GCST90001712	ieu-b-85.vcf	BAFF-R on IgD- CD38- B cell	12.901	6	0.0446352
ebi-a-GCST90001712	ieu-b-85.vcf	BAFF-R on IgD- CD38- B cell	13.9364	7	0.0523244
ebi-a-GCST90001829	ieu-b-85.vcf	BAFF-R on B cell	12.8155	7	0.0767339
ebi-a-GCST90001829	ieu-b-85.vcf	BAFF-R on B cell	13.2921	8	0.102185
ebi-a-GCST90001846	ieu-b-85.vcf	CD3 on Central Memory CD8+ T cell	1.27582	1	0.258678
ebi-a-GCST90001848	ieu-b-85.vcf	CD3 on Natural Killer T	3.86556	1	0.0492868
ebi-a-GCST90001924	ieu-b-85.vcf	CD127 on CD28+ CD4+ T cell	0.00311515	1	0.95549
ebi-a-GCST90001924	ieu-b-85.vcf	CD127 on CD28+ CD4+ T cell	9.60448	2	0.00821134
ebi-a-GCST90001985	ieu-b-85.vcf	CD40 on monocytes	3.46584	3	0.32522
ebi-a-GCST90001985	ieu-b-85.vcf	CD40 on monocytes	6.01584	4	0.197969
ebi-a-GCST90002005	ieu-b-85.vcf	CD16 on CD14+ CD16+ monocyte	0.733506	3	0.865296
ebi-a-GCST90002005	ieu-b-85.vcf	CD16 on CD14+ CD16+ monocyte	0.778115	4	0.941358
ebi-a-GCST90002007	ieu-b-85.vcf	HLA DR on CD14+ CD16+ monocyte	0.339451	2	0.843897
ebi-a-GCST90002007	ieu-b-85.vcf	HLA DR on CD14+ CD16+ monocyte	3.20309	3	0.36136
ebi-a-GCST90002016	ieu-b-85.vcf	CCR2 on CD62L+ plasmacytoid Dendritic Cell	2.29738	1	0.129593
ebi-a-GCST90002033	ieu-b-85.vcf	CD39 on granulocyte	2.52442	1	0.112096
ebi-a-GCST90002071	ieu-b-85.vcf	SSC-A on myeloid Dendritic Cell	1.49002	4	0.828408
ebi-a-GCST90002071	ieu-b-85.vcf	SSC-A on myeloid Dendritic Cell	4.96103	5	0.420655
ebi-a-GCST90002120	ieu-b-85.vcf	CD8 on CD28- CD8+ T cell	0.388523	1	0.533077
ebi-a-GCST90001406	ieu-b-85.vcf	Memory B cell %B cell	0.163327	1	0.686112
ebi-a-GCST90001451	ieu-b-85.vcf	CD62L- monocyte %monocyte	0.951141	2	0.62153
ebi-a-GCST90001451	ieu-b-85.vcf	CD62L- monocyte %monocyte	0.955022	3	0.812133
ebi-a-GCST90001463	ieu-b-85.vcf	CD62L- Dendritic Cell %Dendritic Cell	0.470524	1	0.492746
ebi-a-GCST90001463	ieu-b-85.vcf	CD62L- Dendritic Cell %Dendritic Cell	2.33463	2	0.311202
ebi-a-GCST90001484	ieu-b-85.vcf	CD39+ resting CD4 regulatory T cell %resting CD4 regulatory T cell	2.696	5	0.74673
ebi-a-GCST90001484	ieu-b-85.vcf	CD39+ resting CD4 regulatory T cell %resting CD4 regulatory T cell	3.57054	6	0.734562
ebi-a-GCST90001634	ieu-b-85.vcf	CD8dim Natural Killer T %T cell	3.68465	3	0.297591
ebi-a-GCST90001634	ieu-b-85.vcf	CD8dim Natural Killer T %T cell	4.07969	4	0.395329
ebi-a-GCST90001647	ieu-b-85.vcf	Natural Killer %lymphocyte	0.18452	1	0.667517
ebi-a-GCST90001647	ieu-b-85.vcf	Natural Killer %lymphocyte	0.217747	2	0.896844
ebi-a-GCST90001658	ieu-b-85.vcf	CD39+ CD4+ T cell %T cell	1.01123	4	0.908088
ebi-a-GCST90001658	ieu-b-85.vcf	CD39+ CD4+ T cell %T cell	1.4112	5	0.923084
ebi-a-GCST90001665	ieu-b-85.vcf	CD28+ CD45RA+ CD8dim T cell %CD8dim T cell	2.79613	3	0.424138
ebi-a-GCST90001665	ieu-b-85.vcf	CD28+ CD45RA+ CD8dim T cell %CD8dim T cell	3.55347	4	0.469795
ebi-a-GCST90001672	ieu-b-85.vcf	CD39+ CD8+ T cell Absolute Count	14.6698	4	0.00543735
ebi-a-GCST90001672	ieu-b-85.vcf	CD39+ CD8+ T cell Absolute Count	16.5817	5	0.00536544
ebi-a-GCST90001687	ieu-b-85.vcf	CD28- CD8+ T cell Absolute Count	0.543209	1	0.461106
ebi-a-GCST90001692	ieu-b-85.vcf	CD28+ CD45RA- CD8+ T cell %CD8+ T cell	3.16546	2	0.205414
ebi-a-GCST90001692	ieu-b-85.vcf	CD28+ CD45RA- CD8+ T cell %CD8+ T cell	3.62861	3	0.304461
ebi-a-GCST90001696	ieu-b-85.vcf	CD45RA- CD28- CD8+ T cell %CD8+ T cell	3.05777	6	0.801562
ebi-a-GCST90001696	ieu-b-85.vcf	CD45RA- CD28- CD8+ T cell %CD8+ T cell	3.1291	7	0.872808
ebi-a-GCST90001707	ieu-b-85.vcf	BAFF-R on IgD+ CD38- unswitched memory B cell	28.6457	6	7.09844e-05
ebi-a-GCST90001707	ieu-b-85.vcf	BAFF-R on IgD+ CD38- unswitched memory B cell	28.7968	7	0.000157564
ebi-a-GCST90001723	ieu-b-85.vcf	CD19 on CD24+ CD27+ B cell	0.167749	1	0.68212
ebi-a-GCST90001748	ieu-b-85.vcf	CD20 on IgD+ CD38- B cell	2.88441	1	0.0894406
ebi-a-GCST90001748	ieu-b-85.vcf	CD20 on IgD+ CD38- B cell	2.89702	2	0.23492
ebi-a-GCST90001752	ieu-b-85.vcf	CD20 on IgD+ CD38dim B cell	1.79052	3	0.616999
ebi-a-GCST90001752	ieu-b-85.vcf	CD20 on IgD+ CD38dim B cell	2.70117	4	0.60901
ebi-a-GCST90001787	ieu-b-85.vcf	CD25 on IgD- CD38- B cell	3.03898	1	0.081287
ebi-a-GCST90001787	ieu-b-85.vcf	CD25 on IgD- CD38- B cell	3.04855	2	0.217779
ebi-a-GCST90001816	ieu-b-85.vcf	CD38 on naive-mature B cell	0.0122329	1	0.911932
ebi-a-GCST90001816	ieu-b-85.vcf	CD38 on naive-mature B cell	0.376502	2	0.828407
ebi-a-GCST90001843	ieu-b-85.vcf	CD3 on Effector Memory CD4+ T cell	2.17371	1	0.140387
ebi-a-GCST90001853	ieu-b-85.vcf	CD3 on activated CD4 regulatory T cell	1.7123	2	0.424794
ebi-a-GCST90001853	ieu-b-85.vcf	CD3 on activated CD4 regulatory T cell	3.75312	3	0.289386
ebi-a-GCST90001856	ieu-b-85.vcf	CD3 on CD39+ secreting CD4 regulatory T cell	0.210187	1	0.646621
ebi-a-GCST90001856	ieu-b-85.vcf	CD3 on CD39+ secreting CD4 regulatory T cell	1.15266	2	0.561956
ebi-a-GCST90001887	ieu-b-85.vcf	CD28 on secreting CD4 regulatory T cell	3.40946	1	0.0648236
ebi-a-GCST90001887	ieu-b-85.vcf	CD28 on secreting CD4 regulatory T cell	5.59193	2	0.0610559
ebi-a-GCST90001926	ieu-b-85.vcf	CD127 on granulocyte	6.51574	5	0.259216
ebi-a-GCST90001926	ieu-b-85.vcf	CD127 on granulocyte	7.22026	6	0.300957
ebi-a-GCST90001963	ieu-b-85.vcf	FSC-A on myeloid Dendritic Cell	0.0965581	1	0.756
ebi-a-GCST90001963	ieu-b-85.vcf	FSC-A on myeloid Dendritic Cell	3.23964	2	0.197934
ebi-a-GCST90001965	ieu-b-85.vcf	FSC-A on monocyte	1.56465	1	0.210986
ebi-a-GCST90002008	ieu-b-85.vcf	CCR2 on monocyte	0.00300247	1	0.956302
ebi-a-GCST90002023	ieu-b-85.vcf	CD4 on Central Memory CD4+ T cell	4.18227	1	0.0408489
ebi-a-GCST90002027	ieu-b-85.vcf	CD4 on CD45RA+ CD4+ T cell	4.18524	1	0.0407774
ebi-a-GCST90002117	ieu-b-85.vcf	HLA DR on HLA DR+ Natural Killer	16.3169	4	0.00262217
ebi-a-GCST90002117	ieu-b-85.vcf	HLA DR on HLA DR+ Natural Killer	19.3696	5	0.00164
ebi-a-GCST90001399	ieu-b-85.vcf	IgD- CD27- B cell %B cell	1.41609	1	0.234048
ebi-a-GCST90001399	ieu-b-85.vcf	IgD- CD27- B cell %B cell	1.76651	2	0.413434
ebi-a-GCST90001401	ieu-b-85.vcf	IgD- CD27- B cell Absolute Count	0.730692	1	0.392659
ebi-a-GCST90001434	ieu-b-85.vcf	Switched memory B cell %lymphocyte	0.173074	1	0.677394
ebi-a-GCST90001434	ieu-b-85.vcf	Switched memory B cell %lymphocyte	2.33758	2	0.310743
ebi-a-GCST90001439	ieu-b-85.vcf	IgD+ CD24+ B cell %lymphocyte	0.0846189	1	0.771133
ebi-a-GCST90001496	ieu-b-85.vcf	CD39+ secreting CD4 regulatory T cell %secreting CD4 regulatory T cell	2.08055	5	0.837892
ebi-a-GCST90001496	ieu-b-85.vcf	CD39+ secreting CD4 regulatory T cell %secreting CD4 regulatory T cell	2.0919	6	0.911056
ebi-a-GCST90001547	ieu-b-85.vcf	Terminally Differentiated CD4+ T cell %T cell	20.8965	3	0.000110618
ebi-a-GCST90001547	ieu-b-85.vcf	Terminally Differentiated CD4+ T cell %T cell	22.4014	4	0.00016672
ebi-a-GCST90001598	ieu-b-85.vcf	CD4-CD8- T cell Absolute Count	2.2431	1	0.134212
ebi-a-GCST90001659	ieu-b-85.vcf	CD39+ CD4+ T cell %CD4+ T cell	1.02521	4	0.90595
ebi-a-GCST90001659	ieu-b-85.vcf	CD39+ CD4+ T cell %CD4+ T cell	1.41933	5	0.922187
ebi-a-GCST90001681	ieu-b-85.vcf	CD25++ CD8+ T cell Absolute Count	1.54146	1	0.214401
ebi-a-GCST90001681	ieu-b-85.vcf	CD25++ CD8+ T cell Absolute Count	1.54434	2	0.462008
ebi-a-GCST90001724	ieu-b-85.vcf	CD19 on IgD+ CD24+ B cell	0.162965	1	0.686441
ebi-a-GCST90001724	ieu-b-85.vcf	CD19 on IgD+ CD24+ B cell	1.4502	2	0.484277
ebi-a-GCST90001737	ieu-b-85.vcf	CD19 on naive-mature B cell	2.3792	1	0.12296
ebi-a-GCST90001738	ieu-b-85.vcf	CD19 on unswitched memory B cell	0.562065	2	0.755004
ebi-a-GCST90001738	ieu-b-85.vcf	CD19 on unswitched memory B cell	3.69289	3	0.296593
ebi-a-GCST90001745	ieu-b-85.vcf	CD20 on CD24+ CD27+ B cell	25.0954	5	0.000133544
ebi-a-GCST90001745	ieu-b-85.vcf	CD20 on CD24+ CD27+ B cell	30.0134	6	3.90782e-05
ebi-a-GCST90001758	ieu-b-85.vcf	CD20 on memory B cell	9.19456	2	0.0100792
ebi-a-GCST90001758	ieu-b-85.vcf	CD20 on memory B cell	14.8287	3	0.00196908
ebi-a-GCST90001792	ieu-b-85.vcf	CD25 on unswitched memory B cell	3.06994	2	0.215462
ebi-a-GCST90001792	ieu-b-85.vcf	CD25 on unswitched memory B cell	4.80604	3	0.186564
ebi-a-GCST90001801	ieu-b-85.vcf	CD27 on IgD+ CD38- unswitched memory B cell	2.13826	3	0.544212
ebi-a-GCST90001801	ieu-b-85.vcf	CD27 on IgD+ CD38- unswitched memory B cell	2.19713	4	0.699555
ebi-a-GCST90001823	ieu-b-85.vcf	IgD on IgD+ CD38- unswitched memory B cell	18.4224	1	1.76964e-05
ebi-a-GCST90001823	ieu-b-85.vcf	IgD on IgD+ CD38- unswitched memory B cell	19.7283	2	5.20062e-05
ebi-a-GCST90001842	ieu-b-85.vcf	CD3 on Naive CD4+ T cell	2.02698	2	0.36295
ebi-a-GCST90001842	ieu-b-85.vcf	CD3 on Naive CD4+ T cell	4.2662	3	0.234117
ebi-a-GCST90001945	ieu-b-85.vcf	CD123 on CD62L+ plasmacytoid Dendritic Cell	1.42977	1	0.231802
ebi-a-GCST90001954	ieu-b-85.vcf	CD33 on basophil	3.87713	5	0.567238
ebi-a-GCST90001954	ieu-b-85.vcf	CD33 on basophil	3.88233	6	0.692596
ebi-a-GCST90001961	ieu-b-85.vcf	CD25 on CD39+ CD4+ T cell	9.4801	4	0.0501578
ebi-a-GCST90001961	ieu-b-85.vcf	CD25 on CD39+ CD4+ T cell	9.58095	5	0.0880179
ebi-a-GCST90001987	ieu-b-85.vcf	CD64 on CD14+ CD16- monocyte	4.28112	5	0.509691
ebi-a-GCST90001987	ieu-b-85.vcf	CD64 on CD14+ CD16- monocyte	19.2234	6	0.00380245
ebi-a-GCST90002009	ieu-b-85.vcf	HLA DR on CD14- CD16-	1.60214	2	0.448849
ebi-a-GCST90002009	ieu-b-85.vcf	HLA DR on CD14- CD16-	8.92881	3	0.0302525
ebi-a-GCST90002012	ieu-b-85.vcf	CX3CR1 on CD14- CD16+ monocyte	0.00252987	1	0.959885
ebi-a-GCST90002056	ieu-b-85.vcf	CD8 on Effector Memory CD8+ T cell	1.94925	1	0.162667
ebi-a-GCST90002056	ieu-b-85.vcf	CD8 on Effector Memory CD8+ T cell	2.21016	2	0.331184
ebi-a-GCST90002081	ieu-b-85.vcf	SSC-A on CD4+ T cell	15.4845	2	0.000434092
ebi-a-GCST90002081	ieu-b-85.vcf	SSC-A on CD4+ T cell	21.9553	3	6.66442e-05
ebi-a-GCST90002106	ieu-b-85.vcf	HLA DR on Dendritic Cell	1.37127	4	0.849173
ebi-a-GCST90002106	ieu-b-85.vcf	HLA DR on Dendritic Cell	1.3874	5	0.925686
ebi-a-GCST90001398	ieu-b-85.vcf	Unswitched memory B cell Absolute Count	0.461714	1	0.496824
ebi-a-GCST90001489	ieu-b-85.vcf	CD39+ activated CD4 regulatory T cell Absolute Count	0.652209	2	0.72173
ebi-a-GCST90001489	ieu-b-85.vcf	CD39+ activated CD4 regulatory T cell Absolute Count	0.67579	3	0.878883
ebi-a-GCST90001492	ieu-b-85.vcf	Secreting CD4 regulatory T cell Absolute Count	3.27283	2	0.194677
ebi-a-GCST90001492	ieu-b-85.vcf	Secreting CD4 regulatory T cell Absolute Count	6.19287	3	0.102595
ebi-a-GCST90001530	ieu-b-85.vcf	Monocytic Myeloid-Derived Suppressor Cells Absolute Count	14.7853	1	0.000120474
ebi-a-GCST90001531	ieu-b-85.vcf	CD33dim HLA DR- Absolute Count	1.48368	1	0.223199
ebi-a-GCST90001531	ieu-b-85.vcf	CD33dim HLA DR- Absolute Count	1.79635	2	0.407312
ebi-a-GCST90001560	ieu-b-85.vcf	CD45RA+ CD8+ T cell Absolute Count	2.38115	1	0.122807
ebi-a-GCST90001560	ieu-b-85.vcf	CD45RA+ CD8+ T cell Absolute Count	3.38173	2	0.18436
ebi-a-GCST90001610	ieu-b-85.vcf	CD4+ CD8dim T cell %lymphocyte	0.0696087	1	0.791907
ebi-a-GCST90001622	ieu-b-85.vcf	Natural Killer T %T cell	4.93697	5	0.423621
ebi-a-GCST90001622	ieu-b-85.vcf	Natural Killer T %T cell	5.49508	6	0.482052
ebi-a-GCST90001698	ieu-b-85.vcf	CD45RA+ CD28- CD8+ T cell Absolute Count	408.378	415	0.582346
ebi-a-GCST90001698	ieu-b-85.vcf	CD45RA+ CD28- CD8+ T cell Absolute Count	411.245	416	0.556596
ebi-a-GCST90001708	ieu-b-85.vcf	BAFF-R on IgD+ CD38+ B cell	12.8098	7	0.0768792
ebi-a-GCST90001708	ieu-b-85.vcf	BAFF-R on IgD+ CD38+ B cell	13.2915	8	0.102206
ebi-a-GCST90001743	ieu-b-85.vcf	CD20 on B cell	5.94601	2	0.0511495
ebi-a-GCST90001743	ieu-b-85.vcf	CD20 on B cell	6.89342	3	0.0753736
ebi-a-GCST90001803	ieu-b-85.vcf	CD27 on IgD- CD38+ B cell	0.155437	1	0.693393
ebi-a-GCST90001976	ieu-b-85.vcf	FSC-A on Natural Killer T	1.43235	1	0.231382
ebi-a-GCST90001980	ieu-b-85.vcf	CD40 on CD14+ CD16- monocyte	0.185729	2	0.911317
ebi-a-GCST90001980	ieu-b-85.vcf	CD40 on CD14+ CD16- monocyte	1.77604	3	0.620162
ebi-a-GCST90001990	ieu-b-85.vcf	CD64 on CD14- CD16+ monocyte	4.0279	1	0.0447535
ebi-a-GCST90002003	ieu-b-85.vcf	CCR2 on CD14- CD16-	0.000238998	1	0.987666
ebi-a-GCST90002003	ieu-b-85.vcf	CCR2 on CD14- CD16-	0.618284	2	0.734077
ebi-a-GCST90002052	ieu-b-85.vcf	CD45 on Immature Myeloid-Derived Suppressor Cells	0.00118169	1	0.972578
