# Supplementary material for: Causal role of immune cells in prostate cancer: a bidirectional Mendelian-randomization analyses
Source: Aging (Albany NY). 2024 Jun 17;16(12):10477–88. doi: 10.18632/aging.205942 (PMC11236311; doi:10.18632/aging.205942)
Supplement: Supplementary Table 5 [file aging-16-205942-s006.xlsx]

## Sheet: Sheet1
Supplementary Table 5. The results of pleiotropy test for immune cells on PCa.
id.exposure	id.outcome	outcome	exposure	se	pval
ebi-a-GCST90001392	ieu-b-85.vcf	outcome	IgD+ CD38+ B cell Absolute Count
ebi-a-GCST90001534	ieu-b-85.vcf	outcome	CD45RA- CD4+ T cell Absolute Count
ebi-a-GCST90001553	ieu-b-85.vcf	outcome	Naive CD8+ T cell %T cell	0.00827881	0.770735
ebi-a-GCST90001573	ieu-b-85.vcf	outcome	Terminally Differentiated CD4-CD8- T cell %CD4-CD8- T cell
ebi-a-GCST90001618	ieu-b-85.vcf	outcome	HLA DR+ T cell Absolute Count	0.0139157	0.549328
ebi-a-GCST90001663	ieu-b-85.vcf	outcome	CD28- CD8dim T cell Absolute Count
ebi-a-GCST90001669	ieu-b-85.vcf	outcome	CD28+ CD45RA- CD8dim T cell Absolute Count	0.0534384	0.407949
ebi-a-GCST90001693	ieu-b-85.vcf	outcome	CD28+ CD45RA- CD8+ T cell Absolute Count
ebi-a-GCST90001728	ieu-b-85.vcf	outcome	CD19 on IgD+ CD38- unswitched memory B cell	0.379292	0.514569
ebi-a-GCST90001729	ieu-b-85.vcf	outcome	CD19 on IgD+ CD38+ B cell	0.0512399	0.237099
ebi-a-GCST90001778	ieu-b-85.vcf	outcome	CD25 on IgD+ CD24+ B cell	0.0212822	0.533446
ebi-a-GCST90001847	ieu-b-85.vcf	outcome	CD3 on HLA DR+ T cell
ebi-a-GCST90001851	ieu-b-85.vcf	outcome	CD3 on T cell	0.0293958	0.467285
ebi-a-GCST90001857	ieu-b-85.vcf	outcome	CD3 on activated & secreting CD4 regulatory T cell	0.0186975	0.275459
ebi-a-GCST90001868	ieu-b-85.vcf	outcome	CD3 on CD4 regulatory T cell	0.047426	0.813317
ebi-a-GCST90001888	ieu-b-85.vcf	outcome	CD28 on CD39+ secreting CD4 regulatory T cell
ebi-a-GCST90001897	ieu-b-85.vcf	outcome	CD28 on CD39+ CD8+ T cell
ebi-a-GCST90001908	ieu-b-85.vcf	outcome	CCR7 on naive CD8+ T cell
ebi-a-GCST90001946	ieu-b-85.vcf	outcome	CD33 on CD14+ monocyte	0.00879927	0.248333
ebi-a-GCST90001952	ieu-b-85.vcf	outcome	CD33 on Monocytic Myeloid-Derived Suppressor Cells	0.00891927	0.732371
ebi-a-GCST90001957	ieu-b-85.vcf	outcome	CD33 on CD33+ HLA DR+ CD14-	0.00890434	0.765451
ebi-a-GCST90001969	ieu-b-85.vcf	outcome	FSC-A on Natural Killer	0.0134554	0.968343
ebi-a-GCST90002002	ieu-b-85.vcf	outcome	PDL-1 on monocyte
ebi-a-GCST90002006	ieu-b-85.vcf	outcome	CD64 on monocyte	0.0188103	0.0104562
ebi-a-GCST90002010	ieu-b-85.vcf	outcome	HLA DR on monocyte	0.0145065	0.43178
ebi-a-GCST90002060	ieu-b-85.vcf	outcome	CD8 on HLA DR+ CD8+ T cell
ebi-a-GCST90002069	ieu-b-85.vcf	outcome	CD4 on CD39+ secreting CD4 regulatory T cell	0.0792458	0.930794
ebi-a-GCST90002078	ieu-b-85.vcf	outcome	SSC-A on granulocyte	0.10926	0.794311
ebi-a-GCST90001424	ieu-b-85.vcf	outcome	IgD+ B cell %Lymphocyte
ebi-a-GCST90001461	ieu-b-85.vcf	outcome	Dendritic Cell Absolute Count	0.0246731	0.674597
ebi-a-GCST90001464	ieu-b-85.vcf	outcome	CD86+ myeloid Dendritic Cell Absolute Count	0.0217453	0.855675
ebi-a-GCST90001474	ieu-b-85.vcf	outcome	Plasmacytoid Dendritic Cell %Dendritic Cell
ebi-a-GCST90001487	ieu-b-85.vcf	outcome	Activated CD4 regulatory T cell %CD4 regulatory T cell	0.0416836	0.97029
ebi-a-GCST90001507	ieu-b-85.vcf	outcome	CD25++ CD45RA+ CD4 not regulatory T cell Absolute Count	0.0126618	0.790807
ebi-a-GCST90001528	ieu-b-85.vcf	outcome	CD33dim HLA DR+ CD11b- %CD33dim HLA DR+	0.0294913	0.498841
ebi-a-GCST90001533	ieu-b-85.vcf	outcome	Basophil %CD33dim HLA DR- CD66b-	0.0180132	0.933889
ebi-a-GCST90001561	ieu-b-85.vcf	outcome	CD45RA+ CD8+ T cell %CD8+ T cell	0.00743275	0.118192
ebi-a-GCST90001569	ieu-b-85.vcf	outcome	Effector Memory CD4-CD8- T cell Absolute Count	0.0157603	0.357496
ebi-a-GCST90001585	ieu-b-85.vcf	outcome	CD14+ CD16+ monocyte %monocyte	0.0116112	0.40823
ebi-a-GCST90001587	ieu-b-85.vcf	outcome	CD16+ monocyte %monocyte
ebi-a-GCST90001667	ieu-b-85.vcf	outcome	CD28+ CD45RA- CD8dim T cell %T cell	0.0454645	0.316775
ebi-a-GCST90001736	ieu-b-85.vcf	outcome	CD19 on memory B cell
ebi-a-GCST90001785	ieu-b-85.vcf	outcome	CD25 on IgD- CD24- B cell
ebi-a-GCST90001860	ieu-b-85.vcf	outcome	CD3 on CD39+ CD4+ T cell	0.0113671	0.321513
ebi-a-GCST90001884	ieu-b-85.vcf	outcome	CD16-CD56 on Natural Killer	0.0145553	0.990448
ebi-a-GCST90001890	ieu-b-85.vcf	outcome	CD28 on CD45RA+ CD4+ T cell
ebi-a-GCST90001892	ieu-b-85.vcf	outcome	CD28 on CD39+ CD4+ T cell	0.0241242	0.892414
ebi-a-GCST90001894	ieu-b-85.vcf	outcome	CD28 on CD28+ CD4+ T cell
ebi-a-GCST90001932	ieu-b-85.vcf	outcome	CD127 on CD45RA+ CD4+ T cell
ebi-a-GCST90001955	ieu-b-85.vcf	outcome	CD33 on Immature Myeloid-Derived Suppressor Cells	0.0118369	0.991928
ebi-a-GCST90002036	ieu-b-85.vcf	outcome	CD80 on CD62L+ myeloid Dendritic Cell
ebi-a-GCST90002062	ieu-b-85.vcf	outcome	CD4 on CD28+ CD4+ T cell
ebi-a-GCST90002087	ieu-b-85.vcf	outcome	CD11c on myeloid Dendritic Cell	0.0194997	0.901448
ebi-a-GCST90002088	ieu-b-85.vcf	outcome	CD11c on CD62L+ myeloid Dendritic Cell
ebi-a-GCST90002089	ieu-b-85.vcf	outcome	CD11c on monocyte
ebi-a-GCST90002104	ieu-b-85.vcf	outcome	HLA DR on myeloid Dendritic Cell	0.0219056	0.439328
ebi-a-GCST90001480	ieu-b-85.vcf	outcome	Resting CD4 regulatory T cell Absolute Count	0.00840499	0.84236
ebi-a-GCST90001483	ieu-b-85.vcf	outcome	CD39+ resting CD4 regulatory T cell Absolute Count	0.00556126	0.351315
ebi-a-GCST90001495	ieu-b-85.vcf	outcome	CD39+ secreting CD4 regulatory T cell Absolute Count	0.00757591	0.582506
ebi-a-GCST90001527	ieu-b-85.vcf	outcome	CD33dim HLA DR+ CD11b- Absolute Count
ebi-a-GCST90001546	ieu-b-85.vcf	outcome	Terminally Differentiated CD4+ T cell %CD4+ T cell	0.027979	0.675402
ebi-a-GCST90001555	ieu-b-85.vcf	outcome	Effector Memory CD8+ T cell %CD8+ T cell	0.00826673	0.333494
ebi-a-GCST90001571	ieu-b-85.vcf	outcome	Effector Memory CD4-CD8- T cell %T cell	0.0306349	0.724507
ebi-a-GCST90001581	ieu-b-85.vcf	outcome	CD14- CD16- Absolute Count
ebi-a-GCST90001619	ieu-b-85.vcf	outcome	HLA DR+ T cell%T cell	0.0107836	0.429039
ebi-a-GCST90001646	ieu-b-85.vcf	outcome	Natural Killer %CD3- lymphocyte	0.00745052	0.741049
ebi-a-GCST90001650	ieu-b-85.vcf	outcome	HLA DR+ Natural Killer %CD3- lymphocyte	0.00946373	0.646218
ebi-a-GCST90001695	ieu-b-85.vcf	outcome	CD45RA- CD28- CD8+ T cell Absolute Count	0.00473674	0.677571
ebi-a-GCST90001709	ieu-b-85.vcf	outcome	BAFF-R on IgD+ CD38dim B cell	0.0098367	0.676426
ebi-a-GCST90001716	ieu-b-85.vcf	outcome	BAFF-R on naive-mature B cell	0.00991768	0.673975
ebi-a-GCST90001717	ieu-b-85.vcf	outcome	BAFF-R on unswitched memory B cell	0.0167896	0.411619
ebi-a-GCST90001730	ieu-b-85.vcf	outcome	CD19 on IgD+ CD38dim B cell	0.0500171	0.23382
ebi-a-GCST90001746	ieu-b-85.vcf	outcome	CD20 on IgD+ CD24+ B cell
ebi-a-GCST90001768	ieu-b-85.vcf	outcome	CD24 on IgD+ CD38+ B cell
ebi-a-GCST90001795	ieu-b-85.vcf	outcome	CD25 on transitional B cell
ebi-a-GCST90001806	ieu-b-85.vcf	outcome	CD27 on unswitched memory B cell	0.0100394	0.653061
ebi-a-GCST90001821	ieu-b-85.vcf	outcome	IgD on IgD+ CD24- B cell	0.00954179	0.819601
ebi-a-GCST90001833	ieu-b-85.vcf	outcome	CD62L on CD62L+ Dendritic Cell
ebi-a-GCST90001858	ieu-b-85.vcf	outcome	CD3 on CD45RA+ CD4+ T cell	0.0108365	0.229562
ebi-a-GCST90001950	ieu-b-85.vcf	outcome	CD33 on Granulocytic Myeloid-Derived Suppressor Cells	0.0133836	0.794116
ebi-a-GCST90001953	ieu-b-85.vcf	outcome	CD33 on CD33dim HLA DR-	0.00954279	0.713096
ebi-a-GCST90001989	ieu-b-85.vcf	outcome	CD40 on CD14- CD16+ monocyte	0.0181605	0.275327
ebi-a-GCST90002017	ieu-b-85.vcf	outcome	CCR2 on monocyte
ebi-a-GCST90002024	ieu-b-85.vcf	outcome	CD4 on naive CD4+ T cell	0.0200016	0.9301
ebi-a-GCST90002037	ieu-b-85.vcf	outcome	CD80 on plasmacytoid Dendritic Cell
ebi-a-GCST90002038	ieu-b-85.vcf	outcome	CD80 on CD62L+ plasmacytoid Dendritic Cell
ebi-a-GCST90002100	ieu-b-85.vcf	outcome	CD45RA on naive CD8+ T cell
ebi-a-GCST90001458	ieu-b-85.vcf	outcome	Myeloid Dendritic Cell Absolute Count	0.0253298	0.68746
ebi-a-GCST90001491	ieu-b-85.vcf	outcome	CD39+ activated CD4 regulatory T cell %CD4 regulatory T cell	0.00719646	0.575175
ebi-a-GCST90001535	ieu-b-85.vcf	outcome	CD45RA- CD4+ T cell %CD4+ T cell	0.00968404	0.67896
ebi-a-GCST90001596	ieu-b-85.vcf	outcome	CD8dim T cell Absolute Count
ebi-a-GCST90001599	ieu-b-85.vcf	outcome	CD4-CD8- T cell %T cell
ebi-a-GCST90001623	ieu-b-85.vcf	outcome	Natural Killer T %lymphocyte	0.0107015	0.71447
ebi-a-GCST90001633	ieu-b-85.vcf	outcome	CD8dim Natural Killer T Absolute Count	0.0127056	0.456668
ebi-a-GCST90001635	ieu-b-85.vcf	outcome	CD8dim Natural Killer T %lymphocyte	0.0121723	0.474941
ebi-a-GCST90001644	ieu-b-85.vcf	outcome	B cell %lymphocyte
ebi-a-GCST90001664	ieu-b-85.vcf	outcome	CD28+ CD45RA+ CD8dim T cell %T cell	0.00919004	0.689116
ebi-a-GCST90001668	ieu-b-85.vcf	outcome	CD28+ CD45RA- CD8dim T cell %CD8dim T cell
ebi-a-GCST90001671	ieu-b-85.vcf	outcome	CD39+ CD8+ T cell %CD8+ T cell	0.025194	0.272464
ebi-a-GCST90001762	ieu-b-85.vcf	outcome	CD20 on IgD+ B cell
ebi-a-GCST90001763	ieu-b-85.vcf	outcome	CD20 on transitional B cell
ebi-a-GCST90001784	ieu-b-85.vcf	outcome	CD25 on IgD+ CD38dim B cell	0.014548	0.394679
ebi-a-GCST90001826	ieu-b-85.vcf	outcome	IgD on unswitched memory B cell	0.0853848	0.424433
ebi-a-GCST90001861	ieu-b-85.vcf	outcome	CD3 on CD28+ CD4+ T cell
ebi-a-GCST90001864	ieu-b-85.vcf	outcome	CD3 on CD28+ CD45RA+ CD8+ T cell	0.0191515	0.43065
ebi-a-GCST90001865	ieu-b-85.vcf	outcome	CD3 on CD28- CD8+ T cell
ebi-a-GCST90001867	ieu-b-85.vcf	outcome	CD3 on CD4+ T cell
ebi-a-GCST90001891	ieu-b-85.vcf	outcome	CD28 on CD45RA- CD4 not regulatory T cell	0.0144664	0.349875
ebi-a-GCST90001896	ieu-b-85.vcf	outcome	CD28 on CD28+ CD45RA+ CD8+ T cell	0.0361478	0.585966
ebi-a-GCST90001911	ieu-b-85.vcf	outcome	CD45 on Natural Killer
ebi-a-GCST90001917	ieu-b-85.vcf	outcome	CD45 on CD8+ T cell
ebi-a-GCST90001983	ieu-b-85.vcf	outcome	CD14 on CD14+ CD16+ monocyte
ebi-a-GCST90002015	ieu-b-85.vcf	outcome	CCR2 on plasmacytoid Dendritic Cell
ebi-a-GCST90002025	ieu-b-85.vcf	outcome	CD4 on Effector Memory CD4+ T cell
ebi-a-GCST90002029	ieu-b-85.vcf	outcome	CD39 on CD39+ CD8+ T cell
ebi-a-GCST90002054	ieu-b-85.vcf	outcome	CD8 on Central Memory CD8+ T cell	0.0302933	0.231908
ebi-a-GCST90002061	ieu-b-85.vcf	outcome	CD4 on CD39+ CD4+ T cell	0.0226461	0.653285
ebi-a-GCST90002121	ieu-b-85.vcf	outcome	CD8 on CD39+ CD8+ T cell	0.0271491	0.861067
ebi-a-GCST90001462	ieu-b-85.vcf	outcome	CD62L- Dendritic Cell Absolute Count	0.0233488	0.869088
ebi-a-GCST90001482	ieu-b-85.vcf	outcome	Resting CD4 regulatory T cell %CD4+ T cell	0.00993801	0.60865
ebi-a-GCST90001485	ieu-b-85.vcf	outcome	CD39+ resting CD4 regulatory T cell %CD4 regulatory T cell	0.00522586	0.323755
ebi-a-GCST90001503	ieu-b-85.vcf	outcome	Activated & secreting CD4 regulatory T cell %CD4+ T cell	0.0100922	0.216664
ebi-a-GCST90001512	ieu-b-85.vcf	outcome	CD25++ CD45RA- CD4 not regulatory T cell %T cell	0.0312806	0.402199
ebi-a-GCST90001524	ieu-b-85.vcf	outcome	Granulocytic Myeloid-Derived Suppressor Cells Absolute Count
ebi-a-GCST90001543	ieu-b-85.vcf	outcome	Effector Memory CD4+ T cell %CD4+ T cell
ebi-a-GCST90001551	ieu-b-85.vcf	outcome	Naive CD8+ T cell Absolute Count
ebi-a-GCST90001584	ieu-b-85.vcf	outcome	CD14- CD16+ monocyte %monocyte
ebi-a-GCST90001613	ieu-b-85.vcf	outcome	CD4-CD8- T cell %leukocyte	0.0263749	0.606641
ebi-a-GCST90001628	ieu-b-85.vcf	outcome	HLA DR+ CD8+ T cell %T cell	0.0103143	0.628272
ebi-a-GCST90001643	ieu-b-85.vcf	outcome	B cell %CD3- lymphocyte	0.0122591	0.8716
ebi-a-GCST90001661	ieu-b-85.vcf	outcome	CD28- CD8dim T cell %T cell	0.0196138	0.590527
ebi-a-GCST90001690	ieu-b-85.vcf	outcome	CD28+ CD45RA+ CD8+ T cell Absolute Count
ebi-a-GCST90001747	ieu-b-85.vcf	outcome	CD20 on IgD+ CD24- B cell
ebi-a-GCST90001755	ieu-b-85.vcf	outcome	CD20 on IgD- CD38- B cell	0.105542	0.187732
ebi-a-GCST90001759	ieu-b-85.vcf	outcome	CD20 on naive-mature B cell	0.0241424	0.879703
ebi-a-GCST90001783	ieu-b-85.vcf	outcome	CD25 on IgD+ CD38+ B cell	0.02907	0.995257
ebi-a-GCST90001789	ieu-b-85.vcf	outcome	CD25 on IgD- CD38dim B cell	0.0143133	0.70765
ebi-a-GCST90001793	ieu-b-85.vcf	outcome	CD25 on switched memory B cell	0.0215868	0.71113
ebi-a-GCST90001794	ieu-b-85.vcf	outcome	CD25 on IgD+ B cell
ebi-a-GCST90001839	ieu-b-85.vcf	outcome	CD3 on Effector Memory CD8+ T cell	0.0341019	0.781189
ebi-a-GCST90001840	ieu-b-85.vcf	outcome	CD3 on Terminally Differentiated CD8+ T cell
ebi-a-GCST90001981	ieu-b-85.vcf	outcome	CD40 on CD14+ CD16+ monocyte	0.0162334	0.926864
ebi-a-GCST90001991	ieu-b-85.vcf	outcome	HLA DR on CD14+ monocyte	0.150596	0.826933
ebi-a-GCST90001997	ieu-b-85.vcf	outcome	CX3CR1 on CD14+ CD16- monocyte	0.0269325	0.625301
ebi-a-GCST90002055	ieu-b-85.vcf	outcome	CD8 on naive CD8+ T cell	0.0201243	0.197179
ebi-a-GCST90002109	ieu-b-85.vcf	outcome	HLA DR on CD33+ HLA DR+ CD14dim	0.0331769	0.945609
ebi-a-GCST90002116	ieu-b-85.vcf	outcome	HLA DR on B cell	0.0182788	0.913987
ebi-a-GCST90001426	ieu-b-85.vcf	outcome	IgD- CD38dim B cell %lymphocyte
ebi-a-GCST90001450	ieu-b-85.vcf	outcome	CD62L- monocyte Absolute Count
ebi-a-GCST90001497	ieu-b-85.vcf	outcome	CD39+ secreting CD4 regulatory T cell %CD4 regulatory T cell	0.00702373	0.533048
ebi-a-GCST90001510	ieu-b-85.vcf	outcome	CD25++ CD45RA- CD4 not regulatory T cell Absolute Count
ebi-a-GCST90001516	ieu-b-85.vcf	outcome	Immature Myeloid-Derived Suppressor Cells %CD33dim HLA DR- CD66b-
ebi-a-GCST90001559	ieu-b-85.vcf	outcome	Terminally Differentiated CD8+ T cell %T cell
ebi-a-GCST90001574	ieu-b-85.vcf	outcome	Terminally Differentiated CD4-CD8- T cell %T cell	0.0143153	0.554199
ebi-a-GCST90001627	ieu-b-85.vcf	outcome	HLA DR+ CD8+ T cell Absolute Count	0.0122668	0.54704
ebi-a-GCST90001637	ieu-b-85.vcf	outcome	CD4-CD8- Natural Killer T %T cell	0.0196118	0.970038
ebi-a-GCST90001666	ieu-b-85.vcf	outcome	CD28+ CD45RA+ CD8dim T cell Absolute Count	0.00797157	0.486752
ebi-a-GCST90001699	ieu-b-85.vcf	outcome	CD45RA+ CD28- CD8+ T cell %CD8+ T cell
ebi-a-GCST90001700	ieu-b-85.vcf	outcome	CD45RA+ CD28- CD8+ T cell %T cell	0.00891072	0.390983
ebi-a-GCST90001711	ieu-b-85.vcf	outcome	BAFF-R on IgD- CD27- B cell	0.0139612	0.800825
ebi-a-GCST90001713	ieu-b-85.vcf	outcome	BAFF-R on IgD- CD38+ B cell	0.0174297	0.757577
ebi-a-GCST90001777	ieu-b-85.vcf	outcome	CD25 on CD24+ CD27+ B cell	0.0152611	0.418721
ebi-a-GCST90001802	ieu-b-85.vcf	outcome	CD27 on IgD- CD38- B cell	0.00911943	0.628349
ebi-a-GCST90001824	ieu-b-85.vcf	outcome	IgD on IgD+ CD38+ B cell	0.0142253	0.993232
ebi-a-GCST90001855	ieu-b-85.vcf	outcome	CD3 on secreting CD4 regulatory T cell	0.0479729	0.864634
ebi-a-GCST90001885	ieu-b-85.vcf	outcome	CD16-CD56 on HLA DR+ Natural Killer
ebi-a-GCST90001898	ieu-b-85.vcf	outcome	CD28 on CD4+ T cell
ebi-a-GCST90001901	ieu-b-85.vcf	outcome	CD28 on CD39+ resting CD4 regulatory T cell
ebi-a-GCST90001992	ieu-b-85.vcf	outcome	CCR2 on CD14+ CD16+ monocyte
ebi-a-GCST90002004	ieu-b-85.vcf	outcome	CCR2 on CD14+ CD16- monocyte	0.027164	0.917369
ebi-a-GCST90002059	ieu-b-85.vcf	outcome	CD8 on Natural Killer T
ebi-a-GCST90002090	ieu-b-85.vcf	outcome	CD11c on granulocyte	0.0163297	0.29264
ebi-a-GCST90002102	ieu-b-85.vcf	outcome	CD45RA on resting CD4 regulatory T cell	0.0124583	0.554488
ebi-a-GCST90002118	ieu-b-85.vcf	outcome	CD8 on CD28+ CD45RA- CD8+ T cell
ebi-a-GCST90001471	ieu-b-85.vcf	outcome	CD62L- plasmacytoid Dendritic Cell %Dendritic Cell
ebi-a-GCST90001473	ieu-b-85.vcf	outcome	CD62L- CD86+ myeloid Dendritic Cell %Dendritic Cell	0.0127091	0.933369
ebi-a-GCST90001511	ieu-b-85.vcf	outcome	CD25++ CD45RA- CD4 not regulatory T cell %CD4+ T cell	0.0271101	0.390437
ebi-a-GCST90001514	ieu-b-85.vcf	outcome	Hematopoietic Stem Cell Absolute Count
ebi-a-GCST90001541	ieu-b-85.vcf	outcome	Naive CD4+ T cell %CD4+ T cell	0.0168378	0.805232
ebi-a-GCST90001603	ieu-b-85.vcf	outcome	T cell Absolute Count
ebi-a-GCST90001624	ieu-b-85.vcf	outcome	HLA DR+ CD4+ T cell Absolute Count
ebi-a-GCST90001702	ieu-b-85.vcf	outcome	BAFF-R on CD24+ CD27+ B cell	0.0177367	0.546752
ebi-a-GCST90001718	ieu-b-85.vcf	outcome	BAFF-R on switched memory B cell	0.0123178	0.966775
ebi-a-GCST90001719	ieu-b-85.vcf	outcome	BAFF-R on IgD+ B cell	0.009796	0.673167
ebi-a-GCST90001735	ieu-b-85.vcf	outcome	CD19 on IgD- CD38dim B cell
ebi-a-GCST90001740	ieu-b-85.vcf	outcome	CD19 on switched memory B cell
ebi-a-GCST90001775	ieu-b-85.vcf	outcome	CD25 on B cell	0.0210318	0.839277
ebi-a-GCST90001779	ieu-b-85.vcf	outcome	CD25 on IgD+ CD24- B cell	0.0113376	0.599133
ebi-a-GCST90001827	ieu-b-85.vcf	outcome	IgD on IgD+ B cell
ebi-a-GCST90001832	ieu-b-85.vcf	outcome	CD62L on CD62L+ plasmacytoid Dendritic Cell	0.0184074	0.486218
ebi-a-GCST90001947	ieu-b-85.vcf	outcome	CD33 on CD33+ HLA DR+ CD14dim	0.00879599	0.78146
ebi-a-GCST90001964	ieu-b-85.vcf	outcome	FSC-A on plasmacytoid Dendritic Cell	0.0177633	0.600756
ebi-a-GCST90001970	ieu-b-85.vcf	outcome	FSC-A on HLA DR+ Natural Killer	0.0122579	0.333814
ebi-a-GCST90001994	ieu-b-85.vcf	outcome	CX3CR1 on CD14- CD16-	0.0151612	0.439759
ebi-a-GCST90001995	ieu-b-85.vcf	outcome	CX3CR1 on monocyte	0.0230282	0.587219
ebi-a-GCST90001999	ieu-b-85.vcf	outcome	PDL-1 on CD14- CD16+ monocyte
ebi-a-GCST90002011	ieu-b-85.vcf	outcome	CD64 on CD14+ CD16+ monocyte
ebi-a-GCST90002045	ieu-b-85.vcf	outcome	CD45 on CD33- HLA DR-
ebi-a-GCST90002046	ieu-b-85.vcf	outcome	CD45 on CD33- HLA DR+
ebi-a-GCST90002072	ieu-b-85.vcf	outcome	SSC-A on plasmacytoid Dendritic Cell	0.0239069	0.605194
ebi-a-GCST90002077	ieu-b-85.vcf	outcome	SSC-A on HLA DR+ Natural Killer	0.0133883	0.467474
ebi-a-GCST90001486	ieu-b-85.vcf	outcome	Activated CD4 regulatory T cell Absolute Count
ebi-a-GCST90001493	ieu-b-85.vcf	outcome	Secreting CD4 regulatory T cell %CD4 regulatory T cell	0.0088399	0.831455
ebi-a-GCST90001499	ieu-b-85.vcf	outcome	Activated & resting CD4 regulatory T cell %CD4 regulatory T cell	0.00880589	0.824673
ebi-a-GCST90001502	ieu-b-85.vcf	outcome	Activated & secreting CD4 regulatory T cell %CD4 regulatory T cell	0.00858629	0.721788
ebi-a-GCST90001562	ieu-b-85.vcf	outcome	CD45RA+ CD8+ T cell %T cell
ebi-a-GCST90001620	ieu-b-85.vcf	outcome	HLA DR+ T cell%lymphocyte	0.0122738	0.61663
ebi-a-GCST90001629	ieu-b-85.vcf	outcome	HLA DR+ CD8+ T cell %lymphocyte	0.0171253	0.779212
ebi-a-GCST90001638	ieu-b-85.vcf	outcome	CD4-CD8- Natural Killer T %lymphocyte	0.0115828	0.785612
ebi-a-GCST90001654	ieu-b-85.vcf	outcome	CD28- CD4-CD8- T cell Absolute Count
ebi-a-GCST90001760	ieu-b-85.vcf	outcome	CD20 on unswitched memory B cell	0.170084	0.299697
ebi-a-GCST90001786	ieu-b-85.vcf	outcome	CD25 on IgD- CD27- B cell
ebi-a-GCST90001790	ieu-b-85.vcf	outcome	CD25 on memory B cell	0.0146658	0.375154
ebi-a-GCST90001808	ieu-b-85.vcf	outcome	CD27 on switched memory B cell	0.00991078	0.841075
ebi-a-GCST90001811	ieu-b-85.vcf	outcome	CD38 on IgD+ CD24- B cell
ebi-a-GCST90001812	ieu-b-85.vcf	outcome	CD38 on IgD+ CD38+ B cell	0.0388632	0.959361
ebi-a-GCST90001815	ieu-b-85.vcf	outcome	CD38 on IgD- CD38dim B cell	0.054797	0.651716
ebi-a-GCST90001819	ieu-b-85.vcf	outcome	CD38 on transitional B cell	0.0127415	0.360189
ebi-a-GCST90001820	ieu-b-85.vcf	outcome	IgD on IgD+ CD24+ B cell	0.0223901	0.399497
ebi-a-GCST90001838	ieu-b-85.vcf	outcome	CD3 on naive CD8+ T cell	0.0177845	0.917181
ebi-a-GCST90001845	ieu-b-85.vcf	outcome	CD3 on CD45RA- CD4+ T cell	0.0381074	0.520402
ebi-a-GCST90001886	ieu-b-85.vcf	outcome	CD28 on CD39+ activated CD4 regulatory T cell
ebi-a-GCST90001910	ieu-b-85.vcf	outcome	CD45 on B cell
ebi-a-GCST90001948	ieu-b-85.vcf	outcome	CD33 on CD33dim HLA DR+ CD11b+	0.00694702	0.123494
ebi-a-GCST90001951	ieu-b-85.vcf	outcome	CD33 on CD66b++ myeloid cell	0.00963373	0.371812
ebi-a-GCST90002014	ieu-b-85.vcf	outcome	CCR2 on CD62L+ myeloid Dendritic Cell	0.032321	0.571678
ebi-a-GCST90002032	ieu-b-85.vcf	outcome	CD39 on CD39+ CD4+ T cell	0.00658765	0.414655
ebi-a-GCST90002034	ieu-b-85.vcf	outcome	CD39 on monocyte
ebi-a-GCST90002039	ieu-b-85.vcf	outcome	CD80 on monocyte	0.0111418	0.530118
ebi-a-GCST90002066	ieu-b-85.vcf	outcome	CD4 on activated CD4 regulatory T cell
ebi-a-GCST90002074	ieu-b-85.vcf	outcome	SSC-A on CD14+ monocyte	0.014087	0.110001
ebi-a-GCST90002111	ieu-b-85.vcf	outcome	HLA DR on CD33dim HLA DR+ CD11b-	0.110392	0.607733
ebi-a-GCST90001432	ieu-b-85.vcf	outcome	Unswitched memory B cell %lymphocyte	0.026763	0.595249
ebi-a-GCST90001459	ieu-b-85.vcf	outcome	Myeloid Dendritic Cell %Dendritic Cell
ebi-a-GCST90001460	ieu-b-85.vcf	outcome	Plasmacytoid Dendritic Cell Absolute Count
ebi-a-GCST90001494	ieu-b-85.vcf	outcome	Secreting CD4 regulatory T cell %CD4+ T cell	0.0128681	0.553901
ebi-a-GCST90001509	ieu-b-85.vcf	outcome	CD25++ CD45RA+ CD4 not regulatory T cell %T cell	0.00845572	0.293717
ebi-a-GCST90001558	ieu-b-85.vcf	outcome	Terminally Differentiated CD8+ T cell %CD8+ T cell	0.021885	0.890886
ebi-a-GCST90001621	ieu-b-85.vcf	outcome	Natural Killer T Absolute Count	0.0115338	0.470053
ebi-a-GCST90001645	ieu-b-85.vcf	outcome	Natural Killer Absolute Count	0.0484772	0.930943
ebi-a-GCST90001660	ieu-b-85.vcf	outcome	CD39+ CD4+ T cell Absolute Count	0.0137027	0.517888
ebi-a-GCST90001697	ieu-b-85.vcf	outcome	CD45RA- CD28- CD8+ T cell %T cell	0.0119673	0.326037
ebi-a-GCST90001703	ieu-b-85.vcf	outcome	BAFF-R on IgD+ CD24+ B cell	0.0133751	0.313117
ebi-a-GCST90001715	ieu-b-85.vcf	outcome	BAFF-R on memory B cell	0.0168683	0.413754
ebi-a-GCST90001725	ieu-b-85.vcf	outcome	CD19 on IgD+ CD24- B cell	0.0360617	0.514071
ebi-a-GCST90001742	ieu-b-85.vcf	outcome	CD19 on transitional B cell	0.0492493	0.22568
ebi-a-GCST90001761	ieu-b-85.vcf	outcome	CD20 on switched memory B cell	0.0249839	0.218533
ebi-a-GCST90001780	ieu-b-85.vcf	outcome	CD25 on IgD+ CD38- B cell
ebi-a-GCST90001800	ieu-b-85.vcf	outcome	CD27 on IgD+ CD24+ B cell	0.0159804	0.461879
ebi-a-GCST90001805	ieu-b-85.vcf	outcome	CD27 on memory B cell	0.0187196	0.605612
ebi-a-GCST90001828	ieu-b-85.vcf	outcome	IgD on transitional B cell	0.0172161	0.371783
ebi-a-GCST90001854	ieu-b-85.vcf	outcome	CD3 on CD39+ activated CD4 regulatory T cell	0.012058	0.202134
ebi-a-GCST90001870	ieu-b-85.vcf	outcome	CD34 on Hematopoietic Stem Cell	0.0830006	0.586561
ebi-a-GCST90001949	ieu-b-85.vcf	outcome	CD33 on CD33dim HLA DR+ CD11b-	0.00631037	0.0859203
ebi-a-GCST90001988	ieu-b-85.vcf	outcome	HLA DR on CD14+ CD16- monocyte	0.144998	0.838269
ebi-a-GCST90001996	ieu-b-85.vcf	outcome	CX3CR1 on CD14+ CD16+ monocyte	0.0136143	0.509424
ebi-a-GCST90002031	ieu-b-85.vcf	outcome	CD39 on CD39+ secreting CD4 regulatory T cell	0.00656801	0.44926
ebi-a-GCST90002035	ieu-b-85.vcf	outcome	CD80 on myeloid Dendritic Cell	0.018873	0.343312
ebi-a-GCST90002040	ieu-b-85.vcf	outcome	CD80 on granulocyte	0.0234588	0.592256
ebi-a-GCST90002067	ieu-b-85.vcf	outcome	CD4 on CD39+ activated CD4 regulatory T cell	0.134549	0.171902
ebi-a-GCST90002099	ieu-b-85.vcf	outcome	CD4RA on Terminally Differentiated CD4+ T cell	0.0154242	0.54675
ebi-a-GCST90002105	ieu-b-85.vcf	outcome	HLA DR on plasmacytoid Dendritic Cell	0.0141951	0.690541
ebi-a-GCST90001472	ieu-b-85.vcf	outcome	CD62L- CD86+ myeloid Dendritic Cell Absolute Count	0.0125849	0.970289
ebi-a-GCST90001475	ieu-b-85.vcf	outcome	HLA DR++ monocyte %monocyte	0.0259208	0.430743
ebi-a-GCST90001501	ieu-b-85.vcf	outcome	Activated & secreting CD4 regulatory T cell Absolute Count	0.0235835	0.329106
ebi-a-GCST90001508	ieu-b-85.vcf	outcome	CD25++ CD45RA+ CD4 not regulatory T cell %CD4+ T cell	0.00855046	0.289401
ebi-a-GCST90001520	ieu-b-85.vcf	outcome	CD33+ HLA DR+ CD14dim Absolute Count
ebi-a-GCST90001526	ieu-b-85.vcf	outcome	CD33dim HLA DR+ CD11b+ %CD33dim HLA DR+	0.0307382	0.504615
ebi-a-GCST90001536	ieu-b-85.vcf	outcome	CD45RA- CD4+ T cell %T cell
ebi-a-GCST90001588	ieu-b-85.vcf	outcome	T/B cell
ebi-a-GCST90001630	ieu-b-85.vcf	outcome	CD8+ Natural Killer T Absolute Count
ebi-a-GCST90001648	ieu-b-85.vcf	outcome	HLA DR+ Natural Killer Absolute Count	0.0250596	0.74844
ebi-a-GCST90001670	ieu-b-85.vcf	outcome	CD39+ CD8+ T cell %T cell	0.0211623	0.598349
ebi-a-GCST90001688	ieu-b-85.vcf	outcome	CD28+ CD45RA+ CD8+ T cell %T cell	0.0134509	0.337775
ebi-a-GCST90001710	ieu-b-85.vcf	outcome	BAFF-R on IgD- CD24- B cell	0.0139468	0.784254
ebi-a-GCST90001720	ieu-b-85.vcf	outcome	BAFF-R on transitional B cell	0.0125916	0.800618
ebi-a-GCST90001751	ieu-b-85.vcf	outcome	CD20 on IgD+ CD38+ B cell	0.0161925	0.389057
ebi-a-GCST90001754	ieu-b-85.vcf	outcome	CD20 on IgD- CD27- B cell	0.0922067	0.477109
ebi-a-GCST90001757	ieu-b-85.vcf	outcome	CD20 on IgD- CD38dim B cell	0.024233	0.38758
ebi-a-GCST90001781	ieu-b-85.vcf	outcome	CD25 on IgD+ CD38- naive B cell	0.0219148	0.959938
ebi-a-GCST90001798	ieu-b-85.vcf	outcome	CD27 on CD24+ CD27+ B cell	0.00842513	0.573532
ebi-a-GCST90001804	ieu-b-85.vcf	outcome	CD27 on IgD- CD38dim B cell	0.00765108	0.584735
ebi-a-GCST90001825	ieu-b-85.vcf	outcome	IgD on IgD+ CD38dim B cell	0.00979037	0.757783
ebi-a-GCST90001849	ieu-b-85.vcf	outcome	CD3 on HLA DR+ CD4+ T cell
ebi-a-GCST90001863	ieu-b-85.vcf	outcome	CD3 on CD28+ CD45RA- CD8+ T cell	0.0483454	0.459247
ebi-a-GCST90001883	ieu-b-85.vcf	outcome	CD16-CD56 on Natural Killer T	0.0180051	0.434328
ebi-a-GCST90001907	ieu-b-85.vcf	outcome	CCR7 on naive CD4+ T cell	0.0268507	0.393411
ebi-a-GCST90001920	ieu-b-85.vcf	outcome	CD45 on HLA DR+ CD4+ T cell
ebi-a-GCST90001933	ieu-b-85.vcf	outcome	CD25 on CD45RA- CD4 not regulatory T cell
ebi-a-GCST90001956	ieu-b-85.vcf	outcome	CD33 on CD33+ HLA DR+	0.0088774	0.772045
ebi-a-GCST90001979	ieu-b-85.vcf	outcome	CD16 on CD14- CD16+ monocyte	0.00713947	0.8025
ebi-a-GCST90001984	ieu-b-85.vcf	outcome	HLA DR on CD14- CD16+ monocyte	0.0210598	0.523016
ebi-a-GCST90002073	ieu-b-85.vcf	outcome	SSC-A on monocyte	0.00888203	0.165488
ebi-a-GCST90002084	ieu-b-85.vcf	outcome	SSC-A on Natural Killer T
ebi-a-GCST90002098	ieu-b-85.vcf	outcome	CD45RA on naive CD4+ T cell	0.00903862	0.0721107
ebi-a-GCST90002108	ieu-b-85.vcf	outcome	HLA DR on CD33+ HLA DR+ CD14-	0.0273053	0.904505
ebi-a-GCST90002119	ieu-b-85.vcf	outcome	CD8 on CD28+ CD45RA+ CD8+ T cell	0.0278789	0.610286
ebi-a-GCST90001395	ieu-b-85.vcf	outcome	IgD+ CD38- B cell %B cell
ebi-a-GCST90001417	ieu-b-85.vcf	outcome	CD24+ CD27+ B cell %B cell	0.161858	0.944231
ebi-a-GCST90001442	ieu-b-85.vcf	outcome	CD24+ CD27+ B cell %lymphocyte	0.0211515	0.867321
ebi-a-GCST90001465	ieu-b-85.vcf	outcome	CD86+ myeloid Dendritic Cell %Dendritic Cell	0.0208319	0.800844
ebi-a-GCST90001469	ieu-b-85.vcf	outcome	CD62L- myeloid Dendritic Cell %Dendritic Cell	0.0122806	0.9205
ebi-a-GCST90001478	ieu-b-85.vcf	outcome	CD4 regulatory T cell %CD4+ T cell
ebi-a-GCST90001500	ieu-b-85.vcf	outcome	Activated & resting CD4 regulatory T cell %CD4+ T cell	0.00910621	0.718278
ebi-a-GCST90001505	ieu-b-85.vcf	outcome	CD25++ CD4+ T cell %CD4+ T cell
ebi-a-GCST90001515	ieu-b-85.vcf	outcome	Immature Myeloid-Derived Suppressor Cells Absolute Count
ebi-a-GCST90001544	ieu-b-85.vcf	outcome	Effector Memory CD4+ T cell %T cell	0.0178028	0.83543
ebi-a-GCST90001570	ieu-b-85.vcf	outcome	Effector Memory CD4-CD8- T cell %CD4-CD8- T cell	0.0287731	0.520062
ebi-a-GCST90001580	ieu-b-85.vcf	outcome	CD14+ CD16+ monocyte Absolute Count	0.0121124	0.396674
ebi-a-GCST90001594	ieu-b-85.vcf	outcome	CD4+CD8+ T cell Absolute Count
ebi-a-GCST90001601	ieu-b-85.vcf	outcome	Lymphocyte Absolute Count
ebi-a-GCST90001614	ieu-b-85.vcf	outcome	CD8+ and CD8dim T cell %leukocyte
ebi-a-GCST90001626	ieu-b-85.vcf	outcome	HLA DR+ CD4+ T cell %lymphocyte
ebi-a-GCST90001679	ieu-b-85.vcf	outcome	CD25++ CD8+ T cell %T cell
ebi-a-GCST90001694	ieu-b-85.vcf	outcome	CD28- CD4-CD8- T cell %T cell
ebi-a-GCST90001704	ieu-b-85.vcf	outcome	BAFF-R on IgD+ CD24- B cell	0.00948692	0.639423
ebi-a-GCST90001741	ieu-b-85.vcf	outcome	CD19 on IgD+ B cell
ebi-a-GCST90001791	ieu-b-85.vcf	outcome	CD25 on naive-mature B cell	0.017351	0.917403
ebi-a-GCST90001813	ieu-b-85.vcf	outcome	CD38 on IgD+ CD38dim B cell	0.0441182	0.845695
ebi-a-GCST90001841	ieu-b-85.vcf	outcome	CD3 on Central Memory CD4+ T cell	0.0199621	0.325298
ebi-a-GCST90001869	ieu-b-85.vcf	outcome	CD3 on resting CD4 regulatory T cell	0.0112348	0.18355
ebi-a-GCST90001944	ieu-b-85.vcf	outcome	CD123 on plasmacytoid Dendritic Cell
ebi-a-GCST90001973	ieu-b-85.vcf	outcome	FSC-A on CD4+ T cell
ebi-a-GCST90002013	ieu-b-85.vcf	outcome	CCR2 on myeloid Dendritic Cell	0.0370576	0.786502
ebi-a-GCST90002030	ieu-b-85.vcf	outcome	CD39 on CD39+ activated CD4 regulatory T cell	0.00647414	0.459227
ebi-a-GCST90002110	ieu-b-85.vcf	outcome	HLA DR on CD33dim HLA DR+ CD11b+	0.0630606	0.998939
ebi-a-GCST90001431	ieu-b-85.vcf	outcome	IgD+ CD38- B cell %lymphocyte
ebi-a-GCST90001433	ieu-b-85.vcf	outcome	IgD- CD27- B cell %lymphocyte
ebi-a-GCST90001436	ieu-b-85.vcf	outcome	Memory B cell %lymphocyte
ebi-a-GCST90001468	ieu-b-85.vcf	outcome	CD62L- myeloid Dendritic Cell Absolute Count	0.0221573	0.976089
ebi-a-GCST90001481	ieu-b-85.vcf	outcome	Resting CD4 regulatory T cell %CD4 regulatory T cell	0.00836409	0.520686
ebi-a-GCST90001532	ieu-b-85.vcf	outcome	Basophil Absolute Count	0.0152075	0.710953
ebi-a-GCST90001582	ieu-b-85.vcf	outcome	CD14+ CD16- monocyte Absolute Count
ebi-a-GCST90001586	ieu-b-85.vcf	outcome	CD14+ CD16- monocyte %monocyte
ebi-a-GCST90001604	ieu-b-85.vcf	outcome	T cell %lymphocyte
ebi-a-GCST90001609	ieu-b-85.vcf	outcome	CD4+ CD8dim T cell Absolute Count	0.028701	0.331813
ebi-a-GCST90001611	ieu-b-85.vcf	outcome	CD4+ CD8dim T cell %leukocyte	0.0310331	0.310603
ebi-a-GCST90001649	ieu-b-85.vcf	outcome	HLA DR+ Natural Killer %Natural Killer	0.00669026	0.403205
ebi-a-GCST90001691	ieu-b-85.vcf	outcome	CD28+ CD45RA- CD8+ T cell %T cell	0.0456133	0.533855
ebi-a-GCST90001705	ieu-b-85.vcf	outcome	BAFF-R on IgD+ CD38- B cell	0.0136132	0.98769
ebi-a-GCST90001706	ieu-b-85.vcf	outcome	BAFF-R on IgD+ CD38- naive B cell	0.0129781	0.838752
ebi-a-GCST90001712	ieu-b-85.vcf	outcome	BAFF-R on IgD- CD38- B cell	0.0156072	0.513683
ebi-a-GCST90001829	ieu-b-85.vcf	outcome	BAFF-R on B cell	0.00942336	0.625563
ebi-a-GCST90001846	ieu-b-85.vcf	outcome	CD3 on Central Memory CD8+ T cell
ebi-a-GCST90001848	ieu-b-85.vcf	outcome	CD3 on Natural Killer T
ebi-a-GCST90001924	ieu-b-85.vcf	outcome	CD127 on CD28+ CD4+ T cell	0.0281318	0.198736
ebi-a-GCST90001985	ieu-b-85.vcf	outcome	CD40 on monocytes	0.0102386	0.234048
ebi-a-GCST90002005	ieu-b-85.vcf	outcome	CD16 on CD14+ CD16+ monocyte	0.0210556	0.846257
ebi-a-GCST90002007	ieu-b-85.vcf	outcome	HLA DR on CD14+ CD16+ monocyte	0.0248204	0.232677
ebi-a-GCST90002016	ieu-b-85.vcf	outcome	CCR2 on CD62L+ plasmacytoid Dendritic Cell
ebi-a-GCST90002033	ieu-b-85.vcf	outcome	CD39 on granulocyte
ebi-a-GCST90002071	ieu-b-85.vcf	outcome	SSC-A on myeloid Dendritic Cell	0.0320428	0.135917
ebi-a-GCST90002120	ieu-b-85.vcf	outcome	CD8 on CD28- CD8+ T cell
ebi-a-GCST90001406	ieu-b-85.vcf	outcome	Memory B cell %B cell
ebi-a-GCST90001451	ieu-b-85.vcf	outcome	CD62L- monocyte %monocyte	0.0269494	0.955989
ebi-a-GCST90001463	ieu-b-85.vcf	outcome	CD62L- Dendritic Cell %Dendritic Cell	0.0188135	0.402445
ebi-a-GCST90001484	ieu-b-85.vcf	outcome	CD39+ resting CD4 regulatory T cell %resting CD4 regulatory T cell	0.00891808	0.392632
ebi-a-GCST90001634	ieu-b-85.vcf	outcome	CD8dim Natural Killer T %T cell	0.0425679	0.610289
ebi-a-GCST90001647	ieu-b-85.vcf	outcome	Natural Killer %lymphocyte	0.0614176	0.885216
ebi-a-GCST90001658	ieu-b-85.vcf	outcome	CD39+ CD4+ T cell %T cell	0.00702199	0.561451
ebi-a-GCST90001665	ieu-b-85.vcf	outcome	CD28+ CD45RA+ CD8dim T cell %CD8dim T cell	0.00800203	0.4482
ebi-a-GCST90001672	ieu-b-85.vcf	outcome	CD39+ CD8+ T cell Absolute Count	0.0202745	0.51024
ebi-a-GCST90001687	ieu-b-85.vcf	outcome	CD28- CD8+ T cell Absolute Count
ebi-a-GCST90001692	ieu-b-85.vcf	outcome	CD28+ CD45RA- CD8+ T cell %CD8+ T cell	0.00938922	0.642735
ebi-a-GCST90001696	ieu-b-85.vcf	outcome	CD45RA- CD28- CD8+ T cell %CD8+ T cell	0.0059652	0.798353
ebi-a-GCST90001707	ieu-b-85.vcf	outcome	BAFF-R on IgD+ CD38- unswitched memory B cell	0.026172	0.864642
ebi-a-GCST90001723	ieu-b-85.vcf	outcome	CD19 on CD24+ CD27+ B cell
ebi-a-GCST90001748	ieu-b-85.vcf	outcome	CD20 on IgD+ CD38- B cell	0.062742	0.957973
ebi-a-GCST90001752	ieu-b-85.vcf	outcome	CD20 on IgD+ CD38dim B cell	0.0246068	0.410344
ebi-a-GCST90001787	ieu-b-85.vcf	outcome	CD25 on IgD- CD38- B cell	0.0394029	0.964312
ebi-a-GCST90001816	ieu-b-85.vcf	outcome	CD38 on naive-mature B cell	0.054256	0.654301
ebi-a-GCST90001843	ieu-b-85.vcf	outcome	CD3 on Effector Memory CD4+ T cell
ebi-a-GCST90001853	ieu-b-85.vcf	outcome	CD3 on activated CD4 regulatory T cell	0.0190806	0.289331
ebi-a-GCST90001856	ieu-b-85.vcf	outcome	CD3 on CD39+ secreting CD4 regulatory T cell	0.028229	0.509428
ebi-a-GCST90001887	ieu-b-85.vcf	outcome	CD28 on secreting CD4 regulatory T cell	0.0251805	0.570417
ebi-a-GCST90001926	ieu-b-85.vcf	outcome	CD127 on granulocyte	0.0141846	0.495192
ebi-a-GCST90001963	ieu-b-85.vcf	outcome	FSC-A on myeloid Dendritic Cell	0.0781081	0.326949
ebi-a-GCST90001965	ieu-b-85.vcf	outcome	FSC-A on monocyte
ebi-a-GCST90002008	ieu-b-85.vcf	outcome	CCR2 on monocyte
ebi-a-GCST90002023	ieu-b-85.vcf	outcome	CD4 on Central Memory CD4+ T cell
ebi-a-GCST90002027	ieu-b-85.vcf	outcome	CD4 on CD45RA+ CD4+ T cell
ebi-a-GCST90002117	ieu-b-85.vcf	outcome	HLA DR on HLA DR+ Natural Killer	0.0281251	0.435791
ebi-a-GCST90001399	ieu-b-85.vcf	outcome	IgD- CD27- B cell %B cell	0.0180109	0.706132
ebi-a-GCST90001401	ieu-b-85.vcf	outcome	IgD- CD27- B cell Absolute Count
ebi-a-GCST90001434	ieu-b-85.vcf	outcome	Switched memory B cell %lymphocyte	0.153154	0.380046
ebi-a-GCST90001439	ieu-b-85.vcf	outcome	IgD+ CD24+ B cell %lymphocyte
ebi-a-GCST90001496	ieu-b-85.vcf	outcome	CD39+ secreting CD4 regulatory T cell %secreting CD4 regulatory T cell	0.0133564	0.919295
ebi-a-GCST90001547	ieu-b-85.vcf	outcome	Terminally Differentiated CD4+ T cell %T cell	0.0304005	0.673725
ebi-a-GCST90001598	ieu-b-85.vcf	outcome	CD4-CD8- T cell Absolute Count
ebi-a-GCST90001659	ieu-b-85.vcf	outcome	CD39+ CD4+ T cell %CD4+ T cell	0.0070726	0.5642
ebi-a-GCST90001681	ieu-b-85.vcf	outcome	CD25++ CD8+ T cell Absolute Count	0.0160337	0.972468
ebi-a-GCST90001724	ieu-b-85.vcf	outcome	CD19 on IgD+ CD24+ B cell	0.0559184	0.459921
ebi-a-GCST90001737	ieu-b-85.vcf	outcome	CD19 on naive-mature B cell
ebi-a-GCST90001738	ieu-b-85.vcf	outcome	CD19 on unswitched memory B cell	0.0478288	0.218848
ebi-a-GCST90001745	ieu-b-85.vcf	outcome	CD20 on CD24+ CD27+ B cell	0.0647296	0.367688
ebi-a-GCST90001758	ieu-b-85.vcf	outcome	CD20 on memory B cell	0.205025	0.383602
ebi-a-GCST90001792	ieu-b-85.vcf	outcome	CD25 on unswitched memory B cell	0.0148941	0.398974
ebi-a-GCST90001801	ieu-b-85.vcf	outcome	CD27 on IgD+ CD38- unswitched memory B cell	0.0197956	0.823931
ebi-a-GCST90001823	ieu-b-85.vcf	outcome	IgD on IgD+ CD38- unswitched memory B cell	0.063083	0.834347
ebi-a-GCST90001842	ieu-b-85.vcf	outcome	CD3 on Naive CD4+ T cell	0.0176106	0.275518
ebi-a-GCST90001945	ieu-b-85.vcf	outcome	CD123 on CD62L+ plasmacytoid Dendritic Cell
ebi-a-GCST90001954	ieu-b-85.vcf	outcome	CD33 on basophil	0.011478	0.945322
ebi-a-GCST90001961	ieu-b-85.vcf	outcome	CD25 on CD39+ CD4+ T cell	0.0329718	0.846646
ebi-a-GCST90001987	ieu-b-85.vcf	outcome	CD64 on CD14+ CD16- monocyte	0.0199302	0.0118136
ebi-a-GCST90002009	ieu-b-85.vcf	outcome	HLA DR on CD14- CD16-	0.0261476	0.113681
ebi-a-GCST90002012	ieu-b-85.vcf	outcome	CX3CR1 on CD14- CD16+ monocyte
ebi-a-GCST90002056	ieu-b-85.vcf	outcome	CD8 on Effector Memory CD8+ T cell	0.0410114	0.776719
ebi-a-GCST90002081	ieu-b-85.vcf	outcome	SSC-A on CD4+ T cell	0.308	0.457115
ebi-a-GCST90002106	ieu-b-85.vcf	outcome	HLA DR on Dendritic Cell	0.029513	0.905043
ebi-a-GCST90001398	ieu-b-85.vcf	outcome	Unswitched memory B cell Absolute Count
ebi-a-GCST90001489	ieu-b-85.vcf	outcome	CD39+ activated CD4 regulatory T cell Absolute Count	0.0187812	0.89205
ebi-a-GCST90001492	ieu-b-85.vcf	outcome	Secreting CD4 regulatory T cell Absolute Count	0.0234284	0.31333
ebi-a-GCST90001530	ieu-b-85.vcf	outcome	Monocytic Myeloid-Derived Suppressor Cells Absolute Count
ebi-a-GCST90001531	ieu-b-85.vcf	outcome	CD33dim HLA DR- Absolute Count	0.0145047	0.726022
ebi-a-GCST90001560	ieu-b-85.vcf	outcome	CD45RA+ CD8+ T cell Absolute Count	0.122721	0.633859
ebi-a-GCST90001610	ieu-b-85.vcf	outcome	CD4+ CD8dim T cell %lymphocyte
ebi-a-GCST90001622	ieu-b-85.vcf	outcome	Natural Killer T %T cell	0.0118429	0.488643
ebi-a-GCST90001698	ieu-b-85.vcf	outcome	CD45RA+ CD28- CD8+ T cell Absolute Count	0.00249418	0.0911874
ebi-a-GCST90001708	ieu-b-85.vcf	outcome	BAFF-R on IgD+ CD38+ B cell	0.00943561	0.62372
ebi-a-GCST90001743	ieu-b-85.vcf	outcome	CD20 on B cell	0.123215	0.629275
ebi-a-GCST90001803	ieu-b-85.vcf	outcome	CD27 on IgD- CD38+ B cell
ebi-a-GCST90001976	ieu-b-85.vcf	outcome	FSC-A on Natural Killer T
ebi-a-GCST90001980	ieu-b-85.vcf	outcome	CD40 on CD14+ CD16- monocyte	0.0140448	0.334459
ebi-a-GCST90001990	ieu-b-85.vcf	outcome	CD64 on CD14- CD16+ monocyte
ebi-a-GCST90002003	ieu-b-85.vcf	outcome	CCR2 on CD14- CD16-	0.0276385	0.575856
ebi-a-GCST90002052	ieu-b-85.vcf	outcome	CD45 on Immature Myeloid-Derived Suppressor Cells
