# Supplementary material for: Causal role of immune cells in prostate cancer: a bidirectional Mendelian-randomization analyses
Source: Aging (Albany NY). 2024 Jun 17;16(12):10477–88. doi: 10.18632/aging.205942 (PMC11236311; doi:10.18632/aging.205942)
Supplement: Supplementary Table 6 [file aging-16-205942-s007.xlsx]

## Sheet: Sheet1
Supplementary Table 6. Results of the causal effect of PCa on immune cells.
id.exposure	id.outcome	outcome		nsnp	b	se	pval	lo_ci	up_ci	or	or_lci95	or_uci95
ieu-b-85.vcf	ebi-a-GCST90001852	CD3 on CD39+ resting CD4 regulatory T cell	id:ebi-a-GCST90001852	80	-0.00114569	0.0380276	0.975965	-0.0756797	0.0733884	0.998855	0.927113	1.07615
ieu-b-85.vcf	ebi-a-GCST90001852	CD3 on CD39+ resting CD4 regulatory T cell	id:ebi-a-GCST90001852	80	0.00883115	0.0754143	0.90708	-0.138981	0.156643	1.00887	0.870245	1.16958
ieu-b-85.vcf	ebi-a-GCST90001852	CD3 on CD39+ resting CD4 regulatory T cell	id:ebi-a-GCST90001852	80	0.00838591	0.0579914	0.885022	-0.105277	0.122049	1.00842	0.900075	1.12981
ieu-b-85.vcf	ebi-a-GCST90001852	CD3 on CD39+ resting CD4 regulatory T cell	id:ebi-a-GCST90001852	80	0.000736465	0.0833013	0.992968	-0.162534	0.164007	1.00074	0.849987	1.17822
ieu-b-85.vcf	ebi-a-GCST90001946	CD33 on CD14+ monocyte	id:ebi-a-GCST90001946	79	-0.0474728	0.0492587	0.335174	-0.14402	0.0490743	0.953636	0.865871	1.0503
ieu-b-85.vcf	ebi-a-GCST90001946	CD33 on CD14+ monocyte	id:ebi-a-GCST90001946	79	-0.131977	0.0989412	0.186172	-0.325901	0.061948	0.876361	0.721876	1.06391
ieu-b-85.vcf	ebi-a-GCST90001946	CD33 on CD14+ monocyte	id:ebi-a-GCST90001946	79	-0.0251764	0.0726537	0.728947	-0.167578	0.117225	0.975138	0.845711	1.12437
ieu-b-85.vcf	ebi-a-GCST90001946	CD33 on CD14+ monocyte	id:ebi-a-GCST90001946	79	-0.104869	0.115477	0.366604	-0.331204	0.121466	0.900443	0.718059	1.12915
ieu-b-85.vcf	ebi-a-GCST90001957	CD33 on CD33+ HLA DR+ CD14-	id:ebi-a-GCST90001957	74	-0.0154558	0.0507934	0.760909	-0.115011	0.0840992	0.984663	0.891356	1.08774
ieu-b-85.vcf	ebi-a-GCST90001957	CD33 on CD33+ HLA DR+ CD14-	id:ebi-a-GCST90001957	74	-0.153808	0.103477	0.14154	-0.356622	0.0490071	0.857437	0.700037	1.05023
ieu-b-85.vcf	ebi-a-GCST90001957	CD33 on CD33+ HLA DR+ CD14-	id:ebi-a-GCST90001957	74	0.00136812	0.0758156	0.985603	-0.147231	0.149967	1.00137	0.863095	1.1618
ieu-b-85.vcf	ebi-a-GCST90001957	CD33 on CD33+ HLA DR+ CD14-	id:ebi-a-GCST90001957	74	-0.0134276	0.104182	0.897802	-0.217624	0.190769	0.986662	0.804428	1.21018
ieu-b-85.vcf	ebi-a-GCST90001897	CD28 on CD39+ CD8+ T cell	id:ebi-a-GCST90001897	85	-0.0329266	0.0356471	0.355651	-0.102795	0.0369416	0.96761	0.902312	1.03763
ieu-b-85.vcf	ebi-a-GCST90001897	CD28 on CD39+ CD8+ T cell	id:ebi-a-GCST90001897	85	0.0262388	0.0721442	0.717007	-0.115164	0.167641	1.02659	0.89122	1.18251
ieu-b-85.vcf	ebi-a-GCST90001897	CD28 on CD39+ CD8+ T cell	id:ebi-a-GCST90001897	85	-0.0267965	0.0565675	0.635707	-0.137669	0.0840757	0.973559	0.871387	1.08771
ieu-b-85.vcf	ebi-a-GCST90001897	CD28 on CD39+ CD8+ T cell	id:ebi-a-GCST90001897	85	0.0771543	0.143645	0.592605	-0.204389	0.358698	1.08021	0.815145	1.43146
ieu-b-85.vcf	ebi-a-GCST90001538	Central Memory CD4+ T cell %CD4+ T cell	id:ebi-a-GCST90001538	93	-0.00595473	0.0335424	0.859093	-0.0716977	0.0597883	0.994063	0.930812	1.06161
ieu-b-85.vcf	ebi-a-GCST90001538	Central Memory CD4+ T cell %CD4+ T cell	id:ebi-a-GCST90001538	93	-0.012038	0.0672858	0.858407	-0.143918	0.119842	0.988034	0.865959	1.12732
ieu-b-85.vcf	ebi-a-GCST90001538	Central Memory CD4+ T cell %CD4+ T cell	id:ebi-a-GCST90001538	93	0.0248097	0.0535757	0.643308	-0.0801986	0.129818	1.02512	0.922933	1.13862
ieu-b-85.vcf	ebi-a-GCST90001538	Central Memory CD4+ T cell %CD4+ T cell	id:ebi-a-GCST90001538	93	0.0600705	0.0851766	0.482439	-0.106876	0.227017	1.06191	0.898637	1.25485
ieu-b-85.vcf	ebi-a-GCST90001721	CD19 on CD20- B cell	id:ebi-a-GCST90001721	91	0.0130397	0.0316948	0.680769	-0.0490821	0.0751614	1.01313	0.952103	1.07806
ieu-b-85.vcf	ebi-a-GCST90001721	CD19 on CD20- B cell	id:ebi-a-GCST90001721	91	-0.00727459	0.0650452	0.911203	-0.134763	0.120214	0.992752	0.873923	1.12774
ieu-b-85.vcf	ebi-a-GCST90001721	CD19 on CD20- B cell	id:ebi-a-GCST90001721	91	-0.0111845	0.0451256	0.804249	-0.0996307	0.0772617	0.988878	0.905172	1.08032
ieu-b-85.vcf	ebi-a-GCST90001721	CD19 on CD20- B cell	id:ebi-a-GCST90001721	91	-0.0279453	0.0609245	0.647564	-0.147357	0.0914666	0.972442	0.862986	1.09578
ieu-b-85.vcf	ebi-a-GCST90001686	CD28- CD8+ T cell %CD8+ T cell	id:ebi-a-GCST90001686	95	-0.018404	0.0295575	0.533513	-0.0763367	0.0395286	0.981764	0.926504	1.04032
ieu-b-85.vcf	ebi-a-GCST90001686	CD28- CD8+ T cell %CD8+ T cell	id:ebi-a-GCST90001686	95	-0.0909181	0.0585949	0.124145	-0.205764	0.0239279	0.913092	0.814025	1.02422
ieu-b-85.vcf	ebi-a-GCST90001686	CD28- CD8+ T cell %CD8+ T cell	id:ebi-a-GCST90001686	95	-0.0836596	0.0447426	0.0615119	-0.171355	0.00403587	0.919744	0.842522	1.00404
ieu-b-85.vcf	ebi-a-GCST90001686	CD28- CD8+ T cell %CD8+ T cell	id:ebi-a-GCST90001686	95	-0.142085	0.0695818	0.0439542	-0.278466	-0.00570498	0.867547	0.756944	0.994311
ieu-b-85.vcf	ebi-a-GCST90001682	CD127- CD8+ T cell %T cell	id:ebi-a-GCST90001682	93	-0.0091239	0.0324774	0.778763	-0.0727796	0.0545318	0.990918	0.929806	1.05605
ieu-b-85.vcf	ebi-a-GCST90001682	CD127- CD8+ T cell %T cell	id:ebi-a-GCST90001682	93	-0.0547294	0.0653909	0.404809	-0.182896	0.0734368	0.946741	0.832855	1.0762
ieu-b-85.vcf	ebi-a-GCST90001682	CD127- CD8+ T cell %T cell	id:ebi-a-GCST90001682	93	-0.052212	0.0492151	0.288739	-0.148674	0.0442497	0.949128	0.86185	1.04524
ieu-b-85.vcf	ebi-a-GCST90001682	CD127- CD8+ T cell %T cell	id:ebi-a-GCST90001682	93	-0.0744978	0.0659996	0.261933	-0.203857	0.0548614	0.928209	0.815579	1.05639
ieu-b-85.vcf	ebi-a-GCST90001445	IgD- CD38- B cell %B cell	id:ebi-a-GCST90001445	101	0.0375775	0.0319682	0.23981	-0.0250803	0.100235	1.03829	0.975232	1.10543
ieu-b-85.vcf	ebi-a-GCST90001445	IgD- CD38- B cell %B cell	id:ebi-a-GCST90001445	101	0.0630894	0.0645078	0.330453	-0.063346	0.189525	1.06512	0.938619	1.20867
ieu-b-85.vcf	ebi-a-GCST90001445	IgD- CD38- B cell %B cell	id:ebi-a-GCST90001445	101	0.0587163	0.049141	0.232144	-0.0376	0.155033	1.06047	0.963098	1.1677
ieu-b-85.vcf	ebi-a-GCST90001445	IgD- CD38- B cell %B cell	id:ebi-a-GCST90001445	101	0.120357	0.0745239	0.109458	-0.0257094	0.266424	1.1279	0.974618	1.30529
ieu-b-85.vcf	ebi-a-GCST90002041	CD45 on lymphocyte	id:ebi-a-GCST90002041	76	-0.0152399	0.0482213	0.751972	-0.109754	0.0792739	0.984876	0.896055	1.0825
ieu-b-85.vcf	ebi-a-GCST90002041	CD45 on lymphocyte	id:ebi-a-GCST90002041	76	-0.0214823	0.0979342	0.826978	-0.213433	0.170469	0.978747	0.807806	1.18586
ieu-b-85.vcf	ebi-a-GCST90002041	CD45 on lymphocyte	id:ebi-a-GCST90002041	76	0.0170991	0.0720641	0.812443	-0.124147	0.158345	1.01725	0.88325	1.17157
ieu-b-85.vcf	ebi-a-GCST90002041	CD45 on lymphocyte	id:ebi-a-GCST90002041	76	0.0221647	0.101044	0.826967	-0.175881	0.22021	1.02241	0.838718	1.24634
ieu-b-85.vcf	ebi-a-GCST90002093	CD11b on CD66b++ myeloid cell	id:ebi-a-GCST90002093	69	0.0171114	0.0516564	0.740452	-0.084135	0.118358	1.01726	0.919307	1.12565
ieu-b-85.vcf	ebi-a-GCST90002093	CD11b on CD66b++ myeloid cell	id:ebi-a-GCST90002093	69	0.0192517	0.102181	0.851127	-0.181023	0.219526	1.01944	0.834416	1.24549
ieu-b-85.vcf	ebi-a-GCST90002093	CD11b on CD66b++ myeloid cell	id:ebi-a-GCST90002093	69	-0.0323532	0.0726998	0.656302	-0.174845	0.110138	0.968165	0.839587	1.11643
ieu-b-85.vcf	ebi-a-GCST90002093	CD11b on CD66b++ myeloid cell	id:ebi-a-GCST90002093	69	-0.0552332	0.0893201	0.538395	-0.230301	0.119834	0.946264	0.794295	1.12731
ieu-b-85.vcf	ebi-a-GCST90001923	CD127 on CD45RA- CD4 not regulatory T cell	id:ebi-a-GCST90001923	86	0.00938778	0.0360171	0.794364	-0.0612058	0.0799814	1.00943	0.94063	1.08327
ieu-b-85.vcf	ebi-a-GCST90001923	CD127 on CD45RA- CD4 not regulatory T cell	id:ebi-a-GCST90001923	86	0.0290502	0.0723696	0.689135	-0.112794	0.170895	1.02948	0.893334	1.18637
ieu-b-85.vcf	ebi-a-GCST90001923	CD127 on CD45RA- CD4 not regulatory T cell	id:ebi-a-GCST90001923	86	0.0196219	0.0555702	0.724013	-0.0892958	0.12854	1.01982	0.914575	1.13717
ieu-b-85.vcf	ebi-a-GCST90001923	CD127 on CD45RA- CD4 not regulatory T cell	id:ebi-a-GCST90001923	86	0.0256908	0.0739862	0.729271	-0.119322	0.170704	1.02602	0.887522	1.18614
ieu-b-85.vcf	ebi-a-GCST90001968	FSC-A on B cell	id:ebi-a-GCST90001968	91	0.0406466	0.0352629	0.249045	-0.0284688	0.109762	1.04148	0.971933	1.11601
ieu-b-85.vcf	ebi-a-GCST90001968	FSC-A on B cell	id:ebi-a-GCST90001968	91	0.140863	0.0701402	0.047643	0.00338778	0.278338	1.15127	1.00339	1.32093
ieu-b-85.vcf	ebi-a-GCST90001968	FSC-A on B cell	id:ebi-a-GCST90001968	91	0.0376326	0.0540976	0.486653	-0.0683987	0.143664	1.03835	0.933888	1.1545
ieu-b-85.vcf	ebi-a-GCST90001968	FSC-A on B cell	id:ebi-a-GCST90001968	91	-0.0431951	0.105784	0.683998	-0.250531	0.164141	0.957725	0.778387	1.17838
ieu-b-85.vcf	ebi-a-GCST90001888	CD28 on CD39+ secreting CD4 regulatory T cell	id:ebi-a-GCST90001888	90	0.0089282	0.034892	0.798043	-0.0594601	0.0773165	1.00897	0.942273	1.08038
ieu-b-85.vcf	ebi-a-GCST90001888	CD28 on CD39+ secreting CD4 regulatory T cell	id:ebi-a-GCST90001888	90	0.0534738	0.0718086	0.458455	-0.0872711	0.194219	1.05493	0.916429	1.21436
ieu-b-85.vcf	ebi-a-GCST90001888	CD28 on CD39+ secreting CD4 regulatory T cell	id:ebi-a-GCST90001888	90	0.0577715	0.052975	0.275474	-0.0460594	0.161602	1.05947	0.954985	1.17539
ieu-b-85.vcf	ebi-a-GCST90001888	CD28 on CD39+ secreting CD4 regulatory T cell	id:ebi-a-GCST90001888	90	0.0972448	0.0878662	0.27139	-0.0749731	0.269463	1.10213	0.927768	1.30926
ieu-b-85.vcf	ebi-a-GCST90001553	Naive CD8+ T cell %T cell	id:ebi-a-GCST90001553	93	0.0173994	0.0224377	0.438072	-0.0265786	0.0613773	1.01755	0.973772	1.0633
ieu-b-85.vcf	ebi-a-GCST90001553	Naive CD8+ T cell %T cell	id:ebi-a-GCST90001553	93	0.0847799	0.044574	0.0603337	-0.00258511	0.172145	1.08848	0.997418	1.18785
ieu-b-85.vcf	ebi-a-GCST90001553	Naive CD8+ T cell %T cell	id:ebi-a-GCST90001553	93	0.0246105	0.033838	0.46704	-0.041712	0.0909331	1.02492	0.959146	1.0952
ieu-b-85.vcf	ebi-a-GCST90001553	Naive CD8+ T cell %T cell	id:ebi-a-GCST90001553	93	0.023338	0.0506394	0.645982	-0.0759153	0.122591	1.02361	0.926895	1.13042
ieu-b-85.vcf	ebi-a-GCST90001847	CD3 on HLA DR+ T cell	id:ebi-a-GCST90001847	91	0.0164477	0.0348415	0.636875	-0.0518417	0.0847371	1.01658	0.949479	1.08843
ieu-b-85.vcf	ebi-a-GCST90001847	CD3 on HLA DR+ T cell	id:ebi-a-GCST90001847	91	0.0272121	0.0708897	0.701994	-0.111732	0.166156	1.02759	0.894284	1.18076
ieu-b-85.vcf	ebi-a-GCST90001847	CD3 on HLA DR+ T cell	id:ebi-a-GCST90001847	91	-0.0095124	0.0493037	0.84701	-0.106148	0.0871229	0.990533	0.899292	1.09103
ieu-b-85.vcf	ebi-a-GCST90001847	CD3 on HLA DR+ T cell	id:ebi-a-GCST90001847	91	-0.0092886	0.0707647	0.895862	-0.147987	0.12941	0.990754	0.862442	1.13816
ieu-b-85.vcf	ebi-a-GCST90002097	CD11b on CD33+ HLA DR+ CD14dim	id:ebi-a-GCST90002097	68	0.0146118	0.0510055	0.774514	-0.085359	0.114583	1.01472	0.918183	1.12141
ieu-b-85.vcf	ebi-a-GCST90002097	CD11b on CD33+ HLA DR+ CD14dim	id:ebi-a-GCST90002097	68	-0.0264492	0.109903	0.810565	-0.241859	0.188961	0.973897	0.785167	1.20799
ieu-b-85.vcf	ebi-a-GCST90002097	CD11b on CD33+ HLA DR+ CD14dim	id:ebi-a-GCST90002097	68	-0.0133529	0.0765773	0.861573	-0.163444	0.136739	0.986736	0.849214	1.14653
ieu-b-85.vcf	ebi-a-GCST90002097	CD11b on CD33+ HLA DR+ CD14dim	id:ebi-a-GCST90002097	68	-0.0484445	0.106184	0.649699	-0.256565	0.159676	0.95271	0.773705	1.17313
ieu-b-85.vcf	ebi-a-GCST90002060	CD8 on HLA DR+ CD8+ T cell	id:ebi-a-GCST90002060	88	0.0110684	0.0347808	0.750308	-0.057102	0.0792388	1.01113	0.944498	1.08246
ieu-b-85.vcf	ebi-a-GCST90002060	CD8 on HLA DR+ CD8+ T cell	id:ebi-a-GCST90002060	88	-0.009488	0.0708534	0.893786	-0.148361	0.129385	0.990557	0.86212	1.13813
ieu-b-85.vcf	ebi-a-GCST90002060	CD8 on HLA DR+ CD8+ T cell	id:ebi-a-GCST90002060	88	0.0148068	0.0536534	0.78257	-0.0903538	0.119967	1.01492	0.913608	1.12746
ieu-b-85.vcf	ebi-a-GCST90002060	CD8 on HLA DR+ CD8+ T cell	id:ebi-a-GCST90002060	88	-0.000559988	0.0761233	0.994147	-0.149762	0.148642	0.99944	0.860913	1.16026
ieu-b-85.vcf	ebi-a-GCST90001851	CD3 on T cell	id:ebi-a-GCST90001851	89	-0.0111562	0.0356232	0.754151	-0.0809777	0.0586653	0.988906	0.922214	1.06042
ieu-b-85.vcf	ebi-a-GCST90001851	CD3 on T cell	id:ebi-a-GCST90001851	89	-0.00325832	0.0700731	0.963019	-0.140602	0.134085	0.996747	0.868835	1.14349
ieu-b-85.vcf	ebi-a-GCST90001851	CD3 on T cell	id:ebi-a-GCST90001851	89	-0.0230846	0.0529093	0.662615	-0.126787	0.0806177	0.97718	0.880921	1.08396
ieu-b-85.vcf	ebi-a-GCST90001851	CD3 on T cell	id:ebi-a-GCST90001851	89	-0.0631288	0.0827666	0.447663	-0.225351	0.0990937	0.938823	0.798236	1.10417
ieu-b-85.vcf	ebi-a-GCST90001651	Granulocyte Absolute Count	id:ebi-a-GCST90001651	93	0.00412482	0.0324443	0.898833	-0.0594659	0.0677156	1.00413	0.942268	1.07006
ieu-b-85.vcf	ebi-a-GCST90001651	Granulocyte Absolute Count	id:ebi-a-GCST90001651	93	-0.0466837	0.0647778	0.472957	-0.173648	0.0802808	0.954389	0.840593	1.08359
ieu-b-85.vcf	ebi-a-GCST90001651	Granulocyte Absolute Count	id:ebi-a-GCST90001651	93	0.0102669	0.0491417	0.834508	-0.0860508	0.106585	1.01032	0.917548	1.11247
ieu-b-85.vcf	ebi-a-GCST90001651	Granulocyte Absolute Count	id:ebi-a-GCST90001651	93	0.0226145	0.0651007	0.729101	-0.104983	0.150212	1.02287	0.90034	1.16208
ieu-b-85.vcf	ebi-a-GCST90001900	CD28 on resting CD4 regulatory T cell	id:ebi-a-GCST90001900	25	0.0625501	0.0740546	0.398307	-0.0825968	0.207697	1.06455	0.920722	1.23084
ieu-b-85.vcf	ebi-a-GCST90001900	CD28 on resting CD4 regulatory T cell	id:ebi-a-GCST90001900	25	0.0144476	0.166895	0.931765	-0.312667	0.341562	1.01455	0.731493	1.40714
ieu-b-85.vcf	ebi-a-GCST90001900	CD28 on resting CD4 regulatory T cell	id:ebi-a-GCST90001900	25	0.153629	0.097936	0.116725	-0.0383254	0.345584	1.16606	0.9624	1.41281
ieu-b-85.vcf	ebi-a-GCST90001900	CD28 on resting CD4 regulatory T cell	id:ebi-a-GCST90001900	25	0.188673	0.13532	0.176011	-0.0765548	0.453901	1.20765	0.926302	1.57444
ieu-b-85.vcf	ebi-a-GCST90001729	CD19 on IgD+ CD38+ B cell	id:ebi-a-GCST90001729	90	0.00791209	0.0325651	0.808035	-0.0559156	0.0717398	1.00794	0.945619	1.07438
ieu-b-85.vcf	ebi-a-GCST90001729	CD19 on IgD+ CD38+ B cell	id:ebi-a-GCST90001729	90	0.0446313	0.065911	0.50009	-0.0845543	0.173817	1.04564	0.918922	1.18984
ieu-b-85.vcf	ebi-a-GCST90001729	CD19 on IgD+ CD38+ B cell	id:ebi-a-GCST90001729	90	0.0505559	0.0477678	0.289888	-0.043069	0.144181	1.05186	0.957845	1.15509
ieu-b-85.vcf	ebi-a-GCST90001729	CD19 on IgD+ CD38+ B cell	id:ebi-a-GCST90001729	90	0.0716719	0.0613521	0.245843	-0.0485781	0.191922	1.0743	0.952583	1.21158
ieu-b-85.vcf	ebi-a-GCST90001534	CD45RA- CD4+ T cell Absolute Count	id:ebi-a-GCST90001534	104	-0.000576608	0.0330332	0.986073	-0.0653216	0.0641684	0.999424	0.936766	1.06627
ieu-b-85.vcf	ebi-a-GCST90001534	CD45RA- CD4+ T cell Absolute Count	id:ebi-a-GCST90001534	104	-0.0156698	0.0668833	0.815233	-0.146761	0.115421	0.984452	0.8635	1.12235
ieu-b-85.vcf	ebi-a-GCST90001534	CD45RA- CD4+ T cell Absolute Count	id:ebi-a-GCST90001534	104	0.028342	0.0489139	0.562301	-0.0675292	0.124213	1.02875	0.9347	1.13226
ieu-b-85.vcf	ebi-a-GCST90001534	CD45RA- CD4+ T cell Absolute Count	id:ebi-a-GCST90001534	104	0.059792	0.0783469	0.447107	-0.093768	0.213352	1.06162	0.910494	1.23782
ieu-b-85.vcf	ebi-a-GCST90001942	CD25 on CD39+ secreting CD4 regulatory T cell	id:ebi-a-GCST90001942	89	0.0163987	0.0333666	0.623094	-0.0489998	0.0817972	1.01653	0.952181	1.08524
ieu-b-85.vcf	ebi-a-GCST90001942	CD25 on CD39+ secreting CD4 regulatory T cell	id:ebi-a-GCST90001942	89	0.0416616	0.0676748	0.539756	-0.090981	0.174304	1.04254	0.913035	1.19042
ieu-b-85.vcf	ebi-a-GCST90001942	CD25 on CD39+ secreting CD4 regulatory T cell	id:ebi-a-GCST90001942	89	0.0141835	0.0461754	0.758717	-0.0763202	0.104687	1.01428	0.926519	1.11036
ieu-b-85.vcf	ebi-a-GCST90001942	CD25 on CD39+ secreting CD4 regulatory T cell	id:ebi-a-GCST90001942	89	0.040738	0.064412	0.528726	-0.0855095	0.166985	1.04158	0.918044	1.18174
ieu-b-85.vcf	ebi-a-GCST90002010	HLA DR on monocyte	id:ebi-a-GCST90002010	90	0.0232929	0.0329523	0.479649	-0.0412936	0.0878795	1.02357	0.959547	1.09186
ieu-b-85.vcf	ebi-a-GCST90002010	HLA DR on monocyte	id:ebi-a-GCST90002010	90	0.0479969	0.0658471	0.467989	-0.0810634	0.177057	1.04917	0.922135	1.1937
ieu-b-85.vcf	ebi-a-GCST90002010	HLA DR on monocyte	id:ebi-a-GCST90002010	90	0.0154407	0.0488299	0.75184	-0.080266	0.111147	1.01556	0.922871	1.11756
ieu-b-85.vcf	ebi-a-GCST90002010	HLA DR on monocyte	id:ebi-a-GCST90002010	90	0.0247459	0.06321	0.696373	-0.0991458	0.148638	1.02505	0.905611	1.16025
ieu-b-85.vcf	ebi-a-GCST90001693	CD28+ CD45RA- CD8+ T cell Absolute Count	id:ebi-a-GCST90001693	98	-0.0291682	0.0330355	0.377272	-0.0939178	0.0355814	0.971253	0.910358	1.03622
ieu-b-85.vcf	ebi-a-GCST90001693	CD28+ CD45RA- CD8+ T cell Absolute Count	id:ebi-a-GCST90001693	98	0.0425151	0.0662168	0.522365	-0.0872698	0.1723	1.04343	0.91643	1.18803
ieu-b-85.vcf	ebi-a-GCST90001693	CD28+ CD45RA- CD8+ T cell Absolute Count	id:ebi-a-GCST90001693	98	0.00205047	0.049122	0.966704	-0.0942287	0.0983296	1.00205	0.910075	1.10333
ieu-b-85.vcf	ebi-a-GCST90001693	CD28+ CD45RA- CD8+ T cell Absolute Count	id:ebi-a-GCST90001693	98	0.0807545	0.0692409	0.246359	-0.0549576	0.216467	1.0841	0.946525	1.24168
ieu-b-85.vcf	ebi-a-GCST90002078	SSC-A on granulocyte	id:ebi-a-GCST90002078	93	0.0250095	0.0358201	0.485055	-0.0451979	0.0952168	1.02532	0.955808	1.0999
ieu-b-85.vcf	ebi-a-GCST90002078	SSC-A on granulocyte	id:ebi-a-GCST90002078	93	-0.0549001	0.0723994	0.450234	-0.196803	0.0870026	0.94658	0.821353	1.0909
ieu-b-85.vcf	ebi-a-GCST90002078	SSC-A on granulocyte	id:ebi-a-GCST90002078	93	0.0412372	0.0536872	0.442427	-0.0639898	0.146464	1.0421	0.938015	1.15773
ieu-b-85.vcf	ebi-a-GCST90002078	SSC-A on granulocyte	id:ebi-a-GCST90002078	93	0.0673004	0.0808229	0.407176	-0.0911125	0.225713	1.06962	0.912915	1.25322
ieu-b-85.vcf	ebi-a-GCST90001868	CD3 on CD4 regulatory T cell	id:ebi-a-GCST90001868	24	-0.0266532	0.0730997	0.715399	-0.169929	0.116622	0.973699	0.843725	1.12369
ieu-b-85.vcf	ebi-a-GCST90001868	CD3 on CD4 regulatory T cell	id:ebi-a-GCST90001868	24	-0.111628	0.1617	0.497202	-0.428561	0.205305	0.894377	0.651446	1.2279
ieu-b-85.vcf	ebi-a-GCST90001868	CD3 on CD4 regulatory T cell	id:ebi-a-GCST90001868	24	-0.0166871	0.10447	0.873092	-0.221447	0.188073	0.983451	0.801358	1.20692
ieu-b-85.vcf	ebi-a-GCST90001868	CD3 on CD4 regulatory T cell	id:ebi-a-GCST90001868	24	0.012891	0.130895	0.922402	-0.243663	0.269445	1.01297	0.783752	1.30924
ieu-b-85.vcf	ebi-a-GCST90001422	CD20- CD38- B cell %B cell	id:ebi-a-GCST90001422	97	-0.00708071	0.0312944	0.820998	-0.0684176	0.0542562	0.992944	0.93387	1.05576
ieu-b-85.vcf	ebi-a-GCST90001422	CD20- CD38- B cell %B cell	id:ebi-a-GCST90001422	97	-0.0397895	0.0638363	0.534578	-0.164909	0.0853297	0.960992	0.847971	1.08908
ieu-b-85.vcf	ebi-a-GCST90001422	CD20- CD38- B cell %B cell	id:ebi-a-GCST90001422	97	0.00196271	0.0470813	0.966748	-0.0903166	0.0942421	1.00196	0.913642	1.09883
ieu-b-85.vcf	ebi-a-GCST90001422	CD20- CD38- B cell %B cell	id:ebi-a-GCST90001422	97	0.0376218	0.063921	0.557534	-0.0876634	0.162907	1.03834	0.916069	1.17693
ieu-b-85.vcf	ebi-a-GCST90002006	CD64 on monocyte	id:ebi-a-GCST90002006	105	0.0306576	0.031795	0.334931	-0.0316605	0.0929757	1.03113	0.968835	1.09744
ieu-b-85.vcf	ebi-a-GCST90002006	CD64 on monocyte	id:ebi-a-GCST90002006	105	0.0632442	0.0651062	0.333624	-0.0643639	0.190852	1.06529	0.937664	1.21028
ieu-b-85.vcf	ebi-a-GCST90002006	CD64 on monocyte	id:ebi-a-GCST90002006	105	0.065168	0.047642	0.171353	-0.0282103	0.158546	1.06734	0.972184	1.17181
ieu-b-85.vcf	ebi-a-GCST90002006	CD64 on monocyte	id:ebi-a-GCST90002006	105	0.0811625	0.0623814	0.19611	-0.041105	0.20343	1.08455	0.959728	1.2256
ieu-b-85.vcf	ebi-a-GCST90001618	HLA DR+ T cell Absolute Count	id:ebi-a-GCST90001618	94	-0.0293817	0.0317352	0.354529	-0.0915826	0.0328193	0.971046	0.912486	1.03336
ieu-b-85.vcf	ebi-a-GCST90001618	HLA DR+ T cell Absolute Count	id:ebi-a-GCST90001618	94	-0.0660038	0.0645016	0.308854	-0.192427	0.0604193	0.936127	0.824955	1.06228
ieu-b-85.vcf	ebi-a-GCST90001618	HLA DR+ T cell Absolute Count	id:ebi-a-GCST90001618	94	-0.000521161	0.0489125	0.991499	-0.0963896	0.0953473	0.999479	0.90811	1.10004
ieu-b-85.vcf	ebi-a-GCST90001618	HLA DR+ T cell Absolute Count	id:ebi-a-GCST90001618	94	0.0130756	0.0862798	0.879871	-0.156033	0.182184	1.01316	0.855531	1.19983
ieu-b-85.vcf	ebi-a-GCST90001998	PDL-1 on CD14+ CD16+ monocyte	id:ebi-a-GCST90001998	92	0.0140441	0.0323451	0.664146	-0.0493523	0.0774406	1.01414	0.951846	1.08052
ieu-b-85.vcf	ebi-a-GCST90001998	PDL-1 on CD14+ CD16+ monocyte	id:ebi-a-GCST90001998	92	0.055864	0.06543	0.395484	-0.0723788	0.184107	1.05745	0.930178	1.20214
ieu-b-85.vcf	ebi-a-GCST90001998	PDL-1 on CD14+ CD16+ monocyte	id:ebi-a-GCST90001998	92	0.0286973	0.0496919	0.563598	-0.0686988	0.126094	1.02911	0.933608	1.13439
ieu-b-85.vcf	ebi-a-GCST90001998	PDL-1 on CD14+ CD16+ monocyte	id:ebi-a-GCST90001998	92	-0.00610416	0.0735579	0.934046	-0.150278	0.138069	0.993914	0.860469	1.14806
ieu-b-85.vcf	ebi-a-GCST90001663	CD28- CD8dim T cell Absolute Count	id:ebi-a-GCST90001663	102	-0.0657821	0.0327285	0.0444382	-0.12993	-0.00163426	0.936335	0.878157	0.998367
ieu-b-85.vcf	ebi-a-GCST90001663	CD28- CD8dim T cell Absolute Count	id:ebi-a-GCST90001663	102	-0.120762	0.0669461	0.0742636	-0.251976	0.0104528	0.886245	0.777263	1.01051
ieu-b-85.vcf	ebi-a-GCST90001663	CD28- CD8dim T cell Absolute Count	id:ebi-a-GCST90001663	102	-0.0948363	0.0510834	0.0633822	-0.19496	0.00528708	0.909522	0.822868	1.0053
ieu-b-85.vcf	ebi-a-GCST90001663	CD28- CD8dim T cell Absolute Count	id:ebi-a-GCST90001663	102	-0.125795	0.0712195	0.0803671	-0.265385	0.0137953	0.881796	0.76691	1.01389
ieu-b-85.vcf	ebi-a-GCST90001908	CCR7 on naive CD8+ T cell	id:ebi-a-GCST90001908	91	-0.00322545	0.0359318	0.928473	-0.0736517	0.0672008	0.99678	0.928995	1.06951
ieu-b-85.vcf	ebi-a-GCST90001908	CCR7 on naive CD8+ T cell	id:ebi-a-GCST90001908	91	0.0484416	0.0725618	0.506122	-0.0937795	0.190663	1.04963	0.910483	1.21005
ieu-b-85.vcf	ebi-a-GCST90001908	CCR7 on naive CD8+ T cell	id:ebi-a-GCST90001908	91	-0.00340571	0.0556242	0.951178	-0.112429	0.105618	0.9966	0.893661	1.1114
ieu-b-85.vcf	ebi-a-GCST90001908	CCR7 on naive CD8+ T cell	id:ebi-a-GCST90001908	91	0.0375549	0.0861237	0.663839	-0.131248	0.206357	1.03827	0.877001	1.22919
ieu-b-85.vcf	ebi-a-GCST90001975	FSC-A on HLA DR+ T cell	id:ebi-a-GCST90001975	93	-0.0100008	0.0340732	0.769133	-0.0767842	0.0567826	0.990049	0.92609	1.05843
ieu-b-85.vcf	ebi-a-GCST90001975	FSC-A on HLA DR+ T cell	id:ebi-a-GCST90001975	93	-0.0331561	0.0691407	0.632701	-0.168672	0.10236	0.967387	0.844786	1.10778
ieu-b-85.vcf	ebi-a-GCST90001975	FSC-A on HLA DR+ T cell	id:ebi-a-GCST90001975	93	0.0455299	0.0535534	0.395227	-0.0594348	0.150495	1.04658	0.942297	1.16241
ieu-b-85.vcf	ebi-a-GCST90001975	FSC-A on HLA DR+ T cell	id:ebi-a-GCST90001975	93	0.0685369	0.0790219	0.388026	-0.086346	0.22342	1.07094	0.917277	1.25035
ieu-b-85.vcf	ebi-a-GCST90001857	CD3 on activated & secreting CD4 regulatory T cell	id:ebi-a-GCST90001857	91	0.0281708	0.0361725	0.436103	-0.0427273	0.0990689	1.02857	0.958173	1.10414
ieu-b-85.vcf	ebi-a-GCST90001857	CD3 on activated & secreting CD4 regulatory T cell	id:ebi-a-GCST90001857	91	0.0703831	0.071237	0.325825	-0.0692415	0.210008	1.07292	0.933101	1.23369
ieu-b-85.vcf	ebi-a-GCST90001857	CD3 on activated & secreting CD4 regulatory T cell	id:ebi-a-GCST90001857	91	0.00655242	0.0535644	0.902639	-0.0984339	0.111539	1.00657	0.906256	1.118
ieu-b-85.vcf	ebi-a-GCST90001857	CD3 on activated & secreting CD4 regulatory T cell	id:ebi-a-GCST90001857	91	0.011099	0.072332	0.878391	-0.130672	0.15287	1.01116	0.877506	1.16517
ieu-b-85.vcf	ebi-a-GCST90001728	CD19 on IgD+ CD38- unswitched memory B cell	id:ebi-a-GCST90001728	78	0.0232472	0.0461486	0.61444	-0.0672041	0.113698	1.02352	0.935004	1.12041
ieu-b-85.vcf	ebi-a-GCST90001728	CD19 on IgD+ CD38- unswitched memory B cell	id:ebi-a-GCST90001728	78	0.000489437	0.0926521	0.995799	-0.181109	0.182087	1.00049	0.834345	1.19972
ieu-b-85.vcf	ebi-a-GCST90001728	CD19 on IgD+ CD38- unswitched memory B cell	id:ebi-a-GCST90001728	78	0.0313596	0.0679182	0.644277	-0.10176	0.164479	1.03186	0.903246	1.17878
ieu-b-85.vcf	ebi-a-GCST90001728	CD19 on IgD+ CD38- unswitched memory B cell	id:ebi-a-GCST90001728	78	0.027916	0.0915866	0.761337	-0.151594	0.207426	1.02831	0.859337	1.23051
ieu-b-85.vcf	ebi-a-GCST90001437	Naive-mature B cell %lymphocyte	id:ebi-a-GCST90001437	91	0.0189714	0.0326905	0.56169	-0.0451019	0.0830447	1.01915	0.9559	1.08659
ieu-b-85.vcf	ebi-a-GCST90001437	Naive-mature B cell %lymphocyte	id:ebi-a-GCST90001437	91	-0.0275926	0.0660036	0.67692	-0.15696	0.101774	0.972785	0.854739	1.10713
ieu-b-85.vcf	ebi-a-GCST90001437	Naive-mature B cell %lymphocyte	id:ebi-a-GCST90001437	91	0.0125343	0.0518301	0.808908	-0.0890526	0.114121	1.01261	0.914797	1.12089
ieu-b-85.vcf	ebi-a-GCST90001437	Naive-mature B cell %lymphocyte	id:ebi-a-GCST90001437	91	-0.00690684	0.0876546	0.93737	-0.17871	0.164896	0.993117	0.836349	1.17927
ieu-b-85.vcf	ebi-a-GCST90001573	Terminally Differentiated CD4-CD8- T cell %CD4-CD8- T cell	id:ebi-a-GCST90001573	82	0.0657783	0.0336704	0.0507488	-0.000215574	0.131772	1.06799	0.999784	1.14085
ieu-b-85.vcf	ebi-a-GCST90001573	Terminally Differentiated CD4-CD8- T cell %CD4-CD8- T cell	id:ebi-a-GCST90001573	82	0.106141	0.0686065	0.125785	-0.0283274	0.24061	1.11198	0.97207	1.27202
ieu-b-85.vcf	ebi-a-GCST90001573	Terminally Differentiated CD4-CD8- T cell %CD4-CD8- T cell	id:ebi-a-GCST90001573	82	0.0476547	0.0521759	0.36106	-0.05461	0.149919	1.04881	0.946854	1.16174
ieu-b-85.vcf	ebi-a-GCST90001573	Terminally Differentiated CD4-CD8- T cell %CD4-CD8- T cell	id:ebi-a-GCST90001573	82	0.0108271	0.0948683	0.909419	-0.175115	0.196769	1.01089	0.839361	1.21746
ieu-b-85.vcf	ebi-a-GCST90002069	CD4 on CD39+ secreting CD4 regulatory T cell	id:ebi-a-GCST90002069	85	0.0413482	0.0364432	0.256546	-0.0300805	0.112777	1.04221	0.970367	1.11938
ieu-b-85.vcf	ebi-a-GCST90002069	CD4 on CD39+ secreting CD4 regulatory T cell	id:ebi-a-GCST90002069	85	-0.0373609	0.0730409	0.610355	-0.180521	0.105799	0.963328	0.834835	1.1116
ieu-b-85.vcf	ebi-a-GCST90002069	CD4 on CD39+ secreting CD4 regulatory T cell	id:ebi-a-GCST90002069	85	0.0661039	0.0521717	0.20514	-0.0361527	0.16836	1.06834	0.964493	1.18336
ieu-b-85.vcf	ebi-a-GCST90002069	CD4 on CD39+ secreting CD4 regulatory T cell	id:ebi-a-GCST90002069	85	0.0813263	0.0897639	0.367526	-0.0946109	0.257263	1.08472	0.909727	1.29339
ieu-b-85.vcf	ebi-a-GCST90001969	FSC-A on Natural Killer	id:ebi-a-GCST90001969	92	0.0175965	0.0347903	0.613006	-0.0505925	0.0857856	1.01775	0.950666	1.08957
ieu-b-85.vcf	ebi-a-GCST90001969	FSC-A on Natural Killer	id:ebi-a-GCST90001969	92	0.0325731	0.0701456	0.643509	-0.104912	0.170059	1.03311	0.900403	1.18537
ieu-b-85.vcf	ebi-a-GCST90001969	FSC-A on Natural Killer	id:ebi-a-GCST90001969	92	0.0637065	0.0529902	0.229274	-0.0401543	0.167567	1.06578	0.960641	1.18242
ieu-b-85.vcf	ebi-a-GCST90001969	FSC-A on Natural Killer	id:ebi-a-GCST90001969	92	0.0980571	0.0688705	0.157927	-0.0369291	0.233043	1.10303	0.963744	1.26244
ieu-b-85.vcf	ebi-a-GCST90001669	CD28+ CD45RA- CD8dim T cell Absolute Count	id:ebi-a-GCST90001669	91	-0.0273055	0.029808	0.359643	-0.0857292	0.0311182	0.973064	0.917843	1.03161
ieu-b-85.vcf	ebi-a-GCST90001669	CD28+ CD45RA- CD8dim T cell Absolute Count	id:ebi-a-GCST90001669	91	-0.0215028	0.059906	0.720488	-0.138919	0.0959129	0.978727	0.870299	1.10066
ieu-b-85.vcf	ebi-a-GCST90001669	CD28+ CD45RA- CD8dim T cell Absolute Count	id:ebi-a-GCST90001669	91	0.00811121	0.0437807	0.853018	-0.0776989	0.0939213	1.00814	0.925243	1.09847
ieu-b-85.vcf	ebi-a-GCST90001669	CD28+ CD45RA- CD8dim T cell Absolute Count	id:ebi-a-GCST90001669	91	0.0134495	0.0548511	0.806859	-0.0940587	0.120958	1.01354	0.910229	1.12858
ieu-b-85.vcf	ebi-a-GCST90001498	Activated & resting CD4 regulatory T cell Absolute Count	id:ebi-a-GCST90001498	88	0.0226814	0.0326374	0.487087	-0.041288	0.0866507	1.02294	0.959553	1.09052
ieu-b-85.vcf	ebi-a-GCST90001498	Activated & resting CD4 regulatory T cell Absolute Count	id:ebi-a-GCST90001498	88	-0.0200464	0.0657897	0.761328	-0.148994	0.108901	0.980153	0.861574	1.11505
ieu-b-85.vcf	ebi-a-GCST90001498	Activated & resting CD4 regulatory T cell Absolute Count	id:ebi-a-GCST90001498	88	-0.0166634	0.0496676	0.737248	-0.114012	0.080685	0.983475	0.892247	1.08403
ieu-b-85.vcf	ebi-a-GCST90001498	Activated & resting CD4 regulatory T cell Absolute Count	id:ebi-a-GCST90001498	88	-0.0373595	0.0670664	0.578922	-0.16881	0.0940907	0.96333	0.84467	1.09866
ieu-b-85.vcf	ebi-a-GCST90001778	CD25 on IgD+ CD24+ B cell	id:ebi-a-GCST90001778	95	-0.029715	0.0316769	0.34821	-0.0918017	0.0323717	0.970722	0.912286	1.0329
ieu-b-85.vcf	ebi-a-GCST90001778	CD25 on IgD+ CD24+ B cell	id:ebi-a-GCST90001778	95	-0.0646978	0.0644236	0.317861	-0.190968	0.0615724	0.937351	0.826159	1.06351
ieu-b-85.vcf	ebi-a-GCST90001778	CD25 on IgD+ CD24+ B cell	id:ebi-a-GCST90001778	95	-0.0772839	0.0470413	0.100405	-0.169485	0.014917	0.925627	0.8441	1.01503
ieu-b-85.vcf	ebi-a-GCST90001778	CD25 on IgD+ CD24+ B cell	id:ebi-a-GCST90001778	95	-0.0961065	0.0683326	0.162888	-0.230038	0.0378255	0.908367	0.794503	1.03855
ieu-b-85.vcf	ebi-a-GCST90001592	CD8+ T cell Absolute Count	id:ebi-a-GCST90001592	100	0.000968264	0.0308841	0.974989	-0.0595645	0.061501	1.00097	0.942175	1.06343
ieu-b-85.vcf	ebi-a-GCST90001592	CD8+ T cell Absolute Count	id:ebi-a-GCST90001592	100	-0.00310047	0.061824	0.960105	-0.124276	0.118075	0.996904	0.883136	1.12533
ieu-b-85.vcf	ebi-a-GCST90001592	CD8+ T cell Absolute Count	id:ebi-a-GCST90001592	100	-0.0395256	0.0493679	0.423344	-0.136287	0.0572355	0.961245	0.872592	1.05891
ieu-b-85.vcf	ebi-a-GCST90001592	CD8+ T cell Absolute Count	id:ebi-a-GCST90001592	100	-0.0442466	0.060922	0.469379	-0.163654	0.0751605	0.956718	0.849036	1.07806
ieu-b-85.vcf	ebi-a-GCST90001952	CD33 on Monocytic Myeloid-Derived Suppressor Cells	id:ebi-a-GCST90001952	75	-0.0279748	0.0508532	0.582245	-0.127647	0.0716975	0.972413	0.880164	1.07433
ieu-b-85.vcf	ebi-a-GCST90001952	CD33 on Monocytic Myeloid-Derived Suppressor Cells	id:ebi-a-GCST90001952	75	-0.123285	0.102611	0.233446	-0.324402	0.0778316	0.884011	0.722959	1.08094
ieu-b-85.vcf	ebi-a-GCST90001952	CD33 on Monocytic Myeloid-Derived Suppressor Cells	id:ebi-a-GCST90001952	75	-0.00989496	0.0741456	0.893835	-0.15522	0.13543	0.990154	0.856227	1.14503
ieu-b-85.vcf	ebi-a-GCST90001952	CD33 on Monocytic Myeloid-Derived Suppressor Cells	id:ebi-a-GCST90001952	75	-0.022155	0.114114	0.846591	-0.245818	0.201508	0.978089	0.782065	1.22325
ieu-b-85.vcf	ebi-a-GCST90002002	PDL-1 on monocyte	id:ebi-a-GCST90002002	95	0.0564713	0.0320567	0.0781362	-0.00635992	0.119302	1.0581	0.99366	1.12671
ieu-b-85.vcf	ebi-a-GCST90002002	PDL-1 on monocyte	id:ebi-a-GCST90002002	95	0.048572	0.0661065	0.464338	-0.0809967	0.178141	1.04977	0.922197	1.19499
ieu-b-85.vcf	ebi-a-GCST90002002	PDL-1 on monocyte	id:ebi-a-GCST90002002	95	0.0518988	0.0461278	0.260542	-0.0385116	0.142309	1.05327	0.962221	1.15293
ieu-b-85.vcf	ebi-a-GCST90002002	PDL-1 on monocyte	id:ebi-a-GCST90002002	95	0.0680545	0.0714455	0.343268	-0.0719787	0.208088	1.07042	0.930551	1.23132
ieu-b-85.vcf	ebi-a-GCST90001404	Plasma Blast-Plasma Cell %B cell	id:ebi-a-GCST90001404	82	0.0105146	0.0335282	0.753821	-0.0552006	0.0762299	1.01057	0.946295	1.07921
ieu-b-85.vcf	ebi-a-GCST90001404	Plasma Blast-Plasma Cell %B cell	id:ebi-a-GCST90001404	82	-0.0438654	0.067124	0.515309	-0.175428	0.0876977	0.957083	0.839097	1.09166
ieu-b-85.vcf	ebi-a-GCST90001404	Plasma Blast-Plasma Cell %B cell	id:ebi-a-GCST90001404	82	-0.0339393	0.051331	0.508494	-0.134548	0.0666694	0.96663	0.874111	1.06894
ieu-b-85.vcf	ebi-a-GCST90001404	Plasma Blast-Plasma Cell %B cell	id:ebi-a-GCST90001404	82	-0.113382	0.0823282	0.172244	-0.274746	0.0479808	0.892809	0.759765	1.04915
ieu-b-85.vcf	ebi-a-GCST90001392	IgD+ CD38+ B cell Absolute Count	id:ebi-a-GCST90001392	92	0.0291185	0.0314298	0.354206	-0.0324839	0.0907208	1.02955	0.968038	1.09496
ieu-b-85.vcf	ebi-a-GCST90001392	IgD+ CD38+ B cell Absolute Count	id:ebi-a-GCST90001392	92	0.0174231	0.0645047	0.787698	-0.109006	0.143852	1.01758	0.896725	1.15471
ieu-b-85.vcf	ebi-a-GCST90001392	IgD+ CD38+ B cell Absolute Count	id:ebi-a-GCST90001392	92	0.000407452	0.0480955	0.993241	-0.0938598	0.0946747	1.00041	0.91041	1.0993
ieu-b-85.vcf	ebi-a-GCST90001392	IgD+ CD38+ B cell Absolute Count	id:ebi-a-GCST90001392	92	-0.028433	0.0620016	0.647625	-0.149956	0.09309	0.971967	0.860746	1.09756
ieu-b-85.vcf	ebi-a-GCST90001872	HVEM on naive CD8+ T cell	id:ebi-a-GCST90001872	63	0.00281277	0.0600054	0.962613	-0.114798	0.120423	1.00282	0.891546	1.12797
ieu-b-85.vcf	ebi-a-GCST90001872	HVEM on naive CD8+ T cell	id:ebi-a-GCST90001872	63	-0.0430308	0.11655	0.713254	-0.271469	0.185407	0.957882	0.762259	1.20371
ieu-b-85.vcf	ebi-a-GCST90001872	HVEM on naive CD8+ T cell	id:ebi-a-GCST90001872	63	0.00346822	0.0923491	0.970042	-0.177536	0.184473	1.00347	0.837331	1.20258
ieu-b-85.vcf	ebi-a-GCST90001872	HVEM on naive CD8+ T cell	id:ebi-a-GCST90001872	63	0.0407533	0.134017	0.762077	-0.22192	0.303426	1.0416	0.80098	1.35449
ieu-b-85.vcf	ebi-a-GCST90001929	CD127 on CD28+ CD45RA+ CD8+ T cell	id:ebi-a-GCST90001929	90	-0.000403356	0.0354859	0.990931	-0.0699557	0.069149	0.999597	0.932435	1.0716
ieu-b-85.vcf	ebi-a-GCST90001929	CD127 on CD28+ CD45RA+ CD8+ T cell	id:ebi-a-GCST90001929	90	0.0467134	0.071756	0.516741	-0.0939284	0.187355	1.04782	0.910348	1.20606
ieu-b-85.vcf	ebi-a-GCST90001929	CD127 on CD28+ CD45RA+ CD8+ T cell	id:ebi-a-GCST90001929	90	0.0172912	0.0529513	0.744009	-0.0864933	0.121076	1.01744	0.917142	1.12871
ieu-b-85.vcf	ebi-a-GCST90001929	CD127 on CD28+ CD45RA+ CD8+ T cell	id:ebi-a-GCST90001929	90	0.0553673	0.0730336	0.45039	-0.0877787	0.198513	1.05693	0.915964	1.21959
ieu-b-85.vcf	ebi-a-GCST90001461	Dendritic Cell Absolute Count	id:ebi-a-GCST90001461	91	0.00257513	0.0331461	0.938075	-0.0623912	0.0675415	1.00258	0.939515	1.06987
ieu-b-85.vcf	ebi-a-GCST90001461	Dendritic Cell Absolute Count	id:ebi-a-GCST90001461	91	0.0303554	0.0664294	0.648815	-0.0998462	0.160557	1.03082	0.904977	1.17416
ieu-b-85.vcf	ebi-a-GCST90001461	Dendritic Cell Absolute Count	id:ebi-a-GCST90001461	91	-0.0104616	0.0519869	0.840514	-0.112356	0.0914327	0.989593	0.893726	1.09574
ieu-b-85.vcf	ebi-a-GCST90001461	Dendritic Cell Absolute Count	id:ebi-a-GCST90001461	91	-0.0379414	0.0705211	0.591895	-0.176163	0.10028	0.962769	0.838482	1.10548
ieu-b-85.vcf	ebi-a-GCST90001890	CD28 on CD45RA+ CD4+ T cell	id:ebi-a-GCST90001890	78	-0.0191791	0.0400258	0.631819	-0.0976296	0.0592715	0.981004	0.906985	1.06106
ieu-b-85.vcf	ebi-a-GCST90001890	CD28 on CD45RA+ CD4+ T cell	id:ebi-a-GCST90001890	78	-0.0104164	0.0875469	0.905604	-0.182008	0.161176	0.989638	0.833594	1.17489
ieu-b-85.vcf	ebi-a-GCST90001890	CD28 on CD45RA+ CD4+ T cell	id:ebi-a-GCST90001890	78	-0.0294459	0.0595128	0.620754	-0.146091	0.0871993	0.970983	0.864079	1.09111
ieu-b-85.vcf	ebi-a-GCST90001890	CD28 on CD45RA+ CD4+ T cell	id:ebi-a-GCST90001890	78	-0.0732084	0.101247	0.471831	-0.271653	0.125236	0.929407	0.762119	1.13342
ieu-b-85.vcf	ebi-a-GCST90001507	CD25++ CD45RA+ CD4 not regulatory T cell Absolute Count	id:ebi-a-GCST90001507	90	-0.0268613	0.0341599	0.431669	-0.0938148	0.0400922	0.973496	0.910451	1.04091
ieu-b-85.vcf	ebi-a-GCST90001507	CD25++ CD45RA+ CD4 not regulatory T cell Absolute Count	id:ebi-a-GCST90001507	90	0.0110046	0.0689334	0.87353	-0.124105	0.146114	1.01107	0.883287	1.15733
ieu-b-85.vcf	ebi-a-GCST90001507	CD25++ CD45RA+ CD4 not regulatory T cell Absolute Count	id:ebi-a-GCST90001507	90	0.00129233	0.0510317	0.979796	-0.0987297	0.101314	1.00129	0.905988	1.10662
ieu-b-85.vcf	ebi-a-GCST90001507	CD25++ CD45RA+ CD4 not regulatory T cell Absolute Count	id:ebi-a-GCST90001507	90	0.00322576	0.0720746	0.964402	-0.13804	0.144492	1.00323	0.871064	1.15545
ieu-b-85.vcf	ebi-a-GCST90001424	IgD+ B cell %Lymphocyte	id:ebi-a-GCST90001424	92	0.00675522	0.0317478	0.8315	-0.0554704	0.0689808	1.00678	0.94604	1.07142
ieu-b-85.vcf	ebi-a-GCST90001424	IgD+ B cell %Lymphocyte	id:ebi-a-GCST90001424	92	-0.0279955	0.0643239	0.66444	-0.15407	0.0980794	0.972393	0.857212	1.10305
ieu-b-85.vcf	ebi-a-GCST90001424	IgD+ B cell %Lymphocyte	id:ebi-a-GCST90001424	92	-0.00783558	0.0499311	0.875302	-0.105701	0.0900294	0.992195	0.899694	1.09421
ieu-b-85.vcf	ebi-a-GCST90001424	IgD+ B cell %Lymphocyte	id:ebi-a-GCST90001424	92	-0.0167279	0.0902974	0.853442	-0.193711	0.160255	0.983411	0.823896	1.17381
ieu-b-85.vcf	ebi-a-GCST90001554	Effector Memory CD8+ T cell Absolute Count	id:ebi-a-GCST90001554	93	-0.0145012	0.0339294	0.669094	-0.0810029	0.0520005	0.985603	0.922191	1.05338
ieu-b-85.vcf	ebi-a-GCST90001554	Effector Memory CD8+ T cell Absolute Count	id:ebi-a-GCST90001554	93	-0.0241636	0.0676631	0.721831	-0.156783	0.108456	0.976126	0.854889	1.11456
ieu-b-85.vcf	ebi-a-GCST90001554	Effector Memory CD8+ T cell Absolute Count	id:ebi-a-GCST90001554	93	-0.0216306	0.0511976	0.672666	-0.121978	0.0787166	0.978602	0.885168	1.0819
ieu-b-85.vcf	ebi-a-GCST90001554	Effector Memory CD8+ T cell Absolute Count	id:ebi-a-GCST90001554	93	-0.0421873	0.0706364	0.551811	-0.180635	0.0962601	0.95869	0.83474	1.10105
ieu-b-85.vcf	ebi-a-GCST90001487	Activated CD4 regulatory T cell %CD4 regulatory T cell	id:ebi-a-GCST90001487	90	0.0293506	0.0324866	0.366278	-0.0343232	0.0930244	1.02979	0.966259	1.09749
ieu-b-85.vcf	ebi-a-GCST90001487	Activated CD4 regulatory T cell %CD4 regulatory T cell	id:ebi-a-GCST90001487	90	0.074093	0.065976	0.26448	-0.05522	0.203406	1.07691	0.946277	1.22557
ieu-b-85.vcf	ebi-a-GCST90001487	Activated CD4 regulatory T cell %CD4 regulatory T cell	id:ebi-a-GCST90001487	90	0.0253311	0.0483025	0.599982	-0.0693418	0.120004	1.02565	0.933008	1.1275
ieu-b-85.vcf	ebi-a-GCST90001487	Activated CD4 regulatory T cell %CD4 regulatory T cell	id:ebi-a-GCST90001487	90	0.0385874	0.0685652	0.574997	-0.0958004	0.172975	1.03934	0.908645	1.18884
ieu-b-85.vcf	ebi-a-GCST90001477	HLA DR++ monocyte Absolute Count	id:ebi-a-GCST90001477	95	-0.0413542	0.0319462	0.195493	-0.103969	0.0212602	0.959489	0.901254	1.02149
ieu-b-85.vcf	ebi-a-GCST90001477	HLA DR++ monocyte Absolute Count	id:ebi-a-GCST90001477	95	-0.0612472	0.0659083	0.355151	-0.190428	0.0679331	0.940591	0.826606	1.07029
ieu-b-85.vcf	ebi-a-GCST90001477	HLA DR++ monocyte Absolute Count	id:ebi-a-GCST90001477	95	-0.0644416	0.047363	0.173644	-0.157273	0.0283899	0.937591	0.854471	1.0288
ieu-b-85.vcf	ebi-a-GCST90001477	HLA DR++ monocyte Absolute Count	id:ebi-a-GCST90001477	95	-0.0927986	0.067124	0.170095	-0.224362	0.0387643	0.911377	0.799026	1.03953
ieu-b-85.vcf	ebi-a-GCST90001528	CD33dim HLA DR+ CD11b- %CD33dim HLA DR+	id:ebi-a-GCST90001528	84	0.0367527	0.0456539	0.420802	-0.0527289	0.126234	1.03744	0.948637	1.13455
ieu-b-85.vcf	ebi-a-GCST90001528	CD33dim HLA DR+ CD11b- %CD33dim HLA DR+	id:ebi-a-GCST90001528	84	0.106425	0.0907149	0.244121	-0.0713765	0.284226	1.11229	0.931111	1.32873
ieu-b-85.vcf	ebi-a-GCST90001528	CD33dim HLA DR+ CD11b- %CD33dim HLA DR+	id:ebi-a-GCST90001528	84	0.0374041	0.0650687	0.565399	-0.0901306	0.164939	1.03811	0.913812	1.17932
ieu-b-85.vcf	ebi-a-GCST90001528	CD33dim HLA DR+ CD11b- %CD33dim HLA DR+	id:ebi-a-GCST90001528	84	0.126805	0.0854387	0.141552	-0.0406544	0.294265	1.1352	0.960161	1.34214
ieu-b-85.vcf	ebi-a-GCST90001770	CD24 on IgD- CD38dim B cell	id:ebi-a-GCST90001770	20	-0.0496931	0.0738888	0.50124	-0.194515	0.0951288	0.951521	0.823234	1.0998
ieu-b-85.vcf	ebi-a-GCST90001770	CD24 on IgD- CD38dim B cell	id:ebi-a-GCST90001770	20	0.0178283	0.176616	0.920711	-0.328339	0.363995	1.01799	0.720119	1.43907
ieu-b-85.vcf	ebi-a-GCST90001770	CD24 on IgD- CD38dim B cell	id:ebi-a-GCST90001770	20	-0.0967914	0.106586	0.363823	-0.3057	0.112117	0.907745	0.736607	1.11864
ieu-b-85.vcf	ebi-a-GCST90001770	CD24 on IgD- CD38dim B cell	id:ebi-a-GCST90001770	20	-0.10017	0.132403	0.458595	-0.35968	0.15934	0.904683	0.697899	1.17274
ieu-b-85.vcf	ebi-a-GCST90001788	CD25 on IgD- CD38+ B cell	id:ebi-a-GCST90001788	94	-0.00860657	0.0318598	0.787053	-0.0710517	0.0538385	0.99143	0.931414	1.05531
ieu-b-85.vcf	ebi-a-GCST90001788	CD25 on IgD- CD38+ B cell	id:ebi-a-GCST90001788	94	-0.0035823	0.0652489	0.956336	-0.13147	0.124306	0.996424	0.876805	1.13236
ieu-b-85.vcf	ebi-a-GCST90001788	CD25 on IgD- CD38+ B cell	id:ebi-a-GCST90001788	94	0.0156749	0.0483618	0.745849	-0.0791142	0.110464	1.0158	0.923934	1.1168
ieu-b-85.vcf	ebi-a-GCST90001788	CD25 on IgD- CD38+ B cell	id:ebi-a-GCST90001788	94	0.00964567	0.0721318	0.893911	-0.131733	0.151024	1.00969	0.876575	1.16302
ieu-b-85.vcf	ebi-a-GCST90001569	Effector Memory CD4-CD8- T cell Absolute Count	id:ebi-a-GCST90001569	97	-0.0520679	0.0309488	0.0924932	-0.112727	0.00859168	0.949264	0.893394	1.00863
ieu-b-85.vcf	ebi-a-GCST90001569	Effector Memory CD4-CD8- T cell Absolute Count	id:ebi-a-GCST90001569	97	-0.133348	0.0621914	0.0345727	-0.255243	-0.011453	0.87516	0.774728	0.988612
ieu-b-85.vcf	ebi-a-GCST90001569	Effector Memory CD4-CD8- T cell Absolute Count	id:ebi-a-GCST90001569	97	-0.0543318	0.0463384	0.240997	-0.145155	0.0364915	0.947118	0.864888	1.03717
ieu-b-85.vcf	ebi-a-GCST90001569	Effector Memory CD4-CD8- T cell Absolute Count	id:ebi-a-GCST90001569	97	-0.0638913	0.0623855	0.308344	-0.186167	0.0583843	0.938107	0.830135	1.06012
ieu-b-85.vcf	ebi-a-GCST90001876	HVEM on Central Memory CD4+ T cell	id:ebi-a-GCST90001876	64	-0.022288	0.0606903	0.713439	-0.141241	0.096665	0.977959	0.86828	1.10149
ieu-b-85.vcf	ebi-a-GCST90001876	HVEM on Central Memory CD4+ T cell	id:ebi-a-GCST90001876	64	-0.067729	0.115732	0.560523	-0.294564	0.159107	0.934514	0.744856	1.17246
ieu-b-85.vcf	ebi-a-GCST90001876	HVEM on Central Memory CD4+ T cell	id:ebi-a-GCST90001876	64	-0.0390029	0.0896968	0.663685	-0.214809	0.136803	0.961748	0.806696	1.1466
ieu-b-85.vcf	ebi-a-GCST90001876	HVEM on Central Memory CD4+ T cell	id:ebi-a-GCST90001876	64	-0.0666334	0.115207	0.565069	-0.292439	0.159172	0.935538	0.746441	1.17254
ieu-b-85.vcf	ebi-a-GCST90001884	CD16-CD56 on Natural Killer	id:ebi-a-GCST90001884	84	0.0246992	0.0371369	0.505997	-0.0480892	0.0974875	1.02501	0.953049	1.1024
ieu-b-85.vcf	ebi-a-GCST90001884	CD16-CD56 on Natural Killer	id:ebi-a-GCST90001884	84	0.0827224	0.0742211	0.268304	-0.0627511	0.228196	1.08624	0.939177	1.25633
ieu-b-85.vcf	ebi-a-GCST90001884	CD16-CD56 on Natural Killer	id:ebi-a-GCST90001884	84	0.0560732	0.057175	0.326726	-0.0559898	0.168136	1.05768	0.945549	1.1831
ieu-b-85.vcf	ebi-a-GCST90001884	CD16-CD56 on Natural Killer	id:ebi-a-GCST90001884	84	0.0607323	0.0727215	0.406039	-0.0818018	0.203266	1.06261	0.921455	1.2254
ieu-b-85.vcf	ebi-a-GCST90002019	CD14 on Monocytic Myeloid-Derived Suppressor Cells	id:ebi-a-GCST90002019	72	0.0146171	0.0489882	0.765414	-0.0813998	0.110634	1.01472	0.921825	1.11699
ieu-b-85.vcf	ebi-a-GCST90002019	CD14 on Monocytic Myeloid-Derived Suppressor Cells	id:ebi-a-GCST90002019	72	-0.0243478	0.101344	0.81084	-0.222982	0.174287	0.975946	0.800129	1.1904
ieu-b-85.vcf	ebi-a-GCST90002019	CD14 on Monocytic Myeloid-Derived Suppressor Cells	id:ebi-a-GCST90002019	72	0.032171	0.0685973	0.639081	-0.10228	0.166622	1.03269	0.902777	1.18131
ieu-b-85.vcf	ebi-a-GCST90002019	CD14 on Monocytic Myeloid-Derived Suppressor Cells	id:ebi-a-GCST90002019	72	0.00253454	0.104335	0.980688	-0.201963	0.207032	1.00254	0.817125	1.23002
ieu-b-85.vcf	ebi-a-GCST90002087	CD11c on myeloid Dendritic Cell	id:ebi-a-GCST90002087	78	-0.0142145	0.0375675	0.705155	-0.0878468	0.0594178	0.985886	0.915901	1.06122
ieu-b-85.vcf	ebi-a-GCST90002087	CD11c on myeloid Dendritic Cell	id:ebi-a-GCST90002087	78	-0.0312114	0.076617	0.684882	-0.181381	0.118958	0.969271	0.834118	1.12632
ieu-b-85.vcf	ebi-a-GCST90002087	CD11c on myeloid Dendritic Cell	id:ebi-a-GCST90002087	78	-0.0111098	0.0615339	0.856722	-0.131716	0.109497	0.988952	0.87659	1.11572
ieu-b-85.vcf	ebi-a-GCST90002087	CD11c on myeloid Dendritic Cell	id:ebi-a-GCST90002087	78	0.00774046	0.09286	0.933785	-0.174265	0.189746	1.00777	0.840074	1.20894
ieu-b-85.vcf	ebi-a-GCST90001860	CD3 on CD39+ CD4+ T cell	id:ebi-a-GCST90001860	86	0.0250757	0.0371775	0.500002	-0.0477922	0.0979437	1.02539	0.953332	1.1029
ieu-b-85.vcf	ebi-a-GCST90001860	CD3 on CD39+ CD4+ T cell	id:ebi-a-GCST90001860	86	0.059168	0.074756	0.430892	-0.0873538	0.20569	1.06095	0.916353	1.22837
ieu-b-85.vcf	ebi-a-GCST90001860	CD3 on CD39+ CD4+ T cell	id:ebi-a-GCST90001860	86	0.00643701	0.0550547	0.906923	-0.10147	0.114344	1.00646	0.903508	1.12114
ieu-b-85.vcf	ebi-a-GCST90001860	CD3 on CD39+ CD4+ T cell	id:ebi-a-GCST90001860	86	0.0254029	0.0686192	0.712153	-0.109091	0.159896	1.02573	0.896649	1.17339
ieu-b-85.vcf	ebi-a-GCST90001474	Plasmacytoid Dendritic Cell %Dendritic Cell	id:ebi-a-GCST90001474	89	-0.00878682	0.0334378	0.792719	-0.0743248	0.0567512	0.991252	0.92837	1.05839
ieu-b-85.vcf	ebi-a-GCST90001474	Plasmacytoid Dendritic Cell %Dendritic Cell	id:ebi-a-GCST90001474	89	-0.00409524	0.0660652	0.950715	-0.133583	0.125393	0.995913	0.874955	1.13359
ieu-b-85.vcf	ebi-a-GCST90001474	Plasmacytoid Dendritic Cell %Dendritic Cell	id:ebi-a-GCST90001474	89	-0.0226543	0.0493142	0.645956	-0.11931	0.0740015	0.9776	0.887533	1.07681
ieu-b-85.vcf	ebi-a-GCST90001474	Plasmacytoid Dendritic Cell %Dendritic Cell	id:ebi-a-GCST90001474	89	-0.0285445	0.0647843	0.660577	-0.155522	0.0984327	0.971859	0.855969	1.10344
ieu-b-85.vcf	ebi-a-GCST90001602	Lymphocyte %leukocyte	id:ebi-a-GCST90001602	94	-0.0106163	0.032206	0.741675	-0.0737401	0.0525075	0.98944	0.928913	1.05391
ieu-b-85.vcf	ebi-a-GCST90001602	Lymphocyte %leukocyte	id:ebi-a-GCST90001602	94	-0.0469228	0.0644242	0.468255	-0.173194	0.0793487	0.954161	0.840974	1.08258
ieu-b-85.vcf	ebi-a-GCST90001602	Lymphocyte %leukocyte	id:ebi-a-GCST90001602	94	-0.072005	0.0484732	0.137421	-0.167012	0.0230023	0.930526	0.846189	1.02327
ieu-b-85.vcf	ebi-a-GCST90001602	Lymphocyte %leukocyte	id:ebi-a-GCST90001602	94	-0.0934201	0.0736933	0.208074	-0.237859	0.0510187	0.910811	0.788314	1.05234
ieu-b-85.vcf	ebi-a-GCST90001578	Transitional B cell %lymphocyte	id:ebi-a-GCST90001578	97	0.0235055	0.0314064	0.454201	-0.0380511	0.085062	1.02378	0.962664	1.08878
ieu-b-85.vcf	ebi-a-GCST90001578	Transitional B cell %lymphocyte	id:ebi-a-GCST90001578	97	0.0283732	0.063771	0.657387	-0.0966179	0.153364	1.02878	0.907903	1.16575
ieu-b-85.vcf	ebi-a-GCST90001578	Transitional B cell %lymphocyte	id:ebi-a-GCST90001578	97	0.0334962	0.0475772	0.481408	-0.0597551	0.126747	1.03406	0.941995	1.13513
ieu-b-85.vcf	ebi-a-GCST90001578	Transitional B cell %lymphocyte	id:ebi-a-GCST90001578	97	0.0474488	0.0687811	0.491951	-0.0873621	0.18226	1.04859	0.916345	1.19993
ieu-b-85.vcf	ebi-a-GCST90002114	HLA DR on HLA DR+ CD4+ T cell	id:ebi-a-GCST90002114	83	0.00476188	0.0357692	0.894092	-0.0653458	0.0748696	1.00477	0.936743	1.07774
ieu-b-85.vcf	ebi-a-GCST90002114	HLA DR on HLA DR+ CD4+ T cell	id:ebi-a-GCST90002114	83	0.0711803	0.0707981	0.317699	-0.0675839	0.209945	1.07377	0.934649	1.23361
ieu-b-85.vcf	ebi-a-GCST90002114	HLA DR on HLA DR+ CD4+ T cell	id:ebi-a-GCST90002114	83	0.0192817	0.0519587	0.710565	-0.0825573	0.121121	1.01947	0.920759	1.12876
ieu-b-85.vcf	ebi-a-GCST90002114	HLA DR on HLA DR+ CD4+ T cell	id:ebi-a-GCST90002114	83	0.00737918	0.0727375	0.919441	-0.135186	0.149945	1.00741	0.873553	1.16177
ieu-b-85.vcf	ebi-a-GCST90001894	CD28 on CD28+ CD4+ T cell	id:ebi-a-GCST90001894	89	0.032876	0.0360141	0.361315	-0.0377117	0.103464	1.03342	0.96299	1.10901
ieu-b-85.vcf	ebi-a-GCST90001894	CD28 on CD28+ CD4+ T cell	id:ebi-a-GCST90001894	89	0.0276431	0.0728037	0.705098	-0.115052	0.170338	1.02803	0.89132	1.18571
ieu-b-85.vcf	ebi-a-GCST90001894	CD28 on CD28+ CD4+ T cell	id:ebi-a-GCST90001894	89	0.0237713	0.053703	0.658024	-0.0814867	0.129029	1.02406	0.921745	1.13772
ieu-b-85.vcf	ebi-a-GCST90001894	CD28 on CD28+ CD4+ T cell	id:ebi-a-GCST90001894	89	0.0437562	0.0634346	0.492145	-0.0805756	0.168088	1.04473	0.922585	1.18304
ieu-b-85.vcf	ebi-a-GCST90001549	Central Memory CD8+ T cell %CD8+ T cell	id:ebi-a-GCST90001549	91	0.00247199	0.0327751	0.939878	-0.0617671	0.0667111	1.00248	0.940102	1.06899
ieu-b-85.vcf	ebi-a-GCST90001549	Central Memory CD8+ T cell %CD8+ T cell	id:ebi-a-GCST90001549	91	-0.0106949	0.0651596	0.869998	-0.138408	0.117018	0.989362	0.870744	1.12414
ieu-b-85.vcf	ebi-a-GCST90001549	Central Memory CD8+ T cell %CD8+ T cell	id:ebi-a-GCST90001549	91	0.0357818	0.050048	0.47464	-0.0623122	0.133876	1.03643	0.93959	1.14325
ieu-b-85.vcf	ebi-a-GCST90001549	Central Memory CD8+ T cell %CD8+ T cell	id:ebi-a-GCST90001549	91	0.0701926	0.0716739	0.330041	-0.0702883	0.210673	1.07271	0.932125	1.23451
ieu-b-85.vcf	ebi-a-GCST90001785	CD25 on IgD- CD24- B cell	id:ebi-a-GCST90001785	95	-0.00656128	0.0320918	0.837999	-0.0694611	0.0563386	0.99346	0.932896	1.05796
ieu-b-85.vcf	ebi-a-GCST90001785	CD25 on IgD- CD24- B cell	id:ebi-a-GCST90001785	95	-0.00670953	0.0648892	0.917868	-0.133892	0.120473	0.993313	0.874684	1.12803
ieu-b-85.vcf	ebi-a-GCST90001785	CD25 on IgD- CD24- B cell	id:ebi-a-GCST90001785	95	0.000595503	0.0480991	0.990122	-0.0936787	0.0948697	1.0006	0.910575	1.09952
ieu-b-85.vcf	ebi-a-GCST90001785	CD25 on IgD- CD24- B cell	id:ebi-a-GCST90001785	95	-0.0112733	0.0643651	0.861341	-0.137429	0.114882	0.98879	0.871596	1.12174
ieu-b-85.vcf	ebi-a-GCST90002062	CD4 on CD28+ CD4+ T cell	id:ebi-a-GCST90002062	89	-0.0238479	0.0367834	0.516769	-0.0959433	0.0482475	0.976434	0.908515	1.04943
ieu-b-85.vcf	ebi-a-GCST90002062	CD4 on CD28+ CD4+ T cell	id:ebi-a-GCST90002062	89	-0.0430433	0.0722666	0.552977	-0.184686	0.0985992	0.95787	0.831365	1.10362
ieu-b-85.vcf	ebi-a-GCST90002062	CD4 on CD28+ CD4+ T cell	id:ebi-a-GCST90002062	89	-0.0379928	0.0556136	0.494509	-0.146995	0.07101	0.96272	0.863298	1.07359
ieu-b-85.vcf	ebi-a-GCST90002062	CD4 on CD28+ CD4+ T cell	id:ebi-a-GCST90002062	89	-0.0779695	0.0813832	0.34066	-0.237481	0.0815415	0.924993	0.788612	1.08496
ieu-b-85.vcf	ebi-a-GCST90001522	CD33- HLA DR- Absolute Count	id:ebi-a-GCST90001522	69	0.0155968	0.0466579	0.738168	-0.0758526	0.107046	1.01572	0.926953	1.11299
ieu-b-85.vcf	ebi-a-GCST90001522	CD33- HLA DR- Absolute Count	id:ebi-a-GCST90001522	69	0.0262785	0.0929235	0.778205	-0.155852	0.208409	1.02663	0.855686	1.23172
ieu-b-85.vcf	ebi-a-GCST90001522	CD33- HLA DR- Absolute Count	id:ebi-a-GCST90001522	69	-0.0151713	0.07081	0.830349	-0.153959	0.123616	0.984943	0.857307	1.13158
ieu-b-85.vcf	ebi-a-GCST90001522	CD33- HLA DR- Absolute Count	id:ebi-a-GCST90001522	69	-0.0351702	0.10272	0.733115	-0.236502	0.166162	0.965441	0.789384	1.18076
ieu-b-85.vcf	ebi-a-GCST90001736	CD19 on memory B cell	id:ebi-a-GCST90001736	92	-0.0104699	0.0320917	0.744235	-0.0733697	0.0524298	0.989585	0.929257	1.05383
ieu-b-85.vcf	ebi-a-GCST90001736	CD19 on memory B cell	id:ebi-a-GCST90001736	92	-0.00581905	0.0652528	0.929139	-0.133714	0.122076	0.994198	0.87484	1.12984
ieu-b-85.vcf	ebi-a-GCST90001736	CD19 on memory B cell	id:ebi-a-GCST90001736	92	-0.00637247	0.0462452	0.890401	-0.0970131	0.0842682	0.993648	0.907544	1.08792
ieu-b-85.vcf	ebi-a-GCST90001736	CD19 on memory B cell	id:ebi-a-GCST90001736	92	-0.00308203	0.0613027	0.960013	-0.123235	0.117071	0.996923	0.884056	1.1242
ieu-b-85.vcf	ebi-a-GCST90001919	CD45 on Natural Killer T	id:ebi-a-GCST90001919	88	-0.0116634	0.0356618	0.743626	-0.0815604	0.0582337	0.988404	0.921677	1.05996
ieu-b-85.vcf	ebi-a-GCST90001919	CD45 on Natural Killer T	id:ebi-a-GCST90001919	88	0.0550536	0.0727579	0.451317	-0.0875519	0.197659	1.0566	0.916171	1.21855
ieu-b-85.vcf	ebi-a-GCST90001919	CD45 on Natural Killer T	id:ebi-a-GCST90001919	88	-0.00365046	0.0554685	0.947528	-0.112369	0.105068	0.996356	0.893715	1.11079
ieu-b-85.vcf	ebi-a-GCST90001919	CD45 on Natural Killer T	id:ebi-a-GCST90001919	88	0.0516714	0.072689	0.479075	-0.0907991	0.194142	1.05303	0.913201	1.21427
ieu-b-85.vcf	ebi-a-GCST90001585	CD14+ CD16+ monocyte %monocyte	id:ebi-a-GCST90001585	95	-0.00154275	0.0322594	0.961857	-0.0647712	0.0616857	0.998458	0.937282	1.06363
ieu-b-85.vcf	ebi-a-GCST90001585	CD14+ CD16+ monocyte %monocyte	id:ebi-a-GCST90001585	95	-0.0312	0.0642251	0.628258	-0.157081	0.0946812	0.969282	0.854635	1.09931
ieu-b-85.vcf	ebi-a-GCST90001585	CD14+ CD16+ monocyte %monocyte	id:ebi-a-GCST90001585	95	-0.010051	0.0472202	0.83144	-0.102603	0.0825005	0.989999	0.902486	1.086
ieu-b-85.vcf	ebi-a-GCST90001585	CD14+ CD16+ monocyte %monocyte	id:ebi-a-GCST90001585	95	-0.00723436	0.0563109	0.89805	-0.117604	0.103135	0.992792	0.889048	1.10864
ieu-b-85.vcf	ebi-a-GCST90002021	CD14 on CD33dim HLA DR+ CD11b+	id:ebi-a-GCST90002021	71	0.0257045	0.0496429	0.604606	-0.0715955	0.123004	1.02604	0.930907	1.13089
ieu-b-85.vcf	ebi-a-GCST90002021	CD14 on CD33dim HLA DR+ CD11b+	id:ebi-a-GCST90002021	71	0.0604946	0.0998946	0.546778	-0.135299	0.256288	1.06236	0.873455	1.29212
ieu-b-85.vcf	ebi-a-GCST90002021	CD14 on CD33dim HLA DR+ CD11b+	id:ebi-a-GCST90002021	71	-0.00226783	0.06885	0.973723	-0.137214	0.132678	0.997735	0.871784	1.14188
ieu-b-85.vcf	ebi-a-GCST90002021	CD14 on CD33dim HLA DR+ CD11b+	id:ebi-a-GCST90002021	71	-0.0735487	0.102281	0.474481	-0.274019	0.126921	0.929091	0.760318	1.13533
ieu-b-85.vcf	ebi-a-GCST90001587	CD16+ monocyte %monocyte	id:ebi-a-GCST90001587	97	-0.0101931	0.031684	0.747671	-0.0722938	0.0519075	0.989859	0.930258	1.05328
ieu-b-85.vcf	ebi-a-GCST90001587	CD16+ monocyte %monocyte	id:ebi-a-GCST90001587	97	-0.0217023	0.0633917	0.732842	-0.14595	0.102545	0.978532	0.864201	1.10799
ieu-b-85.vcf	ebi-a-GCST90001587	CD16+ monocyte %monocyte	id:ebi-a-GCST90001587	97	-0.0270177	0.0475997	0.570306	-0.120313	0.0662778	0.973344	0.886643	1.06852
ieu-b-85.vcf	ebi-a-GCST90001587	CD16+ monocyte %monocyte	id:ebi-a-GCST90001587	97	-0.0405115	0.065138	0.53546	-0.168182	0.087159	0.960298	0.8452	1.09107
ieu-b-85.vcf	ebi-a-GCST90001955	CD33 on Immature Myeloid-Derived Suppressor Cells	id:ebi-a-GCST90001955	67	-0.0632198	0.0520313	0.224353	-0.165201	0.0387615	0.938737	0.847723	1.03952
ieu-b-85.vcf	ebi-a-GCST90001955	CD33 on Immature Myeloid-Derived Suppressor Cells	id:ebi-a-GCST90001955	67	-0.158028	0.105467	0.138882	-0.364744	0.0486886	0.853826	0.694374	1.04989
ieu-b-85.vcf	ebi-a-GCST90001955	CD33 on Immature Myeloid-Derived Suppressor Cells	id:ebi-a-GCST90001955	67	-0.110858	0.0791434	0.161298	-0.265979	0.0442635	0.895066	0.766455	1.04526
ieu-b-85.vcf	ebi-a-GCST90001955	CD33 on Immature Myeloid-Derived Suppressor Cells	id:ebi-a-GCST90001955	67	-0.201975	0.12558	0.112535	-0.448111	0.0441615	0.817115	0.638834	1.04515
ieu-b-85.vcf	ebi-a-GCST90001938	CD25 on CD39+ resting CD4 regulatory T cell	id:ebi-a-GCST90001938	88	0.0227232	0.034051	0.504563	-0.0440167	0.0894631	1.02298	0.956938	1.09359
ieu-b-85.vcf	ebi-a-GCST90001938	CD25 on CD39+ resting CD4 regulatory T cell	id:ebi-a-GCST90001938	88	0.0520623	0.0691437	0.453532	-0.0834595	0.187584	1.05344	0.919928	1.20633
ieu-b-85.vcf	ebi-a-GCST90001938	CD25 on CD39+ resting CD4 regulatory T cell	id:ebi-a-GCST90001938	88	0.049772	0.0531518	0.34906	-0.0544054	0.153949	1.05103	0.947048	1.16643
ieu-b-85.vcf	ebi-a-GCST90001938	CD25 on CD39+ resting CD4 regulatory T cell	id:ebi-a-GCST90001938	88	0.0777717	0.0724034	0.285728	-0.0641389	0.219682	1.08088	0.937875	1.24568
ieu-b-85.vcf	ebi-a-GCST90001561	CD45RA+ CD8+ T cell %CD8+ T cell	id:ebi-a-GCST90001561	90	0.00455347	0.0282317	0.871866	-0.0507806	0.0598876	1.00456	0.950487	1.06172
ieu-b-85.vcf	ebi-a-GCST90001561	CD45RA+ CD8+ T cell %CD8+ T cell	id:ebi-a-GCST90001561	90	0.0465868	0.0573253	0.418598	-0.0657707	0.158944	1.04769	0.936346	1.17227
ieu-b-85.vcf	ebi-a-GCST90001561	CD45RA+ CD8+ T cell %CD8+ T cell	id:ebi-a-GCST90001561	90	-0.0132221	0.0444285	0.766006	-0.100302	0.0738578	0.986865	0.904564	1.07665
ieu-b-85.vcf	ebi-a-GCST90001561	CD45RA+ CD8+ T cell %CD8+ T cell	id:ebi-a-GCST90001561	90	0.086168	0.0653882	0.190956	-0.0419929	0.214329	1.08999	0.958877	1.23903
ieu-b-85.vcf	ebi-a-GCST90001903	CD86 on myeloid Dendritic Cell	id:ebi-a-GCST90001903	91	0.0171058	0.0366474	0.640667	-0.0547231	0.0889346	1.01725	0.946747	1.09301
ieu-b-85.vcf	ebi-a-GCST90001903	CD86 on myeloid Dendritic Cell	id:ebi-a-GCST90001903	91	0.0187345	0.0734799	0.799342	-0.125286	0.162755	1.01891	0.882244	1.17675
ieu-b-85.vcf	ebi-a-GCST90001903	CD86 on myeloid Dendritic Cell	id:ebi-a-GCST90001903	91	-0.0234934	0.0552069	0.670435	-0.131699	0.0847122	0.97678	0.876605	1.0884
ieu-b-85.vcf	ebi-a-GCST90001903	CD86 on myeloid Dendritic Cell	id:ebi-a-GCST90001903	91	-0.0389671	0.0823305	0.637145	-0.200335	0.122401	0.961782	0.818457	1.13021
ieu-b-85.vcf	ebi-a-GCST90002089	CD11c on monocyte	id:ebi-a-GCST90002089	80	-0.0237081	0.0382574	0.535454	-0.0986925	0.0512763	0.976571	0.906021	1.05261
ieu-b-85.vcf	ebi-a-GCST90002089	CD11c on monocyte	id:ebi-a-GCST90002089	80	-0.0373821	0.0776644	0.631631	-0.189604	0.11484	0.963308	0.827286	1.12169
ieu-b-85.vcf	ebi-a-GCST90002089	CD11c on monocyte	id:ebi-a-GCST90002089	80	-0.0559756	0.0585317	0.338905	-0.170698	0.0587465	0.945562	0.843076	1.06051
ieu-b-85.vcf	ebi-a-GCST90002089	CD11c on monocyte	id:ebi-a-GCST90002089	80	-0.0612768	0.0753961	0.418814	-0.209053	0.0864995	0.940563	0.811352	1.09035
ieu-b-85.vcf	ebi-a-GCST90001617	TCRgd T cell %lymphocyte	id:ebi-a-GCST90001617	93	-0.0656878	0.0323873	0.0425399	-0.129167	-0.00220881	0.936423	0.878827	0.997794
ieu-b-85.vcf	ebi-a-GCST90001617	TCRgd T cell %lymphocyte	id:ebi-a-GCST90001617	93	-0.117376	0.0659711	0.0785453	-0.246679	0.0119273	0.889251	0.781391	1.012
ieu-b-85.vcf	ebi-a-GCST90001617	TCRgd T cell %lymphocyte	id:ebi-a-GCST90001617	93	-0.0634908	0.0483194	0.188852	-0.158197	0.0312152	0.938483	0.853682	1.03171
ieu-b-85.vcf	ebi-a-GCST90001617	TCRgd T cell %lymphocyte	id:ebi-a-GCST90001617	93	0.0200611	0.0774532	0.796207	-0.131747	0.171869	1.02026	0.876563	1.18752
ieu-b-85.vcf	ebi-a-GCST90001932	CD127 on CD45RA+ CD4+ T cell	id:ebi-a-GCST90001932	90	-0.0431836	0.0359361	0.229489	-0.113618	0.0272513	0.957736	0.892599	1.02763
ieu-b-85.vcf	ebi-a-GCST90001932	CD127 on CD45RA+ CD4+ T cell	id:ebi-a-GCST90001932	90	-0.00566889	0.0741591	0.939241	-0.151021	0.139683	0.994347	0.85983	1.14991
ieu-b-85.vcf	ebi-a-GCST90001932	CD127 on CD45RA+ CD4+ T cell	id:ebi-a-GCST90001932	90	-0.0616683	0.054716	0.259716	-0.168912	0.045575	0.940195	0.844584	1.04663
ieu-b-85.vcf	ebi-a-GCST90001932	CD127 on CD45RA+ CD4+ T cell	id:ebi-a-GCST90001932	90	-0.0890541	0.0759964	0.244396	-0.238007	0.0598987	0.914796	0.788197	1.06173
ieu-b-85.vcf	ebi-a-GCST90001464	CD86+ myeloid Dendritic Cell Absolute Count	id:ebi-a-GCST90001464	98	0.0010477	0.0339732	0.975398	-0.0655398	0.0676352	1.00105	0.936562	1.06997
ieu-b-85.vcf	ebi-a-GCST90001464	CD86+ myeloid Dendritic Cell Absolute Count	id:ebi-a-GCST90001464	98	-0.0145515	0.0675863	0.829989	-0.147021	0.117918	0.985554	0.863276	1.12515
ieu-b-85.vcf	ebi-a-GCST90001464	CD86+ myeloid Dendritic Cell Absolute Count	id:ebi-a-GCST90001464	98	0.00645919	0.0501572	0.897533	-0.0918489	0.104767	1.00648	0.912243	1.11045
ieu-b-85.vcf	ebi-a-GCST90001464	CD86+ myeloid Dendritic Cell Absolute Count	id:ebi-a-GCST90001464	98	0.0113848	0.0691774	0.869622	-0.124203	0.146973	1.01145	0.883201	1.15832
ieu-b-85.vcf	ebi-a-GCST90001402	Switched memory B cell %B cell	id:ebi-a-GCST90001402	92	0.0383375	0.0328817	0.243646	-0.0261106	0.102786	1.03908	0.974227	1.10825
ieu-b-85.vcf	ebi-a-GCST90001402	Switched memory B cell %B cell	id:ebi-a-GCST90001402	92	0.051608	0.0661188	0.437124	-0.0779848	0.181201	1.05296	0.924979	1.19866
ieu-b-85.vcf	ebi-a-GCST90001402	Switched memory B cell %B cell	id:ebi-a-GCST90001402	92	0.00579937	0.0492357	0.906236	-0.0907026	0.102301	1.00582	0.913289	1.10772
ieu-b-85.vcf	ebi-a-GCST90001402	Switched memory B cell %B cell	id:ebi-a-GCST90001402	92	0.174369	0.071689	0.0169604	0.0338585	0.314879	1.19049	1.03444	1.37009
ieu-b-85.vcf	ebi-a-GCST90001589	CD4+/CD8+ T cell	id:ebi-a-GCST90001589	101	-0.0105076	0.0318306	0.741318	-0.0728956	0.0518805	0.989547	0.929698	1.05325
ieu-b-85.vcf	ebi-a-GCST90001589	CD4+/CD8+ T cell	id:ebi-a-GCST90001589	101	0.0115868	0.0631574	0.854813	-0.112202	0.135375	1.01165	0.893864	1.14497
ieu-b-85.vcf	ebi-a-GCST90001589	CD4+/CD8+ T cell	id:ebi-a-GCST90001589	101	0.0238155	0.0501996	0.635204	-0.0745758	0.122207	1.0241	0.928137	1.12999
ieu-b-85.vcf	ebi-a-GCST90001589	CD4+/CD8+ T cell	id:ebi-a-GCST90001589	101	0.0769937	0.0730624	0.294511	-0.0662086	0.220196	1.08004	0.935936	1.24632
ieu-b-85.vcf	ebi-a-GCST90001882	HVEM on Central Memory CD8+ T cell	id:ebi-a-GCST90001882	65	0.00482972	0.0613461	0.937248	-0.115409	0.125068	1.00484	0.891002	1.13323
ieu-b-85.vcf	ebi-a-GCST90001882	HVEM on Central Memory CD8+ T cell	id:ebi-a-GCST90001882	65	-0.00513166	0.124603	0.967279	-0.249354	0.239091	0.994881	0.779304	1.27009
ieu-b-85.vcf	ebi-a-GCST90001882	HVEM on Central Memory CD8+ T cell	id:ebi-a-GCST90001882	65	-0.00725401	0.0945216	0.938827	-0.192516	0.178008	0.992772	0.824881	1.19484
ieu-b-85.vcf	ebi-a-GCST90001882	HVEM on Central Memory CD8+ T cell	id:ebi-a-GCST90001882	65	-0.251754	0.14002	0.0768956	-0.526193	0.0226848	0.777436	0.59085	1.02294
ieu-b-85.vcf	ebi-a-GCST90002036	CD80 on CD62L+ myeloid Dendritic Cell	id:ebi-a-GCST90002036	93	0.0199093	0.0358893	0.57907	-0.0504336	0.0902523	1.02011	0.950817	1.09445
ieu-b-85.vcf	ebi-a-GCST90002036	CD80 on CD62L+ myeloid Dendritic Cell	id:ebi-a-GCST90002036	93	-0.0117941	0.073234	0.872413	-0.155333	0.131744	0.988275	0.85613	1.14082
ieu-b-85.vcf	ebi-a-GCST90002036	CD80 on CD62L+ myeloid Dendritic Cell	id:ebi-a-GCST90002036	93	-0.00822876	0.0564172	0.884035	-0.118807	0.102349	0.991805	0.88798	1.10777
ieu-b-85.vcf	ebi-a-GCST90002036	CD80 on CD62L+ myeloid Dendritic Cell	id:ebi-a-GCST90002036	93	-0.0407203	0.0836565	0.627589	-0.204687	0.123246	0.960098	0.814902	1.13116
ieu-b-85.vcf	ebi-a-GCST90001667	CD28+ CD45RA- CD8dim T cell %T cell	id:ebi-a-GCST90001667	95	-0.0224843	0.0309402	0.46741	-0.0831272	0.0381586	0.977767	0.920234	1.0389
ieu-b-85.vcf	ebi-a-GCST90001667	CD28+ CD45RA- CD8dim T cell %T cell	id:ebi-a-GCST90001667	95	-0.0161512	0.0614106	0.793129	-0.136516	0.104213	0.983978	0.872392	1.10984
ieu-b-85.vcf	ebi-a-GCST90001667	CD28+ CD45RA- CD8dim T cell %T cell	id:ebi-a-GCST90001667	95	-0.012334	0.044581	0.782037	-0.0997128	0.0750448	0.987742	0.905097	1.07793
ieu-b-85.vcf	ebi-a-GCST90001667	CD28+ CD45RA- CD8dim T cell %T cell	id:ebi-a-GCST90001667	95	0.00685506	0.0595704	0.908631	-0.109903	0.123613	1.00688	0.895921	1.13158
ieu-b-85.vcf	ebi-a-GCST90002020	CD14 on CD33+ HLA DR+ CD14dim	id:ebi-a-GCST90002020	68	0.0507979	0.0508045	0.317373	-0.0487788	0.150375	1.05211	0.952392	1.16227
ieu-b-85.vcf	ebi-a-GCST90002020	CD14 on CD33+ HLA DR+ CD14dim	id:ebi-a-GCST90002020	68	-0.0116199	0.101839	0.909505	-0.211225	0.187985	0.988447	0.809592	1.20682
ieu-b-85.vcf	ebi-a-GCST90002020	CD14 on CD33+ HLA DR+ CD14dim	id:ebi-a-GCST90002020	68	0.0572005	0.0741427	0.440416	-0.0881193	0.20252	1.05887	0.915652	1.22448
ieu-b-85.vcf	ebi-a-GCST90002020	CD14 on CD33+ HLA DR+ CD14dim	id:ebi-a-GCST90002020	68	0.16532	0.110981	0.141015	-0.0522022	0.382842	1.17977	0.949137	1.46645
ieu-b-85.vcf	ebi-a-GCST90002104	HLA DR on myeloid Dendritic Cell	id:ebi-a-GCST90002104	94	-0.0452116	0.0364506	0.214844	-0.116655	0.0262315	0.955795	0.889892	1.02658
ieu-b-85.vcf	ebi-a-GCST90002104	HLA DR on myeloid Dendritic Cell	id:ebi-a-GCST90002104	94	-0.0944021	0.0727836	0.197866	-0.237058	0.0482538	0.909917	0.788946	1.04944
ieu-b-85.vcf	ebi-a-GCST90002104	HLA DR on myeloid Dendritic Cell	id:ebi-a-GCST90002104	94	-0.0497654	0.0518498	0.337156	-0.151391	0.0518602	0.951453	0.859512	1.05323
ieu-b-85.vcf	ebi-a-GCST90002104	HLA DR on myeloid Dendritic Cell	id:ebi-a-GCST90002104	94	-0.0359072	0.0671834	0.594294	-0.167587	0.0957722	0.96473	0.845703	1.10051
ieu-b-85.vcf	ebi-a-GCST90001652	Granulocyte %leukocyte	id:ebi-a-GCST90001652	93	0.0187342	0.0327421	0.567203	-0.0454402	0.0829087	1.01891	0.955577	1.08644
ieu-b-85.vcf	ebi-a-GCST90001652	Granulocyte %leukocyte	id:ebi-a-GCST90001652	93	0.0384591	0.0652594	0.557103	-0.0894494	0.166368	1.03921	0.914435	1.18101
ieu-b-85.vcf	ebi-a-GCST90001652	Granulocyte %leukocyte	id:ebi-a-GCST90001652	93	0.0883447	0.0505442	0.0804869	-0.0107221	0.187411	1.09236	0.989335	1.20612
ieu-b-85.vcf	ebi-a-GCST90001652	Granulocyte %leukocyte	id:ebi-a-GCST90001652	93	0.117481	0.0701876	0.0975641	-0.0200868	0.255049	1.12466	0.980114	1.29052
ieu-b-85.vcf	ebi-a-GCST90002088	CD11c on CD62L+ myeloid Dendritic Cell	id:ebi-a-GCST90002088	82	-0.030352	0.0379643	0.424008	-0.104762	0.044058	0.970104	0.900539	1.04504
ieu-b-85.vcf	ebi-a-GCST90002088	CD11c on CD62L+ myeloid Dendritic Cell	id:ebi-a-GCST90002088	82	-0.000480902	0.0764134	0.994994	-0.150251	0.149289	0.999519	0.860492	1.16101
ieu-b-85.vcf	ebi-a-GCST90002088	CD11c on CD62L+ myeloid Dendritic Cell	id:ebi-a-GCST90002088	82	-0.0447755	0.0600426	0.455831	-0.162459	0.072908	0.956212	0.850051	1.07563
ieu-b-85.vcf	ebi-a-GCST90002088	CD11c on CD62L+ myeloid Dendritic Cell	id:ebi-a-GCST90002088	82	0.027376	0.098704	0.782215	-0.166084	0.220836	1.02775	0.846975	1.24712
ieu-b-85.vcf	ebi-a-GCST90001892	CD28 on CD39+ CD4+ T cell	id:ebi-a-GCST90001892	87	0.00810199	0.0359383	0.821636	-0.062337	0.078541	1.00813	0.939566	1.08171
ieu-b-85.vcf	ebi-a-GCST90001892	CD28 on CD39+ CD4+ T cell	id:ebi-a-GCST90001892	87	0.021625	0.0718359	0.764124	-0.119173	0.162423	1.02186	0.887654	1.17636
ieu-b-85.vcf	ebi-a-GCST90001892	CD28 on CD39+ CD4+ T cell	id:ebi-a-GCST90001892	87	0.0234964	0.0552006	0.67036	-0.0846967	0.131689	1.02377	0.918791	1.14075
ieu-b-85.vcf	ebi-a-GCST90001892	CD28 on CD39+ CD4+ T cell	id:ebi-a-GCST90001892	87	0.124401	0.0916602	0.178271	-0.0552532	0.304055	1.13247	0.946245	1.35534
ieu-b-85.vcf	ebi-a-GCST90001533	Basophil %CD33dim HLA DR- CD66b-	id:ebi-a-GCST90001533	80	0.0257471	0.0447883	0.565385	-0.062038	0.113532	1.02608	0.939847	1.12023
ieu-b-85.vcf	ebi-a-GCST90001533	Basophil %CD33dim HLA DR- CD66b-	id:ebi-a-GCST90001533	80	0.0346674	0.0895921	0.699849	-0.140933	0.210268	1.03528	0.868547	1.23401
ieu-b-85.vcf	ebi-a-GCST90001533	Basophil %CD33dim HLA DR- CD66b-	id:ebi-a-GCST90001533	80	0.0562079	0.0660117	0.394501	-0.0731751	0.185591	1.05782	0.929438	1.20393
ieu-b-85.vcf	ebi-a-GCST90001533	Basophil %CD33dim HLA DR- CD66b-	id:ebi-a-GCST90001533	80	0.0643525	0.0768342	0.40481	-0.0862426	0.214948	1.06647	0.917372	1.2398
ieu-b-85.vcf	ebi-a-GCST90001539	Central Memory CD4+ T cell %T cell	id:ebi-a-GCST90001539	83	-0.000712498	0.0350504	0.983782	-0.0694112	0.0679862	0.999288	0.932943	1.07035
ieu-b-85.vcf	ebi-a-GCST90001539	Central Memory CD4+ T cell %T cell	id:ebi-a-GCST90001539	83	0.00858875	0.0708733	0.903845	-0.130323	0.1475	1.00863	0.877812	1.15893
ieu-b-85.vcf	ebi-a-GCST90001539	Central Memory CD4+ T cell %T cell	id:ebi-a-GCST90001539	83	0.0202993	0.0540625	0.707305	-0.0856632	0.126262	1.02051	0.917903	1.13458
ieu-b-85.vcf	ebi-a-GCST90001539	Central Memory CD4+ T cell %T cell	id:ebi-a-GCST90001539	83	0.0530225	0.0873182	0.545374	-0.118121	0.224166	1.05445	0.888588	1.25128
ieu-b-85.vcf	ebi-a-GCST90001862	CD3 on CD28+ CD4-CD8- T cell	id:ebi-a-GCST90001862	88	-0.0208882	0.035754	0.559072	-0.090966	0.0491896	0.979328	0.913049	1.05042
ieu-b-85.vcf	ebi-a-GCST90001862	CD3 on CD28+ CD4-CD8- T cell	id:ebi-a-GCST90001862	88	-0.0400278	0.0729011	0.584381	-0.182914	0.102858	0.960763	0.83284	1.10833
ieu-b-85.vcf	ebi-a-GCST90001862	CD3 on CD28+ CD4-CD8- T cell	id:ebi-a-GCST90001862	88	-0.0410301	0.0522762	0.432529	-0.143491	0.0614312	0.9598	0.866328	1.06336
ieu-b-85.vcf	ebi-a-GCST90001862	CD3 on CD28+ CD4-CD8- T cell	id:ebi-a-GCST90001862	88	-0.087567	0.072563	0.230791	-0.22979	0.0546564	0.916157	0.7947	1.05618
ieu-b-85.vcf	ebi-a-GCST90001581	CD14- CD16- Absolute Count	id:ebi-a-GCST90001581	104	-0.0230851	0.0314244	0.462569	-0.0846768	0.0385067	0.977179	0.918809	1.03926
ieu-b-85.vcf	ebi-a-GCST90001581	CD14- CD16- Absolute Count	id:ebi-a-GCST90001581	104	0.0289595	0.0629193	0.646306	-0.0943623	0.152281	1.02938	0.909953	1.16449
ieu-b-85.vcf	ebi-a-GCST90001581	CD14- CD16- Absolute Count	id:ebi-a-GCST90001581	104	-0.0474238	0.0477819	0.320951	-0.141076	0.0462287	0.953683	0.868423	1.04731
ieu-b-85.vcf	ebi-a-GCST90001581	CD14- CD16- Absolute Count	id:ebi-a-GCST90001581	104	-0.0612228	0.0602516	0.311953	-0.179316	0.0568703	0.940614	0.835842	1.05852
ieu-b-85.vcf	ebi-a-GCST90001749	CD20 on IgD+ CD38- naive B cell	id:ebi-a-GCST90001749	93	-0.0329042	0.0447794	0.462458	-0.120672	0.0548635	0.967631	0.886325	1.0564
ieu-b-85.vcf	ebi-a-GCST90001749	CD20 on IgD+ CD38- naive B cell	id:ebi-a-GCST90001749	93	-0.0642297	0.0914291	0.484155	-0.243431	0.114971	0.93779	0.783934	1.12184
ieu-b-85.vcf	ebi-a-GCST90001749	CD20 on IgD+ CD38- naive B cell	id:ebi-a-GCST90001749	93	-0.042197	0.0652765	0.517997	-0.170139	0.0857448	0.958681	0.843548	1.08953
ieu-b-85.vcf	ebi-a-GCST90001749	CD20 on IgD+ CD38- naive B cell	id:ebi-a-GCST90001749	93	-0.100599	0.0987849	0.311176	-0.294217	0.0930195	0.904296	0.745114	1.09748
ieu-b-85.vcf	ebi-a-GCST90001822	IgD on IgD+ CD38- B cell	id:ebi-a-GCST90001822	94	-0.0275796	0.0325144	0.396311	-0.0913078	0.0361485	0.972797	0.912737	1.03681
ieu-b-85.vcf	ebi-a-GCST90001822	IgD on IgD+ CD38- B cell	id:ebi-a-GCST90001822	94	-0.118711	0.0662754	0.0765528	-0.248611	0.0111886	0.888064	0.779883	1.01125
ieu-b-85.vcf	ebi-a-GCST90001822	IgD on IgD+ CD38- B cell	id:ebi-a-GCST90001822	94	-0.036864	0.0546324	0.499826	-0.143943	0.0702155	0.963807	0.865937	1.07274
ieu-b-85.vcf	ebi-a-GCST90001822	IgD on IgD+ CD38- B cell	id:ebi-a-GCST90001822	94	0.00453268	0.0988647	0.96353	-0.189242	0.198307	1.00454	0.827586	1.21934
ieu-b-85.vcf	ebi-a-GCST90001449	CD11c+ monocyte %monocyte	id:ebi-a-GCST90001449	85	-0.0691458	0.0358239	0.053587	-0.139361	0.00106897	0.933191	0.869914	1.00107
ieu-b-85.vcf	ebi-a-GCST90001449	CD11c+ monocyte %monocyte	id:ebi-a-GCST90001449	85	-0.110529	0.0731064	0.134359	-0.253818	0.0327594	0.89536	0.775833	1.0333
ieu-b-85.vcf	ebi-a-GCST90001449	CD11c+ monocyte %monocyte	id:ebi-a-GCST90001449	85	-0.104501	0.0517461	0.0434366	-0.205923	-0.00307825	0.900774	0.813896	0.996926
ieu-b-85.vcf	ebi-a-GCST90001449	CD11c+ monocyte %monocyte	id:ebi-a-GCST90001449	85	-0.11126	0.0615704	0.074337	-0.231938	0.00941801	0.894706	0.792995	1.00946
ieu-b-85.vcf	ebi-a-GCST90001695	CD45RA- CD28- CD8+ T cell Absolute Count	id:ebi-a-GCST90001695	86	-1.48129	3.57106	0.678286	-8.48056	5.51799	0.227345	0.000207463	249.133
ieu-b-85.vcf	ebi-a-GCST90001695	CD45RA- CD28- CD8+ T cell Absolute Count	id:ebi-a-GCST90001695	86	-6.67611	7.31604	0.364101	-21.0156	7.66333	0.00126067	7.47e-10	2128.84
ieu-b-85.vcf	ebi-a-GCST90001695	CD45RA- CD28- CD8+ T cell Absolute Count	id:ebi-a-GCST90001695	86	-5.13734	5.09466	0.313273	-15.1229	4.84819	0.00587328	2.71e-07	127.509
ieu-b-85.vcf	ebi-a-GCST90001695	CD45RA- CD28- CD8+ T cell Absolute Count	id:ebi-a-GCST90001695	86	-5.34672	7.2046	0.460057	-19.4677	8.77429	0.00476373	3.51e-09	6465.88
ieu-b-85.vcf	ebi-a-GCST90001950	CD33 on Granulocytic Myeloid-Derived Suppressor Cells	id:ebi-a-GCST90001950	63	-0.0181491	0.0580956	0.754736	-0.132017	0.0957183	0.982015	0.876326	1.10045
ieu-b-85.vcf	ebi-a-GCST90001950	CD33 on Granulocytic Myeloid-Derived Suppressor Cells	id:ebi-a-GCST90001950	63	-0.0811592	0.114207	0.480022	-0.305006	0.142687	0.922047	0.737119	1.15337
ieu-b-85.vcf	ebi-a-GCST90001950	CD33 on Granulocytic Myeloid-Derived Suppressor Cells	id:ebi-a-GCST90001950	63	-0.0425993	0.0836724	0.610668	-0.206597	0.121399	0.958295	0.813347	1.12907
ieu-b-85.vcf	ebi-a-GCST90001950	CD33 on Granulocytic Myeloid-Derived Suppressor Cells	id:ebi-a-GCST90001950	63	-0.0681071	0.116593	0.561244	-0.29663	0.160416	0.93416	0.743319	1.174
ieu-b-85.vcf	ebi-a-GCST90001527	CD33dim HLA DR+ CD11b- Absolute Count	id:ebi-a-GCST90001527	68	0.0682309	0.0449468	0.129005	-0.0198648	0.156327	1.07061	0.980331	1.16921
ieu-b-85.vcf	ebi-a-GCST90001527	CD33dim HLA DR+ CD11b- Absolute Count	id:ebi-a-GCST90001527	68	0.0345051	0.0883941	0.697531	-0.138747	0.207757	1.03511	0.870448	1.23091
ieu-b-85.vcf	ebi-a-GCST90001527	CD33dim HLA DR+ CD11b- Absolute Count	id:ebi-a-GCST90001527	68	0.079182	0.062951	0.208452	-0.044202	0.202566	1.0824	0.956761	1.22454
ieu-b-85.vcf	ebi-a-GCST90001527	CD33dim HLA DR+ CD11b- Absolute Count	id:ebi-a-GCST90001527	68	0.0332323	0.0799054	0.678816	-0.123382	0.189847	1.03379	0.883926	1.20906
ieu-b-85.vcf	ebi-a-GCST90001650	HLA DR+ Natural Killer %CD3- lymphocyte	id:ebi-a-GCST90001650	84	-0.0509204	0.0332515	0.125677	-0.116093	0.0142525	0.950354	0.890392	1.01435
ieu-b-85.vcf	ebi-a-GCST90001650	HLA DR+ Natural Killer %CD3- lymphocyte	id:ebi-a-GCST90001650	84	-0.10569	0.066269	0.114591	-0.235577	0.0241976	0.899704	0.790115	1.02449
ieu-b-85.vcf	ebi-a-GCST90001650	HLA DR+ Natural Killer %CD3- lymphocyte	id:ebi-a-GCST90001650	84	-0.0797017	0.0486905	0.10165	-0.175135	0.0157316	0.923392	0.839344	1.01586
ieu-b-85.vcf	ebi-a-GCST90001650	HLA DR+ Natural Killer %CD3- lymphocyte	id:ebi-a-GCST90001650	84	-0.0615816	0.0614701	0.319345	-0.182063	0.0588998	0.940276	0.833549	1.06067
ieu-b-85.vcf	ebi-a-GCST90001571	Effector Memory CD4-CD8- T cell %T cell	id:ebi-a-GCST90001571	94	-0.0594622	0.0315743	0.0596668	-0.121348	0.0024234	0.942271	0.885726	1.00243
ieu-b-85.vcf	ebi-a-GCST90001571	Effector Memory CD4-CD8- T cell %T cell	id:ebi-a-GCST90001571	94	-0.116523	0.0625373	0.0656178	-0.239096	0.00605069	0.89001	0.78734	1.00607
ieu-b-85.vcf	ebi-a-GCST90001571	Effector Memory CD4-CD8- T cell %T cell	id:ebi-a-GCST90001571	94	-0.0430851	0.0464916	0.354068	-0.134209	0.0480385	0.95783	0.874408	1.04921
ieu-b-85.vcf	ebi-a-GCST90001571	Effector Memory CD4-CD8- T cell %T cell	id:ebi-a-GCST90001571	94	-0.043844	0.0610617	0.474541	-0.163525	0.075837	0.957103	0.849145	1.07879
ieu-b-85.vcf	ebi-a-GCST90001717	BAFF-R on unswitched memory B cell	id:ebi-a-GCST90001717	95	0.0114361	0.0331981	0.730484	-0.0536321	0.0765043	1.0115	0.947781	1.07951
ieu-b-85.vcf	ebi-a-GCST90001717	BAFF-R on unswitched memory B cell	id:ebi-a-GCST90001717	95	0.019049	0.0677486	0.779204	-0.113738	0.151836	1.01923	0.892491	1.16397
ieu-b-85.vcf	ebi-a-GCST90001717	BAFF-R on unswitched memory B cell	id:ebi-a-GCST90001717	95	0.0121603	0.0520939	0.815427	-0.0899437	0.114264	1.01223	0.913983	1.12105
ieu-b-85.vcf	ebi-a-GCST90001717	BAFF-R on unswitched memory B cell	id:ebi-a-GCST90001717	95	0.0273336	0.0804823	0.734899	-0.130412	0.185079	1.02771	0.877734	1.20331
ieu-b-85.vcf	ebi-a-GCST90001483	CD39+ resting CD4 regulatory T cell Absolute Count	id:ebi-a-GCST90001483	96	-0.0207988	0.032287	0.519455	-0.0840814	0.0424837	0.979416	0.919356	1.0434
ieu-b-85.vcf	ebi-a-GCST90001483	CD39+ resting CD4 regulatory T cell Absolute Count	id:ebi-a-GCST90001483	96	-0.0829318	0.0659453	0.211657	-0.212185	0.0463209	0.920414	0.808815	1.04741
ieu-b-85.vcf	ebi-a-GCST90001483	CD39+ resting CD4 regulatory T cell Absolute Count	id:ebi-a-GCST90001483	96	-0.0470033	0.0495614	0.342933	-0.144144	0.050137	0.954084	0.865763	1.05142
ieu-b-85.vcf	ebi-a-GCST90001483	CD39+ resting CD4 regulatory T cell Absolute Count	id:ebi-a-GCST90001483	96	-0.07106	0.0614705	0.250579	-0.191542	0.0494221	0.931406	0.825685	1.05066
ieu-b-85.vcf	ebi-a-GCST90002017	CCR2 on monocyte	id:ebi-a-GCST90002017	91	-0.0510656	0.0364671	0.161418	-0.122541	0.0204099	0.950216	0.884669	1.02062
ieu-b-85.vcf	ebi-a-GCST90002017	CCR2 on monocyte	id:ebi-a-GCST90002017	91	-0.0978576	0.0734358	0.186078	-0.241792	0.0460765	0.906778	0.78522	1.04715
ieu-b-85.vcf	ebi-a-GCST90002017	CCR2 on monocyte	id:ebi-a-GCST90002017	91	-0.0673697	0.0570087	0.237308	-0.179107	0.0443674	0.93485	0.836017	1.04537
ieu-b-85.vcf	ebi-a-GCST90002017	CCR2 on monocyte	id:ebi-a-GCST90002017	91	-0.0905796	0.0843668	0.285854	-0.255939	0.0747794	0.913402	0.77419	1.07765
ieu-b-85.vcf	ebi-a-GCST90002024	CD4 on naive CD4+ T cell	id:ebi-a-GCST90002024	88	-0.0560782	0.0370182	0.129803	-0.128634	0.0164775	0.945465	0.879296	1.01661
ieu-b-85.vcf	ebi-a-GCST90002024	CD4 on naive CD4+ T cell	id:ebi-a-GCST90002024	88	-0.0577804	0.072456	0.427384	-0.199794	0.0842335	0.943857	0.818899	1.08788
ieu-b-85.vcf	ebi-a-GCST90002024	CD4 on naive CD4+ T cell	id:ebi-a-GCST90002024	88	-0.0858176	0.0572805	0.134082	-0.198087	0.0264522	0.917762	0.820298	1.02681
ieu-b-85.vcf	ebi-a-GCST90002024	CD4 on naive CD4+ T cell	id:ebi-a-GCST90002024	88	-0.112118	0.0764597	0.146152	-0.261979	0.0377426	0.893938	0.769527	1.03846
ieu-b-85.vcf	ebi-a-GCST90001619	HLA DR+ T cell%T cell	id:ebi-a-GCST90001619	101	-0.000664371	0.029152	0.981818	-0.0578024	0.0564736	0.999336	0.943836	1.0581
ieu-b-85.vcf	ebi-a-GCST90001619	HLA DR+ T cell%T cell	id:ebi-a-GCST90001619	101	-0.0157772	0.0600339	0.793247	-0.133444	0.101889	0.984347	0.875077	1.10726
ieu-b-85.vcf	ebi-a-GCST90001619	HLA DR+ T cell%T cell	id:ebi-a-GCST90001619	101	-0.0641727	0.0480058	0.181298	-0.158264	0.0299187	0.937843	0.853624	1.03037
ieu-b-85.vcf	ebi-a-GCST90001619	HLA DR+ T cell%T cell	id:ebi-a-GCST90001619	101	-0.172855	0.085073	0.0448211	-0.339599	-0.00611242	0.841259	0.712056	0.993906
ieu-b-85.vcf	ebi-a-GCST90001495	CD39+ secreting CD4 regulatory T cell Absolute Count	id:ebi-a-GCST90001495	92	0.00417428	0.0338756	0.90193	-0.0622219	0.0705704	1.00418	0.939674	1.07312
ieu-b-85.vcf	ebi-a-GCST90001495	CD39+ secreting CD4 regulatory T cell Absolute Count	id:ebi-a-GCST90001495	92	0.00425099	0.0675021	0.949925	-0.128053	0.136555	1.00426	0.879807	1.14632
ieu-b-85.vcf	ebi-a-GCST90001495	CD39+ secreting CD4 regulatory T cell Absolute Count	id:ebi-a-GCST90001495	92	0.00776544	0.0491215	0.874389	-0.0885128	0.104044	1.0078	0.915291	1.10965
ieu-b-85.vcf	ebi-a-GCST90001495	CD39+ secreting CD4 regulatory T cell Absolute Count	id:ebi-a-GCST90001495	92	0.000305383	0.0743774	0.996733	-0.145474	0.146085	1.00031	0.864612	1.15729
ieu-b-85.vcf	ebi-a-GCST90001817	CD38 on Plasma Blast-Plasma Cell	id:ebi-a-GCST90001817	101	0.0278441	0.0303502	0.358919	-0.0316423	0.0873304	1.02824	0.968853	1.09126
ieu-b-85.vcf	ebi-a-GCST90001817	CD38 on Plasma Blast-Plasma Cell	id:ebi-a-GCST90001817	101	0.0516805	0.0626156	0.411151	-0.0710461	0.174407	1.05304	0.931419	1.19054
ieu-b-85.vcf	ebi-a-GCST90001817	CD38 on Plasma Blast-Plasma Cell	id:ebi-a-GCST90001817	101	0.0753936	0.0433715	0.0821547	-0.00961466	0.160402	1.07831	0.990431	1.17398
ieu-b-85.vcf	ebi-a-GCST90001817	CD38 on Plasma Blast-Plasma Cell	id:ebi-a-GCST90001817	101	0.0920005	0.0655693	0.163683	-0.0365153	0.220516	1.09637	0.964143	1.24672
ieu-b-85.vcf	ebi-a-GCST90001953	CD33 on CD33dim HLA DR-	id:ebi-a-GCST90001953	69	-0.0404027	0.0521976	0.438911	-0.14271	0.0619046	0.960403	0.867005	1.06386
ieu-b-85.vcf	ebi-a-GCST90001953	CD33 on CD33dim HLA DR-	id:ebi-a-GCST90001953	69	-0.108395	0.102114	0.29227	-0.308539	0.0917487	0.897273	0.734519	1.09609
ieu-b-85.vcf	ebi-a-GCST90001953	CD33 on CD33dim HLA DR-	id:ebi-a-GCST90001953	69	-0.0605966	0.0738903	0.412166	-0.205422	0.0842284	0.941203	0.814304	1.08788
ieu-b-85.vcf	ebi-a-GCST90001953	CD33 on CD33dim HLA DR-	id:ebi-a-GCST90001953	69	-0.069963	0.102776	0.498352	-0.271404	0.131478	0.932428	0.762308	1.14051
ieu-b-85.vcf	ebi-a-GCST90001579	CD14- CD16+ monocyte Absolute Count	id:ebi-a-GCST90001579	105	-0.00292583	0.0311392	0.925141	-0.0639587	0.058107	0.997078	0.938044	1.05983
ieu-b-85.vcf	ebi-a-GCST90001579	CD14- CD16+ monocyte Absolute Count	id:ebi-a-GCST90001579	105	0.00291072	0.0632332	0.963374	-0.121026	0.126848	1.00291	0.886011	1.13524
ieu-b-85.vcf	ebi-a-GCST90001579	CD14- CD16+ monocyte Absolute Count	id:ebi-a-GCST90001579	105	-0.0457856	0.0478338	0.338476	-0.13954	0.0479686	0.955247	0.869758	1.04914
ieu-b-85.vcf	ebi-a-GCST90001579	CD14- CD16+ monocyte Absolute Count	id:ebi-a-GCST90001579	105	-0.0834949	0.068118	0.223066	-0.217006	0.0500165	0.919896	0.804925	1.05129
ieu-b-85.vcf	ebi-a-GCST90001447	IgD+ CD38+ B cell %B cell	id:ebi-a-GCST90001447	93	0.00390747	0.0315512	0.901438	-0.0579329	0.0657478	1.00392	0.943713	1.06796
ieu-b-85.vcf	ebi-a-GCST90001447	IgD+ CD38+ B cell %B cell	id:ebi-a-GCST90001447	93	0.0280631	0.06471	0.665551	-0.0987686	0.154895	1.02846	0.905952	1.16754
ieu-b-85.vcf	ebi-a-GCST90001447	IgD+ CD38+ B cell %B cell	id:ebi-a-GCST90001447	93	0.00629286	0.0473193	0.894203	-0.086453	0.0990387	1.00631	0.917179	1.10411
ieu-b-85.vcf	ebi-a-GCST90001447	IgD+ CD38+ B cell %B cell	id:ebi-a-GCST90001447	93	0.00780704	0.0592767	0.895505	-0.108375	0.123989	1.00784	0.897291	1.132
ieu-b-85.vcf	ebi-a-GCST90001709	BAFF-R on IgD+ CD38dim B cell	id:ebi-a-GCST90001709	90	-0.0268596	0.0331923	0.418393	-0.0919166	0.0381973	0.973498	0.912181	1.03894
ieu-b-85.vcf	ebi-a-GCST90001709	BAFF-R on IgD+ CD38dim B cell	id:ebi-a-GCST90001709	90	-0.0122373	0.0669618	0.855414	-0.143482	0.119008	0.987837	0.866336	1.12638
ieu-b-85.vcf	ebi-a-GCST90001709	BAFF-R on IgD+ CD38dim B cell	id:ebi-a-GCST90001709	90	-0.0158738	0.0523697	0.761805	-0.118518	0.0867707	0.984252	0.888236	1.09065
ieu-b-85.vcf	ebi-a-GCST90001709	BAFF-R on IgD+ CD38dim B cell	id:ebi-a-GCST90001709	90	0.0243991	0.0850489	0.774869	-0.142297	0.191095	1.0247	0.867364	1.21057
ieu-b-85.vcf	ebi-a-GCST90002112	HLA DR on CD33- HLA DR+	id:ebi-a-GCST90002112	78	0.00537767	0.0491854	0.912937	-0.0910258	0.101781	1.00539	0.912994	1.10714
ieu-b-85.vcf	ebi-a-GCST90002112	HLA DR on CD33- HLA DR+	id:ebi-a-GCST90002112	78	0.0376484	0.0979772	0.701861	-0.154387	0.229684	1.03837	0.85694	1.2582
ieu-b-85.vcf	ebi-a-GCST90002112	HLA DR on CD33- HLA DR+	id:ebi-a-GCST90002112	78	0.0124151	0.0746395	0.867894	-0.133878	0.158708	1.01249	0.874697	1.172
ieu-b-85.vcf	ebi-a-GCST90002112	HLA DR on CD33- HLA DR+	id:ebi-a-GCST90002112	78	0.0309452	0.106155	0.771445	-0.177118	0.239008	1.03143	0.837681	1.26999
ieu-b-85.vcf	ebi-a-GCST90001730	CD19 on IgD+ CD38dim B cell	id:ebi-a-GCST90001730	91	-0.0144711	0.0322899	0.654036	-0.0777592	0.0488171	0.985633	0.925187	1.05003
ieu-b-85.vcf	ebi-a-GCST90001730	CD19 on IgD+ CD38dim B cell	id:ebi-a-GCST90001730	91	-0.0505934	0.0643791	0.434032	-0.176776	0.0755896	0.950665	0.837967	1.07852
ieu-b-85.vcf	ebi-a-GCST90001730	CD19 on IgD+ CD38dim B cell	id:ebi-a-GCST90001730	91	0.010915	0.0467241	0.815292	-0.0806642	0.102494	1.01097	0.922503	1.10793
ieu-b-85.vcf	ebi-a-GCST90001730	CD19 on IgD+ CD38dim B cell	id:ebi-a-GCST90001730	91	0.0266965	0.0624144	0.66987	-0.0956357	0.149029	1.02706	0.908795	1.16071
ieu-b-85.vcf	ebi-a-GCST90002042	CD45 on CD33+ HLA DR+ CD14-	id:ebi-a-GCST90002042	70	0.0105503	0.0505329	0.834619	-0.0884942	0.109595	1.01061	0.915308	1.11583
ieu-b-85.vcf	ebi-a-GCST90002042	CD45 on CD33+ HLA DR+ CD14-	id:ebi-a-GCST90002042	70	-0.0280257	0.102494	0.785347	-0.228915	0.172863	0.972363	0.795396	1.1887
ieu-b-85.vcf	ebi-a-GCST90002042	CD45 on CD33+ HLA DR+ CD14-	id:ebi-a-GCST90002042	70	0.0378193	0.0764067	0.620618	-0.111938	0.187576	1.03854	0.8941	1.20632
ieu-b-85.vcf	ebi-a-GCST90002042	CD45 on CD33+ HLA DR+ CD14-	id:ebi-a-GCST90002042	70	0.0704593	0.126302	0.578744	-0.177093	0.318012	1.073	0.837702	1.37439
ieu-b-85.vcf	ebi-a-GCST90002038	CD80 on CD62L+ plasmacytoid Dendritic Cell	id:ebi-a-GCST90002038	88	0.0236164	0.0368771	0.521908	-0.0486628	0.0958956	1.0239	0.952502	1.10064
ieu-b-85.vcf	ebi-a-GCST90002038	CD80 on CD62L+ plasmacytoid Dendritic Cell	id:ebi-a-GCST90002038	88	0.0604488	0.0757461	0.427043	-0.0880135	0.208911	1.06231	0.915748	1.23234
ieu-b-85.vcf	ebi-a-GCST90002038	CD80 on CD62L+ plasmacytoid Dendritic Cell	id:ebi-a-GCST90002038	88	0.0159165	0.0534569	0.765899	-0.088859	0.120692	1.01604	0.914975	1.12828
ieu-b-85.vcf	ebi-a-GCST90002038	CD80 on CD62L+ plasmacytoid Dendritic Cell	id:ebi-a-GCST90002038	88	0.0319623	0.0712657	0.654912	-0.107719	0.171643	1.03248	0.89788	1.18725
ieu-b-85.vcf	ebi-a-GCST90001746	CD20 on IgD+ CD24+ B cell	id:ebi-a-GCST90001746	95	0.0241399	0.0317938	0.447694	-0.0381759	0.0864556	1.02443	0.962544	1.0903
ieu-b-85.vcf	ebi-a-GCST90001746	CD20 on IgD+ CD24+ B cell	id:ebi-a-GCST90001746	95	0.0387263	0.0647254	0.551083	-0.0881355	0.165588	1.03949	0.915637	1.18009
ieu-b-85.vcf	ebi-a-GCST90001746	CD20 on IgD+ CD24+ B cell	id:ebi-a-GCST90001746	95	0.0143997	0.0465352	0.756989	-0.0768093	0.105609	1.0145	0.926066	1.11139
ieu-b-85.vcf	ebi-a-GCST90001746	CD20 on IgD+ CD24+ B cell	id:ebi-a-GCST90001746	95	0.00755447	0.0714175	0.915983	-0.132424	0.147533	1.00758	0.87597	1.15897
ieu-b-85.vcf	ebi-a-GCST90001771	CD24 on memory B cell	id:ebi-a-GCST90001771	87	0.0339641	0.0324818	0.295729	-0.0297002	0.0976284	1.03455	0.970737	1.10255
ieu-b-85.vcf	ebi-a-GCST90001771	CD24 on memory B cell	id:ebi-a-GCST90001771	87	0.000533759	0.0652247	0.99349	-0.127307	0.128374	1.00053	0.880464	1.13698
ieu-b-85.vcf	ebi-a-GCST90001771	CD24 on memory B cell	id:ebi-a-GCST90001771	87	0.067753	0.0499922	0.175331	-0.0302316	0.165738	1.0701	0.970221	1.18026
ieu-b-85.vcf	ebi-a-GCST90001771	CD24 on memory B cell	id:ebi-a-GCST90001771	87	0.0688908	0.0603141	0.256541	-0.0493248	0.187106	1.07132	0.951872	1.20576
ieu-b-85.vcf	ebi-a-GCST90001806	CD27 on unswitched memory B cell	id:ebi-a-GCST90001806	95	0.0181099	0.0322869	0.574863	-0.0451724	0.0813922	1.01827	0.955833	1.0848
ieu-b-85.vcf	ebi-a-GCST90001806	CD27 on unswitched memory B cell	id:ebi-a-GCST90001806	95	-0.0126918	0.0648014	0.84515	-0.139703	0.114319	0.987388	0.869617	1.12111
ieu-b-85.vcf	ebi-a-GCST90001806	CD27 on unswitched memory B cell	id:ebi-a-GCST90001806	95	0.0477608	0.0483109	0.322853	-0.0469287	0.14245	1.04892	0.954155	1.1531
ieu-b-85.vcf	ebi-a-GCST90001806	CD27 on unswitched memory B cell	id:ebi-a-GCST90001806	95	0.0726399	0.0649615	0.266332	-0.0546848	0.199964	1.07534	0.946784	1.22136
ieu-b-85.vcf	ebi-a-GCST90002100	CD45RA on naive CD8+ T cell	id:ebi-a-GCST90002100	91	-0.0080955	0.0350442	0.817308	-0.0767822	0.0605912	0.991937	0.926092	1.06246
ieu-b-85.vcf	ebi-a-GCST90002100	CD45RA on naive CD8+ T cell	id:ebi-a-GCST90002100	91	-0.0639827	0.0706723	0.367728	-0.202501	0.0745351	0.938021	0.816686	1.07738
ieu-b-85.vcf	ebi-a-GCST90002100	CD45RA on naive CD8+ T cell	id:ebi-a-GCST90002100	91	0.000918383	0.0517362	0.985837	-0.100485	0.102321	1.00092	0.904399	1.10774
ieu-b-85.vcf	ebi-a-GCST90002100	CD45RA on naive CD8+ T cell	id:ebi-a-GCST90002100	91	0.0134542	0.0713619	0.850882	-0.126415	0.153324	1.01355	0.881249	1.1657
ieu-b-85.vcf	ebi-a-GCST90001768	CD24 on IgD+ CD38+ B cell	id:ebi-a-GCST90001768	91	0.00241804	0.0324246	0.940554	-0.0611343	0.0659703	1.00242	0.940697	1.0682
ieu-b-85.vcf	ebi-a-GCST90001768	CD24 on IgD+ CD38+ B cell	id:ebi-a-GCST90001768	91	-0.0387034	0.0653288	0.555058	-0.166748	0.089341	0.962036	0.846413	1.09345
ieu-b-85.vcf	ebi-a-GCST90001768	CD24 on IgD+ CD38+ B cell	id:ebi-a-GCST90001768	91	-0.0120781	0.0492804	0.806388	-0.108668	0.0845115	0.987995	0.897029	1.08819
ieu-b-85.vcf	ebi-a-GCST90001768	CD24 on IgD+ CD38+ B cell	id:ebi-a-GCST90001768	91	0.0160821	0.0749142	0.830507	-0.13075	0.162914	1.01621	0.877437	1.17694
ieu-b-85.vcf	ebi-a-GCST90001858	CD3 on CD45RA+ CD4+ T cell	id:ebi-a-GCST90001858	87	0.0329488	0.03624	0.363253	-0.0380816	0.103979	1.0335	0.962634	1.10958
ieu-b-85.vcf	ebi-a-GCST90001858	CD3 on CD45RA+ CD4+ T cell	id:ebi-a-GCST90001858	87	0.116495	0.071451	0.106714	-0.0235492	0.256539	1.12355	0.976726	1.29245
ieu-b-85.vcf	ebi-a-GCST90001858	CD3 on CD45RA+ CD4+ T cell	id:ebi-a-GCST90001858	87	0.0395935	0.0549344	0.471069	-0.068078	0.147265	1.04039	0.934188	1.15866
ieu-b-85.vcf	ebi-a-GCST90001858	CD3 on CD45RA+ CD4+ T cell	id:ebi-a-GCST90001858	87	0.0265467	0.0739804	0.720599	-0.118455	0.171548	1.0269	0.888292	1.18714
ieu-b-85.vcf	ebi-a-GCST90001555	Effector Memory CD8+ T cell %CD8+ T cell	id:ebi-a-GCST90001555	96	-0.017614	0.0277844	0.526111	-0.0720713	0.0368433	0.98254	0.930465	1.03753
ieu-b-85.vcf	ebi-a-GCST90001555	Effector Memory CD8+ T cell %CD8+ T cell	id:ebi-a-GCST90001555	96	-0.0380131	0.0559429	0.498491	-0.147661	0.0716349	0.9627	0.862723	1.07426
ieu-b-85.vcf	ebi-a-GCST90001555	Effector Memory CD8+ T cell %CD8+ T cell	id:ebi-a-GCST90001555	96	-0.00220696	0.0437944	0.959809	-0.0880439	0.08363	0.997795	0.915721	1.08723
ieu-b-85.vcf	ebi-a-GCST90001555	Effector Memory CD8+ T cell %CD8+ T cell	id:ebi-a-GCST90001555	96	-0.00723312	0.0637999	0.909975	-0.132281	0.117815	0.992793	0.876095	1.12504
ieu-b-85.vcf	ebi-a-GCST90001716	BAFF-R on naive-mature B cell	id:ebi-a-GCST90001716	92	-0.0433336	0.0331218	0.190769	-0.108252	0.0215852	0.957592	0.897401	1.02182
ieu-b-85.vcf	ebi-a-GCST90001716	BAFF-R on naive-mature B cell	id:ebi-a-GCST90001716	92	-0.0277952	0.0662435	0.675784	-0.157632	0.102042	0.972588	0.854164	1.10743
ieu-b-85.vcf	ebi-a-GCST90001716	BAFF-R on naive-mature B cell	id:ebi-a-GCST90001716	92	-0.0287008	0.0505668	0.570318	-0.127812	0.0704101	0.971707	0.880019	1.07295
ieu-b-85.vcf	ebi-a-GCST90001716	BAFF-R on naive-mature B cell	id:ebi-a-GCST90001716	92	0.0327658	0.0801063	0.683479	-0.124242	0.189774	1.03331	0.883166	1.20898
ieu-b-85.vcf	ebi-a-GCST90001411	IgD+ CD24+ B cell %B cell	id:ebi-a-GCST90001411	90	0.0037818	0.0334564	0.910001	-0.0617927	0.0693563	1.00379	0.940078	1.07182
ieu-b-85.vcf	ebi-a-GCST90001411	IgD+ CD24+ B cell %B cell	id:ebi-a-GCST90001411	90	0.0103833	0.0673481	0.877826	-0.121619	0.142386	1.01044	0.885486	1.15302
ieu-b-85.vcf	ebi-a-GCST90001411	IgD+ CD24+ B cell %B cell	id:ebi-a-GCST90001411	90	-0.00156439	0.0501935	0.975136	-0.0999437	0.0968149	0.998437	0.904888	1.10166
ieu-b-85.vcf	ebi-a-GCST90001411	IgD+ CD24+ B cell %B cell	id:ebi-a-GCST90001411	90	0.0154958	0.0679788	0.820208	-0.117743	0.148734	1.01562	0.888925	1.16036
ieu-b-85.vcf	ebi-a-GCST90001646	Natural Killer %CD3- lymphocyte	id:ebi-a-GCST90001646	97	-0.0437036	0.0306487	0.153882	-0.103775	0.0163678	0.957238	0.901428	1.0165
ieu-b-85.vcf	ebi-a-GCST90001646	Natural Killer %CD3- lymphocyte	id:ebi-a-GCST90001646	97	-0.0534016	0.0623898	0.394187	-0.175686	0.0688823	0.947999	0.838882	1.07131
ieu-b-85.vcf	ebi-a-GCST90001646	Natural Killer %CD3- lymphocyte	id:ebi-a-GCST90001646	97	-0.0517498	0.0504077	0.304597	-0.150549	0.0470492	0.949566	0.860236	1.04817
ieu-b-85.vcf	ebi-a-GCST90001646	Natural Killer %CD3- lymphocyte	id:ebi-a-GCST90001646	97	0.0696206	0.104966	0.50875	-0.136114	0.275355	1.0721	0.872743	1.317
ieu-b-85.vcf	ebi-a-GCST90001542	Effector Memory CD4+ T cell Absolute Count	id:ebi-a-GCST90001542	101	-0.0259215	0.0327086	0.42807	-0.0900304	0.0381873	0.974412	0.913903	1.03893
ieu-b-85.vcf	ebi-a-GCST90001542	Effector Memory CD4+ T cell Absolute Count	id:ebi-a-GCST90001542	101	-0.0273115	0.0661595	0.680636	-0.156984	0.102361	0.973058	0.854718	1.10778
ieu-b-85.vcf	ebi-a-GCST90001542	Effector Memory CD4+ T cell Absolute Count	id:ebi-a-GCST90001542	101	-0.0310361	0.0479452	0.517422	-0.125009	0.0629364	0.969441	0.882489	1.06496
ieu-b-85.vcf	ebi-a-GCST90001542	Effector Memory CD4+ T cell Absolute Count	id:ebi-a-GCST90001542	101	-0.0471725	0.0727149	0.517999	-0.189694	0.0953488	0.953923	0.827212	1.10004
ieu-b-85.vcf	ebi-a-GCST90002080	SSC-A on T cell	id:ebi-a-GCST90002080	90	-0.0142847	0.0341147	0.675415	-0.0811495	0.05258	0.985817	0.922056	1.05399
ieu-b-85.vcf	ebi-a-GCST90002080	SSC-A on T cell	id:ebi-a-GCST90002080	90	-0.00179298	0.0699926	0.979621	-0.138979	0.135393	0.998209	0.870247	1.14499
ieu-b-85.vcf	ebi-a-GCST90002080	SSC-A on T cell	id:ebi-a-GCST90002080	90	-0.00204169	0.0505997	0.967814	-0.101217	0.0971338	0.99796	0.903737	1.10201
ieu-b-85.vcf	ebi-a-GCST90002080	SSC-A on T cell	id:ebi-a-GCST90002080	90	-0.0104011	0.0651129	0.873448	-0.138022	0.11722	0.989653	0.871079	1.12437
ieu-b-85.vcf	ebi-a-GCST90001795	CD25 on transitional B cell	id:ebi-a-GCST90001795	88	0.0284289	0.0324291	0.380678	-0.0351321	0.0919898	1.02884	0.965478	1.09635
ieu-b-85.vcf	ebi-a-GCST90001795	CD25 on transitional B cell	id:ebi-a-GCST90001795	88	0.129718	0.0648163	0.0485111	0.00267798	0.256758	1.13851	1.00268	1.29273
ieu-b-85.vcf	ebi-a-GCST90001795	CD25 on transitional B cell	id:ebi-a-GCST90001795	88	0.0652269	0.0486938	0.180398	-0.030213	0.160667	1.0674	0.970239	1.17429
ieu-b-85.vcf	ebi-a-GCST90001795	CD25 on transitional B cell	id:ebi-a-GCST90001795	88	0.0617312	0.0571251	0.282847	-0.050234	0.173696	1.06368	0.951007	1.18969
ieu-b-85.vcf	ebi-a-GCST90001744	CD20 on CD20- CD38- B cell	id:ebi-a-GCST90001744	87	0.073816	0.0322989	0.0222892	0.0105102	0.137122	1.07661	1.01057	1.14697
ieu-b-85.vcf	ebi-a-GCST90001744	CD20 on CD20- CD38- B cell	id:ebi-a-GCST90001744	87	0.0634401	0.064973	0.331634	-0.063907	0.190787	1.0655	0.938092	1.2102
ieu-b-85.vcf	ebi-a-GCST90001744	CD20 on CD20- CD38- B cell	id:ebi-a-GCST90001744	87	0.0964444	0.0484478	0.0465154	0.0014867	0.191402	1.10125	1.00149	1.21095
ieu-b-85.vcf	ebi-a-GCST90001744	CD20 on CD20- CD38- B cell	id:ebi-a-GCST90001744	87	0.117417	0.0798926	0.145297	-0.0391728	0.274006	1.12459	0.961584	1.31522
ieu-b-85.vcf	ebi-a-GCST90001989	CD40 on CD14- CD16+ monocyte	id:ebi-a-GCST90001989	93	0.0212166	0.0324918	0.513767	-0.0424673	0.0849005	1.02144	0.958422	1.08861
ieu-b-85.vcf	ebi-a-GCST90001989	CD40 on CD14- CD16+ monocyte	id:ebi-a-GCST90001989	93	0.000450086	0.0661278	0.994584	-0.12916	0.130061	1.00045	0.878833	1.1389
ieu-b-85.vcf	ebi-a-GCST90001989	CD40 on CD14- CD16+ monocyte	id:ebi-a-GCST90001989	93	0.0229578	0.0491716	0.640578	-0.0734186	0.119334	1.02322	0.929212	1.12675
ieu-b-85.vcf	ebi-a-GCST90001989	CD40 on CD14- CD16+ monocyte	id:ebi-a-GCST90001989	93	0.0803507	0.0727188	0.272063	-0.0621783	0.22288	1.08367	0.939715	1.24967
ieu-b-85.vcf	ebi-a-GCST90002037	CD80 on plasmacytoid Dendritic Cell	id:ebi-a-GCST90002037	86	0.0215221	0.0370157	0.56095	-0.0510287	0.0940729	1.02176	0.950251	1.09864
ieu-b-85.vcf	ebi-a-GCST90002037	CD80 on plasmacytoid Dendritic Cell	id:ebi-a-GCST90002037	86	0.054376	0.0759592	0.476065	-0.0945042	0.203256	1.05588	0.909824	1.22539
ieu-b-85.vcf	ebi-a-GCST90002037	CD80 on plasmacytoid Dendritic Cell	id:ebi-a-GCST90002037	86	0.0110296	0.0533572	0.836234	-0.0935504	0.11561	1.01109	0.910692	1.12256
ieu-b-85.vcf	ebi-a-GCST90002037	CD80 on plasmacytoid Dendritic Cell	id:ebi-a-GCST90002037	86	0.0325258	0.0726405	0.655463	-0.10985	0.174901	1.03306	0.895969	1.19113
ieu-b-85.vcf	ebi-a-GCST90001833	CD62L on CD62L+ Dendritic Cell	id:ebi-a-GCST90001833	87	0.00913013	0.0343342	0.790301	-0.0581649	0.0764252	1.00917	0.943494	1.07942
ieu-b-85.vcf	ebi-a-GCST90001833	CD62L on CD62L+ Dendritic Cell	id:ebi-a-GCST90001833	87	0.0450345	0.069676	0.519799	-0.0915303	0.181599	1.04606	0.912534	1.19913
ieu-b-85.vcf	ebi-a-GCST90001833	CD62L on CD62L+ Dendritic Cell	id:ebi-a-GCST90001833	87	0.0509095	0.0507123	0.315433	-0.0484867	0.150306	1.05223	0.95267	1.16219
ieu-b-85.vcf	ebi-a-GCST90001833	CD62L on CD62L+ Dendritic Cell	id:ebi-a-GCST90001833	87	0.0807578	0.0602052	0.18333	-0.0372444	0.19876	1.08411	0.963441	1.21989
ieu-b-85.vcf	ebi-a-GCST90001556	Effector Memory CD8+ T cell %T cell	id:ebi-a-GCST90001556	90	-0.0163531	0.0324427	0.614219	-0.0799408	0.0472346	0.98378	0.923171	1.04837
ieu-b-85.vcf	ebi-a-GCST90001556	Effector Memory CD8+ T cell %T cell	id:ebi-a-GCST90001556	90	0.00442764	0.0646466	0.945551	-0.12228	0.131135	1.00444	0.884901	1.14012
ieu-b-85.vcf	ebi-a-GCST90001556	Effector Memory CD8+ T cell %T cell	id:ebi-a-GCST90001556	90	-0.022065	0.0509138	0.66474	-0.121856	0.0777261	0.978177	0.885276	1.08083
ieu-b-85.vcf	ebi-a-GCST90001556	Effector Memory CD8+ T cell %T cell	id:ebi-a-GCST90001556	90	-0.0708128	0.0704075	0.31726	-0.208812	0.067186	0.931636	0.811548	1.06949
ieu-b-85.vcf	ebi-a-GCST90001546	Terminally Differentiated CD4+ T cell %CD4+ T cell	id:ebi-a-GCST90001546	95	-0.020495	0.0321122	0.523323	-0.0834349	0.0424448	0.979714	0.919951	1.04336
ieu-b-85.vcf	ebi-a-GCST90001546	Terminally Differentiated CD4+ T cell %CD4+ T cell	id:ebi-a-GCST90001546	95	-0.0516194	0.0653084	0.431308	-0.179624	0.076385	0.94969	0.835585	1.07938
ieu-b-85.vcf	ebi-a-GCST90001546	Terminally Differentiated CD4+ T cell %CD4+ T cell	id:ebi-a-GCST90001546	95	0.0040813	0.0487154	0.933233	-0.0914009	0.0995635	1.00409	0.912652	1.10469
ieu-b-85.vcf	ebi-a-GCST90001546	Terminally Differentiated CD4+ T cell %CD4+ T cell	id:ebi-a-GCST90001546	95	0.0484129	0.0774918	0.53365	-0.103471	0.200297	1.0496	0.901702	1.22177
ieu-b-85.vcf	ebi-a-GCST90001986	CD14 on CD14+ CD16- monocyte	id:ebi-a-GCST90001986	100	0.060404	0.0312281	0.0530785	-0.000803134	0.121611	1.06227	0.999197	1.12931
ieu-b-85.vcf	ebi-a-GCST90001986	CD14 on CD14+ CD16- monocyte	id:ebi-a-GCST90001986	100	0.0492438	0.0633712	0.43899	-0.0749639	0.173451	1.05048	0.927777	1.1894
ieu-b-85.vcf	ebi-a-GCST90001986	CD14 on CD14+ CD16- monocyte	id:ebi-a-GCST90001986	100	0.0597629	0.0490642	0.223203	-0.0364029	0.155929	1.06158	0.964252	1.16874
ieu-b-85.vcf	ebi-a-GCST90001986	CD14 on CD14+ CD16- monocyte	id:ebi-a-GCST90001986	100	-0.013186	0.0723943	0.855844	-0.155079	0.128707	0.986901	0.856348	1.13736
ieu-b-85.vcf	ebi-a-GCST90001732	CD19 on IgD- CD27- B cell	id:ebi-a-GCST90001732	92	-0.0177583	0.0324168	0.58382	-0.0812952	0.0457785	0.982398	0.921922	1.04684
ieu-b-85.vcf	ebi-a-GCST90001732	CD19 on IgD- CD27- B cell	id:ebi-a-GCST90001732	92	0.0107859	0.0656882	0.869943	-0.117963	0.139535	1.01084	0.888729	1.14974
ieu-b-85.vcf	ebi-a-GCST90001732	CD19 on IgD- CD27- B cell	id:ebi-a-GCST90001732	92	-0.0254812	0.0498971	0.609578	-0.12328	0.0723171	0.974841	0.884017	1.075
ieu-b-85.vcf	ebi-a-GCST90001732	CD19 on IgD- CD27- B cell	id:ebi-a-GCST90001732	92	-0.0858171	0.0762081	0.263089	-0.235185	0.0635508	0.917762	0.790425	1.06561
ieu-b-85.vcf	ebi-a-GCST90001821	IgD on IgD+ CD24- B cell	id:ebi-a-GCST90001821	86	-0.00672486	0.0332303	0.839626	-0.0718562	0.0584065	0.993298	0.930665	1.06015
ieu-b-85.vcf	ebi-a-GCST90001821	IgD on IgD+ CD24- B cell	id:ebi-a-GCST90001821	86	-0.053203	0.0659577	0.422162	-0.18248	0.0760742	0.948188	0.833201	1.07904
ieu-b-85.vcf	ebi-a-GCST90001821	IgD on IgD+ CD24- B cell	id:ebi-a-GCST90001821	86	-0.0332284	0.0488958	0.496774	-0.129064	0.0626075	0.967318	0.878918	1.06461
ieu-b-85.vcf	ebi-a-GCST90001821	IgD on IgD+ CD24- B cell	id:ebi-a-GCST90001821	86	-0.108018	0.0718289	0.136332	-0.248803	0.0327662	0.897611	0.779733	1.03331
ieu-b-85.vcf	ebi-a-GCST90001480	Resting CD4 regulatory T cell Absolute Count	id:ebi-a-GCST90001480	86	-0.0155066	0.0310363	0.617338	-0.0763377	0.0453246	0.984613	0.926503	1.04637
ieu-b-85.vcf	ebi-a-GCST90001480	Resting CD4 regulatory T cell Absolute Count	id:ebi-a-GCST90001480	86	-0.0361582	0.0624657	0.56424	-0.158591	0.0862745	0.964488	0.853345	1.09011
ieu-b-85.vcf	ebi-a-GCST90001480	Resting CD4 regulatory T cell Absolute Count	id:ebi-a-GCST90001480	86	-0.0213509	0.0455133	0.638989	-0.110557	0.0678553	0.978875	0.895335	1.07021
ieu-b-85.vcf	ebi-a-GCST90001480	Resting CD4 regulatory T cell Absolute Count	id:ebi-a-GCST90001480	86	-0.0364103	0.0608755	0.551356	-0.155726	0.0829057	0.964245	0.855793	1.08644
ieu-b-85.vcf	ebi-a-GCST90001563	Central Memory CD4-CD8- T cell Absolute Count	id:ebi-a-GCST90001563	97	-0.0287082	0.0275211	0.296885	-0.0826496	0.0252331	0.9717	0.920674	1.02555
ieu-b-85.vcf	ebi-a-GCST90001563	Central Memory CD4-CD8- T cell Absolute Count	id:ebi-a-GCST90001563	97	-0.0271763	0.0564093	0.631077	-0.137739	0.083386	0.97319	0.871326	1.08696
ieu-b-85.vcf	ebi-a-GCST90001563	Central Memory CD4-CD8- T cell Absolute Count	id:ebi-a-GCST90001563	97	-0.0237132	0.0407222	0.560353	-0.103529	0.0561023	0.976566	0.90165	1.05771
ieu-b-85.vcf	ebi-a-GCST90001563	Central Memory CD4-CD8- T cell Absolute Count	id:ebi-a-GCST90001563	97	-0.0369071	0.0637864	0.564211	-0.161928	0.0881143	0.963766	0.850502	1.09211
ieu-b-85.vcf	ebi-a-GCST90001466	CD86+ plasmacytoid Dendritic Cell Absolute Count	id:ebi-a-GCST90001466	88	0.0287557	0.0328162	0.380886	-0.035564	0.0930755	1.02917	0.965061	1.09754
ieu-b-85.vcf	ebi-a-GCST90001466	CD86+ plasmacytoid Dendritic Cell Absolute Count	id:ebi-a-GCST90001466	88	0.0216971	0.0676009	0.74902	-0.110801	0.154195	1.02193	0.895117	1.16672
ieu-b-85.vcf	ebi-a-GCST90001466	CD86+ plasmacytoid Dendritic Cell Absolute Count	id:ebi-a-GCST90001466	88	0.037767	0.0461459	0.413114	-0.0526789	0.128213	1.03849	0.948685	1.1368
ieu-b-85.vcf	ebi-a-GCST90001466	CD86+ plasmacytoid Dendritic Cell Absolute Count	id:ebi-a-GCST90001466	88	0.0176176	0.0579055	0.761665	-0.0958772	0.131112	1.01777	0.908576	1.1401
ieu-b-85.vcf	ebi-a-GCST90001664	CD28+ CD45RA+ CD8dim T cell %T cell	id:ebi-a-GCST90001664	90	-0.0198842	0.0310153	0.52145	-0.0806742	0.0409057	0.980312	0.922494	1.04175
ieu-b-85.vcf	ebi-a-GCST90001664	CD28+ CD45RA+ CD8dim T cell %T cell	id:ebi-a-GCST90001664	90	0.0278336	0.0612747	0.650773	-0.0922648	0.147932	1.02822	0.911864	1.15943
ieu-b-85.vcf	ebi-a-GCST90001664	CD28+ CD45RA+ CD8dim T cell %T cell	id:ebi-a-GCST90001664	90	-0.0760968	0.0457842	0.0964974	-0.165834	0.0136402	0.926727	0.847187	1.01373
ieu-b-85.vcf	ebi-a-GCST90001664	CD28+ CD45RA+ CD8dim T cell %T cell	id:ebi-a-GCST90001664	90	-0.0943033	0.0696921	0.179437	-0.2309	0.0422932	0.910007	0.793819	1.0432
ieu-b-85.vcf	ebi-a-GCST90001967	FSC-A on CD14+ monocyte	id:ebi-a-GCST90001967	93	-0.00965821	0.0350282	0.782758	-0.0783135	0.0589971	0.990388	0.924675	1.06077
ieu-b-85.vcf	ebi-a-GCST90001967	FSC-A on CD14+ monocyte	id:ebi-a-GCST90001967	93	0.0242255	0.070882	0.73331	-0.114703	0.163154	1.02452	0.891631	1.17722
ieu-b-85.vcf	ebi-a-GCST90001967	FSC-A on CD14+ monocyte	id:ebi-a-GCST90001967	93	0.027068	0.055046	0.622907	-0.0808221	0.134958	1.02744	0.922358	1.14449
ieu-b-85.vcf	ebi-a-GCST90001967	FSC-A on CD14+ monocyte	id:ebi-a-GCST90001967	93	0.0614227	0.0822161	0.456916	-0.099721	0.222566	1.06335	0.90509	1.24928
ieu-b-85.vcf	ebi-a-GCST90001595	CD4+CD8+ T cell %T cell	id:ebi-a-GCST90001595	29	0.0617386	0.0650463	0.342545	-0.0657521	0.189229	1.06368	0.936363	1.20832
ieu-b-85.vcf	ebi-a-GCST90001595	CD4+CD8+ T cell %T cell	id:ebi-a-GCST90001595	29	0.055407	0.152247	0.718747	-0.242998	0.353812	1.05697	0.784273	1.42449
ieu-b-85.vcf	ebi-a-GCST90001595	CD4+CD8+ T cell %T cell	id:ebi-a-GCST90001595	29	0.0767101	0.0898634	0.39331	-0.0994222	0.252842	1.07973	0.90536	1.28768
ieu-b-85.vcf	ebi-a-GCST90001595	CD4+CD8+ T cell %T cell	id:ebi-a-GCST90001595	29	0.0940402	0.104045	0.373789	-0.109887	0.297968	1.0986	0.895935	1.34712
ieu-b-85.vcf	ebi-a-GCST90001891	CD28 on CD45RA- CD4 not regulatory T cell	id:ebi-a-GCST90001891	97	0.0384393	0.035232	0.275259	-0.0306155	0.107494	1.03919	0.969848	1.11348
ieu-b-85.vcf	ebi-a-GCST90001891	CD28 on CD45RA- CD4 not regulatory T cell	id:ebi-a-GCST90001891	97	0.0642142	0.0711923	0.369348	-0.0753228	0.203751	1.06632	0.927444	1.22599
ieu-b-85.vcf	ebi-a-GCST90001891	CD28 on CD45RA- CD4 not regulatory T cell	id:ebi-a-GCST90001891	97	0.058905	0.0504976	0.243417	-0.0400704	0.15788	1.06067	0.960722	1.17103
ieu-b-85.vcf	ebi-a-GCST90001891	CD28 on CD45RA- CD4 not regulatory T cell	id:ebi-a-GCST90001891	97	0.0571566	0.0773279	0.461621	-0.094406	0.208719	1.05882	0.909913	1.2321
ieu-b-85.vcf	ebi-a-GCST90001826	IgD on unswitched memory B cell	id:ebi-a-GCST90001826	95	-0.0544789	0.0326345	0.0950449	-0.118443	0.00948469	0.946978	0.888303	1.00953
ieu-b-85.vcf	ebi-a-GCST90001826	IgD on unswitched memory B cell	id:ebi-a-GCST90001826	95	-0.0729464	0.0658828	0.271057	-0.202077	0.0561838	0.929651	0.817032	1.05779
ieu-b-85.vcf	ebi-a-GCST90001826	IgD on unswitched memory B cell	id:ebi-a-GCST90001826	95	-0.0612672	0.0492167	0.213189	-0.157732	0.0351976	0.940572	0.854079	1.03582
ieu-b-85.vcf	ebi-a-GCST90001826	IgD on unswitched memory B cell	id:ebi-a-GCST90001826	95	-0.158125	0.0926788	0.0912803	-0.339775	0.0235256	0.853743	0.71193	1.0238
ieu-b-85.vcf	ebi-a-GCST90001880	HVEM on CD45RA- CD4+ T cell	id:ebi-a-GCST90001880	60	0.00838826	0.0621502	0.892638	-0.113426	0.130203	1.00842	0.89277	1.13906
ieu-b-85.vcf	ebi-a-GCST90001880	HVEM on CD45RA- CD4+ T cell	id:ebi-a-GCST90001880	60	-0.0243777	0.118732	0.838043	-0.257092	0.208337	0.975917	0.773297	1.23163
ieu-b-85.vcf	ebi-a-GCST90001880	HVEM on CD45RA- CD4+ T cell	id:ebi-a-GCST90001880	60	-0.0312463	0.0882208	0.723202	-0.204159	0.141667	0.969237	0.815333	1.15219
ieu-b-85.vcf	ebi-a-GCST90001880	HVEM on CD45RA- CD4+ T cell	id:ebi-a-GCST90001880	60	-0.0366113	0.106259	0.73166	-0.244879	0.171656	0.964051	0.782799	1.18727
ieu-b-85.vcf	ebi-a-GCST90001867	CD3 on CD4+ T cell	id:ebi-a-GCST90001867	93	0.00870526	0.0350198	0.803685	-0.0599335	0.077344	1.00874	0.941827	1.08041
ieu-b-85.vcf	ebi-a-GCST90001867	CD3 on CD4+ T cell	id:ebi-a-GCST90001867	93	0.0483887	0.0698196	0.490041	-0.0884576	0.185235	1.04958	0.915342	1.2035
ieu-b-85.vcf	ebi-a-GCST90001867	CD3 on CD4+ T cell	id:ebi-a-GCST90001867	93	0.0222024	0.052052	0.669712	-0.0798194	0.124224	1.02245	0.923283	1.13227
ieu-b-85.vcf	ebi-a-GCST90001867	CD3 on CD4+ T cell	id:ebi-a-GCST90001867	93	0.0321849	0.0724161	0.657765	-0.109751	0.17412	1.03271	0.896058	1.1902
ieu-b-85.vcf	ebi-a-GCST90001644	B cell %lymphocyte	id:ebi-a-GCST90001644	93	0.0241192	0.0326424	0.459974	-0.03986	0.0880984	1.02441	0.960924	1.0921
ieu-b-85.vcf	ebi-a-GCST90001644	B cell %lymphocyte	id:ebi-a-GCST90001644	93	0.0110103	0.0664814	0.868828	-0.119293	0.141314	1.01107	0.887547	1.15179
ieu-b-85.vcf	ebi-a-GCST90001644	B cell %lymphocyte	id:ebi-a-GCST90001644	93	-0.018368	0.0509063	0.718235	-0.118144	0.0814083	0.9818	0.888568	1.08481
ieu-b-85.vcf	ebi-a-GCST90001644	B cell %lymphocyte	id:ebi-a-GCST90001644	93	-0.0612413	0.0875661	0.486084	-0.232871	0.110388	0.940596	0.792256	1.11671
ieu-b-85.vcf	ebi-a-GCST90002061	CD4 on CD39+ CD4+ T cell	id:ebi-a-GCST90002061	90	0.0341488	0.0366783	0.351834	-0.0377406	0.106038	1.03474	0.962963	1.11186
ieu-b-85.vcf	ebi-a-GCST90002061	CD4 on CD39+ CD4+ T cell	id:ebi-a-GCST90002061	90	-0.0148853	0.0739627	0.840964	-0.159852	0.130082	0.985225	0.85227	1.13892
ieu-b-85.vcf	ebi-a-GCST90002061	CD4 on CD39+ CD4+ T cell	id:ebi-a-GCST90002061	90	0.0128923	0.0523499	0.805472	-0.0897136	0.115498	1.01298	0.914193	1.12243
ieu-b-85.vcf	ebi-a-GCST90002061	CD4 on CD39+ CD4+ T cell	id:ebi-a-GCST90002061	90	-0.105366	0.086825	0.228134	-0.275543	0.0648112	0.899995	0.75916	1.06696
ieu-b-85.vcf	ebi-a-GCST90001911	CD45 on Natural Killer	id:ebi-a-GCST90001911	88	-0.0114324	0.0354778	0.747271	-0.0809689	0.0581042	0.988633	0.922222	1.05983
ieu-b-85.vcf	ebi-a-GCST90001911	CD45 on Natural Killer	id:ebi-a-GCST90001911	88	0.0210401	0.071292	0.768609	-0.118692	0.160772	1.02126	0.888081	1.17442
ieu-b-85.vcf	ebi-a-GCST90001911	CD45 on Natural Killer	id:ebi-a-GCST90001911	88	-0.0212269	0.0498142	0.67002	-0.118863	0.0764091	0.978997	0.88793	1.0794
ieu-b-85.vcf	ebi-a-GCST90001911	CD45 on Natural Killer	id:ebi-a-GCST90001911	88	-0.0369593	0.0642314	0.566501	-0.162853	0.0889343	0.963715	0.849716	1.09301
ieu-b-85.vcf	ebi-a-GCST90001864	CD3 on CD28+ CD45RA+ CD8+ T cell	id:ebi-a-GCST90001864	88	0.00675494	0.0357853	0.850279	-0.0633842	0.0768941	1.00678	0.938583	1.07993
ieu-b-85.vcf	ebi-a-GCST90001864	CD3 on CD28+ CD45RA+ CD8+ T cell	id:ebi-a-GCST90001864	88	0.0786934	0.072353	0.279797	-0.0631186	0.220505	1.08187	0.938832	1.24671
ieu-b-85.vcf	ebi-a-GCST90001864	CD3 on CD28+ CD45RA+ CD8+ T cell	id:ebi-a-GCST90001864	88	0.0059223	0.0529019	0.910864	-0.0977653	0.10961	1.00594	0.906862	1.11584
ieu-b-85.vcf	ebi-a-GCST90001864	CD3 on CD28+ CD45RA+ CD8+ T cell	id:ebi-a-GCST90001864	88	0.0460257	0.0735596	0.533155	-0.0981512	0.190203	1.0471	0.906512	1.20949
ieu-b-85.vcf	ebi-a-GCST90002029	CD39 on CD39+ CD8+ T cell	id:ebi-a-GCST90002029	87	-0.00403936	0.0359864	0.910628	-0.0745726	0.0664939	0.995969	0.92814	1.06875
ieu-b-85.vcf	ebi-a-GCST90002029	CD39 on CD39+ CD8+ T cell	id:ebi-a-GCST90002029	87	-0.0359221	0.0727622	0.622797	-0.178536	0.106692	0.964715	0.836494	1.11259
ieu-b-85.vcf	ebi-a-GCST90002029	CD39 on CD39+ CD8+ T cell	id:ebi-a-GCST90002029	87	-0.0406027	0.0541315	0.453209	-0.1467	0.065495	0.960211	0.863553	1.06769
ieu-b-85.vcf	ebi-a-GCST90002029	CD39 on CD39+ CD8+ T cell	id:ebi-a-GCST90002029	87	-0.0562224	0.072383	0.439447	-0.198093	0.0856484	0.945329	0.820294	1.08942
ieu-b-85.vcf	ebi-a-GCST90002083	SSC-A on HLA DR+ T cell	id:ebi-a-GCST90002083	91	-0.0492503	0.0359514	0.170713	-0.119715	0.0212144	0.951943	0.887173	1.02144
ieu-b-85.vcf	ebi-a-GCST90002083	SSC-A on HLA DR+ T cell	id:ebi-a-GCST90002083	91	-0.129914	0.0734765	0.0804707	-0.273928	0.0141	0.878171	0.760387	1.0142
ieu-b-85.vcf	ebi-a-GCST90002083	SSC-A on HLA DR+ T cell	id:ebi-a-GCST90002083	91	-0.0449748	0.055019	0.413676	-0.152812	0.0628625	0.956022	0.858291	1.06488
ieu-b-85.vcf	ebi-a-GCST90002083	SSC-A on HLA DR+ T cell	id:ebi-a-GCST90002083	91	-0.0924858	0.0672491	0.172461	-0.224294	0.0393225	0.911662	0.79908	1.04011
ieu-b-85.vcf	ebi-a-GCST90001834	CD62L on monocyte	id:ebi-a-GCST90001834	79	-0.0060342	0.037613	0.872544	-0.0797557	0.0676873	0.993984	0.923342	1.07003
ieu-b-85.vcf	ebi-a-GCST90001834	CD62L on monocyte	id:ebi-a-GCST90001834	79	0.00522575	0.0760674	0.945407	-0.143866	0.154318	1.00524	0.866003	1.16686
ieu-b-85.vcf	ebi-a-GCST90001834	CD62L on monocyte	id:ebi-a-GCST90001834	79	0.0221594	0.0543374	0.683413	-0.0843419	0.128661	1.02241	0.919117	1.1373
ieu-b-85.vcf	ebi-a-GCST90001834	CD62L on monocyte	id:ebi-a-GCST90001834	79	0.0300181	0.0637547	0.639071	-0.0949411	0.154977	1.03047	0.909427	1.16763
ieu-b-85.vcf	ebi-a-GCST90001446	IgD- CD38- B cell Absolute Count	id:ebi-a-GCST90001446	97	0.0411086	0.032385	0.204309	-0.0223661	0.104583	1.04197	0.977882	1.11025
ieu-b-85.vcf	ebi-a-GCST90001446	IgD- CD38- B cell Absolute Count	id:ebi-a-GCST90001446	97	0.0696687	0.0661899	0.295214	-0.0600636	0.199401	1.07215	0.941705	1.22067
ieu-b-85.vcf	ebi-a-GCST90001446	IgD- CD38- B cell Absolute Count	id:ebi-a-GCST90001446	97	0.0823885	0.0493797	0.0952228	-0.0143957	0.179173	1.08588	0.985707	1.19623
ieu-b-85.vcf	ebi-a-GCST90001446	IgD- CD38- B cell Absolute Count	id:ebi-a-GCST90001446	97	0.139218	0.0835919	0.0990837	-0.0246222	0.303058	1.14937	0.975678	1.35399
ieu-b-85.vcf	ebi-a-GCST90001623	Natural Killer T %lymphocyte	id:ebi-a-GCST90001623	93	-0.0118946	0.0341091	0.727298	-0.0787484	0.0549592	0.988176	0.924272	1.0565
ieu-b-85.vcf	ebi-a-GCST90001623	Natural Killer T %lymphocyte	id:ebi-a-GCST90001623	93	-0.081933	0.0694162	0.24095	-0.217989	0.0541226	0.921334	0.804135	1.05561
ieu-b-85.vcf	ebi-a-GCST90001623	Natural Killer T %lymphocyte	id:ebi-a-GCST90001623	93	-0.0410248	0.0529315	0.438307	-0.14477	0.0627209	0.959805	0.865221	1.06473
ieu-b-85.vcf	ebi-a-GCST90001623	Natural Killer T %lymphocyte	id:ebi-a-GCST90001623	93	-0.0698949	0.0674972	0.303139	-0.202189	0.0623996	0.932492	0.81694	1.06439
ieu-b-85.vcf	ebi-a-GCST90001831	CD62L on CD62L+ myeloid Dendritic Cell	id:ebi-a-GCST90001831	89	-0.00453662	0.0346502	0.895834	-0.072451	0.0633778	0.995474	0.930111	1.06543
ieu-b-85.vcf	ebi-a-GCST90001831	CD62L on CD62L+ myeloid Dendritic Cell	id:ebi-a-GCST90001831	89	0.00329381	0.0679943	0.961475	-0.129975	0.136563	1.0033	0.878117	1.14633
ieu-b-85.vcf	ebi-a-GCST90001831	CD62L on CD62L+ myeloid Dendritic Cell	id:ebi-a-GCST90001831	89	0.0126594	0.0491108	0.796582	-0.0835977	0.108917	1.01274	0.919801	1.11507
ieu-b-85.vcf	ebi-a-GCST90001831	CD62L on CD62L+ myeloid Dendritic Cell	id:ebi-a-GCST90001831	89	0.037939	0.0594358	0.524923	-0.0785551	0.154433	1.03867	0.924451	1.167
ieu-b-85.vcf	ebi-a-GCST90002058	CD8 on CD8+ T cell	id:ebi-a-GCST90002058	81	0.0307814	0.035451	0.38524	-0.0387025	0.100265	1.03126	0.962037	1.10546
ieu-b-85.vcf	ebi-a-GCST90002058	CD8 on CD8+ T cell	id:ebi-a-GCST90002058	81	0.0170006	0.0722792	0.814657	-0.124667	0.158668	1.01715	0.882791	1.17195
ieu-b-85.vcf	ebi-a-GCST90002058	CD8 on CD8+ T cell	id:ebi-a-GCST90002058	81	0.0453983	0.0549594	0.408785	-0.0623221	0.153119	1.04644	0.93958	1.16546
ieu-b-85.vcf	ebi-a-GCST90002058	CD8 on CD8+ T cell	id:ebi-a-GCST90002058	81	0.0438119	0.0868158	0.61519	-0.126347	0.213971	1.04479	0.881309	1.23859
ieu-b-85.vcf	ebi-a-GCST90001784	CD25 on IgD+ CD38dim B cell	id:ebi-a-GCST90001784	91	0.00478993	0.0325962	0.883174	-0.0590986	0.0686785	1.0048	0.942614	1.07109
ieu-b-85.vcf	ebi-a-GCST90001784	CD25 on IgD+ CD38dim B cell	id:ebi-a-GCST90001784	91	0.0400761	0.0661631	0.546244	-0.0896036	0.169756	1.04089	0.914294	1.18502
ieu-b-85.vcf	ebi-a-GCST90001784	CD25 on IgD+ CD38dim B cell	id:ebi-a-GCST90001784	91	0.0180673	0.0498353	0.716948	-0.0796098	0.115744	1.01823	0.923477	1.12271
ieu-b-85.vcf	ebi-a-GCST90001784	CD25 on IgD+ CD38dim B cell	id:ebi-a-GCST90001784	91	0.0587862	0.0734857	0.425836	-0.0852458	0.202818	1.06055	0.918287	1.22485
ieu-b-85.vcf	ebi-a-GCST90001633	CD8dim Natural Killer T Absolute Count	id:ebi-a-GCST90001633	96	-0.075542	0.0316381	0.0169546	-0.137553	-0.0135313	0.927241	0.871488	0.98656
ieu-b-85.vcf	ebi-a-GCST90001633	CD8dim Natural Killer T Absolute Count	id:ebi-a-GCST90001633	96	-0.0946916	0.0651979	0.149728	-0.222479	0.0330963	0.909653	0.800531	1.03365
ieu-b-85.vcf	ebi-a-GCST90001633	CD8dim Natural Killer T Absolute Count	id:ebi-a-GCST90001633	96	-0.0858008	0.0484993	0.0768748	-0.180859	0.00925783	0.917777	0.834553	1.0093
ieu-b-85.vcf	ebi-a-GCST90001633	CD8dim Natural Killer T Absolute Count	id:ebi-a-GCST90001633	96	-0.116831	0.073115	0.113385	-0.260136	0.0264747	0.889736	0.770947	1.02683
ieu-b-85.vcf	ebi-a-GCST90001671	CD39+ CD8+ T cell %CD8+ T cell	id:ebi-a-GCST90001671	95	-0.024876	0.0329728	0.450584	-0.0895026	0.0397506	0.975431	0.914386	1.04055
ieu-b-85.vcf	ebi-a-GCST90001671	CD39+ CD8+ T cell %CD8+ T cell	id:ebi-a-GCST90001671	95	-0.0460779	0.0660604	0.487223	-0.175556	0.0834005	0.954968	0.83899	1.08698
ieu-b-85.vcf	ebi-a-GCST90001671	CD39+ CD8+ T cell %CD8+ T cell	id:ebi-a-GCST90001671	95	-0.0328793	0.0520955	0.527953	-0.134986	0.0692279	0.967655	0.873728	1.07168
ieu-b-85.vcf	ebi-a-GCST90001671	CD39+ CD8+ T cell %CD8+ T cell	id:ebi-a-GCST90001671	95	0.0327109	0.0854128	0.702604	-0.134698	0.20012	1.03325	0.87398	1.22155
ieu-b-85.vcf	ebi-a-GCST90001762	CD20 on IgD+ B cell	id:ebi-a-GCST90001762	96	0.0045228	0.0317765	0.886818	-0.0577591	0.0668047	1.00453	0.943877	1.06909
ieu-b-85.vcf	ebi-a-GCST90001762	CD20 on IgD+ B cell	id:ebi-a-GCST90001762	96	0.00242123	0.064938	0.970337	-0.124857	0.1297	1.00242	0.882623	1.13849
ieu-b-85.vcf	ebi-a-GCST90001762	CD20 on IgD+ B cell	id:ebi-a-GCST90001762	96	-0.0359578	0.0458401	0.432795	-0.125804	0.0538888	0.964681	0.881787	1.05537
ieu-b-85.vcf	ebi-a-GCST90001762	CD20 on IgD+ B cell	id:ebi-a-GCST90001762	96	-0.0382464	0.060414	0.528208	-0.156658	0.0801651	0.962476	0.854996	1.08347
ieu-b-85.vcf	ebi-a-GCST90002026	CD4 on Terminally Differentiated CD4+ T cell	id:ebi-a-GCST90002026	84	0.0114354	0.0368377	0.756236	-0.0607665	0.0836374	1.0115	0.941043	1.08723
ieu-b-85.vcf	ebi-a-GCST90002026	CD4 on Terminally Differentiated CD4+ T cell	id:ebi-a-GCST90002026	84	0.0197987	0.0728096	0.786363	-0.122908	0.162506	1.02	0.884345	1.17645
ieu-b-85.vcf	ebi-a-GCST90002026	CD4 on Terminally Differentiated CD4+ T cell	id:ebi-a-GCST90002026	84	0.0523051	0.0574648	0.362711	-0.0603259	0.164936	1.0537	0.941458	1.17932
ieu-b-85.vcf	ebi-a-GCST90002026	CD4 on Terminally Differentiated CD4+ T cell	id:ebi-a-GCST90002026	84	0.077219	0.0909271	0.39819	-0.100998	0.255436	1.08028	0.903935	1.29102
ieu-b-85.vcf	ebi-a-GCST90002054	CD8 on Central Memory CD8+ T cell	id:ebi-a-GCST90002054	89	-0.0141988	0.0358088	0.691723	-0.0843841	0.0559864	0.985901	0.919078	1.05758
ieu-b-85.vcf	ebi-a-GCST90002054	CD8 on Central Memory CD8+ T cell	id:ebi-a-GCST90002054	89	-0.0163349	0.0737287	0.82518	-0.160843	0.128173	0.983798	0.851426	1.13675
ieu-b-85.vcf	ebi-a-GCST90002054	CD8 on Central Memory CD8+ T cell	id:ebi-a-GCST90002054	89	-0.0447413	0.0544155	0.410954	-0.151396	0.061913	0.956245	0.859508	1.06387
ieu-b-85.vcf	ebi-a-GCST90002054	CD8 on Central Memory CD8+ T cell	id:ebi-a-GCST90002054	89	-0.0464304	0.0765722	0.545836	-0.196512	0.103651	0.954631	0.821592	1.10921
ieu-b-85.vcf	ebi-a-GCST90001934	CD25 on CD45RA+ CD4 not regulatory T cell	id:ebi-a-GCST90001934	89	0.02076	0.0319115	0.515337	-0.0417866	0.0833066	1.02098	0.959074	1.08687
ieu-b-85.vcf	ebi-a-GCST90001934	CD25 on CD45RA+ CD4 not regulatory T cell	id:ebi-a-GCST90001934	89	0.0461071	0.0640649	0.473642	-0.0794601	0.171674	1.04719	0.923615	1.18729
ieu-b-85.vcf	ebi-a-GCST90001934	CD25 on CD45RA+ CD4 not regulatory T cell	id:ebi-a-GCST90001934	89	0.0613831	0.0492475	0.21261	-0.035142	0.157908	1.06331	0.965468	1.17106
ieu-b-85.vcf	ebi-a-GCST90001934	CD25 on CD45RA+ CD4 not regulatory T cell	id:ebi-a-GCST90001934	89	0.0391795	0.0780072	0.616743	-0.113715	0.192074	1.03996	0.892513	1.21176
ieu-b-85.vcf	ebi-a-GCST90001763	CD20 on transitional B cell	id:ebi-a-GCST90001763	93	-0.0040735	0.0323661	0.899845	-0.0675111	0.0593641	0.995935	0.934717	1.06116
ieu-b-85.vcf	ebi-a-GCST90001763	CD20 on transitional B cell	id:ebi-a-GCST90001763	93	0.00441026	0.0661848	0.947018	-0.125312	0.134132	1.00442	0.882222	1.14354
ieu-b-85.vcf	ebi-a-GCST90001763	CD20 on transitional B cell	id:ebi-a-GCST90001763	93	-0.0286217	0.0493586	0.562	-0.125365	0.0681211	0.971784	0.882175	1.07049
ieu-b-85.vcf	ebi-a-GCST90001763	CD20 on transitional B cell	id:ebi-a-GCST90001763	93	-0.0180654	0.0716305	0.801447	-0.158461	0.12233	0.982097	0.853456	1.13013
ieu-b-85.vcf	ebi-a-GCST90001668	CD28+ CD45RA- CD8dim T cell %CD8dim T cell	id:ebi-a-GCST90001668	95	0.0395331	0.032223	0.219875	-0.0236239	0.10269	1.04032	0.976653	1.10815
ieu-b-85.vcf	ebi-a-GCST90001668	CD28+ CD45RA- CD8dim T cell %CD8dim T cell	id:ebi-a-GCST90001668	95	0.0829573	0.0649308	0.204561	-0.0443071	0.210222	1.0865	0.95666	1.23395
ieu-b-85.vcf	ebi-a-GCST90001668	CD28+ CD45RA- CD8dim T cell %CD8dim T cell	id:ebi-a-GCST90001668	95	0.0611841	0.0474782	0.197509	-0.031873	0.154241	1.06309	0.96863	1.16677
ieu-b-85.vcf	ebi-a-GCST90001668	CD28+ CD45RA- CD8dim T cell %CD8dim T cell	id:ebi-a-GCST90001668	95	0.0710172	0.0680732	0.299509	-0.0624062	0.204441	1.0736	0.939501	1.22684
ieu-b-85.vcf	ebi-a-GCST90001874	HVEM on Terminally Differentiated CD8+ T cell	id:ebi-a-GCST90001874	68	-0.000342694	0.0587905	0.995349	-0.115572	0.114887	0.999657	0.890856	1.12175
ieu-b-85.vcf	ebi-a-GCST90001874	HVEM on Terminally Differentiated CD8+ T cell	id:ebi-a-GCST90001874	68	0.0999401	0.117169	0.396768	-0.129711	0.329591	1.1051	0.878349	1.3904
ieu-b-85.vcf	ebi-a-GCST90001874	HVEM on Terminally Differentiated CD8+ T cell	id:ebi-a-GCST90001874	68	0.00970355	0.0837076	0.907714	-0.154363	0.17377	1.00975	0.856961	1.18978
ieu-b-85.vcf	ebi-a-GCST90001874	HVEM on Terminally Differentiated CD8+ T cell	id:ebi-a-GCST90001874	68	0.115092	0.132999	0.38993	-0.145586	0.375769	1.12198	0.864516	1.45611
ieu-b-85.vcf	ebi-a-GCST90001921	CD45 on HLA DR+ CD8+ T cell	id:ebi-a-GCST90001921	98	0.00983527	0.0341818	0.77355	-0.0571611	0.0768316	1.00988	0.944442	1.07986
ieu-b-85.vcf	ebi-a-GCST90001921	CD45 on HLA DR+ CD8+ T cell	id:ebi-a-GCST90001921	98	0.0216831	0.0685475	0.752445	-0.11267	0.156036	1.02192	0.893445	1.16887
ieu-b-85.vcf	ebi-a-GCST90001921	CD45 on HLA DR+ CD8+ T cell	id:ebi-a-GCST90001921	98	-0.00332587	0.0530533	0.950014	-0.10731	0.100659	0.99668	0.898247	1.1059
ieu-b-85.vcf	ebi-a-GCST90001921	CD45 on HLA DR+ CD8+ T cell	id:ebi-a-GCST90001921	98	-0.087982	0.0863906	0.311011	-0.257308	0.0813436	0.915777	0.77313	1.08474
ieu-b-85.vcf	ebi-a-GCST90001865	CD3 on CD28- CD8+ T cell	id:ebi-a-GCST90001865	88	0.032685	0.036195	0.366513	-0.0382573	0.103627	1.03322	0.962465	1.10919
ieu-b-85.vcf	ebi-a-GCST90001865	CD3 on CD28- CD8+ T cell	id:ebi-a-GCST90001865	88	0.0248083	0.0736949	0.737213	-0.119634	0.16925	1.02512	0.887245	1.18442
ieu-b-85.vcf	ebi-a-GCST90001865	CD3 on CD28- CD8+ T cell	id:ebi-a-GCST90001865	88	0.0255468	0.0519375	0.622807	-0.0762507	0.127344	1.02588	0.926584	1.13581
ieu-b-85.vcf	ebi-a-GCST90001865	CD3 on CD28- CD8+ T cell	id:ebi-a-GCST90001865	88	0.046436	0.0666008	0.487519	-0.0841015	0.176973	1.04753	0.919338	1.1936
ieu-b-85.vcf	ebi-a-GCST90002015	CCR2 on plasmacytoid Dendritic Cell	id:ebi-a-GCST90002015	88	-0.0525996	0.036229	0.146539	-0.123608	0.0184092	0.94876	0.883726	1.01858
ieu-b-85.vcf	ebi-a-GCST90002015	CCR2 on plasmacytoid Dendritic Cell	id:ebi-a-GCST90002015	88	-0.115616	0.07378	0.120778	-0.260225	0.0289926	0.890817	0.770878	1.02942
ieu-b-85.vcf	ebi-a-GCST90002015	CCR2 on plasmacytoid Dendritic Cell	id:ebi-a-GCST90002015	88	-0.0469693	0.0539293	0.383786	-0.152671	0.0587322	0.954117	0.858412	1.06049
ieu-b-85.vcf	ebi-a-GCST90002015	CCR2 on plasmacytoid Dendritic Cell	id:ebi-a-GCST90002015	88	-0.0147779	0.0774739	0.849169	-0.166627	0.137071	0.985331	0.846516	1.14691
ieu-b-85.vcf	ebi-a-GCST90001458	Myeloid Dendritic Cell Absolute Count	id:ebi-a-GCST90001458	93	0.0181742	0.0338537	0.591375	-0.0481791	0.0845274	1.01834	0.952963	1.0882
ieu-b-85.vcf	ebi-a-GCST90001458	Myeloid Dendritic Cell Absolute Count	id:ebi-a-GCST90001458	93	-0.0293306	0.0673335	0.664157	-0.161304	0.102643	0.971095	0.851033	1.1081
ieu-b-85.vcf	ebi-a-GCST90001458	Myeloid Dendritic Cell Absolute Count	id:ebi-a-GCST90001458	93	0.0496799	0.0482506	0.303187	-0.0448912	0.144251	1.05093	0.956101	1.15517
ieu-b-85.vcf	ebi-a-GCST90001458	Myeloid Dendritic Cell Absolute Count	id:ebi-a-GCST90001458	93	0.0284234	0.0603901	0.638996	-0.0899413	0.146788	1.02883	0.913985	1.15811
ieu-b-85.vcf	ebi-a-GCST90001896	CD28 on CD28+ CD45RA+ CD8+ T cell	id:ebi-a-GCST90001896	97	0.00341676	0.035693	0.923738	-0.0665415	0.073375	1.00342	0.935624	1.07613
ieu-b-85.vcf	ebi-a-GCST90001896	CD28 on CD28+ CD45RA+ CD8+ T cell	id:ebi-a-GCST90001896	97	0.0453515	0.0728038	0.534824	-0.0973439	0.188047	1.0464	0.907244	1.20689
ieu-b-85.vcf	ebi-a-GCST90001896	CD28 on CD28+ CD45RA+ CD8+ T cell	id:ebi-a-GCST90001896	97	0.0297263	0.0507248	0.557855	-0.0696944	0.129147	1.03017	0.932679	1.13786
ieu-b-85.vcf	ebi-a-GCST90001896	CD28 on CD28+ CD45RA+ CD8+ T cell	id:ebi-a-GCST90001896	97	0.047093	0.0753561	0.533493	-0.100605	0.194791	1.04822	0.90429	1.21506
ieu-b-85.vcf	ebi-a-GCST90001684	CD127- CD8+ T cell Absolute Count	id:ebi-a-GCST90001684	88	-0.0048587	0.0342431	0.887168	-0.0719752	0.0622578	0.995153	0.930554	1.06424
ieu-b-85.vcf	ebi-a-GCST90001684	CD127- CD8+ T cell Absolute Count	id:ebi-a-GCST90001684	88	-0.0528493	0.0695281	0.449265	-0.189124	0.0834257	0.948523	0.827684	1.087
ieu-b-85.vcf	ebi-a-GCST90001684	CD127- CD8+ T cell Absolute Count	id:ebi-a-GCST90001684	88	-0.0329772	0.0508546	0.516687	-0.132652	0.0666978	0.967561	0.87577	1.06897
ieu-b-85.vcf	ebi-a-GCST90001684	CD127- CD8+ T cell Absolute Count	id:ebi-a-GCST90001684	88	-0.0306138	0.0658904	0.643367	-0.159759	0.0985313	0.96985	0.852349	1.10355
ieu-b-85.vcf	ebi-a-GCST90001599	CD4-CD8- T cell %T cell	id:ebi-a-GCST90001599	96	-0.0522931	0.0310276	0.0919167	-0.113107	0.00852105	0.949051	0.893055	1.00856
ieu-b-85.vcf	ebi-a-GCST90001599	CD4-CD8- T cell %T cell	id:ebi-a-GCST90001599	96	-0.111602	0.0626155	0.0779233	-0.234328	0.0111246	0.8944	0.791102	1.01119
ieu-b-85.vcf	ebi-a-GCST90001599	CD4-CD8- T cell %T cell	id:ebi-a-GCST90001599	96	-0.0449606	0.045979	0.328148	-0.135079	0.0451582	0.956035	0.873647	1.04619
ieu-b-85.vcf	ebi-a-GCST90001599	CD4-CD8- T cell %T cell	id:ebi-a-GCST90001599	96	-0.0106207	0.0647778	0.870115	-0.137585	0.116344	0.989436	0.87146	1.12338
ieu-b-85.vcf	ebi-a-GCST90001866	CD3 on CD39+ CD8+ T cell	id:ebi-a-GCST90001866	81	-0.0057949	0.0365839	0.874141	-0.0774993	0.0659095	0.994222	0.925428	1.06813
ieu-b-85.vcf	ebi-a-GCST90001866	CD3 on CD39+ CD8+ T cell	id:ebi-a-GCST90001866	81	0.0333492	0.0726279	0.647367	-0.109002	0.1757	1.03391	0.896729	1.19208
ieu-b-85.vcf	ebi-a-GCST90001866	CD3 on CD39+ CD8+ T cell	id:ebi-a-GCST90001866	81	0.00411812	0.0554604	0.940809	-0.104584	0.112821	1.00413	0.900699	1.11943
ieu-b-85.vcf	ebi-a-GCST90001866	CD3 on CD39+ CD8+ T cell	id:ebi-a-GCST90001866	81	0.0247278	0.0791365	0.755497	-0.13038	0.179835	1.02504	0.877762	1.19702
ieu-b-85.vcf	ebi-a-GCST90001596	CD8dim T cell Absolute Count	id:ebi-a-GCST90001596	100	-0.0696862	0.0308626	0.0239486	-0.130177	-0.0091956	0.932686	0.87794	0.990847
ieu-b-85.vcf	ebi-a-GCST90001596	CD8dim T cell Absolute Count	id:ebi-a-GCST90001596	100	-0.125873	0.0629966	0.0484768	-0.249347	-0.00240023	0.881726	0.77931	0.997603
ieu-b-85.vcf	ebi-a-GCST90001596	CD8dim T cell Absolute Count	id:ebi-a-GCST90001596	100	-0.0835939	0.0462166	0.0704907	-0.174178	0.00699051	0.919805	0.840147	1.00702
ieu-b-85.vcf	ebi-a-GCST90001596	CD8dim T cell Absolute Count	id:ebi-a-GCST90001596	100	-0.0408368	0.0748328	0.586495	-0.187509	0.105836	0.959986	0.829021	1.11164
ieu-b-85.vcf	ebi-a-GCST90001871	HVEM on T cell	id:ebi-a-GCST90001871	57	0.0238862	0.0625659	0.702627	-0.098743	0.146515	1.02417	0.905976	1.15779
ieu-b-85.vcf	ebi-a-GCST90001871	HVEM on T cell	id:ebi-a-GCST90001871	57	0.0586751	0.12465	0.639703	-0.185638	0.302989	1.06043	0.830574	1.3539
ieu-b-85.vcf	ebi-a-GCST90001871	HVEM on T cell	id:ebi-a-GCST90001871	57	-0.00757007	0.0890484	0.932253	-0.182105	0.166965	0.992459	0.833514	1.18171
ieu-b-85.vcf	ebi-a-GCST90001871	HVEM on T cell	id:ebi-a-GCST90001871	57	-0.0078234	0.101244	0.938682	-0.206261	0.190614	0.992207	0.813621	1.20999
ieu-b-85.vcf	ebi-a-GCST90002025	CD4 on Effector Memory CD4+ T cell	id:ebi-a-GCST90002025	84	-0.0191691	0.0376948	0.611078	-0.093051	0.0547127	0.981013	0.911147	1.05624
ieu-b-85.vcf	ebi-a-GCST90002025	CD4 on Effector Memory CD4+ T cell	id:ebi-a-GCST90002025	84	-0.014472	0.0758604	0.849177	-0.163158	0.134214	0.985632	0.849457	1.14364
ieu-b-85.vcf	ebi-a-GCST90002025	CD4 on Effector Memory CD4+ T cell	id:ebi-a-GCST90002025	84	-0.0121429	0.055627	0.827202	-0.121172	0.096886	0.987931	0.885882	1.10173
ieu-b-85.vcf	ebi-a-GCST90002025	CD4 on Effector Memory CD4+ T cell	id:ebi-a-GCST90002025	84	0.00672713	0.0722418	0.926033	-0.134867	0.148321	1.00675	0.873832	1.15989
ieu-b-85.vcf	ebi-a-GCST90002121	CD8 on CD39+ CD8+ T cell	id:ebi-a-GCST90002121	96	0.00111431	0.0353841	0.974877	-0.0682386	0.0704672	1.00111	0.934038	1.07301
ieu-b-85.vcf	ebi-a-GCST90002121	CD8 on CD39+ CD8+ T cell	id:ebi-a-GCST90002121	96	0.00400259	0.0713781	0.9554	-0.135899	0.143904	1.00401	0.872931	1.15477
ieu-b-85.vcf	ebi-a-GCST90002121	CD8 on CD39+ CD8+ T cell	id:ebi-a-GCST90002121	96	-0.0340125	0.0558784	0.542731	-0.143534	0.0755092	0.966559	0.866291	1.07843
ieu-b-85.vcf	ebi-a-GCST90002121	CD8 on CD39+ CD8+ T cell	id:ebi-a-GCST90002121	96	-0.0938717	0.0766954	0.223996	-0.244195	0.0564513	0.9104	0.783335	1.05808
ieu-b-85.vcf	ebi-a-GCST90001491	CD39+ activated CD4 regulatory T cell %CD4 regulatory T cell	id:ebi-a-GCST90001491	100	0.0221751	0.032424	0.494031	-0.0413759	0.0857261	1.02242	0.959468	1.08951
ieu-b-85.vcf	ebi-a-GCST90001491	CD39+ activated CD4 regulatory T cell %CD4 regulatory T cell	id:ebi-a-GCST90001491	100	0.035337	0.0644943	0.585001	-0.0910719	0.161746	1.03597	0.912952	1.17556
ieu-b-85.vcf	ebi-a-GCST90001491	CD39+ activated CD4 regulatory T cell %CD4 regulatory T cell	id:ebi-a-GCST90001491	100	0.0472623	0.0507706	0.351905	-0.052248	0.146773	1.0484	0.949093	1.15809
ieu-b-85.vcf	ebi-a-GCST90001491	CD39+ activated CD4 regulatory T cell %CD4 regulatory T cell	id:ebi-a-GCST90001491	100	0.0802012	0.0783844	0.308718	-0.0734323	0.233835	1.08351	0.929199	1.26344
ieu-b-85.vcf	ebi-a-GCST90001535	CD45RA- CD4+ T cell %CD4+ T cell	id:ebi-a-GCST90001535	93	0.0169783	0.0307081	0.580338	-0.0432097	0.0771662	1.01712	0.957711	1.08022
ieu-b-85.vcf	ebi-a-GCST90001535	CD45RA- CD4+ T cell %CD4+ T cell	id:ebi-a-GCST90001535	93	0.0185765	0.0621942	0.765861	-0.103324	0.140477	1.01875	0.901835	1.15082
ieu-b-85.vcf	ebi-a-GCST90001535	CD45RA- CD4+ T cell %CD4+ T cell	id:ebi-a-GCST90001535	93	0.00414069	0.0466868	0.929328	-0.0873654	0.0956468	1.00415	0.916342	1.10037
ieu-b-85.vcf	ebi-a-GCST90001535	CD45RA- CD4+ T cell %CD4+ T cell	id:ebi-a-GCST90001535	93	-0.0380979	0.0651357	0.560047	-0.165764	0.0895681	0.962619	0.847246	1.0937
ieu-b-85.vcf	ebi-a-GCST90001818	CD38 on IgD+ B cell	id:ebi-a-GCST90001818	85	0.0274845	0.0333731	0.410194	-0.0379268	0.0928959	1.02787	0.962783	1.09735
ieu-b-85.vcf	ebi-a-GCST90001818	CD38 on IgD+ B cell	id:ebi-a-GCST90001818	85	-0.0167114	0.0682471	0.807164	-0.150476	0.117053	0.983427	0.860299	1.12418
ieu-b-85.vcf	ebi-a-GCST90001818	CD38 on IgD+ B cell	id:ebi-a-GCST90001818	85	0.029126	0.0519339	0.574914	-0.0726644	0.130916	1.02955	0.929913	1.13987
ieu-b-85.vcf	ebi-a-GCST90001818	CD38 on IgD+ B cell	id:ebi-a-GCST90001818	85	0.0158829	0.0743538	0.831367	-0.129851	0.161616	1.01601	0.878227	1.17541
ieu-b-85.vcf	ebi-a-GCST90001917	CD45 on CD8+ T cell	id:ebi-a-GCST90001917	98	-0.0182879	0.0320545	0.568321	-0.0811147	0.0445389	0.981878	0.922088	1.04555
ieu-b-85.vcf	ebi-a-GCST90001917	CD45 on CD8+ T cell	id:ebi-a-GCST90001917	98	-0.000857934	0.0653784	0.989557	-0.129	0.127284	0.999142	0.878974	1.13574
ieu-b-85.vcf	ebi-a-GCST90001917	CD45 on CD8+ T cell	id:ebi-a-GCST90001917	98	-0.00755602	0.046802	0.871742	-0.0992879	0.0841758	0.992472	0.905482	1.08782
ieu-b-85.vcf	ebi-a-GCST90001917	CD45 on CD8+ T cell	id:ebi-a-GCST90001917	98	0.00540483	0.0621321	0.930859	-0.116374	0.127184	1.00542	0.890142	1.13563
ieu-b-85.vcf	ebi-a-GCST90001959	CD4 on HLA DR+ CD4+ T cell	id:ebi-a-GCST90001959	86	-0.0131266	0.0352568	0.70966	-0.0822299	0.0559768	0.986959	0.92106	1.05757
ieu-b-85.vcf	ebi-a-GCST90001959	CD4 on HLA DR+ CD4+ T cell	id:ebi-a-GCST90001959	86	-0.0467508	0.0705395	0.509298	-0.185008	0.0915066	0.954325	0.831097	1.09582
ieu-b-85.vcf	ebi-a-GCST90001959	CD4 on HLA DR+ CD4+ T cell	id:ebi-a-GCST90001959	86	0.0211356	0.055085	0.701208	-0.0868311	0.129102	1.02136	0.916832	1.13781
ieu-b-85.vcf	ebi-a-GCST90001959	CD4 on HLA DR+ CD4+ T cell	id:ebi-a-GCST90001959	86	-0.0125901	0.0725	0.862548	-0.15469	0.12951	0.987489	0.856681	1.13827
ieu-b-85.vcf	ebi-a-GCST90002085	SSC-A on HLA DR+ CD4+ T cell	id:ebi-a-GCST90002085	94	0.00326931	0.0343656	0.924209	-0.0640872	0.0706258	1.00327	0.937923	1.07318
ieu-b-85.vcf	ebi-a-GCST90002085	SSC-A on HLA DR+ CD4+ T cell	id:ebi-a-GCST90002085	94	-0.00723508	0.0699087	0.917797	-0.144256	0.129786	0.992791	0.865666	1.13858
ieu-b-85.vcf	ebi-a-GCST90002085	SSC-A on HLA DR+ CD4+ T cell	id:ebi-a-GCST90002085	94	0.0363093	0.056068	0.517248	-0.0735841	0.146203	1.03698	0.929058	1.15743
ieu-b-85.vcf	ebi-a-GCST90002085	SSC-A on HLA DR+ CD4+ T cell	id:ebi-a-GCST90002085	94	0.0974265	0.104766	0.354808	-0.107915	0.302768	1.10233	0.897704	1.3536
ieu-b-85.vcf	ebi-a-GCST90001983	CD14 on CD14+ CD16+ monocyte	id:ebi-a-GCST90001983	92	0.0371095	0.032135	0.248172	-0.0258751	0.100094	1.03781	0.974457	1.10528
ieu-b-85.vcf	ebi-a-GCST90001983	CD14 on CD14+ CD16+ monocyte	id:ebi-a-GCST90001983	92	0.0654559	0.0650021	0.316644	-0.0619482	0.19286	1.06765	0.939932	1.21271
ieu-b-85.vcf	ebi-a-GCST90001983	CD14 on CD14+ CD16+ monocyte	id:ebi-a-GCST90001983	92	0.0136723	0.0483888	0.77752	-0.0811697	0.108514	1.01377	0.922037	1.11462
ieu-b-85.vcf	ebi-a-GCST90001983	CD14 on CD14+ CD16+ monocyte	id:ebi-a-GCST90001983	92	0.0819121	0.0698848	0.244216	-0.0550622	0.218886	1.08536	0.946426	1.24469
ieu-b-85.vcf	ebi-a-GCST90001635	CD8dim Natural Killer T %lymphocyte	id:ebi-a-GCST90001635	90	-0.054963	0.0327558	0.0933542	-0.119164	0.00923833	0.94652	0.887662	1.00928
ieu-b-85.vcf	ebi-a-GCST90001635	CD8dim Natural Killer T %lymphocyte	id:ebi-a-GCST90001635	90	-0.0231234	0.0667185	0.729734	-0.153892	0.107645	0.977142	0.857365	1.11365
ieu-b-85.vcf	ebi-a-GCST90001635	CD8dim Natural Killer T %lymphocyte	id:ebi-a-GCST90001635	90	-0.0450317	0.0483423	0.351586	-0.139783	0.0497192	0.955967	0.869547	1.05098
ieu-b-85.vcf	ebi-a-GCST90001635	CD8dim Natural Killer T %lymphocyte	id:ebi-a-GCST90001635	90	-0.104884	0.0779762	0.182016	-0.257718	0.0479489	0.900429	0.772813	1.04912
ieu-b-85.vcf	ebi-a-GCST90001861	CD3 on CD28+ CD4+ T cell	id:ebi-a-GCST90001861	94	0.00236091	0.0352956	0.946669	-0.0668184	0.0715403	1.00236	0.935365	1.07416
ieu-b-85.vcf	ebi-a-GCST90001861	CD3 on CD28+ CD4+ T cell	id:ebi-a-GCST90001861	94	0.0403498	0.0699263	0.565326	-0.0967057	0.177405	1.04117	0.907823	1.19412
ieu-b-85.vcf	ebi-a-GCST90001861	CD3 on CD28+ CD4+ T cell	id:ebi-a-GCST90001861	94	0.000249704	0.0512624	0.996113	-0.100225	0.100724	1.00025	0.904634	1.10597
ieu-b-85.vcf	ebi-a-GCST90001861	CD3 on CD28+ CD4+ T cell	id:ebi-a-GCST90001861	94	-0.0239133	0.0796603	0.764701	-0.180047	0.132221	0.97637	0.835231	1.14136
ieu-b-85.vcf	ebi-a-GCST90001783	CD25 on IgD+ CD38+ B cell	id:ebi-a-GCST90001783	86	0.0132475	0.0325254	0.68379	-0.0505023	0.0769972	1.01334	0.950752	1.08004
ieu-b-85.vcf	ebi-a-GCST90001783	CD25 on IgD+ CD38+ B cell	id:ebi-a-GCST90001783	86	0.0651922	0.0650025	0.318781	-0.0622128	0.192597	1.06736	0.939683	1.21239
ieu-b-85.vcf	ebi-a-GCST90001783	CD25 on IgD+ CD38+ B cell	id:ebi-a-GCST90001783	86	0.0315636	0.0489228	0.518817	-0.0643252	0.127452	1.03207	0.9377	1.13593
ieu-b-85.vcf	ebi-a-GCST90001783	CD25 on IgD+ CD38+ B cell	id:ebi-a-GCST90001783	86	0.00541828	0.0631542	0.931832	-0.118364	0.1292	1.00543	0.888373	1.13792
ieu-b-85.vcf	ebi-a-GCST90001503	Activated & secreting CD4 regulatory T cell %CD4+ T cell	id:ebi-a-GCST90001503	104	0.0190808	0.0323424	0.555217	-0.0443104	0.0824719	1.01926	0.956657	1.08597
ieu-b-85.vcf	ebi-a-GCST90001503	Activated & secreting CD4 regulatory T cell %CD4+ T cell	id:ebi-a-GCST90001503	104	0.0642513	0.0647926	0.323717	-0.0627421	0.191245	1.06636	0.939186	1.21076
ieu-b-85.vcf	ebi-a-GCST90001503	Activated & secreting CD4 regulatory T cell %CD4+ T cell	id:ebi-a-GCST90001503	104	0.00186363	0.0513862	0.971069	-0.0988534	0.102581	1.00187	0.905875	1.10803
ieu-b-85.vcf	ebi-a-GCST90001503	Activated & secreting CD4 regulatory T cell %CD4+ T cell	id:ebi-a-GCST90001503	104	-0.0235329	0.0922269	0.799106	-0.204298	0.157232	0.976742	0.81522	1.17027
ieu-b-85.vcf	ebi-a-GCST90001551	Naive CD8+ T cell Absolute Count	id:ebi-a-GCST90001551	89	0.0165872	0.0227853	0.466627	-0.028072	0.0612463	1.01673	0.972318	1.06316
ieu-b-85.vcf	ebi-a-GCST90001551	Naive CD8+ T cell Absolute Count	id:ebi-a-GCST90001551	89	0.0799262	0.0448965	0.0785293	-0.00807097	0.167923	1.08321	0.991962	1.18285
ieu-b-85.vcf	ebi-a-GCST90001551	Naive CD8+ T cell Absolute Count	id:ebi-a-GCST90001551	89	0.0137162	0.0342211	0.688559	-0.0533571	0.0807895	1.01381	0.948041	1.08414
ieu-b-85.vcf	ebi-a-GCST90001551	Naive CD8+ T cell Absolute Count	id:ebi-a-GCST90001551	89	0.0272665	0.0489059	0.578581	-0.068589	0.123122	1.02764	0.93371	1.13102
ieu-b-85.vcf	ebi-a-GCST90001759	CD20 on naive-mature B cell	id:ebi-a-GCST90001759	94	-0.00319465	0.0319817	0.920432	-0.0658788	0.0594895	0.99681	0.936244	1.06129
ieu-b-85.vcf	ebi-a-GCST90001759	CD20 on naive-mature B cell	id:ebi-a-GCST90001759	94	-0.0171766	0.06503	0.792268	-0.144635	0.110282	0.98297	0.865338	1.11659
ieu-b-85.vcf	ebi-a-GCST90001759	CD20 on naive-mature B cell	id:ebi-a-GCST90001759	94	-0.0448478	0.046861	0.338547	-0.136695	0.0469997	0.956143	0.872236	1.04812
ieu-b-85.vcf	ebi-a-GCST90001759	CD20 on naive-mature B cell	id:ebi-a-GCST90001759	94	-0.0597145	0.0635686	0.349974	-0.184309	0.06488	0.942033	0.831679	1.06703
ieu-b-85.vcf	ebi-a-GCST90001482	Resting CD4 regulatory T cell %CD4+ T cell	id:ebi-a-GCST90001482	89	-0.0226982	0.0306755	0.459334	-0.0828222	0.0374258	0.977557	0.920515	1.03813
ieu-b-85.vcf	ebi-a-GCST90001482	Resting CD4 regulatory T cell %CD4+ T cell	id:ebi-a-GCST90001482	89	-0.0416098	0.0621128	0.504691	-0.163351	0.0801313	0.959244	0.849293	1.08343
ieu-b-85.vcf	ebi-a-GCST90001482	Resting CD4 regulatory T cell %CD4+ T cell	id:ebi-a-GCST90001482	89	-0.0244648	0.0451092	0.58758	-0.112879	0.0639492	0.975832	0.893259	1.06604
ieu-b-85.vcf	ebi-a-GCST90001482	Resting CD4 regulatory T cell %CD4+ T cell	id:ebi-a-GCST90001482	89	-0.0045853	0.0616972	0.940925	-0.125512	0.116341	0.995425	0.882045	1.12338
ieu-b-85.vcf	ebi-a-GCST90002075	SSC-A on B cell	id:ebi-a-GCST90002075	94	0.0247422	0.03525	0.482737	-0.0443477	0.0938321	1.02505	0.956621	1.09838
ieu-b-85.vcf	ebi-a-GCST90002075	SSC-A on B cell	id:ebi-a-GCST90002075	94	0.104993	0.0707898	0.141447	-0.0337547	0.243741	1.1107	0.966809	1.27601
ieu-b-85.vcf	ebi-a-GCST90002075	SSC-A on B cell	id:ebi-a-GCST90002075	94	0.040616	0.0546129	0.457054	-0.0664253	0.147657	1.04145	0.935733	1.15912
ieu-b-85.vcf	ebi-a-GCST90002075	SSC-A on B cell	id:ebi-a-GCST90002075	94	0.143768	0.102245	0.16302	-0.056631	0.344168	1.15462	0.944943	1.41082
ieu-b-85.vcf	ebi-a-GCST90001873	HVEM on Effector Memory CD8+ T cell	id:ebi-a-GCST90001873	62	0.00208708	0.0608802	0.972652	-0.117238	0.121412	1.00209	0.889373	1.12909
ieu-b-85.vcf	ebi-a-GCST90001873	HVEM on Effector Memory CD8+ T cell	id:ebi-a-GCST90001873	62	-0.020657	0.120663	0.864645	-0.257156	0.215842	0.979555	0.773248	1.24091
ieu-b-85.vcf	ebi-a-GCST90001873	HVEM on Effector Memory CD8+ T cell	id:ebi-a-GCST90001873	62	0.0348938	0.086375	0.686227	-0.134401	0.204189	1.03551	0.874239	1.22653
ieu-b-85.vcf	ebi-a-GCST90001873	HVEM on Effector Memory CD8+ T cell	id:ebi-a-GCST90001873	62	0.0901566	0.102448	0.382301	-0.110642	0.290955	1.09435	0.89526	1.3377
ieu-b-85.vcf	ebi-a-GCST90002055	CD8 on naive CD8+ T cell	id:ebi-a-GCST90002055	82	-0.00827557	0.0376044	0.825817	-0.0819801	0.065429	0.991759	0.92129	1.06762
ieu-b-85.vcf	ebi-a-GCST90002055	CD8 on naive CD8+ T cell	id:ebi-a-GCST90002055	82	-0.000810219	0.0752018	0.991431	-0.148206	0.146585	0.99919	0.862254	1.15787
ieu-b-85.vcf	ebi-a-GCST90002055	CD8 on naive CD8+ T cell	id:ebi-a-GCST90002055	82	0.0102457	0.0570404	0.85745	-0.101554	0.122045	1.0103	0.903433	1.1298
ieu-b-85.vcf	ebi-a-GCST90002055	CD8 on naive CD8+ T cell	id:ebi-a-GCST90002055	82	-0.0122257	0.0768473	0.873994	-0.162846	0.138395	0.987849	0.849722	1.14843
ieu-b-85.vcf	ebi-a-GCST90001997	CX3CR1 on CD14+ CD16- monocyte	id:ebi-a-GCST90001997	89	-0.0765251	0.0333168	0.0216249	-0.141826	-0.0112242	0.92633	0.867772	0.988839
ieu-b-85.vcf	ebi-a-GCST90001997	CX3CR1 on CD14+ CD16- monocyte	id:ebi-a-GCST90001997	89	-0.138457	0.0672001	0.0423504	-0.270169	-0.00674481	0.870701	0.76325	0.993278
ieu-b-85.vcf	ebi-a-GCST90001997	CX3CR1 on CD14+ CD16- monocyte	id:ebi-a-GCST90001997	89	-0.0995882	0.0499782	0.0463017	-0.197546	-0.00163093	0.90521	0.820743	0.99837
ieu-b-85.vcf	ebi-a-GCST90001997	CX3CR1 on CD14+ CD16- monocyte	id:ebi-a-GCST90001997	89	-0.111879	0.0633751	0.080974	-0.236094	0.012336	0.894152	0.789706	1.01241
ieu-b-85.vcf	ebi-a-GCST90002109	HLA DR on CD33+ HLA DR+ CD14dim	id:ebi-a-GCST90002109	81	-0.00899804	0.0505885	0.858827	-0.108152	0.0901555	0.991042	0.897492	1.09434
ieu-b-85.vcf	ebi-a-GCST90002109	HLA DR on CD33+ HLA DR+ CD14dim	id:ebi-a-GCST90002109	81	-0.0235128	0.0994904	0.813786	-0.218514	0.171488	0.976761	0.803712	1.18707
ieu-b-85.vcf	ebi-a-GCST90002109	HLA DR on CD33+ HLA DR+ CD14dim	id:ebi-a-GCST90002109	81	-0.0365422	0.0691539	0.597209	-0.172084	0.0989994	0.964117	0.841909	1.10407
ieu-b-85.vcf	ebi-a-GCST90002109	HLA DR on CD33+ HLA DR+ CD14dim	id:ebi-a-GCST90002109	81	-0.0587353	0.0927484	0.52836	-0.240522	0.123052	0.942956	0.786217	1.13094
ieu-b-85.vcf	ebi-a-GCST90001915	CD45 on T cell	id:ebi-a-GCST90001915	95	-0.0163849	0.0343947	0.633806	-0.0837986	0.0510288	0.983749	0.919616	1.05235
ieu-b-85.vcf	ebi-a-GCST90001915	CD45 on T cell	id:ebi-a-GCST90001915	95	0.024286	0.070137	0.729925	-0.113183	0.161755	1.02458	0.892988	1.17557
ieu-b-85.vcf	ebi-a-GCST90001915	CD45 on T cell	id:ebi-a-GCST90001915	95	-0.00856702	0.0507658	0.865989	-0.108068	0.090934	0.99147	0.897567	1.0952
ieu-b-85.vcf	ebi-a-GCST90001915	CD45 on T cell	id:ebi-a-GCST90001915	95	0.0176292	0.0677094	0.795151	-0.115081	0.15034	1.01779	0.891294	1.16223
ieu-b-85.vcf	ebi-a-GCST90001524	Granulocytic Myeloid-Derived Suppressor Cells Absolute Count	id:ebi-a-GCST90001524	75	0.0148401	0.0441853	0.736976	-0.0717631	0.101443	1.01495	0.930751	1.10677
ieu-b-85.vcf	ebi-a-GCST90001524	Granulocytic Myeloid-Derived Suppressor Cells Absolute Count	id:ebi-a-GCST90001524	75	0.0447227	0.0866521	0.607332	-0.125115	0.214561	1.04574	0.882395	1.23932
ieu-b-85.vcf	ebi-a-GCST90001524	Granulocytic Myeloid-Derived Suppressor Cells Absolute Count	id:ebi-a-GCST90001524	75	-0.0426388	0.0653066	0.513819	-0.17064	0.0853621	0.958257	0.843125	1.08911
ieu-b-85.vcf	ebi-a-GCST90001524	Granulocytic Myeloid-Derived Suppressor Cells Absolute Count	id:ebi-a-GCST90001524	75	-0.0789482	0.0831395	0.345413	-0.241902	0.0840052	0.924088	0.785133	1.08763
ieu-b-85.vcf	ebi-a-GCST90001931	CD127 on CD4+ T cell	id:ebi-a-GCST90001931	25	-0.103561	0.0711421	0.145479	-0.242999	0.0358778	0.901621	0.784272	1.03653
ieu-b-85.vcf	ebi-a-GCST90001931	CD127 on CD4+ T cell	id:ebi-a-GCST90001931	25	-0.122351	0.1661	0.468807	-0.447907	0.203205	0.884838	0.638964	1.22532
ieu-b-85.vcf	ebi-a-GCST90001931	CD127 on CD4+ T cell	id:ebi-a-GCST90001931	25	-0.207913	0.10773	0.0536133	-0.419064	0.00323755	0.812278	0.657662	1.00324
ieu-b-85.vcf	ebi-a-GCST90001931	CD127 on CD4+ T cell	id:ebi-a-GCST90001931	25	-0.279445	0.144651	0.0652672	-0.562961	0.00407161	0.756203	0.56952	1.00408
ieu-b-85.vcf	ebi-a-GCST90001930	CD127 on CD28- CD8+ T cell	id:ebi-a-GCST90001930	80	0.00346779	0.0385048	0.928238	-0.0720015	0.0789371	1.00347	0.930529	1.08214
ieu-b-85.vcf	ebi-a-GCST90001930	CD127 on CD28- CD8+ T cell	id:ebi-a-GCST90001930	80	0.115109	0.0780952	0.144518	-0.0379578	0.268175	1.122	0.962754	1.30758
ieu-b-85.vcf	ebi-a-GCST90001930	CD127 on CD28- CD8+ T cell	id:ebi-a-GCST90001930	80	0.0547281	0.0574547	0.340821	-0.0578831	0.167339	1.05625	0.94376	1.18216
ieu-b-85.vcf	ebi-a-GCST90001930	CD127 on CD28- CD8+ T cell	id:ebi-a-GCST90001930	80	0.0625896	0.0854253	0.465921	-0.104844	0.230023	1.06459	0.900465	1.25863
ieu-b-85.vcf	ebi-a-GCST90001755	CD20 on IgD- CD38- B cell	id:ebi-a-GCST90001755	93	0.0257139	0.032378	0.427092	-0.037747	0.0891748	1.02605	0.962957	1.09327
ieu-b-85.vcf	ebi-a-GCST90001755	CD20 on IgD- CD38- B cell	id:ebi-a-GCST90001755	93	0.0275245	0.0654965	0.675298	-0.100849	0.155898	1.02791	0.90407	1.16871
ieu-b-85.vcf	ebi-a-GCST90001755	CD20 on IgD- CD38- B cell	id:ebi-a-GCST90001755	93	-0.0124379	0.0471009	0.791727	-0.104756	0.0798799	0.987639	0.900544	1.08316
ieu-b-85.vcf	ebi-a-GCST90001755	CD20 on IgD- CD38- B cell	id:ebi-a-GCST90001755	93	-0.0369106	0.0661649	0.578296	-0.166594	0.0927726	0.963762	0.846543	1.09721
ieu-b-85.vcf	ebi-a-GCST90002116	HLA DR on B cell	id:ebi-a-GCST90002116	82	0.00609389	0.0359934	0.865556	-0.0644531	0.0766409	1.00611	0.93758	1.07965
ieu-b-85.vcf	ebi-a-GCST90002116	HLA DR on B cell	id:ebi-a-GCST90002116	82	-0.0215163	0.0710373	0.762762	-0.16075	0.117717	0.978713	0.851505	1.12493
ieu-b-85.vcf	ebi-a-GCST90002116	HLA DR on B cell	id:ebi-a-GCST90002116	82	0.0446283	0.0548223	0.415614	-0.0628234	0.15208	1.04564	0.939109	1.16425
ieu-b-85.vcf	ebi-a-GCST90002116	HLA DR on B cell	id:ebi-a-GCST90002116	82	0.0648693	0.0849509	0.447318	-0.101634	0.231373	1.06702	0.90336	1.26033
ieu-b-85.vcf	ebi-a-GCST90001512	CD25++ CD45RA- CD4 not regulatory T cell %T cell	id:ebi-a-GCST90001512	92	0.021125	0.0332353	0.525024	-0.0440161	0.0862662	1.02135	0.956939	1.0901
ieu-b-85.vcf	ebi-a-GCST90001512	CD25++ CD45RA- CD4 not regulatory T cell %T cell	id:ebi-a-GCST90001512	92	0.016493	0.0663345	0.804211	-0.113523	0.146508	1.01663	0.892684	1.15778
ieu-b-85.vcf	ebi-a-GCST90001512	CD25++ CD45RA- CD4 not regulatory T cell %T cell	id:ebi-a-GCST90001512	92	0.0427602	0.0477178	0.370196	-0.0507666	0.136287	1.04369	0.9505	1.14601
ieu-b-85.vcf	ebi-a-GCST90001512	CD25++ CD45RA- CD4 not regulatory T cell %T cell	id:ebi-a-GCST90001512	92	0.0760815	0.0798005	0.342915	-0.0803276	0.232491	1.07905	0.922814	1.26174
ieu-b-85.vcf	ebi-a-GCST90001605	T cell %leukocyte	id:ebi-a-GCST90001605	92	0.0134458	0.0317564	0.672	-0.0487967	0.0756884	1.01354	0.952375	1.07863
ieu-b-85.vcf	ebi-a-GCST90001605	T cell %leukocyte	id:ebi-a-GCST90001605	92	-0.0279556	0.0629927	0.658258	-0.151421	0.09551	0.972431	0.859485	1.10022
ieu-b-85.vcf	ebi-a-GCST90001605	T cell %leukocyte	id:ebi-a-GCST90001605	92	0.00978123	0.048324	0.839597	-0.0849338	0.104496	1.00983	0.918573	1.11015
ieu-b-85.vcf	ebi-a-GCST90001605	T cell %leukocyte	id:ebi-a-GCST90001605	92	-0.0029972	0.0695101	0.965701	-0.139237	0.133243	0.997007	0.870022	1.14253
ieu-b-85.vcf	ebi-a-GCST90002103	CD45RA on CD39+ resting CD4 regulatory T cell	id:ebi-a-GCST90002103	22	-0.0218117	0.081323	0.788537	-0.181205	0.137581	0.978424	0.834264	1.1475
ieu-b-85.vcf	ebi-a-GCST90002103	CD45RA on CD39+ resting CD4 regulatory T cell	id:ebi-a-GCST90002103	22	-0.051751	0.199494	0.79797	-0.44276	0.339258	0.949565	0.642261	1.40391
ieu-b-85.vcf	ebi-a-GCST90002103	CD45RA on CD39+ resting CD4 regulatory T cell	id:ebi-a-GCST90002103	22	-0.0238497	0.110673	0.82938	-0.24077	0.19307	0.976432	0.786023	1.21297
ieu-b-85.vcf	ebi-a-GCST90002103	CD45RA on CD39+ resting CD4 regulatory T cell	id:ebi-a-GCST90002103	22	0.0101661	0.149385	0.946387	-0.282629	0.302961	1.01022	0.753799	1.35386
ieu-b-85.vcf	ebi-a-GCST90001613	CD4-CD8- T cell %leukocyte	id:ebi-a-GCST90001613	98	-0.0456015	0.0304915	0.134771	-0.105365	0.0141618	0.955423	0.899996	1.01426
ieu-b-85.vcf	ebi-a-GCST90001613	CD4-CD8- T cell %leukocyte	id:ebi-a-GCST90001613	98	-0.0755457	0.0623509	0.228631	-0.197753	0.046662	0.927237	0.820572	1.04777
ieu-b-85.vcf	ebi-a-GCST90001613	CD4-CD8- T cell %leukocyte	id:ebi-a-GCST90001613	98	-0.0531041	0.0481664	0.270239	-0.14751	0.0413021	0.948281	0.862853	1.04217
ieu-b-85.vcf	ebi-a-GCST90001613	CD4-CD8- T cell %leukocyte	id:ebi-a-GCST90001613	98	-0.0453588	0.0692424	0.513972	-0.181074	0.0903563	0.955655	0.834374	1.09456
ieu-b-85.vcf	ebi-a-GCST90001636	CD4-CD8- Natural Killer T Absolute Count	id:ebi-a-GCST90001636	25	-0.0900011	0.0627113	0.15124	-0.212915	0.0329131	0.91393	0.808225	1.03346
ieu-b-85.vcf	ebi-a-GCST90001636	CD4-CD8- Natural Killer T Absolute Count	id:ebi-a-GCST90001636	25	-0.162344	0.14827	0.284883	-0.452953	0.128264	0.850148	0.635748	1.13685
ieu-b-85.vcf	ebi-a-GCST90001636	CD4-CD8- Natural Killer T Absolute Count	id:ebi-a-GCST90001636	25	-0.152516	0.0909892	0.0936989	-0.330855	0.0258227	0.858545	0.718309	1.02616
ieu-b-85.vcf	ebi-a-GCST90001636	CD4-CD8- Natural Killer T Absolute Count	id:ebi-a-GCST90001636	25	-0.201217	0.135527	0.150639	-0.46685	0.0644153	0.817735	0.626974	1.06654
ieu-b-85.vcf	ebi-a-GCST90001936	CD25 on CD4 regulatory T cell	id:ebi-a-GCST90001936	91	0.0472429	0.0332339	0.155163	-0.0178955	0.112381	1.04838	0.982264	1.11894
ieu-b-85.vcf	ebi-a-GCST90001936	CD25 on CD4 regulatory T cell	id:ebi-a-GCST90001936	91	0.111523	0.0671653	0.100348	-0.0201208	0.243167	1.11798	0.98008	1.27528
ieu-b-85.vcf	ebi-a-GCST90001936	CD25 on CD4 regulatory T cell	id:ebi-a-GCST90001936	91	0.0714533	0.048977	0.144589	-0.0245417	0.167448	1.07407	0.975757	1.18228
ieu-b-85.vcf	ebi-a-GCST90001936	CD25 on CD4 regulatory T cell	id:ebi-a-GCST90001936	91	0.0730517	0.0615175	0.238158	-0.0475227	0.193626	1.07579	0.953589	1.21364
ieu-b-85.vcf	ebi-a-GCST90001543	Effector Memory CD4+ T cell %CD4+ T cell	id:ebi-a-GCST90001543	92	0.00338104	0.0313588	0.91414	-0.0580823	0.0648443	1.00339	0.943572	1.06699
ieu-b-85.vcf	ebi-a-GCST90001543	Effector Memory CD4+ T cell %CD4+ T cell	id:ebi-a-GCST90001543	92	0.00464149	0.0628041	0.941251	-0.118454	0.127737	1.00465	0.888292	1.13625
ieu-b-85.vcf	ebi-a-GCST90001543	Effector Memory CD4+ T cell %CD4+ T cell	id:ebi-a-GCST90001543	92	0.0228561	0.047563	0.630841	-0.0703674	0.11608	1.02312	0.932051	1.12309
ieu-b-85.vcf	ebi-a-GCST90001543	Effector Memory CD4+ T cell %CD4+ T cell	id:ebi-a-GCST90001543	92	0.0254771	0.0644224	0.693422	-0.100791	0.151745	1.0258	0.904122	1.16386
ieu-b-85.vcf	ebi-a-GCST90001840	CD3 on Terminally Differentiated CD8+ T cell	id:ebi-a-GCST90001840	89	0.0461497	0.036232	0.20276	-0.024865	0.117164	1.04723	0.975442	1.1243
ieu-b-85.vcf	ebi-a-GCST90001840	CD3 on Terminally Differentiated CD8+ T cell	id:ebi-a-GCST90001840	89	0.0716746	0.0723945	0.324893	-0.0702186	0.213568	1.07431	0.93219	1.23809
ieu-b-85.vcf	ebi-a-GCST90001840	CD3 on Terminally Differentiated CD8+ T cell	id:ebi-a-GCST90001840	89	0.074255	0.051112	0.146282	-0.0259245	0.174435	1.07708	0.974409	1.19057
ieu-b-85.vcf	ebi-a-GCST90001840	CD3 on Terminally Differentiated CD8+ T cell	id:ebi-a-GCST90001840	89	0.0688089	0.0702407	0.329962	-0.0688629	0.206481	1.07123	0.933455	1.22934
ieu-b-85.vcf	ebi-a-GCST90001640	CD3- lymphocyte %lymphocyte	id:ebi-a-GCST90001640	47	-0.0045242	0.0432235	0.916638	-0.0892424	0.080194	0.995486	0.914624	1.0835
ieu-b-85.vcf	ebi-a-GCST90001640	CD3- lymphocyte %lymphocyte	id:ebi-a-GCST90001640	47	-0.0909429	0.0897431	0.316302	-0.266839	0.0849536	0.91307	0.765796	1.08867
ieu-b-85.vcf	ebi-a-GCST90001640	CD3- lymphocyte %lymphocyte	id:ebi-a-GCST90001640	47	-0.0324627	0.0645108	0.614815	-0.158904	0.0939785	0.968059	0.853078	1.09854
ieu-b-85.vcf	ebi-a-GCST90001640	CD3- lymphocyte %lymphocyte	id:ebi-a-GCST90001640	47	-0.0782663	0.0802222	0.334357	-0.235502	0.0789693	0.924718	0.790174	1.08217
ieu-b-85.vcf	ebi-a-GCST90001789	CD25 on IgD- CD38dim B cell	id:ebi-a-GCST90001789	93	-0.0078915	0.0315612	0.802558	-0.0697515	0.0539685	0.99214	0.932626	1.05545
ieu-b-85.vcf	ebi-a-GCST90001789	CD25 on IgD- CD38dim B cell	id:ebi-a-GCST90001789	93	-0.00274894	0.0639337	0.965798	-0.128059	0.122561	0.997255	0.879801	1.13039
ieu-b-85.vcf	ebi-a-GCST90001789	CD25 on IgD- CD38dim B cell	id:ebi-a-GCST90001789	93	0.0321905	0.0486918	0.508544	-0.0632455	0.127626	1.03271	0.938713	1.13613
ieu-b-85.vcf	ebi-a-GCST90001789	CD25 on IgD- CD38dim B cell	id:ebi-a-GCST90001789	93	0.0757038	0.0799557	0.34621	-0.0810094	0.232417	1.07864	0.922185	1.26165
ieu-b-85.vcf	ebi-a-GCST90001928	CD127 on CD28+ CD45RA- CD8+ T cell	id:ebi-a-GCST90001928	92	-0.0164414	0.0353371	0.641737	-0.0857021	0.0528194	0.983693	0.917868	1.05424
ieu-b-85.vcf	ebi-a-GCST90001928	CD127 on CD28+ CD45RA- CD8+ T cell	id:ebi-a-GCST90001928	92	0.055825	0.0713916	0.436294	-0.0841025	0.195752	1.05741	0.919337	1.21623
ieu-b-85.vcf	ebi-a-GCST90001928	CD127 on CD28+ CD45RA- CD8+ T cell	id:ebi-a-GCST90001928	92	-0.026681	0.0571164	0.640404	-0.138629	0.0852672	0.973672	0.870551	1.08901
ieu-b-85.vcf	ebi-a-GCST90001928	CD127 on CD28+ CD45RA- CD8+ T cell	id:ebi-a-GCST90001928	92	-0.101035	0.116468	0.387955	-0.329313	0.127243	0.903901	0.719418	1.13569
ieu-b-85.vcf	ebi-a-GCST90001753	CD20 on IgD- CD24- B cell	id:ebi-a-GCST90001753	97	0.00311269	0.0317977	0.922019	-0.0592109	0.0654362	1.00312	0.942508	1.06762
ieu-b-85.vcf	ebi-a-GCST90001753	CD20 on IgD- CD24- B cell	id:ebi-a-GCST90001753	97	-0.00929865	0.0643733	0.885452	-0.13547	0.116873	0.990744	0.873305	1.12398
ieu-b-85.vcf	ebi-a-GCST90001753	CD20 on IgD- CD24- B cell	id:ebi-a-GCST90001753	97	-0.0186166	0.046656	0.689879	-0.110062	0.0728291	0.981556	0.895778	1.07555
ieu-b-85.vcf	ebi-a-GCST90001753	CD20 on IgD- CD24- B cell	id:ebi-a-GCST90001753	97	-0.0105396	0.0655276	0.872556	-0.138974	0.117895	0.989516	0.870251	1.12513
ieu-b-85.vcf	ebi-a-GCST90001844	CD3 on Terminally Differentiated CD4+ T cell	id:ebi-a-GCST90001844	88	0.0254819	0.036489	0.484962	-0.0460366	0.0970003	1.02581	0.955007	1.10186
ieu-b-85.vcf	ebi-a-GCST90001844	CD3 on Terminally Differentiated CD4+ T cell	id:ebi-a-GCST90001844	88	0.106674	0.0723759	0.144165	-0.0351832	0.24853	1.11257	0.965429	1.28214
ieu-b-85.vcf	ebi-a-GCST90001844	CD3 on Terminally Differentiated CD4+ T cell	id:ebi-a-GCST90001844	88	0.0216844	0.0576738	0.706929	-0.0913562	0.134725	1.02192	0.912693	1.14422
ieu-b-85.vcf	ebi-a-GCST90001844	CD3 on Terminally Differentiated CD4+ T cell	id:ebi-a-GCST90001844	88	0.021463	0.0715059	0.764773	-0.118688	0.161615	1.0217	0.888084	1.17541
ieu-b-85.vcf	ebi-a-GCST90001839	CD3 on Effector Memory CD8+ T cell	id:ebi-a-GCST90001839	89	0.0293822	0.0361758	0.416674	-0.0415224	0.100287	1.02982	0.959328	1.10549
ieu-b-85.vcf	ebi-a-GCST90001839	CD3 on Effector Memory CD8+ T cell	id:ebi-a-GCST90001839	89	0.0565533	0.0730602	0.440991	-0.0866446	0.199751	1.05818	0.917003	1.2211
ieu-b-85.vcf	ebi-a-GCST90001839	CD3 on Effector Memory CD8+ T cell	id:ebi-a-GCST90001839	89	0.0467959	0.0552422	0.396937	-0.0614788	0.155071	1.04791	0.940373	1.16774
ieu-b-85.vcf	ebi-a-GCST90001839	CD3 on Effector Memory CD8+ T cell	id:ebi-a-GCST90001839	89	0.108101	0.0805298	0.182926	-0.049737	0.26594	1.11416	0.95148	1.30466
ieu-b-85.vcf	ebi-a-GCST90001676	CD28- CD25++ CD8+ T cell %T cell	id:ebi-a-GCST90001676	22	-0.118947	0.0677856	0.0793006	-0.251807	0.0139124	0.887854	0.777395	1.01401
ieu-b-85.vcf	ebi-a-GCST90001676	CD28- CD25++ CD8+ T cell %T cell	id:ebi-a-GCST90001676	22	-0.208315	0.163432	0.217053	-0.528642	0.112013	0.811951	0.589405	1.11853
ieu-b-85.vcf	ebi-a-GCST90001676	CD28- CD25++ CD8+ T cell %T cell	id:ebi-a-GCST90001676	22	-0.0697322	0.0927101	0.451959	-0.251444	0.11198	0.932644	0.777677	1.11849
ieu-b-85.vcf	ebi-a-GCST90001676	CD28- CD25++ CD8+ T cell %T cell	id:ebi-a-GCST90001676	22	-0.065695	0.138838	0.640968	-0.337817	0.206427	0.936416	0.713326	1.22928
ieu-b-85.vcf	ebi-a-GCST90001643	B cell %CD3- lymphocyte	id:ebi-a-GCST90001643	101	0.0255308	0.0303256	0.39985	-0.0339074	0.0849691	1.02586	0.966661	1.08868
ieu-b-85.vcf	ebi-a-GCST90001643	B cell %CD3- lymphocyte	id:ebi-a-GCST90001643	101	0.0528205	0.0622788	0.398411	-0.0692459	0.174887	1.05424	0.933097	1.19111
ieu-b-85.vcf	ebi-a-GCST90001643	B cell %CD3- lymphocyte	id:ebi-a-GCST90001643	101	0.0344038	0.0493412	0.485638	-0.062305	0.131113	1.035	0.939596	1.1401
ieu-b-85.vcf	ebi-a-GCST90001643	B cell %CD3- lymphocyte	id:ebi-a-GCST90001643	101	-0.0402922	0.104376	0.700297	-0.24487	0.164286	0.960509	0.782806	1.17855
ieu-b-85.vcf	ebi-a-GCST90001974	FSC-A on CD8+ T cell	id:ebi-a-GCST90001974	94	0.0103081	0.0309074	0.738746	-0.0502705	0.0708866	1.01036	0.950972	1.07346
ieu-b-85.vcf	ebi-a-GCST90001974	FSC-A on CD8+ T cell	id:ebi-a-GCST90001974	94	-0.0116573	0.0643223	0.856583	-0.137729	0.114414	0.98841	0.871335	1.12122
ieu-b-85.vcf	ebi-a-GCST90001974	FSC-A on CD8+ T cell	id:ebi-a-GCST90001974	94	0.031441	0.0460064	0.494352	-0.0587317	0.121614	1.03194	0.94296	1.12932
ieu-b-85.vcf	ebi-a-GCST90001974	FSC-A on CD8+ T cell	id:ebi-a-GCST90001974	94	0.0538346	0.0679952	0.430527	-0.0794361	0.187105	1.05531	0.923637	1.20575
ieu-b-85.vcf	ebi-a-GCST90001981	CD40 on CD14+ CD16+ monocyte	id:ebi-a-GCST90001981	102	0.0307532	0.0317042	0.332044	-0.031387	0.0928934	1.03123	0.9691	1.09734
ieu-b-85.vcf	ebi-a-GCST90001981	CD40 on CD14+ CD16+ monocyte	id:ebi-a-GCST90001981	102	0.0153238	0.0649678	0.814018	-0.112013	0.142661	1.01544	0.894033	1.15334
ieu-b-85.vcf	ebi-a-GCST90001981	CD40 on CD14+ CD16+ monocyte	id:ebi-a-GCST90001981	102	0.0547554	0.0451564	0.225293	-0.0337511	0.143262	1.05628	0.966812	1.15403
ieu-b-85.vcf	ebi-a-GCST90001981	CD40 on CD14+ CD16+ monocyte	id:ebi-a-GCST90001981	102	0.0741675	0.0765264	0.334773	-0.0758243	0.224159	1.07699	0.926979	1.25127
ieu-b-85.vcf	ebi-a-GCST90001485	CD39+ resting CD4 regulatory T cell %CD4 regulatory T cell	id:ebi-a-GCST90001485	100	-0.0228273	0.0315302	0.469078	-0.0846265	0.038972	0.977431	0.918855	1.03974
ieu-b-85.vcf	ebi-a-GCST90001485	CD39+ resting CD4 regulatory T cell %CD4 regulatory T cell	id:ebi-a-GCST90001485	100	-0.0641656	0.0635739	0.315313	-0.18877	0.0604392	0.93785	0.827977	1.0623
ieu-b-85.vcf	ebi-a-GCST90001485	CD39+ resting CD4 regulatory T cell %CD4 regulatory T cell	id:ebi-a-GCST90001485	100	-0.0253903	0.046778	0.587279	-0.117075	0.0662946	0.974929	0.889518	1.06854
ieu-b-85.vcf	ebi-a-GCST90001485	CD39+ resting CD4 regulatory T cell %CD4 regulatory T cell	id:ebi-a-GCST90001485	100	-0.0729545	0.0669271	0.278333	-0.204132	0.0582227	0.929643	0.815355	1.05995
ieu-b-85.vcf	ebi-a-GCST90001628	HLA DR+ CD8+ T cell %T cell	id:ebi-a-GCST90001628	102	-0.00561019	0.0303522	0.853357	-0.0651005	0.0538801	0.994406	0.936973	1.05536
ieu-b-85.vcf	ebi-a-GCST90001628	HLA DR+ CD8+ T cell %T cell	id:ebi-a-GCST90001628	102	-0.0468018	0.0612858	0.446865	-0.166922	0.0733184	0.954277	0.846266	1.07607
ieu-b-85.vcf	ebi-a-GCST90001628	HLA DR+ CD8+ T cell %T cell	id:ebi-a-GCST90001628	102	-0.0150116	0.0469599	0.74922	-0.107053	0.0770299	0.985101	0.898478	1.08007
ieu-b-85.vcf	ebi-a-GCST90001628	HLA DR+ CD8+ T cell %T cell	id:ebi-a-GCST90001628	102	-0.177054	0.0814904	0.032142	-0.336775	-0.0173325	0.837735	0.714069	0.982817
ieu-b-85.vcf	ebi-a-GCST90001661	CD28- CD8dim T cell %T cell	id:ebi-a-GCST90001661	96	-0.0612476	0.0330534	0.0638843	-0.126032	0.00353717	0.94059	0.881586	1.00354
ieu-b-85.vcf	ebi-a-GCST90001661	CD28- CD8dim T cell %T cell	id:ebi-a-GCST90001661	96	-0.120831	0.0672706	0.0756756	-0.252682	0.0110191	0.886183	0.776715	1.01108
ieu-b-85.vcf	ebi-a-GCST90001661	CD28- CD8dim T cell %T cell	id:ebi-a-GCST90001661	96	-0.103476	0.0523304	0.0480015	-0.206043	-0.000908221	0.901698	0.813798	0.999092
ieu-b-85.vcf	ebi-a-GCST90001661	CD28- CD8dim T cell %T cell	id:ebi-a-GCST90001661	96	-0.127878	0.0739101	0.0868461	-0.272741	0.0169863	0.879961	0.76129	1.01713
ieu-b-85.vcf	ebi-a-GCST90001850	CD3 on HLA DR+ CD8+ T cell	id:ebi-a-GCST90001850	96	0.0132145	0.0343845	0.700744	-0.054179	0.0806081	1.0133	0.947262	1.08395
ieu-b-85.vcf	ebi-a-GCST90001850	CD3 on HLA DR+ CD8+ T cell	id:ebi-a-GCST90001850	96	0.0318663	0.0701461	0.650671	-0.10562	0.169353	1.03238	0.899767	1.18454
ieu-b-85.vcf	ebi-a-GCST90001850	CD3 on HLA DR+ CD8+ T cell	id:ebi-a-GCST90001850	96	0.0144267	0.0516238	0.779893	-0.086756	0.115609	1.01453	0.916901	1.12256
ieu-b-85.vcf	ebi-a-GCST90001850	CD3 on HLA DR+ CD8+ T cell	id:ebi-a-GCST90001850	96	0.0656854	0.0878079	0.456273	-0.106418	0.237789	1.06789	0.899049	1.26844
ieu-b-85.vcf	ebi-a-GCST90002043	CD45 on CD33+ HLA DR+ CD14dim	id:ebi-a-GCST90002043	68	-0.0186011	0.0520248	0.720685	-0.12057	0.0833674	0.981571	0.886415	1.08694
ieu-b-85.vcf	ebi-a-GCST90002043	CD45 on CD33+ HLA DR+ CD14dim	id:ebi-a-GCST90002043	68	-0.0563944	0.102732	0.584895	-0.257749	0.14496	0.945166	0.772789	1.15599
ieu-b-85.vcf	ebi-a-GCST90002043	CD45 on CD33+ HLA DR+ CD14dim	id:ebi-a-GCST90002043	68	-0.0248402	0.0756615	0.74268	-0.173137	0.123456	0.975466	0.841023	1.1314
ieu-b-85.vcf	ebi-a-GCST90002043	CD45 on CD33+ HLA DR+ CD14dim	id:ebi-a-GCST90002043	68	-0.0884163	0.110976	0.428433	-0.30593	0.129098	0.91538	0.736438	1.1378
ieu-b-85.vcf	ebi-a-GCST90001490	CD39+ activated CD4 regulatory T cell %activated CD4 regulatory T cell	id:ebi-a-GCST90001490	33	0.0688059	0.061399	0.262443	-0.0515361	0.189148	1.07123	0.949769	1.20822
ieu-b-85.vcf	ebi-a-GCST90001490	CD39+ activated CD4 regulatory T cell %activated CD4 regulatory T cell	id:ebi-a-GCST90001490	33	0.0502263	0.141467	0.724965	-0.227049	0.327501	1.05151	0.796882	1.3875
ieu-b-85.vcf	ebi-a-GCST90001490	CD39+ activated CD4 regulatory T cell %activated CD4 regulatory T cell	id:ebi-a-GCST90001490	33	0.0845194	0.0870143	0.331385	-0.0860287	0.255067	1.08819	0.917568	1.29055
ieu-b-85.vcf	ebi-a-GCST90001490	CD39+ activated CD4 regulatory T cell %activated CD4 regulatory T cell	id:ebi-a-GCST90001490	33	0.0519515	0.116317	0.658145	-0.17603	0.279933	1.05332	0.838593	1.32304
ieu-b-85.vcf	ebi-a-GCST90001584	CD14- CD16+ monocyte %monocyte	id:ebi-a-GCST90001584	98	-0.0206006	0.0313819	0.511536	-0.0821091	0.0409079	0.97961	0.921171	1.04176
ieu-b-85.vcf	ebi-a-GCST90001584	CD14- CD16+ monocyte %monocyte	id:ebi-a-GCST90001584	98	-0.0262793	0.0629894	0.677462	-0.149738	0.0971798	0.974063	0.860933	1.10206
ieu-b-85.vcf	ebi-a-GCST90001584	CD14- CD16+ monocyte %monocyte	id:ebi-a-GCST90001584	98	-0.0316283	0.0453149	0.485197	-0.120446	0.0571888	0.968867	0.886525	1.05886
ieu-b-85.vcf	ebi-a-GCST90001584	CD14- CD16+ monocyte %monocyte	id:ebi-a-GCST90001584	98	-0.0379152	0.0643866	0.557319	-0.164113	0.0882826	0.962795	0.848646	1.0923
ieu-b-85.vcf	ebi-a-GCST90001991	HLA DR on CD14+ monocyte	id:ebi-a-GCST90001991	92	0.0200316	0.0329093	0.542728	-0.0444705	0.0845338	1.02023	0.956504	1.08821
ieu-b-85.vcf	ebi-a-GCST90001991	HLA DR on CD14+ monocyte	id:ebi-a-GCST90001991	92	0.0629877	0.0652959	0.337305	-0.0649923	0.190968	1.06501	0.937075	1.21042
ieu-b-85.vcf	ebi-a-GCST90001991	HLA DR on CD14+ monocyte	id:ebi-a-GCST90001991	92	0.00384589	0.0486048	0.936933	-0.0914196	0.0991114	1.00385	0.912635	1.10419
ieu-b-85.vcf	ebi-a-GCST90001991	HLA DR on CD14+ monocyte	id:ebi-a-GCST90001991	92	0.00152679	0.0611175	0.980125	-0.118263	0.121317	1.00153	0.888462	1.12898
ieu-b-85.vcf	ebi-a-GCST90001793	CD25 on switched memory B cell	id:ebi-a-GCST90001793	93	-0.0061967	0.0320684	0.846776	-0.0690507	0.0566573	0.993822	0.933279	1.05829
ieu-b-85.vcf	ebi-a-GCST90001793	CD25 on switched memory B cell	id:ebi-a-GCST90001793	93	-0.0272004	0.064664	0.675008	-0.153942	0.0995411	0.973166	0.857322	1.10466
ieu-b-85.vcf	ebi-a-GCST90001793	CD25 on switched memory B cell	id:ebi-a-GCST90001793	93	0.0158674	0.0503869	0.752828	-0.0828909	0.114626	1.01599	0.920452	1.12145
ieu-b-85.vcf	ebi-a-GCST90001793	CD25 on switched memory B cell	id:ebi-a-GCST90001793	93	0.0525162	0.0726601	0.471657	-0.0898976	0.19493	1.05392	0.914025	1.21523
ieu-b-85.vcf	ebi-a-GCST90001444	CD20- CD38- B cell %lymphocyte	id:ebi-a-GCST90001444	91	-0.00280026	0.0316863	0.929579	-0.0649055	0.0593049	0.997204	0.937156	1.0611
ieu-b-85.vcf	ebi-a-GCST90001444	CD20- CD38- B cell %lymphocyte	id:ebi-a-GCST90001444	91	-0.0409272	0.0647338	0.528852	-0.167805	0.0859511	0.959899	0.845518	1.08975
ieu-b-85.vcf	ebi-a-GCST90001444	CD20- CD38- B cell %lymphocyte	id:ebi-a-GCST90001444	91	-0.032204	0.0494028	0.514488	-0.129033	0.0646255	0.968309	0.878945	1.06676
ieu-b-85.vcf	ebi-a-GCST90001444	CD20- CD38- B cell %lymphocyte	id:ebi-a-GCST90001444	91	-0.0693783	0.068393	0.313109	-0.203429	0.0646721	0.932974	0.815928	1.06681
ieu-b-85.vcf	ebi-a-GCST90001734	CD19 on IgD- CD38+ B cell	id:ebi-a-GCST90001734	89	0.0347978	0.0327584	0.28812	-0.0294087	0.0990043	1.03541	0.971019	1.10407
ieu-b-85.vcf	ebi-a-GCST90001734	CD19 on IgD- CD38+ B cell	id:ebi-a-GCST90001734	89	0.0443671	0.0659972	0.503201	-0.0849874	0.173722	1.04537	0.918524	1.18972
ieu-b-85.vcf	ebi-a-GCST90001734	CD19 on IgD- CD38+ B cell	id:ebi-a-GCST90001734	89	0.0253403	0.0478752	0.596598	-0.0684951	0.119176	1.02566	0.933798	1.12657
ieu-b-85.vcf	ebi-a-GCST90001734	CD19 on IgD- CD38+ B cell	id:ebi-a-GCST90001734	89	0.029001	0.0642151	0.652652	-0.0968606	0.154863	1.02943	0.907682	1.1675
ieu-b-85.vcf	ebi-a-GCST90001462	CD62L- Dendritic Cell Absolute Count	id:ebi-a-GCST90001462	98	0.0185905	0.0334854	0.57877	-0.0470409	0.0842219	1.01876	0.954048	1.08787
ieu-b-85.vcf	ebi-a-GCST90001462	CD62L- Dendritic Cell Absolute Count	id:ebi-a-GCST90001462	98	-0.00890857	0.0659859	0.892889	-0.138241	0.120424	0.991131	0.870889	1.12797
ieu-b-85.vcf	ebi-a-GCST90001462	CD62L- Dendritic Cell Absolute Count	id:ebi-a-GCST90001462	98	0.014369	0.0515417	0.78041	-0.0866526	0.115391	1.01447	0.916996	1.12231
ieu-b-85.vcf	ebi-a-GCST90001462	CD62L- Dendritic Cell Absolute Count	id:ebi-a-GCST90001462	98	0.0218437	0.0701767	0.756265	-0.115703	0.15939	1.02208	0.89074	1.1728
ieu-b-85.vcf	ebi-a-GCST90001690	CD28+ CD45RA+ CD8+ T cell Absolute Count	id:ebi-a-GCST90001690	93	-0.00474041	0.0229388	0.836279	-0.0497004	0.0402196	0.995271	0.951514	1.04104
ieu-b-85.vcf	ebi-a-GCST90001690	CD28+ CD45RA+ CD8+ T cell Absolute Count	id:ebi-a-GCST90001690	93	0.0521199	0.0458853	0.258992	-0.0378153	0.142055	1.0535	0.962891	1.15264
ieu-b-85.vcf	ebi-a-GCST90001690	CD28+ CD45RA+ CD8+ T cell Absolute Count	id:ebi-a-GCST90001690	93	-0.00612821	0.0345264	0.859121	-0.0738	0.0615435	0.993891	0.928857	1.06348
ieu-b-85.vcf	ebi-a-GCST90001690	CD28+ CD45RA+ CD8+ T cell Absolute Count	id:ebi-a-GCST90001690	93	0.0212109	0.0474157	0.655682	-0.0717239	0.114146	1.02144	0.930788	1.12092
ieu-b-85.vcf	ebi-a-GCST90001794	CD25 on IgD+ B cell	id:ebi-a-GCST90001794	90	0.003529	0.0328916	0.914557	-0.0609385	0.0679965	1.00354	0.940881	1.07036
ieu-b-85.vcf	ebi-a-GCST90001794	CD25 on IgD+ B cell	id:ebi-a-GCST90001794	90	0.0484615	0.0670387	0.471666	-0.0829344	0.179857	1.04965	0.920412	1.19705
ieu-b-85.vcf	ebi-a-GCST90001794	CD25 on IgD+ B cell	id:ebi-a-GCST90001794	90	0.0149542	0.0501967	0.765771	-0.0834313	0.11334	1.01507	0.919954	1.12001
ieu-b-85.vcf	ebi-a-GCST90001794	CD25 on IgD+ B cell	id:ebi-a-GCST90001794	90	0.0444948	0.0916437	0.628501	-0.135127	0.224116	1.0455	0.873605	1.25122
ieu-b-85.vcf	ebi-a-GCST90001747	CD20 on IgD+ CD24- B cell	id:ebi-a-GCST90001747	95	-0.0115953	0.031861	0.715907	-0.0740428	0.0508522	0.988472	0.928632	1.05217
ieu-b-85.vcf	ebi-a-GCST90001747	CD20 on IgD+ CD24- B cell	id:ebi-a-GCST90001747	95	0.00571293	0.0644692	0.929579	-0.120647	0.132073	1.00573	0.886347	1.14119
ieu-b-85.vcf	ebi-a-GCST90001747	CD20 on IgD+ CD24- B cell	id:ebi-a-GCST90001747	95	-0.0578763	0.0472212	0.220333	-0.15043	0.0346772	0.943767	0.860338	1.03529
ieu-b-85.vcf	ebi-a-GCST90001747	CD20 on IgD+ CD24- B cell	id:ebi-a-GCST90001747	95	-0.0606817	0.0613548	0.325188	-0.180937	0.0595737	0.941123	0.834488	1.06138
ieu-b-85.vcf	ebi-a-GCST90001606	CD4+ T cell %leukocyte	id:ebi-a-GCST90001606	96	0.0354486	0.0315728	0.261541	-0.0264341	0.0973314	1.03608	0.973912	1.10223
ieu-b-85.vcf	ebi-a-GCST90001606	CD4+ T cell %leukocyte	id:ebi-a-GCST90001606	96	0.0586879	0.0626549	0.351322	-0.0641158	0.181492	1.06044	0.937896	1.199
ieu-b-85.vcf	ebi-a-GCST90001606	CD4+ T cell %leukocyte	id:ebi-a-GCST90001606	96	0.01248	0.0480702	0.795157	-0.0817377	0.106698	1.01256	0.921514	1.1126
ieu-b-85.vcf	ebi-a-GCST90001606	CD4+ T cell %leukocyte	id:ebi-a-GCST90001606	96	0.01446	0.0676724	0.831257	-0.118178	0.147098	1.01457	0.888538	1.15847
ieu-b-85.vcf	ebi-a-GCST90001521	CD33+ HLA DR+ CD14dim %CD33+ HLA DR+	id:ebi-a-GCST90001521	72	0.0431962	0.0463222	0.351069	-0.0475952	0.133988	1.04414	0.95352	1.14338
ieu-b-85.vcf	ebi-a-GCST90001521	CD33+ HLA DR+ CD14dim %CD33+ HLA DR+	id:ebi-a-GCST90001521	72	0.0211239	0.092839	0.820673	-0.160841	0.203088	1.02135	0.851428	1.22518
ieu-b-85.vcf	ebi-a-GCST90001521	CD33+ HLA DR+ CD14dim %CD33+ HLA DR+	id:ebi-a-GCST90001521	72	0.0502813	0.0696013	0.470037	-0.0861372	0.1867	1.05157	0.917468	1.20527
ieu-b-85.vcf	ebi-a-GCST90001521	CD33+ HLA DR+ CD14dim %CD33+ HLA DR+	id:ebi-a-GCST90001521	72	0.0301561	0.093901	0.749042	-0.15389	0.214202	1.03062	0.857366	1.23887
ieu-b-85.vcf	ebi-a-GCST90002118	CD8 on CD28+ CD45RA- CD8+ T cell	id:ebi-a-GCST90002118	91	0.0328315	0.0358393	0.359628	-0.0374136	0.103077	1.03338	0.963278	1.10858
ieu-b-85.vcf	ebi-a-GCST90002118	CD8 on CD28+ CD45RA- CD8+ T cell	id:ebi-a-GCST90002118	91	0.0637806	0.0729652	0.384404	-0.0792313	0.206792	1.06586	0.923826	1.22973
ieu-b-85.vcf	ebi-a-GCST90002118	CD8 on CD28+ CD45RA- CD8+ T cell	id:ebi-a-GCST90002118	91	0.0769202	0.0509898	0.131416	-0.0230198	0.17686	1.07996	0.977243	1.19346
ieu-b-85.vcf	ebi-a-GCST90002118	CD8 on CD28+ CD45RA- CD8+ T cell	id:ebi-a-GCST90002118	91	0.0817685	0.0635261	0.201337	-0.0427426	0.20628	1.0852	0.958158	1.2291
ieu-b-85.vcf	ebi-a-GCST90001893	CD28 on CD28+ CD45RA- CD8+ T cell	id:ebi-a-GCST90001893	99	0.0211631	0.0350595	0.546087	-0.0475534	0.0898796	1.02139	0.95356	1.09404
ieu-b-85.vcf	ebi-a-GCST90001893	CD28 on CD28+ CD45RA- CD8+ T cell	id:ebi-a-GCST90001893	99	0.0188523	0.0712989	0.792023	-0.120894	0.158598	1.01903	0.886128	1.17187
ieu-b-85.vcf	ebi-a-GCST90001893	CD28 on CD28+ CD45RA- CD8+ T cell	id:ebi-a-GCST90001893	99	0.0381817	0.0525239	0.467263	-0.0647651	0.141129	1.03892	0.937288	1.15157
ieu-b-85.vcf	ebi-a-GCST90001893	CD28 on CD28+ CD45RA- CD8+ T cell	id:ebi-a-GCST90001893	99	0.0447784	0.0808512	0.580952	-0.11369	0.203247	1.0458	0.892535	1.22537
ieu-b-85.vcf	ebi-a-GCST90001657	CD28+ CD4-CD8- T cell Absolute Count	id:ebi-a-GCST90001657	83	-0.0466417	0.0290942	0.108907	-0.103666	0.010383	0.954429	0.901526	1.01044
ieu-b-85.vcf	ebi-a-GCST90001657	CD28+ CD4-CD8- T cell Absolute Count	id:ebi-a-GCST90001657	83	-0.0861624	0.057937	0.140852	-0.199719	0.0273942	0.917445	0.818961	1.02777
ieu-b-85.vcf	ebi-a-GCST90001657	CD28+ CD4-CD8- T cell Absolute Count	id:ebi-a-GCST90001657	83	-0.0168452	0.0448014	0.706919	-0.104656	0.0709655	0.983296	0.900634	1.07354
ieu-b-85.vcf	ebi-a-GCST90001657	CD28+ CD4-CD8- T cell Absolute Count	id:ebi-a-GCST90001657	83	-0.00974896	0.0587531	0.86862	-0.124905	0.105407	0.990298	0.882581	1.11116
ieu-b-85.vcf	ebi-a-GCST90001689	CD28+ CD45RA+ CD8+ T cell %CD8+ T cell	id:ebi-a-GCST90001689	91	0.0102482	0.0248608	0.680174	-0.0384789	0.0589754	1.0103	0.962252	1.06075
ieu-b-85.vcf	ebi-a-GCST90001689	CD28+ CD45RA+ CD8+ T cell %CD8+ T cell	id:ebi-a-GCST90001689	91	0.0104245	0.0498093	0.834701	-0.0872017	0.108051	1.01048	0.916492	1.1141
ieu-b-85.vcf	ebi-a-GCST90001689	CD28+ CD45RA+ CD8+ T cell %CD8+ T cell	id:ebi-a-GCST90001689	91	0.0284819	0.0375866	0.44859	-0.0451878	0.102152	1.02889	0.955818	1.10755
ieu-b-85.vcf	ebi-a-GCST90001689	CD28+ CD45RA+ CD8+ T cell %CD8+ T cell	id:ebi-a-GCST90001689	91	0.0611708	0.0494665	0.219449	-0.0357836	0.158125	1.06308	0.964849	1.17131
ieu-b-85.vcf	ebi-a-GCST90002102	CD45RA on resting CD4 regulatory T cell	id:ebi-a-GCST90002102	93	-0.0439437	0.0335165	0.189823	-0.109636	0.0217487	0.957008	0.89616	1.02199
ieu-b-85.vcf	ebi-a-GCST90002102	CD45RA on resting CD4 regulatory T cell	id:ebi-a-GCST90002102	93	-0.0777117	0.0683447	0.258501	-0.211667	0.056244	0.925231	0.809234	1.05786
ieu-b-85.vcf	ebi-a-GCST90002102	CD45RA on resting CD4 regulatory T cell	id:ebi-a-GCST90002102	93	-0.0587017	0.0523623	0.262259	-0.161332	0.0439284	0.942988	0.85101	1.04491
ieu-b-85.vcf	ebi-a-GCST90002102	CD45RA on resting CD4 regulatory T cell	id:ebi-a-GCST90002102	93	0.112706	0.109305	0.305191	-0.101532	0.326943	1.1193	0.903452	1.38672
ieu-b-85.vcf	ebi-a-GCST90001627	HLA DR+ CD8+ T cell Absolute Count	id:ebi-a-GCST90001627	102	-0.0273898	0.0314725	0.384149	-0.0890759	0.0342963	0.972982	0.914776	1.03489
ieu-b-85.vcf	ebi-a-GCST90001627	HLA DR+ CD8+ T cell Absolute Count	id:ebi-a-GCST90001627	102	-0.100159	0.0634776	0.117755	-0.224575	0.024257	0.904694	0.798856	1.02455
ieu-b-85.vcf	ebi-a-GCST90001627	HLA DR+ CD8+ T cell Absolute Count	id:ebi-a-GCST90001627	102	-0.0111989	0.0497542	0.821914	-0.108717	0.0863194	0.988864	0.896984	1.09015
ieu-b-85.vcf	ebi-a-GCST90001627	HLA DR+ CD8+ T cell Absolute Count	id:ebi-a-GCST90001627	102	-0.0277804	0.0720397	0.700584	-0.168978	0.113417	0.972602	0.844527	1.1201
ieu-b-85.vcf	ebi-a-GCST90001895	CD28 on CD28+ CD4-CD8- T cell	id:ebi-a-GCST90001895	4	0.134061	0.212801	0.528706	-0.28303	0.551152	1.14346	0.753497	1.73525
ieu-b-85.vcf	ebi-a-GCST90001895	CD28 on CD28+ CD4-CD8- T cell	id:ebi-a-GCST90001895	4	0.740309	0.874999	0.486602	-0.974689	2.45531	2.09658	0.37731	11.65
ieu-b-85.vcf	ebi-a-GCST90001895	CD28 on CD28+ CD4-CD8- T cell	id:ebi-a-GCST90001895	4	0.263781	0.244283	0.280224	-0.215014	0.742576	1.30184	0.80653	2.10134
ieu-b-85.vcf	ebi-a-GCST90001895	CD28 on CD28+ CD4-CD8- T cell	id:ebi-a-GCST90001895	4	0.293079	0.293878	0.392127	-0.282921	0.869079	1.34055	0.753579	2.38471
ieu-b-85.vcf	ebi-a-GCST90001666	CD28+ CD45RA+ CD8dim T cell Absolute Count	id:ebi-a-GCST90001666	90	-0.00697725	0.0295185	0.813147	-0.0648335	0.050879	0.993047	0.937223	1.0522
ieu-b-85.vcf	ebi-a-GCST90001666	CD28+ CD45RA+ CD8dim T cell Absolute Count	id:ebi-a-GCST90001666	90	0.00569209	0.0582263	0.922347	-0.108431	0.119816	1.00571	0.89724	1.12729
ieu-b-85.vcf	ebi-a-GCST90001666	CD28+ CD45RA+ CD8dim T cell Absolute Count	id:ebi-a-GCST90001666	90	-0.0234483	0.0454883	0.606218	-0.112605	0.0657088	0.976824	0.893503	1.06792
ieu-b-85.vcf	ebi-a-GCST90001666	CD28+ CD45RA+ CD8dim T cell Absolute Count	id:ebi-a-GCST90001666	90	-0.0627602	0.0601581	0.299656	-0.18067	0.0551497	0.939169	0.834711	1.0567
ieu-b-85.vcf	ebi-a-GCST90002004	CCR2 on CD14+ CD16- monocyte	id:ebi-a-GCST90002004	95	0.0265156	0.0314106	0.39858	-0.0350492	0.0880803	1.02687	0.965558	1.09208
ieu-b-85.vcf	ebi-a-GCST90002004	CCR2 on CD14+ CD16- monocyte	id:ebi-a-GCST90002004	95	0.0409864	0.0638407	0.522446	-0.0841414	0.166114	1.04184	0.919301	1.18071
ieu-b-85.vcf	ebi-a-GCST90002004	CCR2 on CD14+ CD16- monocyte	id:ebi-a-GCST90002004	95	-0.0258318	0.0484582	0.593982	-0.12081	0.0691462	0.974499	0.886202	1.07159
ieu-b-85.vcf	ebi-a-GCST90002004	CCR2 on CD14+ CD16- monocyte	id:ebi-a-GCST90002004	95	-0.108158	0.0860157	0.211716	-0.276749	0.0604328	0.897486	0.758245	1.0623
ieu-b-85.vcf	ebi-a-GCST90001711	BAFF-R on IgD- CD27- B cell	id:ebi-a-GCST90001711	94	-0.0274961	0.0328604	0.402732	-0.0919025	0.0369104	0.972879	0.912194	1.0376
ieu-b-85.vcf	ebi-a-GCST90001711	BAFF-R on IgD- CD27- B cell	id:ebi-a-GCST90001711	94	-0.050775	0.0658794	0.442844	-0.179899	0.0783486	0.950493	0.835355	1.0815
ieu-b-85.vcf	ebi-a-GCST90001711	BAFF-R on IgD- CD27- B cell	id:ebi-a-GCST90001711	94	-0.014658	0.0506668	0.77235	-0.113965	0.0846489	0.985449	0.892289	1.08833
ieu-b-85.vcf	ebi-a-GCST90001711	BAFF-R on IgD- CD27- B cell	id:ebi-a-GCST90001711	94	-0.0447969	0.0654536	0.49542	-0.173086	0.0834922	0.956192	0.841065	1.08708
ieu-b-85.vcf	ebi-a-GCST90001824	IgD on IgD+ CD38+ B cell	id:ebi-a-GCST90001824	93	-0.0033569	0.0323222	0.917282	-0.0667083	0.0599945	0.996649	0.935468	1.06183
ieu-b-85.vcf	ebi-a-GCST90001824	IgD on IgD+ CD38+ B cell	id:ebi-a-GCST90001824	93	-0.0515319	0.065257	0.43177	-0.179436	0.0763718	0.949773	0.835742	1.07936
ieu-b-85.vcf	ebi-a-GCST90001824	IgD on IgD+ CD38+ B cell	id:ebi-a-GCST90001824	93	-0.0138295	0.0515049	0.788307	-0.114779	0.08712	0.986266	0.891563	1.09103
ieu-b-85.vcf	ebi-a-GCST90001824	IgD on IgD+ CD38+ B cell	id:ebi-a-GCST90001824	93	-0.157864	0.0845816	0.0651691	-0.323644	0.00791577	0.853966	0.723508	1.00795
ieu-b-85.vcf	ebi-a-GCST90001898	CD28 on CD4+ T cell	id:ebi-a-GCST90001898	91	0.0554481	0.0358483	0.121925	-0.0148145	0.125711	1.05701	0.985295	1.13395
ieu-b-85.vcf	ebi-a-GCST90001898	CD28 on CD4+ T cell	id:ebi-a-GCST90001898	91	0.0899927	0.0722521	0.216203	-0.0516214	0.231607	1.09417	0.949688	1.26062
ieu-b-85.vcf	ebi-a-GCST90001898	CD28 on CD4+ T cell	id:ebi-a-GCST90001898	91	0.0843389	0.0529124	0.110951	-0.0193694	0.188047	1.088	0.980817	1.20689
ieu-b-85.vcf	ebi-a-GCST90001898	CD28 on CD4+ T cell	id:ebi-a-GCST90001898	91	0.120771	0.0684403	0.0810199	-0.0133717	0.254914	1.12837	0.986717	1.29035
ieu-b-85.vcf	ebi-a-GCST90001516	Immature Myeloid-Derived Suppressor Cells %CD33dim HLA DR- CD66b-	id:ebi-a-GCST90001516	79	-0.0435103	0.044073	0.323528	-0.129893	0.0428728	0.957423	0.878189	1.04381
ieu-b-85.vcf	ebi-a-GCST90001516	Immature Myeloid-Derived Suppressor Cells %CD33dim HLA DR- CD66b-	id:ebi-a-GCST90001516	79	-0.128825	0.0897546	0.155251	-0.304744	0.0470941	0.879128	0.737312	1.04822
ieu-b-85.vcf	ebi-a-GCST90001516	Immature Myeloid-Derived Suppressor Cells %CD33dim HLA DR- CD66b-	id:ebi-a-GCST90001516	79	-0.0653449	0.0676696	0.334221	-0.197977	0.0672876	0.936744	0.820388	1.0696
ieu-b-85.vcf	ebi-a-GCST90001516	Immature Myeloid-Derived Suppressor Cells %CD33dim HLA DR- CD66b-	id:ebi-a-GCST90001516	79	0.0142977	0.0947821	0.880485	-0.171475	0.20007	1.0144	0.842421	1.22149
ieu-b-85.vcf	ebi-a-GCST90001552	Naive CD8+ T cell %CD8+ T cell	id:ebi-a-GCST90001552	101	0.015421	0.0238237	0.51744	-0.0312734	0.0621153	1.01554	0.969211	1.06409
ieu-b-85.vcf	ebi-a-GCST90001552	Naive CD8+ T cell %CD8+ T cell	id:ebi-a-GCST90001552	101	0.0277474	0.0477522	0.562513	-0.0658469	0.121342	1.02814	0.936274	1.12901
ieu-b-85.vcf	ebi-a-GCST90001552	Naive CD8+ T cell %CD8+ T cell	id:ebi-a-GCST90001552	101	0.0231358	0.036718	0.528632	-0.0488314	0.0951031	1.02341	0.952342	1.09977
ieu-b-85.vcf	ebi-a-GCST90001552	Naive CD8+ T cell %CD8+ T cell	id:ebi-a-GCST90001552	101	0.0623572	0.051728	0.230861	-0.0390296	0.163744	1.06434	0.961722	1.17791
ieu-b-85.vcf	ebi-a-GCST90001978	FSC-A on HLA DR+ CD8+ T cell	id:ebi-a-GCST90001978	88	-0.014236	0.0343051	0.678155	-0.0814739	0.0530019	0.985865	0.921757	1.05443
ieu-b-85.vcf	ebi-a-GCST90001978	FSC-A on HLA DR+ CD8+ T cell	id:ebi-a-GCST90001978	88	-0.0244199	0.0722649	0.736245	-0.166059	0.117219	0.975876	0.846996	1.12437
ieu-b-85.vcf	ebi-a-GCST90001978	FSC-A on HLA DR+ CD8+ T cell	id:ebi-a-GCST90001978	88	0.0238219	0.0506273	0.637974	-0.0754076	0.123051	1.02411	0.927365	1.13094
ieu-b-85.vcf	ebi-a-GCST90001978	FSC-A on HLA DR+ CD8+ T cell	id:ebi-a-GCST90001978	88	0.0438925	0.068175	0.521385	-0.0897305	0.177515	1.04487	0.914178	1.19425
ieu-b-85.vcf	ebi-a-GCST90001675	CD28- CD127- CD25++ CD8+ T cell Absolute Count	id:ebi-a-GCST90001675	87	-0.0703034	0.0330957	0.0336496	-0.135171	-0.00543584	0.932111	0.873567	0.994579
ieu-b-85.vcf	ebi-a-GCST90001675	CD28- CD127- CD25++ CD8+ T cell Absolute Count	id:ebi-a-GCST90001675	87	-0.114787	0.0678271	0.0942429	-0.247728	0.0181542	0.891556	0.780572	1.01832
ieu-b-85.vcf	ebi-a-GCST90001675	CD28- CD127- CD25++ CD8+ T cell Absolute Count	id:ebi-a-GCST90001675	87	-0.0802389	0.0499634	0.108284	-0.178167	0.0176893	0.922896	0.836803	1.01785
ieu-b-85.vcf	ebi-a-GCST90001675	CD28- CD127- CD25++ CD8+ T cell Absolute Count	id:ebi-a-GCST90001675	87	-0.0873132	0.0769781	0.259837	-0.23819	0.0635638	0.91639	0.788053	1.06563
ieu-b-85.vcf	ebi-a-GCST90001637	CD4-CD8- Natural Killer T %T cell	id:ebi-a-GCST90001637	95	-0.0363645	0.032026	0.256179	-0.0991354	0.0264064	0.964289	0.90562	1.02676
ieu-b-85.vcf	ebi-a-GCST90001637	CD4-CD8- Natural Killer T %T cell	id:ebi-a-GCST90001637	95	-0.0781091	0.0644597	0.228677	-0.20445	0.0482319	0.924863	0.815095	1.04941
ieu-b-85.vcf	ebi-a-GCST90001637	CD4-CD8- Natural Killer T %T cell	id:ebi-a-GCST90001637	95	-0.106311	0.0475699	0.0254282	-0.199548	-0.0130739	0.899145	0.819101	0.987011
ieu-b-85.vcf	ebi-a-GCST90001637	CD4-CD8- Natural Killer T %T cell	id:ebi-a-GCST90001637	95	-0.132484	0.0665175	0.0493035	-0.262858	-0.00211004	0.875917	0.768851	0.997892
ieu-b-85.vcf	ebi-a-GCST90001904	CD86 on CD62L+ myeloid Dendritic Cell	id:ebi-a-GCST90001904	95	-0.0409123	0.036053	0.256466	-0.111576	0.0297515	0.959913	0.894423	1.0302
ieu-b-85.vcf	ebi-a-GCST90001904	CD86 on CD62L+ myeloid Dendritic Cell	id:ebi-a-GCST90001904	95	-0.0611422	0.0716241	0.39549	-0.201525	0.079241	0.940689	0.817483	1.08247
ieu-b-85.vcf	ebi-a-GCST90001904	CD86 on CD62L+ myeloid Dendritic Cell	id:ebi-a-GCST90001904	95	-0.0537304	0.0537006	0.317042	-0.158984	0.0515228	0.947688	0.85301	1.05287
ieu-b-85.vcf	ebi-a-GCST90001904	CD86 on CD62L+ myeloid Dendritic Cell	id:ebi-a-GCST90001904	95	-0.0988097	0.0652024	0.133019	-0.226606	0.028987	0.905915	0.797235	1.02941
ieu-b-85.vcf	ebi-a-GCST90001885	CD16-CD56 on HLA DR+ Natural Killer	id:ebi-a-GCST90001885	97	-0.0031883	0.034589	0.926558	-0.0709827	0.0646061	0.996817	0.931478	1.06674
ieu-b-85.vcf	ebi-a-GCST90001885	CD16-CD56 on HLA DR+ Natural Killer	id:ebi-a-GCST90001885	97	0.0150065	0.0705844	0.832092	-0.123339	0.153352	1.01512	0.883964	1.16574
ieu-b-85.vcf	ebi-a-GCST90001885	CD16-CD56 on HLA DR+ Natural Killer	id:ebi-a-GCST90001885	97	0.00706857	0.0515829	0.891004	-0.0940338	0.108171	1.00709	0.910252	1.11424
ieu-b-85.vcf	ebi-a-GCST90001885	CD16-CD56 on HLA DR+ Natural Killer	id:ebi-a-GCST90001885	97	-0.0820361	0.0754715	0.279767	-0.22996	0.0658881	0.921239	0.794565	1.06811
ieu-b-85.vcf	ebi-a-GCST90001426	IgD- CD38dim B cell %lymphocyte	id:ebi-a-GCST90001426	93	0.0328325	0.0319571	0.304235	-0.0298034	0.0954684	1.03338	0.970636	1.10017
ieu-b-85.vcf	ebi-a-GCST90001426	IgD- CD38dim B cell %lymphocyte	id:ebi-a-GCST90001426	93	0.065353	0.0653288	0.319784	-0.0626914	0.193397	1.06754	0.939233	1.21336
ieu-b-85.vcf	ebi-a-GCST90001426	IgD- CD38dim B cell %lymphocyte	id:ebi-a-GCST90001426	93	0.0678077	0.0498685	0.173915	-0.0299345	0.16555	1.07016	0.970509	1.18004
ieu-b-85.vcf	ebi-a-GCST90001426	IgD- CD38dim B cell %lymphocyte	id:ebi-a-GCST90001426	93	0.116599	0.0723412	0.110432	-0.0251896	0.258388	1.12367	0.975125	1.29484
ieu-b-85.vcf	ebi-a-GCST90001576	Transitional B cell %B cell	id:ebi-a-GCST90001576	97	0.0286369	0.0318569	0.368695	-0.0338027	0.0910764	1.02905	0.966762	1.09535
ieu-b-85.vcf	ebi-a-GCST90001576	Transitional B cell %B cell	id:ebi-a-GCST90001576	97	0.0384368	0.0653046	0.557541	-0.0895602	0.166434	1.03919	0.914333	1.18109
ieu-b-85.vcf	ebi-a-GCST90001576	Transitional B cell %B cell	id:ebi-a-GCST90001576	97	0.0790483	0.0467706	0.0910035	-0.0126221	0.170719	1.08226	0.987457	1.18616
ieu-b-85.vcf	ebi-a-GCST90001576	Transitional B cell %B cell	id:ebi-a-GCST90001576	97	0.100149	0.0656857	0.13063	-0.0285952	0.228893	1.10534	0.97181	1.25721
ieu-b-85.vcf	ebi-a-GCST90002022	CD4 on CD4+ T cell	id:ebi-a-GCST90002022	81	-0.028646	0.0382352	0.453734	-0.103587	0.0462949	0.97176	0.901598	1.04738
ieu-b-85.vcf	ebi-a-GCST90002022	CD4 on CD4+ T cell	id:ebi-a-GCST90002022	81	-0.0482754	0.0743544	0.518053	-0.19401	0.0974592	0.952871	0.82365	1.10237
ieu-b-85.vcf	ebi-a-GCST90002022	CD4 on CD4+ T cell	id:ebi-a-GCST90002022	81	-0.0444075	0.0556615	0.424979	-0.153504	0.0646891	0.956564	0.857697	1.06683
ieu-b-85.vcf	ebi-a-GCST90002022	CD4 on CD4+ T cell	id:ebi-a-GCST90002022	81	-0.063097	0.0723158	0.385536	-0.204836	0.078642	0.938852	0.814781	1.08182
ieu-b-85.vcf	ebi-a-GCST90001700	CD45RA+ CD28- CD8+ T cell %T cell	id:ebi-a-GCST90001700	94	-0.0166972	0.195866	0.932064	-0.400595	0.3672	0.983441	0.669921	1.44369
ieu-b-85.vcf	ebi-a-GCST90001700	CD45RA+ CD28- CD8+ T cell %T cell	id:ebi-a-GCST90001700	94	-0.475539	0.392214	0.228445	-1.24428	0.2932	0.62155	0.288149	1.34071
ieu-b-85.vcf	ebi-a-GCST90001700	CD45RA+ CD28- CD8+ T cell %T cell	id:ebi-a-GCST90001700	94	-0.0782623	0.300253	0.794359	-0.666758	0.510233	0.924722	0.51337	1.66568
ieu-b-85.vcf	ebi-a-GCST90001700	CD45RA+ CD28- CD8+ T cell %T cell	id:ebi-a-GCST90001700	94	-0.0849342	0.45175	0.851277	-0.970364	0.800496	0.918573	0.378945	2.22665
ieu-b-85.vcf	ebi-a-GCST90001713	BAFF-R on IgD- CD38+ B cell	id:ebi-a-GCST90001713	101	-0.000570597	0.0319454	0.985749	-0.0631836	0.0620424	0.99943	0.938771	1.06401
ieu-b-85.vcf	ebi-a-GCST90001713	BAFF-R on IgD- CD38+ B cell	id:ebi-a-GCST90001713	101	0.00650041	0.0637094	0.918937	-0.11837	0.131371	1.00652	0.888367	1.14039
ieu-b-85.vcf	ebi-a-GCST90001713	BAFF-R on IgD- CD38+ B cell	id:ebi-a-GCST90001713	101	0.0387503	0.049088	0.429875	-0.0574621	0.134963	1.03951	0.944158	1.14449
ieu-b-85.vcf	ebi-a-GCST90001713	BAFF-R on IgD- CD38+ B cell	id:ebi-a-GCST90001713	101	0.0569712	0.0689945	0.41092	-0.0782581	0.1922	1.05863	0.924726	1.21191
ieu-b-85.vcf	ebi-a-GCST90001450	CD62L- monocyte Absolute Count	id:ebi-a-GCST90001450	86	-0.00657329	0.0360777	0.855427	-0.0772856	0.0641391	0.993448	0.925625	1.06624
ieu-b-85.vcf	ebi-a-GCST90001450	CD62L- monocyte Absolute Count	id:ebi-a-GCST90001450	86	-0.0734026	0.0716562	0.308601	-0.213849	0.0670436	0.929227	0.807471	1.06934
ieu-b-85.vcf	ebi-a-GCST90001450	CD62L- monocyte Absolute Count	id:ebi-a-GCST90001450	86	0.0363514	0.0543254	0.503405	-0.0701263	0.142829	1.03702	0.932276	1.15353
ieu-b-85.vcf	ebi-a-GCST90001450	CD62L- monocyte Absolute Count	id:ebi-a-GCST90001450	86	0.0627413	0.0784824	0.426269	-0.0910842	0.216567	1.06475	0.912941	1.24181
ieu-b-85.vcf	ebi-a-GCST90001418	CD24+ CD27+ B cell Absolute Count	id:ebi-a-GCST90001418	96	0.00894128	0.0322872	0.781834	-0.0543417	0.0722243	1.00898	0.947108	1.0749
ieu-b-85.vcf	ebi-a-GCST90001418	CD24+ CD27+ B cell Absolute Count	id:ebi-a-GCST90001418	96	0.00124179	0.0663332	0.985104	-0.128771	0.131255	1.00124	0.879175	1.14026
ieu-b-85.vcf	ebi-a-GCST90001418	CD24+ CD27+ B cell Absolute Count	id:ebi-a-GCST90001418	96	0.0183089	0.0482678	0.70445	-0.0762959	0.112914	1.01848	0.926542	1.11954
ieu-b-85.vcf	ebi-a-GCST90001418	CD24+ CD27+ B cell Absolute Count	id:ebi-a-GCST90001418	96	0.020222	0.0715219	0.777992	-0.119961	0.160405	1.02043	0.886955	1.17399
ieu-b-85.vcf	ebi-a-GCST90001992	CCR2 on CD14+ CD16+ monocyte	id:ebi-a-GCST90001992	89	0.010216	0.0318534	0.748422	-0.0522166	0.0726487	1.01027	0.949123	1.07535
ieu-b-85.vcf	ebi-a-GCST90001992	CCR2 on CD14+ CD16+ monocyte	id:ebi-a-GCST90001992	89	-0.0363131	0.0647083	0.576117	-0.163141	0.0905153	0.964338	0.849471	1.09474
ieu-b-85.vcf	ebi-a-GCST90001992	CCR2 on CD14+ CD16+ monocyte	id:ebi-a-GCST90001992	89	-0.00869549	0.0496519	0.860978	-0.106013	0.0886222	0.991342	0.899413	1.09267
ieu-b-85.vcf	ebi-a-GCST90001992	CCR2 on CD14+ CD16+ monocyte	id:ebi-a-GCST90001992	89	-0.121164	0.0879548	0.171828	-0.293556	0.0512271	0.885888	0.745608	1.05256
ieu-b-85.vcf	ebi-a-GCST90001777	CD25 on CD24+ CD27+ B cell	id:ebi-a-GCST90001777	89	-0.0270476	0.0319285	0.396922	-0.0896274	0.0355322	0.973315	0.914272	1.03617
ieu-b-85.vcf	ebi-a-GCST90001777	CD25 on CD24+ CD27+ B cell	id:ebi-a-GCST90001777	89	-0.0689892	0.0649037	0.290748	-0.1962	0.0582221	0.933337	0.821847	1.05995
ieu-b-85.vcf	ebi-a-GCST90001777	CD25 on CD24+ CD27+ B cell	id:ebi-a-GCST90001777	89	-0.0135883	0.0501675	0.7865	-0.111917	0.0847401	0.986504	0.894119	1.08843
ieu-b-85.vcf	ebi-a-GCST90001777	CD25 on CD24+ CD27+ B cell	id:ebi-a-GCST90001777	89	0.0627931	0.0741816	0.399582	-0.0826029	0.208189	1.06481	0.920717	1.23145
ieu-b-85.vcf	ebi-a-GCST90002090	CD11c on granulocyte	id:ebi-a-GCST90002090	87	-0.0246596	0.0371195	0.50648	-0.0974139	0.0480947	0.975642	0.90718	1.04927
ieu-b-85.vcf	ebi-a-GCST90002090	CD11c on granulocyte	id:ebi-a-GCST90002090	87	-0.0871047	0.0757023	0.253115	-0.235481	0.0612718	0.916581	0.790191	1.06319
ieu-b-85.vcf	ebi-a-GCST90002090	CD11c on granulocyte	id:ebi-a-GCST90002090	87	-0.0373212	0.0567182	0.510531	-0.148489	0.0738464	0.963367	0.86201	1.07664
ieu-b-85.vcf	ebi-a-GCST90002090	CD11c on granulocyte	id:ebi-a-GCST90002090	87	-0.0302408	0.083252	0.717314	-0.193415	0.132933	0.970212	0.82414	1.14217
ieu-b-85.vcf	ebi-a-GCST90001879	HVEM on Terminally Differentiated CD4+ T cell	id:ebi-a-GCST90001879	67	0.0225495	0.0582527	0.698684	-0.0916259	0.136725	1.02281	0.912446	1.14651
ieu-b-85.vcf	ebi-a-GCST90001879	HVEM on Terminally Differentiated CD4+ T cell	id:ebi-a-GCST90001879	67	0.0110157	0.116794	0.925147	-0.2179	0.239931	1.01108	0.804206	1.27116
ieu-b-85.vcf	ebi-a-GCST90001879	HVEM on Terminally Differentiated CD4+ T cell	id:ebi-a-GCST90001879	67	-0.0213498	0.0864447	0.804926	-0.190781	0.148082	0.978876	0.826313	1.15961
ieu-b-85.vcf	ebi-a-GCST90001879	HVEM on Terminally Differentiated CD4+ T cell	id:ebi-a-GCST90001879	67	-0.130929	0.11558	0.261398	-0.357466	0.0956081	0.87728	0.699447	1.10033
ieu-b-85.vcf	ebi-a-GCST90001423	CD20- CD38- B cell Absolute Count	id:ebi-a-GCST90001423	94	0.00670943	0.0316889	0.832319	-0.0554008	0.0688197	1.00673	0.946106	1.07124
ieu-b-85.vcf	ebi-a-GCST90001423	CD20- CD38- B cell Absolute Count	id:ebi-a-GCST90001423	94	-0.0216144	0.0641329	0.736866	-0.147315	0.104086	0.978618	0.863022	1.1097
ieu-b-85.vcf	ebi-a-GCST90001423	CD20- CD38- B cell Absolute Count	id:ebi-a-GCST90001423	94	-0.0468285	0.0486716	0.335983	-0.142225	0.0485678	0.954251	0.867426	1.04977
ieu-b-85.vcf	ebi-a-GCST90001423	CD20- CD38- B cell Absolute Count	id:ebi-a-GCST90001423	94	-0.0674819	0.062971	0.286657	-0.190905	0.0559413	0.934745	0.826211	1.05754
ieu-b-85.vcf	ebi-a-GCST90001510	CD25++ CD45RA- CD4 not regulatory T cell Absolute Count	id:ebi-a-GCST90001510	96	-0.0105554	0.0333737	0.751791	-0.0759678	0.054857	0.9895	0.926846	1.05639
ieu-b-85.vcf	ebi-a-GCST90001510	CD25++ CD45RA- CD4 not regulatory T cell Absolute Count	id:ebi-a-GCST90001510	96	0.0257042	0.0672874	0.703319	-0.106179	0.157588	1.02604	0.899264	1.17068
ieu-b-85.vcf	ebi-a-GCST90001510	CD25++ CD45RA- CD4 not regulatory T cell Absolute Count	id:ebi-a-GCST90001510	96	-0.0062825	0.0503037	0.90061	-0.104878	0.0923128	0.993737	0.900435	1.09671
ieu-b-85.vcf	ebi-a-GCST90001510	CD25++ CD45RA- CD4 not regulatory T cell Absolute Count	id:ebi-a-GCST90001510	96	0.0641695	0.0880689	0.468022	-0.108446	0.236785	1.06627	0.897228	1.26717
ieu-b-85.vcf	ebi-a-GCST90001559	Terminally Differentiated CD8+ T cell %T cell	id:ebi-a-GCST90001559	94	-0.0196029	0.0325393	0.546882	-0.0833799	0.0441741	0.980588	0.920002	1.04516
ieu-b-85.vcf	ebi-a-GCST90001559	Terminally Differentiated CD8+ T cell %T cell	id:ebi-a-GCST90001559	94	-0.074291	0.0662483	0.265035	-0.204138	0.0555556	0.928401	0.81535	1.05713
ieu-b-85.vcf	ebi-a-GCST90001559	Terminally Differentiated CD8+ T cell %T cell	id:ebi-a-GCST90001559	94	0.0117625	0.0492532	0.811248	-0.0847737	0.108299	1.01183	0.91872	1.11438
ieu-b-85.vcf	ebi-a-GCST90001559	Terminally Differentiated CD8+ T cell %T cell	id:ebi-a-GCST90001559	94	0.0773241	0.0796368	0.334087	-0.078764	0.233412	1.08039	0.924258	1.2629
ieu-b-85.vcf	ebi-a-GCST90001906	CD86 on granulocyte	id:ebi-a-GCST90001906	86	0.0262028	0.0373645	0.483132	-0.0470316	0.0994371	1.02655	0.954057	1.10455
ieu-b-85.vcf	ebi-a-GCST90001906	CD86 on granulocyte	id:ebi-a-GCST90001906	86	0.052739	0.076176	0.490639	-0.096566	0.202044	1.05415	0.90795	1.2239
ieu-b-85.vcf	ebi-a-GCST90001906	CD86 on granulocyte	id:ebi-a-GCST90001906	86	0.0322218	0.0537445	0.548815	-0.0731175	0.137561	1.03275	0.929492	1.14747
ieu-b-85.vcf	ebi-a-GCST90001906	CD86 on granulocyte	id:ebi-a-GCST90001906	86	0.0706737	0.070694	0.320287	-0.0678865	0.209234	1.07323	0.934366	1.23273
ieu-b-85.vcf	ebi-a-GCST90001901	CD28 on CD39+ resting CD4 regulatory T cell	id:ebi-a-GCST90001901	85	0.0484537	0.0360801	0.179289	-0.0222633	0.119171	1.04965	0.977983	1.12656
ieu-b-85.vcf	ebi-a-GCST90001901	CD28 on CD39+ resting CD4 regulatory T cell	id:ebi-a-GCST90001901	85	0.141262	0.0722938	0.0540686	-0.000433451	0.282958	1.15173	0.999567	1.32705
ieu-b-85.vcf	ebi-a-GCST90001901	CD28 on CD39+ resting CD4 regulatory T cell	id:ebi-a-GCST90001901	85	0.13173	0.0509489	0.00972285	0.0318703	0.23159	1.1408	1.03238	1.2606
ieu-b-85.vcf	ebi-a-GCST90001901	CD28 on CD39+ resting CD4 regulatory T cell	id:ebi-a-GCST90001901	85	0.173563	0.0692073	0.01407	0.0379171	0.30921	1.18954	1.03865	1.36235
ieu-b-85.vcf	ebi-a-GCST90002000	PDL-1 on CD14- CD16-	id:ebi-a-GCST90002000	88	0.0132217	0.0318486	0.678039	-0.0492017	0.075645	1.01331	0.951989	1.07858
ieu-b-85.vcf	ebi-a-GCST90002000	PDL-1 on CD14- CD16-	id:ebi-a-GCST90002000	88	-0.00384776	0.0638396	0.952079	-0.128973	0.121278	0.99616	0.878997	1.12894
ieu-b-85.vcf	ebi-a-GCST90002000	PDL-1 on CD14- CD16-	id:ebi-a-GCST90002000	88	-0.00558826	0.0468567	0.905067	-0.0974274	0.0862509	0.994427	0.907168	1.09008
ieu-b-85.vcf	ebi-a-GCST90002000	PDL-1 on CD14- CD16-	id:ebi-a-GCST90002000	88	-0.0338372	0.0706366	0.633118	-0.172285	0.104611	0.966729	0.841739	1.11028
ieu-b-85.vcf	ebi-a-GCST90002059	CD8 on Natural Killer T	id:ebi-a-GCST90002059	93	0.0219415	0.0344982	0.524765	-0.045675	0.089558	1.02218	0.955352	1.09369
ieu-b-85.vcf	ebi-a-GCST90002059	CD8 on Natural Killer T	id:ebi-a-GCST90002059	93	0.0719479	0.0690975	0.300517	-0.0634833	0.207379	1.0746	0.93849	1.23045
ieu-b-85.vcf	ebi-a-GCST90002059	CD8 on Natural Killer T	id:ebi-a-GCST90002059	93	0.00676897	0.0500771	0.892477	-0.0913821	0.10492	1.00679	0.912669	1.11062
ieu-b-85.vcf	ebi-a-GCST90002059	CD8 on Natural Killer T	id:ebi-a-GCST90002059	93	0.0219674	0.0690669	0.75116	-0.113404	0.157339	1.02221	0.89279	1.17039
ieu-b-85.vcf	ebi-a-GCST90001855	CD3 on secreting CD4 regulatory T cell	id:ebi-a-GCST90001855	89	0.0265445	0.0361628	0.462931	-0.0443346	0.0974236	1.0269	0.956634	1.10233
ieu-b-85.vcf	ebi-a-GCST90001855	CD3 on secreting CD4 regulatory T cell	id:ebi-a-GCST90001855	89	0.0848205	0.0725835	0.24576	-0.0574431	0.227084	1.08852	0.944176	1.25494
ieu-b-85.vcf	ebi-a-GCST90001855	CD3 on secreting CD4 regulatory T cell	id:ebi-a-GCST90001855	89	0.0514213	0.053983	0.34082	-0.0543854	0.157228	1.05277	0.947067	1.17026
ieu-b-85.vcf	ebi-a-GCST90001855	CD3 on secreting CD4 regulatory T cell	id:ebi-a-GCST90001855	89	0.0400287	0.0697013	0.567237	-0.0965858	0.176643	1.04084	0.907932	1.19321
ieu-b-85.vcf	ebi-a-GCST90001415	IgD+ CD24- B cell %B cell	id:ebi-a-GCST90001415	91	-0.0405274	0.0330826	0.220561	-0.105369	0.0243144	0.960283	0.899992	1.02461
ieu-b-85.vcf	ebi-a-GCST90001415	IgD+ CD24- B cell %B cell	id:ebi-a-GCST90001415	91	-0.0790948	0.0669222	0.240397	-0.210262	0.0520727	0.923952	0.810372	1.05345
ieu-b-85.vcf	ebi-a-GCST90001415	IgD+ CD24- B cell %B cell	id:ebi-a-GCST90001415	91	-0.04169	0.052333	0.425666	-0.144263	0.0608826	0.959167	0.86566	1.06277
ieu-b-85.vcf	ebi-a-GCST90001415	IgD+ CD24- B cell %B cell	id:ebi-a-GCST90001415	91	-0.0384284	0.0697295	0.582926	-0.175098	0.0982414	0.962301	0.839375	1.10323
ieu-b-85.vcf	ebi-a-GCST90001593	CD8+ T cell %T cell	id:ebi-a-GCST90001593	96	0.0207394	0.0316449	0.512224	-0.0412846	0.0827634	1.02096	0.959556	1.08628
ieu-b-85.vcf	ebi-a-GCST90001593	CD8+ T cell %T cell	id:ebi-a-GCST90001593	96	0.0348984	0.0628301	0.579913	-0.0882487	0.158045	1.03551	0.915533	1.17122
ieu-b-85.vcf	ebi-a-GCST90001593	CD8+ T cell %T cell	id:ebi-a-GCST90001593	96	-0.00529049	0.0497117	0.915246	-0.102725	0.0921444	0.994723	0.902375	1.09652
ieu-b-85.vcf	ebi-a-GCST90001593	CD8+ T cell %T cell	id:ebi-a-GCST90001593	96	-0.063512	0.0747354	0.397559	-0.209993	0.0829695	0.938463	0.81059	1.08651
ieu-b-85.vcf	ebi-a-GCST90001612	CD8dim T cell %leukocyte	id:ebi-a-GCST90001612	95	-0.0669155	0.0320733	0.0369485	-0.129779	-0.00405191	0.935274	0.878289	0.995956
ieu-b-85.vcf	ebi-a-GCST90001612	CD8dim T cell %leukocyte	id:ebi-a-GCST90001612	95	-0.0693654	0.0656134	0.293167	-0.197968	0.059237	0.932986	0.820396	1.06103
ieu-b-85.vcf	ebi-a-GCST90001612	CD8dim T cell %leukocyte	id:ebi-a-GCST90001612	95	-0.0756963	0.0496959	0.127711	-0.1731	0.0217077	0.927098	0.841053	1.02195
ieu-b-85.vcf	ebi-a-GCST90001612	CD8dim T cell %leukocyte	id:ebi-a-GCST90001612	95	-0.0536696	0.0921949	0.561872	-0.234372	0.127032	0.947745	0.791068	1.13545
ieu-b-85.vcf	ebi-a-GCST90001699	CD45RA+ CD28- CD8+ T cell %CD8+ T cell	id:ebi-a-GCST90001699	93	0.108826	0.454349	0.810701	-0.781697	0.99935	1.11497	0.457629	2.71652
ieu-b-85.vcf	ebi-a-GCST90001699	CD45RA+ CD28- CD8+ T cell %CD8+ T cell	id:ebi-a-GCST90001699	93	-1.31045	0.924452	0.15974	-3.12237	0.501477	0.269699	0.0440524	1.65116
ieu-b-85.vcf	ebi-a-GCST90001699	CD45RA+ CD28- CD8+ T cell %CD8+ T cell	id:ebi-a-GCST90001699	93	-0.446639	0.690494	0.517736	-1.80001	0.90673	0.639775	0.165298	2.47621
ieu-b-85.vcf	ebi-a-GCST90001699	CD45RA+ CD28- CD8+ T cell %CD8+ T cell	id:ebi-a-GCST90001699	93	-0.494814	0.964004	0.608979	-2.38426	1.39463	0.609684	0.0921571	4.03349
ieu-b-85.vcf	ebi-a-GCST90001799	CD27 on T cell	id:ebi-a-GCST90001799	79	0.0588395	0.044376	0.184863	-0.0281375	0.145816	1.0606	0.972255	1.15698
ieu-b-85.vcf	ebi-a-GCST90001799	CD27 on T cell	id:ebi-a-GCST90001799	79	0.0855094	0.0889075	0.339171	-0.0887494	0.259768	1.08927	0.915075	1.29663
ieu-b-85.vcf	ebi-a-GCST90001799	CD27 on T cell	id:ebi-a-GCST90001799	79	0.07003	0.0696046	0.314362	-0.066395	0.206455	1.07254	0.935761	1.22931
ieu-b-85.vcf	ebi-a-GCST90001799	CD27 on T cell	id:ebi-a-GCST90001799	79	-0.0898788	0.125834	0.477195	-0.336513	0.156756	0.914042	0.714256	1.16971
ieu-b-85.vcf	ebi-a-GCST90002001	CD64 on CD14- CD16-	id:ebi-a-GCST90002001	95	0.0404899	0.0313877	0.197053	-0.02103	0.10201	1.04132	0.97919	1.10739
ieu-b-85.vcf	ebi-a-GCST90002001	CD64 on CD14- CD16-	id:ebi-a-GCST90002001	95	0.110337	0.06381	0.0871017	-0.014731	0.235404	1.11665	0.985377	1.26542
ieu-b-85.vcf	ebi-a-GCST90002001	CD64 on CD14- CD16-	id:ebi-a-GCST90002001	95	0.0708971	0.0472063	0.133134	-0.0216273	0.163421	1.07347	0.978605	1.17753
ieu-b-85.vcf	ebi-a-GCST90002001	CD64 on CD14- CD16-	id:ebi-a-GCST90002001	95	0.0631084	0.0653691	0.336813	-0.0650151	0.191232	1.06514	0.937053	1.21074
ieu-b-85.vcf	ebi-a-GCST90001396	IgD+ CD38- B cell Absolute Count	id:ebi-a-GCST90001396	92	-0.0421104	0.032696	0.197768	-0.106195	0.0219738	0.958764	0.89925	1.02222
ieu-b-85.vcf	ebi-a-GCST90001396	IgD+ CD38- B cell Absolute Count	id:ebi-a-GCST90001396	92	-0.0557175	0.0659549	0.400473	-0.184989	0.0735541	0.945806	0.831113	1.07633
ieu-b-85.vcf	ebi-a-GCST90001396	IgD+ CD38- B cell Absolute Count	id:ebi-a-GCST90001396	92	-0.014288	0.0474632	0.76339	-0.107316	0.0787399	0.985814	0.898242	1.08192
ieu-b-85.vcf	ebi-a-GCST90001396	IgD+ CD38- B cell Absolute Count	id:ebi-a-GCST90001396	92	-0.0144607	0.0649495	0.82431	-0.141762	0.11284	0.985643	0.867828	1.11945
ieu-b-85.vcf	ebi-a-GCST90001574	Terminally Differentiated CD4-CD8- T cell %T cell	id:ebi-a-GCST90001574	88	0.0174474	0.033429	0.601723	-0.0480734	0.0829681	1.0176	0.953064	1.08651
ieu-b-85.vcf	ebi-a-GCST90001574	Terminally Differentiated CD4-CD8- T cell %T cell	id:ebi-a-GCST90001574	88	0.00828787	0.0676639	0.9028	-0.124333	0.140909	1.00832	0.883085	1.15132
ieu-b-85.vcf	ebi-a-GCST90001574	Terminally Differentiated CD4-CD8- T cell %T cell	id:ebi-a-GCST90001574	88	-0.00541727	0.0494883	0.912833	-0.102414	0.0915797	0.994597	0.902656	1.0959
ieu-b-85.vcf	ebi-a-GCST90001574	Terminally Differentiated CD4-CD8- T cell %T cell	id:ebi-a-GCST90001574	88	-0.0109776	0.0777343	0.888023	-0.163337	0.141382	0.989082	0.849305	1.15186
ieu-b-85.vcf	ebi-a-GCST90001497	CD39+ secreting CD4 regulatory T cell %CD4 regulatory T cell	id:ebi-a-GCST90001497	90	0.0201217	0.0330224	0.542301	-0.0446021	0.0848456	1.02033	0.956378	1.08855
ieu-b-85.vcf	ebi-a-GCST90001497	CD39+ secreting CD4 regulatory T cell %CD4 regulatory T cell	id:ebi-a-GCST90001497	90	-0.033359	0.0651442	0.609878	-0.161042	0.0943236	0.967191	0.851257	1.09892
ieu-b-85.vcf	ebi-a-GCST90001497	CD39+ secreting CD4 regulatory T cell %CD4 regulatory T cell	id:ebi-a-GCST90001497	90	0.0145774	0.0482384	0.762503	-0.0799698	0.109125	1.01468	0.923144	1.1153
ieu-b-85.vcf	ebi-a-GCST90001497	CD39+ secreting CD4 regulatory T cell %CD4 regulatory T cell	id:ebi-a-GCST90001497	90	0.0485043	0.066006	0.464365	-0.0808675	0.177876	1.0497	0.922316	1.19468
ieu-b-85.vcf	ebi-a-GCST90001802	CD27 on IgD- CD38- B cell	id:ebi-a-GCST90001802	94	-0.0311958	0.0324673	0.336634	-0.0948318	0.0324402	0.969286	0.909526	1.03297
ieu-b-85.vcf	ebi-a-GCST90001802	CD27 on IgD- CD38- B cell	id:ebi-a-GCST90001802	94	-0.00166689	0.06452	0.979445	-0.128126	0.124792	0.998334	0.879742	1.13291
ieu-b-85.vcf	ebi-a-GCST90001802	CD27 on IgD- CD38- B cell	id:ebi-a-GCST90001802	94	-0.0302263	0.0515893	0.557941	-0.131341	0.0708888	0.970226	0.876918	1.07346
ieu-b-85.vcf	ebi-a-GCST90001802	CD27 on IgD- CD38- B cell	id:ebi-a-GCST90001802	94	0.0317127	0.0746228	0.671837	-0.114548	0.177973	1.03222	0.891769	1.19479
ieu-b-85.vcf	ebi-a-GCST90002076	SSC-A on Natural Killer	id:ebi-a-GCST90002076	94	0.0251415	0.0355242	0.479115	-0.044486	0.0947689	1.02546	0.956489	1.0994
ieu-b-85.vcf	ebi-a-GCST90002076	SSC-A on Natural Killer	id:ebi-a-GCST90002076	94	0.0599309	0.0712893	0.402711	-0.079796	0.199658	1.06176	0.923305	1.22098
ieu-b-85.vcf	ebi-a-GCST90002076	SSC-A on Natural Killer	id:ebi-a-GCST90002076	94	0.060635	0.0517282	0.241123	-0.0407523	0.162022	1.06251	0.960067	1.17589
ieu-b-85.vcf	ebi-a-GCST90002076	SSC-A on Natural Killer	id:ebi-a-GCST90002076	94	0.0647494	0.0624715	0.302674	-0.0576948	0.187194	1.06689	0.943938	1.20586
ieu-b-85.vcf	ebi-a-GCST90001653	CD28- CD4-CD8- T cell %CD4-CD8- T cell	id:ebi-a-GCST90001653	89	-0.0316204	0.0337496	0.348804	-0.0977695	0.0345288	0.968874	0.906858	1.03513
ieu-b-85.vcf	ebi-a-GCST90001653	CD28- CD4-CD8- T cell %CD4-CD8- T cell	id:ebi-a-GCST90001653	89	-0.157644	0.069865	0.0265519	-0.294579	-0.0207081	0.854154	0.744845	0.979505
ieu-b-85.vcf	ebi-a-GCST90001653	CD28- CD4-CD8- T cell %CD4-CD8- T cell	id:ebi-a-GCST90001653	89	-0.066218	0.0502525	0.187602	-0.164713	0.0322769	0.935927	0.848137	1.0328
ieu-b-85.vcf	ebi-a-GCST90001653	CD28- CD4-CD8- T cell %CD4-CD8- T cell	id:ebi-a-GCST90001653	89	-0.144892	0.078018	0.0666332	-0.297807	0.00802323	0.865116	0.742444	1.00806
ieu-b-85.vcf	ebi-a-GCST90001775	CD25 on B cell	id:ebi-a-GCST90001775	90	-0.0067615	0.0325884	0.835633	-0.0706347	0.0571117	0.993261	0.931802	1.05877
ieu-b-85.vcf	ebi-a-GCST90001775	CD25 on B cell	id:ebi-a-GCST90001775	90	0.036178	0.0667798	0.589359	-0.0947105	0.167067	1.03684	0.909636	1.18183
ieu-b-85.vcf	ebi-a-GCST90001775	CD25 on B cell	id:ebi-a-GCST90001775	90	0.0185064	0.0514324	0.718982	-0.0823011	0.119314	1.01868	0.920995	1.12672
ieu-b-85.vcf	ebi-a-GCST90001775	CD25 on B cell	id:ebi-a-GCST90001775	90	0.0299822	0.0838525	0.72152	-0.134369	0.194333	1.03044	0.874268	1.2145
ieu-b-85.vcf	ebi-a-GCST90001797	CD27 on CD20- CD38- B cell	id:ebi-a-GCST90001797	93	-0.00473867	0.0313257	0.879762	-0.066137	0.0566597	0.995273	0.936003	1.0583
ieu-b-85.vcf	ebi-a-GCST90001797	CD27 on CD20- CD38- B cell	id:ebi-a-GCST90001797	93	-0.0269606	0.0629746	0.669577	-0.150391	0.0964697	0.9734	0.860372	1.10128
ieu-b-85.vcf	ebi-a-GCST90001797	CD27 on CD20- CD38- B cell	id:ebi-a-GCST90001797	93	0.0255736	0.0462456	0.580266	-0.0650677	0.116215	1.0259	0.937004	1.12324
ieu-b-85.vcf	ebi-a-GCST90001797	CD27 on CD20- CD38- B cell	id:ebi-a-GCST90001797	93	0.030675	0.0631185	0.628129	-0.0930372	0.154387	1.03115	0.91116	1.16694
ieu-b-85.vcf	ebi-a-GCST90001767	CD24 on IgD+ CD38- unswitched memory B cell	id:ebi-a-GCST90001767	80	0.0819652	0.0478433	0.0866754	-0.0118076	0.175738	1.08542	0.988262	1.19213
ieu-b-85.vcf	ebi-a-GCST90001767	CD24 on IgD+ CD38- unswitched memory B cell	id:ebi-a-GCST90001767	80	0.124648	0.0974565	0.204684	-0.0663666	0.315663	1.13275	0.935788	1.37117
ieu-b-85.vcf	ebi-a-GCST90001767	CD24 on IgD+ CD38- unswitched memory B cell	id:ebi-a-GCST90001767	80	0.147616	0.0715719	0.0391614	0.00733518	0.287897	1.15907	1.00736	1.33362
ieu-b-85.vcf	ebi-a-GCST90001767	CD24 on IgD+ CD38- unswitched memory B cell	id:ebi-a-GCST90001767	80	0.26809	0.111278	0.0183155	0.0499844	0.486195	1.30746	1.05125	1.62612
ieu-b-85.vcf	ebi-a-GCST90001964	FSC-A on plasmacytoid Dendritic Cell	id:ebi-a-GCST90001964	83	0.00388789	0.0366551	0.915529	-0.067956	0.0757318	1.0039	0.934302	1.07867
ieu-b-85.vcf	ebi-a-GCST90001964	FSC-A on plasmacytoid Dendritic Cell	id:ebi-a-GCST90001964	83	-0.00837964	0.0739998	0.910121	-0.153419	0.13666	0.991655	0.85777	1.14644
ieu-b-85.vcf	ebi-a-GCST90001964	FSC-A on plasmacytoid Dendritic Cell	id:ebi-a-GCST90001964	83	0.0278271	0.0570906	0.625961	-0.0840706	0.139725	1.02822	0.919366	1.14996
ieu-b-85.vcf	ebi-a-GCST90001964	FSC-A on plasmacytoid Dendritic Cell	id:ebi-a-GCST90001964	83	0.0531053	0.0821267	0.51968	-0.107863	0.214074	1.05454	0.897751	1.23871
ieu-b-85.vcf	ebi-a-GCST90001456	CD11c+ HLA DR++ monocyte Absolute Count	id:ebi-a-GCST90001456	87	-0.0648015	0.0356573	0.0691649	-0.13469	0.00508684	0.937253	0.873987	1.0051
ieu-b-85.vcf	ebi-a-GCST90001456	CD11c+ HLA DR++ monocyte Absolute Count	id:ebi-a-GCST90001456	87	-0.0822042	0.0719739	0.256603	-0.223273	0.0588646	0.921084	0.799896	1.06063
ieu-b-85.vcf	ebi-a-GCST90001456	CD11c+ HLA DR++ monocyte Absolute Count	id:ebi-a-GCST90001456	87	-0.0821096	0.0550495	0.135815	-0.190007	0.0257875	0.921171	0.826954	1.02612
ieu-b-85.vcf	ebi-a-GCST90001456	CD11c+ HLA DR++ monocyte Absolute Count	id:ebi-a-GCST90001456	87	-0.0895772	0.0754845	0.238616	-0.237527	0.0583725	0.914318	0.788576	1.06011
ieu-b-85.vcf	ebi-a-GCST90001962	CD25 on CD28+ CD4+ T cell	id:ebi-a-GCST90001962	26	0.0558123	0.0708791	0.431031	-0.0831108	0.194735	1.0574	0.920249	1.21499
ieu-b-85.vcf	ebi-a-GCST90001962	CD25 on CD28+ CD4+ T cell	id:ebi-a-GCST90001962	26	0.174673	0.168492	0.310214	-0.15557	0.504917	1.19086	0.855927	1.65685
ieu-b-85.vcf	ebi-a-GCST90001962	CD25 on CD28+ CD4+ T cell	id:ebi-a-GCST90001962	26	0.0430485	0.101775	0.67231	-0.15643	0.242527	1.04399	0.855192	1.27447
ieu-b-85.vcf	ebi-a-GCST90001962	CD25 on CD28+ CD4+ T cell	id:ebi-a-GCST90001962	26	0.0866686	0.135137	0.527138	-0.178199	0.351537	1.09054	0.836776	1.42125
ieu-b-85.vcf	ebi-a-GCST90001832	CD62L on CD62L+ plasmacytoid Dendritic Cell	id:ebi-a-GCST90001832	85	0.02124	0.0346474	0.539855	-0.0466689	0.0891488	1.02147	0.954403	1.09324
ieu-b-85.vcf	ebi-a-GCST90001832	CD62L on CD62L+ plasmacytoid Dendritic Cell	id:ebi-a-GCST90001832	85	0.0608634	0.0715644	0.39751	-0.0794028	0.20113	1.06275	0.923668	1.22278
ieu-b-85.vcf	ebi-a-GCST90001832	CD62L on CD62L+ plasmacytoid Dendritic Cell	id:ebi-a-GCST90001832	85	0.0636358	0.0517362	0.218695	-0.0377671	0.165039	1.0657	0.962937	1.17944
ieu-b-85.vcf	ebi-a-GCST90001832	CD62L on CD62L+ plasmacytoid Dendritic Cell	id:ebi-a-GCST90001832	85	0.10349	0.0681714	0.132749	-0.0301262	0.237106	1.10903	0.970323	1.26758
ieu-b-85.vcf	ebi-a-GCST90001719	BAFF-R on IgD+ B cell	id:ebi-a-GCST90001719	93	-0.0340627	0.0327477	0.298267	-0.0982481	0.0301227	0.966511	0.906424	1.03058
ieu-b-85.vcf	ebi-a-GCST90001719	BAFF-R on IgD+ B cell	id:ebi-a-GCST90001719	93	-0.0420037	0.0661762	0.5272	-0.171709	0.0877016	0.958866	0.842224	1.09166
ieu-b-85.vcf	ebi-a-GCST90001719	BAFF-R on IgD+ B cell	id:ebi-a-GCST90001719	93	-0.0223431	0.0518757	0.666683	-0.124019	0.0793333	0.977905	0.883363	1.08257
ieu-b-85.vcf	ebi-a-GCST90001719	BAFF-R on IgD+ B cell	id:ebi-a-GCST90001719	93	0.0291681	0.0879958	0.741043	-0.143304	0.20164	1.0296	0.866491	1.22341
ieu-b-85.vcf	ebi-a-GCST90001994	CX3CR1 on CD14- CD16-	id:ebi-a-GCST90001994	95	-0.00726229	0.0321611	0.821349	-0.070298	0.0557734	0.992764	0.932116	1.05736
ieu-b-85.vcf	ebi-a-GCST90001994	CX3CR1 on CD14- CD16-	id:ebi-a-GCST90001994	95	-0.0347077	0.0646712	0.59277	-0.161463	0.0920478	0.965888	0.850898	1.09642
ieu-b-85.vcf	ebi-a-GCST90001994	CX3CR1 on CD14- CD16-	id:ebi-a-GCST90001994	95	-0.00323258	0.0468197	0.944955	-0.0949992	0.088534	0.996773	0.909374	1.09257
ieu-b-85.vcf	ebi-a-GCST90001994	CX3CR1 on CD14- CD16-	id:ebi-a-GCST90001994	95	0.0847101	0.0832426	0.311466	-0.0784454	0.247866	1.0884	0.924553	1.28129
ieu-b-85.vcf	ebi-a-GCST90001995	CX3CR1 on monocyte	id:ebi-a-GCST90001995	87	-0.0584373	0.0333586	0.0798103	-0.12382	0.00694567	0.943237	0.883539	1.00697
ieu-b-85.vcf	ebi-a-GCST90001995	CX3CR1 on monocyte	id:ebi-a-GCST90001995	87	-0.140251	0.0669737	0.0392278	-0.271519	-0.00898233	0.86914	0.762221	0.991058
ieu-b-85.vcf	ebi-a-GCST90001995	CX3CR1 on monocyte	id:ebi-a-GCST90001995	87	-0.0703315	0.0493191	0.153854	-0.166997	0.026334	0.932085	0.846202	1.02668
ieu-b-85.vcf	ebi-a-GCST90001995	CX3CR1 on monocyte	id:ebi-a-GCST90001995	87	-0.153868	0.0628327	0.0163617	-0.27702	-0.0307155	0.857386	0.75804	0.969751
ieu-b-85.vcf	ebi-a-GCST90001905	CD86 on monocyte	id:ebi-a-GCST90001905	88	-0.0224529	0.0365826	0.539375	-0.0941547	0.049249	0.977797	0.910142	1.05048
ieu-b-85.vcf	ebi-a-GCST90001905	CD86 on monocyte	id:ebi-a-GCST90001905	88	-0.0778645	0.0735155	0.292494	-0.221955	0.066226	0.92509	0.800951	1.06847
ieu-b-85.vcf	ebi-a-GCST90001905	CD86 on monocyte	id:ebi-a-GCST90001905	88	-0.0700966	0.053158	0.187288	-0.174286	0.0340931	0.932304	0.840056	1.03468
ieu-b-85.vcf	ebi-a-GCST90001905	CD86 on monocyte	id:ebi-a-GCST90001905	88	-0.0876951	0.0685502	0.204199	-0.222053	0.0466632	0.91604	0.800873	1.04777
ieu-b-85.vcf	ebi-a-GCST90001702	BAFF-R on CD24+ CD27+ B cell	id:ebi-a-GCST90001702	91	0.0100135	0.0335696	0.765481	-0.055783	0.07581	1.01006	0.945744	1.07876
ieu-b-85.vcf	ebi-a-GCST90001702	BAFF-R on CD24+ CD27+ B cell	id:ebi-a-GCST90001702	91	0.0297167	0.0688852	0.667225	-0.105298	0.164732	1.03016	0.900056	1.17908
ieu-b-85.vcf	ebi-a-GCST90001702	BAFF-R on CD24+ CD27+ B cell	id:ebi-a-GCST90001702	91	0.0115364	0.0524688	0.825972	-0.0913025	0.114375	1.0116	0.912742	1.12117
ieu-b-85.vcf	ebi-a-GCST90001702	BAFF-R on CD24+ CD27+ B cell	id:ebi-a-GCST90001702	91	0.0175815	0.0738155	0.812282	-0.127097	0.16226	1.01774	0.880648	1.17617
ieu-b-85.vcf	ebi-a-GCST90001471	CD62L- plasmacytoid Dendritic Cell %Dendritic Cell	id:ebi-a-GCST90001471	93	0.0148	0.0320087	0.643813	-0.047937	0.077537	1.01491	0.953194	1.08062
ieu-b-85.vcf	ebi-a-GCST90001471	CD62L- plasmacytoid Dendritic Cell %Dendritic Cell	id:ebi-a-GCST90001471	93	0.0421757	0.0657574	0.522886	-0.0867089	0.17106	1.04308	0.916944	1.18656
ieu-b-85.vcf	ebi-a-GCST90001471	CD62L- plasmacytoid Dendritic Cell %Dendritic Cell	id:ebi-a-GCST90001471	93	0.0420812	0.0482792	0.383414	-0.0525459	0.136708	1.04298	0.948811	1.14649
ieu-b-85.vcf	ebi-a-GCST90001471	CD62L- plasmacytoid Dendritic Cell %Dendritic Cell	id:ebi-a-GCST90001471	93	0.0316521	0.0718841	0.660737	-0.109241	0.172545	1.03216	0.896515	1.18833
ieu-b-85.vcf	ebi-a-GCST90002050	CD45 on CD33dim HLA DR-	id:ebi-a-GCST90002050	62	-0.0249807	0.0551491	0.650572	-0.133073	0.0831115	0.975329	0.875401	1.08666
ieu-b-85.vcf	ebi-a-GCST90002050	CD45 on CD33dim HLA DR-	id:ebi-a-GCST90002050	62	-0.12816	0.103179	0.219028	-0.33039	0.0740708	0.879713	0.718643	1.07688
ieu-b-85.vcf	ebi-a-GCST90002050	CD45 on CD33dim HLA DR-	id:ebi-a-GCST90002050	62	-0.00166996	0.0814084	0.983634	-0.16123	0.157891	0.998331	0.851096	1.17104
ieu-b-85.vcf	ebi-a-GCST90002050	CD45 on CD33dim HLA DR-	id:ebi-a-GCST90002050	62	-0.0194454	0.121659	0.873539	-0.257898	0.219007	0.980742	0.772674	1.24484
ieu-b-85.vcf	ebi-a-GCST90001718	BAFF-R on switched memory B cell	id:ebi-a-GCST90001718	90	0.00340078	0.0338279	0.919922	-0.0629018	0.0697034	1.00341	0.939036	1.07219
ieu-b-85.vcf	ebi-a-GCST90001718	BAFF-R on switched memory B cell	id:ebi-a-GCST90001718	90	0.0517842	0.0694517	0.457887	-0.0843411	0.187909	1.05315	0.919118	1.20672
ieu-b-85.vcf	ebi-a-GCST90001718	BAFF-R on switched memory B cell	id:ebi-a-GCST90001718	90	-0.00965323	0.0508284	0.849373	-0.109277	0.0899704	0.990393	0.896482	1.09414
ieu-b-85.vcf	ebi-a-GCST90001718	BAFF-R on switched memory B cell	id:ebi-a-GCST90001718	90	-0.00900915	0.0685409	0.895722	-0.143349	0.125331	0.991031	0.866451	1.13352
ieu-b-85.vcf	ebi-a-GCST90001632	CD8+ Natural Killer T %lymphocyte	id:ebi-a-GCST90001632	95	0.02633	0.0329659	0.424462	-0.0382832	0.0909431	1.02668	0.96244	1.09521
ieu-b-85.vcf	ebi-a-GCST90001632	CD8+ Natural Killer T %lymphocyte	id:ebi-a-GCST90001632	95	-0.0455204	0.0671687	0.499642	-0.177171	0.0861301	0.9555	0.837637	1.08995
ieu-b-85.vcf	ebi-a-GCST90001632	CD8+ Natural Killer T %lymphocyte	id:ebi-a-GCST90001632	95	-0.0305485	0.0497795	0.53943	-0.128116	0.0670194	0.969913	0.879751	1.06932
ieu-b-85.vcf	ebi-a-GCST90001632	CD8+ Natural Killer T %lymphocyte	id:ebi-a-GCST90001632	95	-0.070005	0.0665447	0.295496	-0.200433	0.0604225	0.932389	0.818377	1.06229
ieu-b-85.vcf	ebi-a-GCST90001564	Central Memory CD4-CD8- T cell %CD4-CD8- T cell	id:ebi-a-GCST90001564	100	-0.00879774	0.0296219	0.766465	-0.0668566	0.0492612	0.991241	0.935329	1.05049
ieu-b-85.vcf	ebi-a-GCST90001564	Central Memory CD4-CD8- T cell %CD4-CD8- T cell	id:ebi-a-GCST90001564	100	0.0269781	0.0599662	0.653785	-0.0905556	0.144512	1.02735	0.913424	1.15548
ieu-b-85.vcf	ebi-a-GCST90001564	Central Memory CD4-CD8- T cell %CD4-CD8- T cell	id:ebi-a-GCST90001564	100	-0.0239862	0.0426987	0.574283	-0.107676	0.0597032	0.976299	0.897919	1.06152
ieu-b-85.vcf	ebi-a-GCST90001564	Central Memory CD4-CD8- T cell %CD4-CD8- T cell	id:ebi-a-GCST90001564	100	-0.0310232	0.0668108	0.64342	-0.161972	0.099926	0.969453	0.850465	1.10509
ieu-b-85.vcf	ebi-a-GCST90001400	IgD+ B cell Absolute Count	id:ebi-a-GCST90001400	92	-0.0151397	0.0321739	0.637956	-0.0782007	0.0479212	0.984974	0.924779	1.04909
ieu-b-85.vcf	ebi-a-GCST90001400	IgD+ B cell Absolute Count	id:ebi-a-GCST90001400	92	-0.00528934	0.0649906	0.935316	-0.132671	0.122092	0.994725	0.875753	1.12986
ieu-b-85.vcf	ebi-a-GCST90001400	IgD+ B cell Absolute Count	id:ebi-a-GCST90001400	92	-0.0287476	0.0488415	0.556137	-0.124477	0.0669818	0.971662	0.882959	1.06928
ieu-b-85.vcf	ebi-a-GCST90001400	IgD+ B cell Absolute Count	id:ebi-a-GCST90001400	92	-0.0265709	0.0707422	0.708087	-0.165226	0.112084	0.973779	0.847702	1.11861
ieu-b-85.vcf	ebi-a-GCST90001999	PDL-1 on CD14- CD16+ monocyte	id:ebi-a-GCST90001999	94	-0.012862	0.0326733	0.693836	-0.0769017	0.0511777	0.98722	0.925981	1.05251
ieu-b-85.vcf	ebi-a-GCST90001999	PDL-1 on CD14- CD16+ monocyte	id:ebi-a-GCST90001999	94	-0.0390818	0.0660722	0.555635	-0.168583	0.0904197	0.961672	0.844861	1.09463
ieu-b-85.vcf	ebi-a-GCST90001999	PDL-1 on CD14- CD16+ monocyte	id:ebi-a-GCST90001999	94	-0.0291192	0.0478524	0.542842	-0.12291	0.0646716	0.971301	0.884343	1.06681
ieu-b-85.vcf	ebi-a-GCST90001999	PDL-1 on CD14- CD16+ monocyte	id:ebi-a-GCST90001999	94	-0.0451183	0.0661814	0.4971	-0.174834	0.0845973	0.955884	0.839596	1.08828
ieu-b-85.vcf	ebi-a-GCST90001776	CD25 on CD20- CD38- B cell	id:ebi-a-GCST90001776	90	0.0108304	0.0322932	0.737342	-0.0524644	0.0741251	1.01089	0.948888	1.07694
ieu-b-85.vcf	ebi-a-GCST90001776	CD25 on CD20- CD38- B cell	id:ebi-a-GCST90001776	90	0.00553089	0.0646368	0.932004	-0.121157	0.132219	1.00555	0.885895	1.14136
ieu-b-85.vcf	ebi-a-GCST90001776	CD25 on CD20- CD38- B cell	id:ebi-a-GCST90001776	90	0.00360063	0.0487063	0.94107	-0.0918636	0.0990649	1.00361	0.91223	1.10414
ieu-b-85.vcf	ebi-a-GCST90001776	CD25 on CD20- CD38- B cell	id:ebi-a-GCST90001776	90	-0.0189866	0.0681763	0.78128	-0.152612	0.114639	0.981193	0.858463	1.12147
ieu-b-85.vcf	ebi-a-GCST90001740	CD19 on switched memory B cell	id:ebi-a-GCST90001740	92	-0.0229893	0.0325884	0.480534	-0.0868627	0.0408841	0.977273	0.916803	1.04173
ieu-b-85.vcf	ebi-a-GCST90001740	CD19 on switched memory B cell	id:ebi-a-GCST90001740	92	0.0217597	0.0648041	0.73782	-0.105256	0.148776	1.022	0.900094	1.16041
ieu-b-85.vcf	ebi-a-GCST90001740	CD19 on switched memory B cell	id:ebi-a-GCST90001740	92	-0.0387711	0.0485288	0.424331	-0.133888	0.0563454	0.961971	0.874688	1.05796
ieu-b-85.vcf	ebi-a-GCST90001740	CD19 on switched memory B cell	id:ebi-a-GCST90001740	92	-0.0461649	0.065655	0.483761	-0.174849	0.0825189	0.954885	0.839584	1.08602
ieu-b-85.vcf	ebi-a-GCST90001947	CD33 on CD33+ HLA DR+ CD14dim	id:ebi-a-GCST90001947	78	-0.021968	0.0505165	0.663658	-0.12098	0.0770444	0.978272	0.886051	1.08009
ieu-b-85.vcf	ebi-a-GCST90001947	CD33 on CD33+ HLA DR+ CD14dim	id:ebi-a-GCST90001947	78	-0.135846	0.102283	0.188109	-0.336321	0.0646295	0.872977	0.714394	1.06676
ieu-b-85.vcf	ebi-a-GCST90001947	CD33 on CD33+ HLA DR+ CD14dim	id:ebi-a-GCST90001947	78	0.00550119	0.0726386	0.939631	-0.136871	0.147873	1.00552	0.872083	1.15937
ieu-b-85.vcf	ebi-a-GCST90001947	CD33 on CD33+ HLA DR+ CD14dim	id:ebi-a-GCST90001947	78	-0.0095625	0.100881	0.924728	-0.207289	0.188164	0.990483	0.812784	1.20703
ieu-b-85.vcf	ebi-a-GCST90001909	CD45 on CD14+ monocyte	id:ebi-a-GCST90001909	80	-0.0146921	0.0362635	0.685369	-0.0857685	0.0563843	0.985415	0.917807	1.058
ieu-b-85.vcf	ebi-a-GCST90001909	CD45 on CD14+ monocyte	id:ebi-a-GCST90001909	80	-0.0423575	0.0717419	0.556619	-0.182972	0.0982567	0.958527	0.832792	1.10325
ieu-b-85.vcf	ebi-a-GCST90001909	CD45 on CD14+ monocyte	id:ebi-a-GCST90001909	80	-0.0237722	0.0560197	0.671307	-0.133571	0.0860264	0.976508	0.874966	1.08984
ieu-b-85.vcf	ebi-a-GCST90001909	CD45 on CD14+ monocyte	id:ebi-a-GCST90001909	80	-0.00559785	0.0722561	0.938444	-0.14722	0.136024	0.994418	0.863104	1.14571
ieu-b-85.vcf	ebi-a-GCST90001473	CD62L- CD86+ myeloid Dendritic Cell %Dendritic Cell	id:ebi-a-GCST90001473	95	0.00921963	0.0339449	0.785925	-0.0573124	0.0757517	1.00926	0.944299	1.07869
ieu-b-85.vcf	ebi-a-GCST90001473	CD62L- CD86+ myeloid Dendritic Cell %Dendritic Cell	id:ebi-a-GCST90001473	95	-0.0425797	0.0675182	0.529823	-0.174915	0.089756	0.958314	0.839528	1.09391
ieu-b-85.vcf	ebi-a-GCST90001473	CD62L- CD86+ myeloid Dendritic Cell %Dendritic Cell	id:ebi-a-GCST90001473	95	-0.0155508	0.0500558	0.756052	-0.11366	0.0825586	0.984569	0.892561	1.08606
ieu-b-85.vcf	ebi-a-GCST90001473	CD62L- CD86+ myeloid Dendritic Cell %Dendritic Cell	id:ebi-a-GCST90001473	95	-0.00921976	0.0619616	0.882032	-0.130664	0.112225	0.990823	0.877512	1.11876
ieu-b-85.vcf	ebi-a-GCST90002045	CD45 on CD33- HLA DR-	id:ebi-a-GCST90002045	75	-0.042941	0.0499323	0.389798	-0.140808	0.0549263	0.957968	0.868656	1.05646
ieu-b-85.vcf	ebi-a-GCST90002045	CD45 on CD33- HLA DR-	id:ebi-a-GCST90002045	75	-0.0508354	0.0980017	0.605525	-0.242919	0.141248	0.950435	0.784335	1.15171
ieu-b-85.vcf	ebi-a-GCST90002045	CD45 on CD33- HLA DR-	id:ebi-a-GCST90002045	75	-0.0243196	0.072611	0.737678	-0.166637	0.117998	0.975974	0.846507	1.12524
ieu-b-85.vcf	ebi-a-GCST90002045	CD45 on CD33- HLA DR-	id:ebi-a-GCST90002045	75	-1.88e-05	0.10438	0.999857	-0.204604	0.204567	0.999981	0.81497	1.22699
ieu-b-85.vcf	ebi-a-GCST90002046	CD45 on CD33- HLA DR+	id:ebi-a-GCST90002046	75	0.0418148	0.0487308	0.390849	-0.0536975	0.137327	1.0427	0.947719	1.1472
ieu-b-85.vcf	ebi-a-GCST90002046	CD45 on CD33- HLA DR+	id:ebi-a-GCST90002046	75	0.127143	0.100007	0.207644	-0.0688709	0.323157	1.13558	0.933447	1.38148
ieu-b-85.vcf	ebi-a-GCST90002046	CD45 on CD33- HLA DR+	id:ebi-a-GCST90002046	75	0.0796356	0.0688126	0.247157	-0.0552371	0.214508	1.08289	0.946261	1.23925
ieu-b-85.vcf	ebi-a-GCST90002046	CD45 on CD33- HLA DR+	id:ebi-a-GCST90002046	75	0.119366	0.0984432	0.229162	-0.0735822	0.312315	1.12678	0.92906	1.36659
ieu-b-85.vcf	ebi-a-GCST90002068	CD4 on secreting CD4 regulatory T cell	id:ebi-a-GCST90002068	89	-0.023011	0.0366594	0.530203	-0.0948634	0.0488415	0.977252	0.909497	1.05005
ieu-b-85.vcf	ebi-a-GCST90002068	CD4 on secreting CD4 regulatory T cell	id:ebi-a-GCST90002068	89	-0.0657963	0.0732324	0.371421	-0.209332	0.0777392	0.936322	0.811126	1.08084
ieu-b-85.vcf	ebi-a-GCST90002068	CD4 on secreting CD4 regulatory T cell	id:ebi-a-GCST90002068	89	-0.103975	0.0548171	0.0578596	-0.211416	0.00346661	0.901248	0.809437	1.00347
ieu-b-85.vcf	ebi-a-GCST90002068	CD4 on secreting CD4 regulatory T cell	id:ebi-a-GCST90002068	89	-0.142364	0.0739234	0.0573534	-0.287254	0.00252544	0.867305	0.750321	1.00253
ieu-b-85.vcf	ebi-a-GCST90001514	Hematopoietic Stem Cell Absolute Count	id:ebi-a-GCST90001514	83	0.0644561	0.0440846	0.143714	-0.0219498	0.150862	1.06658	0.978289	1.16284
ieu-b-85.vcf	ebi-a-GCST90001514	Hematopoietic Stem Cell Absolute Count	id:ebi-a-GCST90001514	83	0.0979592	0.0879525	0.26867	-0.0744277	0.270346	1.10292	0.928275	1.31042
ieu-b-85.vcf	ebi-a-GCST90001514	Hematopoietic Stem Cell Absolute Count	id:ebi-a-GCST90001514	83	0.0874828	0.0622366	0.159829	-0.034501	0.209467	1.09142	0.966087	1.23302
ieu-b-85.vcf	ebi-a-GCST90001514	Hematopoietic Stem Cell Absolute Count	id:ebi-a-GCST90001514	83	0.127313	0.0872893	0.148517	-0.0437737	0.2984	1.13577	0.957171	1.3477
ieu-b-85.vcf	ebi-a-GCST90002065	CD4 on CD39+ resting CD4 regulatory T cell	id:ebi-a-GCST90002065	77	-0.0143829	0.0371102	0.698332	-0.0871188	0.058353	0.98572	0.916568	1.06009
ieu-b-85.vcf	ebi-a-GCST90002065	CD4 on CD39+ resting CD4 regulatory T cell	id:ebi-a-GCST90002065	77	-0.00328849	0.0735513	0.964457	-0.147449	0.140872	0.996717	0.862906	1.15128
ieu-b-85.vcf	ebi-a-GCST90002065	CD4 on CD39+ resting CD4 regulatory T cell	id:ebi-a-GCST90002065	77	-0.0051425	0.0561108	0.926977	-0.11512	0.104835	0.994871	0.891259	1.11053
ieu-b-85.vcf	ebi-a-GCST90002065	CD4 on CD39+ resting CD4 regulatory T cell	id:ebi-a-GCST90002065	77	-0.0191013	0.0804457	0.812951	-0.176775	0.138572	0.98108	0.837968	1.14863
ieu-b-85.vcf	ebi-a-GCST90002101	CD45RA on Terminally Differentiated CD8+ T cell	id:ebi-a-GCST90002101	96	-0.00194733	0.0349913	0.955619	-0.0705302	0.0666356	0.998055	0.9319	1.06891
ieu-b-85.vcf	ebi-a-GCST90002101	CD45RA on Terminally Differentiated CD8+ T cell	id:ebi-a-GCST90002101	96	0.0130329	0.071724	0.856202	-0.127546	0.153612	1.01312	0.880253	1.16604
ieu-b-85.vcf	ebi-a-GCST90002101	CD45RA on Terminally Differentiated CD8+ T cell	id:ebi-a-GCST90002101	96	0.025053	0.0523306	0.63212	-0.077515	0.127621	1.02537	0.925413	1.13612
ieu-b-85.vcf	ebi-a-GCST90002101	CD45RA on Terminally Differentiated CD8+ T cell	id:ebi-a-GCST90002101	96	0.0401378	0.0686379	0.560084	-0.0943924	0.174668	1.04095	0.909926	1.19085
ieu-b-85.vcf	ebi-a-GCST90001779	CD25 on IgD+ CD24- B cell	id:ebi-a-GCST90001779	92	-0.00402102	0.0323197	0.900987	-0.0673676	0.0593255	0.995987	0.934851	1.06112
ieu-b-85.vcf	ebi-a-GCST90001779	CD25 on IgD+ CD24- B cell	id:ebi-a-GCST90001779	92	-0.0115705	0.0652778	0.85971	-0.139515	0.116374	0.988496	0.86978	1.12342
ieu-b-85.vcf	ebi-a-GCST90001779	CD25 on IgD+ CD24- B cell	id:ebi-a-GCST90001779	92	-0.0342691	0.0491913	0.486023	-0.130684	0.062146	0.966311	0.877495	1.06412
ieu-b-85.vcf	ebi-a-GCST90001779	CD25 on IgD+ CD24- B cell	id:ebi-a-GCST90001779	92	-0.0550247	0.0714588	0.443282	-0.195084	0.0850345	0.946462	0.822766	1.08875
ieu-b-85.vcf	ebi-a-GCST90002072	SSC-A on plasmacytoid Dendritic Cell	id:ebi-a-GCST90002072	86	0.0271092	0.036312	0.455327	-0.0440623	0.0982806	1.02748	0.956894	1.10327
ieu-b-85.vcf	ebi-a-GCST90002072	SSC-A on plasmacytoid Dendritic Cell	id:ebi-a-GCST90002072	86	0.0460011	0.0731326	0.53105	-0.0973388	0.189341	1.04708	0.907249	1.20845
ieu-b-85.vcf	ebi-a-GCST90002072	SSC-A on plasmacytoid Dendritic Cell	id:ebi-a-GCST90002072	86	0.0531005	0.0552129	0.33618	-0.0551168	0.161318	1.05454	0.946375	1.17506
ieu-b-85.vcf	ebi-a-GCST90002072	SSC-A on plasmacytoid Dendritic Cell	id:ebi-a-GCST90002072	86	0.0817297	0.0818964	0.32113	-0.0787874	0.242247	1.08516	0.924236	1.27411
ieu-b-85.vcf	ebi-a-GCST90001511	CD25++ CD45RA- CD4 not regulatory T cell %CD4+ T cell	id:ebi-a-GCST90001511	91	-0.00787942	0.033213	0.812472	-0.072977	0.0572181	0.992152	0.929622	1.05889
ieu-b-85.vcf	ebi-a-GCST90001511	CD25++ CD45RA- CD4 not regulatory T cell %CD4+ T cell	id:ebi-a-GCST90001511	91	0.00861519	0.0665988	0.897365	-0.121918	0.139149	1.00865	0.885221	1.1493
ieu-b-85.vcf	ebi-a-GCST90001511	CD25++ CD45RA- CD4 not regulatory T cell %CD4+ T cell	id:ebi-a-GCST90001511	91	0.00206725	0.0498888	0.966947	-0.0957148	0.0998493	1.00207	0.908723	1.105
ieu-b-85.vcf	ebi-a-GCST90001511	CD25++ CD45RA- CD4 not regulatory T cell %CD4+ T cell	id:ebi-a-GCST90001511	91	0.078214	0.0868957	0.370474	-0.0921016	0.24853	1.08135	0.912013	1.28214
ieu-b-85.vcf	ebi-a-GCST90001970	FSC-A on HLA DR+ Natural Killer	id:ebi-a-GCST90001970	96	0.00110826	0.0353856	0.975015	-0.0682475	0.070464	1.00111	0.934029	1.07301
ieu-b-85.vcf	ebi-a-GCST90001970	FSC-A on HLA DR+ Natural Killer	id:ebi-a-GCST90001970	96	0.0565849	0.0706916	0.42547	-0.0819707	0.195141	1.05822	0.921299	1.21548
ieu-b-85.vcf	ebi-a-GCST90001970	FSC-A on HLA DR+ Natural Killer	id:ebi-a-GCST90001970	96	0.0316923	0.0528984	0.549095	-0.0719885	0.135373	1.0322	0.930542	1.14496
ieu-b-85.vcf	ebi-a-GCST90001970	FSC-A on HLA DR+ Natural Killer	id:ebi-a-GCST90001970	96	0.0676243	0.0710114	0.343361	-0.0715581	0.206807	1.06996	0.930942	1.22974
ieu-b-85.vcf	ebi-a-GCST90001568	Naive CD4-CD8- T cell %T cell	id:ebi-a-GCST90001568	96	0.00403882	0.02668	0.879676	-0.048254	0.0563317	1.00405	0.952892	1.05795
ieu-b-85.vcf	ebi-a-GCST90001568	Naive CD4-CD8- T cell %T cell	id:ebi-a-GCST90001568	96	0.00989449	0.0541258	0.855344	-0.0961921	0.115981	1.00994	0.908289	1.12297
ieu-b-85.vcf	ebi-a-GCST90001568	Naive CD4-CD8- T cell %T cell	id:ebi-a-GCST90001568	96	0.00215299	0.0414972	0.958622	-0.0791815	0.0834875	1.00216	0.923872	1.08707
ieu-b-85.vcf	ebi-a-GCST90001568	Naive CD4-CD8- T cell %T cell	id:ebi-a-GCST90001568	96	-0.0453448	0.0661249	0.494545	-0.17495	0.0842601	0.955668	0.839499	1.08791
ieu-b-85.vcf	ebi-a-GCST90001642	B cell Absolute Count	id:ebi-a-GCST90001642	92	-0.0217512	0.0321073	0.498118	-0.0846816	0.0411791	0.978484	0.918805	1.04204
ieu-b-85.vcf	ebi-a-GCST90001642	B cell Absolute Count	id:ebi-a-GCST90001642	92	-0.077129	0.0656417	0.243094	-0.205787	0.0515287	0.92577	0.814007	1.05288
ieu-b-85.vcf	ebi-a-GCST90001642	B cell Absolute Count	id:ebi-a-GCST90001642	92	-0.0475862	0.0498579	0.339863	-0.145308	0.0501354	0.953528	0.864756	1.05141
ieu-b-85.vcf	ebi-a-GCST90001642	B cell Absolute Count	id:ebi-a-GCST90001642	92	-0.121413	0.0838742	0.151175	-0.285807	0.0429801	0.885668	0.751408	1.04392
ieu-b-85.vcf	ebi-a-GCST90001837	CD66b on Granulocytic Myeloid-Derived Suppressor Cells	id:ebi-a-GCST90001837	69	0.0303205	0.0569122	0.594201	-0.0812275	0.141868	1.03078	0.921984	1.15243
ieu-b-85.vcf	ebi-a-GCST90001837	CD66b on Granulocytic Myeloid-Derived Suppressor Cells	id:ebi-a-GCST90001837	69	0.00686582	0.116111	0.953023	-0.220712	0.234444	1.00689	0.801948	1.26421
ieu-b-85.vcf	ebi-a-GCST90001837	CD66b on Granulocytic Myeloid-Derived Suppressor Cells	id:ebi-a-GCST90001837	69	0.0166831	0.0813304	0.837473	-0.142725	0.176091	1.01682	0.866993	1.19255
ieu-b-85.vcf	ebi-a-GCST90001837	CD66b on Granulocytic Myeloid-Derived Suppressor Cells	id:ebi-a-GCST90001837	69	-0.056402	0.103893	0.588985	-0.260033	0.147229	0.945159	0.771026	1.15862
ieu-b-85.vcf	ebi-a-GCST90001827	IgD on IgD+ B cell	id:ebi-a-GCST90001827	85	-0.0208888	0.0334743	0.53261	-0.0864984	0.0447208	0.979328	0.917137	1.04574
ieu-b-85.vcf	ebi-a-GCST90001827	IgD on IgD+ B cell	id:ebi-a-GCST90001827	85	-0.0937429	0.0676544	0.169577	-0.226346	0.0388598	0.910517	0.797442	1.03962
ieu-b-85.vcf	ebi-a-GCST90001827	IgD on IgD+ B cell	id:ebi-a-GCST90001827	85	-0.0189096	0.0537972	0.725214	-0.124352	0.0865328	0.981268	0.883069	1.09039
ieu-b-85.vcf	ebi-a-GCST90001827	IgD on IgD+ B cell	id:ebi-a-GCST90001827	85	0.0366002	0.114604	0.750244	-0.188023	0.261223	1.03728	0.828596	1.29852
ieu-b-85.vcf	ebi-a-GCST90001769	CD24 on IgD- CD38- B cell	id:ebi-a-GCST90001769	92	-0.0465142	0.0327801	0.155906	-0.110763	0.0177348	0.954551	0.895151	1.01789
ieu-b-85.vcf	ebi-a-GCST90001769	CD24 on IgD- CD38- B cell	id:ebi-a-GCST90001769	92	0.0223552	0.0661389	0.736147	-0.107277	0.151987	1.02261	0.898277	1.16415
ieu-b-85.vcf	ebi-a-GCST90001769	CD24 on IgD- CD38- B cell	id:ebi-a-GCST90001769	92	-0.0483728	0.0486127	0.319705	-0.143654	0.0469082	0.952779	0.866188	1.04803
ieu-b-85.vcf	ebi-a-GCST90001769	CD24 on IgD- CD38- B cell	id:ebi-a-GCST90001769	92	-0.0533953	0.0603977	0.378993	-0.171775	0.0649842	0.948005	0.842169	1.06714
ieu-b-85.vcf	ebi-a-GCST90002018	CCR2 on granulocyte	id:ebi-a-GCST90002018	90	-0.0293273	0.0364595	0.421177	-0.100788	0.0421333	0.971099	0.904125	1.04303
ieu-b-85.vcf	ebi-a-GCST90002018	CCR2 on granulocyte	id:ebi-a-GCST90002018	90	-0.0901536	0.0732733	0.221836	-0.233769	0.0534621	0.913791	0.791544	1.05492
ieu-b-85.vcf	ebi-a-GCST90002018	CCR2 on granulocyte	id:ebi-a-GCST90002018	90	-0.0320916	0.0561538	0.567665	-0.142153	0.0779699	0.968418	0.867488	1.08109
ieu-b-85.vcf	ebi-a-GCST90002018	CCR2 on granulocyte	id:ebi-a-GCST90002018	90	-0.141919	0.0876837	0.109086	-0.313779	0.029941	0.867692	0.73068	1.03039
ieu-b-85.vcf	ebi-a-GCST90001603	T cell Absolute Count	id:ebi-a-GCST90001603	101	-0.0251287	0.0311102	0.419245	-0.0861046	0.0358473	0.975184	0.917498	1.0365
ieu-b-85.vcf	ebi-a-GCST90001603	T cell Absolute Count	id:ebi-a-GCST90001603	101	-0.0883582	0.0623781	0.159769	-0.210619	0.0339027	0.915433	0.810082	1.03448
ieu-b-85.vcf	ebi-a-GCST90001603	T cell Absolute Count	id:ebi-a-GCST90001603	101	-0.0333227	0.0469736	0.478081	-0.125391	0.0587456	0.967226	0.882152	1.06051
ieu-b-85.vcf	ebi-a-GCST90001603	T cell Absolute Count	id:ebi-a-GCST90001603	101	-0.0523073	0.0605028	0.389359	-0.170893	0.0662782	0.949037	0.842912	1.06852
ieu-b-85.vcf	ebi-a-GCST90001677	CD28- CD25++ CD8+ T cell %CD8+ T cell	id:ebi-a-GCST90001677	88	-0.0409917	0.0313259	0.190686	-0.10239	0.0204072	0.959837	0.902677	1.02062
ieu-b-85.vcf	ebi-a-GCST90001677	CD28- CD25++ CD8+ T cell %CD8+ T cell	id:ebi-a-GCST90001677	88	-0.0792309	0.0643519	0.2216	-0.205361	0.0468989	0.923827	0.814354	1.04802
ieu-b-85.vcf	ebi-a-GCST90001677	CD28- CD25++ CD8+ T cell %CD8+ T cell	id:ebi-a-GCST90001677	88	-0.0394961	0.0462424	0.393045	-0.130131	0.0511391	0.961274	0.87798	1.05247
ieu-b-85.vcf	ebi-a-GCST90001677	CD28- CD25++ CD8+ T cell %CD8+ T cell	id:ebi-a-GCST90001677	88	-0.065877	0.0775299	0.397826	-0.217836	0.0860817	0.936246	0.804258	1.0899
ieu-b-85.vcf	ebi-a-GCST90002011	CD64 on CD14+ CD16+ monocyte	id:ebi-a-GCST90002011	93	0.00683884	0.0325052	0.833362	-0.0568714	0.0705491	1.00686	0.944716	1.0731
ieu-b-85.vcf	ebi-a-GCST90002011	CD64 on CD14+ CD16+ monocyte	id:ebi-a-GCST90002011	93	0.0328113	0.066176	0.621217	-0.0968936	0.162516	1.03336	0.907653	1.17647
ieu-b-85.vcf	ebi-a-GCST90002011	CD64 on CD14+ CD16+ monocyte	id:ebi-a-GCST90002011	93	-0.00240879	0.0493976	0.961108	-0.099228	0.0944105	0.997594	0.905536	1.09901
ieu-b-85.vcf	ebi-a-GCST90002011	CD64 on CD14+ CD16+ monocyte	id:ebi-a-GCST90002011	93	0.0449353	0.0620565	0.47084	-0.0766954	0.166566	1.04596	0.926172	1.18124
ieu-b-85.vcf	ebi-a-GCST90001430	IgD+ CD38dim B cell %lymphocyte	id:ebi-a-GCST90001430	98	0.00807376	0.0316495	0.798647	-0.0539593	0.0701068	1.00811	0.947471	1.07262
ieu-b-85.vcf	ebi-a-GCST90001430	IgD+ CD38dim B cell %lymphocyte	id:ebi-a-GCST90001430	98	-0.0293455	0.0637961	0.646564	-0.154386	0.0956949	0.971081	0.856941	1.10042
ieu-b-85.vcf	ebi-a-GCST90001430	IgD+ CD38dim B cell %lymphocyte	id:ebi-a-GCST90001430	98	0.00526536	0.0487857	0.914052	-0.0903545	0.100885	1.00528	0.913607	1.10615
ieu-b-85.vcf	ebi-a-GCST90001430	IgD+ CD38dim B cell %lymphocyte	id:ebi-a-GCST90001430	98	-0.00249798	0.0729182	0.972742	-0.145418	0.140422	0.997505	0.864661	1.15076
ieu-b-85.vcf	ebi-a-GCST90001541	Naive CD4+ T cell %CD4+ T cell	id:ebi-a-GCST90001541	94	-0.0109195	0.030076	0.716557	-0.0698686	0.0480295	0.98914	0.932516	1.0492
ieu-b-85.vcf	ebi-a-GCST90001541	Naive CD4+ T cell %CD4+ T cell	id:ebi-a-GCST90001541	94	0.00959521	0.0603335	0.873989	-0.108658	0.127849	1.00964	0.897037	1.13638
ieu-b-85.vcf	ebi-a-GCST90001541	Naive CD4+ T cell %CD4+ T cell	id:ebi-a-GCST90001541	94	-0.00500459	0.0450667	0.911578	-0.0933353	0.0833261	0.995008	0.910888	1.0869
ieu-b-85.vcf	ebi-a-GCST90001541	Naive CD4+ T cell %CD4+ T cell	id:ebi-a-GCST90001541	94	0.0122986	0.0567086	0.828782	-0.0988503	0.123448	1.01237	0.905878	1.13139
ieu-b-85.vcf	ebi-a-GCST90001735	CD19 on IgD- CD38dim B cell	id:ebi-a-GCST90001735	96	-0.0188009	0.0321011	0.558093	-0.0817191	0.0441173	0.981375	0.921531	1.0451
ieu-b-85.vcf	ebi-a-GCST90001735	CD19 on IgD- CD38dim B cell	id:ebi-a-GCST90001735	96	-0.0075088	0.0641143	0.907018	-0.133173	0.118155	0.992519	0.875314	1.12542
ieu-b-85.vcf	ebi-a-GCST90001735	CD19 on IgD- CD38dim B cell	id:ebi-a-GCST90001735	96	-0.0456208	0.0476852	0.338714	-0.139084	0.0478421	0.955404	0.870155	1.04901
ieu-b-85.vcf	ebi-a-GCST90001735	CD19 on IgD- CD38dim B cell	id:ebi-a-GCST90001735	96	-0.0653062	0.0708941	0.359289	-0.204259	0.0736461	0.936781	0.815252	1.07643
ieu-b-85.vcf	ebi-a-GCST90001624	HLA DR+ CD4+ T cell Absolute Count	id:ebi-a-GCST90001624	89	-0.00707147	0.0319886	0.825044	-0.0697692	0.0556262	0.992953	0.932609	1.0572
ieu-b-85.vcf	ebi-a-GCST90001624	HLA DR+ CD4+ T cell Absolute Count	id:ebi-a-GCST90001624	89	-0.063766	0.0650856	0.329939	-0.191334	0.0638019	0.938225	0.825857	1.06588
ieu-b-85.vcf	ebi-a-GCST90001624	HLA DR+ CD4+ T cell Absolute Count	id:ebi-a-GCST90001624	89	-0.026332	0.0475191	0.579487	-0.119469	0.0668055	0.974012	0.887391	1.06909
ieu-b-85.vcf	ebi-a-GCST90001624	HLA DR+ CD4+ T cell Absolute Count	id:ebi-a-GCST90001624	89	-0.0851773	0.0643989	0.189378	-0.211399	0.0410444	0.918349	0.809451	1.0419
ieu-b-85.vcf	ebi-a-GCST90001641	CD3- lymphocyte %leukocyte	id:ebi-a-GCST90001641	92	-0.0531034	0.0335099	0.113032	-0.118783	0.0125759	0.948282	0.888001	1.01266
ieu-b-85.vcf	ebi-a-GCST90001641	CD3- lymphocyte %leukocyte	id:ebi-a-GCST90001641	92	-0.0993045	0.0678155	0.146587	-0.232223	0.0336139	0.905467	0.792769	1.03419
ieu-b-85.vcf	ebi-a-GCST90001641	CD3- lymphocyte %leukocyte	id:ebi-a-GCST90001641	92	-0.0786596	0.0506838	0.12067	-0.178	0.0206807	0.924355	0.836943	1.0209
ieu-b-85.vcf	ebi-a-GCST90001641	CD3- lymphocyte %leukocyte	id:ebi-a-GCST90001641	92	-0.0805742	0.058283	0.170212	-0.194809	0.0336605	0.922586	0.822992	1.03423
ieu-b-85.vcf	ebi-a-GCST90002077	SSC-A on HLA DR+ Natural Killer	id:ebi-a-GCST90002077	93	-0.000955814	0.0354609	0.978496	-0.0704591	0.0685475	0.999045	0.931966	1.07095
ieu-b-85.vcf	ebi-a-GCST90002077	SSC-A on HLA DR+ Natural Killer	id:ebi-a-GCST90002077	93	-0.00218591	0.0699426	0.975136	-0.139273	0.134902	0.997816	0.86999	1.14442
ieu-b-85.vcf	ebi-a-GCST90002077	SSC-A on HLA DR+ Natural Killer	id:ebi-a-GCST90002077	93	-0.0210182	0.0508069	0.679102	-0.1206	0.0785634	0.979201	0.886389	1.08173
ieu-b-85.vcf	ebi-a-GCST90002077	SSC-A on HLA DR+ Natural Killer	id:ebi-a-GCST90002077	93	-0.0278585	0.0665161	0.676321	-0.15823	0.102513	0.972526	0.853653	1.10795
ieu-b-85.vcf	ebi-a-GCST90001937	CD25 on resting CD4 regulatory T cell	id:ebi-a-GCST90001937	90	0.0106686	0.033477	0.749966	-0.0549463	0.0762835	1.01073	0.946536	1.07927
ieu-b-85.vcf	ebi-a-GCST90001937	CD25 on resting CD4 regulatory T cell	id:ebi-a-GCST90001937	90	0.0718451	0.0667243	0.284537	-0.0589345	0.202625	1.07449	0.942769	1.22461
ieu-b-85.vcf	ebi-a-GCST90001937	CD25 on resting CD4 regulatory T cell	id:ebi-a-GCST90001937	90	0.0390091	0.0488421	0.424477	-0.0567214	0.134739	1.03978	0.944857	1.14424
ieu-b-85.vcf	ebi-a-GCST90001937	CD25 on resting CD4 regulatory T cell	id:ebi-a-GCST90001937	90	0.0919338	0.064357	0.156649	-0.034206	0.218074	1.09629	0.966372	1.24368
ieu-b-85.vcf	ebi-a-GCST90002039	CD80 on monocyte	id:ebi-a-GCST90002039	90	-0.00106284	0.0354252	0.976065	-0.0704962	0.0683705	0.998938	0.931931	1.07076
ieu-b-85.vcf	ebi-a-GCST90002039	CD80 on monocyte	id:ebi-a-GCST90002039	90	-0.0130199	0.0727316	0.858339	-0.155574	0.129534	0.987065	0.855924	1.1383
ieu-b-85.vcf	ebi-a-GCST90002039	CD80 on monocyte	id:ebi-a-GCST90002039	90	0.0288087	0.0505978	0.569107	-0.070363	0.12798	1.02923	0.932055	1.13653
ieu-b-85.vcf	ebi-a-GCST90002039	CD80 on monocyte	id:ebi-a-GCST90002039	90	0.108766	0.0801261	0.178077	-0.0482816	0.265813	1.1149	0.952865	1.30449
ieu-b-85.vcf	ebi-a-GCST90001941	CD25 on secreting CD4 regulatory T cell	id:ebi-a-GCST90001941	89	0.0199945	0.0339884	0.556349	-0.0466228	0.0866117	1.0202	0.954447	1.09047
ieu-b-85.vcf	ebi-a-GCST90001941	CD25 on secreting CD4 regulatory T cell	id:ebi-a-GCST90001941	89	0.0258304	0.0684944	0.707005	-0.108419	0.160079	1.02617	0.897252	1.1736
ieu-b-85.vcf	ebi-a-GCST90001941	CD25 on secreting CD4 regulatory T cell	id:ebi-a-GCST90001941	89	0.0222264	0.0474585	0.639546	-0.0707922	0.115245	1.02248	0.931655	1.12215
ieu-b-85.vcf	ebi-a-GCST90001941	CD25 on secreting CD4 regulatory T cell	id:ebi-a-GCST90001941	89	0.0205117	0.0575597	0.722427	-0.0923052	0.133329	1.02072	0.911827	1.14263
ieu-b-85.vcf	ebi-a-GCST90001562	CD45RA+ CD8+ T cell %T cell	id:ebi-a-GCST90001562	101	0.0194459	0.0287938	0.499454	-0.03699	0.0758818	1.01964	0.963686	1.07884
ieu-b-85.vcf	ebi-a-GCST90001562	CD45RA+ CD8+ T cell %T cell	id:ebi-a-GCST90001562	101	0.061808	0.0581899	0.29074	-0.0522443	0.17586	1.06376	0.949097	1.19227
ieu-b-85.vcf	ebi-a-GCST90001562	CD45RA+ CD8+ T cell %T cell	id:ebi-a-GCST90001562	101	0.0593469	0.0440208	0.177608	-0.0269338	0.145628	1.06114	0.973426	1.15677
ieu-b-85.vcf	ebi-a-GCST90001562	CD45RA+ CD8+ T cell %T cell	id:ebi-a-GCST90001562	101	0.121516	0.0638077	0.0597315	-0.0035474	0.246579	1.12921	0.996459	1.27964
ieu-b-85.vcf	ebi-a-GCST90001845	CD3 on CD45RA- CD4+ T cell	id:ebi-a-GCST90001845	87	0.0555235	0.0367311	0.13063	-0.0164694	0.127516	1.05709	0.983665	1.136
ieu-b-85.vcf	ebi-a-GCST90001845	CD3 on CD45RA- CD4+ T cell	id:ebi-a-GCST90001845	87	0.0766096	0.0718318	0.289211	-0.0641807	0.2174	1.07962	0.937836	1.24284
ieu-b-85.vcf	ebi-a-GCST90001845	CD3 on CD45RA- CD4+ T cell	id:ebi-a-GCST90001845	87	0.0715725	0.054113	0.185952	-0.034489	0.177634	1.0742	0.966099	1.19439
ieu-b-85.vcf	ebi-a-GCST90001845	CD3 on CD45RA- CD4+ T cell	id:ebi-a-GCST90001845	87	0.0657083	0.0680028	0.336624	-0.0675772	0.198994	1.06792	0.934656	1.22017
ieu-b-85.vcf	ebi-a-GCST90001910	CD45 on B cell	id:ebi-a-GCST90001910	89	0.00732766	0.0339526	0.829128	-0.0592194	0.0738748	1.00735	0.9425	1.07667
ieu-b-85.vcf	ebi-a-GCST90001910	CD45 on B cell	id:ebi-a-GCST90001910	89	0.101793	0.0683543	0.140051	-0.0321812	0.235768	1.10715	0.968331	1.26588
ieu-b-85.vcf	ebi-a-GCST90001910	CD45 on B cell	id:ebi-a-GCST90001910	89	0.0169005	0.0505313	0.738035	-0.0821409	0.115942	1.01704	0.921142	1.12293
ieu-b-85.vcf	ebi-a-GCST90001910	CD45 on B cell	id:ebi-a-GCST90001910	89	-0.00889478	0.0789526	0.910557	-0.163642	0.145852	0.991145	0.849046	1.15703
ieu-b-85.vcf	ebi-a-GCST90001830	BAFF-R on CD20- B cell	id:ebi-a-GCST90001830	95	-0.021354	0.0321198	0.506163	-0.0843089	0.0416008	0.978872	0.919147	1.04248
ieu-b-85.vcf	ebi-a-GCST90001830	BAFF-R on CD20- B cell	id:ebi-a-GCST90001830	95	-0.0494817	0.0652285	0.450016	-0.17733	0.0783661	0.951723	0.837504	1.08152
ieu-b-85.vcf	ebi-a-GCST90001830	BAFF-R on CD20- B cell	id:ebi-a-GCST90001830	95	-0.0210684	0.0491208	0.667989	-0.117345	0.0752083	0.979152	0.889278	1.07811
ieu-b-85.vcf	ebi-a-GCST90001830	BAFF-R on CD20- B cell	id:ebi-a-GCST90001830	95	-0.00720755	0.0706847	0.919	-0.14575	0.131335	0.992818	0.864374	1.14035
ieu-b-85.vcf	ebi-a-GCST90001774	CD24 on transitional B cell	id:ebi-a-GCST90001774	88	-0.00464592	0.03255	0.886502	-0.068444	0.0591522	0.995365	0.933846	1.06094
ieu-b-85.vcf	ebi-a-GCST90001774	CD24 on transitional B cell	id:ebi-a-GCST90001774	88	-0.0330218	0.0650055	0.612764	-0.160433	0.094389	0.967517	0.851775	1.09899
ieu-b-85.vcf	ebi-a-GCST90001774	CD24 on transitional B cell	id:ebi-a-GCST90001774	88	0.0233786	0.0498113	0.638824	-0.0742515	0.121009	1.02365	0.928438	1.12863
ieu-b-85.vcf	ebi-a-GCST90001774	CD24 on transitional B cell	id:ebi-a-GCST90001774	88	0.0381358	0.0760599	0.617361	-0.110942	0.187213	1.03887	0.894991	1.20588
ieu-b-85.vcf	ebi-a-GCST90001452	CD11c+ CD62L- monocyte Absolute Count	id:ebi-a-GCST90001452	93	-0.0641798	0.0343093	0.0613973	-0.131426	0.00306645	0.937836	0.876844	1.00307
ieu-b-85.vcf	ebi-a-GCST90001452	CD11c+ CD62L- monocyte Absolute Count	id:ebi-a-GCST90001452	93	-0.114806	0.0692372	0.100731	-0.25051	0.0208993	0.891539	0.778403	1.02112
ieu-b-85.vcf	ebi-a-GCST90001452	CD11c+ CD62L- monocyte Absolute Count	id:ebi-a-GCST90001452	93	-0.0795731	0.0511756	0.119969	-0.179877	0.020731	0.92351	0.835373	1.02095
ieu-b-85.vcf	ebi-a-GCST90001452	CD11c+ CD62L- monocyte Absolute Count	id:ebi-a-GCST90001452	93	-0.119022	0.0707269	0.0957971	-0.257647	0.0196027	0.887788	0.772868	1.0198
ieu-b-85.vcf	ebi-a-GCST90001410	IgD- CD38+ B cell %B cell	id:ebi-a-GCST90001410	89	0.00860254	0.0321955	0.789318	-0.0545006	0.0717057	1.00864	0.946958	1.07434
ieu-b-85.vcf	ebi-a-GCST90001410	IgD- CD38+ B cell %B cell	id:ebi-a-GCST90001410	89	0.00629348	0.0656704	0.923872	-0.12242	0.135007	1.00631	0.884776	1.14455
ieu-b-85.vcf	ebi-a-GCST90001410	IgD- CD38+ B cell %B cell	id:ebi-a-GCST90001410	89	-0.0124748	0.050532	0.805009	-0.111517	0.0865679	0.987603	0.894476	1.09043
ieu-b-85.vcf	ebi-a-GCST90001410	IgD- CD38+ B cell %B cell	id:ebi-a-GCST90001410	89	-0.0835531	0.0774581	0.283674	-0.235371	0.0682647	0.919842	0.790278	1.07065
ieu-b-85.vcf	ebi-a-GCST90002111	HLA DR on CD33dim HLA DR+ CD11b-	id:ebi-a-GCST90002111	68	0.0147857	0.0506297	0.770259	-0.0844486	0.11402	1.0149	0.919019	1.12077
ieu-b-85.vcf	ebi-a-GCST90002111	HLA DR on CD33dim HLA DR+ CD11b-	id:ebi-a-GCST90002111	68	-0.044115	0.0976227	0.652828	-0.235455	0.147225	0.956844	0.790211	1.15862
ieu-b-85.vcf	ebi-a-GCST90002111	HLA DR on CD33dim HLA DR+ CD11b-	id:ebi-a-GCST90002111	68	-0.0120934	0.0736761	0.869619	-0.156498	0.132312	0.987979	0.855133	1.14146
ieu-b-85.vcf	ebi-a-GCST90002111	HLA DR on CD33dim HLA DR+ CD11b-	id:ebi-a-GCST90002111	68	-0.0462988	0.0961877	0.631845	-0.234827	0.142229	0.954757	0.790708	1.15284
ieu-b-85.vcf	ebi-a-GCST90001416	IgD+ CD24- B cell Absolute Count	id:ebi-a-GCST90001416	88	-0.0412103	0.0327545	0.208335	-0.105409	0.0229885	0.959627	0.899956	1.02325
ieu-b-85.vcf	ebi-a-GCST90001416	IgD+ CD24- B cell Absolute Count	id:ebi-a-GCST90001416	88	-0.054209	0.0669737	0.420515	-0.185477	0.0770594	0.947234	0.830708	1.08011
ieu-b-85.vcf	ebi-a-GCST90001416	IgD+ CD24- B cell Absolute Count	id:ebi-a-GCST90001416	88	-0.0763215	0.0509323	0.134006	-0.176149	0.0235058	0.926518	0.838493	1.02378
ieu-b-85.vcf	ebi-a-GCST90001416	IgD+ CD24- B cell Absolute Count	id:ebi-a-GCST90001416	88	-0.0942562	0.0749497	0.211904	-0.241158	0.0526451	0.91005	0.785718	1.05406
ieu-b-85.vcf	ebi-a-GCST90001760	CD20 on unswitched memory B cell	id:ebi-a-GCST90001760	93	0.00622139	0.0319227	0.84548	-0.0563472	0.06879	1.00624	0.945211	1.07121
ieu-b-85.vcf	ebi-a-GCST90001760	CD20 on unswitched memory B cell	id:ebi-a-GCST90001760	93	-0.0256471	0.064976	0.693975	-0.153	0.101706	0.974679	0.85813	1.10706
ieu-b-85.vcf	ebi-a-GCST90001760	CD20 on unswitched memory B cell	id:ebi-a-GCST90001760	93	-0.0145182	0.049217	0.768007	-0.110984	0.0819472	0.985587	0.894953	1.0854
ieu-b-85.vcf	ebi-a-GCST90001760	CD20 on unswitched memory B cell	id:ebi-a-GCST90001760	93	-0.0256273	0.0721526	0.723266	-0.167046	0.115792	0.974698	0.84616	1.12276
ieu-b-85.vcf	ebi-a-GCST90001810	CD38 on CD3- CD19-	id:ebi-a-GCST90001810	78	-0.0143142	0.0466822	0.759124	-0.105811	0.0771828	0.985788	0.899594	1.08024
ieu-b-85.vcf	ebi-a-GCST90001810	CD38 on CD3- CD19-	id:ebi-a-GCST90001810	78	0.0188824	0.0967035	0.84571	-0.170657	0.208421	1.01906	0.843111	1.23173
ieu-b-85.vcf	ebi-a-GCST90001810	CD38 on CD3- CD19-	id:ebi-a-GCST90001810	78	0.0079579	0.0689666	0.908138	-0.127217	0.143133	1.00799	0.880543	1.15388
ieu-b-85.vcf	ebi-a-GCST90001810	CD38 on CD3- CD19-	id:ebi-a-GCST90001810	78	0.01663	0.0917777	0.856688	-0.163254	0.196514	1.01677	0.849375	1.21715
ieu-b-85.vcf	ebi-a-GCST90001499	Activated & resting CD4 regulatory T cell %CD4 regulatory T cell	id:ebi-a-GCST90001499	89	-0.00484937	0.0316288	0.878145	-0.0668419	0.0571431	0.995162	0.935343	1.05881
ieu-b-85.vcf	ebi-a-GCST90001499	Activated & resting CD4 regulatory T cell %CD4 regulatory T cell	id:ebi-a-GCST90001499	89	-0.0121208	0.0630545	0.848012	-0.135708	0.111466	0.987952	0.873098	1.11792
ieu-b-85.vcf	ebi-a-GCST90001499	Activated & resting CD4 regulatory T cell %CD4 regulatory T cell	id:ebi-a-GCST90001499	89	0.00152953	0.0495839	0.975391	-0.095655	0.098714	1.00153	0.908778	1.10375
ieu-b-85.vcf	ebi-a-GCST90001499	Activated & resting CD4 regulatory T cell %CD4 regulatory T cell	id:ebi-a-GCST90001499	89	0.0465645	0.0768134	0.54594	-0.10399	0.197119	1.04767	0.901235	1.21789
ieu-b-85.vcf	ebi-a-GCST90002034	CD39 on monocyte	id:ebi-a-GCST90002034	78	-0.00419596	0.037681	0.911335	-0.0780508	0.0696589	0.995813	0.924917	1.07214
ieu-b-85.vcf	ebi-a-GCST90002034	CD39 on monocyte	id:ebi-a-GCST90002034	78	0.0130804	0.0772099	0.865921	-0.138251	0.164412	1.01317	0.87088	1.1787
ieu-b-85.vcf	ebi-a-GCST90002034	CD39 on monocyte	id:ebi-a-GCST90002034	78	0.00326503	0.0584435	0.955448	-0.111284	0.117814	1.00327	0.894684	1.12504
ieu-b-85.vcf	ebi-a-GCST90002034	CD39 on monocyte	id:ebi-a-GCST90002034	78	0.015277	0.0867571	0.860686	-0.154767	0.185321	1.01539	0.856615	1.2036
ieu-b-85.vcf	ebi-a-GCST90001820	IgD on IgD+ CD24+ B cell	id:ebi-a-GCST90001820	91	-0.0463772	0.0328818	0.158415	-0.110826	0.0180712	0.954682	0.895095	1.01824
ieu-b-85.vcf	ebi-a-GCST90001820	IgD on IgD+ CD24+ B cell	id:ebi-a-GCST90001820	91	0.0118564	0.0653028	0.856341	-0.116137	0.13985	1.01193	0.890353	1.1501
ieu-b-85.vcf	ebi-a-GCST90001820	IgD on IgD+ CD24+ B cell	id:ebi-a-GCST90001820	91	-0.0452931	0.0484381	0.349751	-0.140232	0.0496456	0.955717	0.869157	1.0509
ieu-b-85.vcf	ebi-a-GCST90001820	IgD on IgD+ CD24+ B cell	id:ebi-a-GCST90001820	91	0.0642868	0.0891109	0.472518	-0.110371	0.238944	1.0664	0.895502	1.26991
ieu-b-85.vcf	ebi-a-GCST90001441	IgD+ CD24- B cell %lymphocyte	id:ebi-a-GCST90001441	91	-0.028494	0.0322592	0.377083	-0.091722	0.034734	0.971908	0.912359	1.03534
ieu-b-85.vcf	ebi-a-GCST90001441	IgD+ CD24- B cell %lymphocyte	id:ebi-a-GCST90001441	91	-0.0713343	0.0651166	0.276259	-0.198963	0.0562942	0.931151	0.81958	1.05791
ieu-b-85.vcf	ebi-a-GCST90001441	IgD+ CD24- B cell %lymphocyte	id:ebi-a-GCST90001441	91	-0.0702936	0.0501586	0.161087	-0.168605	0.0280173	0.93212	0.844843	1.02841
ieu-b-85.vcf	ebi-a-GCST90001441	IgD+ CD24- B cell %lymphocyte	id:ebi-a-GCST90001441	91	-0.114107	0.0785279	0.149679	-0.268022	0.0398073	0.892162	0.764891	1.04061
ieu-b-85.vcf	ebi-a-GCST90001808	CD27 on switched memory B cell	id:ebi-a-GCST90001808	93	0.017012	0.0324749	0.600381	-0.0466387	0.0806628	1.01716	0.954432	1.08401
ieu-b-85.vcf	ebi-a-GCST90001808	CD27 on switched memory B cell	id:ebi-a-GCST90001808	93	-0.0248308	0.0646434	0.701786	-0.151532	0.10187	0.975475	0.859391	1.10724
ieu-b-85.vcf	ebi-a-GCST90001808	CD27 on switched memory B cell	id:ebi-a-GCST90001808	93	-0.00619237	0.0521077	0.905404	-0.108323	0.0959387	0.993827	0.897337	1.10069
ieu-b-85.vcf	ebi-a-GCST90001808	CD27 on switched memory B cell	id:ebi-a-GCST90001808	93	-0.126871	0.0851331	0.139576	-0.293732	0.0399904	0.880848	0.745477	1.0408
ieu-b-85.vcf	ebi-a-GCST90001951	CD33 on CD66b++ myeloid cell	id:ebi-a-GCST90001951	69	0.0307446	0.0546211	0.573523	-0.0763128	0.137802	1.03122	0.926526	1.14775
ieu-b-85.vcf	ebi-a-GCST90001951	CD33 on CD66b++ myeloid cell	id:ebi-a-GCST90001951	69	0.0109347	0.110267	0.921303	-0.205188	0.227057	1.01099	0.814494	1.2549
ieu-b-85.vcf	ebi-a-GCST90001951	CD33 on CD66b++ myeloid cell	id:ebi-a-GCST90001951	69	0.0109258	0.0755431	0.885003	-0.137139	0.15899	1.01099	0.871849	1.17233
ieu-b-85.vcf	ebi-a-GCST90001951	CD33 on CD66b++ myeloid cell	id:ebi-a-GCST90001951	69	-0.0424725	0.104445	0.685541	-0.247184	0.162239	0.958417	0.780997	1.17614
ieu-b-85.vcf	ebi-a-GCST90001654	CD28- CD4-CD8- T cell Absolute Count	id:ebi-a-GCST90001654	91	-0.0556166	0.0330165	0.0920836	-0.120329	0.0090958	0.945902	0.886629	1.00914
ieu-b-85.vcf	ebi-a-GCST90001654	CD28- CD4-CD8- T cell Absolute Count	id:ebi-a-GCST90001654	91	-0.131256	0.0680301	0.0568693	-0.264595	0.00208295	0.876993	0.767517	1.00209
ieu-b-85.vcf	ebi-a-GCST90001654	CD28- CD4-CD8- T cell Absolute Count	id:ebi-a-GCST90001654	91	-0.0834	0.0474791	0.0789923	-0.176459	0.00965898	0.919983	0.838233	1.00971
ieu-b-85.vcf	ebi-a-GCST90001654	CD28- CD4-CD8- T cell Absolute Count	id:ebi-a-GCST90001654	91	-0.0817853	0.0683011	0.234286	-0.215655	0.0520849	0.92147	0.806013	1.05347
ieu-b-85.vcf	ebi-a-GCST90002082	SSC-A on CD8+ T cell	id:ebi-a-GCST90002082	101	-0.0355059	0.0309161	0.250779	-0.0961015	0.0250897	0.965117	0.908372	1.02541
ieu-b-85.vcf	ebi-a-GCST90002082	SSC-A on CD8+ T cell	id:ebi-a-GCST90002082	101	-0.0641241	0.0630944	0.311955	-0.187789	0.059541	0.937889	0.828789	1.06135
ieu-b-85.vcf	ebi-a-GCST90002082	SSC-A on CD8+ T cell	id:ebi-a-GCST90002082	101	-0.0710941	0.0456722	0.119562	-0.160612	0.0184235	0.931374	0.851623	1.01859
ieu-b-85.vcf	ebi-a-GCST90002082	SSC-A on CD8+ T cell	id:ebi-a-GCST90002082	101	-0.0821781	0.0660176	0.216118	-0.211573	0.0472164	0.921108	0.80931	1.04835
ieu-b-85.vcf	ebi-a-GCST90001764	CD24 on CD24+ CD27+ B cell	id:ebi-a-GCST90001764	22	0.0551779	0.0709002	0.436424	-0.0837866	0.194142	1.05673	0.919627	1.21427
ieu-b-85.vcf	ebi-a-GCST90001764	CD24 on CD24+ CD27+ B cell	id:ebi-a-GCST90001764	22	0.0561369	0.166689	0.739793	-0.270573	0.382847	1.05774	0.762942	1.46645
ieu-b-85.vcf	ebi-a-GCST90001764	CD24 on CD24+ CD27+ B cell	id:ebi-a-GCST90001764	22	0.0726164	0.0974947	0.456378	-0.118473	0.263706	1.07532	0.888276	1.30175
ieu-b-85.vcf	ebi-a-GCST90001764	CD24 on CD24+ CD27+ B cell	id:ebi-a-GCST90001764	22	0.116882	0.133236	0.390273	-0.144261	0.378026	1.12399	0.865662	1.4594
ieu-b-85.vcf	ebi-a-GCST90002074	SSC-A on CD14+ monocyte	id:ebi-a-GCST90002074	88	0.00338899	0.0350931	0.923067	-0.0653935	0.0721715	1.00339	0.936699	1.07484
ieu-b-85.vcf	ebi-a-GCST90002074	SSC-A on CD14+ monocyte	id:ebi-a-GCST90002074	88	-0.000230798	0.0713798	0.997428	-0.140135	0.139674	0.999769	0.869241	1.1499
ieu-b-85.vcf	ebi-a-GCST90002074	SSC-A on CD14+ monocyte	id:ebi-a-GCST90002074	88	0.0228622	0.0533177	0.668075	-0.0816405	0.127365	1.02313	0.921603	1.13583
ieu-b-85.vcf	ebi-a-GCST90002074	SSC-A on CD14+ monocyte	id:ebi-a-GCST90002074	88	0.0603092	0.078814	0.446218	-0.0941663	0.214785	1.06216	0.910131	1.2396
ieu-b-85.vcf	ebi-a-GCST90001537	Central Memory CD4+ T cell Absolute Count	id:ebi-a-GCST90001537	95	0.00417855	0.0332327	0.899941	-0.0609575	0.0693146	1.00419	0.940863	1.07177
ieu-b-85.vcf	ebi-a-GCST90001537	Central Memory CD4+ T cell Absolute Count	id:ebi-a-GCST90001537	95	-0.0577965	0.0670524	0.390926	-0.189219	0.0736261	0.943842	0.827605	1.0764
ieu-b-85.vcf	ebi-a-GCST90001537	Central Memory CD4+ T cell Absolute Count	id:ebi-a-GCST90001537	95	0.0404755	0.0510507	0.427866	-0.0595839	0.140535	1.04131	0.942156	1.15089
ieu-b-85.vcf	ebi-a-GCST90001537	Central Memory CD4+ T cell Absolute Count	id:ebi-a-GCST90001537	95	0.0401212	0.0749574	0.593739	-0.106795	0.187038	1.04094	0.89871	1.20567
ieu-b-85.vcf	ebi-a-GCST90001815	CD38 on IgD- CD38dim B cell	id:ebi-a-GCST90001815	92	0.00760837	0.0319236	0.811625	-0.054962	0.0701787	1.00764	0.946521	1.0727
ieu-b-85.vcf	ebi-a-GCST90001815	CD38 on IgD- CD38dim B cell	id:ebi-a-GCST90001815	92	-0.0120132	0.0634297	0.850211	-0.136335	0.112309	0.988059	0.87255	1.11886
ieu-b-85.vcf	ebi-a-GCST90001815	CD38 on IgD- CD38dim B cell	id:ebi-a-GCST90001815	92	0.064417	0.0485703	0.184752	-0.0307808	0.159615	1.06654	0.969688	1.17306
ieu-b-85.vcf	ebi-a-GCST90001815	CD38 on IgD- CD38dim B cell	id:ebi-a-GCST90001815	92	0.0955424	0.0697973	0.174415	-0.0412604	0.232345	1.10026	0.959579	1.26156
ieu-b-85.vcf	ebi-a-GCST90001680	CD25++ CD8+ T cell %CD8+ T cell	id:ebi-a-GCST90001680	92	-0.00923281	0.0343866	0.788314	-0.0766306	0.0581649	0.99081	0.926232	1.05989
ieu-b-85.vcf	ebi-a-GCST90001680	CD25++ CD8+ T cell %CD8+ T cell	id:ebi-a-GCST90001680	92	-0.0502855	0.0680619	0.461939	-0.183687	0.0831159	0.950958	0.832196	1.08667
ieu-b-85.vcf	ebi-a-GCST90001680	CD25++ CD8+ T cell %CD8+ T cell	id:ebi-a-GCST90001680	92	-0.0123435	0.0537405	0.818335	-0.117675	0.092988	0.987732	0.888985	1.09745
ieu-b-85.vcf	ebi-a-GCST90001680	CD25++ CD8+ T cell %CD8+ T cell	id:ebi-a-GCST90001680	92	-0.105108	0.0871176	0.23075	-0.275859	0.0656426	0.900227	0.75892	1.06785
ieu-b-85.vcf	ebi-a-GCST90001486	Activated CD4 regulatory T cell Absolute Count	id:ebi-a-GCST90001486	92	0.0148781	0.0338065	0.659868	-0.0513827	0.0811389	1.01499	0.949915	1.08452
ieu-b-85.vcf	ebi-a-GCST90001486	Activated CD4 regulatory T cell Absolute Count	id:ebi-a-GCST90001486	92	0.0564262	0.0673548	0.404393	-0.0755891	0.188441	1.05805	0.927197	1.20737
ieu-b-85.vcf	ebi-a-GCST90001486	Activated CD4 regulatory T cell Absolute Count	id:ebi-a-GCST90001486	92	0.0263552	0.0540497	0.625826	-0.0795822	0.132293	1.02671	0.923502	1.14144
ieu-b-85.vcf	ebi-a-GCST90001486	Activated CD4 regulatory T cell Absolute Count	id:ebi-a-GCST90001486	92	0.0170034	0.07741	0.826633	-0.13472	0.168727	1.01715	0.87396	1.1838
ieu-b-85.vcf	ebi-a-GCST90001629	HLA DR+ CD8+ T cell %lymphocyte	id:ebi-a-GCST90001629	99	-0.0142351	0.0311572	0.647757	-0.0753033	0.046833	0.985866	0.927462	1.04795
ieu-b-85.vcf	ebi-a-GCST90001629	HLA DR+ CD8+ T cell %lymphocyte	id:ebi-a-GCST90001629	99	-0.069622	0.0627589	0.270019	-0.19263	0.0533855	0.932746	0.824787	1.05484
ieu-b-85.vcf	ebi-a-GCST90001629	HLA DR+ CD8+ T cell %lymphocyte	id:ebi-a-GCST90001629	99	-0.0478147	0.0504299	0.343057	-0.146657	0.0510279	0.95331	0.86359	1.05235
ieu-b-85.vcf	ebi-a-GCST90001629	HLA DR+ CD8+ T cell %lymphocyte	id:ebi-a-GCST90001629	99	-0.137669	0.0736506	0.0645783	-0.282024	0.00668603	0.871387	0.754255	1.00671
ieu-b-85.vcf	ebi-a-GCST90002032	CD39 on CD39+ CD4+ T cell	id:ebi-a-GCST90002032	88	-0.0133538	0.0366639	0.715692	-0.0852151	0.0585075	0.986735	0.918315	1.06025
ieu-b-85.vcf	ebi-a-GCST90002032	CD39 on CD39+ CD4+ T cell	id:ebi-a-GCST90002032	88	-0.0305883	0.0746524	0.683014	-0.176907	0.11573	0.969875	0.837858	1.12269
ieu-b-85.vcf	ebi-a-GCST90002032	CD39 on CD39+ CD4+ T cell	id:ebi-a-GCST90002032	88	-0.0569076	0.0551069	0.301755	-0.164917	0.0511018	0.944681	0.847964	1.05243
ieu-b-85.vcf	ebi-a-GCST90002032	CD39 on CD39+ CD4+ T cell	id:ebi-a-GCST90002032	88	-0.0643384	0.0741616	0.388031	-0.209695	0.0810184	0.937688	0.810831	1.08439
ieu-b-85.vcf	ebi-a-GCST90001786	CD25 on IgD- CD27- B cell	id:ebi-a-GCST90001786	92	-0.00671587	0.0321936	0.834753	-0.0698152	0.0563835	0.993307	0.932566	1.058
ieu-b-85.vcf	ebi-a-GCST90001786	CD25 on IgD- CD27- B cell	id:ebi-a-GCST90001786	92	0.00217945	0.0649741	0.973316	-0.12517	0.129529	1.00218	0.882347	1.13829
ieu-b-85.vcf	ebi-a-GCST90001786	CD25 on IgD- CD27- B cell	id:ebi-a-GCST90001786	92	0.0292472	0.049479	0.554451	-0.0677315	0.126226	1.02968	0.934511	1.13454
ieu-b-85.vcf	ebi-a-GCST90001786	CD25 on IgD- CD27- B cell	id:ebi-a-GCST90001786	92	0.0829813	0.0731334	0.259499	-0.0603601	0.226323	1.08652	0.941425	1.25398
ieu-b-85.vcf	ebi-a-GCST90001493	Secreting CD4 regulatory T cell %CD4 regulatory T cell	id:ebi-a-GCST90001493	88	0.00609263	0.0315276	0.846765	-0.0557014	0.0678867	1.00611	0.945822	1.07024
ieu-b-85.vcf	ebi-a-GCST90001493	Secreting CD4 regulatory T cell %CD4 regulatory T cell	id:ebi-a-GCST90001493	88	0.018974	0.0628556	0.763483	-0.104223	0.142171	1.01916	0.901024	1.15277
ieu-b-85.vcf	ebi-a-GCST90001493	Secreting CD4 regulatory T cell %CD4 regulatory T cell	id:ebi-a-GCST90001493	88	0.00453973	0.0498866	0.927492	-0.0932379	0.102317	1.00455	0.910977	1.10774
ieu-b-85.vcf	ebi-a-GCST90001493	Secreting CD4 regulatory T cell %CD4 regulatory T cell	id:ebi-a-GCST90001493	88	-0.0189361	0.0763015	0.804584	-0.168487	0.130615	0.981242	0.844942	1.13953
ieu-b-85.vcf	ebi-a-GCST90001790	CD25 on memory B cell	id:ebi-a-GCST90001790	91	-0.0189452	0.0319186	0.552815	-0.0815057	0.0436153	0.981233	0.921727	1.04458
ieu-b-85.vcf	ebi-a-GCST90001790	CD25 on memory B cell	id:ebi-a-GCST90001790	91	-0.0303953	0.0651093	0.641759	-0.15801	0.097219	0.970062	0.853842	1.1021
ieu-b-85.vcf	ebi-a-GCST90001790	CD25 on memory B cell	id:ebi-a-GCST90001790	91	0.00601613	0.048796	0.901876	-0.089624	0.101656	1.00603	0.914275	1.107
ieu-b-85.vcf	ebi-a-GCST90001790	CD25 on memory B cell	id:ebi-a-GCST90001790	91	0.00308236	0.0685563	0.964238	-0.131288	0.137453	1.00309	0.876965	1.14735
ieu-b-85.vcf	ebi-a-GCST90001838	CD3 on naive CD8+ T cell	id:ebi-a-GCST90001838	88	0.00517328	0.0364476	0.88713	-0.0662641	0.0766106	1.00519	0.935884	1.07962
ieu-b-85.vcf	ebi-a-GCST90001838	CD3 on naive CD8+ T cell	id:ebi-a-GCST90001838	88	0.0293497	0.0734366	0.690397	-0.114586	0.173285	1.02978	0.891735	1.18921
ieu-b-85.vcf	ebi-a-GCST90001838	CD3 on naive CD8+ T cell	id:ebi-a-GCST90001838	88	0.0141268	0.0535222	0.791824	-0.0907767	0.11903	1.01423	0.913222	1.1264
ieu-b-85.vcf	ebi-a-GCST90001838	CD3 on naive CD8+ T cell	id:ebi-a-GCST90001838	88	0.0304835	0.0693813	0.661488	-0.105504	0.166471	1.03095	0.899871	1.18113
ieu-b-85.vcf	ebi-a-GCST90002051	CD45 on basophil	id:ebi-a-GCST90002051	62	-0.0509825	0.055433	0.357722	-0.159631	0.0576662	0.950295	0.852458	1.05936
ieu-b-85.vcf	ebi-a-GCST90002051	CD45 on basophil	id:ebi-a-GCST90002051	62	-0.0933924	0.104152	0.373467	-0.29753	0.110746	0.910836	0.74265	1.11711
ieu-b-85.vcf	ebi-a-GCST90002051	CD45 on basophil	id:ebi-a-GCST90002051	62	-0.0725192	0.08463	0.391502	-0.238394	0.0933556	0.930048	0.787892	1.09785
ieu-b-85.vcf	ebi-a-GCST90002051	CD45 on basophil	id:ebi-a-GCST90002051	62	-0.0823602	0.12114	0.499154	-0.319794	0.155074	0.92094	0.726299	1.16774
ieu-b-85.vcf	ebi-a-GCST90001638	CD4-CD8- Natural Killer T %lymphocyte	id:ebi-a-GCST90001638	92	-0.0407723	0.0320993	0.204015	-0.103687	0.0221423	0.960048	0.901507	1.02239
ieu-b-85.vcf	ebi-a-GCST90001638	CD4-CD8- Natural Killer T %lymphocyte	id:ebi-a-GCST90001638	92	-0.0771938	0.0646562	0.23565	-0.20392	0.0495324	0.92571	0.815528	1.05078
ieu-b-85.vcf	ebi-a-GCST90001638	CD4-CD8- Natural Killer T %lymphocyte	id:ebi-a-GCST90001638	92	-0.0955729	0.0498955	0.0554337	-0.193368	0.00222228	0.908852	0.824179	1.00222
ieu-b-85.vcf	ebi-a-GCST90001638	CD4-CD8- Natural Killer T %lymphocyte	id:ebi-a-GCST90001638	92	-0.130921	0.0691837	0.0616216	-0.266521	0.00467932	0.877287	0.76604	1.00469
ieu-b-85.vcf	ebi-a-GCST90002014	CCR2 on CD62L+ myeloid Dendritic Cell	id:ebi-a-GCST90002014	90	-0.0227768	0.0367966	0.535922	-0.0948982	0.0493446	0.977481	0.909466	1.05058
ieu-b-85.vcf	ebi-a-GCST90002014	CCR2 on CD62L+ myeloid Dendritic Cell	id:ebi-a-GCST90002014	90	-0.0691315	0.0738293	0.351645	-0.213837	0.0755738	0.933204	0.80748	1.0785
ieu-b-85.vcf	ebi-a-GCST90002014	CCR2 on CD62L+ myeloid Dendritic Cell	id:ebi-a-GCST90002014	90	-0.0395351	0.0560573	0.480647	-0.149407	0.0703373	0.961236	0.861218	1.07287
ieu-b-85.vcf	ebi-a-GCST90002014	CCR2 on CD62L+ myeloid Dendritic Cell	id:ebi-a-GCST90002014	90	-0.0277476	0.0858399	0.747266	-0.195994	0.140499	0.972634	0.822017	1.15085
ieu-b-85.vcf	ebi-a-GCST90001575	Naive CD4+ T cell %T cell	id:ebi-a-GCST90001575	90	-0.000383833	0.0318797	0.990394	-0.0628681	0.0621004	0.999616	0.939067	1.06407
ieu-b-85.vcf	ebi-a-GCST90001575	Naive CD4+ T cell %T cell	id:ebi-a-GCST90001575	90	0.0397692	0.0632584	0.531188	-0.0842172	0.163756	1.04057	0.919232	1.17793
ieu-b-85.vcf	ebi-a-GCST90001575	Naive CD4+ T cell %T cell	id:ebi-a-GCST90001575	90	-0.0092462	0.0477951	0.846603	-0.102925	0.0844322	0.990796	0.902195	1.0881
ieu-b-85.vcf	ebi-a-GCST90001575	Naive CD4+ T cell %T cell	id:ebi-a-GCST90001575	90	0.00147237	0.0593128	0.980251	-0.114781	0.117726	1.00147	0.891562	1.12494
ieu-b-85.vcf	ebi-a-GCST90001948	CD33 on CD33dim HLA DR+ CD11b+	id:ebi-a-GCST90001948	70	-0.0648059	0.0509963	0.203801	-0.164759	0.0351469	0.937249	0.848098	1.03577
ieu-b-85.vcf	ebi-a-GCST90001948	CD33 on CD33dim HLA DR+ CD11b+	id:ebi-a-GCST90001948	70	-0.185015	0.100802	0.0708149	-0.382586	0.0125567	0.831092	0.682095	1.01264
ieu-b-85.vcf	ebi-a-GCST90001948	CD33 on CD33dim HLA DR+ CD11b+	id:ebi-a-GCST90001948	70	-0.0501738	0.074877	0.502804	-0.196933	0.096585	0.951064	0.821246	1.1014
ieu-b-85.vcf	ebi-a-GCST90001948	CD33 on CD33dim HLA DR+ CD11b+	id:ebi-a-GCST90001948	70	-0.0613668	0.105651	0.563237	-0.268442	0.145709	0.940478	0.764569	1.15686
ieu-b-85.vcf	ebi-a-GCST90001811	CD38 on IgD+ CD24- B cell	id:ebi-a-GCST90001811	84	0.0472622	0.0330752	0.153024	-0.0175652	0.11209	1.0484	0.982588	1.11861
ieu-b-85.vcf	ebi-a-GCST90001811	CD38 on IgD+ CD24- B cell	id:ebi-a-GCST90001811	84	0.0207161	0.068214	0.762131	-0.112983	0.154416	1.02093	0.893165	1.16698
ieu-b-85.vcf	ebi-a-GCST90001811	CD38 on IgD+ CD24- B cell	id:ebi-a-GCST90001811	84	0.0493959	0.0503411	0.326483	-0.0492727	0.148064	1.05064	0.951922	1.15959
ieu-b-85.vcf	ebi-a-GCST90001811	CD38 on IgD+ CD24- B cell	id:ebi-a-GCST90001811	84	0.0266688	0.0689893	0.700068	-0.10855	0.161888	1.02703	0.897134	1.17573
ieu-b-85.vcf	ebi-a-GCST90001819	CD38 on transitional B cell	id:ebi-a-GCST90001819	93	0.0130792	0.0325579	0.68789	-0.0507343	0.0768926	1.01317	0.950531	1.07993
ieu-b-85.vcf	ebi-a-GCST90001819	CD38 on transitional B cell	id:ebi-a-GCST90001819	93	-0.0477447	0.0657287	0.469463	-0.176573	0.0810835	0.953377	0.838138	1.08446
ieu-b-85.vcf	ebi-a-GCST90001819	CD38 on transitional B cell	id:ebi-a-GCST90001819	93	-0.0367452	0.0477782	0.441847	-0.130391	0.0569002	0.963922	0.877753	1.05855
ieu-b-85.vcf	ebi-a-GCST90001819	CD38 on transitional B cell	id:ebi-a-GCST90001819	93	-0.0471656	0.0637686	0.461403	-0.172152	0.0778207	0.953929	0.841851	1.08093
ieu-b-85.vcf	ebi-a-GCST90001960	CD25 on CD4+ T cell	id:ebi-a-GCST90001960	88	0.0324124	0.0358922	0.3665	-0.0379363	0.102761	1.03294	0.962774	1.10823
ieu-b-85.vcf	ebi-a-GCST90001960	CD25 on CD4+ T cell	id:ebi-a-GCST90001960	88	0.0321787	0.0714387	0.653529	-0.107841	0.172199	1.0327	0.89777	1.18791
ieu-b-85.vcf	ebi-a-GCST90001960	CD25 on CD4+ T cell	id:ebi-a-GCST90001960	88	0.00898273	0.0535689	0.866831	-0.0960122	0.113978	1.00902	0.908453	1.12073
ieu-b-85.vcf	ebi-a-GCST90001960	CD25 on CD4+ T cell	id:ebi-a-GCST90001960	88	0.0482584	0.0679818	0.479682	-0.084986	0.181503	1.04944	0.918525	1.19902
ieu-b-85.vcf	ebi-a-GCST90001886	CD28 on CD39+ activated CD4 regulatory T cell	id:ebi-a-GCST90001886	89	0.013742	0.0343657	0.689248	-0.0536147	0.0810987	1.01384	0.947797	1.08448
ieu-b-85.vcf	ebi-a-GCST90001886	CD28 on CD39+ activated CD4 regulatory T cell	id:ebi-a-GCST90001886	89	0.00348503	0.0688228	0.95973	-0.131408	0.138378	1.00349	0.87686	1.14841
ieu-b-85.vcf	ebi-a-GCST90001886	CD28 on CD39+ activated CD4 regulatory T cell	id:ebi-a-GCST90001886	89	0.0150385	0.0511765	0.768868	-0.0852673	0.115344	1.01515	0.918267	1.12226
ieu-b-85.vcf	ebi-a-GCST90001886	CD28 on CD39+ activated CD4 regulatory T cell	id:ebi-a-GCST90001886	89	-0.0740931	0.0792179	0.35219	-0.22936	0.0811741	0.928585	0.795042	1.08456
ieu-b-85.vcf	ebi-a-GCST90001620	HLA DR+ T cell%lymphocyte	id:ebi-a-GCST90001620	100	-0.00244966	0.0302173	0.935388	-0.0616757	0.0567763	0.997553	0.940188	1.05842
ieu-b-85.vcf	ebi-a-GCST90001620	HLA DR+ T cell%lymphocyte	id:ebi-a-GCST90001620	100	-0.00900298	0.0611196	0.883197	-0.128797	0.110791	0.991037	0.879152	1.11716
ieu-b-85.vcf	ebi-a-GCST90001620	HLA DR+ T cell%lymphocyte	id:ebi-a-GCST90001620	100	-0.0119436	0.0473809	0.800982	-0.10481	0.0809229	0.988127	0.900496	1.08429
ieu-b-85.vcf	ebi-a-GCST90001620	HLA DR+ T cell%lymphocyte	id:ebi-a-GCST90001620	100	-0.167064	0.0765613	0.0314684	-0.317124	-0.0170036	0.846146	0.72824	0.98314
ieu-b-85.vcf	ebi-a-GCST90001502	Activated & secreting CD4 regulatory T cell %CD4 regulatory T cell	id:ebi-a-GCST90001502	88	0.0124185	0.0300567	0.679483	-0.0464927	0.0713297	1.0125	0.954572	1.07394
ieu-b-85.vcf	ebi-a-GCST90001502	Activated & secreting CD4 regulatory T cell %CD4 regulatory T cell	id:ebi-a-GCST90001502	88	0.028182	0.0600152	0.639843	-0.0894478	0.145812	1.02858	0.914436	1.15698
ieu-b-85.vcf	ebi-a-GCST90001502	Activated & secreting CD4 regulatory T cell %CD4 regulatory T cell	id:ebi-a-GCST90001502	88	-0.00173443	0.0439844	0.968545	-0.0879439	0.0844751	0.998267	0.915812	1.08815
ieu-b-85.vcf	ebi-a-GCST90001502	Activated & secreting CD4 regulatory T cell %CD4 regulatory T cell	id:ebi-a-GCST90001502	88	-0.0454038	0.0592474	0.445547	-0.161529	0.0707211	0.955612	0.850842	1.07328
ieu-b-85.vcf	ebi-a-GCST90001435	Plasma Blast-Plasma Cell %lymphocyte	id:ebi-a-GCST90001435	89	-0.000722641	0.0328675	0.982459	-0.065143	0.0636977	0.999278	0.936933	1.06577
ieu-b-85.vcf	ebi-a-GCST90001435	Plasma Blast-Plasma Cell %lymphocyte	id:ebi-a-GCST90001435	89	-0.0551408	0.0664011	0.408575	-0.185287	0.0750054	0.946352	0.830866	1.07789
ieu-b-85.vcf	ebi-a-GCST90001435	Plasma Blast-Plasma Cell %lymphocyte	id:ebi-a-GCST90001435	89	0.0394812	0.0521626	0.449118	-0.0627576	0.14172	1.04027	0.939171	1.15225
ieu-b-85.vcf	ebi-a-GCST90001435	Plasma Blast-Plasma Cell %lymphocyte	id:ebi-a-GCST90001435	89	0.0380676	0.075388	0.614852	-0.109693	0.185828	1.0388	0.896109	1.20422
ieu-b-85.vcf	ebi-a-GCST90001812	CD38 on IgD+ CD38+ B cell	id:ebi-a-GCST90001812	83	-0.0120037	0.0334228	0.719486	-0.0775124	0.053505	0.988068	0.925416	1.05496
ieu-b-85.vcf	ebi-a-GCST90001812	CD38 on IgD+ CD38+ B cell	id:ebi-a-GCST90001812	83	-0.0118935	0.0665935	0.858699	-0.142417	0.11863	0.988177	0.86726	1.12595
ieu-b-85.vcf	ebi-a-GCST90001812	CD38 on IgD+ CD38+ B cell	id:ebi-a-GCST90001812	83	-0.00345603	0.0502748	0.945194	-0.101995	0.0950826	0.99655	0.903034	1.09975
ieu-b-85.vcf	ebi-a-GCST90001812	CD38 on IgD+ CD38+ B cell	id:ebi-a-GCST90001812	83	-0.00158386	0.0663966	0.981027	-0.131721	0.128553	0.998417	0.876585	1.13718
ieu-b-85.vcf	ebi-a-GCST90001438	IgD- CD38dim B cell Absolute Count	id:ebi-a-GCST90001438	95	0.0398286	0.0312081	0.201875	-0.0213392	0.100996	1.04063	0.978887	1.10627
ieu-b-85.vcf	ebi-a-GCST90001438	IgD- CD38dim B cell Absolute Count	id:ebi-a-GCST90001438	95	0.107732	0.0635808	0.0935333	-0.0168863	0.232351	1.11375	0.983256	1.26156
ieu-b-85.vcf	ebi-a-GCST90001438	IgD- CD38dim B cell Absolute Count	id:ebi-a-GCST90001438	95	0.0967167	0.0479351	0.0436267	0.00276391	0.19067	1.10155	1.00277	1.21006
ieu-b-85.vcf	ebi-a-GCST90001438	IgD- CD38dim B cell Absolute Count	id:ebi-a-GCST90001438	95	0.103909	0.069845	0.140173	-0.0329867	0.240806	1.1095	0.967551	1.27227
ieu-b-85.vcf	ebi-a-GCST90002053	CD45 on CD33+ HLA DR+	id:ebi-a-GCST90002053	71	-0.00103143	0.0508162	0.983806	-0.100631	0.0985683	0.998969	0.904266	1.10359
ieu-b-85.vcf	ebi-a-GCST90002053	CD45 on CD33+ HLA DR+	id:ebi-a-GCST90002053	71	-0.0139074	0.100335	0.890162	-0.210564	0.182749	0.986189	0.810127	1.20051
ieu-b-85.vcf	ebi-a-GCST90002053	CD45 on CD33+ HLA DR+	id:ebi-a-GCST90002053	71	0.024032	0.0754036	0.749945	-0.123759	0.171823	1.02432	0.883593	1.18747
ieu-b-85.vcf	ebi-a-GCST90002053	CD45 on CD33+ HLA DR+	id:ebi-a-GCST90002053	71	0.0637345	0.114356	0.579076	-0.160403	0.287872	1.06581	0.851801	1.33359
ieu-b-85.vcf	ebi-a-GCST90002066	CD4 on activated CD4 regulatory T cell	id:ebi-a-GCST90002066	93	-0.0150748	0.035797	0.673667	-0.0852369	0.0550872	0.985038	0.918295	1.05663
ieu-b-85.vcf	ebi-a-GCST90002066	CD4 on activated CD4 regulatory T cell	id:ebi-a-GCST90002066	93	-0.055159	0.0714577	0.442167	-0.195216	0.084898	0.946335	0.822657	1.08861
ieu-b-85.vcf	ebi-a-GCST90002066	CD4 on activated CD4 regulatory T cell	id:ebi-a-GCST90002066	93	-0.0293777	0.0527636	0.577678	-0.132794	0.0740389	0.97105	0.875645	1.07685
ieu-b-85.vcf	ebi-a-GCST90002066	CD4 on activated CD4 regulatory T cell	id:ebi-a-GCST90002066	93	-0.0704884	0.0779099	0.367965	-0.223192	0.0822149	0.931939	0.799961	1.08569
ieu-b-85.vcf	ebi-a-GCST90001413	IgD- CD24- B cell %B cell	id:ebi-a-GCST90001413	95	0.0263296	0.0323497	0.415699	-0.0370758	0.0897349	1.02668	0.963603	1.09388
ieu-b-85.vcf	ebi-a-GCST90001413	IgD- CD24- B cell %B cell	id:ebi-a-GCST90001413	95	0.0649072	0.064798	0.319094	-0.0620968	0.191911	1.06706	0.939792	1.21156
ieu-b-85.vcf	ebi-a-GCST90001413	IgD- CD24- B cell %B cell	id:ebi-a-GCST90001413	95	-0.00295673	0.0522413	0.954866	-0.10535	0.0994362	0.997048	0.90001	1.10455
ieu-b-85.vcf	ebi-a-GCST90001413	IgD- CD24- B cell %B cell	id:ebi-a-GCST90001413	95	-0.0131883	0.0779352	0.865986	-0.165941	0.139565	0.986898	0.847096	1.14977
ieu-b-85.vcf	ebi-a-GCST90001509	CD25++ CD45RA+ CD4 not regulatory T cell %T cell	id:ebi-a-GCST90001509	91	-0.0075591	0.0337431	0.822742	-0.0736956	0.0585774	0.992469	0.928954	1.06033
ieu-b-85.vcf	ebi-a-GCST90001509	CD25++ CD45RA+ CD4 not regulatory T cell %T cell	id:ebi-a-GCST90001509	91	0.0383754	0.0667758	0.566951	-0.0925053	0.169256	1.03912	0.911644	1.18442
ieu-b-85.vcf	ebi-a-GCST90001509	CD25++ CD45RA+ CD4 not regulatory T cell %T cell	id:ebi-a-GCST90001509	91	-0.00159271	0.0524463	0.975773	-0.104387	0.101202	0.998409	0.900876	1.1065
ieu-b-85.vcf	ebi-a-GCST90001509	CD25++ CD45RA+ CD4 not regulatory T cell %T cell	id:ebi-a-GCST90001509	91	0.0120886	0.0679353	0.859168	-0.121065	0.145242	1.01216	0.885977	1.15632
ieu-b-85.vcf	ebi-a-GCST90001996	CX3CR1 on CD14+ CD16+ monocyte	id:ebi-a-GCST90001996	92	-0.0192257	0.0329555	0.559635	-0.0838184	0.045367	0.980958	0.919598	1.04641
ieu-b-85.vcf	ebi-a-GCST90001996	CX3CR1 on CD14+ CD16+ monocyte	id:ebi-a-GCST90001996	92	-0.0164935	0.0663032	0.804114	-0.146448	0.113461	0.983642	0.863771	1.12015
ieu-b-85.vcf	ebi-a-GCST90001996	CX3CR1 on CD14+ CD16+ monocyte	id:ebi-a-GCST90001996	92	-0.00574808	0.0516884	0.911453	-0.107057	0.0955613	0.994268	0.898474	1.10028
ieu-b-85.vcf	ebi-a-GCST90001996	CX3CR1 on CD14+ CD16+ monocyte	id:ebi-a-GCST90001996	92	0.0211584	0.0721417	0.769968	-0.120239	0.162556	1.02138	0.886708	1.17651
ieu-b-85.vcf	ebi-a-GCST90001660	CD39+ CD4+ T cell Absolute Count	id:ebi-a-GCST90001660	94	0.00944111	0.0333419	0.777054	-0.055909	0.0747912	1.00949	0.945625	1.07766
ieu-b-85.vcf	ebi-a-GCST90001660	CD39+ CD4+ T cell Absolute Count	id:ebi-a-GCST90001660	94	0.0291623	0.0664973	0.662017	-0.101172	0.159497	1.02959	0.903777	1.17292
ieu-b-85.vcf	ebi-a-GCST90001660	CD39+ CD4+ T cell Absolute Count	id:ebi-a-GCST90001660	94	0.018578	0.0487108	0.702911	-0.0768952	0.114051	1.01875	0.925987	1.12081
ieu-b-85.vcf	ebi-a-GCST90001660	CD39+ CD4+ T cell Absolute Count	id:ebi-a-GCST90001660	94	0.0310682	0.083542	0.710823	-0.132674	0.194811	1.03156	0.87575	1.21508
ieu-b-85.vcf	ebi-a-GCST90001460	Plasmacytoid Dendritic Cell Absolute Count	id:ebi-a-GCST90001460	94	-0.0150525	0.0311848	0.629319	-0.0761747	0.0460698	0.98506	0.926654	1.04715
ieu-b-85.vcf	ebi-a-GCST90001460	Plasmacytoid Dendritic Cell Absolute Count	id:ebi-a-GCST90001460	94	0.0158707	0.0630548	0.801837	-0.107717	0.139458	1.016	0.897882	1.14965
ieu-b-85.vcf	ebi-a-GCST90001460	Plasmacytoid Dendritic Cell Absolute Count	id:ebi-a-GCST90001460	94	-0.0260092	0.0484499	0.591387	-0.120971	0.0689526	0.974326	0.88606	1.07139
ieu-b-85.vcf	ebi-a-GCST90001460	Plasmacytoid Dendritic Cell Absolute Count	id:ebi-a-GCST90001460	94	-0.0337343	0.0741422	0.650173	-0.179053	0.111584	0.966828	0.836062	1.11805
ieu-b-85.vcf	ebi-a-GCST90001870	CD34 on Hematopoietic Stem Cell	id:ebi-a-GCST90001870	75	0.00863051	0.0493909	0.861285	-0.0881756	0.105437	1.00867	0.9156	1.1112
ieu-b-85.vcf	ebi-a-GCST90001870	CD34 on Hematopoietic Stem Cell	id:ebi-a-GCST90001870	75	-0.0535779	0.10087	0.596921	-0.251283	0.144127	0.947832	0.777803	1.15503
ieu-b-85.vcf	ebi-a-GCST90001870	CD34 on Hematopoietic Stem Cell	id:ebi-a-GCST90001870	75	-0.0452715	0.0715472	0.526897	-0.185504	0.0949611	0.955738	0.830685	1.09962
ieu-b-85.vcf	ebi-a-GCST90001870	CD34 on Hematopoietic Stem Cell	id:ebi-a-GCST90001870	75	-0.0966118	0.109358	0.379857	-0.310954	0.11773	0.907908	0.732748	1.12494
ieu-b-85.vcf	ebi-a-GCST90001761	CD20 on switched memory B cell	id:ebi-a-GCST90001761	93	-0.00159021	0.0323635	0.960811	-0.0650226	0.0618422	0.998411	0.937046	1.06379
ieu-b-85.vcf	ebi-a-GCST90001761	CD20 on switched memory B cell	id:ebi-a-GCST90001761	93	-0.00920296	0.0657067	0.888921	-0.137988	0.119582	0.990839	0.871109	1.12703
ieu-b-85.vcf	ebi-a-GCST90001761	CD20 on switched memory B cell	id:ebi-a-GCST90001761	93	-0.00582342	0.0466605	0.900679	-0.0972781	0.0856312	0.994193	0.907304	1.0894
ieu-b-85.vcf	ebi-a-GCST90001761	CD20 on switched memory B cell	id:ebi-a-GCST90001761	93	-0.00981127	0.0629133	0.876415	-0.133121	0.113499	0.990237	0.875359	1.12019
ieu-b-85.vcf	ebi-a-GCST90001780	CD25 on IgD+ CD38- B cell	id:ebi-a-GCST90001780	90	-0.0267996	0.0327835	0.413658	-0.0910551	0.037456	0.973556	0.912967	1.03817
ieu-b-85.vcf	ebi-a-GCST90001780	CD25 on IgD+ CD38- B cell	id:ebi-a-GCST90001780	90	0.0164732	0.0660906	0.803747	-0.113064	0.146011	1.01661	0.893093	1.15721
ieu-b-85.vcf	ebi-a-GCST90001780	CD25 on IgD+ CD38- B cell	id:ebi-a-GCST90001780	90	-0.0115543	0.0511746	0.821371	-0.111857	0.088748	0.988512	0.894173	1.09281
ieu-b-85.vcf	ebi-a-GCST90001780	CD25 on IgD+ CD38- B cell	id:ebi-a-GCST90001780	90	-0.0181974	0.0724491	0.802257	-0.160198	0.123803	0.981967	0.851975	1.13179
ieu-b-85.vcf	ebi-a-GCST90001731	CD19 on IgD- CD24- B cell	id:ebi-a-GCST90001731	91	0.0172501	0.0323508	0.593882	-0.0461576	0.0806577	1.0174	0.954891	1.084
ieu-b-85.vcf	ebi-a-GCST90001731	CD19 on IgD- CD24- B cell	id:ebi-a-GCST90001731	91	0.033688	0.0658541	0.610229	-0.0953861	0.162762	1.03426	0.909022	1.17676
ieu-b-85.vcf	ebi-a-GCST90001731	CD19 on IgD- CD24- B cell	id:ebi-a-GCST90001731	91	0.0170042	0.0515065	0.741296	-0.0839485	0.117957	1.01715	0.919479	1.1252
ieu-b-85.vcf	ebi-a-GCST90001731	CD19 on IgD- CD24- B cell	id:ebi-a-GCST90001731	91	-0.0135468	0.0906348	0.88152	-0.191191	0.164097	0.986545	0.825975	1.17833
ieu-b-85.vcf	ebi-a-GCST90001494	Secreting CD4 regulatory T cell %CD4+ T cell	id:ebi-a-GCST90001494	74	0.0982868	0.0390148	0.0117615	0.0218178	0.174756	1.10328	1.02206	1.19096
ieu-b-85.vcf	ebi-a-GCST90001494	Secreting CD4 regulatory T cell %CD4+ T cell	id:ebi-a-GCST90001494	74	0.207314	0.080159	0.0117233	0.0502025	0.364426	1.23037	1.05148	1.43969
ieu-b-85.vcf	ebi-a-GCST90001494	Secreting CD4 regulatory T cell %CD4+ T cell	id:ebi-a-GCST90001494	74	0.102705	0.0593984	0.0837938	-0.013716	0.219126	1.10816	0.986378	1.24499
ieu-b-85.vcf	ebi-a-GCST90001494	Secreting CD4 regulatory T cell %CD4+ T cell	id:ebi-a-GCST90001494	74	0.285041	0.0901503	0.00228385	0.108347	0.461736	1.32982	1.11443	1.58683
ieu-b-85.vcf	ebi-a-GCST90002035	CD80 on myeloid Dendritic Cell	id:ebi-a-GCST90002035	91	0.0205901	0.0365404	0.573103	-0.0510292	0.0922093	1.0208	0.950251	1.09659
ieu-b-85.vcf	ebi-a-GCST90002035	CD80 on myeloid Dendritic Cell	id:ebi-a-GCST90002035	91	0.0155471	0.0761365	0.838664	-0.133681	0.164775	1.01567	0.87487	1.17913
ieu-b-85.vcf	ebi-a-GCST90002035	CD80 on myeloid Dendritic Cell	id:ebi-a-GCST90002035	91	0.018893	0.0544317	0.728519	-0.0877931	0.125579	1.01907	0.91595	1.1338
ieu-b-85.vcf	ebi-a-GCST90002035	CD80 on myeloid Dendritic Cell	id:ebi-a-GCST90002035	91	0.00339528	0.0795661	0.966057	-0.152554	0.159345	1.0034	0.858512	1.17274
ieu-b-85.vcf	ebi-a-GCST90001621	Natural Killer T Absolute Count	id:ebi-a-GCST90001621	99	-0.0436042	0.0324411	0.178914	-0.107189	0.0199803	0.957333	0.898356	1.02018
ieu-b-85.vcf	ebi-a-GCST90001621	Natural Killer T Absolute Count	id:ebi-a-GCST90001621	99	-0.14182	0.0666519	0.0358909	-0.272458	-0.0111825	0.867777	0.761505	0.98888
ieu-b-85.vcf	ebi-a-GCST90001621	Natural Killer T Absolute Count	id:ebi-a-GCST90001621	99	-0.0515832	0.0485751	0.288268	-0.14679	0.0436239	0.949725	0.863475	1.04459
ieu-b-85.vcf	ebi-a-GCST90001621	Natural Killer T Absolute Count	id:ebi-a-GCST90001621	99	-0.071853	0.068807	0.29893	-0.206715	0.0630086	0.930668	0.813252	1.06504
ieu-b-85.vcf	ebi-a-GCST90002095	CD11b on CD33dim HLA DR-	id:ebi-a-GCST90002095	73	-0.0948199	0.0517342	0.0668282	-0.196219	0.00657914	0.909537	0.821832	1.0066
ieu-b-85.vcf	ebi-a-GCST90002095	CD11b on CD33dim HLA DR-	id:ebi-a-GCST90002095	73	-0.215051	0.102278	0.0390454	-0.415516	-0.0145871	0.8065	0.66	0.985519
ieu-b-85.vcf	ebi-a-GCST90002095	CD11b on CD33dim HLA DR-	id:ebi-a-GCST90002095	73	-0.105157	0.0766127	0.169885	-0.255318	0.0450044	0.900184	0.77467	1.04603
ieu-b-85.vcf	ebi-a-GCST90002095	CD11b on CD33dim HLA DR-	id:ebi-a-GCST90002095	73	-0.0319475	0.109935	0.772191	-0.247421	0.183526	0.968557	0.780812	1.20145
ieu-b-85.vcf	ebi-a-GCST90001782	CD25 on IgD+ CD38- unswitched memory B cell	id:ebi-a-GCST90001782	74	0.00639312	0.0465458	0.890753	-0.0848367	0.0976229	1.00641	0.918662	1.10255
ieu-b-85.vcf	ebi-a-GCST90001782	CD25 on IgD+ CD38- unswitched memory B cell	id:ebi-a-GCST90001782	74	-0.0141746	0.0928339	0.879072	-0.196129	0.16778	0.985925	0.821906	1.18268
ieu-b-85.vcf	ebi-a-GCST90001782	CD25 on IgD+ CD38- unswitched memory B cell	id:ebi-a-GCST90001782	74	-0.0276979	0.0666182	0.677578	-0.15827	0.102874	0.972682	0.85362	1.10835
ieu-b-85.vcf	ebi-a-GCST90001782	CD25 on IgD+ CD38- unswitched memory B cell	id:ebi-a-GCST90001782	74	-0.0611693	0.0904101	0.500813	-0.238373	0.116034	0.940664	0.787909	1.12303
ieu-b-85.vcf	ebi-a-GCST90001425	IgD- CD38+ B cell %lymphocyte	id:ebi-a-GCST90001425	88	0.0137807	0.0313423	0.660167	-0.0476503	0.0752117	1.01388	0.953467	1.07811
ieu-b-85.vcf	ebi-a-GCST90001425	IgD- CD38+ B cell %lymphocyte	id:ebi-a-GCST90001425	88	-0.0115487	0.0640692	0.857377	-0.137124	0.114027	0.988518	0.871862	1.12078
ieu-b-85.vcf	ebi-a-GCST90001425	IgD- CD38+ B cell %lymphocyte	id:ebi-a-GCST90001425	88	0.00882623	0.0489482	0.856903	-0.0871122	0.104765	1.00887	0.916574	1.11045
ieu-b-85.vcf	ebi-a-GCST90001425	IgD- CD38+ B cell %lymphocyte	id:ebi-a-GCST90001425	88	0.0188438	0.0679256	0.782117	-0.11429	0.151978	1.01902	0.891999	1.16413
ieu-b-85.vcf	ebi-a-GCST90001715	BAFF-R on memory B cell	id:ebi-a-GCST90001715	92	-0.00620729	0.033246	0.85189	-0.0713694	0.0589548	0.993812	0.931118	1.06073
ieu-b-85.vcf	ebi-a-GCST90001715	BAFF-R on memory B cell	id:ebi-a-GCST90001715	92	0.0328799	0.0687802	0.633779	-0.101929	0.167689	1.03343	0.903093	1.18257
ieu-b-85.vcf	ebi-a-GCST90001715	BAFF-R on memory B cell	id:ebi-a-GCST90001715	92	0.0131546	0.0513067	0.797649	-0.0874066	0.113716	1.01324	0.916304	1.12043
ieu-b-85.vcf	ebi-a-GCST90001715	BAFF-R on memory B cell	id:ebi-a-GCST90001715	92	0.0271145	0.0715332	0.705535	-0.11309	0.16732	1.02749	0.89307	1.18213
ieu-b-85.vcf	ebi-a-GCST90002031	CD39 on CD39+ secreting CD4 regulatory T cell	id:ebi-a-GCST90002031	90	0.00295246	0.0364069	0.935366	-0.0684051	0.07431	1.00296	0.933882	1.07714
ieu-b-85.vcf	ebi-a-GCST90002031	CD39 on CD39+ secreting CD4 regulatory T cell	id:ebi-a-GCST90002031	90	0.00974676	0.0736373	0.895	-0.134582	0.154076	1.00979	0.874081	1.16658
ieu-b-85.vcf	ebi-a-GCST90002031	CD39 on CD39+ secreting CD4 regulatory T cell	id:ebi-a-GCST90002031	90	-0.0305106	0.0524966	0.561111	-0.133404	0.0723827	0.96995	0.875112	1.07507
ieu-b-85.vcf	ebi-a-GCST90002031	CD39 on CD39+ secreting CD4 regulatory T cell	id:ebi-a-GCST90002031	90	-0.0326701	0.0651209	0.617129	-0.160307	0.0949668	0.967858	0.851882	1.09962
ieu-b-85.vcf	ebi-a-GCST90001701	BAFF-R on CD20- CD38- B cell	id:ebi-a-GCST90001701	90	0.0542974	0.0321671	0.0914152	-0.00875011	0.117345	1.0558	0.991288	1.12451
ieu-b-85.vcf	ebi-a-GCST90001701	BAFF-R on CD20- CD38- B cell	id:ebi-a-GCST90001701	90	0.0577823	0.0653634	0.379096	-0.0703299	0.185894	1.05948	0.932086	1.2043
ieu-b-85.vcf	ebi-a-GCST90001701	BAFF-R on CD20- CD38- B cell	id:ebi-a-GCST90001701	90	0.0726795	0.0505693	0.150654	-0.0264363	0.171795	1.07539	0.97391	1.18743
ieu-b-85.vcf	ebi-a-GCST90001701	BAFF-R on CD20- CD38- B cell	id:ebi-a-GCST90001701	90	0.116694	0.0644476	0.0735654	-0.00962361	0.243011	1.12378	0.990423	1.27508
ieu-b-85.vcf	ebi-a-GCST90001405	Plasma Blast-Plasma Cell Absolute Count	id:ebi-a-GCST90001405	83	-0.00344075	0.0327281	0.916271	-0.0675878	0.0607063	0.996565	0.934646	1.06259
ieu-b-85.vcf	ebi-a-GCST90001405	Plasma Blast-Plasma Cell Absolute Count	id:ebi-a-GCST90001405	83	-0.0299863	0.0661149	0.651367	-0.159571	0.0995989	0.970459	0.852509	1.10473
ieu-b-85.vcf	ebi-a-GCST90001405	Plasma Blast-Plasma Cell Absolute Count	id:ebi-a-GCST90001405	83	0.000141395	0.052166	0.997837	-0.102104	0.102387	1.00014	0.902936	1.10781
ieu-b-85.vcf	ebi-a-GCST90001405	Plasma Blast-Plasma Cell Absolute Count	id:ebi-a-GCST90001405	83	-0.0202013	0.0829284	0.80815	-0.182741	0.142338	0.980001	0.832984	1.15297
ieu-b-85.vcf	ebi-a-GCST90002105	HLA DR on plasmacytoid Dendritic Cell	id:ebi-a-GCST90002105	94	0.00120349	0.0354568	0.972923	-0.0682919	0.0706989	1.0012	0.933988	1.07326
ieu-b-85.vcf	ebi-a-GCST90002105	HLA DR on plasmacytoid Dendritic Cell	id:ebi-a-GCST90002105	94	-0.025576	0.0721533	0.7238	-0.166997	0.115845	0.974748	0.846203	1.12282
ieu-b-85.vcf	ebi-a-GCST90002105	HLA DR on plasmacytoid Dendritic Cell	id:ebi-a-GCST90002105	94	0.011203	0.049558	0.821156	-0.0859306	0.108337	1.01127	0.917658	1.11442
ieu-b-85.vcf	ebi-a-GCST90002105	HLA DR on plasmacytoid Dendritic Cell	id:ebi-a-GCST90002105	94	0.0373998	0.0719687	0.60453	-0.103659	0.178458	1.03811	0.901533	1.19537
ieu-b-85.vcf	ebi-a-GCST90001800	CD27 on IgD+ CD24+ B cell	id:ebi-a-GCST90001800	93	-0.0051472	0.0325581	0.874384	-0.0689611	0.0586667	0.994866	0.933363	1.06042
ieu-b-85.vcf	ebi-a-GCST90001800	CD27 on IgD+ CD24+ B cell	id:ebi-a-GCST90001800	93	-0.00827539	0.0660228	0.90053	-0.13768	0.121129	0.991759	0.871378	1.12877
ieu-b-85.vcf	ebi-a-GCST90001800	CD27 on IgD+ CD24+ B cell	id:ebi-a-GCST90001800	93	0.00867083	0.0464911	0.852049	-0.0824517	0.0997934	1.00871	0.920856	1.10494
ieu-b-85.vcf	ebi-a-GCST90001800	CD27 on IgD+ CD24+ B cell	id:ebi-a-GCST90001800	93	-0.00355746	0.0669422	0.957734	-0.134764	0.127649	0.996449	0.873922	1.13615
ieu-b-85.vcf	ebi-a-GCST90001725	CD19 on IgD+ CD24- B cell	id:ebi-a-GCST90001725	91	-0.0263667	0.0318948	0.408421	-0.0888805	0.0361472	0.973978	0.914955	1.03681
ieu-b-85.vcf	ebi-a-GCST90001725	CD19 on IgD+ CD24- B cell	id:ebi-a-GCST90001725	91	-0.0681649	0.0641912	0.291153	-0.19398	0.0576499	0.934106	0.823675	1.05934
ieu-b-85.vcf	ebi-a-GCST90001725	CD19 on IgD+ CD24- B cell	id:ebi-a-GCST90001725	91	-0.00360482	0.0475714	0.939597	-0.0968448	0.0896351	0.996402	0.907697	1.09378
ieu-b-85.vcf	ebi-a-GCST90001725	CD19 on IgD+ CD24- B cell	id:ebi-a-GCST90001725	91	-0.00543094	0.0617079	0.930064	-0.126379	0.115517	0.994584	0.881281	1.12245
ieu-b-85.vcf	ebi-a-GCST90001703	BAFF-R on IgD+ CD24+ B cell	id:ebi-a-GCST90001703	90	0.00690853	0.0334495	0.836372	-0.0586525	0.0724696	1.00693	0.943034	1.07516
ieu-b-85.vcf	ebi-a-GCST90001703	BAFF-R on IgD+ CD24+ B cell	id:ebi-a-GCST90001703	90	0.0112535	0.0689478	0.870721	-0.123884	0.146391	1.01132	0.883482	1.15765
ieu-b-85.vcf	ebi-a-GCST90001703	BAFF-R on IgD+ CD24+ B cell	id:ebi-a-GCST90001703	90	0.0316999	0.052395	0.545168	-0.0709943	0.134394	1.03221	0.931467	1.14384
ieu-b-85.vcf	ebi-a-GCST90001703	BAFF-R on IgD+ CD24+ B cell	id:ebi-a-GCST90001703	90	0.0598183	0.0762598	0.434887	-0.0896509	0.209288	1.06164	0.91425	1.2328
ieu-b-85.vcf	ebi-a-GCST90001459	Myeloid Dendritic Cell %Dendritic Cell	id:ebi-a-GCST90001459	89	0.0246398	0.0344617	0.474614	-0.0429051	0.0921847	1.02495	0.958002	1.09657
ieu-b-85.vcf	ebi-a-GCST90001459	Myeloid Dendritic Cell %Dendritic Cell	id:ebi-a-GCST90001459	89	0.0328144	0.067502	0.628101	-0.0994895	0.165118	1.03336	0.905299	1.17953
ieu-b-85.vcf	ebi-a-GCST90001459	Myeloid Dendritic Cell %Dendritic Cell	id:ebi-a-GCST90001459	89	0.00981202	0.0493144	0.842287	-0.0868442	0.106468	1.00986	0.91682	1.11234
ieu-b-85.vcf	ebi-a-GCST90001459	Myeloid Dendritic Cell %Dendritic Cell	id:ebi-a-GCST90001459	89	0.00944998	0.0622602	0.879706	-0.11258	0.13148	1.00949	0.893526	1.14052
ieu-b-85.vcf	ebi-a-GCST90001742	CD19 on transitional B cell	id:ebi-a-GCST90001742	96	0.0288617	0.0321825	0.369818	-0.034216	0.0919394	1.02928	0.966363	1.0963
ieu-b-85.vcf	ebi-a-GCST90001742	CD19 on transitional B cell	id:ebi-a-GCST90001742	96	0.0143929	0.0647067	0.824459	-0.112432	0.141218	1.0145	0.893658	1.15168
ieu-b-85.vcf	ebi-a-GCST90001742	CD19 on transitional B cell	id:ebi-a-GCST90001742	96	0.0387531	0.0489309	0.428363	-0.0571515	0.134658	1.03951	0.944451	1.14415
ieu-b-85.vcf	ebi-a-GCST90001742	CD19 on transitional B cell	id:ebi-a-GCST90001742	96	0.0757201	0.0673408	0.263663	-0.0562679	0.207708	1.07866	0.945286	1.23085
ieu-b-85.vcf	ebi-a-GCST90001645	Natural Killer Absolute Count	id:ebi-a-GCST90001645	96	-0.0492077	0.0311367	0.114021	-0.110236	0.0118203	0.951983	0.895623	1.01189
ieu-b-85.vcf	ebi-a-GCST90001645	Natural Killer Absolute Count	id:ebi-a-GCST90001645	96	-0.0878206	0.0629723	0.166427	-0.211246	0.0356052	0.915925	0.809575	1.03625
ieu-b-85.vcf	ebi-a-GCST90001645	Natural Killer Absolute Count	id:ebi-a-GCST90001645	96	-0.053766	0.0505502	0.287502	-0.152844	0.0453123	0.947654	0.858263	1.04635
ieu-b-85.vcf	ebi-a-GCST90001645	Natural Killer Absolute Count	id:ebi-a-GCST90001645	96	-0.130379	0.0824136	0.116971	-0.29191	0.0311516	0.877763	0.746836	1.03164
ieu-b-85.vcf	ebi-a-GCST90001409	Naive-mature B cell Absolute Count	id:ebi-a-GCST90001409	83	-0.0035346	0.0334119	0.91575	-0.069022	0.0619528	0.996472	0.933306	1.06391
ieu-b-85.vcf	ebi-a-GCST90001409	Naive-mature B cell Absolute Count	id:ebi-a-GCST90001409	83	-0.0217045	0.0679153	0.750108	-0.154819	0.11141	0.978529	0.856571	1.11785
ieu-b-85.vcf	ebi-a-GCST90001409	Naive-mature B cell Absolute Count	id:ebi-a-GCST90001409	83	-0.0105572	0.0540586	0.845164	-0.116512	0.0953976	0.989498	0.890019	1.1001
ieu-b-85.vcf	ebi-a-GCST90001409	Naive-mature B cell Absolute Count	id:ebi-a-GCST90001409	83	0.0218139	0.080573	0.787275	-0.136109	0.179737	1.02205	0.872747	1.1969
ieu-b-85.vcf	ebi-a-GCST90001949	CD33 on CD33dim HLA DR+ CD11b-	id:ebi-a-GCST90001949	72	-0.0522366	0.050668	0.30256	-0.151546	0.0470727	0.949104	0.859378	1.0482
ieu-b-85.vcf	ebi-a-GCST90001949	CD33 on CD33dim HLA DR+ CD11b-	id:ebi-a-GCST90001949	72	-0.149896	0.0991253	0.134988	-0.344181	0.0443896	0.860798	0.7088	1.04539
ieu-b-85.vcf	ebi-a-GCST90001949	CD33 on CD33dim HLA DR+ CD11b-	id:ebi-a-GCST90001949	72	-0.053695	0.0769748	0.485448	-0.204566	0.0971756	0.947721	0.815001	1.10205
ieu-b-85.vcf	ebi-a-GCST90001949	CD33 on CD33dim HLA DR+ CD11b-	id:ebi-a-GCST90001949	72	0.0519365	0.106296	0.626627	-0.156403	0.260276	1.05331	0.855215	1.29729
ieu-b-85.vcf	ebi-a-GCST90001607	CD8+ T cell %leukocyte	id:ebi-a-GCST90001607	101	0.0211868	0.0313016	0.498495	-0.0401643	0.0825379	1.02141	0.960632	1.08604
ieu-b-85.vcf	ebi-a-GCST90001607	CD8+ T cell %leukocyte	id:ebi-a-GCST90001607	101	0.0398993	0.0624962	0.52467	-0.0825932	0.162392	1.04071	0.920726	1.17632
ieu-b-85.vcf	ebi-a-GCST90001607	CD8+ T cell %leukocyte	id:ebi-a-GCST90001607	101	0.0164047	0.0496919	0.741303	-0.0809914	0.113801	1.01654	0.922202	1.12053
ieu-b-85.vcf	ebi-a-GCST90001607	CD8+ T cell %leukocyte	id:ebi-a-GCST90001607	101	-0.0139216	0.0796953	0.86168	-0.170124	0.142281	0.986175	0.84356	1.1529
ieu-b-85.vcf	ebi-a-GCST90001429	IgD+ CD38+ B cell %lymphocyte	id:ebi-a-GCST90001429	93	0.0278454	0.031796	0.381165	-0.0344748	0.0901657	1.02824	0.966113	1.09436
ieu-b-85.vcf	ebi-a-GCST90001429	IgD+ CD38+ B cell %lymphocyte	id:ebi-a-GCST90001429	93	0.0153596	0.0647962	0.813155	-0.111641	0.14236	1.01548	0.894365	1.15299
ieu-b-85.vcf	ebi-a-GCST90001429	IgD+ CD38+ B cell %lymphocyte	id:ebi-a-GCST90001429	93	0.00292219	0.0518457	0.955053	-0.0986954	0.10454	1.00293	0.906019	1.1102
ieu-b-85.vcf	ebi-a-GCST90001429	IgD+ CD38+ B cell %lymphocyte	id:ebi-a-GCST90001429	93	-0.00145925	0.0661047	0.982436	-0.131024	0.128106	0.998542	0.877196	1.13667
ieu-b-85.vcf	ebi-a-GCST90001565	Central Memory CD4-CD8- T cell %T cell	id:ebi-a-GCST90001565	94	-0.0239379	0.0281398	0.394948	-0.079092	0.0312161	0.976346	0.923955	1.03171
ieu-b-85.vcf	ebi-a-GCST90001565	Central Memory CD4-CD8- T cell %T cell	id:ebi-a-GCST90001565	94	-0.0345299	0.0577246	0.551187	-0.14767	0.0786103	0.966059	0.862716	1.08178
ieu-b-85.vcf	ebi-a-GCST90001565	Central Memory CD4-CD8- T cell %T cell	id:ebi-a-GCST90001565	94	-0.0162129	0.0419347	0.699035	-0.0984049	0.0659791	0.983918	0.906282	1.0682
ieu-b-85.vcf	ebi-a-GCST90001565	Central Memory CD4-CD8- T cell %T cell	id:ebi-a-GCST90001565	94	-0.00847169	0.0588157	0.885782	-0.123751	0.106807	0.991564	0.8836	1.11272
ieu-b-85.vcf	ebi-a-GCST90001993	PDL-1 on CD14+ CD16- monocyte	id:ebi-a-GCST90001993	94	0.0677696	0.0321934	0.0352848	0.00467046	0.130869	1.07012	1.00468	1.13982
ieu-b-85.vcf	ebi-a-GCST90001993	PDL-1 on CD14+ CD16- monocyte	id:ebi-a-GCST90001993	94	0.0721378	0.0657278	0.275277	-0.0566887	0.200964	1.0748	0.944888	1.22258
ieu-b-85.vcf	ebi-a-GCST90001993	PDL-1 on CD14+ CD16- monocyte	id:ebi-a-GCST90001993	94	0.0673673	0.0504142	0.181459	-0.0314445	0.166179	1.06969	0.969045	1.18078
ieu-b-85.vcf	ebi-a-GCST90001993	PDL-1 on CD14+ CD16- monocyte	id:ebi-a-GCST90001993	94	0.0286393	0.0719317	0.691435	-0.112347	0.169625	1.02905	0.893734	1.18486
ieu-b-85.vcf	ebi-a-GCST90001697	CD45RA- CD28- CD8+ T cell %T cell	id:ebi-a-GCST90001697	89	-0.0349709	0.165597	0.832747	-0.359542	0.2896	0.965634	0.697996	1.33589
ieu-b-85.vcf	ebi-a-GCST90001697	CD45RA- CD28- CD8+ T cell %T cell	id:ebi-a-GCST90001697	89	-0.180372	0.338425	0.59541	-0.843685	0.482941	0.83496	0.430123	1.62083
ieu-b-85.vcf	ebi-a-GCST90001697	CD45RA- CD28- CD8+ T cell %T cell	id:ebi-a-GCST90001697	89	-0.138316	0.249015	0.578586	-0.626385	0.349753	0.870824	0.534521	1.41872
ieu-b-85.vcf	ebi-a-GCST90001697	CD45RA- CD28- CD8+ T cell %T cell	id:ebi-a-GCST90001697	89	-0.37195	0.350939	0.292103	-1.05979	0.31589	0.689389	0.346529	1.37148
ieu-b-85.vcf	ebi-a-GCST90001805	CD27 on memory B cell	id:ebi-a-GCST90001805	92	0.0330032	0.0328302	0.314766	-0.0313439	0.0973503	1.03355	0.969142	1.10225
ieu-b-85.vcf	ebi-a-GCST90001805	CD27 on memory B cell	id:ebi-a-GCST90001805	92	0.055495	0.0655887	0.399737	-0.0730588	0.184049	1.05706	0.929546	1.20207
ieu-b-85.vcf	ebi-a-GCST90001805	CD27 on memory B cell	id:ebi-a-GCST90001805	92	0.0094385	0.0490491	0.847406	-0.0866977	0.105575	1.00948	0.916954	1.11135
ieu-b-85.vcf	ebi-a-GCST90001805	CD27 on memory B cell	id:ebi-a-GCST90001805	92	-0.0253066	0.0708874	0.721921	-0.164246	0.113633	0.975011	0.848533	1.12034
ieu-b-85.vcf	ebi-a-GCST90001854	CD3 on CD39+ activated CD4 regulatory T cell	id:ebi-a-GCST90001854	90	0.0421426	0.0357728	0.238771	-0.0279721	0.112257	1.04304	0.972416	1.1188
ieu-b-85.vcf	ebi-a-GCST90001854	CD3 on CD39+ activated CD4 regulatory T cell	id:ebi-a-GCST90001854	90	0.105693	0.0716613	0.143807	-0.0347626	0.24615	1.11148	0.965835	1.27909
ieu-b-85.vcf	ebi-a-GCST90001854	CD3 on CD39+ activated CD4 regulatory T cell	id:ebi-a-GCST90001854	90	0.0302571	0.0550693	0.582706	-0.0776788	0.138193	1.03072	0.925262	1.1482
ieu-b-85.vcf	ebi-a-GCST90001854	CD3 on CD39+ activated CD4 regulatory T cell	id:ebi-a-GCST90001854	90	0.0343656	0.0719554	0.634108	-0.106667	0.175398	1.03496	0.898825	1.19172
ieu-b-85.vcf	ebi-a-GCST90001615	TCRgd T cell Absolute Count	id:ebi-a-GCST90001615	96	-0.0871453	0.0315595	0.00575721	-0.149002	-0.0252886	0.916544	0.861567	0.975028
ieu-b-85.vcf	ebi-a-GCST90001615	TCRgd T cell Absolute Count	id:ebi-a-GCST90001615	96	-0.111815	0.0633292	0.0807077	-0.23594	0.0123103	0.89421	0.789828	1.01239
ieu-b-85.vcf	ebi-a-GCST90001615	TCRgd T cell Absolute Count	id:ebi-a-GCST90001615	96	-0.102974	0.0480861	0.0322378	-0.197223	-0.00872517	0.902151	0.821008	0.991313
ieu-b-85.vcf	ebi-a-GCST90001615	TCRgd T cell Absolute Count	id:ebi-a-GCST90001615	96	-0.119507	0.0795104	0.136148	-0.275347	0.0363337	0.887358	0.759308	1.037
ieu-b-85.vcf	ebi-a-GCST90001525	CD33dim HLA DR+ CD11b+ Absolute Count	id:ebi-a-GCST90001525	84	-0.0129717	0.0440906	0.768601	-0.0993893	0.073446	0.987112	0.90539	1.07621
ieu-b-85.vcf	ebi-a-GCST90001525	CD33dim HLA DR+ CD11b+ Absolute Count	id:ebi-a-GCST90001525	84	-0.0186229	0.0871741	0.831367	-0.189484	0.152238	0.981549	0.827386	1.16444
ieu-b-85.vcf	ebi-a-GCST90001525	CD33dim HLA DR+ CD11b+ Absolute Count	id:ebi-a-GCST90001525	84	-0.0217656	0.0626004	0.728072	-0.144462	0.100931	0.97847	0.865488	1.1062
ieu-b-85.vcf	ebi-a-GCST90001525	CD33dim HLA DR+ CD11b+ Absolute Count	id:ebi-a-GCST90001525	84	-0.00984394	0.0848532	0.907924	-0.176156	0.156468	0.990204	0.838487	1.16937
ieu-b-85.vcf	ebi-a-GCST90002067	CD4 on CD39+ activated CD4 regulatory T cell	id:ebi-a-GCST90002067	94	-0.0107686	0.0355548	0.761988	-0.0804561	0.0589189	0.989289	0.922695	1.06069
ieu-b-85.vcf	ebi-a-GCST90002067	CD4 on CD39+ activated CD4 regulatory T cell	id:ebi-a-GCST90002067	94	-0.0559047	0.0715924	0.436881	-0.196226	0.0844164	0.945629	0.821827	1.08808
ieu-b-85.vcf	ebi-a-GCST90002067	CD4 on CD39+ activated CD4 regulatory T cell	id:ebi-a-GCST90002067	94	-0.00388351	0.0528605	0.941434	-0.10749	0.0997231	0.996124	0.898085	1.10486
ieu-b-85.vcf	ebi-a-GCST90002067	CD4 on CD39+ activated CD4 regulatory T cell	id:ebi-a-GCST90002067	94	-0.0408049	0.0770767	0.597785	-0.191875	0.110265	0.960016	0.82541	1.11657
ieu-b-85.vcf	ebi-a-GCST90001859	CD3 on CD8+ T cell	id:ebi-a-GCST90001859	91	0.00447981	0.035798	0.900412	-0.0656843	0.0746439	1.00449	0.936426	1.0775
ieu-b-85.vcf	ebi-a-GCST90001859	CD3 on CD8+ T cell	id:ebi-a-GCST90001859	91	0.0577392	0.071442	0.421132	-0.082287	0.197765	1.05944	0.921008	1.21868
ieu-b-85.vcf	ebi-a-GCST90001859	CD3 on CD8+ T cell	id:ebi-a-GCST90001859	91	0.047414	0.0545752	0.384966	-0.0595535	0.154381	1.04856	0.942185	1.16694
ieu-b-85.vcf	ebi-a-GCST90001859	CD3 on CD8+ T cell	id:ebi-a-GCST90001859	91	0.0772967	0.0790144	0.330568	-0.0775716	0.232165	1.08036	0.925361	1.26133
ieu-b-85.vcf	ebi-a-GCST90001625	HLA DR+ CD4+ T cell %T cell	id:ebi-a-GCST90001625	85	0.0186862	0.0292462	0.522869	-0.0386363	0.0760087	1.01886	0.962101	1.07897
ieu-b-85.vcf	ebi-a-GCST90001625	HLA DR+ CD4+ T cell %T cell	id:ebi-a-GCST90001625	85	0.0357966	0.0593643	0.548153	-0.0805574	0.152151	1.03645	0.922602	1.16434
ieu-b-85.vcf	ebi-a-GCST90001625	HLA DR+ CD4+ T cell %T cell	id:ebi-a-GCST90001625	85	-0.0326505	0.046426	0.481882	-0.123645	0.0583445	0.967877	0.883693	1.06008
ieu-b-85.vcf	ebi-a-GCST90001625	HLA DR+ CD4+ T cell %T cell	id:ebi-a-GCST90001625	85	-0.074594	0.0718729	0.302314	-0.215465	0.0662769	0.92812	0.806167	1.06852
ieu-b-85.vcf	ebi-a-GCST90002040	CD80 on granulocyte	id:ebi-a-GCST90002040	87	0.0275728	0.0371633	0.458125	-0.0452672	0.100413	1.02796	0.955742	1.10563
ieu-b-85.vcf	ebi-a-GCST90002040	CD80 on granulocyte	id:ebi-a-GCST90002040	87	0.0247596	0.0751634	0.742655	-0.122561	0.17208	1.02507	0.884652	1.18777
ieu-b-85.vcf	ebi-a-GCST90002040	CD80 on granulocyte	id:ebi-a-GCST90002040	87	0.0272587	0.0571124	0.633162	-0.0846817	0.139199	1.02763	0.918805	1.14935
ieu-b-85.vcf	ebi-a-GCST90002040	CD80 on granulocyte	id:ebi-a-GCST90002040	87	0.0298833	0.0797567	0.70882	-0.12644	0.186206	1.03033	0.881227	1.20467
ieu-b-85.vcf	ebi-a-GCST90001828	IgD on transitional B cell	id:ebi-a-GCST90001828	95	-0.0182497	0.0327051	0.576839	-0.0823518	0.0458524	0.981916	0.920948	1.04692
ieu-b-85.vcf	ebi-a-GCST90001828	IgD on transitional B cell	id:ebi-a-GCST90001828	95	-0.103767	0.0661636	0.1202	-0.233447	0.0259141	0.901436	0.791799	1.02625
ieu-b-85.vcf	ebi-a-GCST90001828	IgD on transitional B cell	id:ebi-a-GCST90001828	95	-0.0635747	0.0541282	0.240187	-0.169666	0.0425166	0.938404	0.843947	1.04343
ieu-b-85.vcf	ebi-a-GCST90001828	IgD on transitional B cell	id:ebi-a-GCST90001828	95	-0.137669	0.0784294	0.0824619	-0.291391	0.0160527	0.871387	0.747224	1.01618
ieu-b-85.vcf	ebi-a-GCST90001988	HLA DR on CD14+ CD16- monocyte	id:ebi-a-GCST90001988	93	0.0172882	0.0328135	0.598289	-0.0470262	0.0816026	1.01744	0.954062	1.08502
ieu-b-85.vcf	ebi-a-GCST90001988	HLA DR on CD14+ CD16- monocyte	id:ebi-a-GCST90001988	93	0.073016	0.065467	0.267654	-0.0552993	0.201331	1.07575	0.946202	1.22303
ieu-b-85.vcf	ebi-a-GCST90001988	HLA DR on CD14+ CD16- monocyte	id:ebi-a-GCST90001988	93	-0.0124975	0.0491688	0.79936	-0.108868	0.0838733	0.98758	0.896849	1.08749
ieu-b-85.vcf	ebi-a-GCST90001988	HLA DR on CD14+ CD16- monocyte	id:ebi-a-GCST90001988	93	-0.0070564	0.063297	0.911478	-0.131119	0.117006	0.992968	0.877114	1.12413
ieu-b-85.vcf	ebi-a-GCST90001558	Terminally Differentiated CD8+ T cell %CD8+ T cell	id:ebi-a-GCST90001558	94	-0.0215225	0.0319922	0.501112	-0.0842272	0.0411822	0.978707	0.919222	1.04204
ieu-b-85.vcf	ebi-a-GCST90001558	Terminally Differentiated CD8+ T cell %CD8+ T cell	id:ebi-a-GCST90001558	94	-0.070851	0.0658508	0.284771	-0.199919	0.0582166	0.931601	0.818797	1.05994
ieu-b-85.vcf	ebi-a-GCST90001558	Terminally Differentiated CD8+ T cell %CD8+ T cell	id:ebi-a-GCST90001558	94	-0.00808127	0.0489303	0.868819	-0.103985	0.0878221	0.991951	0.901239	1.09179
ieu-b-85.vcf	ebi-a-GCST90001558	Terminally Differentiated CD8+ T cell %CD8+ T cell	id:ebi-a-GCST90001558	94	0.00449194	0.0761026	0.953059	-0.144669	0.153653	1.0045	0.865309	1.16609
ieu-b-85.vcf	ebi-a-GCST90001913	CD45 on granulocyte	id:ebi-a-GCST90001913	85	-0.0517081	0.0352807	0.142752	-0.120858	0.0174421	0.949606	0.886159	1.0176
ieu-b-85.vcf	ebi-a-GCST90001913	CD45 on granulocyte	id:ebi-a-GCST90001913	85	-0.09251	0.0720981	0.203024	-0.233822	0.0488023	0.91164	0.791503	1.05001
ieu-b-85.vcf	ebi-a-GCST90001913	CD45 on granulocyte	id:ebi-a-GCST90001913	85	-0.114139	0.0537918	0.0338491	-0.219571	-0.00870701	0.892134	0.802863	0.991331
ieu-b-85.vcf	ebi-a-GCST90001913	CD45 on granulocyte	id:ebi-a-GCST90001913	85	-0.16099	0.0688147	0.0216843	-0.295867	-0.0261137	0.8513	0.743886	0.974224
ieu-b-85.vcf	ebi-a-GCST90001432	Unswitched memory B cell %lymphocyte	id:ebi-a-GCST90001432	94	-0.0133537	0.0321107	0.67751	-0.0762908	0.0495834	0.986735	0.926547	1.05083
ieu-b-85.vcf	ebi-a-GCST90001432	Unswitched memory B cell %lymphocyte	id:ebi-a-GCST90001432	94	-0.0381087	0.0647603	0.557667	-0.165039	0.0888215	0.962608	0.847861	1.09289
ieu-b-85.vcf	ebi-a-GCST90001432	Unswitched memory B cell %lymphocyte	id:ebi-a-GCST90001432	94	-0.0362368	0.0514637	0.481356	-0.137106	0.064632	0.964412	0.871878	1.06677
ieu-b-85.vcf	ebi-a-GCST90001432	Unswitched memory B cell %lymphocyte	id:ebi-a-GCST90001432	94	-0.0553863	0.0646161	0.39356	-0.182034	0.0712612	0.94612	0.833573	1.07386
ieu-b-85.vcf	ebi-a-GCST90002094	CD11b on Monocytic Myeloid-Derived Suppressor Cells	id:ebi-a-GCST90002094	74	0.0520935	0.0513406	0.310266	-0.0485342	0.152721	1.05347	0.952625	1.165
ieu-b-85.vcf	ebi-a-GCST90002094	CD11b on Monocytic Myeloid-Derived Suppressor Cells	id:ebi-a-GCST90002094	74	0.0272531	0.101577	0.789236	-0.171837	0.226344	1.02763	0.842116	1.25401
ieu-b-85.vcf	ebi-a-GCST90002094	CD11b on Monocytic Myeloid-Derived Suppressor Cells	id:ebi-a-GCST90002094	74	0.0775684	0.0753737	0.303424	-0.070164	0.225301	1.08066	0.932241	1.2527
ieu-b-85.vcf	ebi-a-GCST90002094	CD11b on Monocytic Myeloid-Derived Suppressor Cells	id:ebi-a-GCST90002094	74	0.0850914	0.119766	0.47967	-0.14965	0.319833	1.08882	0.861009	1.3769
ieu-b-85.vcf	ebi-a-GCST90001550	Central Memory CD8+ T cell %T cell	id:ebi-a-GCST90001550	90	0.0187761	0.0320141	0.557543	-0.0439716	0.0815239	1.01895	0.956981	1.08494
ieu-b-85.vcf	ebi-a-GCST90001550	Central Memory CD8+ T cell %T cell	id:ebi-a-GCST90001550	90	0.00458866	0.0645472	0.943487	-0.121924	0.131101	1.0046	0.885216	1.14008
ieu-b-85.vcf	ebi-a-GCST90001550	Central Memory CD8+ T cell %T cell	id:ebi-a-GCST90001550	90	0.00916461	0.0493456	0.852662	-0.0875527	0.105882	1.00921	0.916171	1.11169
ieu-b-85.vcf	ebi-a-GCST90001550	Central Memory CD8+ T cell %T cell	id:ebi-a-GCST90001550	90	0.00106164	0.0716046	0.988204	-0.139283	0.141407	1.00106	0.869981	1.15189
ieu-b-85.vcf	ebi-a-GCST90002099	CD4RA on Terminally Differentiated CD4+ T cell	id:ebi-a-GCST90002099	98	0.0197566	0.0352175	0.574805	-0.0492697	0.0887829	1.01995	0.951924	1.09284
ieu-b-85.vcf	ebi-a-GCST90002099	CD4RA on Terminally Differentiated CD4+ T cell	id:ebi-a-GCST90002099	98	-0.0354991	0.0717962	0.622123	-0.17622	0.105221	0.965124	0.838434	1.11096
ieu-b-85.vcf	ebi-a-GCST90002099	CD4RA on Terminally Differentiated CD4+ T cell	id:ebi-a-GCST90002099	98	-0.0045413	0.0520341	0.930453	-0.106528	0.0974455	0.995469	0.89895	1.10235
ieu-b-85.vcf	ebi-a-GCST90002099	CD4RA on Terminally Differentiated CD4+ T cell	id:ebi-a-GCST90002099	98	-0.00386665	0.0683211	0.954984	-0.137776	0.130043	0.996141	0.871294	1.13888
ieu-b-85.vcf	ebi-a-GCST90001407	Memory B cell Absolute Count	id:ebi-a-GCST90001407	94	0.00692872	0.0325323	0.831343	-0.0568346	0.070692	1.00695	0.94475	1.07325
ieu-b-85.vcf	ebi-a-GCST90001407	Memory B cell Absolute Count	id:ebi-a-GCST90001407	94	-0.0134091	0.0668887	0.841556	-0.144511	0.117693	0.98668	0.865445	1.1249
ieu-b-85.vcf	ebi-a-GCST90001407	Memory B cell Absolute Count	id:ebi-a-GCST90001407	94	0.00200342	0.0473283	0.966236	-0.0907601	0.0947669	1.00201	0.913237	1.0994
ieu-b-85.vcf	ebi-a-GCST90001407	Memory B cell Absolute Count	id:ebi-a-GCST90001407	94	0.0193611	0.0656488	0.768713	-0.109311	0.148033	1.01955	0.896452	1.15955
ieu-b-85.vcf	ebi-a-GCST90001454	CD62L- HLA DR++ monocyte Absolute Count	id:ebi-a-GCST90001454	83	-0.0153637	0.0347718	0.658603	-0.0835163	0.052789	0.984754	0.919876	1.05421
ieu-b-85.vcf	ebi-a-GCST90001454	CD62L- HLA DR++ monocyte Absolute Count	id:ebi-a-GCST90001454	83	-0.066272	0.0710608	0.353793	-0.205551	0.0730071	0.935876	0.814198	1.07574
ieu-b-85.vcf	ebi-a-GCST90001454	CD62L- HLA DR++ monocyte Absolute Count	id:ebi-a-GCST90001454	83	-0.0395699	0.0533042	0.457881	-0.144046	0.0649063	0.961203	0.865848	1.06706
ieu-b-85.vcf	ebi-a-GCST90001454	CD62L- HLA DR++ monocyte Absolute Count	id:ebi-a-GCST90001454	83	-0.0539818	0.0874141	0.538589	-0.225313	0.11735	0.947449	0.798266	1.12451
ieu-b-85.vcf	ebi-a-GCST90001825	IgD on IgD+ CD38dim B cell	id:ebi-a-GCST90001825	89	-0.012768	0.03297	0.698563	-0.0773893	0.0518532	0.987313	0.92553	1.05322
ieu-b-85.vcf	ebi-a-GCST90001825	IgD on IgD+ CD38dim B cell	id:ebi-a-GCST90001825	89	-0.141928	0.0670473	0.0371299	-0.27334	-0.0105149	0.867684	0.760834	0.98954
ieu-b-85.vcf	ebi-a-GCST90001825	IgD on IgD+ CD38dim B cell	id:ebi-a-GCST90001825	89	-0.0060888	0.051963	0.906721	-0.107936	0.0957588	0.99393	0.897685	1.10049
ieu-b-85.vcf	ebi-a-GCST90001825	IgD on IgD+ CD38dim B cell	id:ebi-a-GCST90001825	89	-0.0115321	0.0959449	0.904603	-0.199584	0.17652	0.988534	0.819071	1.19306
ieu-b-85.vcf	ebi-a-GCST90001920	CD45 on HLA DR+ CD4+ T cell	id:ebi-a-GCST90001920	88	-0.0606249	0.0358143	0.0905015	-0.130821	0.00957108	0.941176	0.877375	1.00962
ieu-b-85.vcf	ebi-a-GCST90001920	CD45 on HLA DR+ CD4+ T cell	id:ebi-a-GCST90001920	88	-0.054072	0.0723237	0.456717	-0.195826	0.0876824	0.947364	0.822155	1.09164
ieu-b-85.vcf	ebi-a-GCST90001920	CD45 on HLA DR+ CD4+ T cell	id:ebi-a-GCST90001920	88	-0.0582825	0.0524446	0.266433	-0.161074	0.044509	0.943383	0.851229	1.04551
ieu-b-85.vcf	ebi-a-GCST90001920	CD45 on HLA DR+ CD4+ T cell	id:ebi-a-GCST90001920	88	-0.0653541	0.066479	0.328295	-0.195653	0.0649448	0.936736	0.822298	1.0671
ieu-b-85.vcf	ebi-a-GCST90002091	CD11b on CD14+ monocyte	id:ebi-a-GCST90002091	77	0.0612304	0.0513346	0.232959	-0.0393854	0.161846	1.06314	0.96138	1.17568
ieu-b-85.vcf	ebi-a-GCST90002091	CD11b on CD14+ monocyte	id:ebi-a-GCST90002091	77	0.11981	0.108114	0.271325	-0.0920935	0.331713	1.12728	0.91202	1.39335
ieu-b-85.vcf	ebi-a-GCST90002091	CD11b on CD14+ monocyte	id:ebi-a-GCST90002091	77	0.101679	0.0779023	0.191822	-0.0510098	0.254367	1.10703	0.950269	1.28965
ieu-b-85.vcf	ebi-a-GCST90002091	CD11b on CD14+ monocyte	id:ebi-a-GCST90002091	77	-0.137764	0.123527	0.268257	-0.379877	0.10435	0.871304	0.683945	1.10999
ieu-b-85.vcf	ebi-a-GCST90001781	CD25 on IgD+ CD38- naive B cell	id:ebi-a-GCST90001781	73	-0.0176612	0.0478659	0.712148	-0.111478	0.0761559	0.982494	0.894511	1.07913
ieu-b-85.vcf	ebi-a-GCST90001781	CD25 on IgD+ CD38- naive B cell	id:ebi-a-GCST90001781	73	-0.0179949	0.0955348	0.851132	-0.205243	0.169253	0.982166	0.814449	1.18442
ieu-b-85.vcf	ebi-a-GCST90001781	CD25 on IgD+ CD38- naive B cell	id:ebi-a-GCST90001781	73	-0.0184778	0.0713655	0.795699	-0.158354	0.121399	0.981692	0.853547	1.12907
ieu-b-85.vcf	ebi-a-GCST90001781	CD25 on IgD+ CD38- naive B cell	id:ebi-a-GCST90001781	73	-0.0159314	0.0919523	0.862935	-0.196158	0.164295	0.984195	0.821882	1.17856
ieu-b-85.vcf	ebi-a-GCST90001588	T/B cell	id:ebi-a-GCST90001588	97	-0.0117745	0.0326433	0.718321	-0.0757553	0.0522062	0.988295	0.927043	1.05359
ieu-b-85.vcf	ebi-a-GCST90001588	T/B cell	id:ebi-a-GCST90001588	97	0.0256353	0.0667136	0.701645	-0.105123	0.156394	1.02597	0.900213	1.16929
ieu-b-85.vcf	ebi-a-GCST90001588	T/B cell	id:ebi-a-GCST90001588	97	0.0451355	0.0525895	0.390748	-0.0579399	0.148211	1.04617	0.943707	1.15976
ieu-b-85.vcf	ebi-a-GCST90001588	T/B cell	id:ebi-a-GCST90001588	97	0.071357	0.0783448	0.364678	-0.0821988	0.224913	1.07396	0.921089	1.25221
ieu-b-85.vcf	ebi-a-GCST90001688	CD28+ CD45RA+ CD8+ T cell %T cell	id:ebi-a-GCST90001688	94	-0.00324086	0.0226696	0.886321	-0.0476733	0.0411916	0.996764	0.953445	1.04205
ieu-b-85.vcf	ebi-a-GCST90001688	CD28+ CD45RA+ CD8+ T cell %T cell	id:ebi-a-GCST90001688	94	0.0591603	0.0455914	0.197663	-0.030199	0.148519	1.06095	0.970252	1.16012
ieu-b-85.vcf	ebi-a-GCST90001688	CD28+ CD45RA+ CD8+ T cell %T cell	id:ebi-a-GCST90001688	94	-0.00971092	0.03708	0.793406	-0.0823878	0.062966	0.990336	0.920915	1.06499
ieu-b-85.vcf	ebi-a-GCST90001688	CD28+ CD45RA+ CD8+ T cell %T cell	id:ebi-a-GCST90001688	94	-0.0124854	0.0528286	0.81369	-0.11603	0.0910587	0.987592	0.890449	1.09533
ieu-b-85.vcf	ebi-a-GCST90001979	CD16 on CD14- CD16+ monocyte	id:ebi-a-GCST90001979	94	-0.0300381	0.0320701	0.348944	-0.0928954	0.0328193	0.970409	0.911289	1.03336
ieu-b-85.vcf	ebi-a-GCST90001979	CD16 on CD14- CD16+ monocyte	id:ebi-a-GCST90001979	94	-0.0295862	0.0651101	0.65061	-0.157202	0.0980297	0.970847	0.854531	1.103
ieu-b-85.vcf	ebi-a-GCST90001979	CD16 on CD14- CD16+ monocyte	id:ebi-a-GCST90001979	94	0.00572791	0.0484992	0.905986	-0.0893304	0.100786	1.00574	0.914543	1.10604
ieu-b-85.vcf	ebi-a-GCST90001979	CD16 on CD14- CD16+ monocyte	id:ebi-a-GCST90001979	94	0.00671227	0.066404	0.919703	-0.12344	0.136864	1.00673	0.883875	1.14667
ieu-b-85.vcf	ebi-a-GCST90002108	HLA DR on CD33+ HLA DR+ CD14-	id:ebi-a-GCST90002108	72	0.0330029	0.0515734	0.522225	-0.0680811	0.134087	1.03355	0.934185	1.14349
ieu-b-85.vcf	ebi-a-GCST90002108	HLA DR on CD33+ HLA DR+ CD14-	id:ebi-a-GCST90002108	72	0.0220566	0.100064	0.826181	-0.174068	0.218182	1.0223	0.840239	1.24381
ieu-b-85.vcf	ebi-a-GCST90002108	HLA DR on CD33+ HLA DR+ CD14-	id:ebi-a-GCST90002108	72	0.0509244	0.0741349	0.492136	-0.0943801	0.196229	1.05224	0.909937	1.21681
ieu-b-85.vcf	ebi-a-GCST90002108	HLA DR on CD33+ HLA DR+ CD14-	id:ebi-a-GCST90002108	72	-0.0765527	0.0877164	0.385752	-0.248477	0.0953714	0.926304	0.779988	1.10007
ieu-b-85.vcf	ebi-a-GCST90001518	CD33+ HLA DR+ CD14- Absolute Count	id:ebi-a-GCST90001518	78	0.0311779	0.0447728	0.486205	-0.0565769	0.118933	1.03167	0.944994	1.12629
ieu-b-85.vcf	ebi-a-GCST90001518	CD33+ HLA DR+ CD14- Absolute Count	id:ebi-a-GCST90001518	78	-0.00426802	0.0895292	0.962103	-0.179745	0.171209	0.995741	0.835483	1.18674
ieu-b-85.vcf	ebi-a-GCST90001518	CD33+ HLA DR+ CD14- Absolute Count	id:ebi-a-GCST90001518	78	0.0522838	0.0682532	0.44366	-0.0814924	0.18606	1.05367	0.92174	1.20449
ieu-b-85.vcf	ebi-a-GCST90001518	CD33+ HLA DR+ CD14- Absolute Count	id:ebi-a-GCST90001518	78	0.10503	0.110863	0.346406	-0.112261	0.322321	1.11074	0.893811	1.38033
ieu-b-85.vcf	ebi-a-GCST90002092	CD11b on Granulocytic Myeloid-Derived Suppressor Cells	id:ebi-a-GCST90002092	13	0.0159456	0.127631	0.900575	-0.234211	0.266102	1.01607	0.791195	1.30487
ieu-b-85.vcf	ebi-a-GCST90002092	CD11b on Granulocytic Myeloid-Derived Suppressor Cells	id:ebi-a-GCST90002092	13	-0.0347838	0.355588	0.923834	-0.731736	0.662168	0.965814	0.481073	1.93899
ieu-b-85.vcf	ebi-a-GCST90002092	CD11b on Granulocytic Myeloid-Derived Suppressor Cells	id:ebi-a-GCST90002092	13	0.0460373	0.16562	0.781035	-0.278577	0.370652	1.04711	0.75686	1.44868
ieu-b-85.vcf	ebi-a-GCST90002092	CD11b on Granulocytic Myeloid-Derived Suppressor Cells	id:ebi-a-GCST90002092	13	0.201919	0.217685	0.371908	-0.224743	0.628581	1.22375	0.798722	1.87495
ieu-b-85.vcf	ebi-a-GCST90002098	CD45RA on naive CD4+ T cell	id:ebi-a-GCST90002098	96	-0.0342103	0.0336266	0.308983	-0.100118	0.0316978	0.966368	0.90473	1.03221
ieu-b-85.vcf	ebi-a-GCST90002098	CD45RA on naive CD4+ T cell	id:ebi-a-GCST90002098	96	-0.0429226	0.0686378	0.533257	-0.177453	0.0916075	0.957986	0.837401	1.09593
ieu-b-85.vcf	ebi-a-GCST90002098	CD45RA on naive CD4+ T cell	id:ebi-a-GCST90002098	96	-0.0233394	0.0487445	0.632073	-0.118879	0.0721998	0.976931	0.887916	1.07487
ieu-b-85.vcf	ebi-a-GCST90002098	CD45RA on naive CD4+ T cell	id:ebi-a-GCST90002098	96	0.00693963	0.0747635	0.926241	-0.139597	0.153476	1.00696	0.869709	1.16588
ieu-b-85.vcf	ebi-a-GCST90001408	Naive-mature B cell %B cell	id:ebi-a-GCST90001408	85	0.00616759	0.0331972	0.852612	-0.0588989	0.0712341	1.00619	0.942802	1.07383
ieu-b-85.vcf	ebi-a-GCST90001408	Naive-mature B cell %B cell	id:ebi-a-GCST90001408	85	-0.0275225	0.0675816	0.684874	-0.159982	0.104937	0.972853	0.852159	1.11064
ieu-b-85.vcf	ebi-a-GCST90001408	Naive-mature B cell %B cell	id:ebi-a-GCST90001408	85	0.0233525	0.0486173	0.63099	-0.0719373	0.118642	1.02363	0.930589	1.12597
ieu-b-85.vcf	ebi-a-GCST90001408	Naive-mature B cell %B cell	id:ebi-a-GCST90001408	85	0.00931681	0.0708626	0.895712	-0.129574	0.148208	1.00936	0.87847	1.15975
ieu-b-85.vcf	ebi-a-GCST90001648	HLA DR+ Natural Killer Absolute Count	id:ebi-a-GCST90001648	89	-0.0433043	0.032833	0.187195	-0.107657	0.0210485	0.95762	0.897936	1.02127
ieu-b-85.vcf	ebi-a-GCST90001648	HLA DR+ Natural Killer Absolute Count	id:ebi-a-GCST90001648	89	-0.135787	0.0652046	0.0402361	-0.263588	-0.00798551	0.873029	0.76829	0.992046
ieu-b-85.vcf	ebi-a-GCST90001648	HLA DR+ Natural Killer Absolute Count	id:ebi-a-GCST90001648	89	-0.0650556	0.0476238	0.171929	-0.158398	0.028287	0.937015	0.85351	1.02869
ieu-b-85.vcf	ebi-a-GCST90001648	HLA DR+ Natural Killer Absolute Count	id:ebi-a-GCST90001648	89	-0.0855453	0.0623172	0.173321	-0.207687	0.0365964	0.918012	0.812461	1.03727
ieu-b-85.vcf	ebi-a-GCST90001925	CD127 on CD28+ CD4-CD8- T cell	id:ebi-a-GCST90001925	83	-0.0036291	0.0355795	0.918757	-0.073365	0.0661068	0.996377	0.929262	1.06834
ieu-b-85.vcf	ebi-a-GCST90001925	CD127 on CD28+ CD4-CD8- T cell	id:ebi-a-GCST90001925	83	0.0093161	0.0710218	0.895964	-0.129887	0.148519	1.00936	0.878195	1.16011
ieu-b-85.vcf	ebi-a-GCST90001925	CD127 on CD28+ CD4-CD8- T cell	id:ebi-a-GCST90001925	83	0.00323243	0.0537514	0.952047	-0.10212	0.108585	1.00324	0.902921	1.1147
ieu-b-85.vcf	ebi-a-GCST90001925	CD127 on CD28+ CD4-CD8- T cell	id:ebi-a-GCST90001925	83	0.0362462	0.0741099	0.626086	-0.109009	0.181502	1.03691	0.896722	1.19902
ieu-b-85.vcf	ebi-a-GCST90001798	CD27 on CD24+ CD27+ B cell	id:ebi-a-GCST90001798	93	0.0162924	0.0323468	0.614488	-0.0471074	0.0796922	1.01643	0.953985	1.08295
ieu-b-85.vcf	ebi-a-GCST90001798	CD27 on CD24+ CD27+ B cell	id:ebi-a-GCST90001798	93	0.0474792	0.0651185	0.467801	-0.0801531	0.175112	1.04862	0.922975	1.19138
ieu-b-85.vcf	ebi-a-GCST90001798	CD27 on CD24+ CD27+ B cell	id:ebi-a-GCST90001798	93	0.0141269	0.0483722	0.770251	-0.0806825	0.108936	1.01423	0.922487	1.11509
ieu-b-85.vcf	ebi-a-GCST90001798	CD27 on CD24+ CD27+ B cell	id:ebi-a-GCST90001798	93	0.0368161	0.0658918	0.5777	-0.0923319	0.165964	1.0375	0.911802	1.18053
ieu-b-85.vcf	ebi-a-GCST90001673	CD28- CD127- CD25++ CD8+ T cell %T cell	id:ebi-a-GCST90001673	92	-0.071353	0.0326659	0.028938	-0.135378	-0.00732792	0.931133	0.873386	0.992699
ieu-b-85.vcf	ebi-a-GCST90001673	CD28- CD127- CD25++ CD8+ T cell %T cell	id:ebi-a-GCST90001673	92	-0.0871145	0.0673311	0.199037	-0.219084	0.0448545	0.916572	0.803255	1.04588
ieu-b-85.vcf	ebi-a-GCST90001673	CD28- CD127- CD25++ CD8+ T cell %T cell	id:ebi-a-GCST90001673	92	-0.10247	0.0487061	0.0353927	-0.197934	-0.00700571	0.902606	0.820424	0.993019
ieu-b-85.vcf	ebi-a-GCST90001673	CD28- CD127- CD25++ CD8+ T cell %T cell	id:ebi-a-GCST90001673	92	-0.11952	0.082081	0.148799	-0.280399	0.0413584	0.887346	0.755482	1.04223
ieu-b-85.vcf	ebi-a-GCST90001984	HLA DR on CD14- CD16+ monocyte	id:ebi-a-GCST90001984	94	0.0244277	0.0322474	0.448745	-0.0387772	0.0876326	1.02473	0.961965	1.09159
ieu-b-85.vcf	ebi-a-GCST90001984	HLA DR on CD14- CD16+ monocyte	id:ebi-a-GCST90001984	94	0.0306591	0.0655285	0.640982	-0.0977769	0.159095	1.03113	0.906851	1.17245
ieu-b-85.vcf	ebi-a-GCST90001984	HLA DR on CD14- CD16+ monocyte	id:ebi-a-GCST90001984	94	0.0333797	0.0477422	0.484449	-0.060195	0.126954	1.03394	0.941581	1.13537
ieu-b-85.vcf	ebi-a-GCST90001984	HLA DR on CD14- CD16+ monocyte	id:ebi-a-GCST90001984	94	0.0123365	0.0647285	0.849263	-0.114531	0.139204	1.01241	0.891784	1.14936
ieu-b-85.vcf	ebi-a-GCST90001751	CD20 on IgD+ CD38+ B cell	id:ebi-a-GCST90001751	84	0.0109954	0.032413	0.734439	-0.0525342	0.0745249	1.01106	0.948822	1.07737
ieu-b-85.vcf	ebi-a-GCST90001751	CD20 on IgD+ CD38+ B cell	id:ebi-a-GCST90001751	84	0.0474065	0.0666165	0.478712	-0.0831618	0.177975	1.04855	0.920202	1.1948
ieu-b-85.vcf	ebi-a-GCST90001751	CD20 on IgD+ CD38+ B cell	id:ebi-a-GCST90001751	84	0.0144728	0.0473344	0.75979	-0.0783027	0.107248	1.01458	0.924684	1.11321
ieu-b-85.vcf	ebi-a-GCST90001751	CD20 on IgD+ CD38+ B cell	id:ebi-a-GCST90001751	84	0.00885661	0.0706267	0.90051	-0.129572	0.147285	1.0089	0.878472	1.15868
ieu-b-85.vcf	ebi-a-GCST90001508	CD25++ CD45RA+ CD4 not regulatory T cell %CD4+ T cell	id:ebi-a-GCST90001508	85	-0.0155405	0.034281	0.650314	-0.0827312	0.0516503	0.98458	0.920599	1.05301
ieu-b-85.vcf	ebi-a-GCST90001508	CD25++ CD45RA+ CD4 not regulatory T cell %CD4+ T cell	id:ebi-a-GCST90001508	85	-0.026704	0.0679137	0.695176	-0.159815	0.106407	0.973649	0.852301	1.11227
ieu-b-85.vcf	ebi-a-GCST90001508	CD25++ CD45RA+ CD4 not regulatory T cell %CD4+ T cell	id:ebi-a-GCST90001508	85	-0.0292496	0.0495233	0.554773	-0.126315	0.0678161	0.971174	0.881337	1.07017
ieu-b-85.vcf	ebi-a-GCST90001508	CD25++ CD45RA+ CD4 not regulatory T cell %CD4+ T cell	id:ebi-a-GCST90001508	85	-0.0349428	0.0701129	0.619519	-0.172364	0.102478	0.965661	0.841673	1.10791
ieu-b-85.vcf	ebi-a-GCST90001933	CD25 on CD45RA- CD4 not regulatory T cell	id:ebi-a-GCST90001933	86	0.0186056	0.0341229	0.585579	-0.0482752	0.0854864	1.01878	0.952872	1.08925
ieu-b-85.vcf	ebi-a-GCST90001933	CD25 on CD45RA- CD4 not regulatory T cell	id:ebi-a-GCST90001933	86	0.000745951	0.0686668	0.991358	-0.133841	0.135333	1.00075	0.874729	1.14492
ieu-b-85.vcf	ebi-a-GCST90001933	CD25 on CD45RA- CD4 not regulatory T cell	id:ebi-a-GCST90001933	86	0.0056671	0.0508945	0.911339	-0.0940862	0.10542	1.00568	0.910204	1.11118
ieu-b-85.vcf	ebi-a-GCST90001933	CD25 on CD45RA- CD4 not regulatory T cell	id:ebi-a-GCST90001933	86	0.00568059	0.0602516	0.925108	-0.112413	0.123774	1.0057	0.893675	1.13176
ieu-b-85.vcf	ebi-a-GCST90001520	CD33+ HLA DR+ CD14dim Absolute Count	id:ebi-a-GCST90001520	75	0.0502067	0.0461289	0.276419	-0.040206	0.140619	1.05149	0.960592	1.15099
ieu-b-85.vcf	ebi-a-GCST90001520	CD33+ HLA DR+ CD14dim Absolute Count	id:ebi-a-GCST90001520	75	0.0644489	0.0937014	0.493751	-0.119206	0.248104	1.06657	0.887625	1.28159
ieu-b-85.vcf	ebi-a-GCST90001520	CD33+ HLA DR+ CD14dim Absolute Count	id:ebi-a-GCST90001520	75	0.124429	0.0700261	0.0755844	-0.0128216	0.261681	1.1325	0.98726	1.29911
ieu-b-85.vcf	ebi-a-GCST90001520	CD33+ HLA DR+ CD14dim Absolute Count	id:ebi-a-GCST90001520	75	0.1842	0.105643	0.0853805	-0.0228603	0.39126	1.20226	0.977399	1.47884
ieu-b-85.vcf	ebi-a-GCST90001918	CD45 on HLA DR+ T cell	id:ebi-a-GCST90001918	92	-0.0178297	0.0357609	0.618075	-0.0879211	0.0522617	0.982328	0.915833	1.05365
ieu-b-85.vcf	ebi-a-GCST90001918	CD45 on HLA DR+ T cell	id:ebi-a-GCST90001918	92	-0.0806703	0.0730102	0.27214	-0.22377	0.0624296	0.922498	0.799499	1.06442
ieu-b-85.vcf	ebi-a-GCST90001918	CD45 on HLA DR+ T cell	id:ebi-a-GCST90001918	92	-0.0343536	0.0542518	0.526586	-0.140687	0.0719798	0.96623	0.868761	1.07463
ieu-b-85.vcf	ebi-a-GCST90001918	CD45 on HLA DR+ T cell	id:ebi-a-GCST90001918	92	-0.0743308	0.0767478	0.335358	-0.224756	0.0760948	0.928365	0.798711	1.07906
ieu-b-85.vcf	ebi-a-GCST90001863	CD3 on CD28+ CD45RA- CD8+ T cell	id:ebi-a-GCST90001863	82	0.00314998	0.0360377	0.930347	-0.0674839	0.0737839	1.00315	0.934743	1.07657
ieu-b-85.vcf	ebi-a-GCST90001863	CD3 on CD28+ CD45RA- CD8+ T cell	id:ebi-a-GCST90001863	82	0.0463161	0.0730594	0.527921	-0.0968803	0.189512	1.04741	0.907665	1.20866
ieu-b-85.vcf	ebi-a-GCST90001863	CD3 on CD28+ CD45RA- CD8+ T cell	id:ebi-a-GCST90001863	82	0.0158344	0.0546303	0.771933	-0.091241	0.12291	1.01596	0.912798	1.13078
ieu-b-85.vcf	ebi-a-GCST90001863	CD3 on CD28+ CD45RA- CD8+ T cell	id:ebi-a-GCST90001863	82	-0.000219218	0.0880605	0.99802	-0.172818	0.172379	0.999781	0.841291	1.18813
ieu-b-85.vcf	ebi-a-GCST90001670	CD39+ CD8+ T cell %T cell	id:ebi-a-GCST90001670	88	0.00303269	0.0336974	0.928289	-0.0630141	0.0690795	1.00304	0.93893	1.07152
ieu-b-85.vcf	ebi-a-GCST90001670	CD39+ CD8+ T cell %T cell	id:ebi-a-GCST90001670	88	-0.0285755	0.0660637	0.666428	-0.15806	0.100909	0.971829	0.853798	1.10618
ieu-b-85.vcf	ebi-a-GCST90001670	CD39+ CD8+ T cell %T cell	id:ebi-a-GCST90001670	88	0.0443265	0.0521132	0.395002	-0.0578153	0.146468	1.04532	0.943824	1.15774
ieu-b-85.vcf	ebi-a-GCST90001670	CD39+ CD8+ T cell %T cell	id:ebi-a-GCST90001670	88	0.127392	0.0930124	0.174328	-0.0549118	0.309697	1.13586	0.946569	1.36301
ieu-b-85.vcf	ebi-a-GCST90001501	Activated & secreting CD4 regulatory T cell Absolute Count	id:ebi-a-GCST90001501	96	0.0215641	0.0342555	0.529017	-0.0455767	0.0887049	1.0218	0.955446	1.09276
ieu-b-85.vcf	ebi-a-GCST90001501	Activated & secreting CD4 regulatory T cell Absolute Count	id:ebi-a-GCST90001501	96	0.0396901	0.068355	0.562868	-0.0942857	0.173666	1.04049	0.910023	1.18966
ieu-b-85.vcf	ebi-a-GCST90001501	Activated & secreting CD4 regulatory T cell Absolute Count	id:ebi-a-GCST90001501	96	0.041703	0.0520764	0.423245	-0.0603668	0.143773	1.04258	0.941419	1.15462
ieu-b-85.vcf	ebi-a-GCST90001501	Activated & secreting CD4 regulatory T cell Absolute Count	id:ebi-a-GCST90001501	96	0.101771	0.0843663	0.230699	-0.0635873	0.267129	1.10713	0.938392	1.30621
ieu-b-85.vcf	ebi-a-GCST90001804	CD27 on IgD- CD38dim B cell	id:ebi-a-GCST90001804	92	-0.0043643	0.0321698	0.892086	-0.067417	0.0586884	0.995645	0.934805	1.06044
ieu-b-85.vcf	ebi-a-GCST90001804	CD27 on IgD- CD38dim B cell	id:ebi-a-GCST90001804	92	0.0220013	0.0647172	0.734678	-0.104844	0.148847	1.02225	0.900465	1.1605
ieu-b-85.vcf	ebi-a-GCST90001804	CD27 on IgD- CD38dim B cell	id:ebi-a-GCST90001804	92	-0.0155691	0.0480652	0.746001	-0.109777	0.0786387	0.984551	0.896034	1.08181
ieu-b-85.vcf	ebi-a-GCST90001804	CD27 on IgD- CD38dim B cell	id:ebi-a-GCST90001804	92	-0.0873666	0.0662018	0.190246	-0.217122	0.042389	0.916341	0.804832	1.0433
ieu-b-85.vcf	ebi-a-GCST90001772	CD24 on unswitched memory B cell	id:ebi-a-GCST90001772	90	0.026101	0.0322952	0.418976	-0.0371977	0.0893997	1.02644	0.963486	1.09352
ieu-b-85.vcf	ebi-a-GCST90001772	CD24 on unswitched memory B cell	id:ebi-a-GCST90001772	90	0.0303457	0.0655364	0.644481	-0.0981056	0.158797	1.03081	0.906553	1.1721
ieu-b-85.vcf	ebi-a-GCST90001772	CD24 on unswitched memory B cell	id:ebi-a-GCST90001772	90	0.0082432	0.0525237	0.87529	-0.0947033	0.11119	1.00828	0.909643	1.11761
ieu-b-85.vcf	ebi-a-GCST90001772	CD24 on unswitched memory B cell	id:ebi-a-GCST90001772	90	0.0506829	0.0700258	0.471102	-0.0865676	0.187933	1.05199	0.917074	1.20675
ieu-b-85.vcf	ebi-a-GCST90002119	CD8 on CD28+ CD45RA+ CD8+ T cell	id:ebi-a-GCST90002119	78	-0.0266201	0.0359486	0.458993	-0.0970794	0.0438391	0.973731	0.907484	1.04481
ieu-b-85.vcf	ebi-a-GCST90002119	CD8 on CD28+ CD45RA+ CD8+ T cell	id:ebi-a-GCST90002119	78	-0.0173519	0.0730144	0.812792	-0.16046	0.125756	0.982798	0.851752	1.13401
ieu-b-85.vcf	ebi-a-GCST90002119	CD8 on CD28+ CD45RA+ CD8+ T cell	id:ebi-a-GCST90002119	78	-0.0551543	0.0542515	0.309324	-0.161487	0.0511787	0.946339	0.850877	1.05251
ieu-b-85.vcf	ebi-a-GCST90002119	CD8 on CD28+ CD45RA+ CD8+ T cell	id:ebi-a-GCST90002119	78	-0.045916	0.0738188	0.535773	-0.190601	0.0987688	0.955122	0.826462	1.10381
ieu-b-85.vcf	ebi-a-GCST90001883	CD16-CD56 on Natural Killer T	id:ebi-a-GCST90001883	87	0.00718325	0.0361422	0.842458	-0.0636554	0.0780219	1.00721	0.938328	1.08115
ieu-b-85.vcf	ebi-a-GCST90001883	CD16-CD56 on Natural Killer T	id:ebi-a-GCST90001883	87	-0.0222766	0.0728109	0.76039	-0.164986	0.120433	0.97797	0.847906	1.12799
ieu-b-85.vcf	ebi-a-GCST90001883	CD16-CD56 on Natural Killer T	id:ebi-a-GCST90001883	87	0.0202173	0.0506891	0.690005	-0.0791333	0.119568	1.02042	0.923917	1.12701
ieu-b-85.vcf	ebi-a-GCST90001883	CD16-CD56 on Natural Killer T	id:ebi-a-GCST90001883	87	0.0293311	0.0714645	0.682512	-0.110739	0.169401	1.02977	0.895172	1.1846
ieu-b-85.vcf	ebi-a-GCST90001849	CD3 on HLA DR+ CD4+ T cell	id:ebi-a-GCST90001849	98	0.0211927	0.0345162	0.53922	-0.046459	0.0888443	1.02142	0.954604	1.09291
ieu-b-85.vcf	ebi-a-GCST90001849	CD3 on HLA DR+ CD4+ T cell	id:ebi-a-GCST90001849	98	0.020302	0.0700684	0.772635	-0.117032	0.157636	1.02051	0.889557	1.17074
ieu-b-85.vcf	ebi-a-GCST90001849	CD3 on HLA DR+ CD4+ T cell	id:ebi-a-GCST90001849	98	0.00623741	0.0531479	0.906575	-0.0979326	0.110407	1.00626	0.90671	1.11673
ieu-b-85.vcf	ebi-a-GCST90001849	CD3 on HLA DR+ CD4+ T cell	id:ebi-a-GCST90001849	98	-0.00916116	0.0677768	0.89276	-0.142004	0.123681	0.990881	0.867618	1.13166
ieu-b-85.vcf	ebi-a-GCST90001630	CD8+ Natural Killer T Absolute Count	id:ebi-a-GCST90001630	94	-0.0169808	0.0329496	0.606305	-0.081562	0.0476005	0.983163	0.921676	1.04875
ieu-b-85.vcf	ebi-a-GCST90001630	CD8+ Natural Killer T Absolute Count	id:ebi-a-GCST90001630	94	-0.131357	0.0668667	0.0524938	-0.262416	-0.000298579	0.876904	0.769191	0.999701
ieu-b-85.vcf	ebi-a-GCST90001630	CD8+ Natural Killer T Absolute Count	id:ebi-a-GCST90001630	94	-0.0595895	0.0489237	0.223221	-0.15548	0.036301	0.942151	0.856004	1.03697
ieu-b-85.vcf	ebi-a-GCST90001630	CD8+ Natural Killer T Absolute Count	id:ebi-a-GCST90001630	94	-0.111493	0.0631407	0.0807122	-0.235249	0.0122623	0.894497	0.790374	1.01234
ieu-b-85.vcf	ebi-a-GCST90001899	CD28 on CD4 regulatory T cell	id:ebi-a-GCST90001899	100	0.0269918	0.0330463	0.414049	-0.0377789	0.0917626	1.02736	0.962926	1.0961
ieu-b-85.vcf	ebi-a-GCST90001899	CD28 on CD4 regulatory T cell	id:ebi-a-GCST90001899	100	0.0205747	0.0669914	0.7594	-0.110728	0.151878	1.02079	0.895182	1.16402
ieu-b-85.vcf	ebi-a-GCST90001899	CD28 on CD4 regulatory T cell	id:ebi-a-GCST90001899	100	0.0742974	0.0520009	0.15307	-0.0276243	0.176219	1.07713	0.972754	1.1927
ieu-b-85.vcf	ebi-a-GCST90001899	CD28 on CD4 regulatory T cell	id:ebi-a-GCST90001899	100	0.110811	0.0745044	0.140111	-0.0352175	0.25684	1.11718	0.965395	1.29284
ieu-b-85.vcf	ebi-a-GCST90002073	SSC-A on monocyte	id:ebi-a-GCST90002073	77	0.027225	0.0380583	0.474393	-0.0473693	0.101819	1.0276	0.953735	1.10718
ieu-b-85.vcf	ebi-a-GCST90002073	SSC-A on monocyte	id:ebi-a-GCST90002073	77	-0.00135462	0.0751224	0.985661	-0.148594	0.145885	0.998646	0.861919	1.15706
ieu-b-85.vcf	ebi-a-GCST90002073	SSC-A on monocyte	id:ebi-a-GCST90002073	77	0.0174577	0.0576134	0.761878	-0.0954645	0.13038	1.01761	0.908951	1.13926
ieu-b-85.vcf	ebi-a-GCST90002073	SSC-A on monocyte	id:ebi-a-GCST90002073	77	0.14071	0.0821388	0.090775	-0.0202819	0.301702	1.15109	0.979922	1.35216
ieu-b-85.vcf	ebi-a-GCST90001733	CD19 on IgD- CD38- B cell	id:ebi-a-GCST90001733	91	-0.00497427	0.0322983	0.877602	-0.0682788	0.0583303	0.995038	0.934	1.06007
ieu-b-85.vcf	ebi-a-GCST90001733	CD19 on IgD- CD38- B cell	id:ebi-a-GCST90001733	91	0.00758816	0.0651996	0.907611	-0.120203	0.135379	1.00762	0.88674	1.14497
ieu-b-85.vcf	ebi-a-GCST90001733	CD19 on IgD- CD38- B cell	id:ebi-a-GCST90001733	91	-0.0245538	0.0490196	0.616444	-0.120632	0.0715247	0.975745	0.88636	1.07414
ieu-b-85.vcf	ebi-a-GCST90001733	CD19 on IgD- CD38- B cell	id:ebi-a-GCST90001733	91	-0.0333223	0.0663164	0.616561	-0.163302	0.0966579	0.967227	0.849334	1.10148
ieu-b-85.vcf	ebi-a-GCST90001526	CD33dim HLA DR+ CD11b+ %CD33dim HLA DR+	id:ebi-a-GCST90001526	84	-0.0345748	0.0456351	0.44867	-0.12402	0.0548701	0.966016	0.883362	1.0564
ieu-b-85.vcf	ebi-a-GCST90001526	CD33dim HLA DR+ CD11b+ %CD33dim HLA DR+	id:ebi-a-GCST90001526	84	-0.0806402	0.0905808	0.375933	-0.258179	0.0968982	0.922526	0.772457	1.10175
ieu-b-85.vcf	ebi-a-GCST90001526	CD33dim HLA DR+ CD11b+ %CD33dim HLA DR+	id:ebi-a-GCST90001526	84	-0.0794196	0.0657994	0.227434	-0.208386	0.0495473	0.923652	0.811893	1.0508
ieu-b-85.vcf	ebi-a-GCST90001526	CD33dim HLA DR+ CD11b+ %CD33dim HLA DR+	id:ebi-a-GCST90001526	84	-0.0850582	0.0887588	0.340691	-0.259025	0.0889091	0.918459	0.771803	1.09298
ieu-b-85.vcf	ebi-a-GCST90001710	BAFF-R on IgD- CD24- B cell	id:ebi-a-GCST90001710	96	-0.0176594	0.0325723	0.587707	-0.0815012	0.0461823	0.982496	0.921732	1.04727
ieu-b-85.vcf	ebi-a-GCST90001710	BAFF-R on IgD- CD24- B cell	id:ebi-a-GCST90001710	96	-0.0249283	0.0656584	0.705049	-0.153619	0.103762	0.97538	0.857599	1.10934
ieu-b-85.vcf	ebi-a-GCST90001710	BAFF-R on IgD- CD24- B cell	id:ebi-a-GCST90001710	96	-0.0502676	0.0492351	0.307268	-0.146768	0.0462332	0.950975	0.863494	1.04732
ieu-b-85.vcf	ebi-a-GCST90001710	BAFF-R on IgD- CD24- B cell	id:ebi-a-GCST90001710	96	-0.0367721	0.0678194	0.588946	-0.169698	0.0961539	0.963896	0.843919	1.10093
ieu-b-85.vcf	ebi-a-GCST90001757	CD20 on IgD- CD38dim B cell	id:ebi-a-GCST90001757	96	-0.0149308	0.0321001	0.641837	-0.0778469	0.0479854	0.98518	0.925106	1.04916
ieu-b-85.vcf	ebi-a-GCST90001757	CD20 on IgD- CD38dim B cell	id:ebi-a-GCST90001757	96	-0.0091305	0.064692	0.888063	-0.135927	0.117666	0.990911	0.872906	1.12487
ieu-b-85.vcf	ebi-a-GCST90001757	CD20 on IgD- CD38dim B cell	id:ebi-a-GCST90001757	96	-0.0449257	0.0481911	0.351213	-0.13938	0.049529	0.956069	0.869897	1.05078
ieu-b-85.vcf	ebi-a-GCST90001757	CD20 on IgD- CD38dim B cell	id:ebi-a-GCST90001757	96	-0.0279464	0.0680322	0.682157	-0.161289	0.105397	0.97244	0.851046	1.11115
ieu-b-85.vcf	ebi-a-GCST90001714	BAFF-R on IgD- CD38dim B cell	id:ebi-a-GCST90001714	21	-0.0196987	0.0720889	0.784656	-0.160993	0.121596	0.980494	0.851298	1.1293
ieu-b-85.vcf	ebi-a-GCST90001714	BAFF-R on IgD- CD38dim B cell	id:ebi-a-GCST90001714	21	0.0841769	0.164298	0.614316	-0.237848	0.406201	1.08782	0.788323	1.5011
ieu-b-85.vcf	ebi-a-GCST90001714	BAFF-R on IgD- CD38dim B cell	id:ebi-a-GCST90001714	21	-0.0832317	0.107989	0.44086	-0.29489	0.128427	0.920138	0.744613	1.13704
ieu-b-85.vcf	ebi-a-GCST90001714	BAFF-R on IgD- CD38dim B cell	id:ebi-a-GCST90001714	21	-0.171752	0.197788	0.395496	-0.559416	0.215912	0.842188	0.571543	1.24099
ieu-b-85.vcf	ebi-a-GCST90001773	CD24 on switched memory B cell	id:ebi-a-GCST90001773	91	-0.0300029	0.0328538	0.361124	-0.0943962	0.0343905	0.970443	0.909922	1.03499
ieu-b-85.vcf	ebi-a-GCST90001773	CD24 on switched memory B cell	id:ebi-a-GCST90001773	91	-0.0642481	0.0672614	0.342064	-0.196081	0.0675843	0.937772	0.821946	1.06992
ieu-b-85.vcf	ebi-a-GCST90001773	CD24 on switched memory B cell	id:ebi-a-GCST90001773	91	-0.0471692	0.0476368	0.322083	-0.140537	0.0461988	0.953926	0.868891	1.04728
ieu-b-85.vcf	ebi-a-GCST90001773	CD24 on switched memory B cell	id:ebi-a-GCST90001773	91	-0.0754361	0.0606086	0.216494	-0.194229	0.0433567	0.927339	0.823469	1.04431
ieu-b-85.vcf	ebi-a-GCST90001540	Naive CD4+ T cell Absolute Count	id:ebi-a-GCST90001540	92	-0.0170179	0.0311268	0.584565	-0.0780265	0.0439907	0.983126	0.92494	1.04497
ieu-b-85.vcf	ebi-a-GCST90001540	Naive CD4+ T cell Absolute Count	id:ebi-a-GCST90001540	92	0.0106187	0.0620663	0.86454	-0.111031	0.132269	1.01068	0.894911	1.14141
ieu-b-85.vcf	ebi-a-GCST90001540	Naive CD4+ T cell Absolute Count	id:ebi-a-GCST90001540	92	-0.0166668	0.0442426	0.706386	-0.103382	0.0700486	0.983471	0.901782	1.07256
ieu-b-85.vcf	ebi-a-GCST90001540	Naive CD4+ T cell Absolute Count	id:ebi-a-GCST90001540	92	-0.0443466	0.0607695	0.467417	-0.163455	0.0747616	0.956622	0.849205	1.07763
ieu-b-85.vcf	ebi-a-GCST90002084	SSC-A on Natural Killer T	id:ebi-a-GCST90002084	87	0.0254737	0.0362474	0.482198	-0.0455713	0.0965186	1.0258	0.955451	1.10133
ieu-b-85.vcf	ebi-a-GCST90002084	SSC-A on Natural Killer T	id:ebi-a-GCST90002084	87	0.0213247	0.0725571	0.769549	-0.120887	0.163537	1.02155	0.886134	1.17767
ieu-b-85.vcf	ebi-a-GCST90002084	SSC-A on Natural Killer T	id:ebi-a-GCST90002084	87	0.0121569	0.0537972	0.82122	-0.0932856	0.117599	1.01223	0.910933	1.12479
ieu-b-85.vcf	ebi-a-GCST90002084	SSC-A on Natural Killer T	id:ebi-a-GCST90002084	87	0.00249903	0.0723074	0.97251	-0.139223	0.144221	1.0025	0.870034	1.15514
ieu-b-85.vcf	ebi-a-GCST90001754	CD20 on IgD- CD27- B cell	id:ebi-a-GCST90001754	79	-0.00757595	0.0337322	0.822298	-0.0736911	0.0585392	0.992453	0.928959	1.06029
ieu-b-85.vcf	ebi-a-GCST90001754	CD20 on IgD- CD27- B cell	id:ebi-a-GCST90001754	79	-0.032992	0.0673415	0.625583	-0.164981	0.0989974	0.967546	0.84791	1.10406
ieu-b-85.vcf	ebi-a-GCST90001754	CD20 on IgD- CD27- B cell	id:ebi-a-GCST90001754	79	-0.0588582	0.0529133	0.265986	-0.162568	0.0448518	0.94284	0.849958	1.04587
ieu-b-85.vcf	ebi-a-GCST90001754	CD20 on IgD- CD27- B cell	id:ebi-a-GCST90001754	79	-0.0791829	0.0748305	0.293247	-0.225851	0.0674849	0.923871	0.797837	1.06981
ieu-b-85.vcf	ebi-a-GCST90001956	CD33 on CD33+ HLA DR+	id:ebi-a-GCST90001956	75	-0.0212829	0.0506295	0.674218	-0.120517	0.0779509	0.978942	0.886462	1.08107
ieu-b-85.vcf	ebi-a-GCST90001956	CD33 on CD33+ HLA DR+	id:ebi-a-GCST90001956	75	-0.162038	0.103742	0.12263	-0.365372	0.0412967	0.850409	0.693938	1.04216
ieu-b-85.vcf	ebi-a-GCST90001956	CD33 on CD33+ HLA DR+	id:ebi-a-GCST90001956	75	-0.0250022	0.0742215	0.736223	-0.170476	0.120472	0.975308	0.843263	1.12803
ieu-b-85.vcf	ebi-a-GCST90001956	CD33 on CD33+ HLA DR+	id:ebi-a-GCST90001956	75	-0.0261498	0.10637	0.806489	-0.234636	0.182336	0.974189	0.790859	1.20002
ieu-b-85.vcf	ebi-a-GCST90001420	IgD- CD38+ B cell Absolute Count	id:ebi-a-GCST90001420	84	-0.00254358	0.0319157	0.936478	-0.0650984	0.0600112	0.99746	0.936975	1.06185
ieu-b-85.vcf	ebi-a-GCST90001420	IgD- CD38+ B cell Absolute Count	id:ebi-a-GCST90001420	84	0.00315456	0.0653886	0.96164	-0.125007	0.131316	1.00316	0.882491	1.14033
ieu-b-85.vcf	ebi-a-GCST90001420	IgD- CD38+ B cell Absolute Count	id:ebi-a-GCST90001420	84	-0.00578549	0.0490449	0.906097	-0.101913	0.0903425	0.994231	0.903108	1.09455
ieu-b-85.vcf	ebi-a-GCST90001420	IgD- CD38+ B cell Absolute Count	id:ebi-a-GCST90001420	84	0.014064	0.0672127	0.834769	-0.117673	0.145801	1.01416	0.888987	1.15697
ieu-b-85.vcf	ebi-a-GCST90001536	CD45RA- CD4+ T cell %T cell	id:ebi-a-GCST90001536	92	0.0022726	0.0319564	0.943306	-0.060362	0.0649072	1.00228	0.941424	1.06706
ieu-b-85.vcf	ebi-a-GCST90001536	CD45RA- CD4+ T cell %T cell	id:ebi-a-GCST90001536	92	0.0246927	0.0638343	0.699799	-0.100423	0.149808	1.025	0.904455	1.16161
ieu-b-85.vcf	ebi-a-GCST90001536	CD45RA- CD4+ T cell %T cell	id:ebi-a-GCST90001536	92	0.0367274	0.0451757	0.416224	-0.051817	0.125272	1.03741	0.949503	1.13346
ieu-b-85.vcf	ebi-a-GCST90001536	CD45RA- CD4+ T cell %T cell	id:ebi-a-GCST90001536	92	0.0542071	0.0616724	0.381742	-0.0666708	0.175085	1.0557	0.935503	1.19135
ieu-b-85.vcf	ebi-a-GCST90001472	CD62L- CD86+ myeloid Dendritic Cell Absolute Count	id:ebi-a-GCST90001472	97	0.0127312	0.0340383	0.708386	-0.0539839	0.0794462	1.01281	0.947447	1.08269
ieu-b-85.vcf	ebi-a-GCST90001472	CD62L- CD86+ myeloid Dendritic Cell Absolute Count	id:ebi-a-GCST90001472	97	-0.0579831	0.0675477	0.392831	-0.190377	0.0744104	0.943666	0.826648	1.07725
ieu-b-85.vcf	ebi-a-GCST90001472	CD62L- CD86+ myeloid Dendritic Cell Absolute Count	id:ebi-a-GCST90001472	97	-0.00715881	0.0492599	0.884452	-0.103708	0.0893906	0.992867	0.901488	1.09351
ieu-b-85.vcf	ebi-a-GCST90001472	CD62L- CD86+ myeloid Dendritic Cell Absolute Count	id:ebi-a-GCST90001472	97	-0.0380382	0.0660249	0.565883	-0.167447	0.0913706	0.962676	0.845822	1.09567
ieu-b-85.vcf	ebi-a-GCST90001720	BAFF-R on transitional B cell	id:ebi-a-GCST90001720	90	-0.0331832	0.0333953	0.320393	-0.098638	0.0322715	0.967361	0.906071	1.0328
ieu-b-85.vcf	ebi-a-GCST90001720	BAFF-R on transitional B cell	id:ebi-a-GCST90001720	90	0.0308415	0.0672264	0.64753	-0.100922	0.162605	1.03132	0.904003	1.17657
ieu-b-85.vcf	ebi-a-GCST90001720	BAFF-R on transitional B cell	id:ebi-a-GCST90001720	90	-0.018654	0.049781	0.707869	-0.116225	0.0789169	0.981519	0.890275	1.08211
ieu-b-85.vcf	ebi-a-GCST90001720	BAFF-R on transitional B cell	id:ebi-a-GCST90001720	90	-0.0127222	0.07053	0.857265	-0.150961	0.125517	0.987358	0.859881	1.13373
ieu-b-85.vcf	ebi-a-GCST90001475	HLA DR++ monocyte %monocyte	id:ebi-a-GCST90001475	90	-0.0161295	0.0328625	0.623556	-0.0805401	0.0482811	0.984	0.922618	1.04947
ieu-b-85.vcf	ebi-a-GCST90001475	HLA DR++ monocyte %monocyte	id:ebi-a-GCST90001475	90	-0.0461331	0.0682213	0.50067	-0.179847	0.0875807	0.954915	0.835398	1.09153
ieu-b-85.vcf	ebi-a-GCST90001475	HLA DR++ monocyte %monocyte	id:ebi-a-GCST90001475	90	-0.0444705	0.0474549	0.348702	-0.137482	0.0485412	0.956504	0.87155	1.04974
ieu-b-85.vcf	ebi-a-GCST90001475	HLA DR++ monocyte %monocyte	id:ebi-a-GCST90001475	90	-0.0543514	0.0632509	0.392484	-0.178323	0.0696203	0.947099	0.836672	1.0721
ieu-b-85.vcf	ebi-a-GCST90001907	CCR7 on naive CD4+ T cell	id:ebi-a-GCST90001907	89	0.0242921	0.0364529	0.505158	-0.0471556	0.0957398	1.02459	0.953939	1.10047
ieu-b-85.vcf	ebi-a-GCST90001907	CCR7 on naive CD4+ T cell	id:ebi-a-GCST90001907	89	0.0837727	0.072533	0.251269	-0.0583919	0.225937	1.08738	0.94328	1.2535
[truncated: 926 more rows]
