# Supplementary material for: Causal role of immune cells in prostate cancer: a bidirectional Mendelian-randomization analyses
Source: Aging (Albany NY). 2024 Jun 17;16(12):10477–88. doi: 10.18632/aging.205942 (PMC11236311; doi:10.18632/aging.205942)
Supplement: Supplementary Table 7 [file aging-16-205942-s008.xlsx]

## Sheet: Sheet1
Supplementary Table 7. The results of Cochrane’s Q test for PCa on immune cells.
id.exposure	id.outcome	outcome	Q	Q_df	Q_pval
ieu-b-85.vcf	ebi-a-GCST90001852	CD3 on CD39+ resting CD4 regulatory T cell	39.4801	78	0.999916
ieu-b-85.vcf	ebi-a-GCST90001852	CD3 on CD39+ resting CD4 regulatory T cell	39.5036	79	0.999941
ieu-b-85.vcf	ebi-a-GCST90001946	CD33 on CD14+ monocyte	26.2218	77	1
ieu-b-85.vcf	ebi-a-GCST90001946	CD33 on CD14+ monocyte	27.1917	78	1
ieu-b-85.vcf	ebi-a-GCST90001957	CD33 on CD33+ HLA DR+ CD14-	20.6958	72	1
ieu-b-85.vcf	ebi-a-GCST90001957	CD33 on CD33+ HLA DR+ CD14-	23.0509	73	1
ieu-b-85.vcf	ebi-a-GCST90001897	CD28 on CD39+ CD8+ T cell	47.7951	83	0.999319
ieu-b-85.vcf	ebi-a-GCST90001897	CD28 on CD39+ CD8+ T cell	48.6849	84	0.999282
ieu-b-85.vcf	ebi-a-GCST90001538	Central Memory CD4+ T cell %CD4+ T cell	49.8351	91	0.999864
ieu-b-85.vcf	ebi-a-GCST90001538	Central Memory CD4+ T cell %CD4+ T cell	49.8459	92	0.999901
ieu-b-85.vcf	ebi-a-GCST90001721	CD19 on CD20- B cell	41.7527	89	0.999995
ieu-b-85.vcf	ebi-a-GCST90001721	CD19 on CD20- B cell	41.8806	90	0.999997
ieu-b-85.vcf	ebi-a-GCST90001686	CD28- CD8+ T cell %CD8+ T cell	51.7602	93	0.999835
ieu-b-85.vcf	ebi-a-GCST90001686	CD28- CD8+ T cell %CD8+ T cell	53.8144	94	0.999718
ieu-b-85.vcf	ebi-a-GCST90001682	CD127- CD8+ T cell %T cell	55.7036	91	0.998691
ieu-b-85.vcf	ebi-a-GCST90001682	CD127- CD8+ T cell %T cell	56.3493	92	0.998749
ieu-b-85.vcf	ebi-a-GCST90001445	IgD- CD38- B cell %B cell	48.1447	99	0.999996
ieu-b-85.vcf	ebi-a-GCST90001445	IgD- CD38- B cell %B cell	48.352	100	0.999997
ieu-b-85.vcf	ebi-a-GCST90002041	CD45 on lymphocyte	23.8816	74	1
ieu-b-85.vcf	ebi-a-GCST90002041	CD45 on lymphocyte	23.887	75	1
ieu-b-85.vcf	ebi-a-GCST90002093	CD11b on CD66b++ myeloid cell	16.9533	67	1
ieu-b-85.vcf	ebi-a-GCST90002093	CD11b on CD66b++ myeloid cell	16.9539	68	1
ieu-b-85.vcf	ebi-a-GCST90001923	CD127 on CD45RA- CD4 not regulatory T cell	39.7668	84	0.99999
ieu-b-85.vcf	ebi-a-GCST90001923	CD127 on CD45RA- CD4 not regulatory T cell	39.8649	85	0.999993
ieu-b-85.vcf	ebi-a-GCST90001968	FSC-A on B cell	38.8161	89	0.999999
ieu-b-85.vcf	ebi-a-GCST90001968	FSC-A on B cell	41.548	90	0.999997
ieu-b-85.vcf	ebi-a-GCST90001888	CD28 on CD39+ secreting CD4 regulatory T cell	41.4525	88	0.999994
ieu-b-85.vcf	ebi-a-GCST90001888	CD28 on CD39+ secreting CD4 regulatory T cell	41.9563	89	0.999995
ieu-b-85.vcf	ebi-a-GCST90001553	Naive CD8+ T cell %T cell	51.1406	91	0.999763
ieu-b-85.vcf	ebi-a-GCST90001553	Naive CD8+ T cell %T cell	54.2013	92	0.999417
ieu-b-85.vcf	ebi-a-GCST90001847	CD3 on HLA DR+ T cell	36.258	89	1
ieu-b-85.vcf	ebi-a-GCST90001847	CD3 on HLA DR+ T cell	36.2884	90	1
ieu-b-85.vcf	ebi-a-GCST90002097	CD11b on CD33+ HLA DR+ CD14dim	20.049	66	1
ieu-b-85.vcf	ebi-a-GCST90002097	CD11b on CD33+ HLA DR+ CD14dim	20.2269	67	1
ieu-b-85.vcf	ebi-a-GCST90002060	CD8 on HLA DR+ CD8+ T cell	38.5103	86	0.999998
ieu-b-85.vcf	ebi-a-GCST90002060	CD8 on HLA DR+ CD8+ T cell	38.6212	87	0.999998
ieu-b-85.vcf	ebi-a-GCST90001851	CD3 on T cell	40.0707	87	0.999996
ieu-b-85.vcf	ebi-a-GCST90001851	CD3 on T cell	40.0878	88	0.999997
ieu-b-85.vcf	ebi-a-GCST90001651	Granulocyte Absolute Count	61.2419	91	0.992958
ieu-b-85.vcf	ebi-a-GCST90001651	Granulocyte Absolute Count	62.0631	92	0.992953
ieu-b-85.vcf	ebi-a-GCST90001900	CD28 on resting CD4 regulatory T cell	8.99265	23	0.995982
ieu-b-85.vcf	ebi-a-GCST90001900	CD28 on resting CD4 regulatory T cell	9.09608	24	0.997384
ieu-b-85.vcf	ebi-a-GCST90001729	CD19 on IgD+ CD38+ B cell	38.6636	88	0.999999
ieu-b-85.vcf	ebi-a-GCST90001729	CD19 on IgD+ CD38+ B cell	39.0742	89	0.999999
ieu-b-85.vcf	ebi-a-GCST90001534	CD45RA- CD4+ T cell Absolute Count	44.7067	102	1
ieu-b-85.vcf	ebi-a-GCST90001534	CD45RA- CD4+ T cell Absolute Count	44.7741	103	1
ieu-b-85.vcf	ebi-a-GCST90001942	CD25 on CD39+ secreting CD4 regulatory T cell	34.1173	87	1
ieu-b-85.vcf	ebi-a-GCST90001942	CD25 on CD39+ secreting CD4 regulatory T cell	34.3014	88	1
ieu-b-85.vcf	ebi-a-GCST90002010	HLA DR on monocyte	39.4008	88	0.999998
ieu-b-85.vcf	ebi-a-GCST90002010	HLA DR on monocyte	39.5886	89	0.999999
ieu-b-85.vcf	ebi-a-GCST90001693	CD28+ CD45RA- CD8+ T cell Absolute Count	47.8219	96	0.99999
ieu-b-85.vcf	ebi-a-GCST90001693	CD28+ CD45RA- CD8+ T cell Absolute Count	49.3822	97	0.999985
ieu-b-85.vcf	ebi-a-GCST90002078	SSC-A on granulocyte	37.4877	91	1
ieu-b-85.vcf	ebi-a-GCST90002078	SSC-A on granulocyte	39.1007	92	1
ieu-b-85.vcf	ebi-a-GCST90001868	CD3 on CD4 regulatory T cell	7.26308	22	0.998639
ieu-b-85.vcf	ebi-a-GCST90001868	CD3 on CD4 regulatory T cell	7.61017	23	0.998909
ieu-b-85.vcf	ebi-a-GCST90001422	CD20- CD38- B cell %B cell	48.0935	95	0.999984
ieu-b-85.vcf	ebi-a-GCST90001422	CD20- CD38- B cell %B cell	48.4391	96	0.999987
ieu-b-85.vcf	ebi-a-GCST90002006	CD64 on monocyte	47.6543	103	0.999999
ieu-b-85.vcf	ebi-a-GCST90002006	CD64 on monocyte	47.9833	104	1
ieu-b-85.vcf	ebi-a-GCST90001618	HLA DR+ T cell Absolute Count	49.774	92	0.999904
ieu-b-85.vcf	ebi-a-GCST90001618	HLA DR+ T cell Absolute Count	50.1993	93	0.999916
ieu-b-85.vcf	ebi-a-GCST90001998	PDL-1 on CD14+ CD16+ monocyte	41.6355	90	0.999997
ieu-b-85.vcf	ebi-a-GCST90001998	PDL-1 on CD14+ CD16+ monocyte	42.1762	91	0.999997
ieu-b-85.vcf	ebi-a-GCST90001663	CD28- CD8dim T cell Absolute Count	53.4092	100	0.999964
ieu-b-85.vcf	ebi-a-GCST90001663	CD28- CD8dim T cell Absolute Count	54.2955	101	0.999961
ieu-b-85.vcf	ebi-a-GCST90001908	CCR7 on naive CD8+ T cell	43.1699	89	0.99999
ieu-b-85.vcf	ebi-a-GCST90001908	CCR7 on naive CD8+ T cell	43.8416	90	0.99999
ieu-b-85.vcf	ebi-a-GCST90001975	FSC-A on HLA DR+ T cell	49.3007	91	0.999892
ieu-b-85.vcf	ebi-a-GCST90001975	FSC-A on HLA DR+ T cell	49.4489	92	0.999917
ieu-b-85.vcf	ebi-a-GCST90001857	CD3 on activated & secreting CD4 regulatory T cell	34.2836	89	1
ieu-b-85.vcf	ebi-a-GCST90001857	CD3 on activated & secreting CD4 regulatory T cell	34.7567	90	1
ieu-b-85.vcf	ebi-a-GCST90001728	CD19 on IgD+ CD38- unswitched memory B cell	23.5204	76	1
ieu-b-85.vcf	ebi-a-GCST90001728	CD19 on IgD+ CD38- unswitched memory B cell	23.6007	77	1
ieu-b-85.vcf	ebi-a-GCST90001437	Naive-mature B cell %lymphocyte	53.9937	89	0.998761
ieu-b-85.vcf	ebi-a-GCST90001437	Naive-mature B cell %lymphocyte	54.6531	90	0.998809
ieu-b-85.vcf	ebi-a-GCST90001573	Terminally Differentiated CD4-CD8- T cell %CD4-CD8- T cell	36.1915	80	0.999994
ieu-b-85.vcf	ebi-a-GCST90001573	Terminally Differentiated CD4-CD8- T cell %CD4-CD8- T cell	36.6474	81	0.999995
ieu-b-85.vcf	ebi-a-GCST90002069	CD4 on CD39+ secreting CD4 regulatory T cell	36.9057	83	0.999997
ieu-b-85.vcf	ebi-a-GCST90002069	CD4 on CD39+ secreting CD4 regulatory T cell	38.4518	84	0.999995
ieu-b-85.vcf	ebi-a-GCST90001969	FSC-A on Natural Killer	48.3392	90	0.999903
ieu-b-85.vcf	ebi-a-GCST90001969	FSC-A on Natural Killer	48.3996	91	0.999928
ieu-b-85.vcf	ebi-a-GCST90001669	CD28+ CD45RA- CD8dim T cell Absolute Count	40.2701	89	0.999998
ieu-b-85.vcf	ebi-a-GCST90001669	CD28+ CD45RA- CD8dim T cell Absolute Count	40.2825	90	0.999999
ieu-b-85.vcf	ebi-a-GCST90001498	Activated & resting CD4 regulatory T cell Absolute Count	45.2909	86	0.99991
ieu-b-85.vcf	ebi-a-GCST90001498	Activated & resting CD4 regulatory T cell Absolute Count	45.8504	87	0.999917
ieu-b-85.vcf	ebi-a-GCST90001778	CD25 on IgD+ CD24+ B cell	40.236	93	1
ieu-b-85.vcf	ebi-a-GCST90001778	CD25 on IgD+ CD24+ B cell	40.6249	94	1
ieu-b-85.vcf	ebi-a-GCST90001592	CD8+ T cell Absolute Count	41.0557	98	1
ieu-b-85.vcf	ebi-a-GCST90001592	CD8+ T cell Absolute Count	41.0615	99	1
ieu-b-85.vcf	ebi-a-GCST90001952	CD33 on Monocytic Myeloid-Derived Suppressor Cells	27.8317	73	1
ieu-b-85.vcf	ebi-a-GCST90001952	CD33 on Monocytic Myeloid-Derived Suppressor Cells	28.9754	74	0.999999
ieu-b-85.vcf	ebi-a-GCST90002002	PDL-1 on monocyte	40.6618	93	1
ieu-b-85.vcf	ebi-a-GCST90002002	PDL-1 on monocyte	40.6805	94	1
ieu-b-85.vcf	ebi-a-GCST90001404	Plasma Blast-Plasma Cell %B cell	42.6404	80	0.999805
ieu-b-85.vcf	ebi-a-GCST90001404	Plasma Blast-Plasma Cell %B cell	43.5149	81	0.999791
ieu-b-85.vcf	ebi-a-GCST90001392	IgD+ CD38+ B cell Absolute Count	47.9637	90	0.999918
ieu-b-85.vcf	ebi-a-GCST90001392	IgD+ CD38+ B cell Absolute Count	48.0068	91	0.99994
ieu-b-85.vcf	ebi-a-GCST90001872	HVEM on naive CD8+ T cell	22.7188	61	0.999998
ieu-b-85.vcf	ebi-a-GCST90001872	HVEM on naive CD8+ T cell	22.9293	62	0.999999
ieu-b-85.vcf	ebi-a-GCST90001929	CD127 on CD28+ CD45RA+ CD8+ T cell	27.3424	88	1
ieu-b-85.vcf	ebi-a-GCST90001929	CD127 on CD28+ CD45RA+ CD8+ T cell	27.9132	89	1
ieu-b-85.vcf	ebi-a-GCST90001461	Dendritic Cell Absolute Count	47.5389	89	0.999906
ieu-b-85.vcf	ebi-a-GCST90001461	Dendritic Cell Absolute Count	47.7718	90	0.999925
ieu-b-85.vcf	ebi-a-GCST90001890	CD28 on CD45RA+ CD4+ T cell	29.5973	76	1
ieu-b-85.vcf	ebi-a-GCST90001890	CD28 on CD45RA+ CD4+ T cell	29.61	77	1
ieu-b-85.vcf	ebi-a-GCST90001507	CD25++ CD45RA+ CD4 not regulatory T cell Absolute Count	46.1992	88	0.99993
ieu-b-85.vcf	ebi-a-GCST90001507	CD25++ CD45RA+ CD4 not regulatory T cell Absolute Count	46.5991	89	0.99994
ieu-b-85.vcf	ebi-a-GCST90001424	IgD+ B cell %Lymphocyte	55.8825	90	0.998195
ieu-b-85.vcf	ebi-a-GCST90001424	IgD+ B cell %Lymphocyte	56.2684	91	0.998417
ieu-b-85.vcf	ebi-a-GCST90001554	Effector Memory CD8+ T cell Absolute Count	39.5461	91	0.999999
ieu-b-85.vcf	ebi-a-GCST90001554	Effector Memory CD8+ T cell Absolute Count	39.5733	92	1
ieu-b-85.vcf	ebi-a-GCST90001487	Activated CD4 regulatory T cell %CD4 regulatory T cell	37.4087	88	1
ieu-b-85.vcf	ebi-a-GCST90001487	Activated CD4 regulatory T cell %CD4 regulatory T cell	38.0158	89	1
ieu-b-85.vcf	ebi-a-GCST90001477	HLA DR++ monocyte Absolute Count	45.7829	93	0.99999
ieu-b-85.vcf	ebi-a-GCST90001477	HLA DR++ monocyte Absolute Count	45.9019	94	0.999993
ieu-b-85.vcf	ebi-a-GCST90001528	CD33dim HLA DR+ CD11b- %CD33dim HLA DR+	24.8246	82	1
ieu-b-85.vcf	ebi-a-GCST90001528	CD33dim HLA DR+ CD11b- %CD33dim HLA DR+	25.6145	83	1
ieu-b-85.vcf	ebi-a-GCST90001770	CD24 on IgD- CD38dim B cell	7.75907	18	0.982011
ieu-b-85.vcf	ebi-a-GCST90001770	CD24 on IgD- CD38dim B cell	7.93624	19	0.987301
ieu-b-85.vcf	ebi-a-GCST90001788	CD25 on IgD- CD38+ B cell	42.5575	92	0.999998
ieu-b-85.vcf	ebi-a-GCST90001788	CD25 on IgD- CD38+ B cell	42.5653	93	0.999998
ieu-b-85.vcf	ebi-a-GCST90001569	Effector Memory CD4-CD8- T cell Absolute Count	46.4788	95	0.999993
ieu-b-85.vcf	ebi-a-GCST90001569	Effector Memory CD4-CD8- T cell Absolute Count	48.7491	96	0.999985
ieu-b-85.vcf	ebi-a-GCST90001876	HVEM on Central Memory CD4+ T cell	19.9241	62	1
ieu-b-85.vcf	ebi-a-GCST90001876	HVEM on Central Memory CD4+ T cell	20.1367	63	1
ieu-b-85.vcf	ebi-a-GCST90001884	CD16-CD56 on Natural Killer	36.8857	82	0.999996
ieu-b-85.vcf	ebi-a-GCST90001884	CD16-CD56 on Natural Killer	37.701	83	0.999995
ieu-b-85.vcf	ebi-a-GCST90002019	CD14 on Monocytic Myeloid-Derived Suppressor Cells	18.5531	70	1
ieu-b-85.vcf	ebi-a-GCST90002019	CD14 on Monocytic Myeloid-Derived Suppressor Cells	18.746	71	1
ieu-b-85.vcf	ebi-a-GCST90002087	CD11c on myeloid Dendritic Cell	48.6969	76	0.993766
ieu-b-85.vcf	ebi-a-GCST90002087	CD11c on myeloid Dendritic Cell	48.7617	77	0.995042
ieu-b-85.vcf	ebi-a-GCST90001860	CD3 on CD39+ CD4+ T cell	35.1788	84	0.999999
ieu-b-85.vcf	ebi-a-GCST90001860	CD3 on CD39+ CD4+ T cell	35.4551	85	1
ieu-b-85.vcf	ebi-a-GCST90001474	Plasmacytoid Dendritic Cell %Dendritic Cell	39.8553	87	0.999997
ieu-b-85.vcf	ebi-a-GCST90001474	Plasmacytoid Dendritic Cell %Dendritic Cell	39.8621	88	0.999998
ieu-b-85.vcf	ebi-a-GCST90001602	Lymphocyte %leukocyte	54.0496	92	0.999449
ieu-b-85.vcf	ebi-a-GCST90001602	Lymphocyte %leukocyte	54.473	93	0.999514
ieu-b-85.vcf	ebi-a-GCST90001578	Transitional B cell %lymphocyte	45.0296	95	0.999997
ieu-b-85.vcf	ebi-a-GCST90001578	Transitional B cell %lymphocyte	45.0373	96	0.999998
ieu-b-85.vcf	ebi-a-GCST90002114	HLA DR on HLA DR+ CD4+ T cell	25.0143	81	1
ieu-b-85.vcf	ebi-a-GCST90002114	HLA DR on HLA DR+ CD4+ T cell	26.1961	82	1
ieu-b-85.vcf	ebi-a-GCST90001894	CD28 on CD28+ CD4+ T cell	34.7595	87	1
ieu-b-85.vcf	ebi-a-GCST90001894	CD28 on CD28+ CD4+ T cell	34.7663	88	1
ieu-b-85.vcf	ebi-a-GCST90001549	Central Memory CD8+ T cell %CD8+ T cell	39.3075	89	0.999999
ieu-b-85.vcf	ebi-a-GCST90001549	Central Memory CD8+ T cell %CD8+ T cell	39.3621	90	0.999999
ieu-b-85.vcf	ebi-a-GCST90001785	CD25 on IgD- CD24- B cell	46.5077	93	0.999986
ieu-b-85.vcf	ebi-a-GCST90001785	CD25 on IgD- CD24- B cell	46.5077	94	0.99999
ieu-b-85.vcf	ebi-a-GCST90002062	CD4 on CD28+ CD4+ T cell	37.4957	87	0.999999
ieu-b-85.vcf	ebi-a-GCST90002062	CD4 on CD28+ CD4+ T cell	37.5909	88	0.999999
ieu-b-85.vcf	ebi-a-GCST90001522	CD33- HLA DR- Absolute Count	31.5204	67	0.999933
ieu-b-85.vcf	ebi-a-GCST90001522	CD33- HLA DR- Absolute Count	31.538	68	0.999954
ieu-b-85.vcf	ebi-a-GCST90001736	CD19 on memory B cell	41.677	90	0.999997
ieu-b-85.vcf	ebi-a-GCST90001736	CD19 on memory B cell	41.6837	91	0.999998
ieu-b-85.vcf	ebi-a-GCST90001919	CD45 on Natural Killer T	50.3293	86	0.999245
ieu-b-85.vcf	ebi-a-GCST90001919	CD45 on Natural Killer T	51.436	87	0.999141
ieu-b-85.vcf	ebi-a-GCST90001585	CD14+ CD16+ monocyte %monocyte	41.99	93	0.999999
ieu-b-85.vcf	ebi-a-GCST90001585	CD14+ CD16+ monocyte %monocyte	42.2752	94	0.999999
ieu-b-85.vcf	ebi-a-GCST90002021	CD14 on CD33dim HLA DR+ CD11b+	20.4317	69	1
ieu-b-85.vcf	ebi-a-GCST90002021	CD14 on CD33dim HLA DR+ CD11b+	20.5928	70	1
ieu-b-85.vcf	ebi-a-GCST90001587	CD16+ monocyte %monocyte	40.4418	95	1
ieu-b-85.vcf	ebi-a-GCST90001587	CD16+ monocyte %monocyte	40.4857	96	1
ieu-b-85.vcf	ebi-a-GCST90001955	CD33 on Immature Myeloid-Derived Suppressor Cells	23.8881	65	0.999999
ieu-b-85.vcf	ebi-a-GCST90001955	CD33 on Immature Myeloid-Derived Suppressor Cells	24.9561	66	0.999999
ieu-b-85.vcf	ebi-a-GCST90001938	CD25 on CD39+ resting CD4 regulatory T cell	42.1852	86	0.999981
ieu-b-85.vcf	ebi-a-GCST90001938	CD25 on CD39+ resting CD4 regulatory T cell	42.4229	87	0.999985
ieu-b-85.vcf	ebi-a-GCST90001561	CD45RA+ CD8+ T cell %CD8+ T cell	46.4559	88	0.999921
ieu-b-85.vcf	ebi-a-GCST90001561	CD45RA+ CD8+ T cell %CD8+ T cell	47.1657	89	0.999921
ieu-b-85.vcf	ebi-a-GCST90001903	CD86 on myeloid Dendritic Cell	39.7426	89	0.999999
ieu-b-85.vcf	ebi-a-GCST90001903	CD86 on myeloid Dendritic Cell	39.7432	90	0.999999
ieu-b-85.vcf	ebi-a-GCST90002089	CD11c on monocyte	33.5028	78	0.999998
ieu-b-85.vcf	ebi-a-GCST90002089	CD11c on monocyte	33.5437	79	0.999998
ieu-b-85.vcf	ebi-a-GCST90001617	TCRgd T cell %lymphocyte	46.915	91	0.999965
ieu-b-85.vcf	ebi-a-GCST90001617	TCRgd T cell %lymphocyte	47.7238	92	0.999963
ieu-b-85.vcf	ebi-a-GCST90001932	CD127 on CD45RA+ CD4+ T cell	32.1658	88	1
ieu-b-85.vcf	ebi-a-GCST90001932	CD127 on CD45RA+ CD4+ T cell	32.5002	89	1
ieu-b-85.vcf	ebi-a-GCST90001464	CD86+ myeloid Dendritic Cell Absolute Count	39.5063	96	1
ieu-b-85.vcf	ebi-a-GCST90001464	CD86+ myeloid Dendritic Cell Absolute Count	39.5776	97	1
ieu-b-85.vcf	ebi-a-GCST90001402	Switched memory B cell %B cell	40.1042	90	0.999999
ieu-b-85.vcf	ebi-a-GCST90001402	Switched memory B cell %B cell	40.1577	91	0.999999
ieu-b-85.vcf	ebi-a-GCST90001589	CD4+/CD8+ T cell	53.549	99	0.999946
ieu-b-85.vcf	ebi-a-GCST90001589	CD4+/CD8+ T cell	53.7131	100	0.999958
ieu-b-85.vcf	ebi-a-GCST90001882	HVEM on Central Memory CD8+ T cell	22.1673	63	1
ieu-b-85.vcf	ebi-a-GCST90001882	HVEM on Central Memory CD8+ T cell	22.1757	64	1
ieu-b-85.vcf	ebi-a-GCST90002036	CD80 on CD62L+ myeloid Dendritic Cell	42.1378	91	0.999997
ieu-b-85.vcf	ebi-a-GCST90002036	CD80 on CD62L+ myeloid Dendritic Cell	42.3844	92	0.999998
ieu-b-85.vcf	ebi-a-GCST90001667	CD28+ CD45RA- CD8dim T cell %T cell	37.2052	93	1
ieu-b-85.vcf	ebi-a-GCST90001667	CD28+ CD45RA- CD8dim T cell %T cell	37.2195	94	1
ieu-b-85.vcf	ebi-a-GCST90002020	CD14 on CD33+ HLA DR+ CD14dim	21.39	66	1
ieu-b-85.vcf	ebi-a-GCST90002020	CD14 on CD33+ HLA DR+ CD14dim	21.8901	67	1
ieu-b-85.vcf	ebi-a-GCST90002104	HLA DR on myeloid Dendritic Cell	34.879	92	1
ieu-b-85.vcf	ebi-a-GCST90002104	HLA DR on myeloid Dendritic Cell	35.4887	93	1
ieu-b-85.vcf	ebi-a-GCST90001652	Granulocyte %leukocyte	55.1282	91	0.998927
ieu-b-85.vcf	ebi-a-GCST90001652	Granulocyte %leukocyte	55.2502	92	0.999146
ieu-b-85.vcf	ebi-a-GCST90002088	CD11c on CD62L+ myeloid Dendritic Cell	40.1792	80	0.999942
ieu-b-85.vcf	ebi-a-GCST90002088	CD11c on CD62L+ myeloid Dendritic Cell	40.3821	81	0.999955
ieu-b-85.vcf	ebi-a-GCST90001892	CD28 on CD39+ CD4+ T cell	40.621	85	0.999988
ieu-b-85.vcf	ebi-a-GCST90001892	CD28 on CD39+ CD4+ T cell	40.6682	86	0.999992
ieu-b-85.vcf	ebi-a-GCST90001533	Basophil %CD33dim HLA DR- CD66b-	18.887	78	1
ieu-b-85.vcf	ebi-a-GCST90001533	Basophil %CD33dim HLA DR- CD66b-	18.9002	79	1
ieu-b-85.vcf	ebi-a-GCST90001539	Central Memory CD4+ T cell %T cell	38.9388	81	0.999979
ieu-b-85.vcf	ebi-a-GCST90001539	Central Memory CD4+ T cell %T cell	38.9616	82	0.999986
ieu-b-85.vcf	ebi-a-GCST90001862	CD3 on CD28+ CD4-CD8- T cell	36.1683	86	1
ieu-b-85.vcf	ebi-a-GCST90001862	CD3 on CD28+ CD4-CD8- T cell	36.2591	87	1
ieu-b-85.vcf	ebi-a-GCST90001581	CD14- CD16- Absolute Count	46.219	102	1
ieu-b-85.vcf	ebi-a-GCST90001581	CD14- CD16- Absolute Count	47.1306	103	1
ieu-b-85.vcf	ebi-a-GCST90001749	CD20 on IgD+ CD38- naive B cell	29.1703	91	1
ieu-b-85.vcf	ebi-a-GCST90001749	CD20 on IgD+ CD38- naive B cell	29.3247	92	1
ieu-b-85.vcf	ebi-a-GCST90001822	IgD on IgD+ CD38- B cell	59.2881	92	0.996795
ieu-b-85.vcf	ebi-a-GCST90001822	IgD on IgD+ CD38- B cell	61.7781	93	0.994782
ieu-b-85.vcf	ebi-a-GCST90001449	CD11c+ monocyte %monocyte	36.3694	83	0.999998
ieu-b-85.vcf	ebi-a-GCST90001449	CD11c+ monocyte %monocyte	36.7911	84	0.999998
ieu-b-85.vcf	ebi-a-GCST90001695	CD45RA- CD28- CD8+ T cell Absolute Count	34.5532	84	1
ieu-b-85.vcf	ebi-a-GCST90001695	CD45RA- CD28- CD8+ T cell Absolute Count	35.2151	85	1
ieu-b-85.vcf	ebi-a-GCST90001950	CD33 on Granulocytic Myeloid-Derived Suppressor Cells	17.7226	61	1
ieu-b-85.vcf	ebi-a-GCST90001950	CD33 on Granulocytic Myeloid-Derived Suppressor Cells	18.1333	62	1
ieu-b-85.vcf	ebi-a-GCST90001527	CD33dim HLA DR+ CD11b- Absolute Count	20.6837	66	1
ieu-b-85.vcf	ebi-a-GCST90001527	CD33dim HLA DR+ CD11b- Absolute Count	20.88	67	1
ieu-b-85.vcf	ebi-a-GCST90001650	HLA DR+ Natural Killer %CD3- lymphocyte	30.0963	82	1
ieu-b-85.vcf	ebi-a-GCST90001650	HLA DR+ Natural Killer %CD3- lymphocyte	31.0092	83	1
ieu-b-85.vcf	ebi-a-GCST90001571	Effector Memory CD4-CD8- T cell %T cell	37.576	92	1
ieu-b-85.vcf	ebi-a-GCST90001571	Effector Memory CD4-CD8- T cell %T cell	38.6934	93	1
ieu-b-85.vcf	ebi-a-GCST90001717	BAFF-R on unswitched memory B cell	45.2407	93	0.999993
ieu-b-85.vcf	ebi-a-GCST90001717	BAFF-R on unswitched memory B cell	45.2573	94	0.999995
ieu-b-85.vcf	ebi-a-GCST90001483	CD39+ resting CD4 regulatory T cell Absolute Count	42.1256	94	0.999999
ieu-b-85.vcf	ebi-a-GCST90001483	CD39+ resting CD4 regulatory T cell Absolute Count	43.2932	95	0.999999
ieu-b-85.vcf	ebi-a-GCST90002017	CCR2 on monocyte	43.4679	89	0.999988
ieu-b-85.vcf	ebi-a-GCST90002017	CCR2 on monocyte	44.0068	90	0.999989
ieu-b-85.vcf	ebi-a-GCST90002024	CD4 on naive CD4+ T cell	36.5855	86	0.999999
ieu-b-85.vcf	ebi-a-GCST90002024	CD4 on naive CD4+ T cell	36.5862	87	1
ieu-b-85.vcf	ebi-a-GCST90001619	HLA DR+ T cell%T cell	62.4446	99	0.998473
ieu-b-85.vcf	ebi-a-GCST90001619	HLA DR+ T cell%T cell	62.5275	100	0.99878
ieu-b-85.vcf	ebi-a-GCST90001495	CD39+ secreting CD4 regulatory T cell Absolute Count	41.0224	90	0.999998
ieu-b-85.vcf	ebi-a-GCST90001495	CD39+ secreting CD4 regulatory T cell Absolute Count	41.0224	91	0.999999
ieu-b-85.vcf	ebi-a-GCST90001817	CD38 on Plasma Blast-Plasma Cell	44.0148	99	1
ieu-b-85.vcf	ebi-a-GCST90001817	CD38 on Plasma Blast-Plasma Cell	44.2043	100	1
ieu-b-85.vcf	ebi-a-GCST90001953	CD33 on CD33dim HLA DR-	18.9426	67	1
ieu-b-85.vcf	ebi-a-GCST90001953	CD33 on CD33dim HLA DR-	19.5427	68	1
ieu-b-85.vcf	ebi-a-GCST90001579	CD14- CD16+ monocyte Absolute Count	43.5449	103	1
ieu-b-85.vcf	ebi-a-GCST90001579	CD14- CD16+ monocyte Absolute Count	43.5562	104	1
ieu-b-85.vcf	ebi-a-GCST90001447	IgD+ CD38+ B cell %B cell	48.5263	91	0.999924
ieu-b-85.vcf	ebi-a-GCST90001447	IgD+ CD38+ B cell %B cell	48.7091	92	0.999941
ieu-b-85.vcf	ebi-a-GCST90001709	BAFF-R on IgD+ CD38dim B cell	46.905	88	0.999903
ieu-b-85.vcf	ebi-a-GCST90001709	BAFF-R on IgD+ CD38dim B cell	46.9682	89	0.999928
ieu-b-85.vcf	ebi-a-GCST90002112	HLA DR on CD33- HLA DR+	24.2328	76	1
ieu-b-85.vcf	ebi-a-GCST90002112	HLA DR on CD33- HLA DR+	24.3778	77	1
ieu-b-85.vcf	ebi-a-GCST90001730	CD19 on IgD+ CD38dim B cell	38.7094	89	0.999999
ieu-b-85.vcf	ebi-a-GCST90001730	CD19 on IgD+ CD38dim B cell	39.1301	90	0.999999
ieu-b-85.vcf	ebi-a-GCST90002042	CD45 on CD33+ HLA DR+ CD14-	32.626	68	0.999914
ieu-b-85.vcf	ebi-a-GCST90002042	CD45 on CD33+ HLA DR+ CD14-	32.8132	69	0.999935
ieu-b-85.vcf	ebi-a-GCST90002038	CD80 on CD62L+ plasmacytoid Dendritic Cell	34.2	86	1
ieu-b-85.vcf	ebi-a-GCST90002038	CD80 on CD62L+ plasmacytoid Dendritic Cell	34.5099	87	1
ieu-b-85.vcf	ebi-a-GCST90001746	CD20 on IgD+ CD24+ B cell	41.8178	93	0.999999
ieu-b-85.vcf	ebi-a-GCST90001746	CD20 on IgD+ CD24+ B cell	41.8847	94	0.999999
ieu-b-85.vcf	ebi-a-GCST90001771	CD24 on memory B cell	48.7137	85	0.999459
ieu-b-85.vcf	ebi-a-GCST90001771	CD24 on memory B cell	49.0631	86	0.999538
ieu-b-85.vcf	ebi-a-GCST90001806	CD27 on unswitched memory B cell	42.4835	93	0.999999
ieu-b-85.vcf	ebi-a-GCST90001806	CD27 on unswitched memory B cell	42.784	94	0.999999
ieu-b-85.vcf	ebi-a-GCST90002100	CD45RA on naive CD8+ T cell	32.7453	89	1
ieu-b-85.vcf	ebi-a-GCST90002100	CD45RA on naive CD8+ T cell	33.5745	90	1
ieu-b-85.vcf	ebi-a-GCST90001768	CD24 on IgD+ CD38+ B cell	43.8587	89	0.999985
ieu-b-85.vcf	ebi-a-GCST90001768	CD24 on IgD+ CD38+ B cell	44.3844	90	0.999986
ieu-b-85.vcf	ebi-a-GCST90001858	CD3 on CD45RA+ CD4+ T cell	33.1546	85	1
ieu-b-85.vcf	ebi-a-GCST90001858	CD3 on CD45RA+ CD4+ T cell	34.9953	86	1
ieu-b-85.vcf	ebi-a-GCST90001555	Effector Memory CD8+ T cell %CD8+ T cell	55.0112	94	0.999553
ieu-b-85.vcf	ebi-a-GCST90001555	Effector Memory CD8+ T cell %CD8+ T cell	55.1877	95	0.999641
ieu-b-85.vcf	ebi-a-GCST90001716	BAFF-R on naive-mature B cell	48.6185	90	0.99989
ieu-b-85.vcf	ebi-a-GCST90001716	BAFF-R on naive-mature B cell	48.6919	91	0.999918
ieu-b-85.vcf	ebi-a-GCST90001411	IgD+ CD24+ B cell %B cell	41.9342	88	0.999992
ieu-b-85.vcf	ebi-a-GCST90001411	IgD+ CD24+ B cell %B cell	41.9469	89	0.999995
ieu-b-85.vcf	ebi-a-GCST90001646	Natural Killer %CD3- lymphocyte	60.5572	95	0.997722
ieu-b-85.vcf	ebi-a-GCST90001646	Natural Killer %CD3- lymphocyte	60.5891	96	0.998204
ieu-b-85.vcf	ebi-a-GCST90001542	Effector Memory CD4+ T cell Absolute Count	41.6829	99	1
ieu-b-85.vcf	ebi-a-GCST90001542	Effector Memory CD4+ T cell Absolute Count	41.6835	100	1
ieu-b-85.vcf	ebi-a-GCST90002080	SSC-A on T cell	33.7433	88	1
ieu-b-85.vcf	ebi-a-GCST90002080	SSC-A on T cell	33.7851	89	1
ieu-b-85.vcf	ebi-a-GCST90001795	CD25 on transitional B cell	44.9047	86	0.999925
ieu-b-85.vcf	ebi-a-GCST90001795	CD25 on transitional B cell	48.1622	87	0.999766
ieu-b-85.vcf	ebi-a-GCST90001744	CD20 on CD20- CD38- B cell	38.9512	85	0.999996
ieu-b-85.vcf	ebi-a-GCST90001744	CD20 on CD20- CD38- B cell	38.9851	86	0.999997
ieu-b-85.vcf	ebi-a-GCST90001989	CD40 on CD14- CD16+ monocyte	42.9187	91	0.999996
ieu-b-85.vcf	ebi-a-GCST90001989	CD40 on CD14- CD16+ monocyte	43.0487	92	0.999997
ieu-b-85.vcf	ebi-a-GCST90002037	CD80 on plasmacytoid Dendritic Cell	33.8849	84	1
ieu-b-85.vcf	ebi-a-GCST90002037	CD80 on plasmacytoid Dendritic Cell	34.1303	85	1
ieu-b-85.vcf	ebi-a-GCST90001833	CD62L on CD62L+ Dendritic Cell	34.2349	85	1
ieu-b-85.vcf	ebi-a-GCST90001833	CD62L on CD62L+ Dendritic Cell	34.5856	86	1
ieu-b-85.vcf	ebi-a-GCST90001556	Effector Memory CD8+ T cell %T cell	46.9797	88	0.999899
ieu-b-85.vcf	ebi-a-GCST90001556	Effector Memory CD8+ T cell %T cell	47.1178	89	0.999923
ieu-b-85.vcf	ebi-a-GCST90001546	Terminally Differentiated CD4+ T cell %CD4+ T cell	51.8247	93	0.99983
ieu-b-85.vcf	ebi-a-GCST90001546	Terminally Differentiated CD4+ T cell %CD4+ T cell	52.1242	94	0.999859
ieu-b-85.vcf	ebi-a-GCST90001986	CD14 on CD14+ CD16- monocyte	41.5769	98	1
ieu-b-85.vcf	ebi-a-GCST90001986	CD14 on CD14+ CD16- monocyte	41.6178	99	1
ieu-b-85.vcf	ebi-a-GCST90001732	CD19 on IgD- CD27- B cell	47.49	90	0.999934
ieu-b-85.vcf	ebi-a-GCST90001732	CD19 on IgD- CD27- B cell	47.7396	91	0.999947
ieu-b-85.vcf	ebi-a-GCST90001821	IgD on IgD+ CD24- B cell	43.7113	84	0.999917
ieu-b-85.vcf	ebi-a-GCST90001821	IgD on IgD+ CD24- B cell	44.3768	85	0.999918
ieu-b-85.vcf	ebi-a-GCST90001480	Resting CD4 regulatory T cell Absolute Count	39.1672	84	0.999993
ieu-b-85.vcf	ebi-a-GCST90001480	Resting CD4 regulatory T cell Absolute Count	39.3123	85	0.999995
ieu-b-85.vcf	ebi-a-GCST90001563	Central Memory CD4-CD8- T cell Absolute Count	43.7106	95	0.999999
ieu-b-85.vcf	ebi-a-GCST90001563	Central Memory CD4-CD8- T cell Absolute Count	43.7115	96	0.999999
ieu-b-85.vcf	ebi-a-GCST90001466	CD86+ plasmacytoid Dendritic Cell Absolute Count	39.3802	86	0.999996
ieu-b-85.vcf	ebi-a-GCST90001466	CD86+ plasmacytoid Dendritic Cell Absolute Count	39.3945	87	0.999997
ieu-b-85.vcf	ebi-a-GCST90001664	CD28+ CD45RA+ CD8dim T cell %T cell	40.7424	88	0.999996
ieu-b-85.vcf	ebi-a-GCST90001664	CD28+ CD45RA+ CD8dim T cell %T cell	41.5578	89	0.999996
ieu-b-85.vcf	ebi-a-GCST90001967	FSC-A on CD14+ monocyte	44.2743	91	0.999991
ieu-b-85.vcf	ebi-a-GCST90001967	FSC-A on CD14+ monocyte	44.5766	92	0.999993
ieu-b-85.vcf	ebi-a-GCST90001595	CD4+CD8+ T cell %T cell	9.79225	27	0.99901
ieu-b-85.vcf	ebi-a-GCST90001595	CD4+CD8+ T cell %T cell	9.79436	28	0.999427
ieu-b-85.vcf	ebi-a-GCST90001891	CD28 on CD45RA- CD4 not regulatory T cell	33.4352	95	1
ieu-b-85.vcf	ebi-a-GCST90001891	CD28 on CD45RA- CD4 not regulatory T cell	33.6088	96	1
ieu-b-85.vcf	ebi-a-GCST90001826	IgD on unswitched memory B cell	42.5404	93	0.999998
ieu-b-85.vcf	ebi-a-GCST90001826	IgD on unswitched memory B cell	42.6445	94	0.999999
ieu-b-85.vcf	ebi-a-GCST90001880	HVEM on CD45RA- CD4+ T cell	14.7193	58	1
ieu-b-85.vcf	ebi-a-GCST90001880	HVEM on CD45RA- CD4+ T cell	14.8242	59	1
ieu-b-85.vcf	ebi-a-GCST90001867	CD3 on CD4+ T cell	39.2472	91	1
ieu-b-85.vcf	ebi-a-GCST90001867	CD3 on CD4+ T cell	39.6789	92	1
ieu-b-85.vcf	ebi-a-GCST90001644	B cell %lymphocyte	45.9108	91	0.999979
ieu-b-85.vcf	ebi-a-GCST90001644	B cell %lymphocyte	45.9621	92	0.999985
ieu-b-85.vcf	ebi-a-GCST90002061	CD4 on CD39+ CD4+ T cell	35.661	88	1
ieu-b-85.vcf	ebi-a-GCST90002061	CD4 on CD39+ CD4+ T cell	36.2438	89	1
ieu-b-85.vcf	ebi-a-GCST90001911	CD45 on Natural Killer	28.0194	86	1
ieu-b-85.vcf	ebi-a-GCST90001911	CD45 on Natural Killer	28.2952	87	1
ieu-b-85.vcf	ebi-a-GCST90001864	CD3 on CD28+ CD45RA+ CD8+ T cell	33.247	86	1
ieu-b-85.vcf	ebi-a-GCST90001864	CD3 on CD28+ CD45RA+ CD8+ T cell	34.5557	87	1
ieu-b-85.vcf	ebi-a-GCST90002029	CD39 on CD39+ CD8+ T cell	51.7756	85	0.998318
ieu-b-85.vcf	ebi-a-GCST90002029	CD39 on CD39+ CD8+ T cell	52.0298	86	0.998597
ieu-b-85.vcf	ebi-a-GCST90002083	SSC-A on HLA DR+ T cell	37.4726	89	1
ieu-b-85.vcf	ebi-a-GCST90002083	SSC-A on HLA DR+ T cell	39.0571	90	0.999999
ieu-b-85.vcf	ebi-a-GCST90001834	CD62L on monocyte	29.22	77	1
ieu-b-85.vcf	ebi-a-GCST90001834	CD62L on monocyte	29.249	78	1
ieu-b-85.vcf	ebi-a-GCST90001446	IgD- CD38- B cell Absolute Count	40.0799	95	1
ieu-b-85.vcf	ebi-a-GCST90001446	IgD- CD38- B cell Absolute Count	40.3247	96	1
ieu-b-85.vcf	ebi-a-GCST90001623	Natural Killer T %lymphocyte	34.1874	91	1
ieu-b-85.vcf	ebi-a-GCST90001623	Natural Killer T %lymphocyte	35.5294	92	1
ieu-b-85.vcf	ebi-a-GCST90001831	CD62L on CD62L+ myeloid Dendritic Cell	27.665	87	1
ieu-b-85.vcf	ebi-a-GCST90001831	CD62L on CD62L+ myeloid Dendritic Cell	27.6829	88	1
ieu-b-85.vcf	ebi-a-GCST90002058	CD8 on CD8+ T cell	42.6909	79	0.999723
ieu-b-85.vcf	ebi-a-GCST90002058	CD8 on CD8+ T cell	42.7387	80	0.999796
ieu-b-85.vcf	ebi-a-GCST90001784	CD25 on IgD+ CD38dim B cell	44.9416	89	0.999973
ieu-b-85.vcf	ebi-a-GCST90001784	CD25 on IgD+ CD38dim B cell	45.3172	90	0.999977
ieu-b-85.vcf	ebi-a-GCST90001633	CD8dim Natural Killer T Absolute Count	52.3592	94	0.999844
ieu-b-85.vcf	ebi-a-GCST90001633	CD8dim Natural Killer T Absolute Count	52.4721	95	0.99988
ieu-b-85.vcf	ebi-a-GCST90001671	CD39+ CD8+ T cell %CD8+ T cell	54.2354	93	0.999556
ieu-b-85.vcf	ebi-a-GCST90001671	CD39+ CD8+ T cell %CD8+ T cell	54.3726	94	0.999649
ieu-b-85.vcf	ebi-a-GCST90001762	CD20 on IgD+ B cell	41.021	94	1
ieu-b-85.vcf	ebi-a-GCST90001762	CD20 on IgD+ B cell	41.0223	95	1
ieu-b-85.vcf	ebi-a-GCST90002026	CD4 on Terminally Differentiated CD4+ T cell	43.9905	82	0.999814
ieu-b-85.vcf	ebi-a-GCST90002026	CD4 on Terminally Differentiated CD4+ T cell	44.0082	83	0.999865
ieu-b-85.vcf	ebi-a-GCST90002054	CD8 on Central Memory CD8+ T cell	36.7264	87	1
ieu-b-85.vcf	ebi-a-GCST90002054	CD8 on Central Memory CD8+ T cell	36.7275	88	1
ieu-b-85.vcf	ebi-a-GCST90001934	CD25 on CD45RA+ CD4 not regulatory T cell	48.6689	87	0.99971
ieu-b-85.vcf	ebi-a-GCST90001934	CD25 on CD45RA+ CD4 not regulatory T cell	48.8771	88	0.999768
ieu-b-85.vcf	ebi-a-GCST90001763	CD20 on transitional B cell	45.524	91	0.999982
ieu-b-85.vcf	ebi-a-GCST90001763	CD20 on transitional B cell	45.5456	92	0.999988
ieu-b-85.vcf	ebi-a-GCST90001668	CD28+ CD45RA- CD8dim T cell %CD8dim T cell	41.2017	93	0.999999
ieu-b-85.vcf	ebi-a-GCST90001668	CD28+ CD45RA- CD8dim T cell %CD8dim T cell	41.7951	94	0.999999
ieu-b-85.vcf	ebi-a-GCST90001874	HVEM on Terminally Differentiated CD8+ T cell	19.1411	66	1
ieu-b-85.vcf	ebi-a-GCST90001874	HVEM on Terminally Differentiated CD8+ T cell	20.1201	67	1
ieu-b-85.vcf	ebi-a-GCST90001921	CD45 on HLA DR+ CD8+ T cell	45.3828	96	0.999998
ieu-b-85.vcf	ebi-a-GCST90001921	CD45 on HLA DR+ CD8+ T cell	45.4225	97	0.999998
ieu-b-85.vcf	ebi-a-GCST90001865	CD3 on CD28- CD8+ T cell	38.1091	86	0.999998
ieu-b-85.vcf	ebi-a-GCST90001865	CD3 on CD28- CD8+ T cell	38.1242	87	0.999999
ieu-b-85.vcf	ebi-a-GCST90002015	CCR2 on plasmacytoid Dendritic Cell	33.0416	86	1
ieu-b-85.vcf	ebi-a-GCST90002015	CCR2 on plasmacytoid Dendritic Cell	34.0029	87	1
ieu-b-85.vcf	ebi-a-GCST90001458	Myeloid Dendritic Cell Absolute Count	38.6684	91	1
ieu-b-85.vcf	ebi-a-GCST90001458	Myeloid Dendritic Cell Absolute Count	39.3345	92	1
ieu-b-85.vcf	ebi-a-GCST90001896	CD28 on CD28+ CD45RA+ CD8+ T cell	39.0525	95	1
ieu-b-85.vcf	ebi-a-GCST90001896	CD28 on CD28+ CD45RA+ CD8+ T cell	39.4893	96	1
ieu-b-85.vcf	ebi-a-GCST90001684	CD127- CD8+ T cell Absolute Count	42.9512	86	0.999972
ieu-b-85.vcf	ebi-a-GCST90001684	CD127- CD8+ T cell Absolute Count	43.5802	87	0.999973
ieu-b-85.vcf	ebi-a-GCST90001599	CD4-CD8- T cell %T cell	44.412	94	0.999997
ieu-b-85.vcf	ebi-a-GCST90001599	CD4-CD8- T cell %T cell	45.6011	95	0.999996
ieu-b-85.vcf	ebi-a-GCST90001866	CD3 on CD39+ CD8+ T cell	39.9009	79	0.999927
ieu-b-85.vcf	ebi-a-GCST90001866	CD3 on CD39+ CD8+ T cell	40.2902	80	0.999938
ieu-b-85.vcf	ebi-a-GCST90001596	CD8dim T cell Absolute Count	50.106	98	0.999985
ieu-b-85.vcf	ebi-a-GCST90001596	CD8dim T cell Absolute Count	51.1528	99	0.999982
ieu-b-85.vcf	ebi-a-GCST90001871	HVEM on T cell	11.5916	55	1
ieu-b-85.vcf	ebi-a-GCST90001871	HVEM on T cell	11.6957	56	1
ieu-b-85.vcf	ebi-a-GCST90002025	CD4 on Effector Memory CD4+ T cell	36.1142	82	0.999998
ieu-b-85.vcf	ebi-a-GCST90002025	CD4 on Effector Memory CD4+ T cell	36.1193	83	0.999998
ieu-b-85.vcf	ebi-a-GCST90002121	CD8 on CD39+ CD8+ T cell	39.4432	94	1
ieu-b-85.vcf	ebi-a-GCST90002121	CD8 on CD39+ CD8+ T cell	39.4454	95	1
ieu-b-85.vcf	ebi-a-GCST90001491	CD39+ activated CD4 regulatory T cell %CD4 regulatory T cell	48.278	98	0.999994
ieu-b-85.vcf	ebi-a-GCST90001491	CD39+ activated CD4 regulatory T cell %CD4 regulatory T cell	48.3337	99	0.999996
ieu-b-85.vcf	ebi-a-GCST90001535	CD45RA- CD4+ T cell %CD4+ T cell	39.3047	91	1
ieu-b-85.vcf	ebi-a-GCST90001535	CD45RA- CD4+ T cell %CD4+ T cell	39.3056	92	1
ieu-b-85.vcf	ebi-a-GCST90001818	CD38 on IgD+ B cell	46.4121	83	0.999611
ieu-b-85.vcf	ebi-a-GCST90001818	CD38 on IgD+ B cell	46.9633	84	0.99964
ieu-b-85.vcf	ebi-a-GCST90001917	CD45 on CD8+ T cell	39.305	96	1
ieu-b-85.vcf	ebi-a-GCST90001917	CD45 on CD8+ T cell	39.3985	97	1
ieu-b-85.vcf	ebi-a-GCST90001959	CD4 on HLA DR+ CD4+ T cell	49.8663	84	0.998879
ieu-b-85.vcf	ebi-a-GCST90001959	CD4 on HLA DR+ CD4+ T cell	50.1692	85	0.999054
ieu-b-85.vcf	ebi-a-GCST90002085	SSC-A on HLA DR+ CD4+ T cell	55.9372	92	0.998913
ieu-b-85.vcf	ebi-a-GCST90002085	SSC-A on HLA DR+ CD4+ T cell	55.967	93	0.999162
ieu-b-85.vcf	ebi-a-GCST90001983	CD14 on CD14+ CD16+ monocyte	44.0584	90	0.999988
ieu-b-85.vcf	ebi-a-GCST90001983	CD14 on CD14+ CD16+ monocyte	44.3101	91	0.999991
ieu-b-85.vcf	ebi-a-GCST90001635	CD8dim Natural Killer T %lymphocyte	42.1335	88	0.999991
ieu-b-85.vcf	ebi-a-GCST90001635	CD8dim Natural Killer T %lymphocyte	42.4336	89	0.999993
ieu-b-85.vcf	ebi-a-GCST90001861	CD3 on CD28+ CD4+ T cell	37.5458	92	1
ieu-b-85.vcf	ebi-a-GCST90001861	CD3 on CD28+ CD4+ T cell	37.9418	93	1
ieu-b-85.vcf	ebi-a-GCST90001783	CD25 on IgD+ CD38+ B cell	44.843	84	0.999858
ieu-b-85.vcf	ebi-a-GCST90001783	CD25 on IgD+ CD38+ B cell	45.6948	85	0.999849
ieu-b-85.vcf	ebi-a-GCST90001503	Activated & secreting CD4 regulatory T cell %CD4+ T cell	57.2624	102	0.999898
ieu-b-85.vcf	ebi-a-GCST90001503	Activated & secreting CD4 regulatory T cell %CD4+ T cell	57.9097	103	0.999901
ieu-b-85.vcf	ebi-a-GCST90001551	Naive CD8+ T cell Absolute Count	49.0116	87	0.999666
ieu-b-85.vcf	ebi-a-GCST90001551	Naive CD8+ T cell Absolute Count	51.6924	88	0.999288
ieu-b-85.vcf	ebi-a-GCST90001759	CD20 on naive-mature B cell	41.5523	92	0.999999
ieu-b-85.vcf	ebi-a-GCST90001759	CD20 on naive-mature B cell	41.6133	93	0.999999
ieu-b-85.vcf	ebi-a-GCST90001482	Resting CD4 regulatory T cell %CD4+ T cell	37.1423	87	0.999999
ieu-b-85.vcf	ebi-a-GCST90001482	Resting CD4 regulatory T cell %CD4+ T cell	37.2649	88	1
ieu-b-85.vcf	ebi-a-GCST90002075	SSC-A on B cell	41.5117	92	0.999999
ieu-b-85.vcf	ebi-a-GCST90002075	SSC-A on B cell	43.2206	93	0.999998
ieu-b-85.vcf	ebi-a-GCST90001873	HVEM on Effector Memory CD8+ T cell	15.7389	60	1
ieu-b-85.vcf	ebi-a-GCST90001873	HVEM on Effector Memory CD8+ T cell	15.7865	61	1
ieu-b-85.vcf	ebi-a-GCST90002055	CD8 on naive CD8+ T cell	33.9466	80	0.999999
ieu-b-85.vcf	ebi-a-GCST90002055	CD8 on naive CD8+ T cell	33.9598	81	0.999999
ieu-b-85.vcf	ebi-a-GCST90001997	CX3CR1 on CD14+ CD16- monocyte	50.4382	87	0.99941
ieu-b-85.vcf	ebi-a-GCST90001997	CX3CR1 on CD14+ CD16- monocyte	51.5644	88	0.999321
ieu-b-85.vcf	ebi-a-GCST90002109	HLA DR on CD33+ HLA DR+ CD14dim	19.6613	79	1
ieu-b-85.vcf	ebi-a-GCST90002109	HLA DR on CD33+ HLA DR+ CD14dim	19.69	80	1
ieu-b-85.vcf	ebi-a-GCST90001915	CD45 on T cell	36.8168	93	1
ieu-b-85.vcf	ebi-a-GCST90001915	CD45 on T cell	37.2595	94	1
ieu-b-85.vcf	ebi-a-GCST90001524	Granulocytic Myeloid-Derived Suppressor Cells Absolute Count	23.9129	73	1
ieu-b-85.vcf	ebi-a-GCST90001524	Granulocytic Myeloid-Derived Suppressor Cells Absolute Count	24.0736	74	1
ieu-b-85.vcf	ebi-a-GCST90001931	CD127 on CD4+ T cell	12.2948	23	0.965667
ieu-b-85.vcf	ebi-a-GCST90001931	CD127 on CD4+ T cell	12.3105	24	0.976179
ieu-b-85.vcf	ebi-a-GCST90001930	CD127 on CD28- CD8+ T cell	32.9298	78	0.999998
ieu-b-85.vcf	ebi-a-GCST90001930	CD127 on CD28- CD8+ T cell	35.6297	79	0.999994
ieu-b-85.vcf	ebi-a-GCST90001755	CD20 on IgD- CD38- B cell	35.4231	91	1
ieu-b-85.vcf	ebi-a-GCST90001755	CD20 on IgD- CD38- B cell	35.4241	92	1
ieu-b-85.vcf	ebi-a-GCST90002116	HLA DR on B cell	38.4902	80	0.999976
ieu-b-85.vcf	ebi-a-GCST90002116	HLA DR on B cell	38.6934	81	0.999982
ieu-b-85.vcf	ebi-a-GCST90001512	CD25++ CD45RA- CD4 not regulatory T cell %T cell	34.4249	90	1
ieu-b-85.vcf	ebi-a-GCST90001512	CD25++ CD45RA- CD4 not regulatory T cell %T cell	34.4314	91	1
ieu-b-85.vcf	ebi-a-GCST90001605	T cell %leukocyte	38.0586	90	1
ieu-b-85.vcf	ebi-a-GCST90001605	T cell %leukocyte	38.6378	91	1
ieu-b-85.vcf	ebi-a-GCST90002103	CD45RA on CD39+ resting CD4 regulatory T cell	8.12601	20	0.991001
ieu-b-85.vcf	ebi-a-GCST90002103	CD45RA on CD39+ resting CD4 regulatory T cell	8.15302	21	0.994461
ieu-b-85.vcf	ebi-a-GCST90001613	CD4-CD8- T cell %leukocyte	47.9161	96	0.99999
ieu-b-85.vcf	ebi-a-GCST90001613	CD4-CD8- T cell %leukocyte	48.2193	97	0.999992
ieu-b-85.vcf	ebi-a-GCST90001636	CD4-CD8- Natural Killer T Absolute Count	14.9516	23	0.896358
ieu-b-85.vcf	ebi-a-GCST90001636	CD4-CD8- Natural Killer T Absolute Count	15.2416	24	0.913491
ieu-b-85.vcf	ebi-a-GCST90001936	CD25 on CD4 regulatory T cell	45.6202	89	0.999962
ieu-b-85.vcf	ebi-a-GCST90001936	CD25 on CD4 regulatory T cell	46.8331	90	0.999952
ieu-b-85.vcf	ebi-a-GCST90001543	Effector Memory CD4+ T cell %CD4+ T cell	35.287	90	1
ieu-b-85.vcf	ebi-a-GCST90001543	Effector Memory CD4+ T cell %CD4+ T cell	35.2875	91	1
ieu-b-85.vcf	ebi-a-GCST90001840	CD3 on Terminally Differentiated CD8+ T cell	34.0176	87	1
ieu-b-85.vcf	ebi-a-GCST90001840	CD3 on Terminally Differentiated CD8+ T cell	34.1834	88	1
ieu-b-85.vcf	ebi-a-GCST90001640	CD3- lymphocyte %lymphocyte	24.5838	45	0.994333
ieu-b-85.vcf	ebi-a-GCST90001640	CD3- lymphocyte %lymphocyte	25.7912	46	0.993028
ieu-b-85.vcf	ebi-a-GCST90001789	CD25 on IgD- CD38dim B cell	50.0541	91	0.99985
ieu-b-85.vcf	ebi-a-GCST90001789	CD25 on IgD- CD38dim B cell	50.0627	92	0.999891
ieu-b-85.vcf	ebi-a-GCST90001928	CD127 on CD28+ CD45RA- CD8+ T cell	54.7689	90	0.99876
ieu-b-85.vcf	ebi-a-GCST90001928	CD127 on CD28+ CD45RA- CD8+ T cell	56.1261	91	0.998491
ieu-b-85.vcf	ebi-a-GCST90001753	CD20 on IgD- CD24- B cell	41.947	95	1
ieu-b-85.vcf	ebi-a-GCST90001753	CD20 on IgD- CD24- B cell	41.9961	96	1
ieu-b-85.vcf	ebi-a-GCST90001844	CD3 on Terminally Differentiated CD4+ T cell	39.8483	86	0.999995
ieu-b-85.vcf	ebi-a-GCST90001844	CD3 on Terminally Differentiated CD4+ T cell	41.5357	87	0.999991
ieu-b-85.vcf	ebi-a-GCST90001839	CD3 on Effector Memory CD8+ T cell	36.2795	87	1
ieu-b-85.vcf	ebi-a-GCST90001839	CD3 on Effector Memory CD8+ T cell	36.4628	88	1
ieu-b-85.vcf	ebi-a-GCST90001676	CD28- CD25++ CD8+ T cell %T cell	6.87986	20	0.997061
ieu-b-85.vcf	ebi-a-GCST90001676	CD28- CD25++ CD8+ T cell %T cell	7.24099	21	0.997617
ieu-b-85.vcf	ebi-a-GCST90001643	B cell %CD3- lymphocyte	66.4135	99	0.995129
ieu-b-85.vcf	ebi-a-GCST90001643	B cell %CD3- lymphocyte	66.6652	100	0.995821
ieu-b-85.vcf	ebi-a-GCST90001974	FSC-A on CD8+ T cell	45.9107	92	0.999985
ieu-b-85.vcf	ebi-a-GCST90001974	FSC-A on CD8+ T cell	46.0623	93	0.999989
ieu-b-85.vcf	ebi-a-GCST90001981	CD40 on CD14+ CD16+ monocyte	38.3607	100	1
ieu-b-85.vcf	ebi-a-GCST90001981	CD40 on CD14+ CD16+ monocyte	38.4347	101	1
ieu-b-85.vcf	ebi-a-GCST90001485	CD39+ resting CD4 regulatory T cell %CD4 regulatory T cell	45.325	98	0.999999
ieu-b-85.vcf	ebi-a-GCST90001485	CD39+ resting CD4 regulatory T cell %CD4 regulatory T cell	45.8857	99	0.999999
ieu-b-85.vcf	ebi-a-GCST90001628	HLA DR+ CD8+ T cell %T cell	67.3085	100	0.995025
ieu-b-85.vcf	ebi-a-GCST90001628	HLA DR+ CD8+ T cell %T cell	67.9071	101	0.995309
ieu-b-85.vcf	ebi-a-GCST90001661	CD28- CD8dim T cell %T cell	52.6029	94	0.999827
ieu-b-85.vcf	ebi-a-GCST90001661	CD28- CD8dim T cell %T cell	53.6371	95	0.999805
ieu-b-85.vcf	ebi-a-GCST90001850	CD3 on HLA DR+ CD8+ T cell	34.5452	94	1
ieu-b-85.vcf	ebi-a-GCST90001850	CD3 on HLA DR+ CD8+ T cell	34.6382	95	1
ieu-b-85.vcf	ebi-a-GCST90002043	CD45 on CD33+ HLA DR+ CD14dim	21.2048	66	1
ieu-b-85.vcf	ebi-a-GCST90002043	CD45 on CD33+ HLA DR+ CD14dim	21.3868	67	1
ieu-b-85.vcf	ebi-a-GCST90001490	CD39+ activated CD4 regulatory T cell %activated CD4 regulatory T cell	14.5088	31	0.99484
ieu-b-85.vcf	ebi-a-GCST90001490	CD39+ activated CD4 regulatory T cell %activated CD4 regulatory T cell	14.53	32	0.996573
ieu-b-85.vcf	ebi-a-GCST90001584	CD14- CD16+ monocyte %monocyte	39.1047	96	1
ieu-b-85.vcf	ebi-a-GCST90001584	CD14- CD16+ monocyte %monocyte	39.1155	97	1
ieu-b-85.vcf	ebi-a-GCST90001991	HLA DR on CD14+ monocyte	39.8824	90	0.999999
ieu-b-85.vcf	ebi-a-GCST90001991	HLA DR on CD14+ monocyte	40.4626	91	0.999999
ieu-b-85.vcf	ebi-a-GCST90001793	CD25 on switched memory B cell	46.4237	91	0.999972
ieu-b-85.vcf	ebi-a-GCST90001793	CD25 on switched memory B cell	46.5636	92	0.999979
ieu-b-85.vcf	ebi-a-GCST90001444	CD20- CD38- B cell %lymphocyte	46.2368	89	0.999949
ieu-b-85.vcf	ebi-a-GCST90001444	CD20- CD38- B cell %lymphocyte	46.693	90	0.999955
ieu-b-85.vcf	ebi-a-GCST90001734	CD19 on IgD- CD38+ B cell	44.0465	87	0.999966
ieu-b-85.vcf	ebi-a-GCST90001734	CD19 on IgD- CD38+ B cell	44.0744	88	0.999976
ieu-b-85.vcf	ebi-a-GCST90001462	CD62L- Dendritic Cell Absolute Count	39.609	96	1
ieu-b-85.vcf	ebi-a-GCST90001462	CD62L- Dendritic Cell Absolute Count	39.843	97	1
ieu-b-85.vcf	ebi-a-GCST90001690	CD28+ CD45RA+ CD8+ T cell Absolute Count	51.3983	91	0.999737
ieu-b-85.vcf	ebi-a-GCST90001690	CD28+ CD45RA+ CD8+ T cell Absolute Count	53.4455	92	0.999561
ieu-b-85.vcf	ebi-a-GCST90001794	CD25 on IgD+ B cell	48.5341	88	0.999799
ieu-b-85.vcf	ebi-a-GCST90001794	CD25 on IgD+ B cell	49.1258	89	0.999811
ieu-b-85.vcf	ebi-a-GCST90001747	CD20 on IgD+ CD24- B cell	43.9851	93	0.999996
ieu-b-85.vcf	ebi-a-GCST90001747	CD20 on IgD+ CD24- B cell	44.0805	94	0.999997
ieu-b-85.vcf	ebi-a-GCST90001606	CD4+ T cell %leukocyte	37.3472	94	1
ieu-b-85.vcf	ebi-a-GCST90001606	CD4+ T cell %leukocyte	37.5316	95	1
ieu-b-85.vcf	ebi-a-GCST90001521	CD33+ HLA DR+ CD14dim %CD33+ HLA DR+	25.7038	70	1
ieu-b-85.vcf	ebi-a-GCST90001521	CD33+ HLA DR+ CD14dim %CD33+ HLA DR+	25.779	71	1
ieu-b-85.vcf	ebi-a-GCST90002118	CD8 on CD28+ CD45RA- CD8+ T cell	39.7668	89	0.999999
ieu-b-85.vcf	ebi-a-GCST90002118	CD8 on CD28+ CD45RA- CD8+ T cell	40.0039	90	0.999999
ieu-b-85.vcf	ebi-a-GCST90001893	CD28 on CD28+ CD45RA- CD8+ T cell	36.8308	97	1
ieu-b-85.vcf	ebi-a-GCST90001893	CD28 on CD28+ CD45RA- CD8+ T cell	36.8322	98	1
ieu-b-85.vcf	ebi-a-GCST90001657	CD28+ CD4-CD8- T cell Absolute Count	40.7386	81	0.999946
ieu-b-85.vcf	ebi-a-GCST90001657	CD28+ CD4-CD8- T cell Absolute Count	41.3608	82	0.999948
ieu-b-85.vcf	ebi-a-GCST90001689	CD28+ CD45RA+ CD8+ T cell %CD8+ T cell	56.1295	89	0.997478
ieu-b-85.vcf	ebi-a-GCST90001689	CD28+ CD45RA+ CD8+ T cell %CD8+ T cell	56.1295	90	0.998043
ieu-b-85.vcf	ebi-a-GCST90002102	CD45RA on resting CD4 regulatory T cell	54.6027	91	0.999108
ieu-b-85.vcf	ebi-a-GCST90002102	CD45RA on resting CD4 regulatory T cell	54.9241	92	0.99924
ieu-b-85.vcf	ebi-a-GCST90001627	HLA DR+ CD8+ T cell Absolute Count	56.4582	100	0.999865
ieu-b-85.vcf	ebi-a-GCST90001627	HLA DR+ CD8+ T cell Absolute Count	58.2007	101	0.999799
ieu-b-85.vcf	ebi-a-GCST90001895	CD28 on CD28+ CD4-CD8- T cell	0.767854	2	0.681181
ieu-b-85.vcf	ebi-a-GCST90001895	CD28 on CD28+ CD4-CD8- T cell	1.27808	3	0.734344
ieu-b-85.vcf	ebi-a-GCST90001666	CD28+ CD45RA+ CD8dim T cell Absolute Count	41.2952	88	0.999995
ieu-b-85.vcf	ebi-a-GCST90001666	CD28+ CD45RA+ CD8dim T cell Absolute Count	41.359	89	0.999996
ieu-b-85.vcf	ebi-a-GCST90002004	CCR2 on CD14+ CD16- monocyte	53.1612	93	0.999707
ieu-b-85.vcf	ebi-a-GCST90002004	CCR2 on CD14+ CD16- monocyte	53.2289	94	0.999777
ieu-b-85.vcf	ebi-a-GCST90001711	BAFF-R on IgD- CD27- B cell	49.8709	92	0.9999
ieu-b-85.vcf	ebi-a-GCST90001711	BAFF-R on IgD- CD27- B cell	50.0371	93	0.999922
ieu-b-85.vcf	ebi-a-GCST90001824	IgD on IgD+ CD38+ B cell	46.7084	91	0.999968
ieu-b-85.vcf	ebi-a-GCST90001824	IgD on IgD+ CD38+ B cell	47.4306	92	0.999968
ieu-b-85.vcf	ebi-a-GCST90001898	CD28 on CD4+ T cell	34.1571	89	1
ieu-b-85.vcf	ebi-a-GCST90001898	CD28 on CD4+ T cell	34.4604	90	1
ieu-b-85.vcf	ebi-a-GCST90001516	Immature Myeloid-Derived Suppressor Cells %CD33dim HLA DR- CD66b-	24.53	77	1
ieu-b-85.vcf	ebi-a-GCST90001516	Immature Myeloid-Derived Suppressor Cells %CD33dim HLA DR- CD66b-	25.7206	78	1
ieu-b-85.vcf	ebi-a-GCST90001552	Naive CD8+ T cell %CD8+ T cell	64.938	99	0.996768
ieu-b-85.vcf	ebi-a-GCST90001552	Naive CD8+ T cell %CD8+ T cell	65.0268	100	0.997373
ieu-b-85.vcf	ebi-a-GCST90001978	FSC-A on HLA DR+ CD8+ T cell	33.8212	86	1
ieu-b-85.vcf	ebi-a-GCST90001978	FSC-A on HLA DR+ CD8+ T cell	33.8468	87	1
ieu-b-85.vcf	ebi-a-GCST90001675	CD28- CD127- CD25++ CD8+ T cell Absolute Count	35.203	85	1
ieu-b-85.vcf	ebi-a-GCST90001675	CD28- CD127- CD25++ CD8+ T cell Absolute Count	35.7675	86	1
ieu-b-85.vcf	ebi-a-GCST90001637	CD4-CD8- Natural Killer T %T cell	45.1547	93	0.999993
ieu-b-85.vcf	ebi-a-GCST90001637	CD4-CD8- Natural Killer T %T cell	45.7116	94	0.999994
ieu-b-85.vcf	ebi-a-GCST90001904	CD86 on CD62L+ myeloid Dendritic Cell	36.3689	93	1
ieu-b-85.vcf	ebi-a-GCST90001904	CD86 on CD62L+ myeloid Dendritic Cell	36.4757	94	1
ieu-b-85.vcf	ebi-a-GCST90001885	CD16-CD56 on HLA DR+ Natural Killer	39.0779	95	1
ieu-b-85.vcf	ebi-a-GCST90001885	CD16-CD56 on HLA DR+ Natural Killer	39.1654	96	1
ieu-b-85.vcf	ebi-a-GCST90001426	IgD- CD38dim B cell %lymphocyte	49.8192	91	0.999865
ieu-b-85.vcf	ebi-a-GCST90001426	IgD- CD38dim B cell %lymphocyte	50.1449	92	0.999887
ieu-b-85.vcf	ebi-a-GCST90001576	Transitional B cell %B cell	43.1259	95	0.999999
ieu-b-85.vcf	ebi-a-GCST90001576	Transitional B cell %B cell	43.1554	96	0.999999
ieu-b-85.vcf	ebi-a-GCST90002022	CD4 on CD4+ T cell	30.445	79	1
ieu-b-85.vcf	ebi-a-GCST90002022	CD4 on CD4+ T cell	30.5398	80	1
ieu-b-85.vcf	ebi-a-GCST90001700	CD45RA+ CD28- CD8+ T cell %T cell	42.1144	92	0.999998
ieu-b-85.vcf	ebi-a-GCST90001700	CD45RA+ CD28- CD8+ T cell %T cell	43.9378	93	0.999997
ieu-b-85.vcf	ebi-a-GCST90001713	BAFF-R on IgD- CD38+ B cell	40.6182	99	1
ieu-b-85.vcf	ebi-a-GCST90001713	BAFF-R on IgD- CD38+ B cell	40.6347	100	1
ieu-b-85.vcf	ebi-a-GCST90001450	CD62L- monocyte Absolute Count	39.3965	84	0.999992
ieu-b-85.vcf	ebi-a-GCST90001450	CD62L- monocyte Absolute Count	40.5617	85	0.999989
ieu-b-85.vcf	ebi-a-GCST90001418	CD24+ CD27+ B cell Absolute Count	38.7493	94	1
ieu-b-85.vcf	ebi-a-GCST90001418	CD24+ CD27+ B cell Absolute Count	38.767	95	1
ieu-b-85.vcf	ebi-a-GCST90001992	CCR2 on CD14+ CD16+ monocyte	53.6686	87	0.998114
ieu-b-85.vcf	ebi-a-GCST90001992	CCR2 on CD14+ CD16+ monocyte	54.351	88	0.998175
ieu-b-85.vcf	ebi-a-GCST90001777	CD25 on CD24+ CD27+ B cell	41.6544	87	0.99999
ieu-b-85.vcf	ebi-a-GCST90001777	CD25 on CD24+ CD27+ B cell	42.2053	88	0.999991
ieu-b-85.vcf	ebi-a-GCST90002090	CD11c on granulocyte	41.9064	85	0.999977
ieu-b-85.vcf	ebi-a-GCST90002090	CD11c on granulocyte	42.8022	86	0.999974
ieu-b-85.vcf	ebi-a-GCST90001879	HVEM on Terminally Differentiated CD4+ T cell	16.9181	65	1
ieu-b-85.vcf	ebi-a-GCST90001879	HVEM on Terminally Differentiated CD4+ T cell	16.9311	66	1
ieu-b-85.vcf	ebi-a-GCST90001423	CD20- CD38- B cell Absolute Count	50.3582	92	0.999876
ieu-b-85.vcf	ebi-a-GCST90001423	CD20- CD38- B cell Absolute Count	50.6162	93	0.999899
ieu-b-85.vcf	ebi-a-GCST90001510	CD25++ CD45RA- CD4 not regulatory T cell Absolute Count	36.3757	94	1
ieu-b-85.vcf	ebi-a-GCST90001510	CD25++ CD45RA- CD4 not regulatory T cell Absolute Count	36.7608	95	1
ieu-b-85.vcf	ebi-a-GCST90001559	Terminally Differentiated CD8+ T cell %T cell	52.348	92	0.999715
ieu-b-85.vcf	ebi-a-GCST90001559	Terminally Differentiated CD8+ T cell %T cell	53.2461	93	0.999697
ieu-b-85.vcf	ebi-a-GCST90001906	CD86 on granulocyte	35.8619	84	0.999999
ieu-b-85.vcf	ebi-a-GCST90001906	CD86 on granulocyte	36.0217	85	0.999999
ieu-b-85.vcf	ebi-a-GCST90001901	CD28 on CD39+ resting CD4 regulatory T cell	30.6558	83	1
ieu-b-85.vcf	ebi-a-GCST90001901	CD28 on CD39+ resting CD4 regulatory T cell	32.8505	84	1
ieu-b-85.vcf	ebi-a-GCST90002000	PDL-1 on CD14- CD16-	33.0471	86	1
ieu-b-85.vcf	ebi-a-GCST90002000	PDL-1 on CD14- CD16-	33.1423	87	1
ieu-b-85.vcf	ebi-a-GCST90002059	CD8 on Natural Killer T	37.9002	91	1
ieu-b-85.vcf	ebi-a-GCST90002059	CD8 on Natural Killer T	38.5979	92	1
ieu-b-85.vcf	ebi-a-GCST90001855	CD3 on secreting CD4 regulatory T cell	33.5076	87	1
ieu-b-85.vcf	ebi-a-GCST90001855	CD3 on secreting CD4 regulatory T cell	34.365	88	1
ieu-b-85.vcf	ebi-a-GCST90001415	IgD+ CD24- B cell %B cell	44.5679	89	0.999978
ieu-b-85.vcf	ebi-a-GCST90001415	IgD+ CD24- B cell %B cell	45.0074	90	0.999981
ieu-b-85.vcf	ebi-a-GCST90001593	CD8+ T cell %T cell	54.6166	94	0.999615
ieu-b-85.vcf	ebi-a-GCST90001593	CD8+ T cell %T cell	54.6846	95	0.999704
ieu-b-85.vcf	ebi-a-GCST90001612	CD8dim T cell %leukocyte	50.4661	93	0.999905
ieu-b-85.vcf	ebi-a-GCST90001612	CD8dim T cell %leukocyte	50.4679	94	0.999931
ieu-b-85.vcf	ebi-a-GCST90001699	CD45RA+ CD28- CD8+ T cell %CD8+ T cell	44.5421	91	0.99999
ieu-b-85.vcf	ebi-a-GCST90001699	CD45RA+ CD28- CD8+ T cell %CD8+ T cell	47.6498	92	0.999964
ieu-b-85.vcf	ebi-a-GCST90001799	CD27 on T cell	31.6487	77	0.999999
ieu-b-85.vcf	ebi-a-GCST90001799	CD27 on T cell	31.7686	78	0.999999
ieu-b-85.vcf	ebi-a-GCST90002001	CD64 on CD14- CD16-	45.8334	93	0.99999
ieu-b-85.vcf	ebi-a-GCST90002001	CD64 on CD14- CD16-	47.414	94	0.999984
ieu-b-85.vcf	ebi-a-GCST90001396	IgD+ CD38- B cell Absolute Count	38.0227	90	1
ieu-b-85.vcf	ebi-a-GCST90001396	IgD+ CD38- B cell Absolute Count	38.0791	91	1
ieu-b-85.vcf	ebi-a-GCST90001574	Terminally Differentiated CD4-CD8- T cell %T cell	38.6156	86	0.999998
ieu-b-85.vcf	ebi-a-GCST90001574	Terminally Differentiated CD4-CD8- T cell %T cell	38.6399	87	0.999998
ieu-b-85.vcf	ebi-a-GCST90001497	CD39+ secreting CD4 regulatory T cell %CD4 regulatory T cell	27.1323	88	1
ieu-b-85.vcf	ebi-a-GCST90001497	CD39+ secreting CD4 regulatory T cell %CD4 regulatory T cell	28.0393	89	1
ieu-b-85.vcf	ebi-a-GCST90001802	CD27 on IgD- CD38- B cell	50.0676	92	0.99989
ieu-b-85.vcf	ebi-a-GCST90001802	CD27 on IgD- CD38- B cell	50.3481	93	0.99991
ieu-b-85.vcf	ebi-a-GCST90002076	SSC-A on Natural Killer	32.8989	92	1
ieu-b-85.vcf	ebi-a-GCST90002076	SSC-A on Natural Killer	33.2157	93	1
ieu-b-85.vcf	ebi-a-GCST90001653	CD28- CD4-CD8- T cell %CD4-CD8- T cell	37.0178	87	0.999999
ieu-b-85.vcf	ebi-a-GCST90001653	CD28- CD4-CD8- T cell %CD4-CD8- T cell	41.2619	88	0.999995
ieu-b-85.vcf	ebi-a-GCST90001775	CD25 on B cell	44.5633	88	0.999969
ieu-b-85.vcf	ebi-a-GCST90001775	CD25 on B cell	45.106	89	0.999971
ieu-b-85.vcf	ebi-a-GCST90001797	CD27 on CD20- CD38- B cell	38.5311	91	1
ieu-b-85.vcf	ebi-a-GCST90001797	CD27 on CD20- CD38- B cell	38.6965	92	1
ieu-b-85.vcf	ebi-a-GCST90001767	CD24 on IgD+ CD38- unswitched memory B cell	33.331	78	0.999998
ieu-b-85.vcf	ebi-a-GCST90001767	CD24 on IgD+ CD38- unswitched memory B cell	33.5837	79	0.999998
ieu-b-85.vcf	ebi-a-GCST90001964	FSC-A on plasmacytoid Dendritic Cell	40.9995	81	0.999938
ieu-b-85.vcf	ebi-a-GCST90001964	FSC-A on plasmacytoid Dendritic Cell	41.0359	82	0.999956
ieu-b-85.vcf	ebi-a-GCST90001456	CD11c+ HLA DR++ monocyte Absolute Count	41.0497	85	0.999985
ieu-b-85.vcf	ebi-a-GCST90001456	CD11c+ HLA DR++ monocyte Absolute Count	41.1272	86	0.99999
ieu-b-85.vcf	ebi-a-GCST90001962	CD25 on CD28+ CD4+ T cell	10.5827	24	0.991691
ieu-b-85.vcf	ebi-a-GCST90001962	CD25 on CD28+ CD4+ T cell	11.1873	25	0.991984
ieu-b-85.vcf	ebi-a-GCST90001832	CD62L on CD62L+ plasmacytoid Dendritic Cell	34.6944	83	0.999999
ieu-b-85.vcf	ebi-a-GCST90001832	CD62L on CD62L+ plasmacytoid Dendritic Cell	35.0949	84	0.999999
ieu-b-85.vcf	ebi-a-GCST90001719	BAFF-R on IgD+ B cell	51.3768	91	0.999739
ieu-b-85.vcf	ebi-a-GCST90001719	BAFF-R on IgD+ B cell	51.3959	92	0.999807
ieu-b-85.vcf	ebi-a-GCST90001994	CX3CR1 on CD14- CD16-	41.039	93	0.999999
ieu-b-85.vcf	ebi-a-GCST90001994	CX3CR1 on CD14- CD16-	41.2783	94	1
ieu-b-85.vcf	ebi-a-GCST90001995	CX3CR1 on monocyte	47.8653	85	0.999616
ieu-b-85.vcf	ebi-a-GCST90001995	CX3CR1 on monocyte	49.8499	86	0.999371
ieu-b-85.vcf	ebi-a-GCST90001905	CD86 on monocyte	27.3351	86	1
ieu-b-85.vcf	ebi-a-GCST90001905	CD86 on monocyte	28.0902	87	1
ieu-b-85.vcf	ebi-a-GCST90001702	BAFF-R on CD24+ CD27+ B cell	42.8577	89	0.999991
ieu-b-85.vcf	ebi-a-GCST90001702	BAFF-R on CD24+ CD27+ B cell	42.9649	90	0.999994
ieu-b-85.vcf	ebi-a-GCST90001471	CD62L- plasmacytoid Dendritic Cell %Dendritic Cell	46.0126	91	0.999977
ieu-b-85.vcf	ebi-a-GCST90001471	CD62L- plasmacytoid Dendritic Cell %Dendritic Cell	46.2398	92	0.999982
ieu-b-85.vcf	ebi-a-GCST90002050	CD45 on CD33dim HLA DR-	21.9433	60	0.999998
ieu-b-85.vcf	ebi-a-GCST90002050	CD45 on CD33dim HLA DR-	23.3433	61	0.999997
ieu-b-85.vcf	ebi-a-GCST90001718	BAFF-R on switched memory B cell	43.2143	88	0.999984
ieu-b-85.vcf	ebi-a-GCST90001718	BAFF-R on switched memory B cell	43.8506	89	0.999985
ieu-b-85.vcf	ebi-a-GCST90001632	CD8+ Natural Killer T %lymphocyte	49.4703	93	0.99994
ieu-b-85.vcf	ebi-a-GCST90001632	CD8+ Natural Killer T %lymphocyte	50.9777	94	0.999914
ieu-b-85.vcf	ebi-a-GCST90001564	Central Memory CD4-CD8- T cell %CD4-CD8- T cell	39.6875	98	1
ieu-b-85.vcf	ebi-a-GCST90001564	Central Memory CD4-CD8- T cell %CD4-CD8- T cell	40.1583	99	1
ieu-b-85.vcf	ebi-a-GCST90001400	IgD+ B cell Absolute Count	46.317	90	0.999963
ieu-b-85.vcf	ebi-a-GCST90001400	IgD+ B cell Absolute Count	46.3474	91	0.999973
ieu-b-85.vcf	ebi-a-GCST90001999	PDL-1 on CD14- CD16+ monocyte	45.7626	92	0.999986
ieu-b-85.vcf	ebi-a-GCST90001999	PDL-1 on CD14- CD16+ monocyte	45.971	93	0.999989
ieu-b-85.vcf	ebi-a-GCST90001776	CD25 on CD20- CD38- B cell	43.8275	88	0.999979
ieu-b-85.vcf	ebi-a-GCST90001776	CD25 on CD20- CD38- B cell	43.8365	89	0.999985
ieu-b-85.vcf	ebi-a-GCST90001740	CD19 on switched memory B cell	35.9981	90	1
ieu-b-85.vcf	ebi-a-GCST90001740	CD19 on switched memory B cell	36.6364	91	1
ieu-b-85.vcf	ebi-a-GCST90001947	CD33 on CD33+ HLA DR+ CD14dim	21.8177	76	1
ieu-b-85.vcf	ebi-a-GCST90001947	CD33 on CD33+ HLA DR+ CD14dim	23.4572	77	1
ieu-b-85.vcf	ebi-a-GCST90001909	CD45 on CD14+ monocyte	39.4653	78	0.999917
ieu-b-85.vcf	ebi-a-GCST90001909	CD45 on CD14+ monocyte	39.665	79	0.999936
ieu-b-85.vcf	ebi-a-GCST90001473	CD62L- CD86+ myeloid Dendritic Cell %Dendritic Cell	38.902	93	1
ieu-b-85.vcf	ebi-a-GCST90001473	CD62L- CD86+ myeloid Dendritic Cell %Dendritic Cell	39.6897	94	1
ieu-b-85.vcf	ebi-a-GCST90002045	CD45 on CD33- HLA DR-	18.2086	73	1
ieu-b-85.vcf	ebi-a-GCST90002045	CD45 on CD33- HLA DR-	18.2174	74	1
ieu-b-85.vcf	ebi-a-GCST90002046	CD45 on CD33- HLA DR+	24.4983	73	1
ieu-b-85.vcf	ebi-a-GCST90002046	CD45 on CD33- HLA DR+	25.4529	74	1
ieu-b-85.vcf	ebi-a-GCST90002068	CD4 on secreting CD4 regulatory T cell	38.6083	87	0.999998
ieu-b-85.vcf	ebi-a-GCST90002068	CD4 on secreting CD4 regulatory T cell	39.0638	88	0.999999
ieu-b-85.vcf	ebi-a-GCST90001514	Hematopoietic Stem Cell Absolute Count	25.0783	81	1
ieu-b-85.vcf	ebi-a-GCST90001514	Hematopoietic Stem Cell Absolute Count	25.2721	82	1
ieu-b-85.vcf	ebi-a-GCST90002065	CD4 on CD39+ resting CD4 regulatory T cell	39.1699	75	0.999795
ieu-b-85.vcf	ebi-a-GCST90002065	CD4 on CD39+ resting CD4 regulatory T cell	39.2005	76	0.999853
ieu-b-85.vcf	ebi-a-GCST90002101	CD45RA on Terminally Differentiated CD8+ T cell	33.7469	94	1
ieu-b-85.vcf	ebi-a-GCST90002101	CD45RA on Terminally Differentiated CD8+ T cell	33.8042	95	1
ieu-b-85.vcf	ebi-a-GCST90001779	CD25 on IgD+ CD24- B cell	44.5378	90	0.999985
ieu-b-85.vcf	ebi-a-GCST90001779	CD25 on IgD+ CD24- B cell	44.5555	91	0.999989
ieu-b-85.vcf	ebi-a-GCST90002072	SSC-A on plasmacytoid Dendritic Cell	40.4848	84	0.999984
ieu-b-85.vcf	ebi-a-GCST90002072	SSC-A on plasmacytoid Dendritic Cell	40.5734	85	0.999989
ieu-b-85.vcf	ebi-a-GCST90001511	CD25++ CD45RA- CD4 not regulatory T cell %CD4+ T cell	33.0925	89	1
ieu-b-85.vcf	ebi-a-GCST90001511	CD25++ CD45RA- CD4 not regulatory T cell %CD4+ T cell	33.1742	90	1
ieu-b-85.vcf	ebi-a-GCST90001970	FSC-A on HLA DR+ Natural Killer	30.7179	94	1
ieu-b-85.vcf	ebi-a-GCST90001970	FSC-A on HLA DR+ Natural Killer	31.5397	95	1
ieu-b-85.vcf	ebi-a-GCST90001568	Naive CD4-CD8- T cell %T cell	50.5965	94	0.999927
ieu-b-85.vcf	ebi-a-GCST90001568	Naive CD4-CD8- T cell %T cell	50.612	95	0.999947
ieu-b-85.vcf	ebi-a-GCST90001642	B cell Absolute Count	39.6004	90	0.999999
ieu-b-85.vcf	ebi-a-GCST90001642	B cell Absolute Count	40.5359	91	0.999999
ieu-b-85.vcf	ebi-a-GCST90001837	CD66b on Granulocytic Myeloid-Derived Suppressor Cells	14.4319	67	1
ieu-b-85.vcf	ebi-a-GCST90001837	CD66b on Granulocytic Myeloid-Derived Suppressor Cells	14.4856	68	1
ieu-b-85.vcf	ebi-a-GCST90001827	IgD on IgD+ B cell	51.1542	83	0.997686
ieu-b-85.vcf	ebi-a-GCST90001827	IgD on IgD+ B cell	52.6898	84	0.997034
ieu-b-85.vcf	ebi-a-GCST90001769	CD24 on IgD- CD38- B cell	42.067	90	0.999996
ieu-b-85.vcf	ebi-a-GCST90001769	CD24 on IgD- CD38- B cell	43.5043	91	0.999994
ieu-b-85.vcf	ebi-a-GCST90002018	CCR2 on granulocyte	36.1685	88	1
ieu-b-85.vcf	ebi-a-GCST90002018	CCR2 on granulocyte	37.0844	89	1
ieu-b-85.vcf	ebi-a-GCST90001603	T cell Absolute Count	40.2422	99	1
ieu-b-85.vcf	ebi-a-GCST90001603	T cell Absolute Count	41.6098	100	1
ieu-b-85.vcf	ebi-a-GCST90001677	CD28- CD25++ CD8+ T cell %CD8+ T cell	37.7356	86	0.999999
ieu-b-85.vcf	ebi-a-GCST90001677	CD28- CD25++ CD8+ T cell %CD8+ T cell	38.1984	87	0.999999
ieu-b-85.vcf	ebi-a-GCST90002011	CD64 on CD14+ CD16+ monocyte	43.6701	91	0.999994
ieu-b-85.vcf	ebi-a-GCST90002011	CD64 on CD14+ CD16+ monocyte	43.8731	92	0.999995
ieu-b-85.vcf	ebi-a-GCST90001430	IgD+ CD38dim B cell %lymphocyte	56.4381	96	0.999568
ieu-b-85.vcf	ebi-a-GCST90001430	IgD+ CD38dim B cell %lymphocyte	56.8944	97	0.999614
ieu-b-85.vcf	ebi-a-GCST90001541	Naive CD4+ T cell %CD4+ T cell	36.1998	92	1
ieu-b-85.vcf	ebi-a-GCST90001541	Naive CD4+ T cell %CD4+ T cell	36.3537	93	1
ieu-b-85.vcf	ebi-a-GCST90001735	CD19 on IgD- CD38dim B cell	45.0237	94	0.999996
ieu-b-85.vcf	ebi-a-GCST90001735	CD19 on IgD- CD38dim B cell	45.0651	95	0.999997
ieu-b-85.vcf	ebi-a-GCST90001624	HLA DR+ CD4+ T cell Absolute Count	43.271	87	0.999977
ieu-b-85.vcf	ebi-a-GCST90001624	HLA DR+ CD4+ T cell Absolute Count	44.2714	88	0.999973
ieu-b-85.vcf	ebi-a-GCST90001641	CD3- lymphocyte %leukocyte	50.3146	90	0.999772
ieu-b-85.vcf	ebi-a-GCST90001641	CD3- lymphocyte %leukocyte	50.9287	91	0.999783
ieu-b-85.vcf	ebi-a-GCST90002077	SSC-A on HLA DR+ Natural Killer	35.6162	91	1
ieu-b-85.vcf	ebi-a-GCST90002077	SSC-A on HLA DR+ Natural Killer	35.6167	92	1
ieu-b-85.vcf	ebi-a-GCST90001937	CD25 on resting CD4 regulatory T cell	34.2853	88	1
ieu-b-85.vcf	ebi-a-GCST90001937	CD25 on resting CD4 regulatory T cell	35.4087	89	1
ieu-b-85.vcf	ebi-a-GCST90002039	CD80 on monocyte	36.6404	88	1
ieu-b-85.vcf	ebi-a-GCST90002039	CD80 on monocyte	36.6758	89	1
ieu-b-85.vcf	ebi-a-GCST90001941	CD25 on secreting CD4 regulatory T cell	36.0454	87	1
ieu-b-85.vcf	ebi-a-GCST90001941	CD25 on secreting CD4 regulatory T cell	36.055	88	1
ieu-b-85.vcf	ebi-a-GCST90001562	CD45RA+ CD8+ T cell %T cell	46.5451	99	0.999998
ieu-b-85.vcf	ebi-a-GCST90001562	CD45RA+ CD8+ T cell %T cell	47.2469	100	0.999998
ieu-b-85.vcf	ebi-a-GCST90001845	CD3 on CD45RA- CD4+ T cell	36.8683	85	0.999999
ieu-b-85.vcf	ebi-a-GCST90001845	CD3 on CD45RA- CD4+ T cell	36.985	86	0.999999
ieu-b-85.vcf	ebi-a-GCST90001910	CD45 on B cell	34.486	87	1
ieu-b-85.vcf	ebi-a-GCST90001910	CD45 on B cell	37.0215	88	1
ieu-b-85.vcf	ebi-a-GCST90001830	BAFF-R on CD20- B cell	55.8005	93	0.99921
ieu-b-85.vcf	ebi-a-GCST90001830	BAFF-R on CD20- B cell	56.0459	94	0.999345
ieu-b-85.vcf	ebi-a-GCST90001774	CD24 on transitional B cell	38.3535	86	0.999998
ieu-b-85.vcf	ebi-a-GCST90001774	CD24 on transitional B cell	38.6078	87	0.999998
ieu-b-85.vcf	ebi-a-GCST90001452	CD11c+ CD62L- monocyte Absolute Count	38.2554	91	1
ieu-b-85.vcf	ebi-a-GCST90001452	CD11c+ CD62L- monocyte Absolute Count	38.9641	92	1
ieu-b-85.vcf	ebi-a-GCST90001410	IgD- CD38+ B cell %B cell	52.7455	87	0.998625
ieu-b-85.vcf	ebi-a-GCST90001410	IgD- CD38+ B cell %B cell	52.7471	88	0.998952
ieu-b-85.vcf	ebi-a-GCST90002111	HLA DR on CD33dim HLA DR+ CD11b-	21.8162	66	1
ieu-b-85.vcf	ebi-a-GCST90002111	HLA DR on CD33dim HLA DR+ CD11b-	22.3142	67	1
ieu-b-85.vcf	ebi-a-GCST90001416	IgD+ CD24- B cell Absolute Count	47.5544	86	0.999753
ieu-b-85.vcf	ebi-a-GCST90001416	IgD+ CD24- B cell Absolute Count	47.604	87	0.999816
ieu-b-85.vcf	ebi-a-GCST90001760	CD20 on unswitched memory B cell	45.802	91	0.99998
ieu-b-85.vcf	ebi-a-GCST90001760	CD20 on unswitched memory B cell	46.1191	92	0.999983
ieu-b-85.vcf	ebi-a-GCST90001810	CD38 on CD3- CD19-	20.6566	76	1
ieu-b-85.vcf	ebi-a-GCST90001810	CD38 on CD3- CD19-	20.8103	77	1
ieu-b-85.vcf	ebi-a-GCST90001499	Activated & resting CD4 regulatory T cell %CD4 regulatory T cell	53.1846	87	0.998399
ieu-b-85.vcf	ebi-a-GCST90001499	Activated & resting CD4 regulatory T cell %CD4 regulatory T cell	53.2024	88	0.998769
ieu-b-85.vcf	ebi-a-GCST90002034	CD39 on monocyte	41.9682	76	0.999472
ieu-b-85.vcf	ebi-a-GCST90002034	CD39 on monocyte	42.0339	77	0.999605
ieu-b-85.vcf	ebi-a-GCST90001820	IgD on IgD+ CD24+ B cell	39.2641	89	0.999999
ieu-b-85.vcf	ebi-a-GCST90001820	IgD on IgD+ CD24+ B cell	40.3295	90	0.999999
ieu-b-85.vcf	ebi-a-GCST90001441	IgD+ CD24- B cell %lymphocyte	50.8078	89	0.999622
ieu-b-85.vcf	ebi-a-GCST90001441	IgD+ CD24- B cell %lymphocyte	51.3814	90	0.999647
ieu-b-85.vcf	ebi-a-GCST90001808	CD27 on switched memory B cell	49.7302	91	0.99987
ieu-b-85.vcf	ebi-a-GCST90001808	CD27 on switched memory B cell	50.2906	92	0.999879
ieu-b-85.vcf	ebi-a-GCST90001951	CD33 on CD66b++ myeloid cell	13.6691	67	1
ieu-b-85.vcf	ebi-a-GCST90001951	CD33 on CD66b++ myeloid cell	13.7119	68	1
ieu-b-85.vcf	ebi-a-GCST90001654	CD28- CD4-CD8- T cell Absolute Count	42.6188	89	0.999992
ieu-b-85.vcf	ebi-a-GCST90001654	CD28- CD4-CD8- T cell Absolute Count	44.2359	90	0.999987
ieu-b-85.vcf	ebi-a-GCST90002082	SSC-A on CD8+ T cell	45.0092	99	0.999999
ieu-b-85.vcf	ebi-a-GCST90002082	SSC-A on CD8+ T cell	45.2799	100	1
ieu-b-85.vcf	ebi-a-GCST90001764	CD24 on CD24+ CD27+ B cell	6.83618	20	0.997189
ieu-b-85.vcf	ebi-a-GCST90001764	CD24 on CD24+ CD27+ B cell	6.83622	21	0.998442
ieu-b-85.vcf	ebi-a-GCST90002074	SSC-A on CD14+ monocyte	48.4862	86	0.999635
ieu-b-85.vcf	ebi-a-GCST90002074	SSC-A on CD14+ monocyte	48.4896	87	0.999731
ieu-b-85.vcf	ebi-a-GCST90001537	Central Memory CD4+ T cell Absolute Count	46.5647	93	0.999985
ieu-b-85.vcf	ebi-a-GCST90001537	Central Memory CD4+ T cell Absolute Count	47.6972	94	0.999982
ieu-b-85.vcf	ebi-a-GCST90001815	CD38 on IgD- CD38dim B cell	39.4893	90	0.999999
ieu-b-85.vcf	ebi-a-GCST90001815	CD38 on IgD- CD38dim B cell	39.6175	91	0.999999
ieu-b-85.vcf	ebi-a-GCST90001680	CD25++ CD8+ T cell %CD8+ T cell	43.4647	90	0.999992
ieu-b-85.vcf	ebi-a-GCST90001680	CD25++ CD8+ T cell %CD8+ T cell	43.9532	91	0.999992
ieu-b-85.vcf	ebi-a-GCST90001486	Activated CD4 regulatory T cell Absolute Count	43.1228	90	0.999993
ieu-b-85.vcf	ebi-a-GCST90001486	Activated CD4 regulatory T cell Absolute Count	43.6315	91	0.999994
ieu-b-85.vcf	ebi-a-GCST90001629	HLA DR+ CD8+ T cell %lymphocyte	55.4723	97	0.999777
ieu-b-85.vcf	ebi-a-GCST90001629	HLA DR+ CD8+ T cell %lymphocyte	56.5059	98	0.99975
ieu-b-85.vcf	ebi-a-GCST90002032	CD39 on CD39+ CD4+ T cell	33.986	86	1
ieu-b-85.vcf	ebi-a-GCST90002032	CD39 on CD39+ CD4+ T cell	34.0562	87	1
ieu-b-85.vcf	ebi-a-GCST90001786	CD25 on IgD- CD27- B cell	48.2662	90	0.999906
ieu-b-85.vcf	ebi-a-GCST90001786	CD25 on IgD- CD27- B cell	48.2911	91	0.999932
ieu-b-85.vcf	ebi-a-GCST90001493	Secreting CD4 regulatory T cell %CD4 regulatory T cell	51.7388	86	0.998734
ieu-b-85.vcf	ebi-a-GCST90001493	Secreting CD4 regulatory T cell %CD4 regulatory T cell	51.7949	87	0.99902
ieu-b-85.vcf	ebi-a-GCST90001790	CD25 on memory B cell	41.1444	89	0.999997
ieu-b-85.vcf	ebi-a-GCST90001790	CD25 on memory B cell	41.1851	90	0.999998
ieu-b-85.vcf	ebi-a-GCST90001838	CD3 on naive CD8+ T cell	36.7016	86	0.999999
ieu-b-85.vcf	ebi-a-GCST90001838	CD3 on naive CD8+ T cell	36.8454	87	1
ieu-b-85.vcf	ebi-a-GCST90002051	CD45 on basophil	21.1714	60	0.999999
ieu-b-85.vcf	ebi-a-GCST90002051	CD45 on basophil	21.4027	61	0.999999
ieu-b-85.vcf	ebi-a-GCST90001638	CD4-CD8- Natural Killer T %lymphocyte	42.79	90	0.999994
ieu-b-85.vcf	ebi-a-GCST90001638	CD4-CD8- Natural Killer T %lymphocyte	43.2112	91	0.999995
ieu-b-85.vcf	ebi-a-GCST90002014	CCR2 on CD62L+ myeloid Dendritic Cell	33.0844	88	1
ieu-b-85.vcf	ebi-a-GCST90002014	CCR2 on CD62L+ myeloid Dendritic Cell	33.6089	89	1
ieu-b-85.vcf	ebi-a-GCST90001575	Naive CD4+ T cell %T cell	39.8037	88	0.999998
ieu-b-85.vcf	ebi-a-GCST90001575	Naive CD4+ T cell %T cell	40.3438	89	0.999998
ieu-b-85.vcf	ebi-a-GCST90001948	CD33 on CD33dim HLA DR+ CD11b+	24.4369	68	1
ieu-b-85.vcf	ebi-a-GCST90001948	CD33 on CD33dim HLA DR+ CD11b+	26.3482	69	0.999999
ieu-b-85.vcf	ebi-a-GCST90001811	CD38 on IgD+ CD24- B cell	44.2629	82	0.999789
ieu-b-85.vcf	ebi-a-GCST90001811	CD38 on IgD+ CD24- B cell	44.4609	83	0.999834
ieu-b-85.vcf	ebi-a-GCST90001819	CD38 on transitional B cell	44.4585	91	0.99999
ieu-b-85.vcf	ebi-a-GCST90001819	CD38 on transitional B cell	45.5933	92	0.999987
ieu-b-85.vcf	ebi-a-GCST90001960	CD25 on CD4+ T cell	30.9529	86	1
ieu-b-85.vcf	ebi-a-GCST90001960	CD25 on CD4+ T cell	30.9529	87	1
ieu-b-85.vcf	ebi-a-GCST90001886	CD28 on CD39+ activated CD4 regulatory T cell	32.6369	87	1
ieu-b-85.vcf	ebi-a-GCST90001886	CD28 on CD39+ activated CD4 regulatory T cell	32.6665	88	1
ieu-b-85.vcf	ebi-a-GCST90001620	HLA DR+ T cell%lymphocyte	54.9688	98	0.999865
ieu-b-85.vcf	ebi-a-GCST90001620	HLA DR+ T cell%lymphocyte	54.984	99	0.9999
ieu-b-85.vcf	ebi-a-GCST90001502	Activated & secreting CD4 regulatory T cell %CD4 regulatory T cell	32.0055	86	1
ieu-b-85.vcf	ebi-a-GCST90001502	Activated & secreting CD4 regulatory T cell %CD4 regulatory T cell	32.0976	87	1
ieu-b-85.vcf	ebi-a-GCST90001435	Plasma Blast-Plasma Cell %lymphocyte	47.9734	87	0.999784
ieu-b-85.vcf	ebi-a-GCST90001435	Plasma Blast-Plasma Cell %lymphocyte	48.863	88	0.999769
ieu-b-85.vcf	ebi-a-GCST90001812	CD38 on IgD+ CD38+ B cell	37.0463	81	0.999993
ieu-b-85.vcf	ebi-a-GCST90001812	CD38 on IgD+ CD38+ B cell	37.0463	82	0.999995
ieu-b-85.vcf	ebi-a-GCST90001438	IgD- CD38dim B cell Absolute Count	48.7705	93	0.999956
ieu-b-85.vcf	ebi-a-GCST90001438	IgD- CD38dim B cell Absolute Count	50.2731	94	0.999937
ieu-b-85.vcf	ebi-a-GCST90002053	CD45 on CD33+ HLA DR+	27.9791	69	0.999997
ieu-b-85.vcf	ebi-a-GCST90002053	CD45 on CD33+ HLA DR+	28.0013	70	0.999998
ieu-b-85.vcf	ebi-a-GCST90002066	CD4 on activated CD4 regulatory T cell	35.109	91	1
ieu-b-85.vcf	ebi-a-GCST90002066	CD4 on activated CD4 regulatory T cell	35.5291	92	1
ieu-b-85.vcf	ebi-a-GCST90001413	IgD- CD24- B cell %B cell	56.6877	93	0.998923
ieu-b-85.vcf	ebi-a-GCST90001413	IgD- CD24- B cell %B cell	57.1598	94	0.999029
ieu-b-85.vcf	ebi-a-GCST90001509	CD25++ CD45RA+ CD4 not regulatory T cell %T cell	39.8665	89	0.999999
ieu-b-85.vcf	ebi-a-GCST90001509	CD25++ CD45RA+ CD4 not regulatory T cell %T cell	40.502	90	0.999999
ieu-b-85.vcf	ebi-a-GCST90001996	CX3CR1 on CD14+ CD16+ monocyte	42.5824	90	0.999995
ieu-b-85.vcf	ebi-a-GCST90001996	CX3CR1 on CD14+ CD16+ monocyte	42.5846	91	0.999997
ieu-b-85.vcf	ebi-a-GCST90001660	CD39+ CD4+ T cell Absolute Count	46.6419	92	0.999978
ieu-b-85.vcf	ebi-a-GCST90001660	CD39+ CD4+ T cell Absolute Count	46.7594	93	0.999984
ieu-b-85.vcf	ebi-a-GCST90001460	Plasmacytoid Dendritic Cell Absolute Count	45.0909	92	0.99999
ieu-b-85.vcf	ebi-a-GCST90001460	Plasmacytoid Dendritic Cell Absolute Count	45.4093	93	0.999992
ieu-b-85.vcf	ebi-a-GCST90001870	CD34 on Hematopoietic Stem Cell	22.2624	73	1
ieu-b-85.vcf	ebi-a-GCST90001870	CD34 on Hematopoietic Stem Cell	22.7627	74	1
ieu-b-85.vcf	ebi-a-GCST90001761	CD20 on switched memory B cell	38.4401	91	1
ieu-b-85.vcf	ebi-a-GCST90001761	CD20 on switched memory B cell	38.4579	92	1
ieu-b-85.vcf	ebi-a-GCST90001780	CD25 on IgD+ CD38- B cell	44.6508	88	0.999967
ieu-b-85.vcf	ebi-a-GCST90001780	CD25 on IgD+ CD38- B cell	45.2194	89	0.999969
ieu-b-85.vcf	ebi-a-GCST90001731	CD19 on IgD- CD24- B cell	48.607	89	0.999849
ieu-b-85.vcf	ebi-a-GCST90001731	CD19 on IgD- CD24- B cell	48.6891	90	0.999887
ieu-b-85.vcf	ebi-a-GCST90001494	Secreting CD4 regulatory T cell %CD4+ T cell	31.725	72	0.99999
ieu-b-85.vcf	ebi-a-GCST90001494	Secreting CD4 regulatory T cell %CD4+ T cell	34.1493	73	0.999971
ieu-b-85.vcf	ebi-a-GCST90002035	CD80 on myeloid Dendritic Cell	42.2065	89	0.999994
ieu-b-85.vcf	ebi-a-GCST90002035	CD80 on myeloid Dendritic Cell	42.2122	90	0.999996
ieu-b-85.vcf	ebi-a-GCST90001621	Natural Killer T Absolute Count	53.207	97	0.999912
ieu-b-85.vcf	ebi-a-GCST90001621	Natural Killer T Absolute Count	56.0525	98	0.999791
ieu-b-85.vcf	ebi-a-GCST90002095	CD11b on CD33dim HLA DR-	21.6936	71	1
ieu-b-85.vcf	ebi-a-GCST90002095	CD11b on CD33dim HLA DR-	23.5506	72	1
ieu-b-85.vcf	ebi-a-GCST90001782	CD25 on IgD+ CD38- unswitched memory B cell	20.6896	72	1
ieu-b-85.vcf	ebi-a-GCST90001782	CD25 on IgD+ CD38- unswitched memory B cell	20.7551	73	1
ieu-b-85.vcf	ebi-a-GCST90001425	IgD- CD38+ B cell %lymphocyte	46.8927	86	0.999814
ieu-b-85.vcf	ebi-a-GCST90001425	IgD- CD38+ B cell %lymphocyte	47.0982	87	0.999853
ieu-b-85.vcf	ebi-a-GCST90001715	BAFF-R on memory B cell	46.0056	90	0.999968
ieu-b-85.vcf	ebi-a-GCST90001715	BAFF-R on memory B cell	46.427	91	0.999972
ieu-b-85.vcf	ebi-a-GCST90002031	CD39 on CD39+ secreting CD4 regulatory T cell	29.4946	88	1
ieu-b-85.vcf	ebi-a-GCST90002031	CD39 on CD39+ secreting CD4 regulatory T cell	29.5059	89	1
ieu-b-85.vcf	ebi-a-GCST90001701	BAFF-R on CD20- CD38- B cell	45.5117	88	0.99995
ieu-b-85.vcf	ebi-a-GCST90001701	BAFF-R on CD20- CD38- B cell	45.5155	89	0.999964
ieu-b-85.vcf	ebi-a-GCST90001405	Plasma Blast-Plasma Cell Absolute Count	47.8805	81	0.998745
ieu-b-85.vcf	ebi-a-GCST90001405	Plasma Blast-Plasma Cell Absolute Count	48.094	82	0.998978
ieu-b-85.vcf	ebi-a-GCST90002105	HLA DR on plasmacytoid Dendritic Cell	24.1247	92	1
ieu-b-85.vcf	ebi-a-GCST90002105	HLA DR on plasmacytoid Dendritic Cell	24.3063	93	1
ieu-b-85.vcf	ebi-a-GCST90001800	CD27 on IgD+ CD24+ B cell	41.0482	91	0.999999
ieu-b-85.vcf	ebi-a-GCST90001800	CD27 on IgD+ CD24+ B cell	41.0512	92	0.999999
ieu-b-85.vcf	ebi-a-GCST90001725	CD19 on IgD+ CD24- B cell	33.8558	89	1
ieu-b-85.vcf	ebi-a-GCST90001725	CD19 on IgD+ CD24- B cell	34.4188	90	1
ieu-b-85.vcf	ebi-a-GCST90001703	BAFF-R on IgD+ CD24+ B cell	42.5867	88	0.999989
ieu-b-85.vcf	ebi-a-GCST90001703	BAFF-R on IgD+ CD24+ B cell	42.5919	89	0.999992
ieu-b-85.vcf	ebi-a-GCST90001459	Myeloid Dendritic Cell %Dendritic Cell	32.9374	87	1
ieu-b-85.vcf	ebi-a-GCST90001459	Myeloid Dendritic Cell %Dendritic Cell	32.9572	88	1
ieu-b-85.vcf	ebi-a-GCST90001742	CD19 on transitional B cell	44.4914	94	0.999997
ieu-b-85.vcf	ebi-a-GCST90001742	CD19 on transitional B cell	44.5578	95	0.999998
ieu-b-85.vcf	ebi-a-GCST90001645	Natural Killer Absolute Count	52.2188	94	0.999853
ieu-b-85.vcf	ebi-a-GCST90001645	Natural Killer Absolute Count	52.7165	95	0.999867
ieu-b-85.vcf	ebi-a-GCST90001409	Naive-mature B cell Absolute Count	42.1788	81	0.999888
ieu-b-85.vcf	ebi-a-GCST90001409	Naive-mature B cell Absolute Count	42.2733	82	0.999917
ieu-b-85.vcf	ebi-a-GCST90001949	CD33 on CD33dim HLA DR+ CD11b-	25.5733	70	1
ieu-b-85.vcf	ebi-a-GCST90001949	CD33 on CD33dim HLA DR+ CD11b-	26.8872	71	1
ieu-b-85.vcf	ebi-a-GCST90001607	CD8+ T cell %leukocyte	64.8911	99	0.996811
ieu-b-85.vcf	ebi-a-GCST90001607	CD8+ T cell %leukocyte	65.0107	100	0.997385
ieu-b-85.vcf	ebi-a-GCST90001429	IgD+ CD38+ B cell %lymphocyte	46.4024	91	0.999973
ieu-b-85.vcf	ebi-a-GCST90001429	IgD+ CD38+ B cell %lymphocyte	46.4513	92	0.99998
ieu-b-85.vcf	ebi-a-GCST90001565	Central Memory CD4-CD8- T cell %T cell	40.651	92	0.999999
ieu-b-85.vcf	ebi-a-GCST90001565	Central Memory CD4-CD8- T cell %T cell	40.6951	93	1
ieu-b-85.vcf	ebi-a-GCST90001993	PDL-1 on CD14+ CD16- monocyte	43.8978	92	0.999995
ieu-b-85.vcf	ebi-a-GCST90001993	PDL-1 on CD14+ CD16- monocyte	43.9036	93	0.999997
ieu-b-85.vcf	ebi-a-GCST90001697	CD45RA- CD28- CD8+ T cell %T cell	46.9407	87	0.999863
ieu-b-85.vcf	ebi-a-GCST90001697	CD45RA- CD28- CD8+ T cell %T cell	47.1834	88	0.999889
ieu-b-85.vcf	ebi-a-GCST90001805	CD27 on memory B cell	47.511	90	0.999934
ieu-b-85.vcf	ebi-a-GCST90001805	CD27 on memory B cell	47.6679	91	0.999949
ieu-b-85.vcf	ebi-a-GCST90001854	CD3 on CD39+ activated CD4 regulatory T cell	43.9199	88	0.999977
ieu-b-85.vcf	ebi-a-GCST90001854	CD3 on CD39+ activated CD4 regulatory T cell	44.9674	89	0.999973
ieu-b-85.vcf	ebi-a-GCST90001615	TCRgd T cell Absolute Count	44.0626	94	0.999997
ieu-b-85.vcf	ebi-a-GCST90001615	TCRgd T cell Absolute Count	44.2645	95	0.999998
ieu-b-85.vcf	ebi-a-GCST90001525	CD33dim HLA DR+ CD11b+ Absolute Count	19.9331	82	1
ieu-b-85.vcf	ebi-a-GCST90001525	CD33dim HLA DR+ CD11b+ Absolute Count	19.9387	83	1
ieu-b-85.vcf	ebi-a-GCST90002067	CD4 on CD39+ activated CD4 regulatory T cell	35.4599	92	1
ieu-b-85.vcf	ebi-a-GCST90002067	CD4 on CD39+ activated CD4 regulatory T cell	35.9875	93	1
ieu-b-85.vcf	ebi-a-GCST90001859	CD3 on CD8+ T cell	37.8639	89	1
ieu-b-85.vcf	ebi-a-GCST90001859	CD3 on CD8+ T cell	38.606	90	1
ieu-b-85.vcf	ebi-a-GCST90001625	HLA DR+ CD4+ T cell %T cell	38.3664	83	0.999993
ieu-b-85.vcf	ebi-a-GCST90001625	HLA DR+ CD4+ T cell %T cell	38.4761	84	0.999995
ieu-b-85.vcf	ebi-a-GCST90002040	CD80 on granulocyte	42.7521	85	0.999964
ieu-b-85.vcf	ebi-a-GCST90002040	CD80 on granulocyte	42.754	86	0.999975
ieu-b-85.vcf	ebi-a-GCST90001828	IgD on transitional B cell	52.762	93	0.99975
ieu-b-85.vcf	ebi-a-GCST90001828	IgD on transitional B cell	54.9727	94	0.999559
ieu-b-85.vcf	ebi-a-GCST90001988	HLA DR on CD14+ CD16- monocyte	41.6285	91	0.999998
ieu-b-85.vcf	ebi-a-GCST90001988	HLA DR on CD14+ CD16- monocyte	42.5962	92	0.999998
ieu-b-85.vcf	ebi-a-GCST90001558	Terminally Differentiated CD8+ T cell %CD8+ T cell	48.6789	92	0.999942
ieu-b-85.vcf	ebi-a-GCST90001558	Terminally Differentiated CD8+ T cell %CD8+ T cell	49.4134	93	0.999941
ieu-b-85.vcf	ebi-a-GCST90001913	CD45 on granulocyte	46.406	83	0.999612
ieu-b-85.vcf	ebi-a-GCST90001913	CD45 on granulocyte	46.8271	84	0.99966
ieu-b-85.vcf	ebi-a-GCST90001432	Unswitched memory B cell %lymphocyte	50.4363	92	0.999871
ieu-b-85.vcf	ebi-a-GCST90001432	Unswitched memory B cell %lymphocyte	50.6301	93	0.999898
ieu-b-85.vcf	ebi-a-GCST90002094	CD11b on Monocytic Myeloid-Derived Suppressor Cells	26.159	72	1
ieu-b-85.vcf	ebi-a-GCST90002094	CD11b on Monocytic Myeloid-Derived Suppressor Cells	26.2394	73	1
ieu-b-85.vcf	ebi-a-GCST90001550	Central Memory CD8+ T cell %T cell	47.9196	88	0.999846
ieu-b-85.vcf	ebi-a-GCST90001550	Central Memory CD8+ T cell %T cell	47.9836	89	0.999886
ieu-b-85.vcf	ebi-a-GCST90002099	CD4RA on Terminally Differentiated CD4+ T cell	37.4979	96	1
ieu-b-85.vcf	ebi-a-GCST90002099	CD4RA on Terminally Differentiated CD4+ T cell	38.2779	97	1
ieu-b-85.vcf	ebi-a-GCST90001407	Memory B cell Absolute Count	34.8117	92	1
ieu-b-85.vcf	ebi-a-GCST90001407	Memory B cell Absolute Count	34.9327	93	1
ieu-b-85.vcf	ebi-a-GCST90001454	CD62L- HLA DR++ monocyte Absolute Count	39.1024	81	0.999977
ieu-b-85.vcf	ebi-a-GCST90001454	CD62L- HLA DR++ monocyte Absolute Count	39.7772	82	0.999978
ieu-b-85.vcf	ebi-a-GCST90001825	IgD on IgD+ CD38dim B cell	53.5237	87	0.998204
ieu-b-85.vcf	ebi-a-GCST90001825	IgD on IgD+ CD38dim B cell	58.4182	88	0.993654
ieu-b-85.vcf	ebi-a-GCST90001920	CD45 on HLA DR+ CD4+ T cell	39.7674	86	0.999995
ieu-b-85.vcf	ebi-a-GCST90001920	CD45 on HLA DR+ CD4+ T cell	39.7783	87	0.999997
ieu-b-85.vcf	ebi-a-GCST90002091	CD11b on CD14+ monocyte	26.1239	75	1
ieu-b-85.vcf	ebi-a-GCST90002091	CD11b on CD14+ monocyte	26.503	76	1
ieu-b-85.vcf	ebi-a-GCST90001781	CD25 on IgD+ CD38- naive B cell	21.5887	71	1
ieu-b-85.vcf	ebi-a-GCST90001781	CD25 on IgD+ CD38- naive B cell	21.5887	72	1
ieu-b-85.vcf	ebi-a-GCST90001588	T/B cell	44.5552	95	0.999998
ieu-b-85.vcf	ebi-a-GCST90001588	T/B cell	44.9687	96	0.999998
ieu-b-85.vcf	ebi-a-GCST90001688	CD28+ CD45RA+ CD8+ T cell %T cell	56.6867	92	0.998598
ieu-b-85.vcf	ebi-a-GCST90001688	CD28+ CD45RA+ CD8+ T cell %T cell	59.1754	93	0.997572
ieu-b-85.vcf	ebi-a-GCST90001979	CD16 on CD14- CD16+ monocyte	45.0082	92	0.999991
ieu-b-85.vcf	ebi-a-GCST90001979	CD16 on CD14- CD16+ monocyte	45.0083	93	0.999994
ieu-b-85.vcf	ebi-a-GCST90002108	HLA DR on CD33+ HLA DR+ CD14-	18.3322	70	1
ieu-b-85.vcf	ebi-a-GCST90002108	HLA DR on CD33+ HLA DR+ CD14-	18.3485	71	1
ieu-b-85.vcf	ebi-a-GCST90001518	CD33+ HLA DR+ CD14- Absolute Count	35.9703	76	0.999974
ieu-b-85.vcf	ebi-a-GCST90001518	CD33+ HLA DR+ CD14- Absolute Count	36.1793	77	0.99998
ieu-b-85.vcf	ebi-a-GCST90002092	CD11b on Granulocytic Myeloid-Derived Suppressor Cells	3.38233	11	0.984648
ieu-b-85.vcf	ebi-a-GCST90002092	CD11b on Granulocytic Myeloid-Derived Suppressor Cells	3.40569	12	0.991939
ieu-b-85.vcf	ebi-a-GCST90002098	CD45RA on naive CD4+ T cell	30.5549	94	1
ieu-b-85.vcf	ebi-a-GCST90002098	CD45RA on naive CD4+ T cell	30.5761	95	1
ieu-b-85.vcf	ebi-a-GCST90001408	Naive-mature B cell %B cell	39.0242	83	0.99999
ieu-b-85.vcf	ebi-a-GCST90001408	Naive-mature B cell %B cell	39.3518	84	0.999992
ieu-b-85.vcf	ebi-a-GCST90001648	HLA DR+ Natural Killer Absolute Count	30.9586	87	1
ieu-b-85.vcf	ebi-a-GCST90001648	HLA DR+ Natural Killer Absolute Count	33.6536	88	1
ieu-b-85.vcf	ebi-a-GCST90001925	CD127 on CD28+ CD4-CD8- T cell	41.0452	81	0.999936
ieu-b-85.vcf	ebi-a-GCST90001925	CD127 on CD28+ CD4-CD8- T cell	41.0895	82	0.999955
ieu-b-85.vcf	ebi-a-GCST90001798	CD27 on CD24+ CD27+ B cell	44.3653	91	0.999991
ieu-b-85.vcf	ebi-a-GCST90001798	CD27 on CD24+ CD27+ B cell	44.6698	92	0.999992
ieu-b-85.vcf	ebi-a-GCST90001673	CD28- CD127- CD25++ CD8+ T cell %T cell	42.3795	90	0.999995
ieu-b-85.vcf	ebi-a-GCST90001673	CD28- CD127- CD25++ CD8+ T cell %T cell	42.4512	91	0.999997
ieu-b-85.vcf	ebi-a-GCST90001984	HLA DR on CD14- CD16+ monocyte	46.8554	92	0.999976
ieu-b-85.vcf	ebi-a-GCST90001984	HLA DR on CD14- CD16+ monocyte	46.8674	93	0.999983
ieu-b-85.vcf	ebi-a-GCST90001751	CD20 on IgD+ CD38+ B cell	37.498	82	0.999994
ieu-b-85.vcf	ebi-a-GCST90001751	CD20 on IgD+ CD38+ B cell	37.8895	83	0.999995
ieu-b-85.vcf	ebi-a-GCST90001508	CD25++ CD45RA+ CD4 not regulatory T cell %CD4+ T cell	38.5257	83	0.999993
ieu-b-85.vcf	ebi-a-GCST90001508	CD25++ CD45RA+ CD4 not regulatory T cell %CD4+ T cell	38.562	84	0.999995
ieu-b-85.vcf	ebi-a-GCST90001933	CD25 on CD45RA- CD4 not regulatory T cell	29.9272	84	1
ieu-b-85.vcf	ebi-a-GCST90001933	CD25 on CD45RA- CD4 not regulatory T cell	30.0171	85	1
ieu-b-85.vcf	ebi-a-GCST90001520	CD33+ HLA DR+ CD14dim Absolute Count	32.9533	73	0.999986
ieu-b-85.vcf	ebi-a-GCST90001520	CD33+ HLA DR+ CD14dim Absolute Count	32.9838	74	0.99999
ieu-b-85.vcf	ebi-a-GCST90001918	CD45 on HLA DR+ T cell	41.6325	90	0.999997
ieu-b-85.vcf	ebi-a-GCST90001918	CD45 on HLA DR+ T cell	42.6071	91	0.999996
ieu-b-85.vcf	ebi-a-GCST90001863	CD3 on CD28+ CD45RA- CD8+ T cell	36.7781	80	0.999991
ieu-b-85.vcf	ebi-a-GCST90001863	CD3 on CD28+ CD45RA- CD8+ T cell	37.2394	81	0.999992
ieu-b-85.vcf	ebi-a-GCST90001670	CD39+ CD8+ T cell %T cell	44.6103	86	0.999935
ieu-b-85.vcf	ebi-a-GCST90001670	CD39+ CD8+ T cell %T cell	44.9197	87	0.999947
ieu-b-85.vcf	ebi-a-GCST90001501	Activated & secreting CD4 regulatory T cell Absolute Count	42.092	94	0.999999
ieu-b-85.vcf	ebi-a-GCST90001501	Activated & secreting CD4 regulatory T cell Absolute Count	42.1859	95	0.999999
ieu-b-85.vcf	ebi-a-GCST90001804	CD27 on IgD- CD38dim B cell	47.5936	90	0.999931
ieu-b-85.vcf	ebi-a-GCST90001804	CD27 on IgD- CD38dim B cell	47.814	91	0.999945
ieu-b-85.vcf	ebi-a-GCST90001772	CD24 on unswitched memory B cell	45.6097	88	0.999947
ieu-b-85.vcf	ebi-a-GCST90001772	CD24 on unswitched memory B cell	45.6152	89	0.999963
ieu-b-85.vcf	ebi-a-GCST90002119	CD8 on CD28+ CD45RA+ CD8+ T cell	32.9111	76	0.999996
ieu-b-85.vcf	ebi-a-GCST90002119	CD8 on CD28+ CD45RA+ CD8+ T cell	32.9324	77	0.999997
ieu-b-85.vcf	ebi-a-GCST90001883	CD16-CD56 on Natural Killer T	34.8639	85	1
ieu-b-85.vcf	ebi-a-GCST90001883	CD16-CD56 on Natural Killer T	35.0811	86	1
ieu-b-85.vcf	ebi-a-GCST90001849	CD3 on HLA DR+ CD4+ T cell	40.4681	96	1
ieu-b-85.vcf	ebi-a-GCST90001849	CD3 on HLA DR+ CD4+ T cell	40.4683	97	1
ieu-b-85.vcf	ebi-a-GCST90001630	CD8+ Natural Killer T Absolute Count	42.3404	92	0.999998
ieu-b-85.vcf	ebi-a-GCST90001630	CD8+ Natural Killer T Absolute Count	46.2046	93	0.999988
ieu-b-85.vcf	ebi-a-GCST90001899	CD28 on CD4 regulatory T cell	46.7679	98	0.999997
ieu-b-85.vcf	ebi-a-GCST90001899	CD28 on CD4 regulatory T cell	46.7801	99	0.999998
ieu-b-85.vcf	ebi-a-GCST90002073	SSC-A on monocyte	26.9915	75	1
ieu-b-85.vcf	ebi-a-GCST90002073	SSC-A on monocyte	27.1862	76	1
ieu-b-85.vcf	ebi-a-GCST90001733	CD19 on IgD- CD38- B cell	47.2449	89	0.999918
ieu-b-85.vcf	ebi-a-GCST90001733	CD19 on IgD- CD38- B cell	47.2941	90	0.99994
ieu-b-85.vcf	ebi-a-GCST90001526	CD33dim HLA DR+ CD11b+ %CD33dim HLA DR+	24.8109	82	1
ieu-b-85.vcf	ebi-a-GCST90001526	CD33dim HLA DR+ CD11b+ %CD33dim HLA DR+	25.1575	83	1
ieu-b-85.vcf	ebi-a-GCST90001710	BAFF-R on IgD- CD24- B cell	51.7281	94	0.999881
ieu-b-85.vcf	ebi-a-GCST90001710	BAFF-R on IgD- CD24- B cell	51.7443	95	0.999912
ieu-b-85.vcf	ebi-a-GCST90001757	CD20 on IgD- CD38dim B cell	46.7823	94	0.999989
ieu-b-85.vcf	ebi-a-GCST90001757	CD20 on IgD- CD38dim B cell	46.7929	95	0.999992
ieu-b-85.vcf	ebi-a-GCST90001714	BAFF-R on IgD- CD38dim B cell	13.8072	19	0.79481
ieu-b-85.vcf	ebi-a-GCST90001714	BAFF-R on IgD- CD38dim B cell	14.3023	20	0.814845
ieu-b-85.vcf	ebi-a-GCST90001773	CD24 on switched memory B cell	32.9112	89	1
ieu-b-85.vcf	ebi-a-GCST90001773	CD24 on switched memory B cell	33.2517	90	1
ieu-b-85.vcf	ebi-a-GCST90001540	Naive CD4+ T cell Absolute Count	40.4037	90	0.999999
ieu-b-85.vcf	ebi-a-GCST90001540	Naive CD4+ T cell Absolute Count	40.6686	91	0.999999
ieu-b-85.vcf	ebi-a-GCST90002084	SSC-A on Natural Killer T	26.4812	85	1
ieu-b-85.vcf	ebi-a-GCST90002084	SSC-A on Natural Killer T	26.4855	86	1
ieu-b-85.vcf	ebi-a-GCST90001754	CD20 on IgD- CD27- B cell	38.7136	77	0.999919
ieu-b-85.vcf	ebi-a-GCST90001754	CD20 on IgD- CD27- B cell	38.9038	78	0.999938
ieu-b-85.vcf	ebi-a-GCST90001956	CD33 on CD33+ HLA DR+	20.3806	73	1
ieu-b-85.vcf	ebi-a-GCST90001956	CD33 on CD33+ HLA DR+	22.7969	74	1
ieu-b-85.vcf	ebi-a-GCST90001420	IgD- CD38+ B cell Absolute Count	43.6609	82	0.99984
ieu-b-85.vcf	ebi-a-GCST90001420	IgD- CD38+ B cell Absolute Count	43.6709	83	0.999885
ieu-b-85.vcf	ebi-a-GCST90001536	CD45RA- CD4+ T cell %T cell	34.9873	90	1
ieu-b-85.vcf	ebi-a-GCST90001536	CD45RA- CD4+ T cell %T cell	35.1519	91	1
ieu-b-85.vcf	ebi-a-GCST90001472	CD62L- CD86+ myeloid Dendritic Cell Absolute Count	43.568	95	0.999999
ieu-b-85.vcf	ebi-a-GCST90001472	CD62L- CD86+ myeloid Dendritic Cell Absolute Count	45.037	96	0.999998
ieu-b-85.vcf	ebi-a-GCST90001720	BAFF-R on transitional B cell	41.9842	88	0.999992
ieu-b-85.vcf	ebi-a-GCST90001720	BAFF-R on transitional B cell	43.1883	89	0.999989
ieu-b-85.vcf	ebi-a-GCST90001475	HLA DR++ monocyte %monocyte	41.1375	88	0.999995
ieu-b-85.vcf	ebi-a-GCST90001475	HLA DR++ monocyte %monocyte	41.3893	89	0.999996
ieu-b-85.vcf	ebi-a-GCST90001907	CCR7 on naive CD4+ T cell	35.8504	87	1
ieu-b-85.vcf	ebi-a-GCST90001907	CCR7 on naive CD4+ T cell	36.7501	88	1
ieu-b-85.vcf	ebi-a-GCST90002096	CD11b on basophil	21.905	70	1
ieu-b-85.vcf	ebi-a-GCST90002096	CD11b on basophil	25.016	71	1
ieu-b-85.vcf	ebi-a-GCST90001741	CD19 on IgD+ B cell	36.5736	90	1
ieu-b-85.vcf	ebi-a-GCST90001741	CD19 on IgD+ B cell	36.6264	91	1
ieu-b-85.vcf	ebi-a-GCST90002013	CCR2 on myeloid Dendritic Cell	31.3247	85	1
ieu-b-85.vcf	ebi-a-GCST90002013	CCR2 on myeloid Dendritic Cell	33.3225	86	1
ieu-b-85.vcf	ebi-a-GCST90001679	CD25++ CD8+ T cell %T cell	42.1348	88	0.999991
ieu-b-85.vcf	ebi-a-GCST90001679	CD25++ CD8+ T cell %T cell	42.3156	89	0.999994
ieu-b-85.vcf	ebi-a-GCST90001656	CD28+ CD4-CD8- T cell %CD4-CD8- T cell	37.0178	87	0.999999
ieu-b-85.vcf	ebi-a-GCST90001656	CD28+ CD4-CD8- T cell %CD4-CD8- T cell	41.2619	88	0.999995
ieu-b-85.vcf	ebi-a-GCST90001417	CD24+ CD27+ B cell %B cell	44.4672	90	0.999986
ieu-b-85.vcf	ebi-a-GCST90001417	CD24+ CD27+ B cell %B cell	44.4734	91	0.99999
ieu-b-85.vcf	ebi-a-GCST90001544	Effector Memory CD4+ T cell %T cell	40.7958	92	0.999999
ieu-b-85.vcf	ebi-a-GCST90001544	Effector Memory CD4+ T cell %T cell	40.8356	93	0.999999
ieu-b-85.vcf	ebi-a-GCST90001694	CD28- CD4-CD8- T cell %T cell	37.9442	86	0.999998
ieu-b-85.vcf	ebi-a-GCST90001694	CD28- CD4-CD8- T cell %T cell	39.6956	87	0.999997
ieu-b-85.vcf	ebi-a-GCST90001515	Immature Myeloid-Derived Suppressor Cells Absolute Count	27.3907	78	1
ieu-b-85.vcf	ebi-a-GCST90001515	Immature Myeloid-Derived Suppressor Cells Absolute Count	27.6056	79	1
ieu-b-85.vcf	ebi-a-GCST90001506	CD25++ CD4+ T cell %T cell	34.4509	93	1
ieu-b-85.vcf	ebi-a-GCST90001506	CD25++ CD4+ T cell %T cell	34.4606	94	1
ieu-b-85.vcf	ebi-a-GCST90001570	Effector Memory CD4-CD8- T cell %CD4-CD8- T cell	33.5235	84	1
ieu-b-85.vcf	ebi-a-GCST90001570	Effector Memory CD4-CD8- T cell %CD4-CD8- T cell	34.6179	85	1
ieu-b-85.vcf	ebi-a-GCST90001626	HLA DR+ CD4+ T cell %lymphocyte	45.8749	86	0.999882
ieu-b-85.vcf	ebi-a-GCST90001626	HLA DR+ CD4+ T cell %lymphocyte	45.875	87	0.999916
ieu-b-85.vcf	ebi-a-GCST90001567	Naive CD4-CD8- T cell %CD4-CD8- T cell	48.5951	99	0.999995
ieu-b-85.vcf	ebi-a-GCST90001567	Naive CD4-CD8- T cell %CD4-CD8- T cell	48.8758	100	0.999996
ieu-b-85.vcf	ebi-a-GCST90001478	CD4 regulatory T cell %CD4+ T cell	56.2366	93	0.999079
ieu-b-85.vcf	ebi-a-GCST90001478	CD4 regulatory T cell %CD4+ T cell	56.3134	94	0.999279
ieu-b-85.vcf	ebi-a-GCST90001813	CD38 on IgD+ CD38dim B cell	36.8612	74	0.999908
ieu-b-85.vcf	ebi-a-GCST90001813	CD38 on IgD+ CD38dim B cell	37.4626	75	0.999913
ieu-b-85.vcf	ebi-a-GCST90001465	CD86+ myeloid Dendritic Cell %Dendritic Cell	37.3025	96	1
ieu-b-85.vcf	ebi-a-GCST90001465	CD86+ myeloid Dendritic Cell %Dendritic Cell	37.4158	97	1
ieu-b-85.vcf	ebi-a-GCST90001504	CD25++ CD4+ T cell Absolute Count	41.0169	96	1
ieu-b-85.vcf	ebi-a-GCST90001504	CD25++ CD4+ T cell Absolute Count	41.04	97	1
ieu-b-85.vcf	ebi-a-GCST90001944	CD123 on plasmacytoid Dendritic Cell	28.742	81	1
ieu-b-85.vcf	ebi-a-GCST90001944	CD123 on plasmacytoid Dendritic Cell	28.8734	82	1
ieu-b-85.vcf	ebi-a-GCST90002110	HLA DR on CD33dim HLA DR+ CD11b+	22.9578	69	1
ieu-b-85.vcf	ebi-a-GCST90002110	HLA DR on CD33dim HLA DR+ CD11b+	23.4129	70	1
ieu-b-85.vcf	ebi-a-GCST90001566	Naive CD4-CD8- T cell Absolute Count	50.5641	97	0.999974
ieu-b-85.vcf	ebi-a-GCST90001566	Naive CD4-CD8- T cell Absolute Count	50.5653	98	0.999981
ieu-b-85.vcf	ebi-a-GCST90001841	CD3 on Central Memory CD4+ T cell	32.0507	76	0.999998
ieu-b-85.vcf	ebi-a-GCST90001841	CD3 on Central Memory CD4+ T cell	33.0867	77	0.999997
ieu-b-85.vcf	ebi-a-GCST90001614	CD8+ and CD8dim T cell %leukocyte	57.5839	100	0.999789
ieu-b-85.vcf	ebi-a-GCST90001614	CD8+ and CD8dim T cell %leukocyte	57.6568	101	0.999838
ieu-b-85.vcf	ebi-a-GCST90001727	CD19 on IgD+ CD38- naive B cell	22.2425	68	1
ieu-b-85.vcf	ebi-a-GCST90001727	CD19 on IgD+ CD38- naive B cell	22.4493	69	1
ieu-b-85.vcf	ebi-a-GCST90001470	CD62L- plasmacytoid Dendritic Cell Absolute Count	44.1465	87	0.999964
ieu-b-85.vcf	ebi-a-GCST90001470	CD62L- plasmacytoid Dendritic Cell Absolute Count	45.2571	88	0.999956
ieu-b-85.vcf	ebi-a-GCST90001505	CD25++ CD4+ T cell %CD4+ T cell	39.2677	94	1
ieu-b-85.vcf	ebi-a-GCST90001505	CD25++ CD4+ T cell %CD4+ T cell	39.3332	95	1
ieu-b-85.vcf	ebi-a-GCST90001397	Unswitched memory B cell %B cell	45.4478	85	0.999865
ieu-b-85.vcf	ebi-a-GCST90001397	Unswitched memory B cell %B cell	45.4553	86	0.999903
ieu-b-85.vcf	ebi-a-GCST90002030	CD39 on CD39+ activated CD4 regulatory T cell	33.052	87	1
ieu-b-85.vcf	ebi-a-GCST90002030	CD39 on CD39+ activated CD4 regulatory T cell	33.0806	88	1
ieu-b-85.vcf	ebi-a-GCST90002047	CD45 on Granulocytic Myeloid-Derived Suppressor Cells	16.2167	64	1
ieu-b-85.vcf	ebi-a-GCST90002047	CD45 on Granulocytic Myeloid-Derived Suppressor Cells	16.3256	65	1
ieu-b-85.vcf	ebi-a-GCST90001835	CD62L on granulocyte	32.47	80	1
ieu-b-85.vcf	ebi-a-GCST90001835	CD62L on granulocyte	32.9627	81	1
ieu-b-85.vcf	ebi-a-GCST90001428	IgD- CD38dim B cell %B cell	51.9893	88	0.999205
ieu-b-85.vcf	ebi-a-GCST90001428	IgD- CD38dim B cell %B cell	51.9897	89	0.999402
ieu-b-85.vcf	ebi-a-GCST90001580	CD14+ CD16+ monocyte Absolute Count	39.8818	93	1
ieu-b-85.vcf	ebi-a-GCST90001580	CD14+ CD16+ monocyte Absolute Count	39.9814	94	1
ieu-b-85.vcf	ebi-a-GCST90001704	BAFF-R on IgD+ CD24- B cell	47.2991	89	0.999916
ieu-b-85.vcf	ebi-a-GCST90001704	BAFF-R on IgD+ CD24- B cell	47.3556	90	0.999938
ieu-b-85.vcf	ebi-a-GCST90001601	Lymphocyte Absolute Count	36.9873	93	1
ieu-b-85.vcf	ebi-a-GCST90001601	Lymphocyte Absolute Count	37.6227	94	1
ieu-b-85.vcf	ebi-a-GCST90001791	CD25 on naive-mature B cell	33.9221	88	1
ieu-b-85.vcf	ebi-a-GCST90001791	CD25 on naive-mature B cell	34.0742	89	1
ieu-b-85.vcf	ebi-a-GCST90001469	CD62L- myeloid Dendritic Cell %Dendritic Cell	46.9379	93	0.999982
ieu-b-85.vcf	ebi-a-GCST90001469	CD62L- myeloid Dendritic Cell %Dendritic Cell	47.1254	94	0.999986
ieu-b-85.vcf	ebi-a-GCST90001869	CD3 on resting CD4 regulatory T cell	35.4348	85	1
ieu-b-85.vcf	ebi-a-GCST90001869	CD3 on resting CD4 regulatory T cell	35.516	86	1
ieu-b-85.vcf	ebi-a-GCST90001982	CCR2 on CD14- CD16+ monocyte	39.1506	92	1
ieu-b-85.vcf	ebi-a-GCST90001982	CCR2 on CD14- CD16+ monocyte	39.2859	93	1
ieu-b-85.vcf	ebi-a-GCST90001674	CD28- CD127- CD25++ CD8+ T cell %CD8+ T cell	38.1388	87	0.999999
ieu-b-85.vcf	ebi-a-GCST90001674	CD28- CD127- CD25++ CD8+ T cell %CD8+ T cell	38.3114	88	0.999999
ieu-b-85.vcf	ebi-a-GCST90001973	FSC-A on CD4+ T cell	30.8294	92	1
ieu-b-85.vcf	ebi-a-GCST90001973	FSC-A on CD4+ T cell	31.297	93	1
ieu-b-85.vcf	ebi-a-GCST90001878	HVEM on Effector Memory CD4+ T cell	13.8179	63	1
ieu-b-85.vcf	ebi-a-GCST90001878	HVEM on Effector Memory CD4+ T cell	13.9463	64	1
ieu-b-85.vcf	ebi-a-GCST90001678	CD28- CD25++ CD8+ T cell Absolute Count	36.3382	86	0.999999
ieu-b-85.vcf	ebi-a-GCST90001678	CD28- CD25++ CD8+ T cell Absolute Count	36.4367	87	1
ieu-b-85.vcf	ebi-a-GCST90002086	SSC-A on HLA DR+ CD8+ T cell	39.5129	88	0.999998
ieu-b-85.vcf	ebi-a-GCST90002086	SSC-A on HLA DR+ CD8+ T cell	40.0151	89	0.999998
ieu-b-85.vcf	ebi-a-GCST90001391	IgD+ B cell %B cell	48.1575	89	0.999876
ieu-b-85.vcf	ebi-a-GCST90001391	IgD+ B cell %B cell	48.5885	90	0.999892
ieu-b-85.vcf	ebi-a-GCST90001500	Activated & resting CD4 regulatory T cell %CD4+ T cell	40.2075	86	0.999994
ieu-b-85.vcf	ebi-a-GCST90001500	Activated & resting CD4 regulatory T cell %CD4+ T cell	40.2478	87	0.999996
ieu-b-85.vcf	ebi-a-GCST90001943	CD25 on activated & secreting CD4 regulatory T cell	45.2859	87	0.999936
ieu-b-85.vcf	ebi-a-GCST90001943	CD25 on activated & secreting CD4 regulatory T cell	46.8301	88	0.999906
ieu-b-85.vcf	ebi-a-GCST90001877	HVEM on naive CD4+ T cell	21.5625	64	1
ieu-b-85.vcf	ebi-a-GCST90001877	HVEM on naive CD4+ T cell	21.75	65	1
ieu-b-85.vcf	ebi-a-GCST90001594	CD4+CD8+ T cell Absolute Count	38.0181	90	1
ieu-b-85.vcf	ebi-a-GCST90001594	CD4+CD8+ T cell Absolute Count	38.8387	91	1
ieu-b-85.vcf	ebi-a-GCST90001442	CD24+ CD27+ B cell %lymphocyte	47.1132	91	0.999961
ieu-b-85.vcf	ebi-a-GCST90001442	CD24+ CD27+ B cell %lymphocyte	47.6844	92	0.999964
ieu-b-85.vcf	ebi-a-GCST90001639	CD3- lymphocyte Absolute Count	43.8726	87	0.999968
ieu-b-85.vcf	ebi-a-GCST90001639	CD3- lymphocyte Absolute Count	45.7241	88	0.999944
ieu-b-85.vcf	ebi-a-GCST90001395	IgD+ CD38- B cell %B cell	49.7529	89	0.999754
ieu-b-85.vcf	ebi-a-GCST90001395	IgD+ CD38- B cell %B cell	49.7604	90	0.999819
ieu-b-85.vcf	ebi-a-GCST90001468	CD62L- myeloid Dendritic Cell Absolute Count	44.6215	94	0.999997
ieu-b-85.vcf	ebi-a-GCST90001468	CD62L- myeloid Dendritic Cell Absolute Count	45.4857	95	0.999996
ieu-b-85.vcf	ebi-a-GCST90001604	T cell %lymphocyte	43.7693	90	0.99999
ieu-b-85.vcf	ebi-a-GCST90001604	T cell %lymphocyte	43.884	91	0.999993
ieu-b-85.vcf	ebi-a-GCST90001557	Terminally Differentiated CD8+ T cell Absolute Count	48.019	93	0.99997
ieu-b-85.vcf	ebi-a-GCST90001557	Terminally Differentiated CD8+ T cell Absolute Count	48.5339	94	0.999972
ieu-b-85.vcf	ebi-a-GCST90001616	TCRgd T cell %T cell	48.8502	92	0.999937
ieu-b-85.vcf	ebi-a-GCST90001616	TCRgd T cell %T cell	48.9712	93	0.999952
ieu-b-85.vcf	ebi-a-GCST90001609	CD4+ CD8dim T cell Absolute Count	42.8558	98	1
ieu-b-85.vcf	ebi-a-GCST90001609	CD4+ CD8dim T cell Absolute Count	42.8908	99	1
ieu-b-85.vcf	ebi-a-GCST90001848	CD3 on Natural Killer T	45.3067	94	0.999995
ieu-b-85.vcf	ebi-a-GCST90001848	CD3 on Natural Killer T	45.3077	95	0.999996
ieu-b-85.vcf	ebi-a-GCST90001583	Monocyte Absolute Count	39.6119	93	1
ieu-b-85.vcf	ebi-a-GCST90001583	Monocyte Absolute Count	39.6824	94	1
ieu-b-85.vcf	ebi-a-GCST90001586	CD14+ CD16- monocyte %monocyte	40.3291	95	1
ieu-b-85.vcf	ebi-a-GCST90001586	CD14+ CD16- monocyte %monocyte	40.3672	96	1
ieu-b-85.vcf	ebi-a-GCST90001846	CD3 on Central Memory CD8+ T cell	28.6799	78	1
ieu-b-85.vcf	ebi-a-GCST90001846	CD3 on Central Memory CD8+ T cell	31.1677	79	1
ieu-b-85.vcf	ebi-a-GCST90002044	CD45 on CD33dim HLA DR+ CD11b-	22.4298	76	1
ieu-b-85.vcf	ebi-a-GCST90002044	CD45 on CD33dim HLA DR+ CD11b-	22.7294	77	1
ieu-b-85.vcf	ebi-a-GCST90001985	CD40 on monocytes	49.8895	89	0.99974
ieu-b-85.vcf	ebi-a-GCST90001985	CD40 on monocytes	49.9737	90	0.999802
ieu-b-85.vcf	ebi-a-GCST90002007	HLA DR on CD14+ CD16+ monocyte	45.5465	88	0.999949
ieu-b-85.vcf	ebi-a-GCST90002007	HLA DR on CD14+ CD16+ monocyte	45.706	89	0.999961
ieu-b-85.vcf	ebi-a-GCST90001829	BAFF-R on B cell	43.5127	87	0.999974
ieu-b-85.vcf	ebi-a-GCST90001829	BAFF-R on B cell	43.5127	88	0.999982
ieu-b-85.vcf	ebi-a-GCST90001582	CD14+ CD16- monocyte Absolute Count	37.097	92	1
ieu-b-85.vcf	ebi-a-GCST90001582	CD14+ CD16- monocyte Absolute Count	37.1554	93	1
ieu-b-85.vcf	ebi-a-GCST90001548	Central Memory CD8+ T cell Absolute Count	48.0581	89	0.999882
ieu-b-85.vcf	ebi-a-GCST90001548	Central Memory CD8+ T cell Absolute Count	48.0807	90	0.999914
ieu-b-85.vcf	ebi-a-GCST90001436	Memory B cell %lymphocyte	46.0104	88	0.999936
ieu-b-85.vcf	ebi-a-GCST90001436	Memory B cell %lymphocyte	46.0176	89	0.999954
ieu-b-85.vcf	ebi-a-GCST90001403	Switched memory B cell Absolute Count	44.8437	94	0.999996
ieu-b-85.vcf	ebi-a-GCST90001403	Switched memory B cell Absolute Count	45.2665	95	0.999997
ieu-b-85.vcf	ebi-a-GCST90001836	CD66b on CD66b++ myeloid cell	17.5904	68	1
ieu-b-85.vcf	ebi-a-GCST90001836	CD66b on CD66b++ myeloid cell	17.9241	69	1
ieu-b-85.vcf	ebi-a-GCST90001691	CD28+ CD45RA- CD8+ T cell %T cell	56.4176	96	0.999571
ieu-b-85.vcf	ebi-a-GCST90001691	CD28+ CD45RA- CD8+ T cell %T cell	59.824	97	0.998914
ieu-b-85.vcf	ebi-a-GCST90001545	Terminally Differentiated CD4+ T cell Absolute Count	38.5487	84	0.999995
ieu-b-85.vcf	ebi-a-GCST90001545	Terminally Differentiated CD4+ T cell Absolute Count	40.3868	85	0.99999
ieu-b-85.vcf	ebi-a-GCST90001705	BAFF-R on IgD+ CD38- B cell	56.1011	95	0.999494
ieu-b-85.vcf	ebi-a-GCST90001705	BAFF-R on IgD+ CD38- B cell	56.1897	96	0.999606
ieu-b-85.vcf	ebi-a-GCST90001433	IgD- CD27- B cell %lymphocyte	51.6338	98	0.999969
ieu-b-85.vcf	ebi-a-GCST90001433	IgD- CD27- B cell %lymphocyte	53.4868	99	0.999948
ieu-b-85.vcf	ebi-a-GCST90001902	CD28 on activated CD4 regulatory T cell	33.0877	93	1
ieu-b-85.vcf	ebi-a-GCST90001902	CD28 on activated CD4 regulatory T cell	33.1448	94	1
ieu-b-85.vcf	ebi-a-GCST90001972	FSC-A on T cell	36.1957	90	1
ieu-b-85.vcf	ebi-a-GCST90001972	FSC-A on T cell	36.4004	91	1
ieu-b-85.vcf	ebi-a-GCST90001924	CD127 on CD28+ CD4+ T cell	40.2352	90	0.999999
ieu-b-85.vcf	ebi-a-GCST90001924	CD127 on CD28+ CD4+ T cell	40.538	91	0.999999
ieu-b-85.vcf	ebi-a-GCST90001977	FSC-A on HLA DR+ CD4+ T cell	47.095	91	0.999961
ieu-b-85.vcf	ebi-a-GCST90001977	FSC-A on HLA DR+ CD4+ T cell	47.1994	92	0.999971
ieu-b-85.vcf	ebi-a-GCST90001958	CD4 on monocyte	33.1274	88	1
ieu-b-85.vcf	ebi-a-GCST90001958	CD4 on monocyte	33.1656	89	1
ieu-b-85.vcf	ebi-a-GCST90001431	IgD+ CD38- B cell %lymphocyte	42.0158	85	0.999975
ieu-b-85.vcf	ebi-a-GCST90001431	IgD+ CD38- B cell %lymphocyte	42.526	86	0.999978
ieu-b-85.vcf	ebi-a-GCST90001597	CD8dim T cell %T cell	46.7572	93	0.999984
ieu-b-85.vcf	ebi-a-GCST90001597	CD8dim T cell %T cell	46.7717	94	0.999989
ieu-b-85.vcf	ebi-a-GCST90001481	Resting CD4 regulatory T cell %CD4 regulatory T cell	35.4809	89	1
ieu-b-85.vcf	ebi-a-GCST90001481	Resting CD4 regulatory T cell %CD4 regulatory T cell	35.4832	90	1
ieu-b-85.vcf	ebi-a-GCST90001706	BAFF-R on IgD+ CD38- naive B cell	19.4644	70	1
ieu-b-85.vcf	ebi-a-GCST90001706	BAFF-R on IgD+ CD38- naive B cell	19.7823	71	1
ieu-b-85.vcf	ebi-a-GCST90001532	Basophil Absolute Count	26.9191	82	1
ieu-b-85.vcf	ebi-a-GCST90001532	Basophil Absolute Count	27.5694	83	1
ieu-b-85.vcf	ebi-a-GCST90001611	CD4+ CD8dim T cell %leukocyte	39.8912	98	1
ieu-b-85.vcf	ebi-a-GCST90001611	CD4+ CD8dim T cell %leukocyte	39.9047	99	1
ieu-b-85.vcf	ebi-a-GCST90002005	CD16 on CD14+ CD16+ monocyte	45.6049	94	0.999994
ieu-b-85.vcf	ebi-a-GCST90002005	CD16 on CD14+ CD16+ monocyte	46.859	95	0.999992
ieu-b-85.vcf	ebi-a-GCST90002016	CCR2 on CD62L+ plasmacytoid Dendritic Cell	32.5447	85	1
ieu-b-85.vcf	ebi-a-GCST90002016	CCR2 on CD62L+ plasmacytoid Dendritic Cell	33.356	86	1
ieu-b-85.vcf	ebi-a-GCST90001649	HLA DR+ Natural Killer %Natural Killer	45.0769	87	0.999942
ieu-b-85.vcf	ebi-a-GCST90001649	HLA DR+ Natural Killer %Natural Killer	45.3964	88	0.999952
ieu-b-85.vcf	ebi-a-GCST90001608	CD4+CD8+ T cell %leukocyte	42.317	92	0.999998
ieu-b-85.vcf	ebi-a-GCST90001608	CD4+CD8+ T cell %leukocyte	42.5579	93	0.999998
ieu-b-85.vcf	ebi-a-GCST90002120	CD8 on CD28- CD8+ T cell	41.6584	78	0.999759
ieu-b-85.vcf	ebi-a-GCST90002120	CD8 on CD28- CD8+ T cell	41.7201	79	0.999823
ieu-b-85.vcf	ebi-a-GCST90001572	Terminally Differentiated CD4-CD8- T cell Absolute Count	34.5135	85	1
ieu-b-85.vcf	ebi-a-GCST90001572	Terminally Differentiated CD4-CD8- T cell Absolute Count	34.6689	86	1
ieu-b-85.vcf	ebi-a-GCST90001889	CD28 on activated & secreting CD4 regulatory T cell	37.6568	95	1
ieu-b-85.vcf	ebi-a-GCST90001889	CD28 on activated & secreting CD4 regulatory T cell	37.702	96	1
ieu-b-85.vcf	ebi-a-GCST90001766	CD24 on IgD+ CD38- B cell	38.4118	89	0.999999
ieu-b-85.vcf	ebi-a-GCST90001766	CD24 on IgD+ CD38- B cell	38.5649	90	1
ieu-b-85.vcf	ebi-a-GCST90002107	HLA DR on Hematopoietic Stem Cell	5.84724	18	0.996778
ieu-b-85.vcf	ebi-a-GCST90002107	HLA DR on Hematopoietic Stem Cell	8.08953	19	0.985747
ieu-b-85.vcf	ebi-a-GCST90001455	CD62L- HLA DR++ monocyte %monocyte	39.1262	88	0.999999
ieu-b-85.vcf	ebi-a-GCST90001455	CD62L- HLA DR++ monocyte %monocyte	39.4459	89	0.999999
ieu-b-85.vcf	ebi-a-GCST90001726	CD19 on IgD+ CD38- B cell	41.4868	88	0.999994
ieu-b-85.vcf	ebi-a-GCST90001726	CD19 on IgD+ CD38- B cell	41.997	89	0.999995
ieu-b-85.vcf	ebi-a-GCST90002071	SSC-A on myeloid Dendritic Cell	31.0457	82	1
ieu-b-85.vcf	ebi-a-GCST90002071	SSC-A on myeloid Dendritic Cell	31.6224	83	1
ieu-b-85.vcf	ebi-a-GCST90001427	IgD- CD38- B cell %lymphocyte	45.9051	94	0.999993
ieu-b-85.vcf	ebi-a-GCST90001427	IgD- CD38- B cell %lymphocyte	46.155	95	0.999994
ieu-b-85.vcf	ebi-a-GCST90002113	HLA DR on HLA DR+ T cell	42.4169	89	0.999993
ieu-b-85.vcf	ebi-a-GCST90002113	HLA DR on HLA DR+ T cell	43.3546	90	0.999992
ieu-b-85.vcf	ebi-a-GCST90001712	BAFF-R on IgD- CD38- B cell	44.4764	91	0.99999
ieu-b-85.vcf	ebi-a-GCST90001712	BAFF-R on IgD- CD38- B cell	44.7118	92	0.999992
ieu-b-85.vcf	ebi-a-GCST90001935	CD25 on CD39+ CD4 regulatory T cell	42.8416	88	0.999987
ieu-b-85.vcf	ebi-a-GCST90001935	CD25 on CD39+ CD4 regulatory T cell	47.3666	89	0.999914
ieu-b-85.vcf	ebi-a-GCST90002033	CD39 on granulocyte	51.0033	93	0.99988
ieu-b-85.vcf	ebi-a-GCST90002033	CD39 on granulocyte	52.0739	94	0.999862
ieu-b-85.vcf	ebi-a-GCST90001722	CD19 on CD20- CD38- B cell	39.6908	90	0.999999
ieu-b-85.vcf	ebi-a-GCST90001722	CD19 on CD20- CD38- B cell	39.8655	91	0.999999
ieu-b-85.vcf	ebi-a-GCST90002023	CD4 on Central Memory CD4+ T cell	34.556	84	1
ieu-b-85.vcf	ebi-a-GCST90002023	CD4 on Central Memory CD4+ T cell	35.5728	85	1
ieu-b-85.vcf	ebi-a-GCST90002008	CCR2 on monocyte	52.4491	93	0.99978
ieu-b-85.vcf	ebi-a-GCST90002008	CCR2 on monocyte	52.4725	94	0.999836
ieu-b-85.vcf	ebi-a-GCST90001787	CD25 on IgD- CD38- B cell	52.2044	98	0.999959
ieu-b-85.vcf	ebi-a-GCST90001787	CD25 on IgD- CD38- B cell	52.2283	99	0.999971
ieu-b-85.vcf	ebi-a-GCST90002117	HLA DR on HLA DR+ Natural Killer	34.2076	88	1
ieu-b-85.vcf	ebi-a-GCST90002117	HLA DR on HLA DR+ Natural Killer	34.2307	89	1
ieu-b-85.vcf	ebi-a-GCST90002064	CD4 on resting CD4 regulatory T cell	35.4837	91	1
ieu-b-85.vcf	ebi-a-GCST90002064	CD4 on resting CD4 regulatory T cell	36.2591	92	1
ieu-b-85.vcf	ebi-a-GCST90001809	CD38 on CD20- B cell	52.7167	92	0.99967
ieu-b-85.vcf	ebi-a-GCST90001809	CD38 on CD20- B cell	53.1169	93	0.999712
ieu-b-85.vcf	ebi-a-GCST90001672	CD39+ CD8+ T cell Absolute Count	38.5896	85	0.999997
ieu-b-85.vcf	ebi-a-GCST90001672	CD39+ CD8+ T cell Absolute Count	38.6022	86	0.999998
ieu-b-85.vcf	ebi-a-GCST90001463	CD62L- Dendritic Cell %Dendritic Cell	44.4261	94	0.999997
ieu-b-85.vcf	ebi-a-GCST90001463	CD62L- Dendritic Cell %Dendritic Cell	44.4274	95	0.999998
ieu-b-85.vcf	ebi-a-GCST90001707	BAFF-R on IgD+ CD38- unswitched memory B cell	21.3394	69	1
ieu-b-85.vcf	ebi-a-GCST90001707	BAFF-R on IgD+ CD38- unswitched memory B cell	21.416	70	1
ieu-b-85.vcf	ebi-a-GCST90001655	CD28+ CD4-CD8- T cell %T cell	43.091	89	0.99999
ieu-b-85.vcf	ebi-a-GCST90001655	CD28+ CD4-CD8- T cell %T cell	43.139	90	0.999993
ieu-b-85.vcf	ebi-a-GCST90001412	IgD+ CD24+ B cell Absolute Count	35.5577	90	1
ieu-b-85.vcf	ebi-a-GCST90001412	IgD+ CD24+ B cell Absolute Count	36.0719	91	1
ieu-b-85.vcf	ebi-a-GCST90001687	CD28- CD8+ T cell Absolute Count	48.5794	93	0.99996
ieu-b-85.vcf	ebi-a-GCST90001687	CD28- CD8+ T cell Absolute Count	50.9184	94	0.999916
ieu-b-85.vcf	ebi-a-GCST90001856	CD3 on CD39+ secreting CD4 regulatory T cell	38.816	92	1
ieu-b-85.vcf	ebi-a-GCST90001856	CD3 on CD39+ secreting CD4 regulatory T cell	39.0147	93	1
ieu-b-85.vcf	ebi-a-GCST90001696	CD45RA- CD28- CD8+ T cell %CD8+ T cell	53.3538	92	0.999576
ieu-b-85.vcf	ebi-a-GCST90001696	CD45RA- CD28- CD8+ T cell %CD8+ T cell	53.4997	93	0.999665
ieu-b-85.vcf	ebi-a-GCST90001448	CD11c+ monocyte Absolute Count	43.1553	92	0.999997
ieu-b-85.vcf	ebi-a-GCST90001448	CD11c+ monocyte Absolute Count	44.502	93	0.999995
ieu-b-85.vcf	ebi-a-GCST90001665	CD28+ CD45RA+ CD8dim T cell %CD8dim T cell	48.1753	94	0.999977
ieu-b-85.vcf	ebi-a-GCST90001665	CD28+ CD45RA+ CD8dim T cell %CD8dim T cell	49.6511	95	0.999966
ieu-b-85.vcf	ebi-a-GCST90002057	CD8 on Terminally Differentiated CD8+ T cell	45.7316	88	0.999944
ieu-b-85.vcf	ebi-a-GCST90002057	CD8 on Terminally Differentiated CD8+ T cell	45.7425	89	0.99996
ieu-b-85.vcf	ebi-a-GCST90001916	CD45 on CD4+ T cell	36.4846	95	1
ieu-b-85.vcf	ebi-a-GCST90001916	CD45 on CD4+ T cell	37.7814	96	1
ieu-b-85.vcf	ebi-a-GCST90001519	CD33+ HLA DR+ CD14- %CD33+ HLA DR+	20.1643	61	1
ieu-b-85.vcf	ebi-a-GCST90001519	CD33+ HLA DR+ CD14- %CD33+ HLA DR+	21.6595	62	1
ieu-b-85.vcf	ebi-a-GCST90001748	CD20 on IgD+ CD38- B cell	42.7556	95	0.999999
ieu-b-85.vcf	ebi-a-GCST90001748	CD20 on IgD+ CD38- B cell	43.0946	96	0.999999
ieu-b-85.vcf	ebi-a-GCST90001479	CD4 regulatory T cell %T cell	36.8783	92	1
ieu-b-85.vcf	ebi-a-GCST90001479	CD4 regulatory T cell %T cell	36.9836	93	1
ieu-b-85.vcf	ebi-a-GCST90001634	CD8dim Natural Killer T %T cell	44.1366	90	0.999988
ieu-b-85.vcf	ebi-a-GCST90001634	CD8dim Natural Killer T %T cell	44.4036	91	0.99999
ieu-b-85.vcf	ebi-a-GCST90001529	CD66b++ myeloid cell Absolute Count	26.0365	77	1
ieu-b-85.vcf	ebi-a-GCST90001529	CD66b++ myeloid cell Absolute Count	26.0394	78	1
ieu-b-85.vcf	ebi-a-GCST90001451	CD62L- monocyte %monocyte	31.6541	88	1
ieu-b-85.vcf	ebi-a-GCST90001451	CD62L- monocyte %monocyte	31.6575	89	1
ieu-b-85.vcf	ebi-a-GCST90002070	CD4 on activated & secreting CD4 regulatory T cell	40.9292	92	0.999999
ieu-b-85.vcf	ebi-a-GCST90002070	CD4 on activated & secreting CD4 regulatory T cell	41.4482	93	0.999999
ieu-b-85.vcf	ebi-a-GCST90001752	CD20 on IgD+ CD38dim B cell	41.0835	89	0.999997
ieu-b-85.vcf	ebi-a-GCST90001752	CD20 on IgD+ CD38dim B cell	41.0947	90	0.999998
ieu-b-85.vcf	ebi-a-GCST90001513	CD4 regulatory T cell Absolute Count	41.7091	89	0.999995
ieu-b-85.vcf	ebi-a-GCST90001513	CD4 regulatory T cell Absolute Count	41.7264	90	0.999997
ieu-b-85.vcf	ebi-a-GCST90001816	CD38 on naive-mature B cell	44.4741	87	0.999957
ieu-b-85.vcf	ebi-a-GCST90001816	CD38 on naive-mature B cell	44.4768	88	0.99997
ieu-b-85.vcf	ebi-a-GCST90001940	CD25 on CD39+ activated CD4 regulatory T cell	49.245	91	0.999895
ieu-b-85.vcf	ebi-a-GCST90001940	CD25 on CD39+ activated CD4 regulatory T cell	51.2408	92	0.999819
ieu-b-85.vcf	ebi-a-GCST90001756	CD20 on IgD- CD38+ B cell	43.3565	89	0.999988
ieu-b-85.vcf	ebi-a-GCST90001756	CD20 on IgD- CD38+ B cell	45.331	90	0.999977
ieu-b-85.vcf	ebi-a-GCST90001692	CD28+ CD45RA- CD8+ T cell %CD8+ T cell	45.493	91	0.999983
ieu-b-85.vcf	ebi-a-GCST90001692	CD28+ CD45RA- CD8+ T cell %CD8+ T cell	45.7323	92	0.999986
ieu-b-85.vcf	ebi-a-GCST90001965	FSC-A on monocyte	27.9925	93	1
ieu-b-85.vcf	ebi-a-GCST90001965	FSC-A on monocyte	27.9937	94	1
ieu-b-85.vcf	ebi-a-GCST90001647	Natural Killer %lymphocyte	56.2024	98	0.999778
ieu-b-85.vcf	ebi-a-GCST90001647	Natural Killer %lymphocyte	56.2367	99	0.999833
ieu-b-85.vcf	ebi-a-GCST90001807	CD27 on Plasma Blast-Plasma Cell	47.4417	95	0.999989
ieu-b-85.vcf	ebi-a-GCST90001807	CD27 on Plasma Blast-Plasma Cell	48.1679	96	0.999989
ieu-b-85.vcf	ebi-a-GCST90002063	CD4 on CD4 regulatory T cell	33.7818	87	1
ieu-b-85.vcf	ebi-a-GCST90002063	CD4 on CD4 regulatory T cell	34.1302	88	1
ieu-b-85.vcf	ebi-a-GCST90001406	Memory B cell %B cell	41.4354	85	0.999982
ieu-b-85.vcf	ebi-a-GCST90001406	Memory B cell %B cell	41.5553	86	0.999987
ieu-b-85.vcf	ebi-a-GCST90001853	CD3 on activated CD4 regulatory T cell	35.5391	86	1
ieu-b-85.vcf	ebi-a-GCST90001853	CD3 on activated CD4 regulatory T cell	36.0097	87	1
ieu-b-85.vcf	ebi-a-GCST90001419	CD20- B cell %B cell	52.1026	87	0.998905
ieu-b-85.vcf	ebi-a-GCST90001419	CD20- B cell %B cell	52.4109	88	0.999072
ieu-b-85.vcf	ebi-a-GCST90001421	CD20- B cell Absolute Count	50.3281	86	0.999245
ieu-b-85.vcf	ebi-a-GCST90001421	CD20- B cell Absolute Count	50.8618	87	0.999307
ieu-b-85.vcf	ebi-a-GCST90002027	CD4 on CD45RA+ CD4+ T cell	38.3417	82	0.99999
ieu-b-85.vcf	ebi-a-GCST90002027	CD4 on CD45RA+ CD4+ T cell	38.4228	83	0.999993
ieu-b-85.vcf	ebi-a-GCST90001843	CD3 on Effector Memory CD4+ T cell	38.5709	85	0.999997
ieu-b-85.vcf	ebi-a-GCST90001843	CD3 on Effector Memory CD4+ T cell	38.5709	86	0.999998
ieu-b-85.vcf	ebi-a-GCST90001658	CD39+ CD4+ T cell %T cell	54.5356	100	0.99994
ieu-b-85.vcf	ebi-a-GCST90001658	CD39+ CD4+ T cell %T cell	54.848	101	0.99995
ieu-b-85.vcf	ebi-a-GCST90001484	CD39+ resting CD4 regulatory T cell %resting CD4 regulatory T cell	36.9965	98	1
ieu-b-85.vcf	ebi-a-GCST90001484	CD39+ resting CD4 regulatory T cell %resting CD4 regulatory T cell	37.9056	99	1
ieu-b-85.vcf	ebi-a-GCST90002048	CD45 on CD66b++ myelod cell	17.6033	61	1
ieu-b-85.vcf	ebi-a-GCST90002048	CD45 on CD66b++ myelod cell	17.7044	62	1
ieu-b-85.vcf	ebi-a-GCST90001963	FSC-A on myeloid Dendritic Cell	38.5243	74	0.999788
ieu-b-85.vcf	ebi-a-GCST90001963	FSC-A on myeloid Dendritic Cell	38.9176	75	0.999818
ieu-b-85.vcf	ebi-a-GCST90001476	HLA DR++ monocyte %leukocyte	45.8003	94	0.999993
ieu-b-85.vcf	ebi-a-GCST90001476	HLA DR++ monocyte %leukocyte	45.9561	95	0.999995
ieu-b-85.vcf	ebi-a-GCST90001887	CD28 on secreting CD4 regulatory T cell	44.3189	94	0.999997
ieu-b-85.vcf	ebi-a-GCST90001887	CD28 on secreting CD4 regulatory T cell	44.3611	95	0.999998
ieu-b-85.vcf	ebi-a-GCST90001926	CD127 on granulocyte	44.0848	93	0.999996
ieu-b-85.vcf	ebi-a-GCST90001926	CD127 on granulocyte	44.5284	94	0.999997
ieu-b-85.vcf	ebi-a-GCST90001723	CD19 on CD24+ CD27+ B cell	46.6004	95	0.999993
ieu-b-85.vcf	ebi-a-GCST90001723	CD19 on CD24+ CD27+ B cell	47.1474	96	0.999993
ieu-b-85.vcf	ebi-a-GCST90001399	IgD- CD27- B cell %B cell	52.4494	92	0.999703
ieu-b-85.vcf	ebi-a-GCST90001399	IgD- CD27- B cell %B cell	52.4656	93	0.999779
ieu-b-85.vcf	ebi-a-GCST90001467	CD86+ plasmacytoid Dendritic Cell %Dendritic Cell	39.1087	86	0.999997
ieu-b-85.vcf	ebi-a-GCST90001467	CD86+ plasmacytoid Dendritic Cell %Dendritic Cell	39.1092	87	0.999998
ieu-b-85.vcf	ebi-a-GCST90001659	CD39+ CD4+ T cell %CD4+ T cell	46.6986	97	0.999996
ieu-b-85.vcf	ebi-a-GCST90001659	CD39+ CD4+ T cell %CD4+ T cell	47.9035	98	0.999995
ieu-b-85.vcf	ebi-a-GCST90001401	IgD- CD27- B cell Absolute Count	49.8759	93	0.999927
ieu-b-85.vcf	ebi-a-GCST90001401	IgD- CD27- B cell Absolute Count	49.9117	94	0.999947
ieu-b-85.vcf	ebi-a-GCST90002028	CD19 on B cell	36.844	86	0.999999
ieu-b-85.vcf	ebi-a-GCST90002028	CD19 on B cell	38.5318	87	0.999999
ieu-b-85.vcf	ebi-a-GCST90002081	SSC-A on CD4+ T cell	26.656	85	1
ieu-b-85.vcf	ebi-a-GCST90002081	SSC-A on CD4+ T cell	26.6787	86	1
ieu-b-85.vcf	ebi-a-GCST90001453	CD11c+ CD62L- monocyte %monocyte	34.1187	85	1
ieu-b-85.vcf	ebi-a-GCST90001453	CD11c+ CD62L- monocyte %monocyte	35.1839	86	1
ieu-b-85.vcf	ebi-a-GCST90001954	CD33 on basophil	21.6957	68	1
ieu-b-85.vcf	ebi-a-GCST90001954	CD33 on basophil	22.3446	69	1
ieu-b-85.vcf	ebi-a-GCST90001927	CD127 on CD8+ T cell	37.2457	88	1
ieu-b-85.vcf	ebi-a-GCST90001927	CD127 on CD8+ T cell	37.997	89	1
ieu-b-85.vcf	ebi-a-GCST90001758	CD20 on memory B cell	43.9145	96	0.999999
ieu-b-85.vcf	ebi-a-GCST90001758	CD20 on memory B cell	44.0521	97	0.999999
ieu-b-85.vcf	ebi-a-GCST90001598	CD4-CD8- T cell Absolute Count	39.6326	93	1
ieu-b-85.vcf	ebi-a-GCST90001598	CD4-CD8- T cell Absolute Count	41.3301	94	1
ieu-b-85.vcf	ebi-a-GCST90001434	Switched memory B cell %lymphocyte	47.2896	93	0.999979
ieu-b-85.vcf	ebi-a-GCST90001434	Switched memory B cell %lymphocyte	48.4041	94	0.999974
ieu-b-85.vcf	ebi-a-GCST90002049	CD45 on Monocytic Myeloid-Derived Suppressor Cells	21.7133	78	1
ieu-b-85.vcf	ebi-a-GCST90002049	CD45 on Monocytic Myeloid-Derived Suppressor Cells	21.9348	79	1
ieu-b-85.vcf	ebi-a-GCST90001961	CD25 on CD39+ CD4+ T cell	33.4979	89	1
ieu-b-85.vcf	ebi-a-GCST90001961	CD25 on CD39+ CD4+ T cell	33.6961	90	1
ieu-b-85.vcf	ebi-a-GCST90001939	CD25 on activated CD4 regulatory T cell	51.2467	86	0.998939
ieu-b-85.vcf	ebi-a-GCST90001939	CD25 on activated CD4 regulatory T cell	54.5362	87	0.99749
ieu-b-85.vcf	ebi-a-GCST90001750	CD20 on IgD+ CD38- unswitched memory B cell	23.409	77	1
ieu-b-85.vcf	ebi-a-GCST90001750	CD20 on IgD+ CD38- unswitched memory B cell	23.5153	78	1
ieu-b-85.vcf	ebi-a-GCST90001724	CD19 on IgD+ CD24+ B cell	40.1546	90	0.999999
ieu-b-85.vcf	ebi-a-GCST90001724	CD19 on IgD+ CD24+ B cell	40.155	91	0.999999
ieu-b-85.vcf	ebi-a-GCST90001966	FSC-A on granulocyte	40.7171	90	0.999998
ieu-b-85.vcf	ebi-a-GCST90001966	FSC-A on granulocyte	40.8715	91	0.999999
ieu-b-85.vcf	ebi-a-GCST90001745	CD20 on CD24+ CD27+ B cell	38.3203	92	1
ieu-b-85.vcf	ebi-a-GCST90001745	CD20 on CD24+ CD27+ B cell	38.4267	93	1
ieu-b-85.vcf	ebi-a-GCST90001457	CD11c+ HLA DR++ monocyte %monocyte	37.329	83	0.999996
ieu-b-85.vcf	ebi-a-GCST90001457	CD11c+ HLA DR++ monocyte %monocyte	37.783	84	0.999997
ieu-b-85.vcf	ebi-a-GCST90001683	CD127- CD8+ T cell %CD8+ T cell	46.136	85	0.999816
ieu-b-85.vcf	ebi-a-GCST90001683	CD127- CD8+ T cell %CD8+ T cell	46.4356	86	0.999848
ieu-b-85.vcf	ebi-a-GCST90001796	CD27 on CD20- B cell	50.5513	97	0.999974
ieu-b-85.vcf	ebi-a-GCST90001796	CD27 on CD20- B cell	50.8703	98	0.999978
ieu-b-85.vcf	ebi-a-GCST90001814	CD38 on IgD- CD38+ B cell	41.8499	86	0.999984
ieu-b-85.vcf	ebi-a-GCST90001814	CD38 on IgD- CD38+ B cell	41.9644	87	0.999989
ieu-b-85.vcf	ebi-a-GCST90002009	HLA DR on CD14- CD16-	36.6752	96	1
ieu-b-85.vcf	ebi-a-GCST90002009	HLA DR on CD14- CD16-	37.2689	97	1
ieu-b-85.vcf	ebi-a-GCST90001922	CD127 on T cell	42.5653	84	0.999953
ieu-b-85.vcf	ebi-a-GCST90001922	CD127 on T cell	43.971	85	0.999933
ieu-b-85.vcf	ebi-a-GCST90001801	CD27 on IgD+ CD38- unswitched memory B cell	23.8038	74	1
ieu-b-85.vcf	ebi-a-GCST90001801	CD27 on IgD+ CD38- unswitched memory B cell	23.8242	75	1
ieu-b-85.vcf	ebi-a-GCST90001842	CD3 on Naive CD4+ T cell	32.5023	83	1
ieu-b-85.vcf	ebi-a-GCST90001842	CD3 on Naive CD4+ T cell	34.3703	84	1
ieu-b-85.vcf	ebi-a-GCST90002012	CX3CR1 on CD14- CD16+ monocyte	38.0923	92	1
ieu-b-85.vcf	ebi-a-GCST90002012	CX3CR1 on CD14- CD16+ monocyte	38.2849	93	1
ieu-b-85.vcf	ebi-a-GCST90002115	HLA DR on HLA DR+ CD8+ T cell	55.5199	90	0.9984
ieu-b-85.vcf	ebi-a-GCST90002115	HLA DR on HLA DR+ CD8+ T cell	55.896	91	0.998603
ieu-b-85.vcf	ebi-a-GCST90001496	CD39+ secreting CD4 regulatory T cell %secreting CD4 regulatory T cell	33.6865	91	1
ieu-b-85.vcf	ebi-a-GCST90001496	CD39+ secreting CD4 regulatory T cell %secreting CD4 regulatory T cell	33.9349	92	1
ieu-b-85.vcf	ebi-a-GCST90001600	Leukocyte Absolute Count	12.393	24	0.975108
ieu-b-85.vcf	ebi-a-GCST90001600	Leukocyte Absolute Count	12.6426	25	0.980588
ieu-b-85.vcf	ebi-a-GCST90001523	CD33- HLA DR+ Absolute Count	23.5991	83	1
ieu-b-85.vcf	ebi-a-GCST90001523	CD33- HLA DR+ Absolute Count	23.6139	84	1
ieu-b-85.vcf	ebi-a-GCST90002056	CD8 on Effector Memory CD8+ T cell	39.5441	91	0.999999
ieu-b-85.vcf	ebi-a-GCST90002056	CD8 on Effector Memory CD8+ T cell	39.6256	92	1
ieu-b-85.vcf	ebi-a-GCST90001792	CD25 on unswitched memory B cell	39.302	93	1
ieu-b-85.vcf	ebi-a-GCST90001792	CD25 on unswitched memory B cell	39.4223	94	1
ieu-b-85.vcf	ebi-a-GCST90002106	HLA DR on Dendritic Cell	34.9167	91	1
ieu-b-85.vcf	ebi-a-GCST90002106	HLA DR on Dendritic Cell	35.2485	92	1
ieu-b-85.vcf	ebi-a-GCST90001738	CD19 on unswitched memory B cell	46.5602	92	0.999979
ieu-b-85.vcf	ebi-a-GCST90001738	CD19 on unswitched memory B cell	46.7541	93	0.999984
ieu-b-85.vcf	ebi-a-GCST90001439	IgD+ CD24+ B cell %lymphocyte	42.0362	93	0.999999
ieu-b-85.vcf	ebi-a-GCST90001439	IgD+ CD24+ B cell %lymphocyte	42.1209	94	0.999999
ieu-b-85.vcf	ebi-a-GCST90001517	CD33+ HLA DR+ Absolute Count	32.3019	70	0.999968
ieu-b-85.vcf	ebi-a-GCST90001517	CD33+ HLA DR+ Absolute Count	32.4587	71	0.999976
ieu-b-85.vcf	ebi-a-GCST90001547	Terminally Differentiated CD4+ T cell %T cell	48.8311	94	0.999968
ieu-b-85.vcf	ebi-a-GCST90001547	Terminally Differentiated CD4+ T cell %T cell	48.8429	95	0.999977
ieu-b-85.vcf	ebi-a-GCST90001662	CD28- CD8dim T cell %CD8dim T cell	46.3839	94	0.999991
ieu-b-85.vcf	ebi-a-GCST90001662	CD28- CD8dim T cell %CD8dim T cell	47.6492	95	0.999988
ieu-b-85.vcf	ebi-a-GCST90001739	CD19 on Plasma Blast-Plasma Cell	53.6848	95	0.999801
ieu-b-85.vcf	ebi-a-GCST90001739	CD19 on Plasma Blast-Plasma Cell	54.1361	96	0.999824
ieu-b-85.vcf	ebi-a-GCST90001443	CD20- B cell %lymphocyte	61.6403	93	0.994979
ieu-b-85.vcf	ebi-a-GCST90001443	CD20- B cell %lymphocyte	61.706	94	0.995933
ieu-b-85.vcf	ebi-a-GCST90001681	CD25++ CD8+ T cell Absolute Count	42.4942	84	0.999954
ieu-b-85.vcf	ebi-a-GCST90001681	CD25++ CD8+ T cell Absolute Count	42.7866	85	0.999963
ieu-b-85.vcf	ebi-a-GCST90001631	CD8+ Natural Killer T %T cell	53.3634	94	0.999764
ieu-b-85.vcf	ebi-a-GCST90001631	CD8+ Natural Killer T %T cell	55.2258	95	0.999636
ieu-b-85.vcf	ebi-a-GCST90001590	CD4+ T cell Absolute Count	43.1117	98	1
ieu-b-85.vcf	ebi-a-GCST90001590	CD4+ T cell Absolute Count	43.332	99	1
ieu-b-85.vcf	ebi-a-GCST90001945	CD123 on CD62L+ plasmacytoid Dendritic Cell	25.2061	79	1
ieu-b-85.vcf	ebi-a-GCST90001945	CD123 on CD62L+ plasmacytoid Dendritic Cell	25.3095	80	1
ieu-b-85.vcf	ebi-a-GCST90001971	FSC-A on lymphocyte	38.6603	92	1
ieu-b-85.vcf	ebi-a-GCST90001971	FSC-A on lymphocyte	38.6604	93	1
ieu-b-85.vcf	ebi-a-GCST90001823	IgD on IgD+ CD38- unswitched memory B cell	21.064	70	1
ieu-b-85.vcf	ebi-a-GCST90001823	IgD on IgD+ CD38- unswitched memory B cell	22.4677	71	1
ieu-b-85.vcf	ebi-a-GCST90001737	CD19 on naive-mature B cell	37.5708	91	1
ieu-b-85.vcf	ebi-a-GCST90001737	CD19 on naive-mature B cell	37.5824	92	1
ieu-b-85.vcf	ebi-a-GCST90001987	CD64 on CD14+ CD16- monocyte	44.7626	101	1
ieu-b-85.vcf	ebi-a-GCST90001987	CD64 on CD14+ CD16- monocyte	44.8766	102	1
ieu-b-85.vcf	ebi-a-GCST90001492	Secreting CD4 regulatory T cell Absolute Count	33.4278	89	1
ieu-b-85.vcf	ebi-a-GCST90001492	Secreting CD4 regulatory T cell Absolute Count	33.4286	90	1
ieu-b-85.vcf	ebi-a-GCST90001803	CD27 on IgD- CD38+ B cell	40.6903	93	1
ieu-b-85.vcf	ebi-a-GCST90001803	CD27 on IgD- CD38+ B cell	41.9513	94	0.999999
ieu-b-85.vcf	ebi-a-GCST90002079	SSC-A on lymphocyte	35.1698	88	1
ieu-b-85.vcf	ebi-a-GCST90002079	SSC-A on lymphocyte	35.2426	89	1
ieu-b-85.vcf	ebi-a-GCST90001990	CD64 on CD14- CD16+ monocyte	50.8145	91	0.999793
ieu-b-85.vcf	ebi-a-GCST90001990	CD64 on CD14- CD16+ monocyte	50.9056	92	0.999843
ieu-b-85.vcf	ebi-a-GCST90001577	Transitional B cell Absolute Count	41.1969	90	0.999998
ieu-b-85.vcf	ebi-a-GCST90001577	Transitional B cell Absolute Count	41.197	91	0.999999
ieu-b-85.vcf	ebi-a-GCST90001881	HVEM on CD8+ T cell	17.481	61	1
ieu-b-85.vcf	ebi-a-GCST90001881	HVEM on CD8+ T cell	17.644	62	1
ieu-b-85.vcf	ebi-a-GCST90001622	Natural Killer T %T cell	45.036	95	0.999997
ieu-b-85.vcf	ebi-a-GCST90001622	Natural Killer T %T cell	45.5406	96	0.999997
ieu-b-85.vcf	ebi-a-GCST90001489	CD39+ activated CD4 regulatory T cell Absolute Count	47.125	92	0.999972
ieu-b-85.vcf	ebi-a-GCST90001489	CD39+ activated CD4 regulatory T cell Absolute Count	47.2379	93	0.999979
ieu-b-85.vcf	ebi-a-GCST90001560	CD45RA+ CD8+ T cell Absolute Count	53.4987	98	0.999928
ieu-b-85.vcf	ebi-a-GCST90001560	CD45RA+ CD8+ T cell Absolute Count	53.7919	99	0.99994
ieu-b-85.vcf	ebi-a-GCST90001976	FSC-A on Natural Killer T	39.8531	89	0.999999
ieu-b-85.vcf	ebi-a-GCST90001976	FSC-A on Natural Killer T	40.744	90	0.999998
ieu-b-85.vcf	ebi-a-GCST90001685	CD28- CD8+ T cell %T cell	47.5694	90	0.999932
ieu-b-85.vcf	ebi-a-GCST90001685	CD28- CD8+ T cell %T cell	47.7254	91	0.999948
ieu-b-85.vcf	ebi-a-GCST90001708	BAFF-R on IgD+ CD38+ B cell	47.6901	88	0.999861
ieu-b-85.vcf	ebi-a-GCST90001708	BAFF-R on IgD+ CD38+ B cell	47.7752	89	0.999896
ieu-b-85.vcf	ebi-a-GCST90001394	IgD+ CD38dim B cell Absolute Count	48.9236	92	0.999935
ieu-b-85.vcf	ebi-a-GCST90001394	IgD+ CD38dim B cell Absolute Count	49.1478	93	0.999948
ieu-b-85.vcf	ebi-a-GCST90001875	HVEM on CD4+ T cell	16.6697	63	1
ieu-b-85.vcf	ebi-a-GCST90001875	HVEM on CD4+ T cell	16.7159	64	1
ieu-b-85.vcf	ebi-a-GCST90001530	Monocytic Myeloid-Derived Suppressor Cells Absolute Count	27.5423	77	1
ieu-b-85.vcf	ebi-a-GCST90001530	Monocytic Myeloid-Derived Suppressor Cells Absolute Count	28.0354	78	1
ieu-b-85.vcf	ebi-a-GCST90001440	IgD- CD24- B cell %lymphocyte	38.1856	93	1
ieu-b-85.vcf	ebi-a-GCST90001440	IgD- CD24- B cell %lymphocyte	38.4931	94	1
ieu-b-85.vcf	ebi-a-GCST90001698	CD45RA+ CD28- CD8+ T cell Absolute Count	35.2491	89	1
ieu-b-85.vcf	ebi-a-GCST90001698	CD45RA+ CD28- CD8+ T cell Absolute Count	38.0891	90	1
ieu-b-85.vcf	ebi-a-GCST90002052	CD45 on Immature Myeloid-Derived Suppressor Cells	22.6877	78	1
ieu-b-85.vcf	ebi-a-GCST90002052	CD45 on Immature Myeloid-Derived Suppressor Cells	22.8283	79	1
ieu-b-85.vcf	ebi-a-GCST90001591	CD4+ T cell %T cell	48.363	97	0.999991
ieu-b-85.vcf	ebi-a-GCST90001591	CD4+ T cell %T cell	49.5253	98	0.999989
ieu-b-85.vcf	ebi-a-GCST90001398	Unswitched memory B cell Absolute Count	42.8374	95	0.999999
ieu-b-85.vcf	ebi-a-GCST90001398	Unswitched memory B cell Absolute Count	43.4463	96	0.999999
ieu-b-85.vcf	ebi-a-GCST90001743	CD20 on B cell	39.5957	95	1
ieu-b-85.vcf	ebi-a-GCST90001743	CD20 on B cell	39.6351	96	1
ieu-b-85.vcf	ebi-a-GCST90002003	CCR2 on CD14- CD16-	33.1475	90	1
ieu-b-85.vcf	ebi-a-GCST90002003	CCR2 on CD14- CD16-	33.9029	91	1
ieu-b-85.vcf	ebi-a-GCST90001393	IgD+ CD38dim B cell %B cell	41.4963	91	0.999998
ieu-b-85.vcf	ebi-a-GCST90001393	IgD+ CD38dim B cell %B cell	41.9162	92	0.999998
ieu-b-85.vcf	ebi-a-GCST90001488	Activated CD4 regulatory T cell %CD4+ T cell	40.0319	91	0.999999
ieu-b-85.vcf	ebi-a-GCST90001488	Activated CD4 regulatory T cell %CD4+ T cell	41.7546	92	0.999999
ieu-b-85.vcf	ebi-a-GCST90001980	CD40 on CD14+ CD16- monocyte	47.988	98	0.999995
ieu-b-85.vcf	ebi-a-GCST90001980	CD40 on CD14+ CD16- monocyte	48.2546	99	0.999996
ieu-b-85.vcf	ebi-a-GCST90001912	CD45 on HLA DR+ Natural Killer	35.1504	85	1
ieu-b-85.vcf	ebi-a-GCST90001912	CD45 on HLA DR+ Natural Killer	35.2179	86	1
ieu-b-85.vcf	ebi-a-GCST90001531	CD33dim HLA DR- Absolute Count	25.6472	80	1
ieu-b-85.vcf	ebi-a-GCST90001531	CD33dim HLA DR- Absolute Count	26.0605	81	1
ieu-b-85.vcf	ebi-a-GCST90001414	IgD- CD24- B cell Absolute Count	38.0438	90	1
ieu-b-85.vcf	ebi-a-GCST90001414	IgD- CD24- B cell Absolute Count	38.0447	91	1
ieu-b-85.vcf	ebi-a-GCST90001610	CD4+ CD8dim T cell %lymphocyte	45.3999	100	0.999999
ieu-b-85.vcf	ebi-a-GCST90001610	CD4+ CD8dim T cell %lymphocyte	45.4201	101	1
ieu-b-85.vcf	ebi-a-GCST90001765	CD24 on IgD+ CD24+ B cell	46.5574	86	0.99984
ieu-b-85.vcf	ebi-a-GCST90001765	CD24 on IgD+ CD24+ B cell	46.5584	87	0.999884
ieu-b-85.vcf	ebi-a-GCST90001914	CD45 on lymphocyte	40.152	95	1
ieu-b-85.vcf	ebi-a-GCST90001914	CD45 on lymphocyte	40.3547	96	1
