# Supplementary material for: Causal role of immune cells in prostate cancer: a bidirectional Mendelian-randomization analyses
Source: Aging (Albany NY). 2024 Jun 17;16(12):10477–88. doi: 10.18632/aging.205942 (PMC11236311; doi:10.18632/aging.205942)
Supplement: Supplementary Table 8 [file aging-16-205942-s009.xlsx]

## Sheet: Sheet1
Supplementary Table 8. The results of pleiotropy test for PCa on immune cells.
id.exposure	id.outcome	outcome	se	pval
ieu-b-85.vcf	ebi-a-GCST90001852	CD3 on CD39+ resting CD4 regulatory T cell	0.00776663	0.878639
ieu-b-85.vcf	ebi-a-GCST90001946	CD33 on CD14+ monocyte	0.0103119	0.327803
ieu-b-85.vcf	ebi-a-GCST90001957	CD33 on CD33+ HLA DR+ CD14-	0.0113259	0.129255
ieu-b-85.vcf	ebi-a-GCST90001897	CD28 on CD39+ CD8+ T cell	0.00724214	0.348268
ieu-b-85.vcf	ebi-a-GCST90001538	Central Memory CD4+ T cell %CD4+ T cell	0.00669106	0.917167
ieu-b-85.vcf	ebi-a-GCST90001721	CD19 on CD20- B cell	0.00667083	0.721458
ieu-b-85.vcf	ebi-a-GCST90001686	CD28- CD8+ T cell %CD8+ T cell	0.00566921	0.155136
ieu-b-85.vcf	ebi-a-GCST90001682	CD127- CD8+ T cell %T cell	0.00651237	0.423755
ieu-b-85.vcf	ebi-a-GCST90001445	IgD- CD38- B cell %B cell	0.00622761	0.649869
ieu-b-85.vcf	ebi-a-GCST90002041	CD45 on lymphocyte	0.0105217	0.941818
ieu-b-85.vcf	ebi-a-GCST90002093	CD11b on CD66b++ myeloid cell	0.0109002	0.980705
ieu-b-85.vcf	ebi-a-GCST90001923	CD127 on CD45RA- CD4 not regulatory T cell	0.00729192	0.754872
ieu-b-85.vcf	ebi-a-GCST90001968	FSC-A on B cell	0.00697025	0.101881
ieu-b-85.vcf	ebi-a-GCST90001888	CD28 on CD39+ secreting CD4 regulatory T cell	0.00739068	0.479731
ieu-b-85.vcf	ebi-a-GCST90001553	Naive CD8+ T cell %T cell	0.00438253	0.0835808
ieu-b-85.vcf	ebi-a-GCST90001847	CD3 on HLA DR+ T cell	0.00721065	0.861979
ieu-b-85.vcf	ebi-a-GCST90002097	CD11b on CD33+ HLA DR+ CD14dim	0.012	0.674552
ieu-b-85.vcf	ebi-a-GCST90002060	CD8 on HLA DR+ CD8+ T cell	0.00723638	0.739938
ieu-b-85.vcf	ebi-a-GCST90001851	CD3 on T cell	0.00703128	0.89617
ieu-b-85.vcf	ebi-a-GCST90001651	Granulocyte Absolute Count	0.00647182	0.367219
ieu-b-85.vcf	ebi-a-GCST90001900	CD28 on resting CD4 regulatory T cell	0.0150192	0.75065
ieu-b-85.vcf	ebi-a-GCST90001729	CD19 on IgD+ CD38+ B cell	0.00671863	0.523333
ieu-b-85.vcf	ebi-a-GCST90001534	CD45RA- CD4+ T cell Absolute Count	0.00646011	0.795752
ieu-b-85.vcf	ebi-a-GCST90001942	CD25 on CD39+ secreting CD4 regulatory T cell	0.00702056	0.668928
ieu-b-85.vcf	ebi-a-GCST90002010	HLA DR on monocyte	0.00661221	0.665829
ieu-b-85.vcf	ebi-a-GCST90001693	CD28+ CD45RA- CD8+ T cell Absolute Count	0.00636902	0.214662
ieu-b-85.vcf	ebi-a-GCST90002078	SSC-A on granulocyte	0.00693161	0.207297
ieu-b-85.vcf	ebi-a-GCST90001868	CD3 on CD4 regulatory T cell	0.0152829	0.561767
ieu-b-85.vcf	ebi-a-GCST90001422	CD20- CD38- B cell %B cell	0.00637248	0.558014
ieu-b-85.vcf	ebi-a-GCST90002006	CD64 on monocyte	0.00631838	0.567515
ieu-b-85.vcf	ebi-a-GCST90001618	HLA DR+ T cell Absolute Count	0.00656554	0.515919
ieu-b-85.vcf	ebi-a-GCST90001998	PDL-1 on CD14+ CD16+ monocyte	0.00648992	0.464079
ieu-b-85.vcf	ebi-a-GCST90001663	CD28- CD8dim T cell Absolute Count	0.0065717	0.348758
ieu-b-85.vcf	ebi-a-GCST90001908	CCR7 on naive CD8+ T cell	0.00726864	0.414643
ieu-b-85.vcf	ebi-a-GCST90001975	FSC-A on HLA DR+ T cell	0.00690677	0.701221
ieu-b-85.vcf	ebi-a-GCST90001857	CD3 on activated & secreting CD4 regulatory T cell	0.00713706	0.493347
ieu-b-85.vcf	ebi-a-GCST90001728	CD19 on IgD+ CD38- unswitched memory B cell	0.00963801	0.777745
ieu-b-85.vcf	ebi-a-GCST90001437	Naive-mature B cell %lymphocyte	0.00659568	0.418915
ieu-b-85.vcf	ebi-a-GCST90001573	Terminally Differentiated CD4-CD8- T cell %CD4-CD8- T cell	0.00714808	0.501471
ieu-b-85.vcf	ebi-a-GCST90002069	CD4 on CD39+ secreting CD4 regulatory T cell	0.00726424	0.217209
ieu-b-85.vcf	ebi-a-GCST90001969	FSC-A on Natural Killer	0.00705124	0.806336
ieu-b-85.vcf	ebi-a-GCST90001669	CD28+ CD45RA- CD8dim T cell Absolute Count	0.00603508	0.911338
ieu-b-85.vcf	ebi-a-GCST90001498	Activated & resting CD4 regulatory T cell Absolute Count	0.00662832	0.456507
ieu-b-85.vcf	ebi-a-GCST90001778	CD25 on IgD+ CD24+ B cell	0.00641679	0.534415
ieu-b-85.vcf	ebi-a-GCST90001592	CD8+ T cell Absolute Count	0.00605816	0.939598
ieu-b-85.vcf	ebi-a-GCST90001952	CD33 on Monocytic Myeloid-Derived Suppressor Cells	0.0108548	0.288401
ieu-b-85.vcf	ebi-a-GCST90002002	PDL-1 on monocyte	0.00654174	0.891616
ieu-b-85.vcf	ebi-a-GCST90001404	Plasma Blast-Plasma Cell %B cell	0.00674929	0.352521
ieu-b-85.vcf	ebi-a-GCST90001392	IgD+ CD38+ B cell Absolute Count	0.00642172	0.835991
ieu-b-85.vcf	ebi-a-GCST90001872	HVEM on naive CD8+ T cell	0.0122038	0.647994
ieu-b-85.vcf	ebi-a-GCST90001929	CD127 on CD28+ CD45RA+ CD8+ T cell	0.00692002	0.451983
ieu-b-85.vcf	ebi-a-GCST90001461	Dendritic Cell Absolute Count	0.00663776	0.630597
ieu-b-85.vcf	ebi-a-GCST90001890	CD28 on CD45RA+ CD4+ T cell	0.00852793	0.910691
ieu-b-85.vcf	ebi-a-GCST90001507	CD25++ CD45RA+ CD4 not regulatory T cell Absolute Count	0.00711243	0.528749
ieu-b-85.vcf	ebi-a-GCST90001424	IgD+ B cell %Lymphocyte	0.00641938	0.536053
ieu-b-85.vcf	ebi-a-GCST90001554	Effector Memory CD8+ T cell Absolute Count	0.00674531	0.869268
ieu-b-85.vcf	ebi-a-GCST90001487	Activated CD4 regulatory T cell %CD4 regulatory T cell	0.00653292	0.437972
ieu-b-85.vcf	ebi-a-GCST90001477	HLA DR++ monocyte Absolute Count	0.00660206	0.730818
ieu-b-85.vcf	ebi-a-GCST90001528	CD33dim HLA DR+ CD11b- %CD33dim HLA DR+	0.00938344	0.376714
ieu-b-85.vcf	ebi-a-GCST90001770	CD24 on IgD- CD38dim B cell	0.0169891	0.678802
ieu-b-85.vcf	ebi-a-GCST90001788	CD25 on IgD- CD38+ B cell	0.00657913	0.929882
ieu-b-85.vcf	ebi-a-GCST90001569	Effector Memory CD4-CD8- T cell Absolute Count	0.00618347	0.135192
ieu-b-85.vcf	ebi-a-GCST90001876	HVEM on Central Memory CD4+ T cell	0.0119165	0.646319
ieu-b-85.vcf	ebi-a-GCST90001884	CD16-CD56 on Natural Killer	0.00744899	0.369217
ieu-b-85.vcf	ebi-a-GCST90002019	CD14 on Monocytic Myeloid-Derived Suppressor Cells	0.0110342	0.661869
ieu-b-85.vcf	ebi-a-GCST90002087	CD11c on myeloid Dendritic Cell	0.00774497	0.799764
ieu-b-85.vcf	ebi-a-GCST90001860	CD3 on CD39+ CD4+ T cell	0.00747997	0.600509
ieu-b-85.vcf	ebi-a-GCST90001474	Plasmacytoid Dendritic Cell %Dendritic Cell	0.0066416	0.934566
ieu-b-85.vcf	ebi-a-GCST90001602	Lymphocyte %leukocyte	0.00641864	0.516865
ieu-b-85.vcf	ebi-a-GCST90001578	Transitional B cell %lymphocyte	0.00629732	0.930295
ieu-b-85.vcf	ebi-a-GCST90002114	HLA DR on HLA DR+ CD4+ T cell	0.00717267	0.280223
ieu-b-85.vcf	ebi-a-GCST90001894	CD28 on CD28+ CD4+ T cell	0.00734372	0.934277
ieu-b-85.vcf	ebi-a-GCST90001549	Central Memory CD8+ T cell %CD8+ T cell	0.00650282	0.815676
ieu-b-85.vcf	ebi-a-GCST90001785	CD25 on IgD- CD24- B cell	0.00642549	0.997908
ieu-b-85.vcf	ebi-a-GCST90002062	CD4 on CD28+ CD4+ T cell	0.00711344	0.758376
ieu-b-85.vcf	ebi-a-GCST90001522	CD33- HLA DR- Absolute Count	0.0101061	0.894654
ieu-b-85.vcf	ebi-a-GCST90001736	CD19 on memory B cell	0.00668311	0.934941
ieu-b-85.vcf	ebi-a-GCST90001919	CD45 on Natural Killer T	0.00738691	0.295744
ieu-b-85.vcf	ebi-a-GCST90001585	CD14+ CD16+ monocyte %monocyte	0.00637571	0.5946
ieu-b-85.vcf	ebi-a-GCST90002021	CD14 on CD33dim HLA DR+ CD11b+	0.0109199	0.689415
ieu-b-85.vcf	ebi-a-GCST90001587	CD16+ monocyte %monocyte	0.0063006	0.834416
ieu-b-85.vcf	ebi-a-GCST90001955	CD33 on Immature Myeloid-Derived Suppressor Cells	0.0117961	0.305225
ieu-b-85.vcf	ebi-a-GCST90001938	CD25 on CD39+ resting CD4 regulatory T cell	0.00702527	0.627117
ieu-b-85.vcf	ebi-a-GCST90001561	CD45RA+ CD8+ T cell %CD8+ T cell	0.00565246	0.401795
ieu-b-85.vcf	ebi-a-GCST90001903	CD86 on myeloid Dendritic Cell	0.0074795	0.979656
ieu-b-85.vcf	ebi-a-GCST90002089	CD11c on monocyte	0.00812594	0.840199
ieu-b-85.vcf	ebi-a-GCST90001617	TCRgd T cell %lymphocyte	0.0067694	0.370849
ieu-b-85.vcf	ebi-a-GCST90001932	CD127 on CD45RA+ CD4+ T cell	0.00748471	0.564537
ieu-b-85.vcf	ebi-a-GCST90001464	CD86+ myeloid Dendritic Cell Absolute Count	0.00669651	0.790053
ieu-b-85.vcf	ebi-a-GCST90001402	Switched memory B cell %B cell	0.00652611	0.817573
ieu-b-85.vcf	ebi-a-GCST90001589	CD4+/CD8+ T cell	0.00605496	0.686328
ieu-b-85.vcf	ebi-a-GCST90001882	HVEM on Central Memory CD8+ T cell	0.0124509	0.927111
ieu-b-85.vcf	ebi-a-GCST90002036	CD80 on CD62L+ myeloid Dendritic Cell	0.0072845	0.620647
ieu-b-85.vcf	ebi-a-GCST90001667	CD28+ CD45RA- CD8dim T cell %T cell	0.00603749	0.905227
ieu-b-85.vcf	ebi-a-GCST90002020	CD14 on CD33+ HLA DR+ CD14dim	0.011287	0.481939
ieu-b-85.vcf	ebi-a-GCST90002104	HLA DR on myeloid Dendritic Cell	0.00714184	0.436913
ieu-b-85.vcf	ebi-a-GCST90001652	Granulocyte %leukocyte	0.00650561	0.727586
ieu-b-85.vcf	ebi-a-GCST90002088	CD11c on CD62L+ myeloid Dendritic Cell	0.00745905	0.653611
ieu-b-85.vcf	ebi-a-GCST90001892	CD28 on CD39+ CD4+ T cell	0.00716375	0.828408
ieu-b-85.vcf	ebi-a-GCST90001533	Basophil %CD33dim HLA DR- CD66b-	0.00910771	0.908771
ieu-b-85.vcf	ebi-a-GCST90001539	Central Memory CD4+ T cell %T cell	0.0072939	0.880355
ieu-b-85.vcf	ebi-a-GCST90001862	CD3 on CD28+ CD4-CD8- T cell	0.00748799	0.763942
ieu-b-85.vcf	ebi-a-GCST90001581	CD14- CD16- Absolute Count	0.0061529	0.341951
ieu-b-85.vcf	ebi-a-GCST90001749	CD20 on IgD+ CD38- naive B cell	0.00889984	0.695252
ieu-b-85.vcf	ebi-a-GCST90001822	IgD on IgD+ CD38- B cell	0.00669839	0.118
ieu-b-85.vcf	ebi-a-GCST90001449	CD11c+ monocyte %monocyte	0.00736399	0.517887
ieu-b-85.vcf	ebi-a-GCST90001695	CD45RA- CD28- CD8+ T cell Absolute Count	0.733816	0.418197
ieu-b-85.vcf	ebi-a-GCST90001950	CD33 on Granulocytic Myeloid-Derived Suppressor Cells	0.0124161	0.524039
ieu-b-85.vcf	ebi-a-GCST90001527	CD33dim HLA DR+ CD11b- Absolute Count	0.00981108	0.659143
ieu-b-85.vcf	ebi-a-GCST90001650	HLA DR+ Natural Killer %CD3- lymphocyte	0.00675078	0.342159
ieu-b-85.vcf	ebi-a-GCST90001571	Effector Memory CD4-CD8- T cell %T cell	0.00620889	0.293262
ieu-b-85.vcf	ebi-a-GCST90001717	BAFF-R on unswitched memory B cell	0.00659059	0.897711
ieu-b-85.vcf	ebi-a-GCST90001483	CD39+ resting CD4 regulatory T cell Absolute Count	0.00653904	0.282657
ieu-b-85.vcf	ebi-a-GCST90002017	CCR2 on monocyte	0.0073798	0.464823
ieu-b-85.vcf	ebi-a-GCST90002024	CD4 on naive CD4+ T cell	0.00730229	0.978261
ieu-b-85.vcf	ebi-a-GCST90001619	HLA DR+ T cell%T cell	0.0059408	0.773972
ieu-b-85.vcf	ebi-a-GCST90001495	CD39+ secreting CD4 regulatory T cell Absolute Count	0.0066814	0.998955
ieu-b-85.vcf	ebi-a-GCST90001817	CD38 on Plasma Blast-Plasma Cell	0.00621382	0.664349
ieu-b-85.vcf	ebi-a-GCST90001953	CD33 on CD33dim HLA DR-	0.0110679	0.441237
ieu-b-85.vcf	ebi-a-GCST90001579	CD14- CD16+ monocyte Absolute Count	0.00621449	0.915747
ieu-b-85.vcf	ebi-a-GCST90001447	IgD+ CD38+ B cell %B cell	0.00642292	0.669984
ieu-b-85.vcf	ebi-a-GCST90001709	BAFF-R on IgD+ CD38dim B cell	0.00664386	0.802067
ieu-b-85.vcf	ebi-a-GCST90002112	HLA DR on CD33- HLA DR+	0.0103363	0.704388
ieu-b-85.vcf	ebi-a-GCST90001730	CD19 on IgD+ CD38dim B cell	0.00637309	0.51829
ieu-b-85.vcf	ebi-a-GCST90002042	CD45 on CD33+ HLA DR+ CD14-	0.0112034	0.666671
ieu-b-85.vcf	ebi-a-GCST90002038	CD80 on CD62L+ plasmacytoid Dendritic Cell	0.00771138	0.579184
ieu-b-85.vcf	ebi-a-GCST90001746	CD20 on IgD+ CD24+ B cell	0.00649501	0.79642
ieu-b-85.vcf	ebi-a-GCST90001771	CD24 on memory B cell	0.00671375	0.556059
ieu-b-85.vcf	ebi-a-GCST90001806	CD27 on unswitched memory B cell	0.00648053	0.584857
ieu-b-85.vcf	ebi-a-GCST90002100	CD45RA on naive CD8+ T cell	0.00716096	0.364947
ieu-b-85.vcf	ebi-a-GCST90001768	CD24 on IgD+ CD38+ B cell	0.00650802	0.470314
ieu-b-85.vcf	ebi-a-GCST90001858	CD3 on CD45RA+ CD4+ T cell	0.00718713	0.178456
ieu-b-85.vcf	ebi-a-GCST90001555	Effector Memory CD8+ T cell %CD8+ T cell	0.00540193	0.675356
ieu-b-85.vcf	ebi-a-GCST90001716	BAFF-R on naive-mature B cell	0.0064987	0.787125
ieu-b-85.vcf	ebi-a-GCST90001411	IgD+ CD24+ B cell %B cell	0.00661307	0.910334
ieu-b-85.vcf	ebi-a-GCST90001646	Natural Killer %CD3- lymphocyte	0.00622355	0.858741
ieu-b-85.vcf	ebi-a-GCST90001542	Effector Memory CD4+ T cell Absolute Count	0.00645561	0.980765
ieu-b-85.vcf	ebi-a-GCST90002080	SSC-A on T cell	0.00682306	0.838517
ieu-b-85.vcf	ebi-a-GCST90001795	CD25 on transitional B cell	0.00665673	0.0745982
ieu-b-85.vcf	ebi-a-GCST90001744	CD20 on CD20- CD38- B cell	0.00650098	0.854416
ieu-b-85.vcf	ebi-a-GCST90001989	CD40 on CD14- CD16+ monocyte	0.00665019	0.719263
ieu-b-85.vcf	ebi-a-GCST90002037	CD80 on plasmacytoid Dendritic Cell	0.00777993	0.621674
ieu-b-85.vcf	ebi-a-GCST90001833	CD62L on CD62L+ Dendritic Cell	0.00723973	0.555291
ieu-b-85.vcf	ebi-a-GCST90001556	Effector Memory CD8+ T cell %T cell	0.00642449	0.711055
ieu-b-85.vcf	ebi-a-GCST90001546	Terminally Differentiated CD4+ T cell %CD4+ T cell	0.0064359	0.585479
ieu-b-85.vcf	ebi-a-GCST90001986	CD14 on CD14+ CD16- monocyte	0.006192	0.840033
ieu-b-85.vcf	ebi-a-GCST90001732	CD19 on IgD- CD27- B cell	0.00663859	0.618564
ieu-b-85.vcf	ebi-a-GCST90001821	IgD on IgD+ CD24- B cell	0.00672131	0.416944
ieu-b-85.vcf	ebi-a-GCST90001480	Resting CD4 regulatory T cell Absolute Count	0.00650445	0.704197
ieu-b-85.vcf	ebi-a-GCST90001563	Central Memory CD4-CD8- T cell Absolute Count	0.00559086	0.975246
ieu-b-85.vcf	ebi-a-GCST90001466	CD86+ plasmacytoid Dendritic Cell Absolute Count	0.00692347	0.905211
ieu-b-85.vcf	ebi-a-GCST90001664	CD28+ CD45RA+ CD8dim T cell %T cell	0.00612249	0.369007
ieu-b-85.vcf	ebi-a-GCST90001967	FSC-A on CD14+ monocyte	0.00711174	0.58376
ieu-b-85.vcf	ebi-a-GCST90001595	CD4+CD8+ T cell %T cell	0.0128865	0.963651
ieu-b-85.vcf	ebi-a-GCST90001891	CD28 on CD45RA- CD4 not regulatory T cell	0.00702893	0.677878
ieu-b-85.vcf	ebi-a-GCST90001826	IgD on unswitched memory B cell	0.00651167	0.747665
ieu-b-85.vcf	ebi-a-GCST90001880	HVEM on CD45RA- CD4+ T cell	0.0124194	0.747192
ieu-b-85.vcf	ebi-a-GCST90001867	CD3 on CD4+ T cell	0.00696205	0.512845
ieu-b-85.vcf	ebi-a-GCST90001644	B cell %lymphocyte	0.00661471	0.821442
ieu-b-85.vcf	ebi-a-GCST90002061	CD4 on CD39+ CD4+ T cell	0.00737166	0.447241
ieu-b-85.vcf	ebi-a-GCST90001911	CD45 on Natural Killer	0.00726163	0.600847
ieu-b-85.vcf	ebi-a-GCST90001864	CD3 on CD28+ CD45RA+ CD8+ T cell	0.0074484	0.255802
ieu-b-85.vcf	ebi-a-GCST90002029	CD39 on CD39+ CD8+ T cell	0.00740137	0.615458
ieu-b-85.vcf	ebi-a-GCST90002083	SSC-A on HLA DR+ T cell	0.00703406	0.211399
ieu-b-85.vcf	ebi-a-GCST90001834	CD62L on monocyte	0.00773591	0.865219
ieu-b-85.vcf	ebi-a-GCST90001446	IgD- CD38- B cell Absolute Count	0.00658371	0.621918
ieu-b-85.vcf	ebi-a-GCST90001623	Natural Killer T %lymphocyte	0.0065358	0.249706
ieu-b-85.vcf	ebi-a-GCST90001831	CD62L on CD62L+ myeloid Dendritic Cell	0.00682197	0.893833
ieu-b-85.vcf	ebi-a-GCST90002058	CD8 on CD8+ T cell	0.0075507	0.827382
ieu-b-85.vcf	ebi-a-GCST90001784	CD25 on IgD+ CD38dim B cell	0.00662356	0.541533
ieu-b-85.vcf	ebi-a-GCST90001633	CD8dim Natural Killer T Absolute Count	0.00650936	0.737682
ieu-b-85.vcf	ebi-a-GCST90001671	CD39+ CD8+ T cell %CD8+ T cell	0.0065785	0.71194
ieu-b-85.vcf	ebi-a-GCST90001762	CD20 on IgD+ B cell	0.0064878	0.970477
ieu-b-85.vcf	ebi-a-GCST90002026	CD4 on Terminally Differentiated CD4+ T cell	0.00745553	0.894387
ieu-b-85.vcf	ebi-a-GCST90002054	CD8 on Central Memory CD8+ T cell	0.00754878	0.973636
ieu-b-85.vcf	ebi-a-GCST90001934	CD25 on CD45RA+ CD4 not regulatory T cell	0.00635685	0.649325
ieu-b-85.vcf	ebi-a-GCST90001763	CD20 on transitional B cell	0.00660314	0.883494
ieu-b-85.vcf	ebi-a-GCST90001668	CD28+ CD45RA- CD8dim T cell %CD8dim T cell	0.00642546	0.443058
ieu-b-85.vcf	ebi-a-GCST90001874	HVEM on Terminally Differentiated CD8+ T cell	0.0122093	0.326056
ieu-b-85.vcf	ebi-a-GCST90001921	CD45 on HLA DR+ CD8+ T cell	0.00672841	0.84237
ieu-b-85.vcf	ebi-a-GCST90001865	CD3 on CD28- CD8+ T cell	0.00732633	0.902629
ieu-b-85.vcf	ebi-a-GCST90002015	CCR2 on plasmacytoid Dendritic Cell	0.00748775	0.329609
ieu-b-85.vcf	ebi-a-GCST90001458	Myeloid Dendritic Cell Absolute Count	0.00661634	0.416532
ieu-b-85.vcf	ebi-a-GCST90001896	CD28 on CD28+ CD45RA+ CD8+ T cell	0.00714109	0.510296
ieu-b-85.vcf	ebi-a-GCST90001684	CD127- CD8+ T cell Absolute Count	0.00723311	0.429907
ieu-b-85.vcf	ebi-a-GCST90001599	CD4-CD8- T cell %T cell	0.00625229	0.278287
ieu-b-85.vcf	ebi-a-GCST90001866	CD3 on CD39+ CD8+ T cell	0.00738012	0.534491
ieu-b-85.vcf	ebi-a-GCST90001596	CD8dim T cell Absolute Count	0.00614929	0.308781
ieu-b-85.vcf	ebi-a-GCST90001871	HVEM on T cell	0.0135647	0.748156
ieu-b-85.vcf	ebi-a-GCST90002025	CD4 on Effector Memory CD4+ T cell	0.00751286	0.943293
ieu-b-85.vcf	ebi-a-GCST90002121	CD8 on CD39+ CD8+ T cell	0.00699362	0.962937
ieu-b-85.vcf	ebi-a-GCST90001491	CD39+ activated CD4 regulatory T cell %CD4 regulatory T cell	0.00626791	0.813862
ieu-b-85.vcf	ebi-a-GCST90001535	CD45RA- CD4+ T cell %CD4+ T cell	0.00625224	0.97649
ieu-b-85.vcf	ebi-a-GCST90001818	CD38 on IgD+ B cell	0.0068835	0.459937
ieu-b-85.vcf	ebi-a-GCST90001917	CD45 on CD8+ T cell	0.00641911	0.76035
ieu-b-85.vcf	ebi-a-GCST90001959	CD4 on HLA DR+ CD4+ T cell	0.00718908	0.583542
ieu-b-85.vcf	ebi-a-GCST90002085	SSC-A on HLA DR+ CD4+ T cell	0.00672716	0.863388
ieu-b-85.vcf	ebi-a-GCST90001983	CD14 on CD14+ CD16+ monocyte	0.00655224	0.61712
ieu-b-85.vcf	ebi-a-GCST90001635	CD8dim Natural Killer T %lymphocyte	0.0066769	0.585226
ieu-b-85.vcf	ebi-a-GCST90001861	CD3 on CD28+ CD4+ T cell	0.00695014	0.530697
ieu-b-85.vcf	ebi-a-GCST90001783	CD25 on IgD+ CD38+ B cell	0.00664609	0.358666
ieu-b-85.vcf	ebi-a-GCST90001503	Activated & secreting CD4 regulatory T cell %CD4+ T cell	0.00619764	0.422944
ieu-b-85.vcf	ebi-a-GCST90001551	Naive CD8+ T cell Absolute Count	0.00449313	0.10518
ieu-b-85.vcf	ebi-a-GCST90001759	CD20 on naive-mature B cell	0.00653027	0.805509
ieu-b-85.vcf	ebi-a-GCST90001482	Resting CD4 regulatory T cell %CD4+ T cell	0.00626298	0.727069
ieu-b-85.vcf	ebi-a-GCST90002075	SSC-A on B cell	0.00698765	0.194385
ieu-b-85.vcf	ebi-a-GCST90001873	HVEM on Effector Memory CD8+ T cell	0.012623	0.827921
ieu-b-85.vcf	ebi-a-GCST90002055	CD8 on naive CD8+ T cell	0.00745425	0.909024
ieu-b-85.vcf	ebi-a-GCST90001997	CX3CR1 on CD14+ CD16- monocyte	0.00669023	0.291531
ieu-b-85.vcf	ebi-a-GCST90002109	HLA DR on CD33+ HLA DR+ CD14dim	0.0101632	0.865892
ieu-b-85.vcf	ebi-a-GCST90001915	CD45 on T cell	0.00681054	0.507455
ieu-b-85.vcf	ebi-a-GCST90001524	Granulocytic Myeloid-Derived Suppressor Cells Absolute Count	0.00891155	0.68967
ieu-b-85.vcf	ebi-a-GCST90001931	CD127 on CD4+ T cell	0.0156886	0.901461
ieu-b-85.vcf	ebi-a-GCST90001930	CD127 on CD28- CD8+ T cell	0.00782638	0.104376
ieu-b-85.vcf	ebi-a-GCST90001755	CD20 on IgD- CD38- B cell	0.00650809	0.9747
ieu-b-85.vcf	ebi-a-GCST90002116	HLA DR on B cell	0.00713678	0.653334
ieu-b-85.vcf	ebi-a-GCST90001512	CD25++ CD45RA- CD4 not regulatory T cell %T cell	0.00663851	0.93587
ieu-b-85.vcf	ebi-a-GCST90001605	T cell %leukocyte	0.00625684	0.448632
ieu-b-85.vcf	ebi-a-GCST90002103	CD45RA on CD39+ resting CD4 regulatory T cell	0.0171384	0.871104
ieu-b-85.vcf	ebi-a-GCST90001613	CD4-CD8- T cell %leukocyte	0.00616871	0.583199
ieu-b-85.vcf	ebi-a-GCST90001636	CD4-CD8- Natural Killer T Absolute Count	0.0140559	0.59544
ieu-b-85.vcf	ebi-a-GCST90001936	CD25 on CD4 regulatory T cell	0.00680476	0.27373
ieu-b-85.vcf	ebi-a-GCST90001543	Effector Memory CD4+ T cell %CD4+ T cell	0.00630419	0.981571
ieu-b-85.vcf	ebi-a-GCST90001840	CD3 on Terminally Differentiated CD8+ T cell	0.00707645	0.684821
ieu-b-85.vcf	ebi-a-GCST90001640	CD3- lymphocyte %lymphocyte	0.00894826	0.2777
ieu-b-85.vcf	ebi-a-GCST90001789	CD25 on IgD- CD38dim B cell	0.006445	0.926511
ieu-b-85.vcf	ebi-a-GCST90001928	CD127 on CD28+ CD45RA- CD8+ T cell	0.00717384	0.247108
ieu-b-85.vcf	ebi-a-GCST90001753	CD20 on IgD- CD24- B cell	0.00633661	0.82499
ieu-b-85.vcf	ebi-a-GCST90001844	CD3 on Terminally Differentiated CD4+ T cell	0.00724446	0.197426
ieu-b-85.vcf	ebi-a-GCST90001839	CD3 on Effector Memory CD8+ T cell	0.00740569	0.669666
ieu-b-85.vcf	ebi-a-GCST90001676	CD28- CD25++ CD8+ T cell %T cell	0.0150766	0.554628
ieu-b-85.vcf	ebi-a-GCST90001643	B cell %CD3- lymphocyte	0.00611197	0.617007
ieu-b-85.vcf	ebi-a-GCST90001974	FSC-A on CD8+ T cell	0.00619146	0.697889
ieu-b-85.vcf	ebi-a-GCST90001981	CD40 on CD14+ CD16+ monocyte	0.00636466	0.786113
ieu-b-85.vcf	ebi-a-GCST90001485	CD39+ resting CD4 regulatory T cell %CD4 regulatory T cell	0.006255	0.455754
ieu-b-85.vcf	ebi-a-GCST90001628	HLA DR+ CD8+ T cell %T cell	0.00591666	0.440952
ieu-b-85.vcf	ebi-a-GCST90001661	CD28- CD8dim T cell %T cell	0.00672402	0.311784
ieu-b-85.vcf	ebi-a-GCST90001850	CD3 on HLA DR+ CD8+ T cell	0.00699139	0.760992
ieu-b-85.vcf	ebi-a-GCST90002043	CD45 on CD33+ HLA DR+ CD14dim	0.011248	0.671035
ieu-b-85.vcf	ebi-a-GCST90001490	CD39+ activated CD4 regulatory T cell %activated CD4 regulatory T cell	0.0120398	0.885038
ieu-b-85.vcf	ebi-a-GCST90001584	CD14- CD16+ monocyte %monocyte	0.00620858	0.917404
ieu-b-85.vcf	ebi-a-GCST90001991	HLA DR on CD14+ monocyte	0.00654349	0.44824
ieu-b-85.vcf	ebi-a-GCST90001793	CD25 on switched memory B cell	0.00654713	0.709237
ieu-b-85.vcf	ebi-a-GCST90001444	CD20- CD38- B cell %lymphocyte	0.00665533	0.501156
ieu-b-85.vcf	ebi-a-GCST90001734	CD19 on IgD- CD38+ B cell	0.00659361	0.867739
ieu-b-85.vcf	ebi-a-GCST90001462	CD62L- Dendritic Cell Absolute Count	0.00640182	0.629741
ieu-b-85.vcf	ebi-a-GCST90001690	CD28+ CD45RA+ CD8+ T cell Absolute Count	0.00459593	0.155911
ieu-b-85.vcf	ebi-a-GCST90001794	CD25 on IgD+ B cell	0.00681688	0.443839
ieu-b-85.vcf	ebi-a-GCST90001747	CD20 on IgD+ CD24- B cell	0.00635719	0.758148
ieu-b-85.vcf	ebi-a-GCST90001606	CD4+ T cell %leukocyte	0.00609654	0.668604
ieu-b-85.vcf	ebi-a-GCST90001521	CD33+ HLA DR+ CD14dim %CD33+ HLA DR+	0.00999608	0.784634
ieu-b-85.vcf	ebi-a-GCST90002118	CD8 on CD28+ CD45RA- CD8+ T cell	0.00742941	0.62749
ieu-b-85.vcf	ebi-a-GCST90001893	CD28 on CD28+ CD45RA- CD8+ T cell	0.0069739	0.970386
ieu-b-85.vcf	ebi-a-GCST90001657	CD28+ CD4-CD8- T cell Absolute Count	0.00596804	0.43253
ieu-b-85.vcf	ebi-a-GCST90001689	CD28+ CD45RA+ CD8+ T cell %CD8+ T cell	0.00497135	0.99675
ieu-b-85.vcf	ebi-a-GCST90002102	CD45RA on resting CD4 regulatory T cell	0.00688818	0.572152
ieu-b-85.vcf	ebi-a-GCST90001627	HLA DR+ CD8+ T cell Absolute Count	0.00620779	0.189832
ieu-b-85.vcf	ebi-a-GCST90001895	CD28 on CD28+ CD4-CD8- T cell	0.0604988	0.549157
ieu-b-85.vcf	ebi-a-GCST90001666	CD28+ CD45RA+ CD8dim T cell Absolute Count	0.00580712	0.801296
ieu-b-85.vcf	ebi-a-GCST90002004	CCR2 on CD14+ CD16- monocyte	0.00639283	0.795157
ieu-b-85.vcf	ebi-a-GCST90001711	BAFF-R on IgD- CD27- B cell	0.00646885	0.684445
ieu-b-85.vcf	ebi-a-GCST90001824	IgD on IgD+ CD38+ B cell	0.00653801	0.397668
ieu-b-85.vcf	ebi-a-GCST90001898	CD28 on CD4+ T cell	0.00724467	0.583237
ieu-b-85.vcf	ebi-a-GCST90001516	Immature Myeloid-Derived Suppressor Cells %CD33dim HLA DR- CD66b-	0.0093194	0.278614
ieu-b-85.vcf	ebi-a-GCST90001552	Naive CD8+ T cell %CD8+ T cell	0.00459742	0.766443
ieu-b-85.vcf	ebi-a-GCST90001978	FSC-A on HLA DR+ CD8+ T cell	0.00732721	0.873165
ieu-b-85.vcf	ebi-a-GCST90001675	CD28- CD127- CD25++ CD8+ T cell Absolute Count	0.00689985	0.454517
ieu-b-85.vcf	ebi-a-GCST90001637	CD4-CD8- Natural Killer T %T cell	0.00630749	0.457413
ieu-b-85.vcf	ebi-a-GCST90001904	CD86 on CD62L+ myeloid Dendritic Cell	0.00704807	0.744496
ieu-b-85.vcf	ebi-a-GCST90001885	CD16-CD56 on HLA DR+ Natural Killer	0.00695896	0.768095
ieu-b-85.vcf	ebi-a-GCST90001426	IgD- CD38dim B cell %lymphocyte	0.00647417	0.569578
ieu-b-85.vcf	ebi-a-GCST90001576	Transitional B cell %B cell	0.0064421	0.863876
ieu-b-85.vcf	ebi-a-GCST90002022	CD4 on CD4+ T cell	0.00742566	0.759034
ieu-b-85.vcf	ebi-a-GCST90001700	CD45RA+ CD28- CD8+ T cell %T cell	0.0394639	0.18023
ieu-b-85.vcf	ebi-a-GCST90001713	BAFF-R on IgD- CD38+ B cell	0.00616718	0.898187
ieu-b-85.vcf	ebi-a-GCST90001450	CD62L- monocyte Absolute Count	0.0072694	0.283483
ieu-b-85.vcf	ebi-a-GCST90001418	CD24+ CD27+ B cell Absolute Count	0.00654413	0.894576
ieu-b-85.vcf	ebi-a-GCST90001992	CCR2 on CD14+ CD16+ monocyte	0.0064817	0.411019
ieu-b-85.vcf	ebi-a-GCST90001777	CD25 on CD24+ CD27+ B cell	0.00666	0.459945
ieu-b-85.vcf	ebi-a-GCST90002090	CD11c on granulocyte	0.00780245	0.346594
ieu-b-85.vcf	ebi-a-GCST90001879	HVEM on Terminally Differentiated CD4+ T cell	0.0120873	0.909639
ieu-b-85.vcf	ebi-a-GCST90001423	CD20- CD38- B cell Absolute Count	0.00650187	0.612679
ieu-b-85.vcf	ebi-a-GCST90001510	CD25++ CD45RA- CD4 not regulatory T cell Absolute Count	0.00670717	0.536372
ieu-b-85.vcf	ebi-a-GCST90001559	Terminally Differentiated CD8+ T cell %T cell	0.00657103	0.345767
ieu-b-85.vcf	ebi-a-GCST90001906	CD86 on granulocyte	0.00803348	0.690359
ieu-b-85.vcf	ebi-a-GCST90001901	CD28 on CD39+ resting CD4 regulatory T cell	0.00717782	0.142271
ieu-b-85.vcf	ebi-a-GCST90002000	PDL-1 on CD14- CD16-	0.00630342	0.758436
ieu-b-85.vcf	ebi-a-GCST90002059	CD8 on Natural Killer T	0.00691038	0.40576
ieu-b-85.vcf	ebi-a-GCST90001855	CD3 on secreting CD4 regulatory T cell	0.00741936	0.35701
ieu-b-85.vcf	ebi-a-GCST90001415	IgD+ CD24- B cell %B cell	0.00667872	0.509059
ieu-b-85.vcf	ebi-a-GCST90001593	CD8+ T cell %T cell	0.00608777	0.794775
ieu-b-85.vcf	ebi-a-GCST90001612	CD8dim T cell %leukocyte	0.00654362	0.965953
ieu-b-85.vcf	ebi-a-GCST90001699	CD45RA+ CD28- CD8+ T cell %CD8+ T cell	0.0921126	0.0812804
ieu-b-85.vcf	ebi-a-GCST90001799	CD27 on T cell	0.00904814	0.730153
ieu-b-85.vcf	ebi-a-GCST90002001	CD64 on CD14- CD16-	0.0063345	0.211823
ieu-b-85.vcf	ebi-a-GCST90001396	IgD+ CD38- B cell Absolute Count	0.00659786	0.812767
ieu-b-85.vcf	ebi-a-GCST90001574	Terminally Differentiated CD4-CD8- T cell %T cell	0.00686852	0.876638
ieu-b-85.vcf	ebi-a-GCST90001497	CD39+ secreting CD4 regulatory T cell %CD4 regulatory T cell	0.00654462	0.343507
ieu-b-85.vcf	ebi-a-GCST90001802	CD27 on IgD- CD38- B cell	0.00643352	0.597657
ieu-b-85.vcf	ebi-a-GCST90002076	SSC-A on Natural Killer	0.00705519	0.574895
ieu-b-85.vcf	ebi-a-GCST90001653	CD28- CD4-CD8- T cell %CD4-CD8- T cell	0.0070376	0.0423745
ieu-b-85.vcf	ebi-a-GCST90001775	CD25 on B cell	0.00694581	0.463281
ieu-b-85.vcf	ebi-a-GCST90001797	CD27 on CD20- CD38- B cell	0.00629688	0.685135
ieu-b-85.vcf	ebi-a-GCST90001767	CD24 on IgD+ CD38- unswitched memory B cell	0.0100901	0.61658
ieu-b-85.vcf	ebi-a-GCST90001964	FSC-A on plasmacytoid Dendritic Cell	0.00762536	0.849133
ieu-b-85.vcf	ebi-a-GCST90001456	CD11c+ HLA DR++ monocyte Absolute Count	0.00739943	0.781418
ieu-b-85.vcf	ebi-a-GCST90001962	CD25 on CD28+ CD4+ T cell	0.0146818	0.444408
ieu-b-85.vcf	ebi-a-GCST90001832	CD62L on CD62L+ plasmacytoid Dendritic Cell	0.00733372	0.528617
ieu-b-85.vcf	ebi-a-GCST90001719	BAFF-R on IgD+ B cell	0.0064759	0.890474
ieu-b-85.vcf	ebi-a-GCST90001994	CX3CR1 on CD14- CD16-	0.00632644	0.62588
ieu-b-85.vcf	ebi-a-GCST90001995	CX3CR1 on monocyte	0.00670513	0.162553
ieu-b-85.vcf	ebi-a-GCST90001905	CD86 on monocyte	0.00753698	0.387283
ieu-b-85.vcf	ebi-a-GCST90001702	BAFF-R on CD24+ CD27+ B cell	0.0068351	0.744016
ieu-b-85.vcf	ebi-a-GCST90001471	CD62L- plasmacytoid Dendritic Cell %Dendritic Cell	0.00654422	0.634798
ieu-b-85.vcf	ebi-a-GCST90002050	CD45 on CD33dim HLA DR-	0.0111688	0.241398
ieu-b-85.vcf	ebi-a-GCST90001718	BAFF-R on switched memory B cell	0.00681633	0.427214
ieu-b-85.vcf	ebi-a-GCST90001632	CD8+ Natural Killer T %lymphocyte	0.00643491	0.222643
ieu-b-85.vcf	ebi-a-GCST90001564	Central Memory CD4-CD8- T cell %CD4-CD8- T cell	0.00584352	0.494232
ieu-b-85.vcf	ebi-a-GCST90001400	IgD+ B cell Absolute Count	0.00648131	0.861909
ieu-b-85.vcf	ebi-a-GCST90001999	PDL-1 on CD14- CD16+ monocyte	0.00645456	0.649058
ieu-b-85.vcf	ebi-a-GCST90001776	CD25 on CD20- CD38- B cell	0.00639803	0.92481
ieu-b-85.vcf	ebi-a-GCST90001740	CD19 on switched memory B cell	0.0065907	0.426457
ieu-b-85.vcf	ebi-a-GCST90001947	CD33 on CD33+ HLA DR+ CD14dim	0.0110701	0.204292
ieu-b-85.vcf	ebi-a-GCST90001909	CD45 on CD14+ monocyte	0.00741469	0.656169
ieu-b-85.vcf	ebi-a-GCST90001473	CD62L- CD86+ myeloid Dendritic Cell %Dendritic Cell	0.00673737	0.377095
ieu-b-85.vcf	ebi-a-GCST90002045	CD45 on CD33- HLA DR-	0.0100744	0.92567
ieu-b-85.vcf	ebi-a-GCST90002046	CD45 on CD33- HLA DR+	0.0109704	0.331764
ieu-b-85.vcf	ebi-a-GCST90002068	CD4 on secreting CD4 regulatory T cell	0.00723604	0.501536
ieu-b-85.vcf	ebi-a-GCST90001514	Hematopoietic Stem Cell Absolute Count	0.00884243	0.660955
ieu-b-85.vcf	ebi-a-GCST90002065	CD4 on CD39+ resting CD4 regulatory T cell	0.00756855	0.861781
ieu-b-85.vcf	ebi-a-GCST90002101	CD45RA on Terminally Differentiated CD8+ T cell	0.0070213	0.811421
ieu-b-85.vcf	ebi-a-GCST90001779	CD25 on IgD+ CD24- B cell	0.00658119	0.894402
ieu-b-85.vcf	ebi-a-GCST90002072	SSC-A on plasmacytoid Dendritic Cell	0.00732042	0.766743
ieu-b-85.vcf	ebi-a-GCST90001511	CD25++ CD45RA- CD4 not regulatory T cell %CD4+ T cell	0.00672413	0.775742
ieu-b-85.vcf	ebi-a-GCST90001970	FSC-A on HLA DR+ Natural Killer	0.00690799	0.366981
ieu-b-85.vcf	ebi-a-GCST90001568	Naive CD4-CD8- T cell %T cell	0.00535284	0.90131
ieu-b-85.vcf	ebi-a-GCST90001642	B cell Absolute Count	0.00658443	0.336016
ieu-b-85.vcf	ebi-a-GCST90001837	CD66b on Granulocytic Myeloid-Derived Suppressor Cells	0.0126606	0.817439
ieu-b-85.vcf	ebi-a-GCST90001827	IgD on IgD+ B cell	0.00688308	0.218777
ieu-b-85.vcf	ebi-a-GCST90001769	CD24 on IgD- CD38- B cell	0.00665903	0.233715
ieu-b-85.vcf	ebi-a-GCST90002018	CCR2 on granulocyte	0.00738014	0.341182
ieu-b-85.vcf	ebi-a-GCST90001603	T cell Absolute Count	0.00610729	0.245018
ieu-b-85.vcf	ebi-a-GCST90001677	CD28- CD25++ CD8+ T cell %CD8+ T cell	0.00661891	0.498167
ieu-b-85.vcf	ebi-a-GCST90002011	CD64 on CD14+ CD16+ monocyte	0.00659273	0.653365
ieu-b-85.vcf	ebi-a-GCST90001430	IgD+ CD38dim B cell %lymphocyte	0.00620768	0.500958
ieu-b-85.vcf	ebi-a-GCST90001541	Naive CD4+ T cell %CD4+ T cell	0.0060548	0.695794
ieu-b-85.vcf	ebi-a-GCST90001735	CD19 on IgD- CD38dim B cell	0.00643331	0.839213
ieu-b-85.vcf	ebi-a-GCST90001624	HLA DR+ CD4+ T cell Absolute Count	0.0066054	0.319979
ieu-b-85.vcf	ebi-a-GCST90001641	CD3- lymphocyte %leukocyte	0.00674007	0.435316
ieu-b-85.vcf	ebi-a-GCST90002077	SSC-A on HLA DR+ Natural Killer	0.00678154	0.983766
ieu-b-85.vcf	ebi-a-GCST90001937	CD25 on resting CD4 regulatory T cell	0.00671009	0.292085
ieu-b-85.vcf	ebi-a-GCST90002039	CD80 on monocyte	0.00729506	0.851125
ieu-b-85.vcf	ebi-a-GCST90001941	CD25 on secreting CD4 regulatory T cell	0.00699058	0.922048
ieu-b-85.vcf	ebi-a-GCST90001562	CD45RA+ CD8+ T cell %T cell	0.00564392	0.40419
ieu-b-85.vcf	ebi-a-GCST90001845	CD3 on CD45RA- CD4+ T cell	0.00740325	0.733507
ieu-b-85.vcf	ebi-a-GCST90001910	CD45 on B cell	0.00691205	0.114939
ieu-b-85.vcf	ebi-a-GCST90001830	BAFF-R on CD20- B cell	0.00639764	0.621452
ieu-b-85.vcf	ebi-a-GCST90001774	CD24 on transitional B cell	0.0065259	0.615348
ieu-b-85.vcf	ebi-a-GCST90001452	CD11c+ CD62L- monocyte Absolute Count	0.00696695	0.402097
ieu-b-85.vcf	ebi-a-GCST90001410	IgD- CD38+ B cell %B cell	0.00662193	0.967913
ieu-b-85.vcf	ebi-a-GCST90002111	HLA DR on CD33dim HLA DR+ CD11b-	0.0101811	0.482875
ieu-b-85.vcf	ebi-a-GCST90001416	IgD+ CD24- B cell Absolute Count	0.00676382	0.824441
ieu-b-85.vcf	ebi-a-GCST90001760	CD20 on unswitched memory B cell	0.00655763	0.574743
ieu-b-85.vcf	ebi-a-GCST90001810	CD38 on CD3- CD19-	0.00965472	0.696171
ieu-b-85.vcf	ebi-a-GCST90001499	Activated & resting CD4 regulatory T cell %CD4 regulatory T cell	0.00636743	0.894262
ieu-b-85.vcf	ebi-a-GCST90002034	CD39 on monocyte	0.0082615	0.798364
ieu-b-85.vcf	ebi-a-GCST90001820	IgD on IgD+ CD24+ B cell	0.00653516	0.304802
ieu-b-85.vcf	ebi-a-GCST90001441	IgD+ CD24- B cell %lymphocyte	0.00647978	0.450826
ieu-b-85.vcf	ebi-a-GCST90001808	CD27 on switched memory B cell	0.00648104	0.456024
ieu-b-85.vcf	ebi-a-GCST90001951	CD33 on CD66b++ myeloid cell	0.0112402	0.836784
ieu-b-85.vcf	ebi-a-GCST90001654	CD28- CD4-CD8- T cell Absolute Count	0.00677803	0.206809
ieu-b-85.vcf	ebi-a-GCST90002082	SSC-A on CD8+ T cell	0.005935	0.604001
ieu-b-85.vcf	ebi-a-GCST90001764	CD24 on CD24+ CD27+ B cell	0.0153388	0.994991
ieu-b-85.vcf	ebi-a-GCST90002074	SSC-A on CD14+ monocyte	0.00736464	0.953696
ieu-b-85.vcf	ebi-a-GCST90001537	Central Memory CD4+ T cell Absolute Count	0.00658768	0.290004
ieu-b-85.vcf	ebi-a-GCST90001815	CD38 on IgD- CD38dim B cell	0.00627613	0.721191
ieu-b-85.vcf	ebi-a-GCST90001680	CD25++ CD8+ T cell %CD8+ T cell	0.00678326	0.486399
ieu-b-85.vcf	ebi-a-GCST90001486	Activated CD4 regulatory T cell Absolute Count	0.00659325	0.47757
ieu-b-85.vcf	ebi-a-GCST90001629	HLA DR+ CD8+ T cell %lymphocyte	0.00607592	0.311838
ieu-b-85.vcf	ebi-a-GCST90002032	CD39 on CD39+ CD4+ T cell	0.00741033	0.791622
ieu-b-85.vcf	ebi-a-GCST90001786	CD25 on IgD- CD27- B cell	0.00651272	0.875115
ieu-b-85.vcf	ebi-a-GCST90001493	Secreting CD4 regulatory T cell %CD4 regulatory T cell	0.00637317	0.813305
ieu-b-85.vcf	ebi-a-GCST90001790	CD25 on memory B cell	0.00664546	0.840559
ieu-b-85.vcf	ebi-a-GCST90001838	CD3 on naive CD8+ T cell	0.00758903	0.705461
ieu-b-85.vcf	ebi-a-GCST90002051	CD45 on basophil	0.0114202	0.632284
ieu-b-85.vcf	ebi-a-GCST90001638	CD4-CD8- Natural Killer T %lymphocyte	0.0064206	0.518037
ieu-b-85.vcf	ebi-a-GCST90002014	CCR2 on CD62L+ myeloid Dendritic Cell	0.00728466	0.470849
ieu-b-85.vcf	ebi-a-GCST90001575	Naive CD4+ T cell %T cell	0.00634914	0.464359
ieu-b-85.vcf	ebi-a-GCST90001948	CD33 on CD33dim HLA DR+ CD11b+	0.0110575	0.171342
ieu-b-85.vcf	ebi-a-GCST90001811	CD38 on IgD+ CD24- B cell	0.00700175	0.657518
ieu-b-85.vcf	ebi-a-GCST90001819	CD38 on transitional B cell	0.00653696	0.289584
ieu-b-85.vcf	ebi-a-GCST90001960	CD25 on CD4+ T cell	0.00707944	0.996989
ieu-b-85.vcf	ebi-a-GCST90001886	CD28 on CD39+ activated CD4 regulatory T cell	0.00683758	0.863826
ieu-b-85.vcf	ebi-a-GCST90001620	HLA DR+ T cell%lymphocyte	0.00602252	0.902082
ieu-b-85.vcf	ebi-a-GCST90001502	Activated & secreting CD4 regulatory T cell %CD4 regulatory T cell	0.00604043	0.762274
ieu-b-85.vcf	ebi-a-GCST90001435	Plasma Blast-Plasma Cell %lymphocyte	0.0065139	0.348198
ieu-b-85.vcf	ebi-a-GCST90001812	CD38 on IgD+ CD38+ B cell	0.00672571	0.998479
ieu-b-85.vcf	ebi-a-GCST90001438	IgD- CD38dim B cell Absolute Count	0.00627357	0.223365
ieu-b-85.vcf	ebi-a-GCST90002053	CD45 on CD33+ HLA DR+	0.0109448	0.882122
ieu-b-85.vcf	ebi-a-GCST90002066	CD4 on activated CD4 regulatory T cell	0.00700218	0.518525
ieu-b-85.vcf	ebi-a-GCST90001413	IgD- CD24- B cell %B cell	0.00640682	0.493726
ieu-b-85.vcf	ebi-a-GCST90001509	CD25++ CD45RA+ CD4 not regulatory T cell %T cell	0.00665289	0.427483
ieu-b-85.vcf	ebi-a-GCST90001996	CX3CR1 on CD14+ CD16+ monocyte	0.00648427	0.962229
ieu-b-85.vcf	ebi-a-GCST90001660	CD39+ CD4+ T cell Absolute Count	0.00660516	0.732552
ieu-b-85.vcf	ebi-a-GCST90001460	Plasmacytoid Dendritic Cell Absolute Count	0.00641449	0.573953
ieu-b-85.vcf	ebi-a-GCST90001870	CD34 on Hematopoietic Stem Cell	0.0109065	0.481624
ieu-b-85.vcf	ebi-a-GCST90001761	CD20 on switched memory B cell	0.00657096	0.894386
ieu-b-85.vcf	ebi-a-GCST90001780	CD25 on IgD+ CD38- B cell	0.00674361	0.452827
ieu-b-85.vcf	ebi-a-GCST90001731	CD19 on IgD- CD24- B cell	0.00668077	0.775105
ieu-b-85.vcf	ebi-a-GCST90001494	Secreting CD4 regulatory T cell %CD4+ T cell	0.00749281	0.123854
ieu-b-85.vcf	ebi-a-GCST90002035	CD80 on myeloid Dendritic Cell	0.00742651	0.939986
ieu-b-85.vcf	ebi-a-GCST90001621	Natural Killer T Absolute Count	0.00636733	0.0948438
ieu-b-85.vcf	ebi-a-GCST90002095	CD11b on CD33dim HLA DR-	0.0108402	0.177276
ieu-b-85.vcf	ebi-a-GCST90001782	CD25 on IgD+ CD38- unswitched memory B cell	0.00986765	0.79863
ieu-b-85.vcf	ebi-a-GCST90001425	IgD- CD38+ B cell %lymphocyte	0.00647518	0.651484
ieu-b-85.vcf	ebi-a-GCST90001715	BAFF-R on memory B cell	0.00679206	0.517885
ieu-b-85.vcf	ebi-a-GCST90002031	CD39 on CD39+ secreting CD4 regulatory T cell	0.0073076	0.915706
ieu-b-85.vcf	ebi-a-GCST90001701	BAFF-R on CD20- CD38- B cell	0.00653386	0.951303
ieu-b-85.vcf	ebi-a-GCST90001405	Plasma Blast-Plasma Cell Absolute Count	0.0066221	0.645253
ieu-b-85.vcf	ebi-a-GCST90002105	HLA DR on plasmacytoid Dendritic Cell	0.00720198	0.670993
ieu-b-85.vcf	ebi-a-GCST90001800	CD27 on IgD+ CD24+ B cell	0.00671808	0.956685
ieu-b-85.vcf	ebi-a-GCST90001725	CD19 on IgD+ CD24- B cell	0.00640208	0.455037
ieu-b-85.vcf	ebi-a-GCST90001703	BAFF-R on IgD+ CD24+ B cell	0.00683677	0.942711
ieu-b-85.vcf	ebi-a-GCST90001459	Myeloid Dendritic Cell %Dendritic Cell	0.00669784	0.888323
ieu-b-85.vcf	ebi-a-GCST90001742	CD19 on transitional B cell	0.0064848	0.797166
ieu-b-85.vcf	ebi-a-GCST90001645	Natural Killer Absolute Count	0.0063031	0.482281
ieu-b-85.vcf	ebi-a-GCST90001409	Naive-mature B cell Absolute Count	0.00691556	0.759406
ieu-b-85.vcf	ebi-a-GCST90001949	CD33 on CD33dim HLA DR+ CD11b-	0.0105901	0.255586
ieu-b-85.vcf	ebi-a-GCST90001607	CD8+ T cell %leukocyte	0.00602122	0.730125
ieu-b-85.vcf	ebi-a-GCST90001429	IgD+ CD38+ B cell %lymphocyte	0.00639822	0.82547
ieu-b-85.vcf	ebi-a-GCST90001565	Central Memory CD4-CD8- T cell %T cell	0.00579554	0.834012
ieu-b-85.vcf	ebi-a-GCST90001993	PDL-1 on CD14+ CD16- monocyte	0.00645451	0.939402
ieu-b-85.vcf	ebi-a-GCST90001697	CD45RA- CD28- CD8+ T cell %T cell	0.0338593	0.623503
ieu-b-85.vcf	ebi-a-GCST90001805	CD27 on memory B cell	0.00665206	0.692956
ieu-b-85.vcf	ebi-a-GCST90001854	CD3 on CD39+ activated CD4 regulatory T cell	0.00730967	0.308893
ieu-b-85.vcf	ebi-a-GCST90001615	TCRgd T cell Absolute Count	0.00631426	0.654241
ieu-b-85.vcf	ebi-a-GCST90001525	CD33dim HLA DR+ CD11b+ Absolute Count	0.00893164	0.940281
ieu-b-85.vcf	ebi-a-GCST90002067	CD4 on CD39+ activated CD4 regulatory T cell	0.00702808	0.469458
ieu-b-85.vcf	ebi-a-GCST90001859	CD3 on CD8+ T cell	0.00724636	0.391311
ieu-b-85.vcf	ebi-a-GCST90001625	HLA DR+ CD4+ T cell %T cell	0.00598089	0.74132
ieu-b-85.vcf	ebi-a-GCST90002040	CD80 on granulocyte	0.00770778	0.965755
ieu-b-85.vcf	ebi-a-GCST90001828	IgD on transitional B cell	0.00649715	0.140435
ieu-b-85.vcf	ebi-a-GCST90001988	HLA DR on CD14+ CD16- monocyte	0.00659002	0.327859
ieu-b-85.vcf	ebi-a-GCST90001558	Terminally Differentiated CD8+ T cell %CD8+ T cell	0.00665921	0.393652
ieu-b-85.vcf	ebi-a-GCST90001913	CD45 on granulocyte	0.00729753	0.518179
ieu-b-85.vcf	ebi-a-GCST90001432	Unswitched memory B cell %lymphocyte	0.0064461	0.660841
ieu-b-85.vcf	ebi-a-GCST90002094	CD11b on Monocytic Myeloid-Derived Suppressor Cells	0.0110375	0.777672
ieu-b-85.vcf	ebi-a-GCST90001550	Central Memory CD8+ T cell %T cell	0.00646971	0.800759
ieu-b-85.vcf	ebi-a-GCST90002099	CD4RA on Terminally Differentiated CD4+ T cell	0.00699967	0.379352
ieu-b-85.vcf	ebi-a-GCST90001407	Memory B cell Absolute Count	0.00665219	0.728646
ieu-b-85.vcf	ebi-a-GCST90001454	CD62L- HLA DR++ monocyte Absolute Count	0.00732803	0.41379
ieu-b-85.vcf	ebi-a-GCST90001825	IgD on IgD+ CD38dim B cell	0.00671308	0.0295607
ieu-b-85.vcf	ebi-a-GCST90001920	CD45 on HLA DR+ CD4+ T cell	0.00717956	0.917182
ieu-b-85.vcf	ebi-a-GCST90002091	CD11b on CD14+ monocyte	0.0110502	0.539984
ieu-b-85.vcf	ebi-a-GCST90001781	CD25 on IgD+ CD38- naive B cell	0.0101461	0.996791
ieu-b-85.vcf	ebi-a-GCST90001588	T/B cell	0.00659655	0.521785
ieu-b-85.vcf	ebi-a-GCST90001688	CD28+ CD45RA+ CD8+ T cell %T cell	0.00456325	0.118103
ieu-b-85.vcf	ebi-a-GCST90001979	CD16 on CD14- CD16+ monocyte	0.00663252	0.993654
ieu-b-85.vcf	ebi-a-GCST90002108	HLA DR on CD33+ HLA DR+ CD14-	0.0107355	0.898788
ieu-b-85.vcf	ebi-a-GCST90001518	CD33+ HLA DR+ CD14- Absolute Count	0.00947248	0.648838
ieu-b-85.vcf	ebi-a-GCST90002092	CD11b on Granulocytic Myeloid-Derived Suppressor Cells	0.0363833	0.881285
ieu-b-85.vcf	ebi-a-GCST90002098	CD45RA on naive CD4+ T cell	0.00690368	0.884548
ieu-b-85.vcf	ebi-a-GCST90001408	Naive-mature B cell %B cell	0.00685071	0.568654
ieu-b-85.vcf	ebi-a-GCST90001648	HLA DR+ Natural Killer Absolute Count	0.00643758	0.104273
ieu-b-85.vcf	ebi-a-GCST90001925	CD127 on CD28+ CD4-CD8- T cell	0.00728049	0.833725
ieu-b-85.vcf	ebi-a-GCST90001798	CD27 on CD24+ CD27+ B cell	0.0065321	0.582425
ieu-b-85.vcf	ebi-a-GCST90001673	CD28- CD127- CD25++ CD8+ T cell %T cell	0.00678433	0.789539
ieu-b-85.vcf	ebi-a-GCST90001984	HLA DR on CD14- CD16+ monocyte	0.00647234	0.913253
ieu-b-85.vcf	ebi-a-GCST90001751	CD20 on IgD+ CD38+ B cell	0.00696857	0.533296
ieu-b-85.vcf	ebi-a-GCST90001508	CD25++ CD45RA+ CD4 not regulatory T cell %CD4+ T cell	0.00699138	0.849446
ieu-b-85.vcf	ebi-a-GCST90001933	CD25 on CD45RA- CD4 not regulatory T cell	0.00682084	0.765133
ieu-b-85.vcf	ebi-a-GCST90001520	CD33+ HLA DR+ CD14dim Absolute Count	0.00998441	0.86186
ieu-b-85.vcf	ebi-a-GCST90001918	CD45 on HLA DR+ T cell	0.00723541	0.326169
ieu-b-85.vcf	ebi-a-GCST90001863	CD3 on CD28+ CD45RA- CD8+ T cell	0.00769414	0.498961
ieu-b-85.vcf	ebi-a-GCST90001670	CD39+ CD8+ T cell %T cell	0.00660705	0.579482
ieu-b-85.vcf	ebi-a-GCST90001501	Activated & secreting CD4 regulatory T cell Absolute Count	0.00674717	0.759954
ieu-b-85.vcf	ebi-a-GCST90001804	CD27 on IgD- CD38dim B cell	0.00656843	0.639839
ieu-b-85.vcf	ebi-a-GCST90001772	CD24 on unswitched memory B cell	0.00675171	0.940834
ieu-b-85.vcf	ebi-a-GCST90002119	CD8 on CD28+ CD45RA+ CD8+ T cell	0.00776256	0.884435
ieu-b-85.vcf	ebi-a-GCST90001883	CD16-CD56 on Natural Killer T	0.00723756	0.642349
ieu-b-85.vcf	ebi-a-GCST90001849	CD3 on HLA DR+ CD4+ T cell	0.00699317	0.988377
ieu-b-85.vcf	ebi-a-GCST90001630	CD8+ Natural Killer T Absolute Count	0.00652565	0.0523434
ieu-b-85.vcf	ebi-a-GCST90001899	CD28 on CD4 regulatory T cell	0.00653824	0.912539
ieu-b-85.vcf	ebi-a-GCST90002073	SSC-A on monocyte	0.00788998	0.660295
ieu-b-85.vcf	ebi-a-GCST90001733	CD19 on IgD- CD38- B cell	0.00670406	0.824975
ieu-b-85.vcf	ebi-a-GCST90001526	CD33dim HLA DR+ CD11b+ %CD33dim HLA DR+	0.00929534	0.55766
ieu-b-85.vcf	ebi-a-GCST90001710	BAFF-R on IgD- CD24- B cell	0.00648287	0.898815
ieu-b-85.vcf	ebi-a-GCST90001757	CD20 on IgD- CD38dim B cell	0.006357	0.917969
ieu-b-85.vcf	ebi-a-GCST90001714	BAFF-R on IgD- CD38dim B cell	0.014702	0.490227
ieu-b-85.vcf	ebi-a-GCST90001773	CD24 on switched memory B cell	0.0067035	0.561049
ieu-b-85.vcf	ebi-a-GCST90001540	Naive CD4+ T cell Absolute Count	0.00630543	0.608039
ieu-b-85.vcf	ebi-a-GCST90002084	SSC-A on Natural Killer T	0.00717492	0.947525
ieu-b-85.vcf	ebi-a-GCST90001754	CD20 on IgD- CD27- B cell	0.00691166	0.664004
ieu-b-85.vcf	ebi-a-GCST90001956	CD33 on CD33+ HLA DR+	0.011425	0.124398
ieu-b-85.vcf	ebi-a-GCST90001420	IgD- CD38+ B cell Absolute Count	0.00668393	0.920712
ieu-b-85.vcf	ebi-a-GCST90001536	CD45RA- CD4+ T cell %T cell	0.00638235	0.685909
ieu-b-85.vcf	ebi-a-GCST90001472	CD62L- CD86+ myeloid Dendritic Cell Absolute Count	0.00666102	0.228514
ieu-b-85.vcf	ebi-a-GCST90001720	BAFF-R on transitional B cell	0.00668197	0.275484
ieu-b-85.vcf	ebi-a-GCST90001475	HLA DR++ monocyte %monocyte	0.00692385	0.617018
ieu-b-85.vcf	ebi-a-GCST90001907	CCR7 on naive CD4+ T cell	0.00724028	0.345481
ieu-b-85.vcf	ebi-a-GCST90002096	CD11b on basophil	0.0111644	0.0821269
ieu-b-85.vcf	ebi-a-GCST90001741	CD19 on IgD+ B cell	0.00640225	0.81883
ieu-b-85.vcf	ebi-a-GCST90002013	CCR2 on myeloid Dendritic Cell	0.00752166	0.161178
ieu-b-85.vcf	ebi-a-GCST90001679	CD25++ CD8+ T cell %T cell	0.00683381	0.671786
ieu-b-85.vcf	ebi-a-GCST90001656	CD28+ CD4-CD8- T cell %CD4-CD8- T cell	0.0070376	0.0423745
ieu-b-85.vcf	ebi-a-GCST90001417	CD24+ CD27+ B cell %B cell	0.00671717	0.937507
ieu-b-85.vcf	ebi-a-GCST90001544	Effector Memory CD4+ T cell %T cell	0.00616554	0.842302
ieu-b-85.vcf	ebi-a-GCST90001694	CD28- CD4-CD8- T cell %T cell	0.00719089	0.1892
ieu-b-85.vcf	ebi-a-GCST90001515	Immature Myeloid-Derived Suppressor Cells Absolute Count	0.00929462	0.644199
ieu-b-85.vcf	ebi-a-GCST90001506	CD25++ CD4+ T cell %T cell	0.00664302	0.921766
ieu-b-85.vcf	ebi-a-GCST90001570	Effector Memory CD4-CD8- T cell %CD4-CD8- T cell	0.00695718	0.29849
ieu-b-85.vcf	ebi-a-GCST90001626	HLA DR+ CD4+ T cell %lymphocyte	0.00591233	0.992865
ieu-b-85.vcf	ebi-a-GCST90001567	Naive CD4-CD8- T cell %CD4-CD8- T cell	0.00579772	0.59737
ieu-b-85.vcf	ebi-a-GCST90001478	CD4 regulatory T cell %CD4+ T cell	0.0068554	0.782271
ieu-b-85.vcf	ebi-a-GCST90001813	CD38 on IgD+ CD38dim B cell	0.00711656	0.440504
ieu-b-85.vcf	ebi-a-GCST90001465	CD86+ myeloid Dendritic Cell %Dendritic Cell	0.00680551	0.737115
ieu-b-85.vcf	ebi-a-GCST90001504	CD25++ CD4+ T cell Absolute Count	0.00671185	0.879404
ieu-b-85.vcf	ebi-a-GCST90001944	CD123 on plasmacytoid Dendritic Cell	0.00817604	0.717878
ieu-b-85.vcf	ebi-a-GCST90002110	HLA DR on CD33dim HLA DR+ CD11b+	0.0107535	0.502185
ieu-b-85.vcf	ebi-a-GCST90001566	Naive CD4-CD8- T cell Absolute Count	0.00500124	0.972183
ieu-b-85.vcf	ebi-a-GCST90001841	CD3 on Central Memory CD4+ T cell	0.00789442	0.31198
ieu-b-85.vcf	ebi-a-GCST90001614	CD8+ and CD8dim T cell %leukocyte	0.00600067	0.787733
ieu-b-85.vcf	ebi-a-GCST90001727	CD19 on IgD+ CD38- naive B cell	0.0099625	0.650741
ieu-b-85.vcf	ebi-a-GCST90001470	CD62L- plasmacytoid Dendritic Cell Absolute Count	0.00668702	0.294874
ieu-b-85.vcf	ebi-a-GCST90001505	CD25++ CD4+ T cell %CD4+ T cell	0.00659977	0.798576
ieu-b-85.vcf	ebi-a-GCST90001397	Unswitched memory B cell %B cell	0.00688457	0.930786
ieu-b-85.vcf	ebi-a-GCST90002030	CD39 on CD39+ activated CD4 regulatory T cell	0.00716752	0.865984
ieu-b-85.vcf	ebi-a-GCST90002047	CD45 on Granulocytic Myeloid-Derived Suppressor Cells	0.0121908	0.742495
ieu-b-85.vcf	ebi-a-GCST90001835	CD62L on granulocyte	0.0073299	0.484796
ieu-b-85.vcf	ebi-a-GCST90001428	IgD- CD38dim B cell %B cell	0.00668018	0.98349
ieu-b-85.vcf	ebi-a-GCST90001580	CD14+ CD16+ monocyte Absolute Count	0.00648005	0.753063
ieu-b-85.vcf	ebi-a-GCST90001704	BAFF-R on IgD+ CD24- B cell	0.00657228	0.812691
ieu-b-85.vcf	ebi-a-GCST90001601	Lymphocyte Absolute Count	0.00650427	0.427416
ieu-b-85.vcf	ebi-a-GCST90001791	CD25 on naive-mature B cell	0.00674217	0.697493
ieu-b-85.vcf	ebi-a-GCST90001469	CD62L- myeloid Dendritic Cell %Dendritic Cell	0.00669828	0.666025
ieu-b-85.vcf	ebi-a-GCST90001869	CD3 on resting CD4 regulatory T cell	0.00725814	0.776402
ieu-b-85.vcf	ebi-a-GCST90001982	CCR2 on CD14- CD16+ monocyte	0.00634841	0.713763
ieu-b-85.vcf	ebi-a-GCST90001674	CD28- CD127- CD25++ CD8+ T cell %CD8+ T cell	0.00699022	0.678881
ieu-b-85.vcf	ebi-a-GCST90001973	FSC-A on CD4+ T cell	0.00674263	0.495798
ieu-b-85.vcf	ebi-a-GCST90001878	HVEM on Effector Memory CD4+ T cell	0.0122093	0.72132
ieu-b-85.vcf	ebi-a-GCST90001678	CD28- CD25++ CD8+ T cell Absolute Count	0.00632462	0.754435
ieu-b-85.vcf	ebi-a-GCST90002086	SSC-A on HLA DR+ CD8+ T cell	0.00717635	0.480394
ieu-b-85.vcf	ebi-a-GCST90001391	IgD+ B cell %B cell	0.00647258	0.513155
ieu-b-85.vcf	ebi-a-GCST90001500	Activated & resting CD4 regulatory T cell %CD4+ T cell	0.00653056	0.841227
ieu-b-85.vcf	ebi-a-GCST90001943	CD25 on activated & secreting CD4 regulatory T cell	0.00680802	0.217337
ieu-b-85.vcf	ebi-a-GCST90001877	HVEM on naive CD4+ T cell	0.0117182	0.666425
ieu-b-85.vcf	ebi-a-GCST90001594	CD4+CD8+ T cell Absolute Count	0.00650882	0.367433
ieu-b-85.vcf	ebi-a-GCST90001442	CD24+ CD27+ B cell %lymphocyte	0.00662323	0.451745
ieu-b-85.vcf	ebi-a-GCST90001639	CD3- lymphocyte Absolute Count	0.00670756	0.17712
ieu-b-85.vcf	ebi-a-GCST90001395	IgD+ CD38- B cell %B cell	0.006436	0.931079
ieu-b-85.vcf	ebi-a-GCST90001468	CD62L- myeloid Dendritic Cell Absolute Count	0.00661721	0.354948
ieu-b-85.vcf	ebi-a-GCST90001604	T cell %lymphocyte	0.00643978	0.735607
ieu-b-85.vcf	ebi-a-GCST90001557	Terminally Differentiated CD8+ T cell Absolute Count	0.00677001	0.474844
ieu-b-85.vcf	ebi-a-GCST90001616	TCRgd T cell %T cell	0.00661711	0.728766
ieu-b-85.vcf	ebi-a-GCST90001609	CD4+ CD8dim T cell Absolute Count	0.00639488	0.852132
ieu-b-85.vcf	ebi-a-GCST90001848	CD3 on Natural Killer T	0.00682906	0.973819
ieu-b-85.vcf	ebi-a-GCST90001583	Monocyte Absolute Count	0.00640451	0.791163
ieu-b-85.vcf	ebi-a-GCST90001586	CD14+ CD16- monocyte %monocyte	0.00629852	0.84567
ieu-b-85.vcf	ebi-a-GCST90001846	CD3 on Central Memory CD8+ T cell	0.0079117	0.118776
ieu-b-85.vcf	ebi-a-GCST90002044	CD45 on CD33dim HLA DR+ CD11b-	0.0104666	0.585712
ieu-b-85.vcf	ebi-a-GCST90001985	CD40 on monocytes	0.00671222	0.772325
ieu-b-85.vcf	ebi-a-GCST90002007	HLA DR on CD14+ CD16+ monocyte	0.00665482	0.690657
ieu-b-85.vcf	ebi-a-GCST90001829	BAFF-R on B cell	0.00666301	0.998804
ieu-b-85.vcf	ebi-a-GCST90001582	CD14+ CD16- monocyte Absolute Count	0.00644792	0.809716
ieu-b-85.vcf	ebi-a-GCST90001548	Central Memory CD8+ T cell Absolute Count	0.00623943	0.880678
ieu-b-85.vcf	ebi-a-GCST90001436	Memory B cell %lymphocyte	0.00665462	0.932618
ieu-b-85.vcf	ebi-a-GCST90001403	Switched memory B cell Absolute Count	0.00641076	0.517093
ieu-b-85.vcf	ebi-a-GCST90001836	CD66b on CD66b++ myeloid cell	0.0116829	0.565393
ieu-b-85.vcf	ebi-a-GCST90001691	CD28+ CD45RA- CD8+ T cell %T cell	0.00621588	0.0680264
ieu-b-85.vcf	ebi-a-GCST90001545	Terminally Differentiated CD4+ T cell Absolute Count	0.00701388	0.178806
ieu-b-85.vcf	ebi-a-GCST90001705	BAFF-R on IgD+ CD38- B cell	0.00655819	0.766593
ieu-b-85.vcf	ebi-a-GCST90001433	IgD- CD27- B cell %lymphocyte	0.00638211	0.176556
ieu-b-85.vcf	ebi-a-GCST90001902	CD28 on activated CD4 regulatory T cell	0.00685809	0.811625
ieu-b-85.vcf	ebi-a-GCST90001972	FSC-A on T cell	0.00670336	0.6521
ieu-b-85.vcf	ebi-a-GCST90001924	CD127 on CD28+ CD4+ T cell	0.00734084	0.583491
ieu-b-85.vcf	ebi-a-GCST90001977	FSC-A on HLA DR+ CD4+ T cell	0.00676904	0.747398
ieu-b-85.vcf	ebi-a-GCST90001958	CD4 on monocyte	0.00722116	0.845478
ieu-b-85.vcf	ebi-a-GCST90001431	IgD+ CD38- B cell %lymphocyte	0.00685827	0.477003
ieu-b-85.vcf	ebi-a-GCST90001597	CD8dim T cell %T cell	0.00637606	0.904484
ieu-b-85.vcf	ebi-a-GCST90001481	Resting CD4 regulatory T cell %CD4 regulatory T cell	0.00597327	0.962228
ieu-b-85.vcf	ebi-a-GCST90001706	BAFF-R on IgD+ CD38- naive B cell	0.00999249	0.574661
ieu-b-85.vcf	ebi-a-GCST90001532	Basophil Absolute Count	0.00914585	0.422348
ieu-b-85.vcf	ebi-a-GCST90001611	CD4+ CD8dim T cell %leukocyte	0.00611252	0.907678
ieu-b-85.vcf	ebi-a-GCST90002005	CD16 on CD14+ CD16+ monocyte	0.00657419	0.26563
ieu-b-85.vcf	ebi-a-GCST90002016	CCR2 on CD62L+ plasmacytoid Dendritic Cell	0.00756487	0.370272
ieu-b-85.vcf	ebi-a-GCST90001649	HLA DR+ Natural Killer %Natural Killer	0.00673571	0.57341
ieu-b-85.vcf	ebi-a-GCST90001608	CD4+CD8+ T cell %leukocyte	0.00652622	0.62469
ieu-b-85.vcf	ebi-a-GCST90002120	CD8 on CD28- CD8+ T cell	0.00764554	0.804333
ieu-b-85.vcf	ebi-a-GCST90001572	Terminally Differentiated CD4-CD8- T cell Absolute Count	0.00700994	0.694431
ieu-b-85.vcf	ebi-a-GCST90001889	CD28 on activated & secreting CD4 regulatory T cell	0.00680867	0.832041
ieu-b-85.vcf	ebi-a-GCST90001766	CD24 on IgD+ CD38- B cell	0.00670609	0.696479
ieu-b-85.vcf	ebi-a-GCST90002107	HLA DR on Hematopoietic Stem Cell	0.0226563	0.151613
ieu-b-85.vcf	ebi-a-GCST90001455	CD62L- HLA DR++ monocyte %monocyte	0.00726541	0.573256
ieu-b-85.vcf	ebi-a-GCST90001726	CD19 on IgD+ CD38- B cell	0.00652611	0.476942
ieu-b-85.vcf	ebi-a-GCST90002071	SSC-A on myeloid Dendritic Cell	0.00780849	0.449762
ieu-b-85.vcf	ebi-a-GCST90001427	IgD- CD38- B cell %lymphocyte	0.00648039	0.618335
ieu-b-85.vcf	ebi-a-GCST90002113	HLA DR on HLA DR+ T cell	0.00697726	0.335509
ieu-b-85.vcf	ebi-a-GCST90001712	BAFF-R on IgD- CD38- B cell	0.00663322	0.628698
ieu-b-85.vcf	ebi-a-GCST90001935	CD25 on CD39+ CD4 regulatory T cell	0.00711557	0.0362016
ieu-b-85.vcf	ebi-a-GCST90002033	CD39 on granulocyte	0.00760317	0.303508
ieu-b-85.vcf	ebi-a-GCST90001722	CD19 on CD20- CD38- B cell	0.00641274	0.677028
ieu-b-85.vcf	ebi-a-GCST90002023	CD4 on Central Memory CD4+ T cell	0.00735815	0.316176
ieu-b-85.vcf	ebi-a-GCST90002008	CCR2 on monocyte	0.00635314	0.878755
ieu-b-85.vcf	ebi-a-GCST90001787	CD25 on IgD- CD38- B cell	0.00624833	0.877328
ieu-b-85.vcf	ebi-a-GCST90002117	HLA DR on HLA DR+ Natural Killer	0.00732196	0.879627
ieu-b-85.vcf	ebi-a-GCST90002064	CD4 on resting CD4 regulatory T cell	0.00687025	0.380869
ieu-b-85.vcf	ebi-a-GCST90001809	CD38 on CD20- B cell	0.00652649	0.528554
ieu-b-85.vcf	ebi-a-GCST90001672	CD39+ CD8+ T cell Absolute Count	0.00679276	0.910671
ieu-b-85.vcf	ebi-a-GCST90001463	CD62L- Dendritic Cell %Dendritic Cell	0.00685228	0.971488
ieu-b-85.vcf	ebi-a-GCST90001707	BAFF-R on IgD+ CD38- unswitched memory B cell	0.0102784	0.782704
ieu-b-85.vcf	ebi-a-GCST90001655	CD28+ CD4-CD8- T cell %T cell	0.00590267	0.82707
ieu-b-85.vcf	ebi-a-GCST90001412	IgD+ CD24+ B cell Absolute Count	0.00652025	0.47521
ieu-b-85.vcf	ebi-a-GCST90001687	CD28- CD8+ T cell Absolute Count	0.00647457	0.129562
ieu-b-85.vcf	ebi-a-GCST90001856	CD3 on CD39+ secreting CD4 regulatory T cell	0.00720768	0.65683
ieu-b-85.vcf	ebi-a-GCST90001696	CD45RA- CD28- CD8+ T cell %CD8+ T cell	0.0799916	0.703346
ieu-b-85.vcf	ebi-a-GCST90001448	CD11c+ monocyte Absolute Count	0.00699017	0.248853
ieu-b-85.vcf	ebi-a-GCST90001665	CD28+ CD45RA+ CD8dim T cell %CD8dim T cell	0.00642975	0.227478
ieu-b-85.vcf	ebi-a-GCST90002057	CD8 on Terminally Differentiated CD8+ T cell	0.00741341	0.91687
ieu-b-85.vcf	ebi-a-GCST90001916	CD45 on CD4+ T cell	0.00666422	0.257654
ieu-b-85.vcf	ebi-a-GCST90001519	CD33+ HLA DR+ CD14- %CD33+ HLA DR+	0.0104709	0.22611
ieu-b-85.vcf	ebi-a-GCST90001748	CD20 on IgD+ CD38- B cell	0.0064017	0.561827
ieu-b-85.vcf	ebi-a-GCST90001479	CD4 regulatory T cell %T cell	0.00689225	0.746256
ieu-b-85.vcf	ebi-a-GCST90001634	CD8dim Natural Killer T %T cell	0.00662469	0.60659
ieu-b-85.vcf	ebi-a-GCST90001529	CD66b++ myeloid cell Absolute Count	0.00884397	0.957606
ieu-b-85.vcf	ebi-a-GCST90001451	CD62L- monocyte %monocyte	0.00712407	0.953605
ieu-b-85.vcf	ebi-a-GCST90002070	CD4 on activated & secreting CD4 regulatory T cell	0.00713673	0.473073
ieu-b-85.vcf	ebi-a-GCST90001752	CD20 on IgD+ CD38dim B cell	0.00663582	0.916227
ieu-b-85.vcf	ebi-a-GCST90001513	CD4 regulatory T cell Absolute Count	0.00694886	0.895587
ieu-b-85.vcf	ebi-a-GCST90001816	CD38 on naive-mature B cell	0.00689147	0.958655
ieu-b-85.vcf	ebi-a-GCST90001940	CD25 on CD39+ activated CD4 regulatory T cell	0.00693142	0.161147
ieu-b-85.vcf	ebi-a-GCST90001756	CD20 on IgD- CD38+ B cell	0.00654368	0.16345
ieu-b-85.vcf	ebi-a-GCST90001692	CD28+ CD45RA- CD8+ T cell %CD8+ T cell	0.00660622	0.625875
ieu-b-85.vcf	ebi-a-GCST90001965	FSC-A on monocyte	0.00711243	0.971586
ieu-b-85.vcf	ebi-a-GCST90001647	Natural Killer %lymphocyte	0.00602614	0.85351
ieu-b-85.vcf	ebi-a-GCST90001807	CD27 on Plasma Blast-Plasma Cell	0.0061712	0.396264
ieu-b-85.vcf	ebi-a-GCST90002063	CD4 on CD4 regulatory T cell	0.00723755	0.556549
ieu-b-85.vcf	ebi-a-GCST90001406	Memory B cell %B cell	0.00675064	0.729977
ieu-b-85.vcf	ebi-a-GCST90001853	CD3 on activated CD4 regulatory T cell	0.00727072	0.494576
ieu-b-85.vcf	ebi-a-GCST90001419	CD20- B cell %B cell	0.00646404	0.580183
ieu-b-85.vcf	ebi-a-GCST90001421	CD20- B cell Absolute Count	0.00651578	0.467049
ieu-b-85.vcf	ebi-a-GCST90002027	CD4 on CD45RA+ CD4+ T cell	0.00737569	0.776531
ieu-b-85.vcf	ebi-a-GCST90001843	CD3 on Effector Memory CD4+ T cell	0.0073681	0.997428
ieu-b-85.vcf	ebi-a-GCST90001658	CD39+ CD4+ T cell %T cell	0.00607584	0.577464
ieu-b-85.vcf	ebi-a-GCST90001484	CD39+ resting CD4 regulatory T cell %resting CD4 regulatory T cell	0.00624782	0.342691
ieu-b-85.vcf	ebi-a-GCST90002048	CD45 on CD66b++ myelod cell	0.0117979	0.751613
ieu-b-85.vcf	ebi-a-GCST90001963	FSC-A on myeloid Dendritic Cell	0.00807682	0.532497
ieu-b-85.vcf	ebi-a-GCST90001476	HLA DR++ monocyte %leukocyte	0.00685495	0.69397
ieu-b-85.vcf	ebi-a-GCST90001887	CD28 on secreting CD4 regulatory T cell	0.00705511	0.837517
ieu-b-85.vcf	ebi-a-GCST90001926	CD127 on granulocyte	0.00729138	0.507002
ieu-b-85.vcf	ebi-a-GCST90001723	CD19 on CD24+ CD27+ B cell	0.00651523	0.461379
ieu-b-85.vcf	ebi-a-GCST90001399	IgD- CD27- B cell %B cell	0.00652161	0.89895
ieu-b-85.vcf	ebi-a-GCST90001467	CD86+ plasmacytoid Dendritic Cell %Dendritic Cell	0.00688825	0.981444
ieu-b-85.vcf	ebi-a-GCST90001659	CD39+ CD4+ T cell %CD4+ T cell	0.00605661	0.275062
ieu-b-85.vcf	ebi-a-GCST90001401	IgD- CD27- B cell Absolute Count	0.00665614	0.850324
ieu-b-85.vcf	ebi-a-GCST90002028	CD19 on B cell	0.0070188	0.197362
ieu-b-85.vcf	ebi-a-GCST90002081	SSC-A on CD4+ T cell	0.00709181	0.880522
ieu-b-85.vcf	ebi-a-GCST90001453	CD11c+ CD62L- monocyte %monocyte	0.00724384	0.304978
ieu-b-85.vcf	ebi-a-GCST90001954	CD33 on basophil	0.0112121	0.423308
ieu-b-85.vcf	ebi-a-GCST90001927	CD127 on CD8+ T cell	0.00688629	0.388414
ieu-b-85.vcf	ebi-a-GCST90001758	CD20 on memory B cell	0.0064054	0.711496
ieu-b-85.vcf	ebi-a-GCST90001598	CD4-CD8- T cell Absolute Count	0.00609946	0.195825
ieu-b-85.vcf	ebi-a-GCST90001434	Switched memory B cell %lymphocyte	0.00650844	0.29386
ieu-b-85.vcf	ebi-a-GCST90002049	CD45 on Monocytic Myeloid-Derived Suppressor Cells	0.0100412	0.639233
ieu-b-85.vcf	ebi-a-GCST90001961	CD25 on CD39+ CD4+ T cell	0.00723991	0.657277
ieu-b-85.vcf	ebi-a-GCST90001939	CD25 on activated CD4 regulatory T cell	0.007019	0.0732119
ieu-b-85.vcf	ebi-a-GCST90001750	CD20 on IgD+ CD38- unswitched memory B cell	0.00960354	0.745245
ieu-b-85.vcf	ebi-a-GCST90001724	CD19 on IgD+ CD24+ B cell	0.00663205	0.984135
ieu-b-85.vcf	ebi-a-GCST90001966	FSC-A on granulocyte	0.00745295	0.695304
ieu-b-85.vcf	ebi-a-GCST90001745	CD20 on CD24+ CD27+ B cell	0.00652029	0.744931
ieu-b-85.vcf	ebi-a-GCST90001457	CD11c+ HLA DR++ monocyte %monocyte	0.00744972	0.502347
ieu-b-85.vcf	ebi-a-GCST90001683	CD127- CD8+ T cell %CD8+ T cell	0.00649251	0.585546
ieu-b-85.vcf	ebi-a-GCST90001796	CD27 on CD20- B cell	0.00615508	0.573546
ieu-b-85.vcf	ebi-a-GCST90001814	CD38 on IgD- CD38+ B cell	0.00657897	0.735897
ieu-b-85.vcf	ebi-a-GCST90002009	HLA DR on CD14- CD16-	0.00640251	0.442873
ieu-b-85.vcf	ebi-a-GCST90001922	CD127 on T cell	0.00706344	0.239113
ieu-b-85.vcf	ebi-a-GCST90001801	CD27 on IgD+ CD38- unswitched memory B cell	0.00955728	0.886892
ieu-b-85.vcf	ebi-a-GCST90001842	CD3 on Naive CD4+ T cell	0.00757677	0.175397
ieu-b-85.vcf	ebi-a-GCST90002012	CX3CR1 on CD14- CD16+ monocyte	0.00649536	0.661769
ieu-b-85.vcf	ebi-a-GCST90002115	HLA DR on HLA DR+ CD8+ T cell	0.00668028	0.541241
ieu-b-85.vcf	ebi-a-GCST90001496	CD39+ secreting CD4 regulatory T cell %secreting CD4 regulatory T cell	0.00661688	0.619429
ieu-b-85.vcf	ebi-a-GCST90001600	Leukocyte Absolute Count	0.0136661	0.621881
ieu-b-85.vcf	ebi-a-GCST90001523	CD33- HLA DR+ Absolute Count	0.00897524	0.903363
ieu-b-85.vcf	ebi-a-GCST90002056	CD8 on Effector Memory CD8+ T cell	0.00728783	0.775981
ieu-b-85.vcf	ebi-a-GCST90001792	CD25 on unswitched memory B cell	0.00647082	0.72944
ieu-b-85.vcf	ebi-a-GCST90002106	HLA DR on Dendritic Cell	0.00717263	0.566018
ieu-b-85.vcf	ebi-a-GCST90001738	CD19 on unswitched memory B cell	0.00664721	0.660697
ieu-b-85.vcf	ebi-a-GCST90001439	IgD+ CD24+ B cell %lymphocyte	0.00642303	0.77171
ieu-b-85.vcf	ebi-a-GCST90001517	CD33+ HLA DR+ Absolute Count	0.00985579	0.693268
ieu-b-85.vcf	ebi-a-GCST90001547	Terminally Differentiated CD4+ T cell %T cell	0.00631796	0.913455
ieu-b-85.vcf	ebi-a-GCST90001662	CD28- CD8dim T cell %CD8dim T cell	0.00659921	0.263523
ieu-b-85.vcf	ebi-a-GCST90001739	CD19 on Plasma Blast-Plasma Cell	0.00640013	0.503358
ieu-b-85.vcf	ebi-a-GCST90001443	CD20- B cell %lymphocyte	0.00629962	0.798248
ieu-b-85.vcf	ebi-a-GCST90001681	CD25++ CD8+ T cell Absolute Count	0.0072412	0.590111
ieu-b-85.vcf	ebi-a-GCST90001631	CD8+ Natural Killer T %T cell	0.00634935	0.175607
ieu-b-85.vcf	ebi-a-GCST90001590	CD4+ T cell Absolute Count	0.00613878	0.639859
ieu-b-85.vcf	ebi-a-GCST90001945	CD123 on CD62L+ plasmacytoid Dendritic Cell	0.00827334	0.748521
ieu-b-85.vcf	ebi-a-GCST90001971	FSC-A on lymphocyte	0.00652549	0.992989
ieu-b-85.vcf	ebi-a-GCST90001823	IgD on IgD+ CD38- unswitched memory B cell	0.010657	0.2401
ieu-b-85.vcf	ebi-a-GCST90001737	CD19 on naive-mature B cell	0.00634758	0.9146
ieu-b-85.vcf	ebi-a-GCST90001987	CD64 on CD14+ CD16- monocyte	0.00631563	0.736247
ieu-b-85.vcf	ebi-a-GCST90001492	Secreting CD4 regulatory T cell Absolute Count	0.0069277	0.976678
ieu-b-85.vcf	ebi-a-GCST90001803	CD27 on IgD- CD38+ B cell	0.00660772	0.264362
ieu-b-85.vcf	ebi-a-GCST90002079	SSC-A on lymphocyte	0.00656999	0.787945
ieu-b-85.vcf	ebi-a-GCST90001990	CD64 on CD14- CD16+ monocyte	0.00678777	0.763409
ieu-b-85.vcf	ebi-a-GCST90001577	Transitional B cell Absolute Count	0.00658853	0.994471
ieu-b-85.vcf	ebi-a-GCST90001881	HVEM on CD8+ T cell	0.0123154	0.687845
ieu-b-85.vcf	ebi-a-GCST90001622	Natural Killer T %T cell	0.00637752	0.479188
ieu-b-85.vcf	ebi-a-GCST90001489	CD39+ activated CD4 regulatory T cell Absolute Count	0.00665516	0.737635
ieu-b-85.vcf	ebi-a-GCST90001560	CD45RA+ CD8+ T cell Absolute Count	0.00558001	0.589418
ieu-b-85.vcf	ebi-a-GCST90001976	FSC-A on Natural Killer T	0.00694692	0.347791
ieu-b-85.vcf	ebi-a-GCST90001685	CD28- CD8+ T cell %T cell	0.00632209	0.693744
ieu-b-85.vcf	ebi-a-GCST90001708	BAFF-R on IgD+ CD38+ B cell	0.00658099	0.771209
ieu-b-85.vcf	ebi-a-GCST90001394	IgD+ CD38dim B cell Absolute Count	0.00626017	0.636945
ieu-b-85.vcf	ebi-a-GCST90001875	HVEM on CD4+ T cell	0.012104	0.830524
ieu-b-85.vcf	ebi-a-GCST90001530	Monocytic Myeloid-Derived Suppressor Cells Absolute Count	0.00905294	0.484636
ieu-b-85.vcf	ebi-a-GCST90001440	IgD- CD24- B cell %lymphocyte	0.0065345	0.580535
ieu-b-85.vcf	ebi-a-GCST90001698	CD45RA+ CD28- CD8+ T cell Absolute Count	0.957701	0.0954498
ieu-b-85.vcf	ebi-a-GCST90002052	CD45 on Immature Myeloid-Derived Suppressor Cells	0.0102432	0.708704
ieu-b-85.vcf	ebi-a-GCST90001591	CD4+ T cell %T cell	0.00608857	0.283667
ieu-b-85.vcf	ebi-a-GCST90001398	Unswitched memory B cell Absolute Count	0.0065835	0.437142
ieu-b-85.vcf	ebi-a-GCST90001743	CD20 on B cell	0.0064781	0.843196
ieu-b-85.vcf	ebi-a-GCST90002003	CCR2 on CD14- CD16-	0.00627301	0.387089
ieu-b-85.vcf	ebi-a-GCST90001393	IgD+ CD38dim B cell %B cell	0.00650995	0.518597
ieu-b-85.vcf	ebi-a-GCST90001488	Activated CD4 regulatory T cell %CD4+ T cell	0.00649282	0.192646
ieu-b-85.vcf	ebi-a-GCST90001980	CD40 on CD14+ CD16- monocyte	0.00636515	0.606743
ieu-b-85.vcf	ebi-a-GCST90001912	CD45 on HLA DR+ Natural Killer	0.00719865	0.795657
ieu-b-85.vcf	ebi-a-GCST90001531	CD33dim HLA DR- Absolute Count	0.00925918	0.522128
ieu-b-85.vcf	ebi-a-GCST90001414	IgD- CD24- B cell Absolute Count	0.00660058	0.976701
ieu-b-85.vcf	ebi-a-GCST90001610	CD4+ CD8dim T cell %lymphocyte	0.0059998	0.887094
ieu-b-85.vcf	ebi-a-GCST90001765	CD24 on IgD+ CD24+ B cell	0.00680973	0.975199
ieu-b-85.vcf	ebi-a-GCST90001914	CD45 on lymphocyte	0.00671961	0.653588
